# Supplementary material for: ArNMeCH(SiMe3)2: a useful precursor of formal α-aminoalkyl diradicals in visible-light-mediated homo- and hetero-diaddition with alkenes
Source: Royal Society of Chemistry journal article supplement (doi:10.1039/d0cc02277b), 2020-01-01

# **ArNMeCH(SiMe<sub>3</sub>)<sub>2</sub>: A Useful Precursor of Formal $\alpha$ -Aminoalkyl Diradical in Visible-Light-Mediated Homo- or Hetero- Diaddition with Alkenes**

Shunfa Liu, Yufan Yang, Lu Gao\* and Zhenlei Song\*

*Key Laboratory of Drug-Targeting and Drug Delivery System of the Education Ministry and Sichuan Province, Sichuan Engineering Laboratory for Plant-Sourced Drug and Sichuan Research Center for Drug Precision Industrial Technology, West China School of Pharmacy, Sichuan University, Chengdu 610041, China.*

E-mail: [lugao@scu.edu.cn](mailto:lugao@scu.edu.cn); [zhenleisong@scu.edu.cn](mailto:zhenleisong@scu.edu.cn)

## **Table of Contents**

|                                                                      |                 |
|----------------------------------------------------------------------|-----------------|
| <b>1. General Methods .....</b>                                      | <b>S2</b>       |
| <b>2. Experimental Procedures and Spectral Data of Products.....</b> | <b>S2-S55</b>   |
| <b>2.1. Synthesis of 4.....</b>                                      | <b>S3-S4</b>    |
| <b>2.2. Synthesis of 1a-m and 8.....</b>                             | <b>S4-S17</b>   |
| <b>2.3. Synthesis of 2a-y and 7.....</b>                             | <b>S17-S37</b>  |
| <b>2.4. Synthesis of 6a-m.....</b>                                   | <b>S37-S46</b>  |
| <b>2.5. Synthesis of 3a-k.....</b>                                   | <b>S46-S54</b>  |
| <b>2.7. Cyclic Voltammetry Analysis.....</b>                         | <b>S54-S55</b>  |
| <b>3. <sup>1</sup>H and <sup>13</sup>C NMR Spectral Copies .....</b> | <b>S56-S224</b> |

## 1. General Methods

All reagents purchased from Energy-Chemical, Inno-Chem, JK-chemical, BiDepharm, LaaJoo, Aladdin and TCI without additional purification. Synthesis of substrates were performed using common anhydrous, argon atmosphere with magnetic stirring. Visible-light-induced catalytic reactions were performed in 15 ml Schlenk seal tubes (purchased from Sythware Glass, Art. No. P260001) at room temperature under an argon atmosphere and under irradiation with 40W blue LEDs lamp Kessil PR160-427nm. Inert atmosphere techniques was carried out through Schlenk system and Standard Glovebox (purchased from Vigor Gas Purification Technologies (Suzhou) Co. Ltd.) Reactions were monitored by TLC which was performed on glass-backed silica plates (purchased from Yantai Jiangyou Silica Gel Development Co. Ltd.) and visualized using UV,  $\text{KMnO}_4$  stains,  $\text{H}_3\text{PO}_4 \cdot 12\text{MoO}_3/\text{EtOH}$  stains,  $\text{H}_2\text{SO}_4$  (conc.)/anisaldehyde/ EtOH stains. Column chromatography was performed using silica gel (200-300 or 300-400 mesh) eluting with EtOAc/petroleum ether. Melting point were recorded at WRX-4 Melting-point Apparatus (purchased from Shanghai Yice Apparatus & Equipments Co. Lit.).  $^1\text{H}$  NMR spectra were recorded at 400 MHz (Varian and Bruker) or 600 MHz (Agilent),  $^{13}\text{C}$  NMR spectra were recorded at 100 MHz (Bruker) or 150 MHz (Agilent) using  $\text{CDCl}_3$  (except where noted) with TMS as standard. NMR standards were used as follows:  $\text{CDCl}_3 = 7.26$  ppm ( $^1\text{H}$  NMR), 77.1 ppm ( $^{13}\text{C}$  NMR). Infrared spectra were obtained using PerkinElmer Spectrum Two FT-IR Spectrometer. High-resolution mass spectral analyses performed on Waters Q-TOF in positive mode. Electrochemical potentials were obtained with a standard set of conditions to main internal consistency. Cyclic voltammograms were collected with a CH Instruments Model 600E Series Electrochemical Analyzer/Workstation containing platinum wire working electrode, platinum wire counter electrode, saturated KCl silver-silver chloride electrode reference electrode (Sweep rate: 20 mV/s).  $\text{TMSCl}$  were distilled from  $\text{CaH}_2$ .  $\text{CH}_2\text{Cl}_2$  were distilled from  $\text{CaH}_2$ , THF were distilled from Na. All spectral data obtained for new compounds are reported here.

## 2. Experimental Procedures and Spectral Data of Products

### 2.1. Synthesis of bis(trimethylsilyl)methylamine (BSMA) **4**

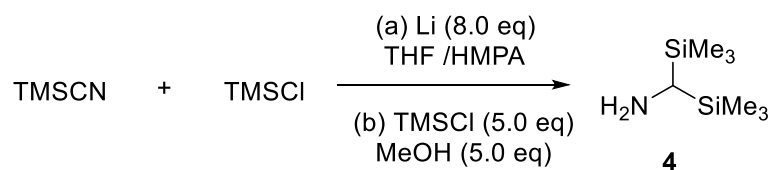

**4** was synthesized according to this protocol reported by Picard and coworkers.<sup>1</sup>

To a mixture of granular lithium (3.92 g, 564.5 mmol), trimethylsilyl cyanide (8.83 mL, 70.6 mmol) and chlorotrimethylsilane (358 mL, 2.82 mol) in THF (175 mL) was added dropwise the mixture of hexamethylphosphoramide (126 mL) and THF (35 mL) at 0 °C. The mixture was stirred for four days at 0 °C, then concentrated in vacuo. To the residue was added water (400 mL). The resulting mixture was neutralized with sat. aq. NaOH, then extracted with hexane (3 × 50 mL). The combined organic layers were dried over MgSO<sub>4</sub>, filtered and concentrated in vacuo to afford crude residue, which was used for next reaction without purification.

To the mixture of the above residue in MeOH (14.5 mL, 352.8 mmol) was added dropwise chlorotrimethylsilane (45 mL, 352.8 mmol) at 0 °C. The mixture was stirred for 30 min at 25 °C, then concentrated in vacuo. To the residue was added water (100 mL). The resulting mixture was filtered and the filtration was alkalized with sat. aq. NaOH, and extracted with Et<sub>2</sub>O (4 × 30 mL). The combined organic layers were dried over NaOH, filtered and concentrated in vacuo to afford bis(trimethylsilyl)methylamine **4** (8.4 g, yield: 68 %) as a faint yellow liquid, which was used for next reaction without purification.

#### Spectral Data of **4**

<sup>1</sup>H NMR (400 MHz, CDCl<sub>3</sub>) δ 1.61 (s, 1H), 0.97 (s, 2H), 0.04 (s, 18H);

<sup>13</sup>C NMR (100 MHz, CDCl<sub>3</sub>) δ 31.5, -1.6;

1. J. P. Picard, S. Grelier, T. Constantieux, and J. Dunogués, *Organometallics*, 1993, **12**, 1378.

IR (neat)  $\text{cm}^{-1}$  2955, 1650, 1594, 1249, 841, 751;

HRMS (ESI-TOF,  $m/z$ ) calcd for  $\text{C}_7\text{H}_{22}\text{NSi}_2$  ( $\text{M}+\text{H}$ )<sup>+</sup>: 176.1285, found 176.1286.

## 2.2. Synthesis of Geminal Bis(silyl) Amines **1a-m** and **8**

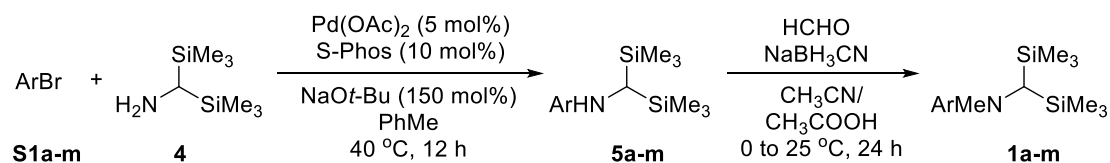

**General procedure A.** A dried 15 mL Schlenk seal tube was charged with  $\text{Pd}(\text{OAc})_2$  (17.5 mg, 0.078 mmol), S-Phos (64 mg, 0.16 mmol) and NaOt-Bu (225 mg, 2.34 mmol) in Standard Glovebox. Then to the mixture was added aryl bromides **S1a-m** (1.56 mmol), bis(trimethylsilyl)methylamine **4** (300 mg, 1.72 mmol) and toluene (5 mL) at 25 °C under positive argon pressure. The mixture was stirred for 12 h at 40 °C, then quenched with water (10 mL) and extracted with EtOAc ( $3 \times 10$  mL). The combined organic layers were dried over  $\text{MgSO}_4$ , filtered and concentrated in vacuo. The residues were purified by silica gel chromatography (gradient eluent: petroleum ether/EtOAc = 500:1→250:1) to afford geminal bis(silyl) secondary aryl amines **5a-m**.

To a suspension of **5a-m** (1.0 mmol) and sodium cyanoborohydride (630 mg, 10 mmol) in  $\text{CH}_3\text{CN}$  (5 mL) was added 40 % formaldehyde aqueous solution (0.7 mL, 10 mmol) and  $\text{CH}_3\text{CO}_2\text{H}$  (0.5 mL) at 0 °C. The mixture was stirred for additional 60 min at 0 °C and warmed to 25 °C for 24 h. The reaction was quenched with water (10 mL) and extracted with EtOAc ( $3 \times 10$  mL). The combined organic layers were dried over  $\text{MgSO}_4$ , filtered and concentrated in vacuo. The residues were purified by silica gel chromatography (gradient eluent: petroleum ether/EtOAc = 500:1→250:1) to afford geminal bis(silyl) aryl amines **1a-m**.

### Preparation of **1a**

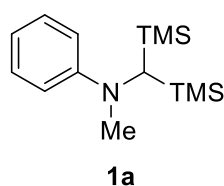

According to General Procedure A, bromobenzene (**S1a**, 245 mg, 1.56 mmol) was converted to corresponding **5a** (302 mg, 77 % yield) as a colorless liquid. **5a** (252 mg, 1.0 mmol) was converted to **1a** (231 mg, 87 % yield) as a faint yellow liquid.

#### **Spectral Data of 5a**

$^1\text{H}$  NMR (400 MHz,  $\text{CDCl}_3$ )  $\delta$  7.12 (dd,  $J_1 = 8.4$  Hz,  $J_2 = 7.2$  Hz, 2H), 6.59-6.52 (m, 3H), 3.28 (s, 1H), 2.41 (s, 1H), 0.07 (s, 18H);

$^{13}\text{C}$  NMR (100 MHz,  $\text{CDCl}_3$ )  $\delta$  150.2, 129.1, 115.7, 112.3, 34.3, -1.0;

IR (neat)  $\text{cm}^{-1}$  2953, 1599, 1499, 1317, 1251, 843, 764;

HRMS (ESI-TOF,  $m/z$ ) calcd for  $\text{C}_{13}\text{H}_{26}\text{NSi}_2$  ( $\text{M}+\text{H}$ ) $^+$ : 252.1598, found 252.1600.

#### **Spectral Data of 1a**

$^1\text{H}$  NMR (400 MHz,  $\text{CDCl}_3$ )  $\delta$  7.19 (dd,  $J_1 = 9.0$  Hz,  $J_2 = 7.2$  Hz, 2H), 6.62 (d,  $J = 9.0$  Hz, 2H), 6.56 (t,  $J = 7.2$  Hz, 1H), 2.96 (s, 3H), 2.91 (s, 1H), 0.11 (s, 18H);

$^{13}\text{C}$  NMR (100 MHz,  $\text{CDCl}_3$ )  $\delta$  150.7, 129.0, 114.1, 111.0, 43.5, 38.9, 0.6;

IR (neat)  $\text{cm}^{-1}$  2953, 2896, 1560, 1502, 1353, 1251, 841;

HRMS (ESI-TOF,  $m/z$ ) calcd for  $\text{C}_{14}\text{H}_{28}\text{NSi}_2$  ( $\text{M}+\text{H}$ ) $^+$ : 266.1755, found 266.1757.

#### ***Preparation of 1b***

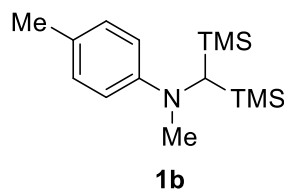

According to the General Procedure A, 1-bromo-4-methylbenzene (**S1b**, 267 mg, 1.56 mmol) was converted to corresponding **5b** (294 mg, 71 % yield, mp: 46-48.5 °C) as a white solid. **5b** (266 mg, 1 mmol) was converted to **1b** (62 mg, 22 % yield) as a colorless liquid.

#### **Spectral Data of 5b**

$^1\text{H}$  NMR (400 MHz,  $\text{CDCl}_3$ )  $\delta$  6.94 (d,  $J = 8.0$  Hz, 2H), 6.47 (d,  $J = 8.0$  Hz, 2H), 3.19 (s, 1H), 2.37 (s, 1H), 2.23 (s, 3H), 0.07 (s, 18H);

$^{13}\text{C}$  NMR (100 MHz,  $\text{CDCl}_3$ )  $\delta$  148.1, 129.6, 124.7, 112.3, 34.5, 20.4, -0.9;

IR (neat)  $\text{cm}^{-1}$  2952, 1616, 1514, 1313, 1249, 1013, 839, 763;

HRMS (ESI-TOF,  $m/z$ ) calcd for  $\text{C}_{14}\text{H}_{28}\text{NSi}_2$  ( $\text{M}+\text{H}$ ) $^+$ : 266.1755, found 266.1755.

### **Spectral Data of 1b**

$^1\text{H}$  NMR (400 MHz,  $\text{CDCl}_3$ )  $\delta$  6.99 (d,  $J = 8.4$  Hz, 2H), 6.54 (d,  $J = 8.4$  Hz, 2H), 2.93 (s, 3H), 2.86 (s, 1H), 2.23 (s, 3H), 0.10 (s, 18H);

$^{13}\text{C}$  NMR (100 MHz,  $\text{CDCl}_3$ )  $\delta$  148.8, 129.6, 123.0, 111.1, 43.7, 39.0, 20.2, 0.7;

IR (neat)  $\text{cm}^{-1}$  2953, 1616, 1516, 1349, 1250, 1193, 1015, 839, 795, 765;

HRMS (ESI-TOF,  $m/z$ ) calcd for  $\text{C}_{15}\text{H}_{30}\text{NSi}_2$  ( $\text{M}+\text{H}$ ) $^+$ : 280.1911, found 280.1904.

### ***Preparation of 1c***

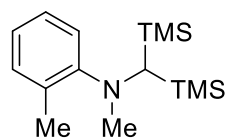

**1c**

According to the General Procedure A, 1-bromo-2-methylbenzene (**S1c**, 267 mg, 1.56 mmol) was converted to corresponding **5c** (373 mg, 90 % yield) as a faint yellow liquid. Then **5c** (266 mg, 1 mmol) was converted to **1c** (168 mg, 60% yield) as a colorless liquid.

### **Spectral Data of 5c**

$^1\text{H}$  NMR (400 MHz,  $\text{CDCl}_3$ )  $\delta$  7.15 (t,  $J = 8.0$  Hz, 1H), 7.07 (d,  $J = 8.0$  Hz, 1H), 6.61-6.58 (m, 2H), 3.28 (s, 1H), 2.60 (s, 1H), 2.20 (s, 3H), 0.15 (s, 18H);

$^{13}\text{C}$  NMR (100 MHz,  $\text{CDCl}_3$ )  $\delta$  147.6, 129.8, 127.1, 120.7, 115.0, 109.0, 33.9, 17.5, -1.0;

IR (neat)  $\text{cm}^{-1}$  2953, 1605, 1509, 1250, 843;

HRMS (ESI-TOF,  $m/z$ ) calcd for  $\text{C}_{14}\text{H}_{28}\text{NSi}_2$  ( $\text{M}+\text{H}$ ) $^+$ : 266.1755, found 266.1754.

### **Spectral Data of 1c**

$^1\text{H}$  NMR (400 MHz,  $\text{CDCl}_3$ )  $\delta$  7.10-7.06 (m, 2H), 7.00-6.98 (m, 1H), 6.79 (td,  $J_1 = 8.4$  Hz,  $J_2 = 1.2$  Hz, 1H), 2.90 (s, 3H), 2.64 (s, 1H), 2.29 (s, 3H), 0.12 (s, 18H);

$^{13}\text{C}$  NMR (100 MHz,  $\text{CDCl}_3$ )  $\delta$  154.2, 131.7, 129.7, 126.0, 120.3, 119.4, 46.6, 42.1, 20.3, 1.3;

IR (neat)  $\text{cm}^{-1}$  2951, 2897, 1596, 1490, 1249, 838, 756;

HRMS (ESI-TOF,  $m/z$ ) calcd for  $\text{C}_{15}\text{H}_{30}\text{NSi}_2$  ( $\text{M}+\text{H}$ ) $^+$ : 280.1911, found 280.1910.

### ***Preparation of 1d***

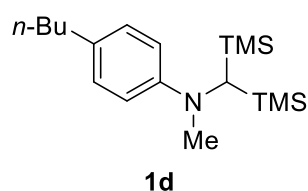

According to the General Procedure A, 1-bromo-4-butylbenzene (**S1d**, 326 mg, 1.56 mmol) was converted to corresponding **5d** (302 mg, 63 % yield) as a colorless liquid. Then **5d** (308 mg, 1 mmol) was converted to **1d** (196 mg, 61 % yield) as a colorless liquid.

### **Spectral Data of 5d**

$^1\text{H}$  NMR (400 MHz,  $\text{CDCl}_3$ )  $\delta$  6.92 (d,  $J = 8.4$  Hz, 2H), 6.46 (d,  $J = 8.4$  Hz, 2H), 3.17 (s, 1H), 2.48 (t,  $J = 8.0$  Hz, 2H), 2.36 (s, 1H), 1.58-1.51 (m, 2H), 1.39-1.30 (m, 2H), 0.92 (t,  $J = 7.2$  Hz, 3H), 0.06 (s, 18H);

$^{13}\text{C}$  NMR (100 MHz,  $\text{CDCl}_3$ )  $\delta$  148.3, 130.1, 128.9, 112.4, 34.8, 34.6, 34.1, 22.5, 14.1, -0.9;

IR (neat)  $\text{cm}^{-1}$  2955, 1614, 1514, 1313, 1251, 844;

HRMS (ESI-TOF,  $m/z$ ) calcd for  $\text{C}_{17}\text{H}_{34}\text{NSi}_2$  ( $\text{M}+\text{H}$ ) $^+$ : 308.2224, found 308.2217.

### **Spectral Data of 1d**

$^1\text{H}$  NMR (400 MHz,  $\text{CDCl}_3$ )  $\delta$  6.99 (d,  $J = 8.8$  Hz, 2H), 6.55 (d,  $J = 8.8$  Hz, 2H), 2.93 (s, 3H), 2.87 (s, 1H), 2.49 (t,  $J = 7.6$  Hz, 2H), 1.59-1.52 (m, 2H), 1.40-1.30 (m, 2H), 0.92 (t,  $J = 7.2$  Hz, 3H), 0.10 (s, 18H);

$^{13}\text{C}$  NMR (100 MHz,  $\text{CDCl}_3$ )  $\delta$  149.0, 128.8, 128.4, 111.1, 43.7, 39.0, 34.6, 34.1, 22.6, 14.1, 0.7;

IR (neat)  $\text{cm}^{-1}$  2954, 1614, 1686, 1515, 1350, 1250, 1015, 839, 767;

HRMS (ESI-TOF,  $m/z$ ) calcd for  $\text{C}_{18}\text{H}_{36}\text{NSi}_2$  ( $\text{M}+\text{H}$ ) $^+$ : 322.2381, found 322.2381.

### ***Preparation of 1e***

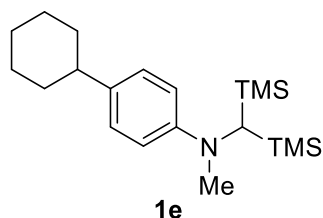

According to the General Procedure A, 1-bromo-4-cyclohexylbenzene (**S1e**, 373 mg, 1.56 mmol) was converted to corresponding **5e** (224 mg, 43 % yield, mp: 29.5-32 °C) as a white solid. Then **5e** (334 mg, 1 mmol) was converted to **1e** (174 mg, 50 % yield, mp: 52.5-55 °C) as a white solid.

### **Spectral Data of 5e**

$^1\text{H}$  NMR (400 MHz,  $\text{CDCl}_3$ )  $\delta$  6.95 (d,  $J = 8.4$  Hz, 2H), 6.47 (d,  $J = 8.4$  Hz, 2H), 3.16 (s, 1H), 2.40-2.30 (m, 2H), 1.86-1.70 (m, 5H), 1.38-1.22 (m, 5H), 0.06 (s, 18H);

$^{13}\text{C}$  NMR (100 MHz,  $\text{CDCl}_3$ )  $\delta$  148.3, 135.5, 127.2, 112.3, 43.5, 34.8, 34.6, 27.2, 26.4, -0.9;

IR (neat)  $\text{cm}^{-1}$  2923, 1613, 1513, 1250, 843;

HRMS (ESI-TOF,  $m/z$ ) calcd for  $\text{C}_{19}\text{H}_{36}\text{NSi}_2$  ( $\text{M}+\text{H}$ ) $^+$ : 334.2381, found 334.2381.

### **Spectral Data of 1e**



$^1\text{H}$  NMR (400 MHz,  $\text{CDCl}_3$ )  $\delta$  7.02 (d,  $J = 8.4$  Hz, 2H), 6.56 (d,  $J = 8.4$  Hz, 2H), 2.93 (s, 3H), 2.87 (s, 1H), 2.41-2.34 (m, 1H), 1.87-1.70 (m, 5H), 1.42-1.31 (m, 5H), 0.09 (s, 18H);

$^{13}\text{C}$  NMR (100 MHz,  $\text{CDCl}_3$ )  $\delta$  149.2, 133.8, 127.1, 111.1, 43.7, 43.3, 39.0, 34.8, 27.2, 26.4, 0.7;

IR (neat)  $\text{cm}^{-1}$  2922, 2850, 1613, 1514, 1350, 1249, 1015, 837, 803, 765;

HRMS (ESI-TOF,  $m/z$ ) calcd for  $\text{C}_{20}\text{H}_{38}\text{NSi}_2$  ( $\text{M}+\text{H}$ ) $^+$ : 348.2537, found 348.2531.

### ***Preparation of 1f***

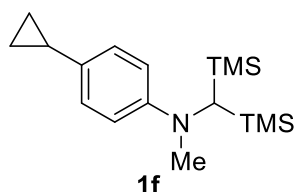

According to the General Procedure A, 1-bromo-4-cyclopropylbenzene (**S1f**, 308 mg, 1.56 mmol) was converted to corresponding **5f** (250 mg, 55 % yield, mp: 41-45 °C) as a white solid. Then **5f** (292 mg, 1 mmol) was converted to **1f** (217 mg, 71 % yield) as a colorless liquid.

### **Spectral Data of 5f**

$^1\text{H}$  NMR(400 MHz,  $\text{CDCl}_3$ )  $\delta$  6.87 (d,  $J = 8.4$  Hz, 2H), 6.46 (d,  $J = 8.4$  Hz, 2H), 3.19 (d,  $J = 9.6$  Hz, 1H), 2.36 (s,  $J = 9.6$  Hz, 1H), 1.82-1.75 (m, 1H), 0.86-0.81 (m, 2H), 0.60-0.56 (m, 2H), 0.07 (s, 18H);

$^{13}\text{C}$  NMR (100 MHz,  $\text{CDCl}_3$ )  $\delta$  148.2, 130.6, 126.7, 112.3, 34.5, 14.6, 8.1, -0.9;

IR (neat)  $\text{cm}^{-1}$  2953, 1615, 1515, 1250, 842, 751;

HRMS (ESI-TOF,  $m/z$ ) calcd for  $\text{C}_{16}\text{H}_{32}\text{NSi}_2$  ( $\text{M}+\text{H}$ ) $^+$ : 294.2068, found 294.2065.

### **Spectral Data of 1f**

$^1\text{H}$  NMR (400 MHz,  $\text{CDCl}_3$ )  $\delta$  6.92 (d,  $J = 8.4$  Hz, 2H), 6.54 (d,  $J = 8.4$  Hz, 2H), 2.93 (s, 3H), 2.85 (s, 1H), 1.83-1.76 (m, 1H), 0.85-0.80 (m, 2H), 0.60-0.56 (m, 2H), 0.09 (s,

18H);

$^{13}\text{C}$  NMR (100 MHz,  $\text{CDCl}_3$ )  $\delta$  149.0, 128.9, 126.6, 111.2, 43.6, 39.0, 14.4, 8.1, 0.7;

IR (neat)  $\text{cm}^{-1}$  3004, 2953, 2895, 1679, 1614, 1518, 1338, 1251, 1115, 842;

HRMS (ESI-TOF,  $m/z$ ) calcd for  $\text{C}_{17}\text{H}_{32}\text{NSi}_2$  ( $\text{M}+\text{H}$ ) $^+$ : 306.2068, found 306.2075.

### ***Preparation of 1g***

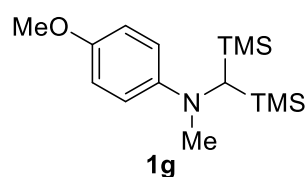

According to the General Procedure A, 1-bromo-4-methoxybenzene (**S1g**, 292 mg, 1.56 mmol) was converted to corresponding **5g** (299 mg, 68 % yield, mp: 37.5-43 °C) as a white solid. Then **5g** (282 mg, 1 mmol) was converted to **1g** (142 mg, 48 % yield) as a colorless liquid.

### **Spectral Data of 5g**

$^1\text{H}$  NMR (400 MHz,  $\text{CDCl}_3$ )  $\delta$  6.73 (d,  $J = 8.8$  Hz, 2H), 6.49 (d,  $J = 8.8$  Hz, 2H), 3.74 (s, 3H), 3.04 (s, 1H), 2.29 (s, 1H), 0.06 (s, 18H);

$^{13}\text{C}$  NMR (100 MHz,  $\text{CDCl}_3$ )  $\delta$  150.9, 144.9, 114.8, 113.3, 55.9, 35.2, -0.9;

IR (neat)  $\text{cm}^{-1}$  3408, 2951, 1507, 1247, 1044, 839, 762;

HRMS (ESI-TOF,  $m/z$ ) calcd for  $\text{C}_{14}\text{H}_{28}\text{NOSi}_2$  ( $\text{M}+\text{H}$ ) $^+$ : 282.1704, found 282.1704.

### **Spectral Data of 1g**

$^1\text{H}$  NMR (400 MHz,  $\text{CDCl}_3$ )  $\delta$  6.79 (d,  $J = 8.8$  Hz, 2H), 6.56 (d,  $J = 8.8$  Hz, 2H), 3.75 (s, 3H), 2.92 (s, 3H), 2.80 (s, 1H), 0.09 (s, 18H);

$^{13}\text{C}$  NMR (100 MHz,  $\text{CDCl}_3$ )  $\delta$  134.8, 114.8, 113.6, 112.1, 55.9, 44.2, 39.2, 0.7;

IR (neat)  $\text{cm}^{-1}$  2953, 1674, 1512, 1342, 1246, 1112, 1033, 833;

HRMS (ESI-TOF,  $m/z$ ) calcd for  $\text{C}_{15}\text{H}_{30}\text{NOSi}_2$  ( $\text{M}+\text{H}$ ) $^+$ : 296.1860, found 296.1851.

### Preparation of 1h

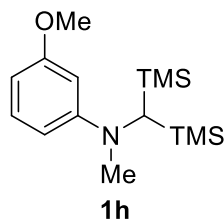

According to the General Procedure A, 1-bromo-3-methoxybenzene (**S1h**, 292 mg, 1.56 mmol) was converted to corresponding **5h** (378 mg, 86 % yield, mp: 54-59 °C) as a white solid. Then **5h** (282 mg, 1 mmol) was converted to **1h** (180.3 mg, 61 % yield) as a colorless liquid.

### Spectral Data of 5h

$^1\text{H}$  NMR (400 MHz,  $\text{CDCl}_3$ )  $\delta$  7.01 (t,  $J = 8.4$  Hz, 1H), 6.15 (tdd,  $J_1 = 7.2$  Hz,  $J_2 = 2.0$  Hz,  $J_3 = 1.2$  Hz, 2H), 6.08 (t,  $J = 2.4$  Hz, 1H), 3.77 (s, 3H), 3.33 (d,  $J = 4.4$  Hz, 1H), 2.38 (s,  $J = 7.2$  Hz, 1H), 0.07 (s, 18H);

$^{13}\text{C}$  NMR (100 MHz,  $\text{CDCl}_3$ )  $\delta$  160.9, 151.6, 129.7, 105.9, 100.6, 98.1, 55.1, 34.4, -1.0;

IR (neat)  $\text{cm}^{-1}$  3408, 2952, 1609, 1505, 1492, 1250, 1208, 1160, 840;

HRMS (ESI-TOF,  $m/z$ ) calcd for  $\text{C}_{14}\text{H}_{28}\text{NOSi}_2$  ( $\text{M}+\text{H}$ ) $^+$ : 282.1704, found 282.1711.

### Spectral Data of 1h

$^1\text{H}$  NMR (400 MHz,  $\text{CDCl}_3$ )  $\delta$  7.11-7.07 (m, 1H), 6.27-6.25 (m, 1H), 6.16-6.14 (m, 2H), 3.79 (s, 3H), 2.94 (s, 3H), 2.87 (s, 1H), 0.10 (s, 18H);

$^{13}\text{C}$  NMR (100 MHz,  $\text{CDCl}_3$ )  $\delta$  160.7, 152.1, 129.6, 104.7, 98.6, 97.8, 55.1, 43.7, 39.0, 0.6;

IR (neat)  $\text{cm}^{-1}$  2952, 2897, 1607, 1572, 1496, 1250, 1167, 839, 764;

HRMS (ESI-TOF,  $m/z$ ) calcd for  $\text{C}_{15}\text{H}_{30}\text{NOSi}_2$  ( $\text{M}+\text{H}$ ) $^+$ : 296.1860, found 296.1855.

### Preparation of 1i

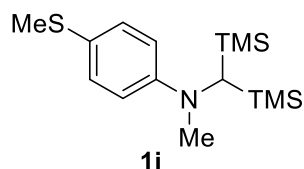

According to the General Procedure A, (4-bromophenyl)(methyl)sulfane (**S1i**, 317 mg, 1.56 mmol) was converted to corresponding **5i** (362 mg, 78 % yield, mp: 47-48.2 °C) as a faint yellow solid. Then **5i** (298 mg, 1 mmol) was converted to **1i** (171 mg, 55 % yield) as a faint yellow liquid.

### **Spectral Data of 5i**

<sup>1</sup>H NMR (400 MHz, CDCl<sub>3</sub>) δ 7.17 (d, *J* = 8.4 Hz, 2H), 6.47 (d, *J* = 8.4 Hz, 2H), 3.35 (s, 1H), 2.40 (s, 3H), 2.38 (s, 1H), 0.06 (s, 18H);

<sup>13</sup>C NMR (100 MHz, CDCl<sub>3</sub>) δ 149.2, 131.9, 121.7, 112.8, 34.5, 19.6, -0.9;

IR (neat) cm<sup>-1</sup> 3412, 2952, 1594, 1495, 1313, 1249, 841, 757;

HRMS (ESI-TOF, *m/z*) calcd for C<sub>14</sub>H<sub>28</sub>NSSi<sub>2</sub> (M+H)<sup>+</sup>: 298.1476 , found 298.1480.

### **Spectral Data of 1i**

<sup>1</sup>H NMR (400 MHz, CDCl<sub>3</sub>) δ 7.23 (d, *J* = 8.8 Hz, 2H), 6.55 (d, *J* = 8.8 Hz, 2H), 2.94 (s, 3H), 2.86 (s, 1H), 2.40 (s, 3H), 0.10 (s, 18H);

<sup>13</sup>C NMR (100 MHz, CDCl<sub>3</sub>) δ 149.7, 132.0, 120.0, 111.6, 43.7, 39.0, 19.7, 0.6;

IR (neat) cm<sup>-1</sup> 2952, 1592, 1498, 1356, 1250, 1201, 840, 801;

HRMS (ESI-TOF, *m/z*) calcd for C<sub>15</sub>H<sub>30</sub>NSSi<sub>2</sub> (M+H)<sup>+</sup>: 312.1632 , found 312.1631.

### ***Preparation of 1j***

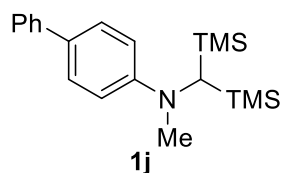

According to the General Procedure A, 4-bromo-1,1'-biphenyl (**S1j**, 364 mg, 1.56 mmol) was converted to corresponding **5j** (245 mg, 48 % yield, mp: 37-42 °C) as a white solid.

Then **5j** (323 mg, 1 mmol) was converted to **1j** (113 mg, 33 % yield, mp: 74-79 °C) as a white solid.

### **Spectral Data of 5j**

<sup>1</sup>H NMR (400 MHz, CDCl<sub>3</sub>) δ 7.45 (d, *J* = 7.2 Hz, 2H), 7.32-7.26 (m, 4H), 7.13 (t, *J* = 7.6 Hz, 1H), 6.51 (d, *J* = 8.4 Hz, 2H), 3.33 (d, *J* = 8.0 Hz, 1H), 2.37 (d, *J* = 8.0 Hz, 1H), 0.00 (s, 18H);

<sup>13</sup>C NMR (100 MHz, CDCl<sub>3</sub>) δ 149.6, 141.4, 128.6, 128.4, 127.8, 126.1, 125.7, 112.5, 34.5, -0.9;

IR (neat) cm<sup>-1</sup> 3418, 3026, 2952, 1610, 1521, 1489, 1250, 844, 760;

HRMS (ESI-TOF, *m/z*) calcd for C<sub>19</sub>H<sub>30</sub>NSi<sub>2</sub> (M+H)<sup>+</sup>: 328.1911 , found 328.1915.

### **Spectral Data of 1j**

<sup>1</sup>H NMR (400 MHz, CDCl<sub>3</sub>) δ 7.57-7.54 (m, 2H), 7.47 (d, *J* = 8.8 Hz, 2H), 7.38 (t, *J* = 8.0 Hz, 2H), 7.22 (t, *J* = 8.0 Hz, 1H), 6.69 (d, *J* = 8.8, 2H), 3.00 (s, 3H), 2.95 (s, 1H), 0.13 (s, 18H);

<sup>13</sup>C NMR (100 MHz, CDCl<sub>3</sub>) δ 150.1, 141.3, 128.6, 127.6, 126.6, 126.0, 125.6, 111.3, 43.7, 39.1, 0.6;

IR (neat) cm<sup>-1</sup> 2953, 2896, 1607, 1522, 1488, 1359, 1251, 1202, 1013, 840, 759;

HRMS (ESI-TOF, *m/z*) calcd for C<sub>20</sub>H<sub>32</sub>NSi<sub>2</sub> (M+H)<sup>+</sup>: 342.2068 , found 342.2063.

### ***Preparation of 1k***

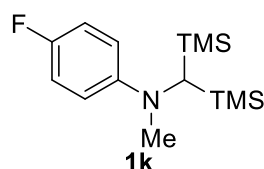

According to the General Procedure A, 1-bromo-4-fluorobenzene (**S1k**, 273 mg, 1.56 mmol) was converted to corresponding **5k** (177 mg, 42 % yield) as a yellow liquid. Then **5k** (270 mg, 1 mmol) was converted to **1k** (94 mg, 33 % yield) as a yellow liquid.

### **Spectral Dates of 5k**

$^1\text{H}$  NMR (400 MHz,  $\text{CDCl}_3$ )  $\delta$  6.83 (t,  $J = 8.8$  Hz, 2H), 6.45 (q,  $J = 4.4$  Hz, 2H), 3.18 (d,  $J = 8.8$  Hz, 1H), 2.31 (d,  $J = 8.8$  Hz, 1H), 0.07 (s, 18H);

$^{13}\text{C}$  NMR (100 MHz,  $\text{CDCl}_3$ )  $\delta$  154.8 (d,  $J = 154.6$  Hz), 146.7, 115.5 (d,  $J = 14.7$  Hz), 112.7 (d,  $J = 4.8$  Hz), 35.2, -1.0;

IR (neat)  $\text{cm}^{-1}$  2954, 1509, 1252, 1226, 842, 764, 751;

HRMS (ESI-TOF,  $m/z$ ) calcd for  $\text{C}_{13}\text{H}_{25}\text{NFSi}_2$  ( $\text{M}+\text{H}$ ) $^+$ : 270.1504, found 270.1504.

### **Spectral Dates of 1k**

$^1\text{H}$  NMR (400 MHz,  $\text{CDCl}_3$ )  $\delta$  6.89 (t,  $J = 9.2$  Hz, 2H), 6.53-6.50 (m, 2H), 2.93 (s, 3H), 2.81 (s, 1H), 0.10 (s, 18H);

$^{13}\text{C}$  NMR (100 MHz,  $\text{CDCl}_3$ )  $\delta$  154.0 (d,  $J = 231.0$  Hz), 147.7 (d,  $J = 1.3$  Hz), 115.3 (d,  $J = 21.7$  Hz), 111.5 (d,  $J = 7.1$  Hz), 44.3, 39.2, 0.6;

IR (neat)  $\text{cm}^{-1}$  2953, 1679, 1511, 1335, 1227, 1115, 981, 837;

HRMS (ESI-TOF,  $m/z$ ) calcd for  $\text{C}_{14}\text{H}_{27}\text{FNSi}_2$  ( $\text{M}+\text{H}$ ) $^+$ : 284.1661, found 284.1657.

### ***Preparation of 1l***

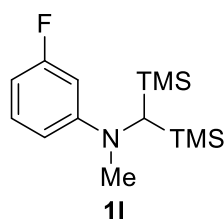

According to the General Procedure A, 1-bromo-3-fluorobenzene (**S1l**, 273 mg, 1.56 mmol) was converted to corresponding **5l** (181 mg, 43 % yield) as a colorless liquid. Then **5l** (270 mg, 1 mmol) was converted to **1l** (136 mg, 48 % yield) as a colorless liquid.

### **Spectral Dates of 5l**

$^1\text{H}$  NMR (400 MHz,  $\text{CDCl}_3$ )  $\delta$  7.04-6.98 (m, 1H), 6.29 (ddd,  $J_1 = 8.0$  Hz,  $J_2 = 2.0$  Hz,

$J_3 = 0.8$  Hz, 1H), 6.26-6.24 (m, 1H), 6.20 (dt,  $J_1 = 12.0$  Hz,  $J_2 = 2.4$  Hz, 1H), 3.44 (d,  $J = 8.0$  Hz, 1H), 2.35 (d,  $J = 8.0$  Hz, 1H), 0.07 (s, 18H);

$^{13}\text{C}$  NMR (100 MHz,  $\text{CDCl}_3$ )  $\delta$  164.4 (d,  $J = 240.2$  Hz), 151.9 (d,  $J = 10.8$  Hz), 130.0 (d,  $J = 10.5$  Hz), 108.4 (d,  $J = 2.0$  Hz), 102.0 (d,  $J = 21.6$  Hz), 98.4 (d,  $J = 25.5$  Hz), 34.7, -1.0;

IR (neat)  $\text{cm}^{-1}$  3428, 2954, 1618, 1587, 1505, 1493, 1251, 1147, 839;

HRMS (ESI-TOF,  $m/z$ ) calcd for  $\text{C}_{13}\text{H}_{25}\text{NFSi}_2$  ( $\text{M}+\text{H}$ ) $^+$ : 270.1504, found 270.1505.

### **Spectral Dates of 1l**

$^1\text{H}$  NMR (400 MHz,  $\text{CDCl}_3$ )  $\delta$  7.09 (dd,  $J_1 = 15.6$  Hz,  $J_2 = 8.4$  Hz, 1H), 6.36 (dd,  $J_1 = 8.4$  Hz,  $J_2 = 2.4$  Hz, 1H), 6.31-6.22 (m, 2H), 2.94 (s, 3H), 2.83 (s, 1H), 0.11 (s, 18H);

$^{13}\text{C}$  NMR (100 MHz,  $\text{CDCl}_3$ )  $\delta$  164.4 (d,  $J = 239.0$  Hz), 152.3 (d,  $J = 10.7$  Hz), 129.9 (d,  $J = 10.6$  Hz), 106.7 (d,  $J = 2.0$  Hz), 100.6 (d,  $J = 21.7$  Hz), 97.8 (d,  $J = 26.2$  Hz), 44.0, 39.0, 0.5;

IR (neat)  $\text{cm}^{-1}$  2954, 2897, 1615, 1575, 1497, 1362, 1251, 1161, 1003, 884, 840;

HRMS (ESI-TOF,  $m/z$ ) calcd for  $\text{C}_{14}\text{H}_{27}\text{FNSi}_2$  ( $\text{M}+\text{H}$ ) $^+$ : 284.1661, found 284.1667.

### ***Preparation of 1m***

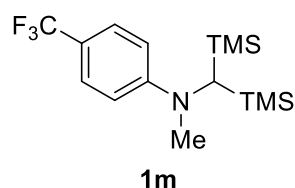

According to the General Procedure A, 1-bromo-4-(trifluoromethyl)benzene (**S1m**, 351 mg, 1.56 mmol) was converted to corresponding **5m** (448 mg, 90 % yield, mp: 44-47 °C) as a white solid. Then **5m** (319 mg, 1 mmol) was converted to **1m** (326 mg, 98 % yield) as a colorless liquid.

### **Spectral Dates of 5m**

$^1\text{H}$  NMR (400 MHz,  $\text{CDCl}_3$ )  $\delta$  7.33 (d,  $J = 8.8$  Hz, 2H), 6.52 (d,  $J = 8.8$  Hz, 2H), 3.68

(d,  $J = 10.0$  Hz, 1H), 2.46 (d,  $J = 10.0$  Hz, 1H), 0.08 (s, 18H);

$^{13}\text{C}$  NMR (100 MHz,  $\text{CDCl}_3$ )  $\delta$  152.2, 126.6 (q,  $J = 2.5$  Hz), 125.3 (q,  $J = 178.9$  Hz), 117.0 (q,  $J = 21.5$  Hz), 111.2, 34.4, -1.1;

IR (neat)  $\text{cm}^{-1}$  3433, 2955, 1614, 1528, 1327, 1279, 1252, 1184, 1158, 1107, 1067, 844, 763;

HRMS (ESI-TOF,  $m/z$ ) calcd for  $\text{C}_{14}\text{H}_{25}\text{F}_3\text{NSi}_2$  ( $\text{M}+\text{H}$ ) $^+$ : 320.1472, found 320.1473.

### **Spectral Dates of 1m**

$^1\text{H}$  NMR (400 MHz,  $\text{CDCl}_3$ )  $\delta$  7.38 (d,  $J = 8.8$  Hz, 2H), 6.52 (d,  $J = 8.8$  Hz, 2H), 2.98 (s, 3H), 2.92 (s, 1H), 0.11 (s, 18H);

$^{13}\text{C}$  NMR (100 MHz,  $\text{CDCl}_3$ )  $\delta$  152.4, 126.4 (q,  $J = 3.6$  Hz), 125.5 (q,  $J = 268.0$  Hz), 115.4 (q,  $J = 32.4$  Hz), 110.1, 44.0, 39.1, 0.5;

IR (neat)  $\text{cm}^{-1}$  2955, 2896, 1613, 1527, 1368, 1330, 1264, 1252, 1200, 1162, 840, 808, 764;

HRMS (ESI-TOF,  $m/z$ ) calcd for  $\text{C}_{15}\text{H}_{27}\text{F}_3\text{NSi}_2$  ( $\text{M}+\text{H}$ ) $^+$ : 334.1629, found 334.1629.

### ***Preparation of 8***

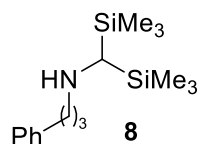

According to the reductive amination of General Procedure A, bis(trimethylsilyl)methylamine **4** (176 mg, 1.0 mmol) and phenylpropyl aldehyde (0.15 mL, 1.2 mmol) was converted to **8** (186.5 mg, 64 % yield) as a colorless thick liquid.

### **Spectral Dates of 8**

$^1\text{H}$  NMR (400 MHz,  $\text{CDCl}_3$ )  $\delta$  7.32-7.28 (m, 2H), 7.22-7.19 (m, 3H), 6.42 (s, 1H), 2.96-2.92 (m, 2H), 2.69 (t,  $J = 7.2$  Hz, 2H), 2.22-2.14 (m, 2H), 2.06 (s, 1H), 0.19 (s, 18H);



$^{13}\text{C}$  NMR (100 MHz,  $\text{CDCl}_3$ )  $\delta$  139.6, 128.8, 128.5, 126.6, 51.4, 41.5, 32.7, 27.4, -0.1;

IR (neat)  $\text{cm}^{-1}$  2955, 2330, 2178, 1604, 1454, 1257, 1118, 1029, 831;

HRMS (ESI-TOF,  $m/z$ ) calcd for  $\text{C}_{16}\text{H}_{32}\text{NSi}_2$  ( $\text{M}+\text{H}$ ) $^+$ : 294.2068, found 294.2077.

### 2.3. Synthesis of Homo-Diaddition Products 2 and 7

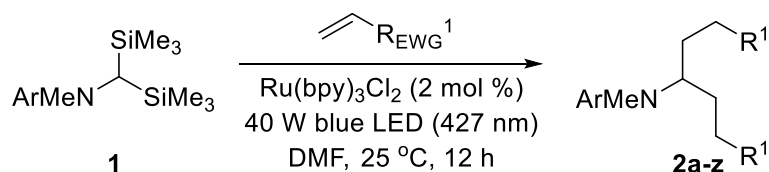

**General Procedure B (alkenes were added after deoxygenation of DMF).** A dried 15 mL Schlenk seal tube was charged with Ru(bpy)<sub>3</sub>Cl<sub>2</sub> (1.3 mg, 0.002mmol) and sealed with rubber plug in Standard Glovebox. Geminal bis(silyl) aryl amines **1** (0.1 mmol) and DMF (2 mL) was added into the tube at 25 °C under positive argon pressure. The solution was allowed to purge with high purity argon gas using a 15 cm syringe needle for at least 10 mins at 25 °C before adding alkene (0.5 mmol) using syringe under positive argon pressure. The rubber plug was changed to polytetrafluoroethylene seal plug under positive argon pressure. The resulting mixture was stirred for 12 h under irradiation with 427 nm blue LED. The reaction was concentrated in vacuo and purified using silica gel chromatography (gradient eluent: petroleum ether/EtOAc = 50:1→10:1) to afford **2**.

**General procedure C (alkenes were added before deoxygenation of DMF).** A dried 15 mL Schlenk seal tube was charged with Ru(bpy)<sub>3</sub>Cl<sub>2</sub> (1.3 mg, 0.002mmol) and sealed with rubber plug in Standard Glovebox. Geminal bis(silyl) aryl amines **1** (0.1 mmol), alkenes (0.5 mmol) and DMF (2 mL) was added into the tube at 25 °C under positive argon pressure. The solution was allowed to purge with high purity argon gas using a 15 cm syringe needle for at least 10 mins at 25 °C. The rubber plug was changed to polytetrafluoroethylene seal plug under positive argon pressure. The solution was stirred for 12 h under irradiation with 427 nm blue LED. The reaction was concentrated

in vacuo and purified using silica gel chromatography (gradient eluent: petroleum ether/EtOAc = 50:1→10:1) to afford **2**.

### ***Preparation of 2a***

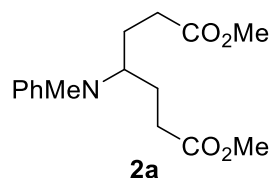

According to the General Procedure B, **1a** (27 mg, 0.1 mmol) and methyl acrylate (46  $\mu$ L, 0.5 mmol) were converted to corresponding products **2a** (25 mg, 85 % yield) as a colorless liquid.

### **Spectral Data of 2a**

$^1\text{H}$  NMR (400 MHz,  $\text{CDCl}_3$ )  $\delta$  7.19 (dd,  $J_1 = 8.4$  Hz,  $J_2 = 7.2$  Hz, 2H), 6.74 (d,  $J = 8.4$  Hz, 2H), 6.67 (t,  $J = 7.2$  Hz, 1H), 4.00-3.93 (m, 1H), 3.58 (s, 6H), 2.67 (s, 3H), 2.28-2.24 (m, 4H), 1.94-1.79 (m, 4H);

$^{13}\text{C}$  NMR (100 MHz,  $\text{CDCl}_3$ )  $\delta$  173.8, 150.9, 129.2, 116.7, 112.7, 56.5, 51.6, 31.0, 29.4, 28.1;

IR (neat)  $\text{cm}^{-1}$  2951, 1733, 1598, 1504, 1436, 1196, 1170, 1104;

HRMS (ESI-TOF,  $m/z$ ) calcd for  $\text{C}_{16}\text{H}_{23}\text{NNaO}_4$  ( $\text{M}+\text{Na}$ ) $^+$ : 316.1519, found 316.1527.

### ***Preparation of 2b***

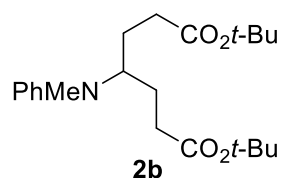

According to the General Procedure B, **1a** (27 mg, 0.1 mmol) and *tert*-butyl acrylate (74  $\mu$ L, 0.5 mmol) were converted to corresponding products **2b** (17 mg, 45 % yield) as a colorless liquid.

### **Spectral Data of 2b**

$^1\text{H}$  NMR (400 MHz,  $\text{CDCl}_3$ )  $\delta$  7.18 (dd,  $J_1 = 8.0$  Hz,  $J_2 = 7.2$  Hz, 2H), 6.74 (d,  $J = 8.0$  Hz, 2H), 6.66 (t,  $J = 7.2$  Hz, 1H), 4.00-3.89 (m, 1H), 2.67 (s, 3H), 2.17 (t,  $J = 7.6$  Hz, 4H), 1.88-1.73 (m, 4H), 1.38 (s, 18H);

$^{13}\text{C}$  NMR (100 MHz,  $\text{CDCl}_3$ )  $\delta$  172.9, 151.1, 129.2, 116.4, 112.8, 80.3, 56.8, 32.5, 29.5, 28.2, 28.1;

IR (neat)  $\text{cm}^{-1}$  2977, 2929, 1725, 1598, 1505, 1366, 1249, 1147, 849;

HRMS (ESI-TOF,  $m/z$ ) calcd for  $\text{C}_{22}\text{H}_{35}\text{NNaO}_4$  ( $\text{M}+\text{Na}$ ) $^+$ : 400.2458, found 400.2460.

### ***Preparation of 2c***

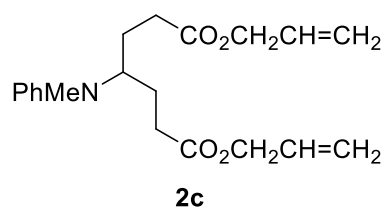

According to the General Procedure B, **1a** (27 mg, 0.1 mmol) and allyl acrylate (61  $\mu\text{L}$ , 0.5 mmol) were converted to corresponding products **2c** (26 mg, 74 % yield) as a colorless liquid.

### **Spectral Data of 2c**

$^1\text{H}$  NMR (400 MHz,  $\text{CDCl}_3$ )  $\delta$  7.18 (t,  $J = 8.0$  Hz, 2H), 6.74 (d,  $J = 8.0$  Hz, 2H), 6.67 (t,  $J = 7.2$  Hz, 1H), 5.87-5.77 (m, 2H), 5.27-5.18 (m, 4H), 4.49 (d,  $J = 5.6$  Hz, 4H), 4.02-3.95 (m, 1H), 2.68 (s, 3H), 2.29 (t,  $J = 7.2$  Hz, 4H), 1.96-1.80 (m, 4H);

$^{13}\text{C}$  NMR (100 MHz,  $\text{CDCl}_3$ )  $\delta$  173.0, 150.9, 132.2, 129.3, 118.3, 116.7, 112.8, 65.2, 56.6, 31.2, 29.5, 28.1;

IR (neat)  $\text{cm}^{-1}$  2931, 1730, 1597, 1504, 1168, 1103, 988, 924;

HRMS (ESI-TOF,  $m/z$ ) calcd for  $\text{C}_{20}\text{H}_{27}\text{NNaO}_4$  ( $\text{M}+\text{Na}$ ) $^+$ : 368.1832, found 368.1840.

### ***Preparation of 2d***

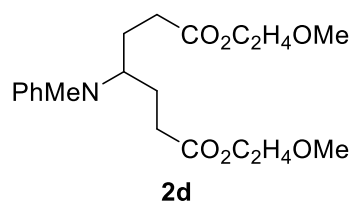

According to the General Procedure B, **1a** (27 mg, 0.1 mmol) and 2-methoxyethyl acrylate (65  $\mu$ L, 0.5 mmol) were converted to corresponding products **2d** (32 mg, 83 % yield) as a colorless liquid.

### **Spectral Data of 2d**

$^1\text{H}$  NMR (400 MHz,  $\text{CDCl}_3$ )  $\delta$  7.17 (dd,  $J_1 = 8.8$  Hz,  $J_2 = 7.2$  Hz, 2H), 6.73 (d,  $J = 8.8$  Hz, 2H), 6.66 (t,  $J = 7.2$  Hz, 1H), 4.13 (t,  $J = 4.8$  Hz, 4H), 4.01-3.94 (m, 1H), 3.47 (t,  $J = 4.8$  Hz, 4H), 3.32 (s, 6H), 2.66 (s, 3H), 2.29 (t,  $J = 8.0$  Hz, 4H), 1.95-1.78 (m, 4H);

$^{13}\text{C}$  NMR (100 MHz,  $\text{CDCl}_3$ )  $\delta$  173.4, 150.1, 129.2, 116.6, 112.7, 70.4, 63.4, 59.0, 56.5, 31.2, 29.5, 28.0;

IR (neat)  $\text{cm}^{-1}$  2927, 2885, 2817, 1729, 1597, 1504, 1452, 1322, 1248, 1197, 1172, 1127, 1100, 1032, 864;

HRMS (ESI-TOF,  $m/z$ ) calcd for  $\text{C}_{20}\text{H}_{31}\text{NNaO}_6$  ( $\text{M}+\text{Na}$ ) $^+$ : 404.2044, found 404.2061.

### ***Preparation of 2e***

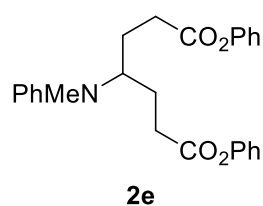

According to the General Procedure B, **1a** (27 mg, 0.1 mmol) and 2-phenoxyethyl acrylate (70  $\mu$ L, 0.5 mmol) were converted to corresponding products **2e** (34 mg, 80 % yield) as a colorless liquid.

### **Spectral Data of 2e**

$^1\text{H}$  NMR (400 MHz,  $\text{CDCl}_3$ )  $\delta$  7.32 (t,  $J = 8.0$  Hz, 4H), 7.21 (dt,  $J_1 = 20.8$  Hz,  $J_2 = 8.0$  Hz, 4H), 6.93 (d,  $J = 8.0$  Hz, 4H), 6.84 (d,  $J = 8.0$  Hz, 2H), 6.73 (t,  $J = 7.2$  Hz, 1H),

4.20-4.12 (m, 1H), 2.74 (s, 3H), 2.56-2.52 (m, 4H), 2.08-1.93 (m, 4H);

$^{13}\text{C}$  NMR (100 MHz,  $\text{CDCl}_3$ )  $\delta$  171.9, 150.9, 150.6, 129.5, 129.4, 125.8, 121.6, 117.0, 112.9, 56.5, 31.3, 29.6, 27.9;

IR (neat)  $\text{cm}^{-1}$  2926, 1753, 1596, 1193, 1162, 1131;

HRMS (ESI-TOF,  $m/z$ ) calcd for  $\text{C}_{26}\text{H}_{27}\text{NNaO}_4$  ( $\text{M}+\text{Na}$ ) $^+$ : 440.1832, found 440.1843.

### ***Preparation of 2f***

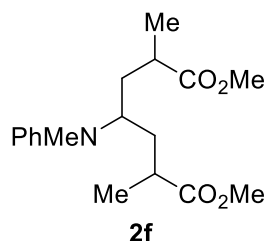

According to the General Procedure B, **1a** (27 mg, 0.1 mmol) and methyl methacrylate (54  $\mu\text{L}$ , 0.5 mmol) were converted to corresponding products **2f** (19.9 mg, 61 % yield,  $dr = 3:2:1$ ) as a colorless liquid.

### **Spectral Data of 2f**

$^1\text{H}$  NMR (400 MHz,  $\text{CDCl}_3$ )  $\delta$  7.20 (dd,  $J_1 = 8.4$  Hz,  $J_2 = 7.2$  Hz, 2H), 6.76 (d,  $J = 8.4$  Hz, 2H), 6.68 (t,  $J = 7.2$  Hz, 1H), 4.00-3.93 (m, 1H), 3.54 (s, 6H), 2.64 (s, 3H), 2.46-2.36 (m, 2H), 2.08-2.01 (m, 2H), 1.51-1.44 (m, 2H), 1.12 (s, 3H), 1.10 (s, 3H);

$^{13}\text{C}$  NMR (100 MHz,  $\text{CDCl}_3$ )  $\delta$  176.9, 150.4, 129.2, 116.7, 112.8, 53.7, 51.6, 36.8, 36.8, 29.8, 17.4;

IR (neat)  $\text{cm}^{-1}$  2924, 1734, 1598, 1504, 1275, 1261, 1167, 750;

HRMS (ESI-TOF,  $m/z$ ) calcd for  $\text{C}_{18}\text{H}_{27}\text{NNaO}_4$  ( $\text{M}+\text{Na}$ ) $^+$ : 344.1832, found 344.1835.

### ***Preparation of 2g***

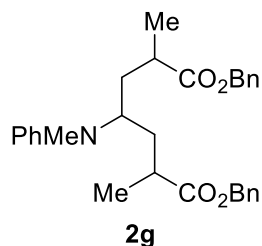

According to the General Procedure B, **1a** (27 mg, 0.1 mmol) and benzyl methacrylate (86  $\mu$ L, 0.5 mmol) were converted to corresponding products **2g** (31 mg, 64 % yield, dr = 5.5:1) as a colorless liquid.

### **Spectral Data of 2g**

$^1\text{H}$  NMR (400 MHz,  $\text{CDCl}_3$ )  $\delta$  7.33-7.08 (m, 12H), 6.72-6.62 (m, 3H), 5.07-4.82 (m, 4H), 4.15-4.05 (m, 1H), 2.65-2.62 (m, 3H), 2.49-2.37 (m, 2H), 2.14-2.05 (m, 1H), 1.94-1.85 (m, 1H), 1.65-1.55 (m, 1H), 1.50-1.44 (m, 1H), 1.16-1.12 (m, 6H);

$^{13}\text{C}$  NMR (100 MHz,  $\text{CDCl}_3$ )  $\delta$  176.3, 176.3, 176.3, 150.6, 150.5, 136.1, 136.0, 136.0, 129.2, 129.2, 128.5, 128.5, 128.3, 128.3, 128.2, 128.2, 128.1, 116.7, 116.6, 112.8, 112.7, 66.3, 66.2, 54.2, 54.0, 37.2, 37.1, 37.0, 36.5, 36.4, 36.3, 29.9, 29.7, 18.6, 18.2, 17.6;

IR (neat)  $\text{cm}^{-1}$  2971, 1729, 1597, 1504, 1276, 1260, 1163, 764;

HRMS (ESI-TOF,  $m/z$ ) calcd for  $\text{C}_{30}\text{H}_{35}\text{NNaO}_4$  ( $\text{M}+\text{Na}$ ) $^+$ : 496.2458 , found 496.2463.

### ***Preparation of 2h***

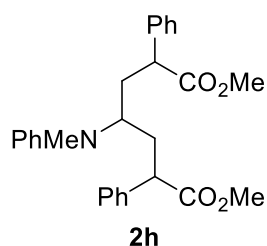

According to the General Procedure C, **1a** (27 mg, 0.1 mmol) and methyl 2-phenylacrylate (83 mg, 0.5 mmol, which was prepared according to the procedure described by Loh and coworkers.<sup>2</sup>) were converted to corresponding products **2h** (41.4

<sup>2</sup> B. Jiang, M. zhao, S. S. Li, Y. H. Xu, T. P. Loh, *Angew. Chem. Int. Ed.*, 2018, **57**, 555.

mg, 91 % yield, dr = 1.8:1:1) as a colorless liquid.

### **Spectral Data of 2h**

$^1\text{H}$  NMR (400 MHz,  $\text{CDCl}_3$ )  $\delta$  7.31-7.22 (m, 10H), 7.14 (dd,  $J_1 = 8.8$  Hz,  $J_2 = 7.2$  Hz, 2H), 6.67 (t,  $J = 7.2$  Hz, 1H), 6.52 (d,  $J = 8.8$  Hz, 2H), 4.06-4.00 (m, 1H), 3.55-3.51 (m, 8H), 2.62 (s, 3H), 2.42-2.35 (m, 2H), 1.91-1.84 (m, 2H);

$^{13}\text{C}$  NMR (100 MHz,  $\text{CDCl}_3$ )  $\delta$  174.0, 150.4, 139.3, 129.1, 128.8, 127.8, 127.4, 116.8, 112.8, 54.1, 52.0, 48.2, 37.2, 29.8;

IR (neat)  $\text{cm}^{-1}$  3028, 2950, 2923, 1730, 1597, 1504, 1454, 1434, 1356, 1253, 1210, 1162;

HRMS (ESI-TOF,  $m/z$ ) calcd for  $\text{C}_{28}\text{H}_{31}\text{NNaO}_4$  ( $\text{M}+\text{Na}$ ) $^+$ : 468.2145, found 468.2153.

### ***Preparation of 2i***

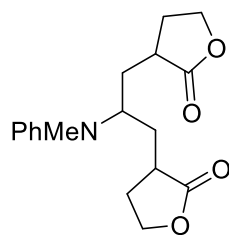

**2i**

According to the General Procedure B, **1a** (27 mg, 0.1 mmol) and 3-methylenedihydrofuran-2(3H)-one (45  $\mu\text{L}$ , 0.5 mmol) were converted to corresponding products **2i** (33 mg, 95 % yield, dr = 2.5:1.4:1) as a colorless semisolid.

### **Spectral Data of 2i**

$^1\text{H}$  NMR (400 MHz,  $\text{CDCl}_3$ )  $\delta$  7.23 (dd,  $J_1 = 8.0$  Hz,  $J_2 = 7.2$  Hz, 2H), 6.88 (d,  $J = 8.0$  Hz, 2H), 6.72 (t,  $J = 7.2$  Hz, 1H), 4.51-4.44 (m, 1H), 4.32-4.24 (m, 2H), 4.13-3.97 (m, 2H), 2.74 (s, 3H), 2.62-2.53 (m, 1H), 2.37-2.27 (m, 3H), 2.18-2.11 (m, 1H), 2.00-1.79 (m, 4H), 1.52-1.43 (m, 1H);

$^{13}\text{C}$  NMR (100 MHz,  $\text{CDCl}_3$ )  $\delta$  179.7, 179.4, 150.6, 129.7, 117.2, 112.6, 66.5, 53.9, 36.8, 36.2, 34.6, 34.0, 29.8, 29.5, 29.2;

IR (neat)  $\text{cm}^{-1}$  2921, 1763, 1597, 1505, 1205, 1159, 1022, 751;

HRMS (ESI-TOF,  $m/z$ ) calcd for  $\text{C}_{18}\text{H}_{23}\text{NNaO}_4$  ( $\text{M}+\text{Na}$ ) $^+$ : 340.1519, found 340.1519.

### ***Preparation of 2j***

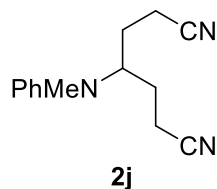

According to the General Procedure B, **1a** (27 mg, 0.1 mmol) and acrylonitrile (34  $\mu\text{L}$ , 0.5 mmol) were converted to corresponding products **2j** (11.6 mg, 50 % yield) as a colorless liquid.

### **Spectral Data of 2j**

$^1\text{H}$  NMR (400 MHz,  $\text{CDCl}_3$ )  $\delta$  7.27 (dd,  $J_1 = 8.8$  Hz,  $J_2 = 7.2$  Hz, 2H), 6.87 (d,  $J = 8.8$  Hz, 2H), 6.80 (t,  $J = 7.2$  Hz, 1H), 4.10-4.03 (m, 1H), 2.71 (s, 3H), 2.36-2.23 (m, 4H), 2.05-1.95 (m, 2H), 1.92-1.83 (m, 2H);

$^{13}\text{C}$  NMR (100 MHz,  $\text{CDCl}_3$ )  $\delta$  150.1, 129.7, 119.2, 118.5, 113.6, 56.7, 29.7, 28.7, 14.6;

IR (neat)  $\text{cm}^{-1}$  2922, 2851, 2246, 1596, 1503, 1314, 1106, 1033, 751;

HRMS (ESI-TOF,  $m/z$ ) calcd for  $\text{C}_{14}\text{H}_{17}\text{N}_3\text{Na}$  ( $\text{M}+\text{Na}$ ) $^+$ : 250.1315, found 250.1307.

### ***Preparation of 2k***

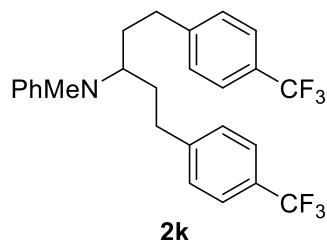

According to the General Procedure B, **1a** (27 mg, 0.1 mmol) and 4-(trifluoromethyl)styrene (75  $\mu\text{L}$ , 0.5 mmol) were converted for 24 h to corresponding products **2k** (32 mg, 68 % yield) as a colorless liquid.

### **Spectral Dates of 2k**



$^1\text{H}$  NMR (400 MHz,  $\text{CDCl}_3$ )  $\delta$  7.48 (d,  $J = 8.0$  Hz, 4H), 7.21-7.14 (m, 6H), 6.70 (t,  $J = 7.2$  Hz, 1H), 6.63 (d,  $J = 8.4$  Hz, 2H), 3.81-3.75 (m, 1H), 2.78 (s, 3H), 2.68-2.54 (m, 4H), 1.98-1.89 (m, 2H), 1.86-1.77 (m, 2H);

$^{13}\text{C}$  NMR (100 MHz,  $\text{CDCl}_3$ )  $\delta$  150.9, 146.0, 129.3, 128.8, 128.4 (q,  $J = 33.0$  Hz), 125.3 (q,  $J = 3.8$  Hz), 124.4 (q,  $J = 270.2$  Hz), 116.7, 112.9, 56.5, 34.6, 32.9, 29.8;

IR (neat)  $\text{cm}^{-1}$  2929, 2860, 1597, 1504, 1323, 1161, 1115, 1067, 1018, 841;

HRMS (ESI-TOF,  $m/z$ ) calcd for  $\text{C}_{26}\text{H}_{26}\text{F}_6\text{N}$  ( $\text{M}+\text{H}$ ) $^+$ : 466.1964, found 466.1964.

### ***Preparation of 2l***

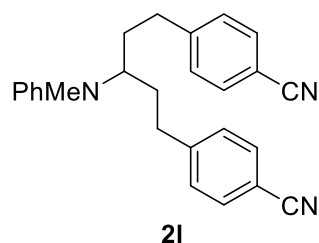

According to the General Procedure C, **1a** (27 mg, 0.1 mmol) and 4-vinylbenzonitrile (65.6 mg, 0.5 mmol, which was prepared according to the procedure described by Gilmour and coworkers<sup>3</sup>) were converted to corresponding products **2l** (27 mg, 71 % yield, mp: 125-129.5 °C) as a white solid.

### **Spectral Data of 2l**

$^1\text{H}$  NMR (400 MHz,  $\text{CDCl}_3$ )  $\delta$  7.51 (d,  $J = 8.4$  Hz, 4H), 7.20 (dd,  $J_1 = 8.0$  Hz,  $J_2 = 7.2$  Hz, 2H), 7.14 (d,  $J = 8.4$  Hz, 4H), 6.72 (t,  $J = 7.2$  Hz, 1H), 6.65 (d,  $J = 8.0$  Hz, 2H), 3.83-3.76 (m, 1H), 2.76 (s, 3H), 2.69-2.53 (m, 4H), 1.98-1.89 (m, 2H), 1.84-1.76 (m, 2H);

$^{13}\text{C}$  NMR (100 MHz,  $\text{CDCl}_3$ )  $\delta$  150.7, 147.5, 132.2, 129.3, 129.2, 119.1, 116.9, 112.9, 109.9, 56.7, 34.5, 33.2, 29.7;

IR (neat)  $\text{cm}^{-1}$  2924, 2856, 2226, 1596, 1503, 1177, 1093, 840, 822;

3. F. Scheidt, M. Schäfer, J. C. Sarie, C. G. Daniliuc, J. J. Molloy and R. Gilmour, *Angew. Chem. Int. Ed.*, 2018, **57**, 16431.

HRMS (ESI-TOF, m/z) calcd for C<sub>26</sub>H<sub>25</sub>N<sub>3</sub>Na (M+Na)<sup>+</sup>: 402.1941 , found 402.1924.

### ***Preparation of 2m***

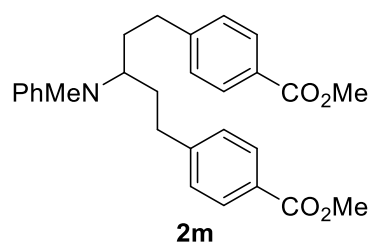

According to the General Procedure C, **1a** (27 mg, 0.1 mmol) and methyl 4-vinylbenzoate (82 mg, 0.5 mmol) were converted to corresponding products **2m** (16 mg, 36 % yield) as a white semisolid.

### **Spectral Data of 2m**

<sup>1</sup>H NMR (400 MHz, CDCl<sub>3</sub>) δ 7.90 (d, *J* = 8.4 Hz, 4H), 7.20 (dd, *J*<sub>1</sub> = 8.8 Hz, *J*<sub>2</sub> = 7.2 Hz, 2H), 7.13 (d, *J* = 8.4 Hz, 4H), 6.72-6.66 (m, 3H), 3.90 (s, 6H), 3.85-3.78 (m, 1H), 2.78 (s, 3H), 2.68-2.53 (m, 4H), 1.98-1.89 (m, 2H), 1.86-1.78 (m, 2H);

<sup>13</sup>C NMR (100 MHz, CDCl<sub>3</sub>) δ 167.2, 150.9, 147.5, 129.8, 129.3, 128.5, 127.9, 116.5, 112.9, 56.8, 52.1, 34.6, 33.1, 29.8;

IR (neat) cm<sup>-1</sup> 2924, 2854, 1716, 1597, 1504, 1434, 1276, 1178, 1107, 1019;

HRMS (ESI-TOF, m/z) calcd for C<sub>28</sub>H<sub>31</sub>NNaO<sub>4</sub> (M+Na)<sup>+</sup>: 468.2145 , found 468.2157.

### ***Preparation of 2o***

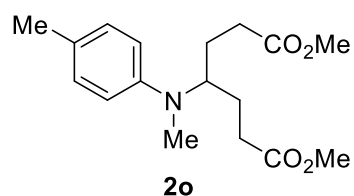

According to the General Procedure B, **1b** (28 mg, 0.1 mmol) and methyl acrylate (45 μL, 0.5 mmol) were converted to corresponding products **2o** (25 mg, 81 % yield) as a colorless liquid.

### **Spectral Data of 2o**

$^1\text{H}$  NMR (400 MHz,  $\text{CDCl}_3$ )  $\delta$  7.00 (d,  $J = 8.4$  Hz, 2H), 6.65 (d,  $J = 8.4$  Hz, 2H), 3.93-3.86 (m, 1H), 3.59 (s, 6H), 2.65 (s, 3H), 2.28-2.21 (m, 7H), 1.93-1.77 (m, 4H);

$^{13}\text{C}$  NMR (100 MHz,  $\text{CDCl}_3$ )  $\delta$  173.9, 148.9, 129.7, 125.8, 113.0, 57.0, 51.6, 31.1, 29.6, 28.0, 20.2;

IR (neat)  $\text{cm}^{-1}$  2951, 1735, 1617, 1519, 1436, 1196, 1171, 1103, 805;

HRMS (ESI-TOF,  $m/z$ ) calcd for  $\text{C}_{17}\text{H}_{25}\text{NNaO}_4$  ( $\text{M}+\text{Na}$ ) $^+$ : 330.1676, found 330.1674.

### ***Preparation of 2p***

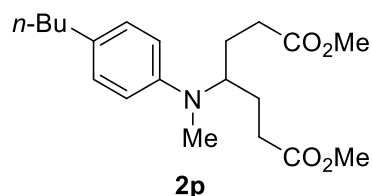

According to the General Procedure B, **1d** (33 mg, 0.1 mmol) and methyl acrylate (46  $\mu\text{L}$ , 0.5 mmol) were converted to corresponding products **2p** (30 mg, 84 % yield) as a colorless liquid.

### **Spectral Data of 2p**

$^1\text{H}$  NMR (400 MHz,  $\text{CDCl}_3$ )  $\delta$  7.00 (d,  $J = 8.8$  Hz, 2H), 6.66 (d,  $J = 8.8$  Hz, 2H), 3.94-3.86 (m, 1H), 3.58 (s, 6H), 2.65 (s, 3H), 2.49 (t,  $J = 7.6$  Hz, 2H), 2.29-2.24 (m, 4H), 1.93-1.77 (m, 4H), 1.58-1.51 (m, 2H), 1.39-1.30 (m, 2H), 0.92 (t,  $J = 7.2$  Hz, 3H);

$^{13}\text{C}$  NMR (100 MHz,  $\text{CDCl}_3$ )  $\delta$  173.9, 149.0, 131.1, 129.1, 112.9, 56.9, 51.6, 34.6, 34.0, 31.1, 29.6, 28.0, 22.5, 14.1;

IR (neat)  $\text{cm}^{-1}$  2953, 2927, 2856, 1733, 1613, 1516, 1436, 1250, 1194, 1169, 1102, 806;

HRMS (ESI-TOF,  $m/z$ ) calcd for  $\text{C}_{20}\text{H}_{31}\text{NNaO}_4$  ( $\text{M}+\text{Na}$ ) $^+$ : 372.2145, found 372.2149.

### ***Preparation of 2q***

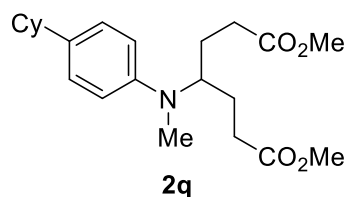

According to the General Procedure B, **1e** (35 mg, 0.1 mmol) and methyl acrylate (45  $\mu$ L, 0.5 mmol) were converted to corresponding products **2q** (29.5 mg, 78 % yield, mp: 54.5-57  $^{\circ}$ C) as a white solid.

### **Spectral Data of 2q**

$^1\text{H}$  NMR (400 MHz,  $\text{CDCl}_3$ )  $\delta$  7.03 (d,  $J = 8.8$  Hz, 2H), 6.67 (d,  $J = 8.8$  Hz, 2H), 3.94-3.87 (m, 1H), 3.58 (s, 6H), 2.65 (s, 3H), 2.41-2.33 (m, 1H), 2.39-2.25 (m, 4H), 1.93-1.77 (m, 8H), 1.72 (d,  $J = 12.4$  Hz, 1H), 1.42-1.31 (m, 4H), 1.27-1.18 (m, 1H);

$^{13}\text{C}$  NMR (100 MHz,  $\text{CDCl}_3$ )  $\delta$  173.9, 149.1, 136.5, 127.4, 113.0, 56.9, 51.5, 43.5, 34.8, 31.2, 29.6, 28.0, 27.1, 26.3;

IR (neat)  $\text{cm}^{-1}$  2922, 2850, 1734, 1612, 1517, 1436, 1251, 1194, 1169, 1103, 811;

HRMS (ESI-TOF,  $m/z$ ) calcd for  $\text{C}_{22}\text{H}_{33}\text{NNaO}_4$  ( $\text{M}+\text{Na}$ ) $^+$ : 398.2302, found 398.2306.

### ***Preparation of 2r***

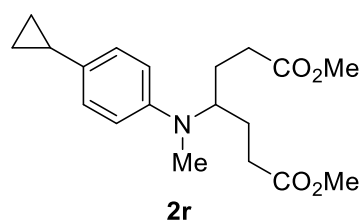

According to the General Procedure B, **1f** (31 mg, 0.1 mmol) and methyl acrylate (46  $\mu$ L, 0.5 mmol) were converted to corresponding products **2r** (26 mg, 77 % yield) as a colorless liquid.

### **Spectral Data of 2r**

$^1\text{H}$  NMR (400 MHz,  $\text{CDCl}_3$ )  $\delta$  6.93 (d,  $J = 8.4$  Hz, 2H), 6.65 (d,  $J = 8.4$  Hz, 2H), 3.92-3.85 (m, 1H), 3.59 (s, 6H), 2.64 (s, 3H), 2.27-2.23 (m, 4H), 1.92-1.76 (m, 5H), 0.87-0.82 (m, 2H), 0.60-0.56 (m, 2H);

$^{13}\text{C}$  NMR (100 MHz,  $\text{CDCl}_3$ )  $\delta$  173.9, 149.0, 131.8, 126.7, 113.0, 57.0, 51.6, 31.1, 29.6, 28.0, 14.4, 8.2;

IR (neat)  $\text{cm}^{-1}$  2999, 2950, 1731, 1615, 1518, 1435, 1250, 1196, 1168, 1018, 811;

HRMS (ESI-TOF,  $m/z$ ) calcd for  $\text{C}_{19}\text{H}_{27}\text{NNaO}_4$  ( $\text{M}+\text{Na}$ ) $^+$ : 356.1832, found 356.1826.

### ***Preparation of 2s***

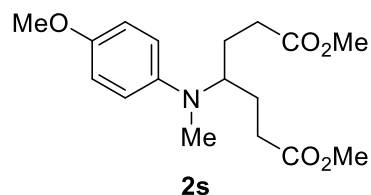

According to the General Procedure B, **1g** (30 mg, 0.1 mmol) and methyl acrylate (40  $\mu\text{L}$ , 0.5 mmol) were converted to corresponding products **2s** (12 mg, 37 % yield, mp: 36.5-39  $^\circ\text{C}$ ) as a white solid.

### **Spectral Data of 2s**

$^1\text{H}$  NMR (400 MHz,  $\text{CDCl}_3$ )  $\delta$  6.79 (d,  $J = 9.2$  Hz, 2H), 6.70 (d,  $J = 9.2$  Hz, 2H), 3.82-3.73 (m, 4H), 3.59 (s, 6H), 2.62 (s, 3H), 2.33-2.21 (m, 4H), 1.92-1.74 (m, 4H);

$^{13}\text{C}$  NMR (100 MHz,  $\text{CDCl}_3$ )  $\delta$  173.9, 151.6, 145.7, 114.7, 114.7, 58.1, 55.8, 51.6, 31.2, 29.9, 27.8;

IR (neat)  $\text{cm}^{-1}$  2950, 1731, 1510, 1436, 1242, 1170, 1103, 1036, 816;

HRMS (ESI-TOF,  $m/z$ ) calcd for  $\text{C}_{17}\text{H}_{25}\text{NNaO}_5$  ( $\text{M}+\text{Na}$ ) $^+$ : 346.1625, found 346.1618.

### ***Preparation of 2t***

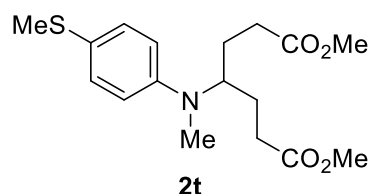

According to the General Procedure B, **1i** (32 mg, 0.1 mmol) and methyl acrylate (46  $\mu\text{L}$ , 0.5 mmol) were converted to corresponding products **2t** (12.4 mg, 36 % yield) as a faint yellow liquid.

### **Spectral Data of 2t**

$^1\text{H}$  NMR (400 MHz,  $\text{CDCl}_3$ )  $\delta$  7.22 (d,  $J = 8.8$  Hz, 2H), 6.68 (d,  $J = 8.8$  Hz, 2H), 3.98-3.97 (m, 1H), 3.58 (s, 6H), 2.66 (s, 3H), 2.41 (s, 3H), 2.24 (t,  $J = 8.0$  Hz, 4H), 1.93-1.78 (m, 4H);

$^{13}\text{C}$  NMR (100 MHz,  $\text{CDCl}_3$ )  $\delta$  173.7, 149.8, 131.4, 123.6, 113.4, 56.7, 51.6, 31.0, 29.6, 28.0, 19.1;

IR (neat)  $\text{cm}^{-1}$  2921, 1731, 1594, 1500, 1485, 1250, 1197, 1170, 1110, 1092, 810;

HRMS (ESI-TOF,  $m/z$ ) calcd for  $\text{C}_{17}\text{H}_{25}\text{NNaO}_4\text{S}$  ( $\text{M}+\text{Na}$ ) $^+$ : 362.1397, found 362.1395.

### ***Preparation of 2u***

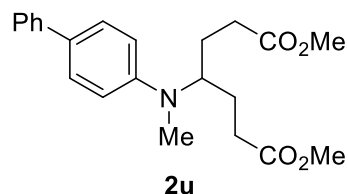

According to the General Procedure B, **1j** (35 mg, 0.1 mmol) and methyl acrylate (46  $\mu\text{L}$ , 0.5 mmol) were converted to corresponding products **2u** (32.3 mg, 85 % yield) as a colorless liquid.

### **Spectral Data of 2u**

$^1\text{H}$  NMR (400 MHz,  $\text{CDCl}_3$ )  $\delta$  7.56-7.53 (m, 2H), 7.47 (d,  $J = 8.8$  Hz, 2H), 7.39 (t,  $J = 7.2$  Hz, 2H), 7.25 (t,  $J = 7.2$  Hz, 1H), 6.81 (d,  $J = 8.8$  Hz, 2H), 4.07-4.00 (m, 1H), 3.59 (s, 6H), 2.73 (s, 3H), 2.29 (t,  $J = 8.0$  Hz, 4H), 1.97-1.82 (m, 4H);

$^{13}\text{C}$  NMR (100 MHz,  $\text{CDCl}_3$ )  $\delta$  173.8, 150.3, 141.1, 129.3, 128.7, 127.8, 126.3, 126.1, 112.9, 56.5, 51.6, 31.0, 29.6, 28.1;

IR (neat)  $\text{cm}^{-1}$  2950, 1734, 1609, 1524, 1488, 1436, 1254, 1201, 1172, 1104, 820, 764;

HRMS (ESI-TOF,  $m/z$ ) calcd for  $\text{C}_{22}\text{H}_{27}\text{NNaO}_4$  ( $\text{M}+\text{Na}$ ) $^+$ : 392.1832, found 392.1833.

### ***Preparation of 2v***

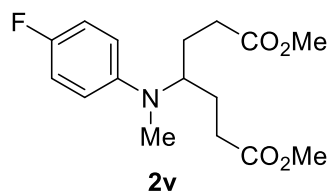

According to the General Procedure B, **1k** (29 mg, 0.1 mmol) and methyl acrylate (40  $\mu$ L, 0.5 mmol) were converted to corresponding products **2v** (15 mg, 48 % yield) as a colorless liquid.

### **Spectral Dates of 2v**

$^1\text{H}$  NMR (400 MHz,  $\text{CDCl}_3$ )  $\delta$  6.89 (dd,  $J_1 = 9.2$  Hz,  $J_2 = 8.4$  Hz, 2H), 6.68-6.64 (m, 2H), 3.89-3.81 (m, 1H), 3.58 (s, 6H), 2.63 (s, 3H), 2.27-2.23 (m, 4H), 1.92-1.76 (m, 4H);

$^{13}\text{C}$  NMR (100 MHz,  $\text{CDCl}_3$ )  $\delta$  173.8, 155.4 (d,  $J = 234.0$  Hz), 147.6 (d,  $J = 1.6$  Hz), 115.5 (d,  $J = 22.0$  Hz), 114.0 (d,  $J = 7.3$  Hz), 57.7, 51.6, 31.1, 29.9, 27.9;

IR (neat)  $\text{cm}^{-1}$  2952, 1730, 1508, 1436, 1226, 1197, 1167, 1103, 815;

HRMS (ESI-TOF,  $m/z$ ) calcd for  $\text{C}_{16}\text{H}_{22}\text{FNNaO}_4$  ( $\text{M}+\text{Na}$ ) $^+$ : 334.1425, found 334.1416.

### ***Preparation of 2w***

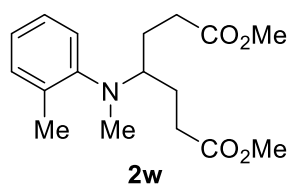

According to the General Procedure B, **1c** (28 mg, 0.1 mmol) and methyl acrylate (45  $\mu$ L, 0.5 mmol) were converted to corresponding products **2w** (18.6 mg, 61 % yield) as a colorless liquid.

### **Spectral Data of 2w**

$^1\text{H}$  NMR (400 MHz,  $\text{CDCl}_3$ )  $\delta$  7.15-7.11 (m, 2H), 7.04 (d,  $J = 7.6$  Hz, 1H), 6.93 (t,  $J = 6.4$  Hz, 1H), 3.63 (s, 6H), 3.07-3.00 (m, 1H), 2.63 (s, 3H), 2.41-2.36 (m, 4H), 2.24 (s, 3H), 1.94-1.76 (m, 4H);

$^{13}\text{C}$  NMR (100 MHz,  $\text{CDCl}_3$ )  $\delta$  174.1, 151.4, 132.3, 131.5, 126.4, 122.7, 121.9, 59.4, 51.6, 33.2, 31.3, 26.0, 19.1;

IR (neat)  $\text{cm}^{-1}$  2951, 1733, 1597, 1492, 1436, 1255, 1196, 1167, 1087, 762;

HRMS (ESI-TOF,  $m/z$ ) calcd for  $\text{C}_{17}\text{H}_{25}\text{NNaO}_4$  ( $\text{M}+\text{Na}$ ) $^+$ : 330.1676, found 330.1674.

### ***Preparation of 2x***

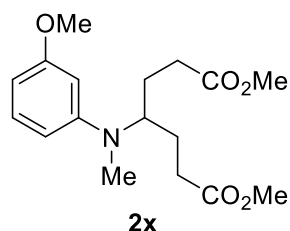

According to the General Procedure B, **1h** (30 mg, 0.1 mmol) and methyl acrylate (45  $\mu\text{L}$ , 0.5 mmol) were converted to corresponding products **2x** (23.3 mg, 71 % yield) as a colorless liquid.

### **Spectral Data of 2x**

$^1\text{H}$  NMR (400 MHz,  $\text{CDCl}_3$ )  $\delta$  7.09 (t,  $J = 8.4$  Hz, 1H), 6.36 (dd,  $J_1 = 8.4$  Hz,  $J_2 = 2.4$  Hz, 1H), 6.29-6.24 (m, 2H), 3.99-3.91 (m, 1H), 3.78 (s, 3H), 3.59 (s, 6H), 2.66 (s, 3H), 2.25 (t,  $J = 8.0$  Hz, 4H), 1.93-1.78 (m, 4H);

$^{13}\text{C}$  NMR (100 MHz,  $\text{CDCl}_3$ )  $\delta$  173.8, 160.8, 152.3, 129.8, 105.8, 101.3, 99.3, 56.5, 55.1, 51.6, 31.0, 29.6, 28.1;

IR (neat)  $\text{cm}^{-1}$  2951, 1730, 1607, 1573, 1497, 1435, 1231, 1197, 1163, 1104, 1052, 990, 825, 751;

HRMS (ESI-TOF,  $m/z$ ) calcd for  $\text{C}_{17}\text{H}_{25}\text{NNaO}_5$  ( $\text{M}+\text{Na}$ ) $^+$ : 346.1625, found 346.1625.

### ***Preparation of 2y***



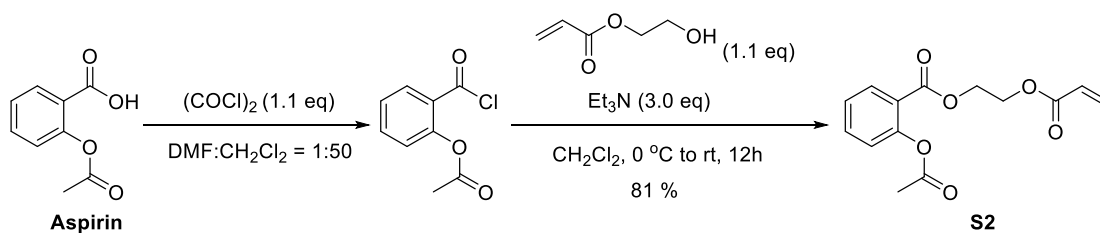

To a solution of aspirin (361 mg, 2.0 mmol) and  $(\text{COCl})_2$  (0.19 mL, 2.2 mmol) in  $\text{CH}_2\text{Cl}_2$  (5 mL) was added DMF (0.1 mL) at 0 °C. After stirring for 5 mins at 0 °C, the reaction was warmed to 25 °C for additional 30 mins. Then the mixture was concentrated in vacuo to afford crude acyl chloride as a white solid.

To a solution of acyl chloride, 2-hydroxyethyl acrylate (0.23 mL, 2.2 mmol) in  $\text{CH}_2\text{Cl}_2$  (5 mL) was added dropwise  $\text{Et}_3\text{N}$  (0.84 mL, 6.0 mmol) at 0 °C. The reaction was stirred for 12 h at 25 °C before quenching with water (5 mL) and extracting with EtOAc ( $3 \times 10$  mL). The combined organic layers were washed with sat. aq. NaCl ( $2 \times 10$  mL), dried over  $\text{MgSO}_4$ , filtered and concentrated in vacuo. The residue was purified by silica gel chromatography (gradient eluent: petroleum ether/EtOAc = 5:1→2:1) to afford **S2** (452 mg, 81 % yield) as a colorless thick liquid.

### **Spectral Data of S2**

$^1\text{H}$  NMR (400 MHz,  $\text{CDCl}_3$ )  $\delta$  8.03 (dd,  $J_1 = 8.0$  Hz,  $J_2 = 1.6$  Hz, 1H), 7.57 (td,  $J_1 = 8.0$  Hz,  $J_2 = 1.6$  Hz, 1H), 7.32 (td,  $J_1 = 7.6$  Hz,  $J_2 = 1.2$  Hz, 1H), 7.11 (dd,  $J_1 = 7.6$  Hz,  $J_2 = 1.2$  Hz, 1H), 6.45 (dd,  $J_1 = 17.6$  Hz,  $J_2 = 1.6$  Hz, 1H), 6.15 (dd,  $J_1 = 17.6$  Hz,  $J_2 = 10.4$  Hz, 1H), 5.87 (dd,  $J_1 = 10.4$  Hz,  $J_2 = 1.6$  Hz, 1H), 4.53-4.50 (m, 2H), 4.48-4.46 (m, 2H), 2.34 (s, 3H);

$^{13}\text{C}$  NMR (100 MHz,  $\text{CDCl}_3$ )  $\delta$  169.7, 166.0, 164.2, 150.9, 134.2, 132.0, 131.6, 128.0, 126.1, 123.9, 122.8, 62.8, 62.2, 21.1;

IR (neat)  $\text{cm}^{-1}$  2960, 1766, 1720, 1607, 1452, 1410, 1368, 1290, 1251, 1182, 1135, 1083, 1068, 915, 809, 752;

HRMS (ESI-TOF,  $m/z$ ) calcd for  $\text{C}_{14}\text{H}_{14}\text{NaO}_6$  ( $\text{M}+\text{Na}$ ) $^+$ : 301.0683, found 301.0680.

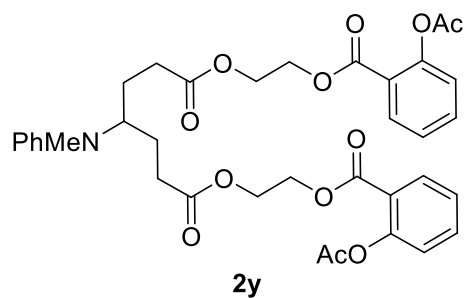

According to the General Procedure C, **1a** (27 mg, 0.1 mmol) and **S2** (85 mg, 0.3 mmol) were converted to corresponding products **2y** (38 mg, 55 % yield) as a colorless semisolid.

### Spectral Data of 2y

$^1\text{H}$  NMR (400 MHz,  $\text{CDCl}_3$ )  $\delta$  7.98 (dd,  $J_1 = 8.0$  Hz,  $J_2 = 1.6$  Hz, 2H), 7.56 (td,  $J_1 = 8.0$  Hz,  $J_2 = 1.6$  Hz, 2H), 7.30 (td,  $J_1 = 7.6$  Hz,  $J_2 = 1.2$  Hz, 2H), 7.16 (dd,  $J_1 = 8.8$  Hz,  $J_2 = 7.2$  Hz, 2H), 7.10 (dd,  $J_1 = 8.0$  Hz,  $J_2 = 0.8$  Hz, 2H), 6.72 (d,  $J = 8.0$  Hz, 2H), 6.65 (t,  $J = 7.2$  Hz, 1H), 4.38-4.35 (m, 4H), 4.28-4.25 (m, 4H), 4.03-3.94 (m, 1H), 2.64 (s, 3H), 2.33-2.26 (m, 10H), 1.94-1.79 (m, 4H);

$^{13}\text{C}$  NMR (100 MHz,  $\text{CDCl}_3$ )  $\delta$  173.1, 169.7, 164.1, 150.8, 150.8, 134.2, 131.9, 129.2, 126.1, 123.9, 123.9, 122.8, 116.8, 112.7, 62.8, 62.1, 56.4, 31.1, 29.4, 28.0, 21.0;

IR (neat)  $\text{cm}^{-1}$  2925, 1766, 1723, 1597, 1504, 1452, 1368, 1292, 1251, 1188, 1041, 1081, 1041, 916, 750;

HRMS (ESI-TOF,  $m/z$ ) calcd for  $\text{C}_{36}\text{H}_{39}\text{NNaO}_{12}$  ( $\text{M}+\text{Na}$ ) $^+$ : 700.2364, found 700.2358.

### *Preparation of 2z*

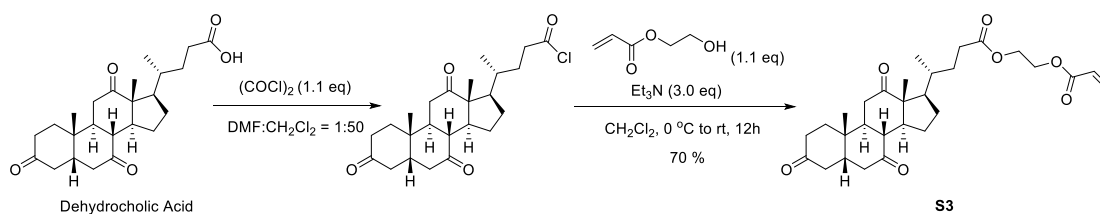

To a solution of dehydrocholic acid (403 mg, 1.0 mmol) and  $(\text{COCl})_2$  (0.1 mL, 1.1 mmol) in  $\text{CH}_2\text{Cl}_2$  (5 mL) was added DMF (0.1 mL) at 0 °C. After stirring for 5 mins at

0 °C, the reaction was warmed to 25 °C for additional 30 mins. Then the reaction was concentrated in vacuo to afford crude acyl chloride as a white solid.

To a solution of acyl chloride, 2-hydroxyethyl acrylate (0.12 mL, 1.1 mmol) in CH<sub>2</sub>Cl<sub>2</sub> (5 mL) was added dropwise Et<sub>3</sub>N (0.42 mL, 3.0 mmol) at 0 °C. The reaction was stirred for 12 h at 25 °C before quenching with water (5 mL) and extracting with EtOAc (3 × 10 mL). The combined organic layers were washed with sat. aq. NaCl (2 × 10 mL), dried over MgSO<sub>4</sub>, filtered and concentrated in vacuo. The residue was purified by silica gel chromatography (gradient eluent: petroleum ether/EtOAc = 5:1→2:1) to afford **S3** (353 mg, 70 % yield, mp: 157.7-159.1 °C) as a white solid.

### **Spectral Data of S3**

<sup>1</sup>H NMR (400 MHz, CDCl<sub>3</sub>) δ 6.42 (dd, *J*<sub>1</sub> = 17.2 Hz, *J*<sub>2</sub> = 1.2 Hz, 1H), 6.13 (dd, *J*<sub>1</sub> = 17.2 Hz, *J*<sub>2</sub> = 10.4 Hz, 1H), 5.85 (dd, *J*<sub>1</sub> = 10.4 Hz, *J*<sub>2</sub> = 1.2 Hz, 1H), 4.36-4.29 (m, 4H), 2.93-2.80 (m, 3H), 2.45-2.18 (m, 8H), 2.14-2.10 (m, 2H), 2.07-1.92 (m, 4H), 1.87-1.79 (m, 2H), 1.60 (td, *J*<sub>1</sub> = 14.0 Hz, *J*<sub>2</sub> = 4.8 Hz, 1H), 1.41-1.24 (m, 7H), 1.05 (s, 3H), 0.83 (d, *J* = 9.6 Hz, 3H);

<sup>13</sup>C NMR (100 MHz, CDCl<sub>3</sub>) δ 211.9, 209.0, 208.7, 173.8, 165.9, 131.4, 128.1, 62.4, 62.0, 57.0, 51.8, 49.1, 46.9, 45.7, 45.6, 45.0, 42.8, 38.7, 36.5, 36.1, 35.5, 35.3, 31.4, 30.4, 27.7, 25.2, 22.0, 18.7, 11.9;

IR (neat) cm<sup>-1</sup> 2961, 2870, 1721, 1699, 1446, 1426, 1409, 1385, 1297, 1275, 1184, 1163, 1077, 810;

HRMS (ESI-TOF, *m/z*) calcd for C<sub>29</sub>H<sub>40</sub>NaO<sub>7</sub> (M+Na)<sup>+</sup>: 523.2666, found 523.2662.

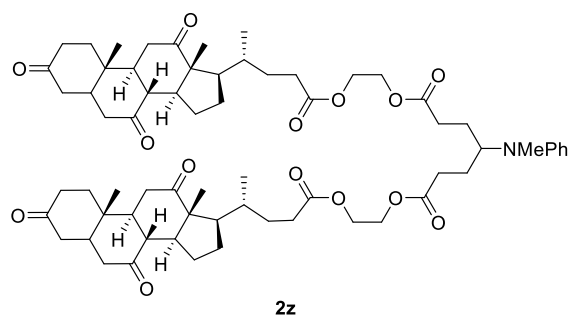

According to the General Procedure C, **1a** (27 mg, 0.1 mmol) and **S3** (115 mg, 0.22

mmol) were converted to corresponding products **2z** (71 mg, 63 % yield, mp: 147.5-150.5 °C) as a white solid.

### **Spectral Data of 2z**

<sup>1</sup>H NMR (400 MHz, CDCl<sub>3</sub>) δ 7.16 (dd,  $J_1 = 8.4$  Hz,  $J_2 = 7.2$  Hz, 2H), 6.71 (d,  $J = 8.4$  Hz, 2H), 6.64 (t,  $J = 7.2$  Hz, 1H), 4.12-4.10 (m, 8H), 4.00-3.92 (m, 1H), 2.93-2.79 (m, 7H), 2.65 (s, 3H), 2.40-2.07 (m, 26 H), 2.02-1.76 (m, 18H), 1.63-1.53 (m, 3H), 1.26-1.23 (m, 8H), 1.03 (s, 6H), 0.81 (d,  $J = 6.8$  Hz, 6H);

<sup>13</sup>C NMR (100 MHz, CDCl<sub>3</sub>) δ 211.9, 209.1, 208.7, 173.7, 173.1, 150.8, 129.2, 116.7, 112.6, 62.2, 61.9, 56.9, 56.4, 51.7, 49.0, 46.8, 45.6, 45.5, 45.0, 42.8, 38.6, 36.5, 36.0, 35.5, 35.3, 31.2, 31.0, 30.3, 29.7, 29.4, 27.9, 27.6, 25.1, 21.9, 18.6, 11.8;

IR (neat) cm<sup>-1</sup> 2924, 1732, 1707, 1597, 1505, 1434, 1381, 1268, 1249, 1162, 1103, 954;

HRMS (ESI-TOF, m/z) calcd for C<sub>66</sub>H<sub>91</sub>NNaO<sub>14</sub> (M+Na)<sup>+</sup>: 1144.6332 , found 1144.6339.

### ***Preparation of 7***

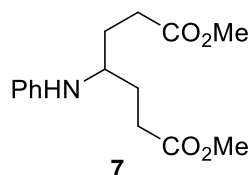

According to the General Procedure B, **5a** (26 mg, 0.1 mmol) and methyl acrylate (46 μL, 0.5 mmol) were converted to corresponding products **7** (19.7 mg, 68 % yield) as a colorless liquid.

### **Spectral Data of 7**

<sup>1</sup>H NMR (400 MHz, CDCl<sub>3</sub>) δ 7.14 (t,  $J = 5.2$  Hz, 2H), 6.66 (t,  $J = 5.2$  Hz, 1H), 6.55 (d,  $J = 5.2$  Hz, 2H), 3.63 (s, 6H), 3.51-3.46 (m, 1H), 3.41 (s, 1H), 2.42 (t,  $J = 5.2$  Hz, 4H), 1.93-1.87 (m, 2H), 1.82-1.76 (m, 2H);

<sup>13</sup>C NMR (100 MHz, CDCl<sub>3</sub>) δ 174.1, 147.6, 129.4, 117.2, 112.9, 52.1, 51.7, 30.7, 30.3.;

IR (neat)  $\text{cm}^{-1}$  3388, 2951, 1730, 1602, 1498, 1436, 1319, 1256, 1195, 1173, 1115, 992, 871;

HRMS (ESI-TOF,  $m/z$ ) calcd for  $\text{C}_{15}\text{H}_{21}\text{NNaO}_4$  ( $\text{M}+\text{Na}$ ) $^+$ : 302.1363, found 302.1366.

#### 2.4. Synthesis of Mono-Addition products **6**

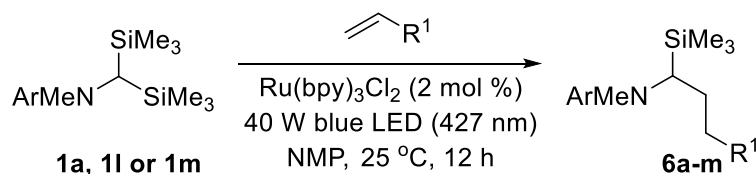

##### **General procedure D (alkenes (0.12 mmol) were added after deoxygenation of NMP).**

A dried 15 mL Schlenk seal tube was charged with  $\text{Ru}(\text{bpy})_3\text{Cl}_2$  (1.3 mg, 0.002 mmol) and sealed with rubber plug in Standard Glovebox. Geminal bis(silyl) aryl amines **1a** (0.1 mmol) and NMP (2 mL) were added into the tube at 25 °C under positive argon pressure. The solution was allowed to purge with high purity argon gas using a 15 cm syringe needle for at least 10 mins at 25 °C and charged with alkene (0.12 mmol) using syringe under positive argon pressure. The rubber plug was changed to polytetrafluoroethylene seal plug under positive argon pressure. The solution was stirred for 12 h under irradiation with 427 nm blue LED. The reaction was quenched with water (5 mL) and extracted with EtOAc ( $3 \times 10$  mL). The combined organic layers were washed with brine ( $3 \times 20$  mL), dried over  $\text{MgSO}_4$ , filtered and concentrated in vacuo. The residue was purified by silica gel chromatography (gradient eluent: petroleum ether/EtOAc = 100:1  $\rightarrow$  20:1) to afford desired products **6a-g**.

##### **General procedure E (alkenes (0.50 mmol) were added after deoxygenation of DMF).**

A dried 15 mL Schlenk seal tube was charged with  $\text{Ru}(\text{bpy})_3\text{Cl}_2$  (1.3 mg, 0.002 mmol) and sealed with rubber plug in Standard Glovebox. Geminal bis(silyl) aryl amines **1a**, **1l** or **1m** (0.1 mmol) and DMF (2 mL) were added into the tube at 25 °C under positive argon pressure. The solution was allowed to purge with high purity argon gas using a 15 cm syringe needle for at least 10 mins at 25 °C and charged with alkene (0.5 mmol) using syringe under positive argon pressure. The rubber plug was changed to polytetrafluoroethylene seal plug under positive argon pressure. The solution was

stirred for 12 h under irradiation with 427 nm blue LED. The reaction was quenched with water (5 mL), extracted with EtOAc (3 × 10 mL). The combined organic layers were washed with brine (3 × 20 mL), dried over MgSO<sub>4</sub>, filtered and concentrated in vacuo. The residue was purified by silica gel chromatography (gradient eluent: petroleum ether/EtOAc = 100:1→20:1) to afford desired products **6h-m**.

### ***Preparation of 6a***

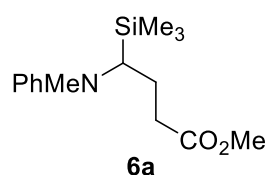

According to the General Procedure D, **1a** (27 mg, 0.1 mmol) and methyl acrylate (11  $\mu$ L, 0.12 mmol) were converted to corresponding product **6a** (17 mg, 60 % yield) as a colorless liquid and by-product **2a** (4.3 mg, 14 % yield).

### **Spectral Data of 6a**

<sup>1</sup>H NMR (400 MHz, CDCl<sub>3</sub>)  $\delta$  7.19 (dd,  $J_1 = 8.8$  Hz,  $J_2 = 7.2$  Hz, 2H), 6.70 (d,  $J = 8.8$  Hz, 2H), 6.62 (t,  $J = 7.2$  Hz, 1H), 3.59 (s, 3H), 3.41 (dd,  $J_1 = 12.4$  Hz,  $J_2 = 3.6$  Hz, 1H), 2.80 (s, 3H), 2.39-2.22 (m, 2H), 2.10-2.00 (m, 1H), 1.93-1.84 (m, 1H), 0.07 (s, 9H);

<sup>13</sup>C NMR (100 MHz, CDCl<sub>3</sub>)  $\delta$  174.2, 151.2, 129.1, 115.4, 111.8, 51.5, 50.0, 34.0, 32.3, 24.0, -1.7;

IR (neat) cm<sup>-1</sup> 2951, 1735, 1596, 1503, 1364, 1249, 1201, 837;

HRMS (ESI-TOF, m/z) calcd for C<sub>15</sub>H<sub>26</sub>NO<sub>2</sub>Si (M+H)<sup>+</sup>: 280.1727, found 280.1725.

### ***Preparation of 6b***

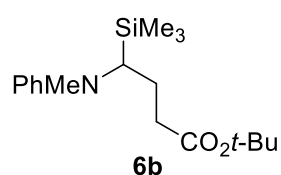

According to the General Procedure D, **1a** (27 mg, 0.1 mmol) and *tert*-butyl acrylate

(18  $\mu$ L, 0.12 mmol) were converted to corresponding product **6b** (16.4 mg, 50 % yield) as a colorless liquid and by-product **2b** (3 mg, 7 % yield).

### Spectral Data of 6b

$^1\text{H}$  NMR (400 MHz,  $\text{CDCl}_3$ )  $\delta$  7.18 (dd,  $J_1 = 8.8$  Hz,  $J_2 = 7.2$  Hz, 2H), 6.70 (d,  $J = 8.8$  Hz, 2H), 6.61 (t,  $J = 7.2$  Hz, 1H), 3.39 (dd,  $J_1 = 12.0$  Hz,  $J_2 = 3.6$  Hz, 1H), 2.79 (s, 3H), 2.30-2.13 (m, 2H), 2.03-1.93 (m, 1H), 1.87-1.79 (m, 1H), 1.40 (s, 9H), 0.05 (s, 9H);

$^{13}\text{C}$  NMR (100 MHz,  $\text{CDCl}_3$ )  $\delta$  173.3, 151.3, 129.1, 115.2, 111.9, 80.2, 50.0, 34.0, 33.4, 28.2, 23.8, -1.6;

IR (neat)  $\text{cm}^{-1}$  2954, 1725, 1596, 1503, 1366, 1250, 1144, 83;

HRMS (ESI-TOF,  $m/z$ ) calcd for  $\text{C}_{18}\text{H}_{32}\text{NO}_2\text{Si}$  ( $\text{M}+\text{H}$ ) $^+$ : 322.2197, found 322.2193.

### *Preparation of 6c*

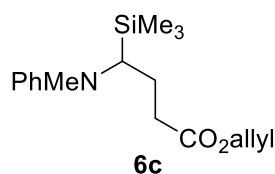

According to the General Procedure D, **1a** (27 mg, 0.1 mmol) and allyl acrylate (15  $\mu$ L, 0.12 mmol) were converted to corresponding product **6c** (16 mg, 51 % yield) as a colorless liquid and by-product **2c** (7 mg, 21 % yield).

### Spectral Data of 6c

$^1\text{H}$  NMR (400 MHz,  $\text{CDCl}_3$ )  $\delta$  7.18 (dd,  $J_1 = 8.8$  Hz,  $J_2 = 7.2$  Hz, 2H), 6.69 (d,  $J = 8.8$  Hz, 2H), 6.61 (t,  $J = 7.2$  Hz, 1H), 5.88-5.78 (m, 1H), 5.25 (dq,  $J_1 = 17.2$  Hz,  $J_2 = 1.6$  Hz, 1H), 5.19 (dq,  $J_1 = 10.4$  Hz,  $J_2 = 1.6$  Hz, 1H), 4.50 (dq,  $J_1 = 5.6$  Hz,  $J_2 = 1.6$  Hz, 2H), 3.41 (dd,  $J_1 = 12.4$  Hz,  $J_2 = 3.6$  Hz, 1H), 2.79 (s, 3H), 2.42-2.24 (m, 2H), 2.10-2.00 (m, 1H), 1.93-1.84 (m, 1H), 0.06 (s, 9H);

$^{13}\text{C}$  NMR (100 MHz,  $\text{CDCl}_3$ )  $\delta$  173.5, 151.2, 132.3, 129.1, 118.3, 115.4, 111.9, 65.1, 50.0, 34.0, 32.4, 24.0, -1.6;

IR (neat)  $\text{cm}^{-1}$  2952, 1733, 1596, 1503, 1371, 1249, 1194, 1144, 987, 836;

HRMS (ESI-TOF,  $m/z$ ) calcd for  $\text{C}_{17}\text{H}_{27}\text{NNaO}_2\text{Si}$  ( $\text{M}+\text{Na}$ ) $^+$ : 328.1703, found 328.1701.

### ***Preparation of 6d***

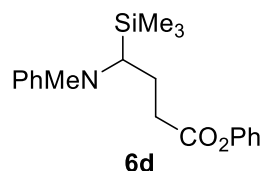

According to the General Procedure D, **1a** (27 mg, 0.1 mmol) and phenyl acrylate (17  $\mu\text{L}$ , 0.12 mmol) were converted to corresponding product **6d** (14 mg, 40 % yield, mp: 59-62  $^{\circ}\text{C}$ ) as a white solid and by-product **2e** (14 mg, 33 % yield).

### **Spectral Data of 6d**

$^1\text{H}$  NMR (400 MHz,  $\text{CDCl}_3$ )  $\delta$  7.34 (t,  $J = 8$  Hz, 2H), 7.23-7.18 (m, 3H), 6.95 (d,  $J = 8.8$  Hz, 2H), 6.75 (d,  $J = 8.0$  Hz, 2H), 6.65 (t,  $J = 7.2$  Hz, 1H), 3.51 (dd,  $J_1 = 12.4$  Hz,  $J_2 = 3.6$  Hz, 1H), 2.83 (s, 3H), 2.66-2.49 (m, 2H), 2.19-2.09 (m, 1H), 2.03-1.95 (m, 1H), 0.08 (s, 9H);

$^{13}\text{C}$  NMR (100 MHz,  $\text{CDCl}_3$ )  $\delta$  172.3, 151.3, 150.8, 129.4, 129.3, 125.8, 121.7, 115.6, 112.0, 50.0, 34.1, 32.3, 23.8, -1.6;

IR (neat)  $\text{cm}^{-1}$  2952, 1756, 1595, 1503, 1493, 1365, 1308, 1250, 1192, 1162, 1125, 837;

HRMS (ESI-TOF,  $m/z$ ) calcd for  $\text{C}_{20}\text{H}_{28}\text{NO}_2\text{Si}$  ( $\text{M}+\text{H}$ ) $^+$ : 342.1884, found 342.1882.

### ***Preparation of 6e***

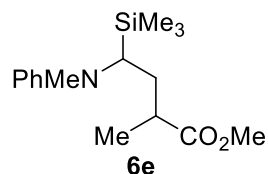

According to the General Procedure D, **1a** (27 mg, 0.1 mmol) and methyl methacrylate (13  $\mu\text{L}$ , 0.12 mmol) were converted to corresponding product **6e** (16 mg, 54 % yield, dr = 1.1:1) as a colorless liquid.



### Spectral Data of 6e

$^1\text{H}$  NMR (400 MHz,  $\text{CDCl}_3$ )  $\delta$  7.18 (t,  $J = 8.4$  Hz, 2H), 6.70 (d,  $J = 8.4$  Hz, 2H), 6.61 (t,  $J = 7.2$  Hz, 1H), 3.50 (s, 3H), 3.44 (dd,  $J_1 = 12.4$  Hz,  $J_2 = 3.2$  Hz, 1H), 2.76 (s, 3H), 2.43-2.35 (m, 1H), 2.29-2.21 (m, 1H), 1.50-1.44 (m, 1H), 1.11 (d,  $J = 6.8$  Hz, 3H), 0.03 (s, 9H);

$^{13}\text{C}$  NMR (100 MHz,  $\text{CDCl}_3$ )  $\delta$  177.4, 150.9, 129.1, 115.4, 111.9, 51.5, 48.0, 37.5, 33.9, 32.9, 16.8, -1.6;

IR (neat)  $\text{cm}^{-1}$  2951, 2925, 2855, 1733, 1596, 1503, 1249, 1198, 1160, 857, 837;

HRMS (ESI-TOF,  $m/z$ ) calcd for  $\text{C}_{16}\text{H}_{27}\text{NNaO}_2\text{Si}$  ( $\text{M}+\text{Na}$ ) $^+$ : 316.1703, found 316.1709.

### *Preparation of 6f*

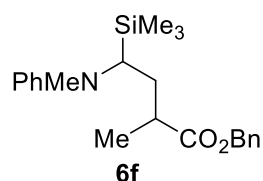

According to the General Procedure D, **1a** (27 mg, 0.1 mmol) and benzyl methacrylate (21  $\mu\text{L}$ , 0.12 mmol) were converted to corresponding products **6f** (30 mg, 78 % yield, dr = 1.5:1) as a colorless liquid.

### Spectral Data of 6f

$^1\text{H}$  NMR (400 MHz,  $\text{CDCl}_3$ )  $\delta$  7.32-7.29 (m, 3H), 7.20-7.16 (m, 4H), 6.71 (d,  $J = 8.4$  Hz, 2H), 6.62 (t,  $J = 7.2$  Hz, 1H), 5.02 (d,  $J = 12.4$  Hz, 1H), 4.82 (d,  $J = 12.4$  Hz, 1H), 3.45 (dd,  $J_1 = 12.4$  Hz,  $J_2 = 3.2$  Hz, 1H), 2.75 (s, 3H), 2.50-2.41 (m, 1H), 2.33-2.25 (m, 1H), 1.52-1.46 (m, 1H), 1.14 (d,  $J = 6.8$  Hz, 3H), 0.03 (s, 9H);

$^{13}\text{C}$  NMR (100 MHz,  $\text{CDCl}_3$ )  $\delta$  176.8, 150.9, 136.2, 129.2, 128.5, 128.2, 128.1, 115.5, 112.0, 66.2, 48.3, 37.8, 34.0, 32.9, 17.0, -1.6;

IR (neat)  $\text{cm}^{-1}$  2927, 1725, 1595, 1502, 1455, 1249, 1152, 835, 857;

HRMS (ESI-TOF,  $m/z$ ) calcd for  $\text{C}_{22}\text{H}_{32}\text{NO}_2\text{Si}$  ( $\text{M}+\text{H}$ ) $^+$ : 370.2197, found 370.2196.

### Preparation of 6g

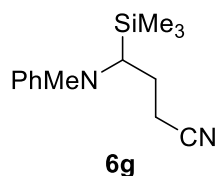

According to the General Procedure D, **1a** (27 mg, 0.1 mmol) and acrylonitrile (8  $\mu$ L, 0.12 mmol) were converted to corresponding products **6g** (12 mg, 47 % yield) as a faint yellow liquid.

### Spectral Data of 6g

$^1\text{H}$  NMR (400 MHz,  $\text{CDCl}_3$ )  $\delta$  7.22 (dd,  $J_1 = 8.8$  Hz,  $J_2 = 7.2$  Hz, 2H), 6.76 (d,  $J = 8.8$  Hz, 2H), 6.67 (t,  $J = 7.2$  Hz, 1H), 3.43 (dd,  $J_1 = 12.4$  Hz,  $J_2 = 3.2$  Hz, 1H), 2.81 (s, 3H), 2.41-2.24 (m, 2H), 2.15-2.05 (m, 1H), 1.95-1.87 (m, 1H), 0.07 (s, 9H);

$^{13}\text{C}$  NMR (100 MHz,  $\text{CDCl}_3$ )  $\delta$  150.9, 129.4, 120.0, 116.3, 112.3, 50.1, 34.1, 25.4, 15.6, -1.6;

IR (neat)  $\text{cm}^{-1}$  2953, 1596, 1502, 1250, 837, 747, 691;

HRMS (ESI-TOF,  $m/z$ ) calcd for  $\text{C}_{14}\text{H}_{23}\text{N}_2\text{Si}$  ( $\text{M}+\text{H}$ ) $^+$ : 247.1625, found 247.1622.

### Preparation of 6h

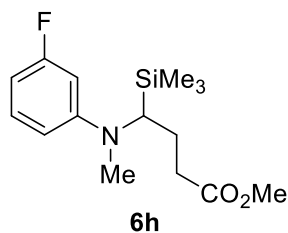

According to the General Procedure E, **11** (29 mg, 0.1 mmol) and methyl acrylate (46  $\mu$ L, 0.5 mmol) were converted to corresponding product **6h** (14 mg, 46 % yield) as a colorless liquid and homo-diaddition by-product (8 mg, 25 % yield).

### Spectral Dates of 6h

$^1\text{H}$  NMR (400 MHz,  $\text{CDCl}_3$ )  $\delta$  7.09 (q,  $J = 8.4$  Hz, 1H), 6.43 (dd,  $J_1 = 8.4$  Hz,  $J_2 = 2.8$

Hz, 1H), 6.35 (dt,  $J_1 = 13.6$  Hz,  $J_2 = 2.8$  Hz, 1H), 6.29 (tdd,  $J_1 = 8.4$  Hz,  $J_2 = 2.8$  Hz,  $J_3 = 0.8$  Hz, 1H), 3.59 (s, 3H), 3.33 (dd,  $J_1 = 12.4$  Hz,  $J_2 = 3.6$  Hz, 1H), 2.77 (s, 3H), 2.36-2.19 (m, 2H), 2.07-1.97 (m, 1H), 1.92-1.84 (m, 1H), 0.06 (s, 9H);

$^{13}\text{C}$  NMR (100 MHz,  $\text{CDCl}_3$ )  $\delta$  174.1, 164.4 (d,  $J = 239.7$  Hz), 152.8 (d,  $J = 10.6$  Hz), 130.3 (d,  $J = 10.5$  Hz), 107.3 (d,  $J = 2.1$  Hz), 101.8 (d,  $J = 21.6$  Hz), 98.6 (d,  $J = 25.9$  Hz), 51.6, 50.2, 34.2, 32.1, 23.9, -1.8;

IR (neat)  $\text{cm}^{-1}$  2952, 1734, 1615, 1577, 1497, 1250, 1159, 836, 750;

HRMS (ESI-TOF,  $m/z$ ) calcd for  $\text{C}_{15}\text{H}_{24}\text{FNNaO}_2\text{Si}$  ( $\text{M}+\text{Na}$ ) $^+$ : 320.1453, found 320.1449.

### ***Preparation of 6i***

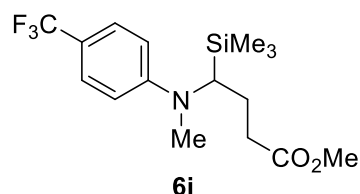

According to the General Procedure E, **1m** (34 mg, 0.1 mmol) and methyl acrylate (46  $\mu\text{L}$ , 0.5 mmol) were converted to corresponding product **6i** (21 mg, 59 % yield, mp: 49.5-52.5  $^\circ\text{C}$ ) as a white solid.

### **Spectral Dates of 6i**

$^1\text{H}$  NMR (400 MHz,  $\text{CDCl}_3$ )  $\delta$  7.39 (d,  $J = 8.8$  Hz, 2H), 6.68 (d,  $J = 8.8$  Hz, 2H), 3.58 (s, 3H), 3.46 (dd,  $J_1 = 12.0$  Hz,  $J_2 = 3.6$  Hz, 1H), 2.82 (s, 3H), 2.34-2.18 (m, 2H), 2.09-1.99 (m, 1H), 1.95-1.87 (m, 1H), 0.07 (s, 9H);

$^{13}\text{C}$  NMR (100 MHz,  $\text{CDCl}_3$ )  $\delta$  173.9, 153.0, 126.5 (q,  $J = 3.8$  Hz), 125.3 (q,  $J = 268.3$  Hz), 116.7 (q,  $J = 32.5$  Hz), 110.7, 51.6, 49.9, 34.1, 32.0, 23.9, -1.8;

IR (neat)  $\text{cm}^{-1}$  2953, 1736, 1614, 1528, 1328, 1252, 1201, 1162, 1101, 1070, 839, 814;

HRMS (ESI-TOF,  $m/z$ ) calcd for  $\text{C}_{16}\text{H}_{25}\text{F}_3\text{NO}_2\text{Si}$  ( $\text{M}+\text{H}$ ) $^+$ : 348.1601, found 348.1610.

### ***Preparation of 6j***

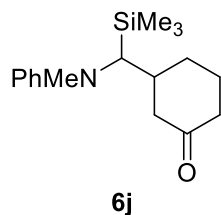

According to the General Procedure E, **1a** (27 mg, 0.1 mmol) and cyclohex-2-en-1-one (49  $\mu$ L, 0.5 mmol) were converted to corresponding products **6j** (9 mg, 31 % yield, dr = 1:1, mp: 81-84  $^{\circ}$ C) as a white solid.

### Spectral Data of 6j

$^1\text{H}$  NMR (400 MHz,  $\text{CDCl}_3$ )  $\delta$  7.18 (dd,  $J_1 = 8.0$  Hz,  $J_2 = 7.2$  Hz, 2H), 6.64 (d,  $J = 8.0$  Hz, 2H), 6.60 (t,  $J = 7.2$  Hz, 1H), 3.26 (d,  $J = 10.0$  Hz, 1H), 2.82 (s, 3H), 2.40-2.33 (m, 2H), 2.30-2.22 (m, 2H), 2.18-2.11 (m, 1H), 2.00-1.91 (m, 2H), 1.74-1.62 (m, 1H), 1.49-1.39 (m, 1H), 0.11 (s, 9H);

$^{13}\text{C}$  NMR (100 MHz,  $\text{CDCl}_3$ )  $\delta$  211.4, 150.7, 129.2, 115.2, 111.3, 56.0, 47.4, 41.6, 40.9, 35.2, 30.5, 25.9, -0.2;

IR (neat)  $\text{cm}^{-1}$  2947, 1710, 1596, 1508, 1251, 857, 836;

HRMS (ESI-TOF,  $m/z$ ) calcd for  $\text{C}_{17}\text{H}_{27}\text{NNaO}_4\text{Si}$  ( $\text{M}+\text{Na}$ ) $^+$ : 312.1754, found 312.1742.

### *Preparation of 6k*

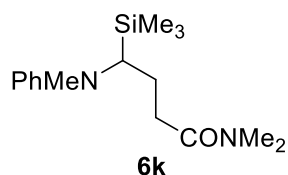

According to the General Procedure E, **1a** (27 mg, 0.1 mmol) and *N,N*-dimethylacrylamide (52  $\mu$ L, 0.5 mmol) was converted to corresponding product **6k** (18 mg, 60 % yield) as a colorless liquid after 24 h of stirring time.

### Spectral Data of 6k

$^1\text{H}$  NMR (400 MHz,  $\text{CDCl}_3$ )  $\delta$  7.17 (dd,  $J_1 = 8.8$  Hz,  $J_2 = 7.2$  Hz, 2H), 6.68 (d,  $J = 8.8$  Hz, 2H), 6.59 (t,  $J = 7.2$  Hz, 1H), 3.44 (q,  $J = 5.2$  Hz), 2.87 (s, 3H), 2.79 (s, 3H), 2.71

(s, 3H), 2.30-2.18 (m, 2H), 2.05-1.93 (m, 2H), 0.06 (s, 9H);

$^{13}\text{C}$  NMR (100 MHz,  $\text{CDCl}_3$ )  $\delta$  172.9, 151.4, 129.1, 115.1, 111.7, 49.8, 37.1, 35.4, 34.0, 30.6, 23.9, -1.6.;

IR (neat)  $\text{cm}^{-1}$  2951, 1644, 1595, 1248, 835;

HRMS (ESI-TOF,  $m/z$ ) calcd for  $\text{C}_{26}\text{H}_{28}\text{N}_2\text{NaOSi}$  ( $\text{M}+\text{Na}$ ) $^+$ : 315.1863, found 315.1860.

### ***Preparation of 6l***

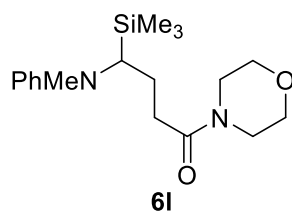

According to the General Procedure E, **1a** (27 mg, 0.1 mmol) and 1-morpholinoprop-2-en-1-one (64  $\mu\text{L}$ , 0.5 mmol) were converted to corresponding product **6l** (16 mg, 47 % yield, mp: 87.5-91  $^{\circ}\text{C}$ ) as a white solid.

### **Spectral Data of 6l**

$^1\text{H}$  NMR (400 MHz,  $\text{CDCl}_3$ )  $\delta$  7.17 (dd,  $J_1 = 8.0$  Hz,  $J_2 = 7.2$  Hz, 2H), 6.68 (d,  $J = 8.0$  Hz, 2H), 6.61 (t,  $J = 7.2$  Hz, 1H), 3.60-3.35 (m, 7H), 3.24-3.11 (m, 2H), 2.79 (s, 3H), 2.30-2.17 (m, 2H), 2.02-1.97 (m, 2H), 0.06 (s, 9H);

$^{13}\text{C}$  NMR (100 MHz,  $\text{CDCl}_3$ )  $\delta$  171.4, 151.4, 129.2, 115.3, 111.7, 66.9, 66.4, 49.8, 45.7, 41.9, 34.1, 30.1, 23.7, -1.7;

IR (neat)  $\text{cm}^{-1}$  2954, 2920, 2853, 1647, 1595, 1503, 1432, 1249, 1115, 837;

HRMS (ESI-TOF,  $m/z$ ) calcd for  $\text{C}_{18}\text{H}_{30}\text{N}_2\text{NaO}_2\text{Si}$  ( $\text{M}+\text{Na}$ ) $^+$ : 357.1969, found 357.1980.

### ***Preparation of 6m***

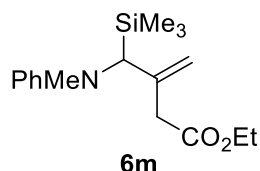

According to the General Procedure E, **1a** (27 mg, 0.1 mmol) and ethyl buta-2,3-dienoate (60  $\mu$ L, 0.5 mmol) was converted to corresponding product **6m** (17 mg, 54 % yield) as a colorless liquid.

### Spectral Data of 6m

$^1\text{H}$  NMR (400 MHz,  $\text{CDCl}_3$ )  $\delta$  7.20 (dd,  $J_1 = 8.8$  Hz,  $J_2 = 7.2$  Hz, 2H), 6.75 (d,  $J = 8.8$  Hz, 2H), 6.65 (t,  $J = 7.2$  Hz, 1H), 5.04 (s, 1H), 5.00 (s, 1H), 4.12 (s, 1H), 4.06-3.89 (m, 2H), 3.00 (d,  $J = 2.8$  Hz, 2H), 2.97 (s, 3H), 1.17 (t,  $J = 7.2$  Hz, 3H), 0.18 (s, 9H);

$^{13}\text{C}$  NMR (100 MHz,  $\text{CDCl}_3$ )  $\delta$  171.2, 150.5, 142.2, 129.0, 115.8, 114.1, 111.9, 60.6, 58.4, 40.6, 37.6, 14.2, -0.4;

IR (neat)  $\text{cm}^{-1}$  2955, 1733, 1597, 1502, 1252, 839;

HRMS (ESI-TOF,  $m/z$ ) calcd for  $\text{C}_{17}\text{H}_{27}\text{NNaO}_2\text{Si}$  ( $\text{M}+\text{Na}$ ) $^+$ : 328.1703, found 328.1700.

### 2.5. Synthesis of Hetero-Diaddition Products 3

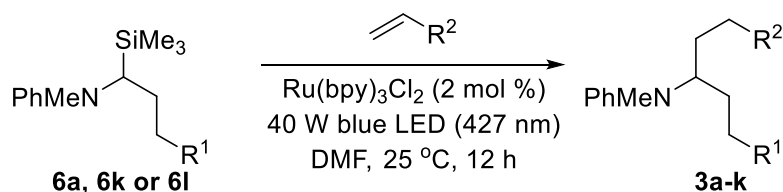

**General procedure F** (alkenes were added after deoxygenation of DMF). A dried 15 mL Schlenk seal tube was charged with  $\text{Ru(bpy)}_3\text{Cl}_2$  (1.3 mg, 0.002 mmol) and sealed with rubber plug in Standard Glovebox. **6a**, **6k** or **6l** (0.1 mmol) and DMF (2 mL) were added into the tube at 25  $^\circ\text{C}$  under positive argon pressure. The solution was allowed to purge with high purity argon gas using a 15 cm syringe needle for at least 10 mins at 25  $^\circ\text{C}$  and charged with alkene (0.5 mmol) using syringe under positive argon pressure. The rubber plug was changed to polytetrafluoroethylene seal plug under positive argon pressure. The solution was stirred for 12 h under irradiation with 427 nm blue LED.

The reaction was concentrated in vacuo and purified by silica gel chromatography (gradient eluent: petroleum ether/EtOAc = 50:1→10:1) to afford **3**.

**General procedure G (alkenes were added before deoxygenation of DMF)**. A dried 15 mL Schlenk seal tube was charged with Ru(bpy)<sub>3</sub>Cl<sub>2</sub> (1.3 mg, 0.002mmol) and sealed with rubber plug in Standard Glovebox. **6a**, **6k** or **6l** (0.1 mmol), alkenes (0.5 mmol) and DMF (2 mL) were added into the tube at 25 °C under positive argon pressure. The solution was allowed to purge with high purity argon gas using a 15 cm syringe needle for at least 10 mins at 25 °C. The rubber plug was changed to polytetrafluoroethylene seal plug under positive argon pressure. The solution was stirred for 12 h under irradiation with 427 nm blue LED. The reaction was concentrated in vacuo and purified by silica gel chromatography (gradient eluent: petroleum ether/EtOAc = 50:1→10:1) to afford the desired products **3**.

#### **Preparation of 3a**

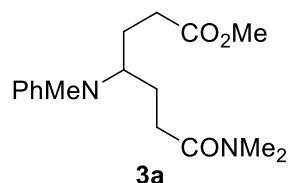

According to the General Procedure F, **6k** (30 mg, 0.1 mmol) and methyl acrylate (46  $\mu$ L, 0.5 mmol) were converted to corresponding product **3a** (24 mg, 79 % yield) as a colorless liquid.

#### **Spectral Data of 3a**

<sup>1</sup>H NMR (400 MHz, CDCl<sub>3</sub>)  $\delta$  7.18 (dd,  $J_1 = 8.8$  Hz,  $J_2 = 7.2$  Hz, 2H), 6.73 (d,  $J = 8.8$  Hz, 2H), 6.65 (t,  $J = 7.2$  Hz, 1H), 4.03-3.96 (m, 1H), 3.58 (s, 3H), 2.86 (s, 3H), 2.70 (s, 3H), 2.67 (s, 3H), 2.28-2.16 (m, 4H), 1.97-1.80 (m, 4H);

<sup>13</sup>C NMR (100 MHz, CDCl<sub>3</sub>)  $\delta$  174.0, 172.4, 151.1, 129.2, 116.4, 112.6, 56.5, 51.6, 37.0, 35.4, 31.2, 29.5, 29.5, 28.3, 28.1;

IR (neat) cm<sup>-1</sup> 2926, 1733, 1640, 1596, 1503, 1396, 1262, 1163, 1101;

HRMS (ESI-TOF, m/z) calcd for C<sub>17</sub>H<sub>26</sub>N<sub>2</sub>NaO<sub>3</sub> (M+Na)<sup>+</sup>: 329.1836 , found 329.1847.

### ***Preparation of 3b***

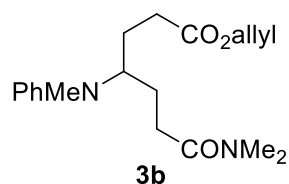

According to the General Procedure F, **6k** (30 mg, 0.1 mmol) and allyl acrylate (62  $\mu$ L, 0.5 mmol) were converted to corresponding product **3b** (21 mg, 62 % yield) as a colorless liquid.

### **Spectral Data of 3b**

<sup>1</sup>H NMR (400 MHz, CDCl<sub>3</sub>)  $\delta$  7.17 (dd,  $J_1 = 8.8$  Hz,  $J_2 = 6.8$  Hz, 2H), 6.73 (d,  $J = 8.8$  Hz, 2H), 6.65 (t,  $J = 6.8$  Hz, 1H), 5.87-5.77 (m, 1H), 5.24 (dq,  $J_1 = 17.2$  Hz,  $J_2 = 1.6$  Hz, 1H), 5.18 (dq,  $J_1 = 10.4$  Hz,  $J_2 = 1.6$  Hz, 1H), 4.48 (d,  $J = 5.6$  Hz, 2H), 4.04-3.97 (m, 1H), 2.86 (s, 3H), 2.70 (s, 3H), 2.68 (s, 3H), 2.30 (t,  $J = 7.6$  Hz, 2H), 2.23-2.14 (m, 2H), 1.97-1.80 (m, 4H);

<sup>13</sup>C NMR (100 MHz, CDCl<sub>3</sub>)  $\delta$  173.2, 172.4, 151.1, 132.2, 129.2, 118.3, 116.4, 112.6, 65.2, 56.5, 37.0, 35.4, 31.4, 29.5, 28.2, 28.1;

IR (neat) cm<sup>-1</sup> 2926, 1732, 1642, 1596, 1504, 1396, 1266, 1158, 1101, 988, 923;

HRMS (ESI-TOF, m/z) calcd for C<sub>19</sub>H<sub>28</sub>N<sub>2</sub>NaO<sub>3</sub> (M+Na)<sup>+</sup>: 355.1992 , found 355.1991.

### ***Preparation of 3c***

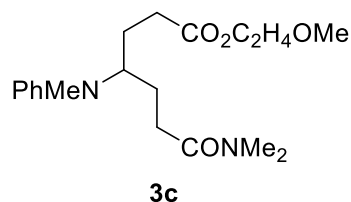

According to the General Procedure F, **6k** (30 mg, 0.1 mmol) and 2-methoxyethyl acrylate (66  $\mu$ L, 0.5 mmol) were converted to corresponding product **3c** (26 mg, 73 % yield) as a colorless liquid.



### **Spectral Data of 3c**

$^1\text{H}$  NMR (400 MHz,  $\text{CDCl}_3$ )  $\delta$  7.17 (dd,  $J_1 = 8.8$  Hz,  $J_2 = 7.2$  Hz, 2H), 6.73 (d,  $J = 8.8$  Hz, 2H), 6.45 (t,  $J = 7.2$  Hz, 1H), 4.13 (t,  $J = 4.8$  Hz, 2H), 4.04-3.96 (m, 1H), 3.48 (t,  $J = 4.8$  Hz, 2H), 3.33 (s, 3H), 2.86 (s, 3H), 2.70 (s, 3H), 2.67 (s, 3H), 2.31 (t,  $J = 7.6$  Hz, 2H), 2.23-2.14 (m, 2H), 1.97-1.80 (m, 4H);

$^{13}\text{C}$  NMR (100 MHz,  $\text{CDCl}_3$ )  $\delta$  173.6, 172.4, 151.1, 129.2, 116.4, 112.6, 70.4, 63.4, 59.0, 56.5, 37.0, 35.4, 31.4, 29.5, 29.5, 28.2, 28.1;

IR (neat)  $\text{cm}^{-1}$  2924, 1732, 1643, 1597, 1504, 1397, 1129, 1101, 1034;

HRMS (ESI-TOF,  $m/z$ ) calcd for  $\text{C}_{19}\text{H}_{30}\text{N}_2\text{NaO}_4$  ( $\text{M}+\text{Na}$ ) $^+$ : 373.2098, found 373.2096.

### ***Preparation of 3d***

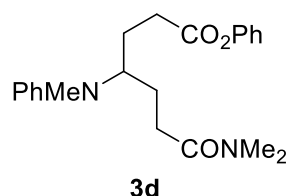

According to the General Procedure F, **6k** (30 mg, 0.1 mmol) and phenyl acrylate (71  $\mu\text{L}$ , 0.5 mmol) were converted to corresponding product **3d** (29 mg, 78 % yield) as a colorless liquid.

### **Spectral Data of 3d**

$^1\text{H}$  NMR (400 MHz,  $\text{CDCl}_3$ )  $\delta$  7.33 (t,  $J = 7.6$  Hz, 2H), 7.23-7.17 (m, 3H), 6.94 (d,  $J = 8.0$  Hz, 2H), 6.79 (d,  $J = 7.6$  Hz, 2H), 6.69 (t,  $J = 7.2$  Hz, 1H), 4.13-4.06 (m, 1H), 2.86 (s, 3H), 2.71 (s, 3H), 2.70 (s, 3H), 2.54 (t,  $J = 7.2$  Hz, 2H), 2.26-2.15 (m, 2H), 2.08-1.84 (m, 4H);

$^{13}\text{C}$  NMR (100 MHz,  $\text{CDCl}_3$ )  $\delta$  172.3, 172.1, 151.1, 150.7, 129.3, 129.3, 125.8, 121.6, 116.6, 112.7, 56.6, 37.0, 35.4, 31.5, 29.6, 29.5, 28.1, 28.1;

IR (neat)  $\text{cm}^{-1}$  2924, 1755, 1641, 1596, 1504, 1397, 1193, 1162, 1132, 1101;

HRMS (ESI-TOF,  $m/z$ ) calcd for  $\text{C}_{22}\text{H}_{28}\text{N}_2\text{NaO}_3$  ( $\text{M}+\text{Na}$ ) $^+$ : 391.1992, found 391.1996.

### Preparation of 3e

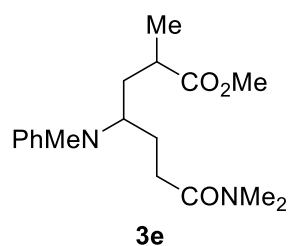

According to the General Procedure F, **6k** (30 mg, 0.1 mmol) and methyl methacrylate (55  $\mu$ L, 0.5 mmol) were converted to corresponding product **3e** (26 mg, 81 % yield, dr = 1.6:1) as a colorless liquid.

### Spectral Data of 3e

$^1\text{H}$  NMR (400 MHz,  $\text{CDCl}_3$ )  $\delta$  7.17 (dd,  $J_1 = 8.8$  Hz,  $J_2 = 7.2$  Hz, 2H), 6.75-6.69 (m, 2H), 6.64 (t,  $J = 7.2$  Hz, 1H), 4.08-3.99 (m, 1H), 3.52-3.49 (m, 3H), 2.86-2.85 (m, 3H), 2.73-2.64 (m, 6H), 2.47-2.37 (m, 1H), 2.22-2.04 (m, 3H), 1.95-1.78 (m, 2H), 1.66-1.48 (m, 1H), 1.16-1.11 (m, 3H);

$^{13}\text{C}$  NMR (100 MHz,  $\text{CDCl}_3$ )  $\delta$  177.0, 172.4, 172.3, 151.0, 150.9, 129.1, 116.4, 116.3, 112.6, 112.5, 55.3, 54.9, 51.6, 51.5, 37.2, 37.1, 37.1, 37.0, 36.9, 36.4, 35.4, 35.4, 29.8, 29.7, 29.6, 29.4, 28.1, 28.1, 18.2, 17.4;

IR (neat)  $\text{cm}^{-1}$  2927, 1731, 1643, 1597, 1504, 1396, 1196, 1165;

HRMS (ESI-TOF,  $m/z$ ) calcd for  $\text{C}_{18}\text{H}_{28}\text{N}_2\text{NaO}_3$  ( $\text{M}+\text{Na}$ ) $^+$ : 343.1992, found 343.1990.

### Preparation of 3f

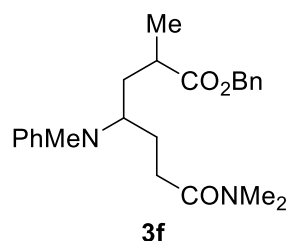

According to the General Procedure F, **6k** (30 mg, 0.1 mmol) and benzyl methacrylate (87  $\mu$ L, 0.5 mmol) were converted to corresponding product **3f** (37 mg, 93 % yield, dr = 1.5:1) as a colorless liquid.

### **Spectral Data of 3f**

$^1\text{H}$  NMR (400 MHz,  $\text{CDCl}_3$ )  $\delta$  7.34-7.27 (m, 3H), 7.23-7.11 (m, 4H), 6.75-6.62 (m, 3H), 5.06-4.83 (m, 2H), 4.08-4.01 (m, 1H), 2.86-2.84 (m, 3H), 2.72-2.63 (m, 6H), 2.53-2.43 (m, 1H), 2.20-1.76 (m, 5H), 1.68-1.50 (m, 1H), 1.18-1.14 (m, 3H);

$^{13}\text{C}$  NMR (100 MHz,  $\text{CDCl}_3$ )  $\delta$  176.4, 176.4, 172.4, 172.3, 150.9, 136.1, 136.1, 129.2, 129.2, 128.5, 128.5, 128.3, 128.2, 128.1, 128.1, 116.4, 116.4, 112.6, 112.6, 66.3, 66.2, 55.3, 55.2, 37.3, 37.2, 37.1, 37.0, 36.9, 36.5, 35.4, 35.4, 29.8, 29.7, 29.6, 29.3, 28.2, 28.1, 18.3, 17.6;

IR (neat)  $\text{cm}^{-1}$  2928, 1729, 1644, 1597, 1504, 1455, 1396, 1159;

HRMS (ESI-TOF,  $m/z$ ) calcd for  $\text{C}_{24}\text{H}_{32}\text{N}_2\text{NaO}_3$  ( $\text{M}+\text{Na}$ ) $^+$ : 419.2305, found 419.2305.

### ***Preparation of 3g***

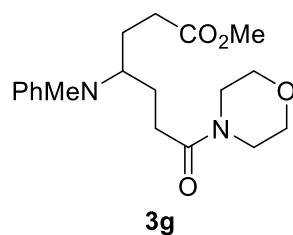

According to the General Procedure F, **6l** (34 mg, 0.1 mmol) and methyl acrylate (46  $\mu\text{L}$ , 0.5 mmol) were converted to corresponding product **3g** (28 mg, 80 % yield) as a colorless liquid.

### **Spectral Data of 3g**

$^1\text{H}$  NMR (400 MHz,  $\text{CDCl}_3$ )  $\delta$  7.18 (dd,  $J_1 = 8.8$  Hz,  $J_2 = 7.2$  Hz, 2H), 6.73 (d,  $J = 8.8$  Hz, 2H), 6.67 (t,  $J = 7.2$  Hz, 1H), 4.05-3.97 (m, 1H), 3.58-3.34 (m, 9H), 3.23-3.09 (m, 2H), 2.67 (s, 3H), 2.27 (t,  $J = 7.6$  Hz, 2H), 2.21-2.16 (m, 2H), 1.98-1.81 (m, 4H);

$^{13}\text{C}$  NMR (100 MHz,  $\text{CDCl}_3$ )  $\delta$  173.9, 171.0, 151.1, 129.3, 116.6, 112.6, 66.8, 66.4, 56.5, 51.6, 45.7, 42.0, 31.2, 29.5, 29.1, 28.3, 27.9;

IR (neat)  $\text{cm}^{-1}$  2922, 2854, 1733, 1641, 1596, 1504, 1434, 1228, 1114, 1032, 750;

HRMS (ESI-TOF,  $m/z$ ) calcd for  $\text{C}_{19}\text{H}_{28}\text{N}_2\text{NaO}_4$  ( $\text{M}+\text{Na}$ ) $^+$ : 371.1941, found 371.1938.

### ***Preparation of 3h***

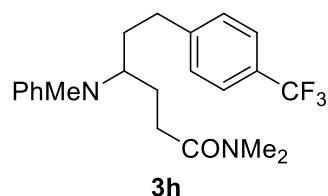

According to the General Procedure F, **6k** (30 mg, 0.1 mmol) and 4-(trifluoromethyl)styrene (76  $\mu$ L, 0.5 mmol) were converted to corresponding product **3h** (29 mg, 74 % yield) as a colorless liquid.

### **Spectral Dates of 3h**

$^1\text{H}$  NMR (400 MHz,  $\text{CDCl}_3$ )  $\delta$  7.48 (d,  $J = 8.0$  Hz, 2H), 7.20-7.16 (m, 4H), 6.70-6.65 (m, 3H), 4.00-3.92 (m, 1H), 2.87 (s, 3H), 2.73 (s, 3H), 2.71 (s, 3H), 2.63-2.59 (m, 2H), 2.24-2.19 (m, 2H), 2.03-1.79 (m, 4H);

$^{13}\text{C}$  NMR (100 MHz,  $\text{CDCl}_3$ )  $\delta$  172.5, 151.2, 146.3, 129.2, 128.8, 125.3 (q,  $J = 3.8$  Hz), 124.5 (q,  $J = 270.0$  Hz), 116.4, 112.7, 56.6, 37.0, 35.4, 35.0, 33.0, 29.6, 29.5, 28.1;

IR (neat)  $\text{cm}^{-1}$  2926, 1644, 1597, 1324, 1161, 1120, 1067;

HRMS (ESI-TOF,  $m/z$ ) calcd for  $\text{C}_{22}\text{H}_{27}\text{F}_3\text{N}_2\text{NaO}$  ( $\text{M}+\text{Na}$ ) $^+$ : 415.1968, found 415.1967.

### ***Preparation of 3i***

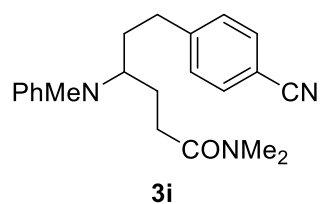

According to the General Procedure G, **6k** (30 mg, 0.1 mmol) and 4-vinylbenzonitrile (66 mg, 0.5 mmol) were converted to corresponding products **3i** (25 mg, 71 % yield) as a colorless liquid.

### **Spectral Data of 3i**

$^1\text{H}$  NMR (400 MHz,  $\text{CDCl}_3$ )  $\delta$  7.50 (d,  $J = 8.0$  Hz, 2H), 7.20-7.15 (m, 4 H), 6.69-6.65 (m, 3H), 3.99-3.91 (m, 1H), 2.87 (s, 3H), 2.71 (s, 3H), 2.70 (s, 3H), 2.64-2.57 (m, 2H),

2.25-2.16 (m, 2H), 2.02-1.79 (m, 4H);

$^{13}\text{C}$  NMR (100 MHz,  $\text{CDCl}_3$ )  $\delta$  172.4, 151.1, 147.8, 132.2, 129.3, 129.2, 119.2, 116.5, 112.6, 109.7, 56.5, 37.0, 35.4, 34.7, 33.3, 29.6, 29.3, 28.0;

IR (neat)  $\text{cm}^{-1}$  2924, 2855, 2226, 1638, 1596, 1503, 1395, 1095;

HRMS (ESI-TOF,  $m/z$ ) calcd for  $\text{C}_{22}\text{H}_{27}\text{N}_3\text{NaO}$  ( $\text{M}+\text{Na}$ ) $^+$ : 372.2046, found 372.2050.

### ***Preparation of 3j***

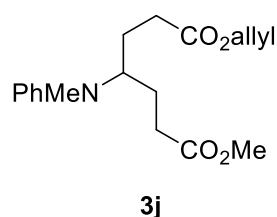

According to the General Procedure F, **6a** (28 mg, 0.1 mmol) and allyl acrylate (60  $\mu\text{L}$ , 0.5 mmol) were converted to corresponding product **3j** (28 mg, 89 % yield) as a colorless liquid.

### **Spectral Data of 3j**

$^1\text{H}$  NMR (400 MHz,  $\text{CDCl}_3$ )  $\delta$  7.19 (dd,  $J_1 = 8.8$  Hz,  $J_2 = 7.2$  Hz, 2H), 6.74 (d,  $J = 8.8$  Hz, 2H), 6.67 (t,  $J = 7.2$  Hz, 1H), 5.87-5.77 (m, 1H), 5.24 (dq,  $J_1 = 17.2$  Hz,  $J_2 = 1.6$  Hz, 1H), 5.19 (dq,  $J_1 = 10.4$  Hz,  $J_2 = 1.6$  Hz, 1H), 4.49 (dt,  $J_1 = 5.6$  Hz,  $J_2 = 1.6$  Hz, 2H), 4.02-3.94 (m, 1H), 3.58 (s, 3H), 2.68 (s, 3H), 2.31-2.24 (m, 4H), 1.96-1.79 (m, 4H);

$^{13}\text{C}$  NMR (100 MHz,  $\text{CDCl}_3$ )  $\delta$  173.8, 173.0, 150.9, 132.2, 129.2, 118.4, 116.7, 112.7, 65.2, 56.5, 51.6, 31.2, 31.1, 29.5, 28.1, 28.0;

IR (neat)  $\text{cm}^{-1}$  2926, 1730, 1597, 1504, 1248, 1194, 1169, 1103, 988, 922;

HRMS (ESI-TOF,  $m/z$ ) calcd for  $\text{C}_{18}\text{H}_{25}\text{NNaO}_4$  ( $\text{M}+\text{Na}$ ) $^+$ : 342.1676, found 342.1673.

### ***Preparation of 3k***

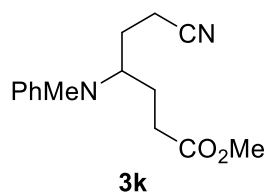

According to the General Procedure F, **6a** (28 mg, 0.1 mmol) and acrylonitrile (34  $\mu$ L, 0.5 mmol) were converted to corresponding product **3k** (15 mg, 56 % yield) as a colorless liquid.

### Spectral Data of 3k

$^1\text{H}$  NMR (400 MHz,  $\text{CDCl}_3$ )  $\delta$  7.23 (dd,  $J_1 = 8.8$  Hz,  $J_2 = 7.2$  Hz, 2H), 6.80 (d,  $J = 8.8$  Hz, 2H), 6.74 (t,  $J = 7.2$  Hz, 1H), 4.06-3.99 (m, 1H), 3.59 (s, 3H), 2.69 (s, 3H), 2.31-2.24 (m, 4H), 2.00-1.79 (m, 4H);

$^{13}\text{C}$  NMR (100 MHz,  $\text{CDCl}_3$ )  $\delta$  173.5, 150.5, 129.5, 119.6, 117.6, 113.2, 56.5, 51.7, 30.8, 29.6, 28.9, 27.7, 14.6;

IR (neat)  $\text{cm}^{-1}$  2951, 2246, 1731, 1596, 1504, 1436, 1319, 1196, 1159, 1105, 1032, 988, 916, 750;

HRMS (ESI-TOF,  $m/z$ ) calcd for  $\text{C}_{15}\text{H}_{20}\text{N}_2\text{NaO}_2$  ( $\text{M}+\text{Na}$ ) $^+$ : 283.1417, found 283.1416.

### 2.7. Cyclic Voltammetry Analysis

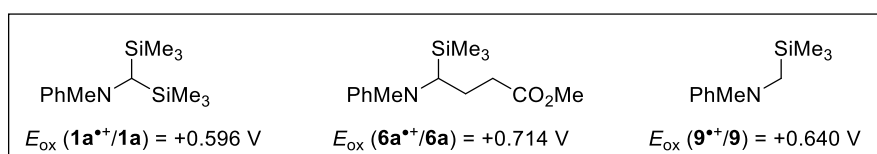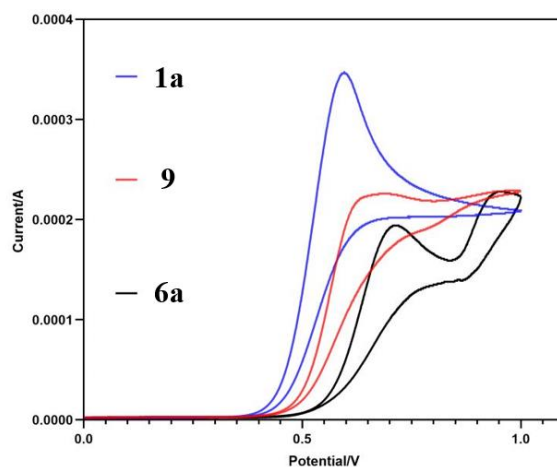

Cyclic Voltammetry experiments were conducted with a computer controlled CH Instruments Model 600E Series Electrochemical Analyzer/Workstation containing platinum wire working electrode, platinum wire counter electrode and saturated KCl silver-silver chloride electrode reference electrode.

Sample were prepared with 0.1 mmol of analyte (**1a**, **6a** and **9**) in 10 mL of 0.05 M *tetra-N*-butylammonium hexafluorophosphate in dry and degassed acetonitrile. Measurements employed a scan rate of 20 mV/s. **9** was prepared according to a published procedure described by Mariano and coworkers.<sup>4</sup>

4. X. M. Zhang and P. S. Mariano, *J. Org. Chem.*, 1991, **56**, 1655.

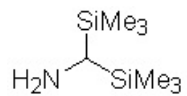

**4**

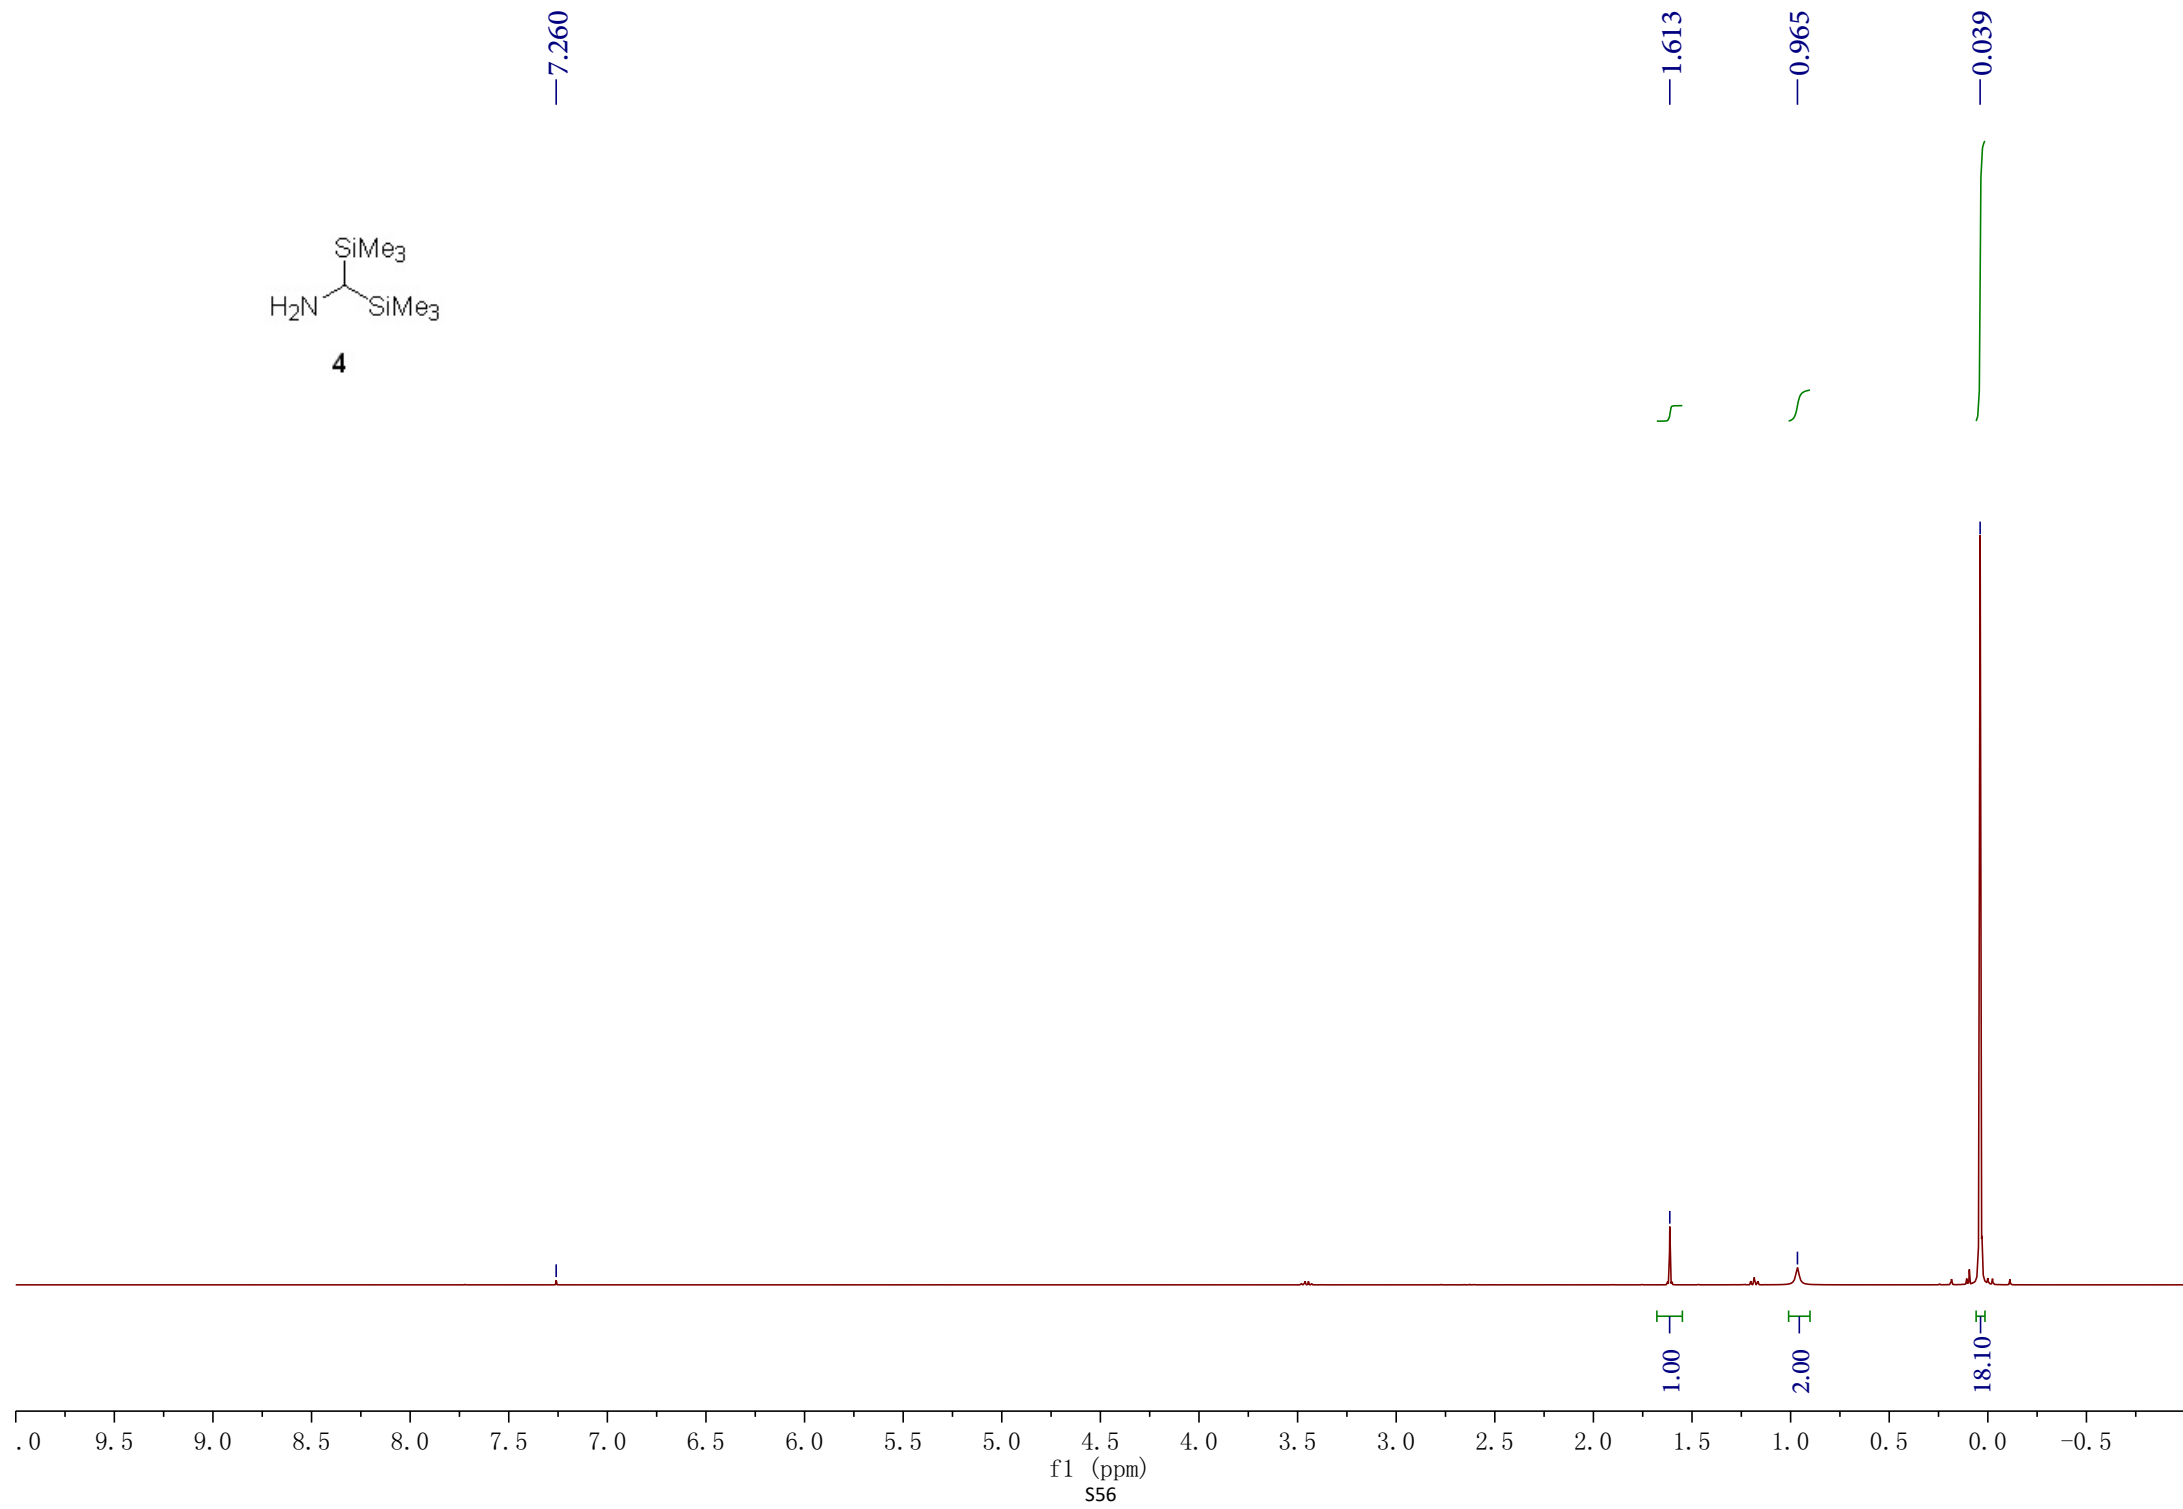



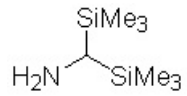

**4**

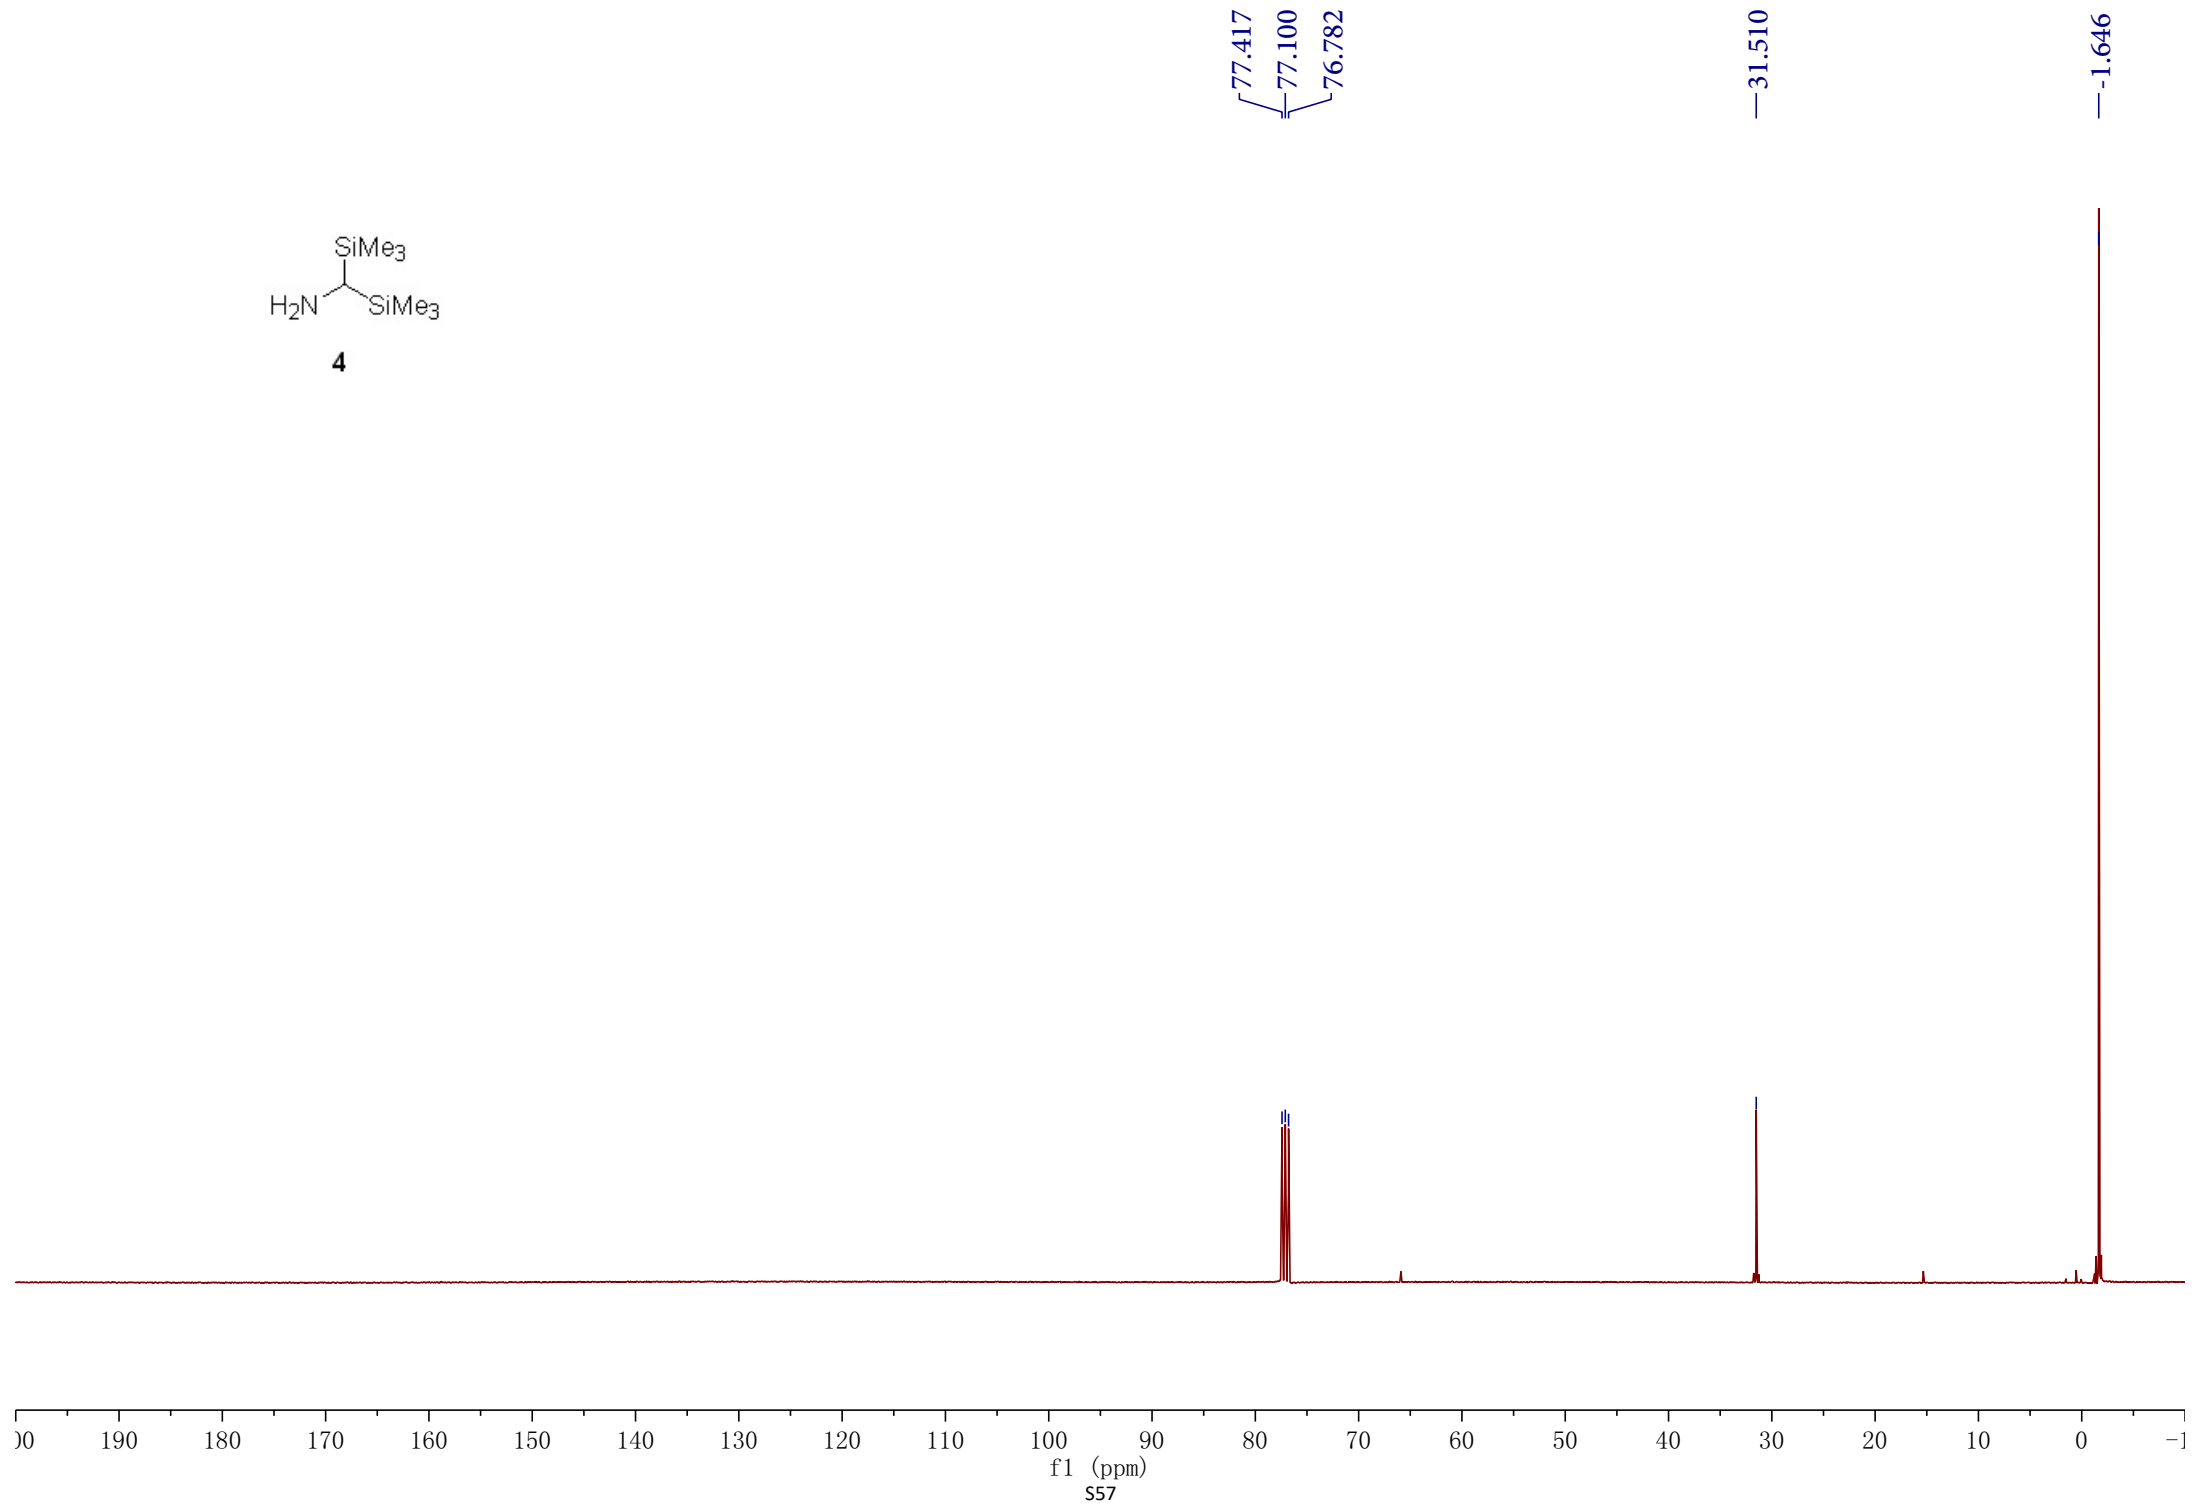

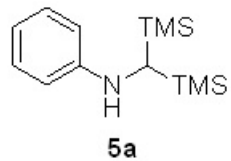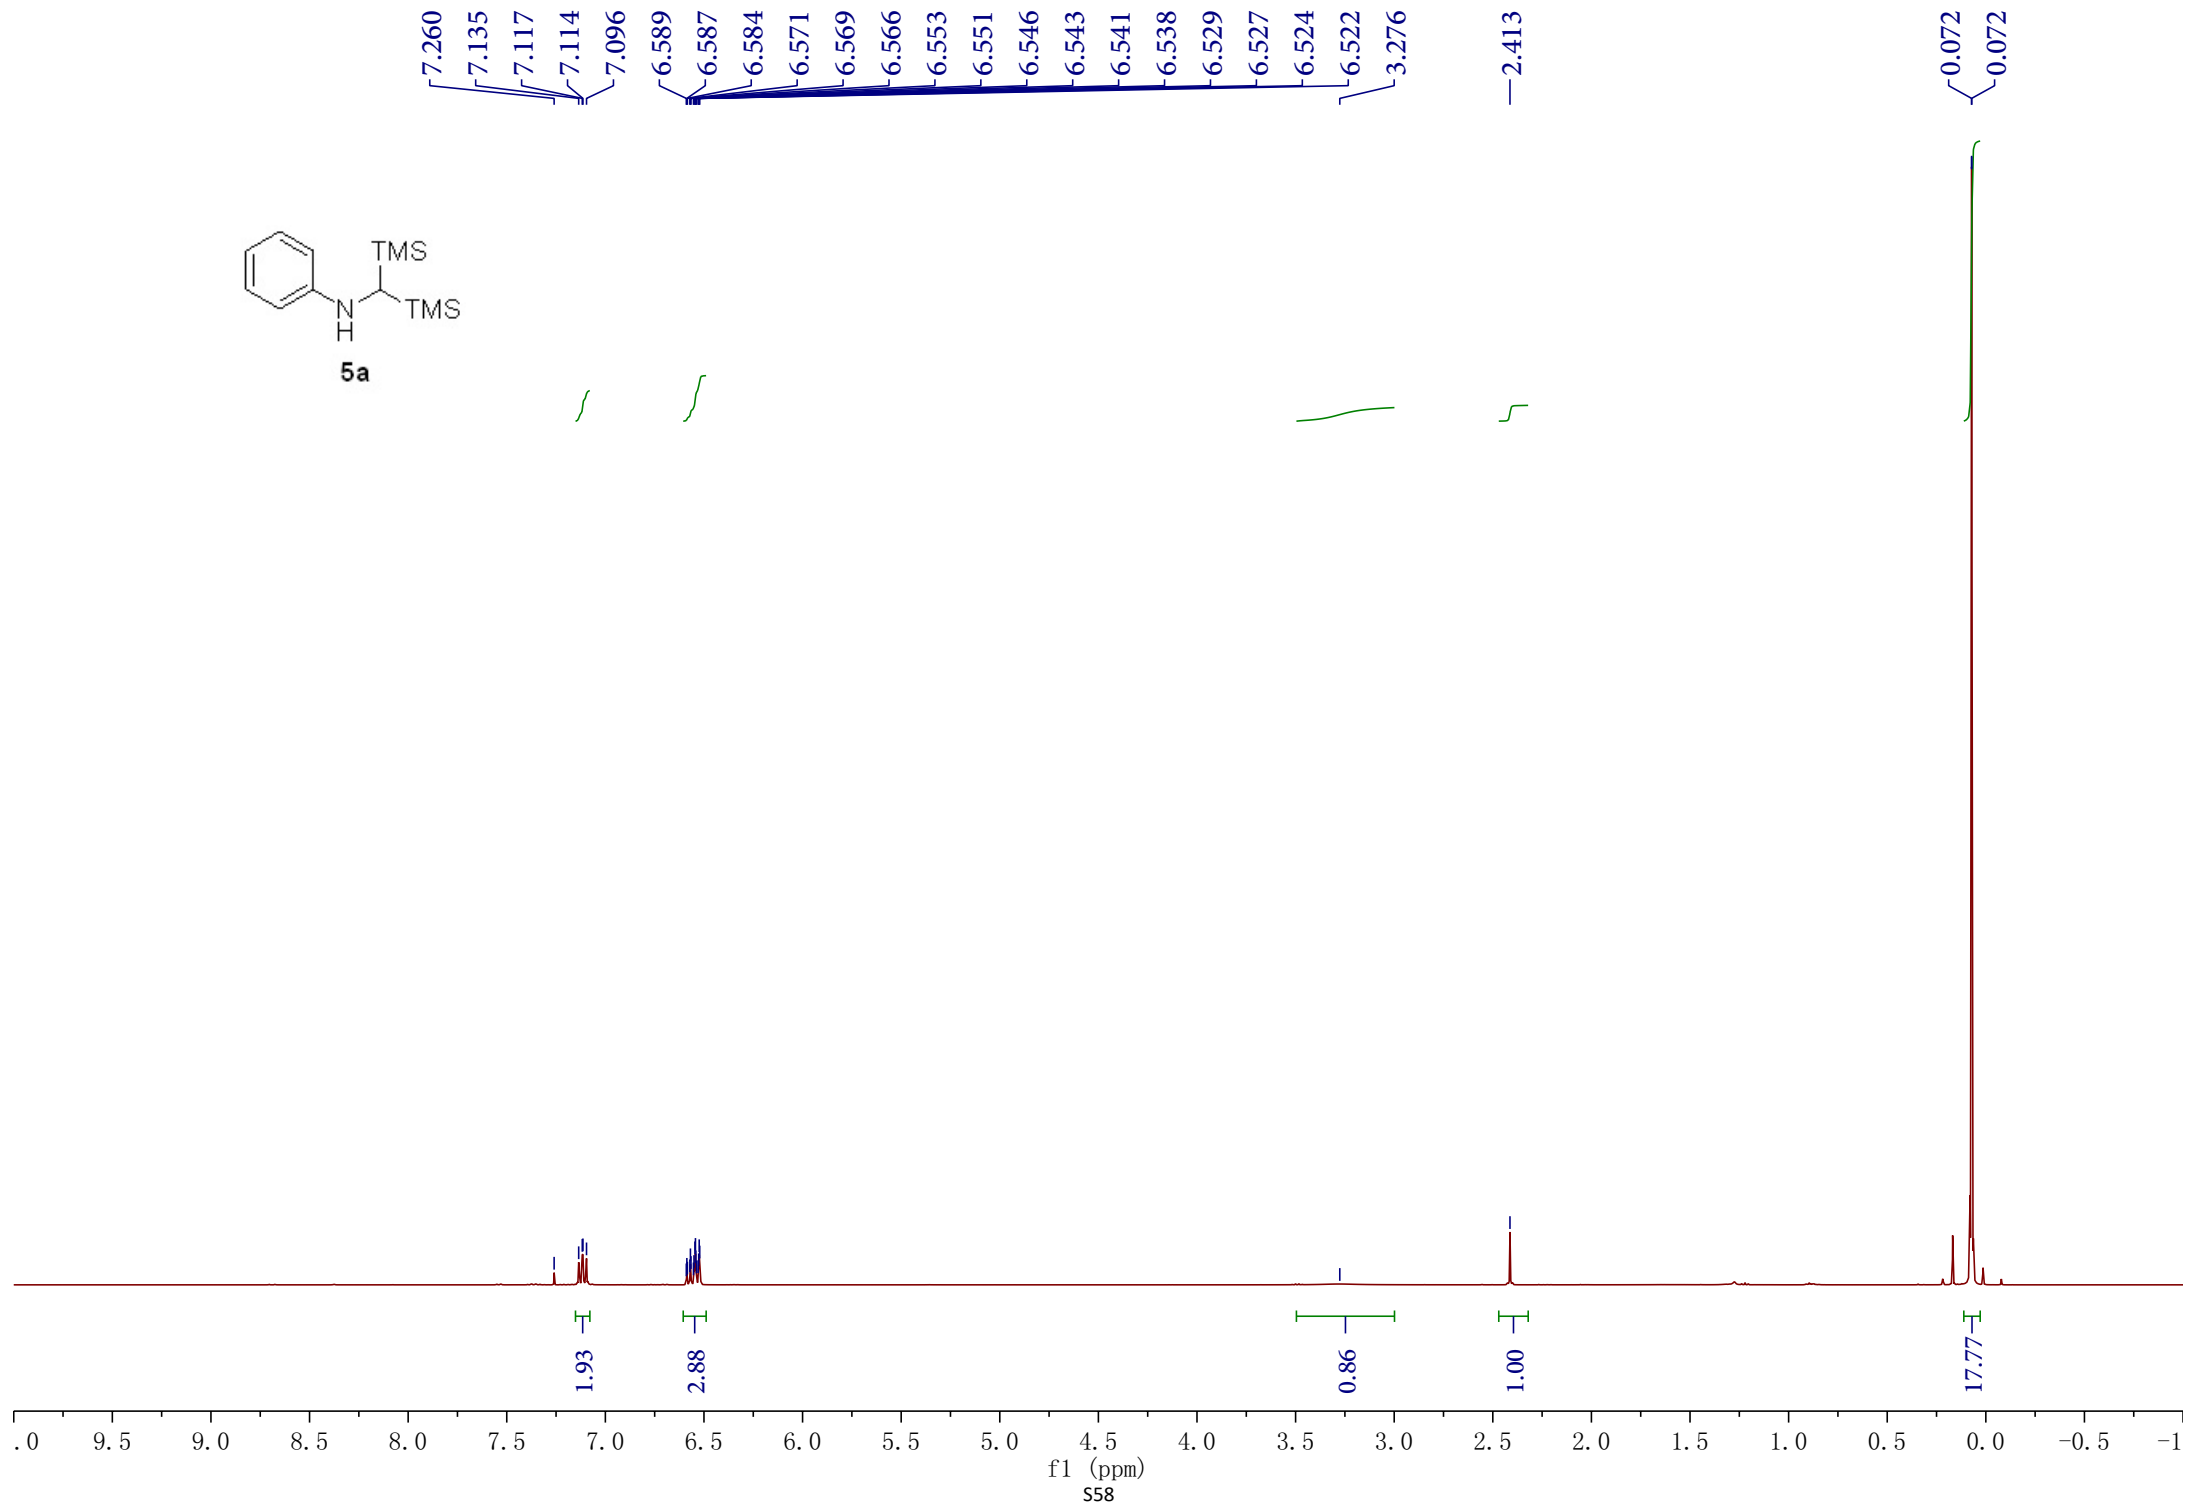

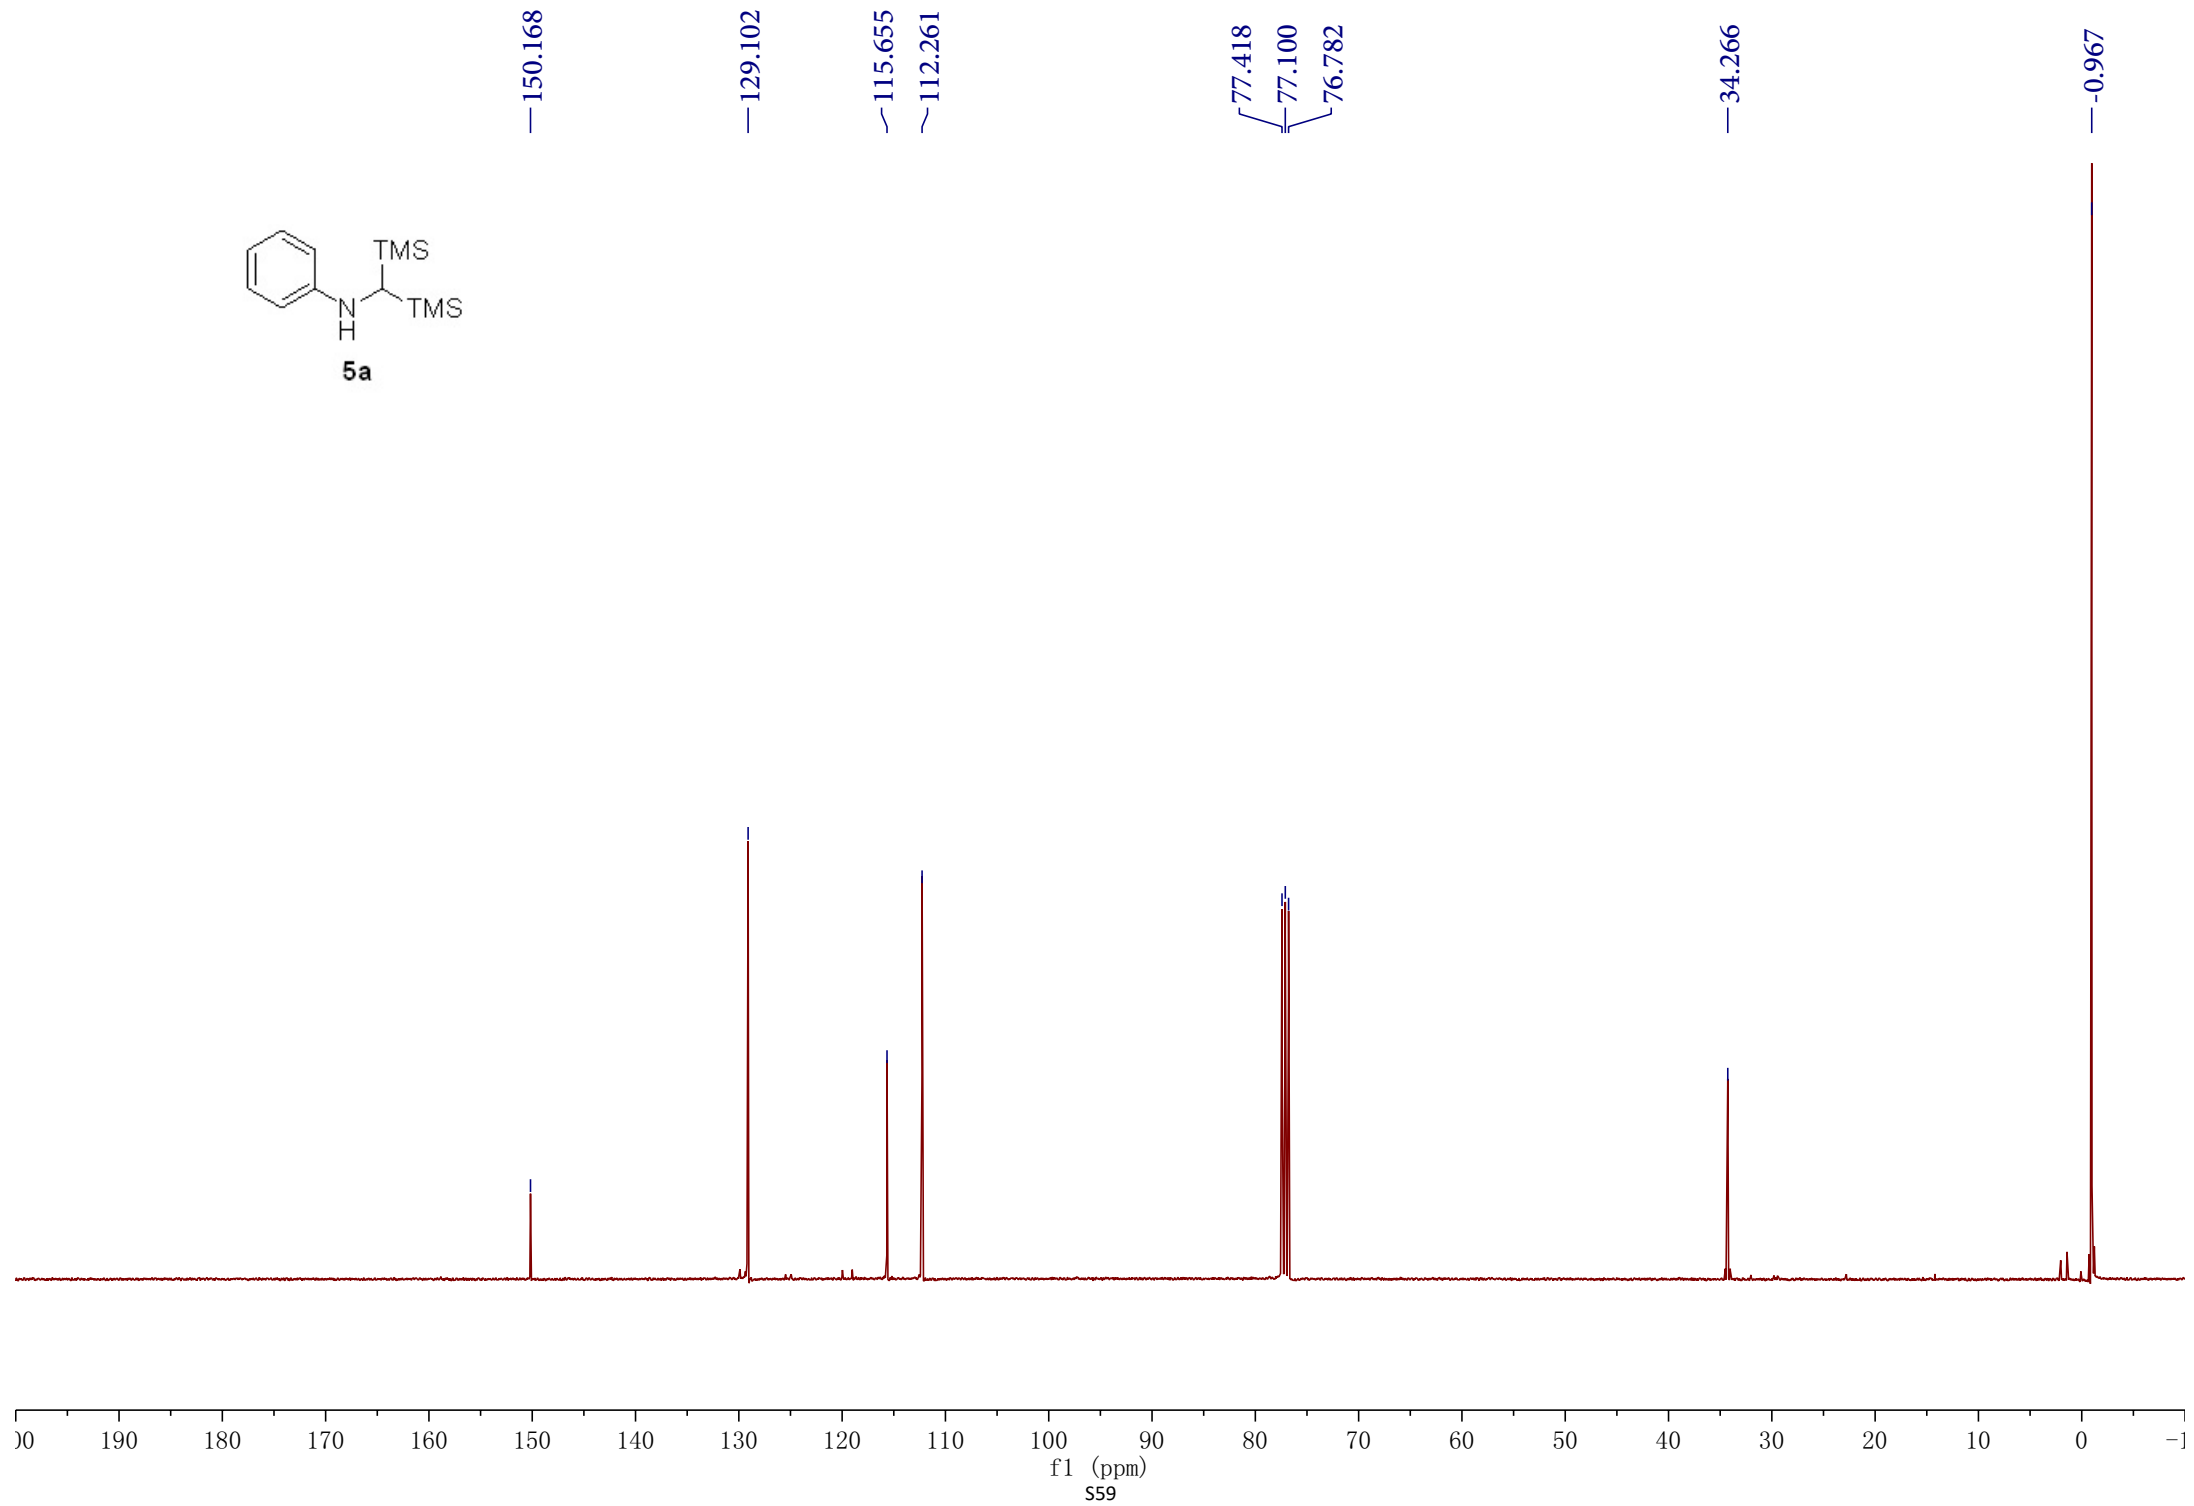

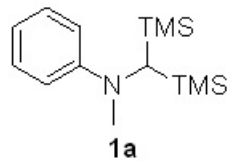

7.260  
7.206  
7.188  
7.183  
7.165  
6.632  
6.613  
6.578  
6.560  
6.542

2.954  
2.912

-0.107

/

/

/

17.79

1.92

1.97

0.97

2.92

1.00

17.79

9.5 9.0 8.5 8.0 7.5 7.0 6.5 6.0 5.5 5.0 4.5 4.0 3.5 3.0 2.5 2.0 1.5 1.0 0.5 0.0 -0.5 -1

f1 (ppm)  
S60

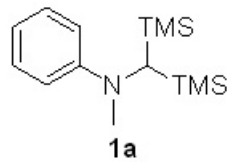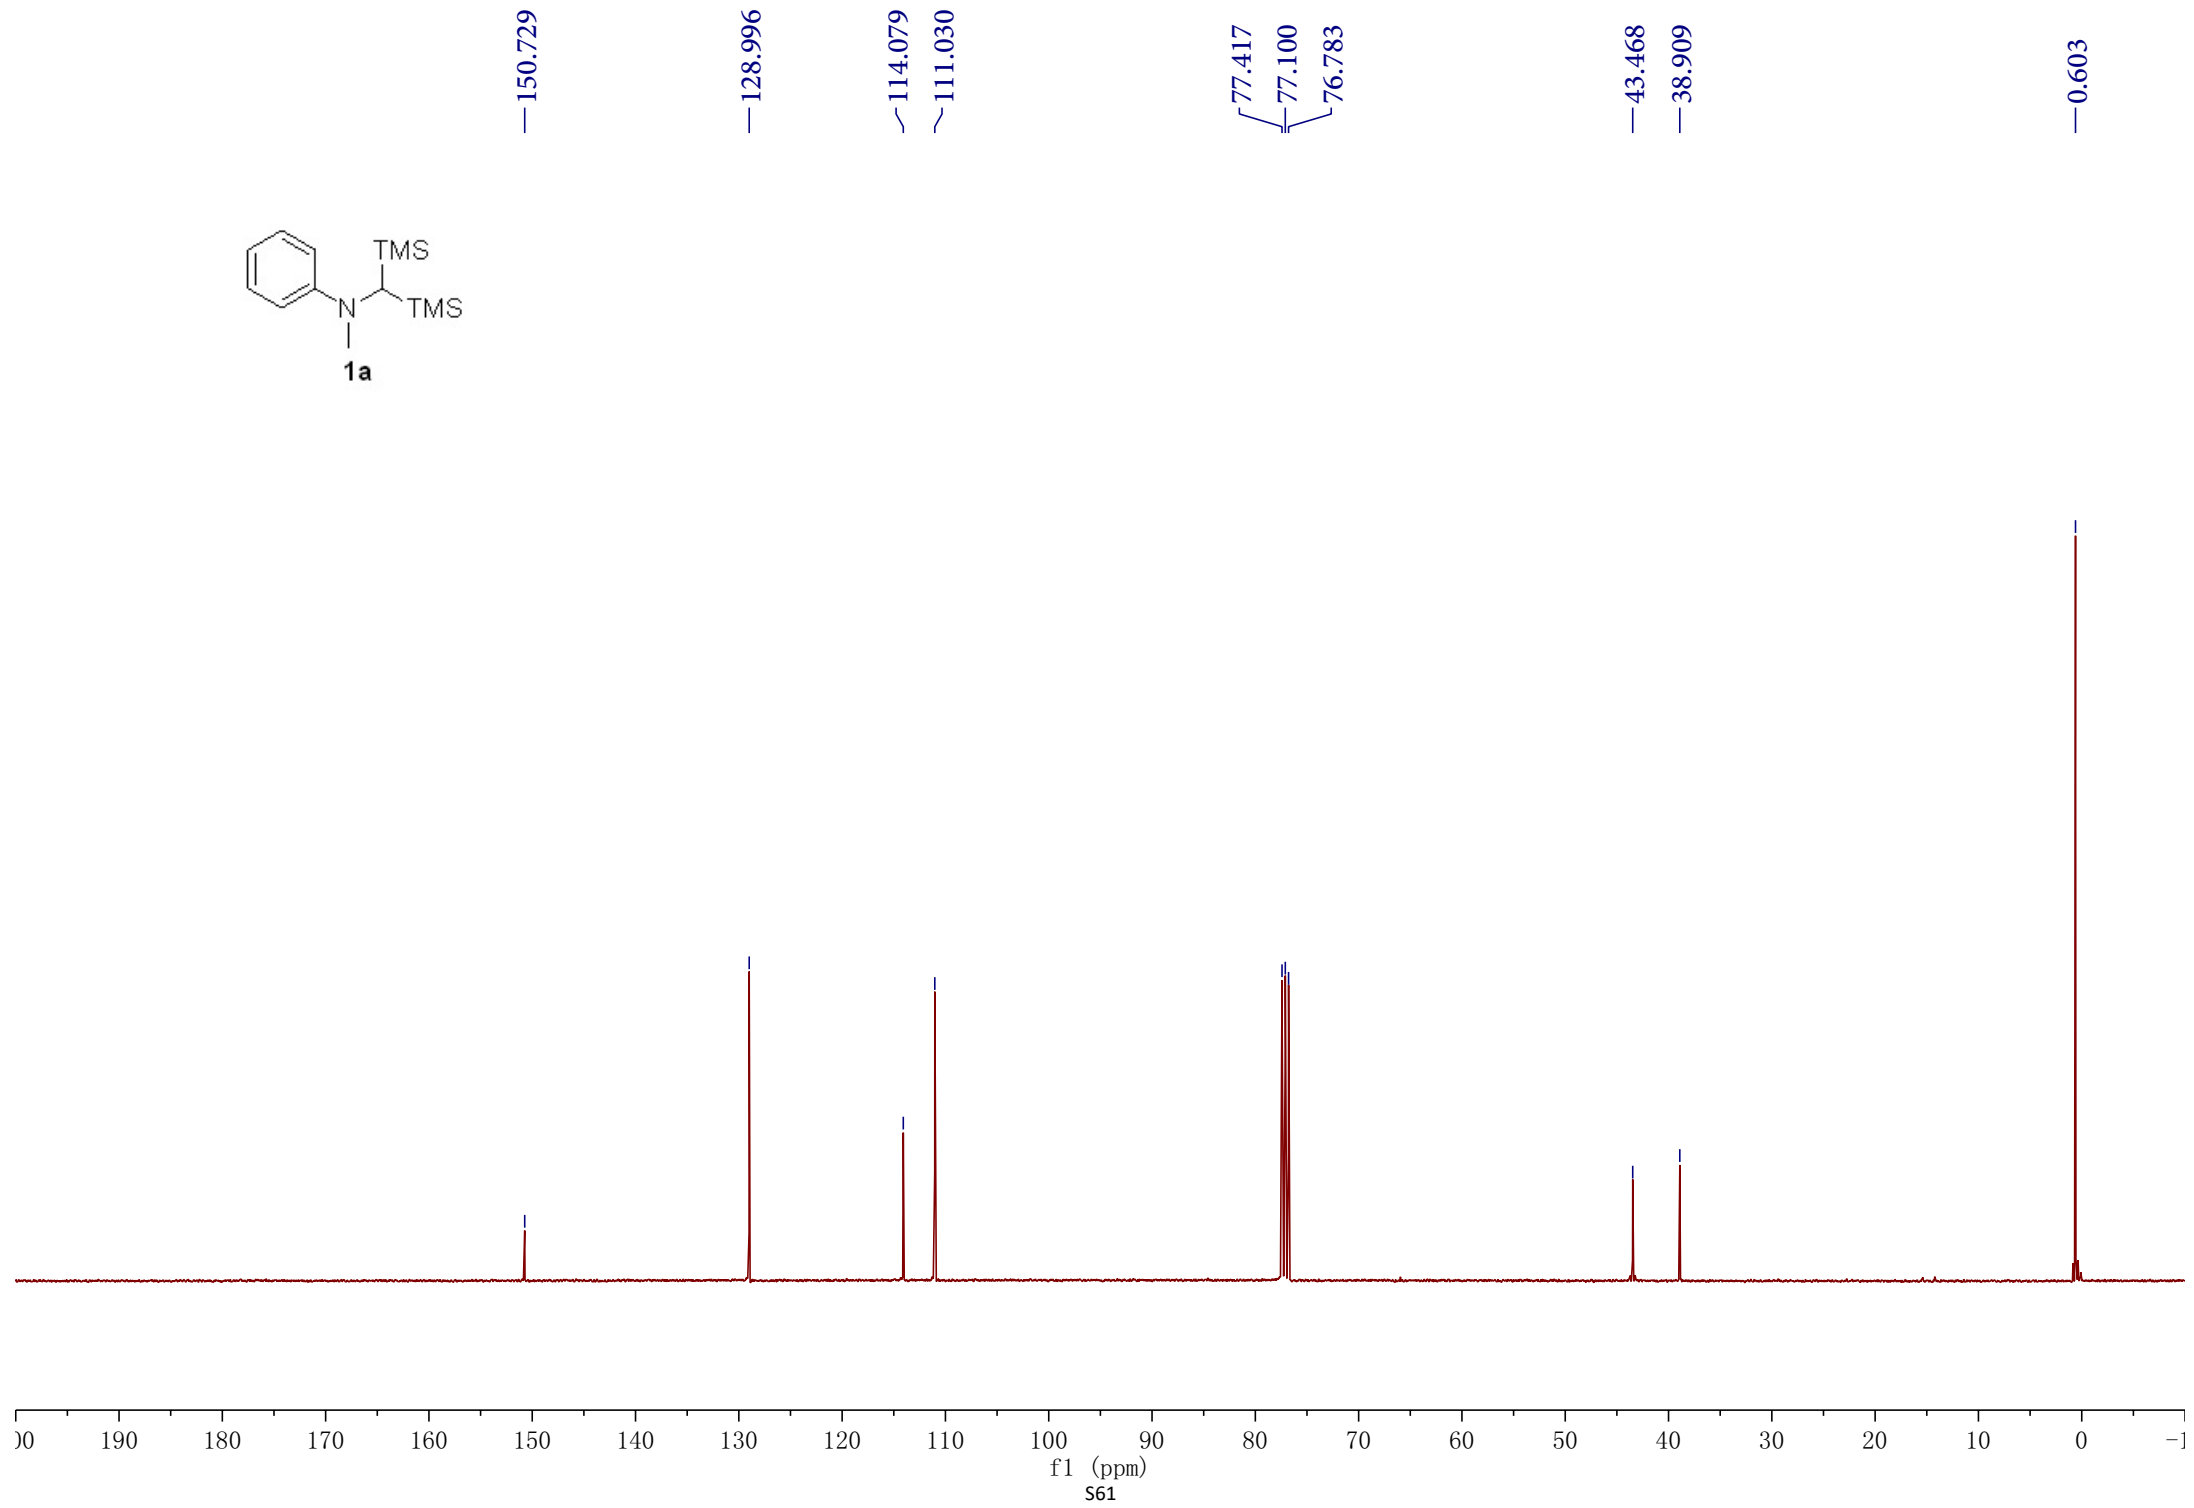

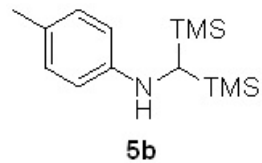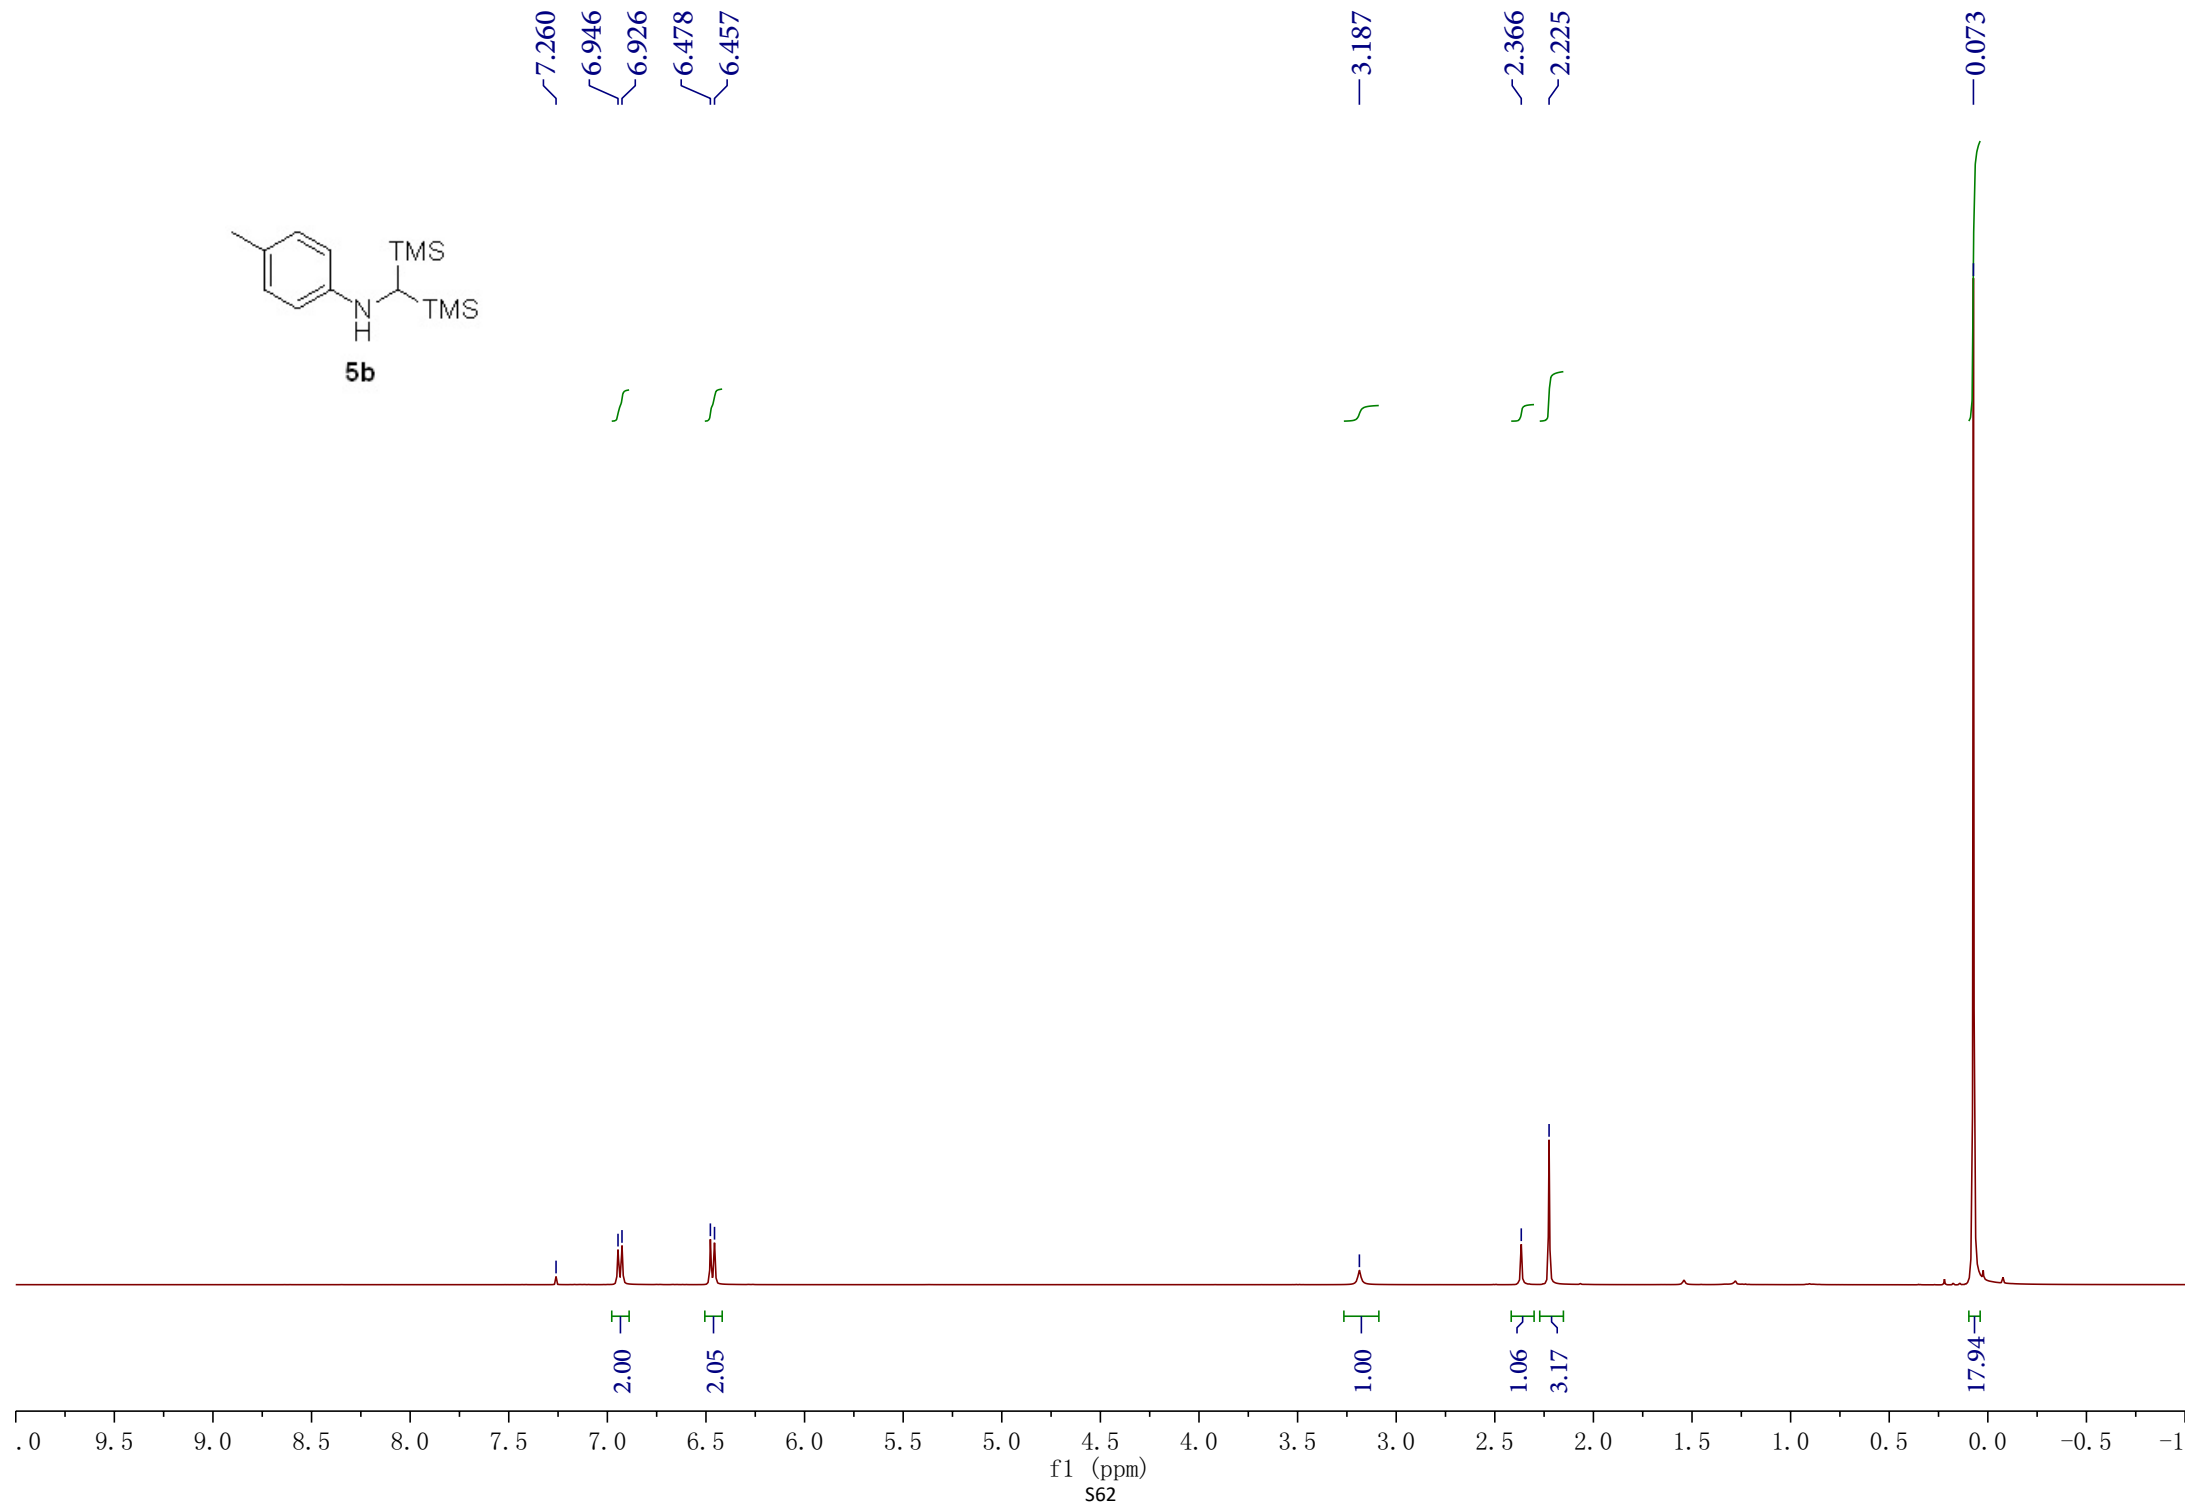

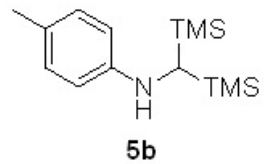

—148.061

—129.616

—124.667

—112.296

77.418

77.100

76.784

—34.474

—20.397

—0.943

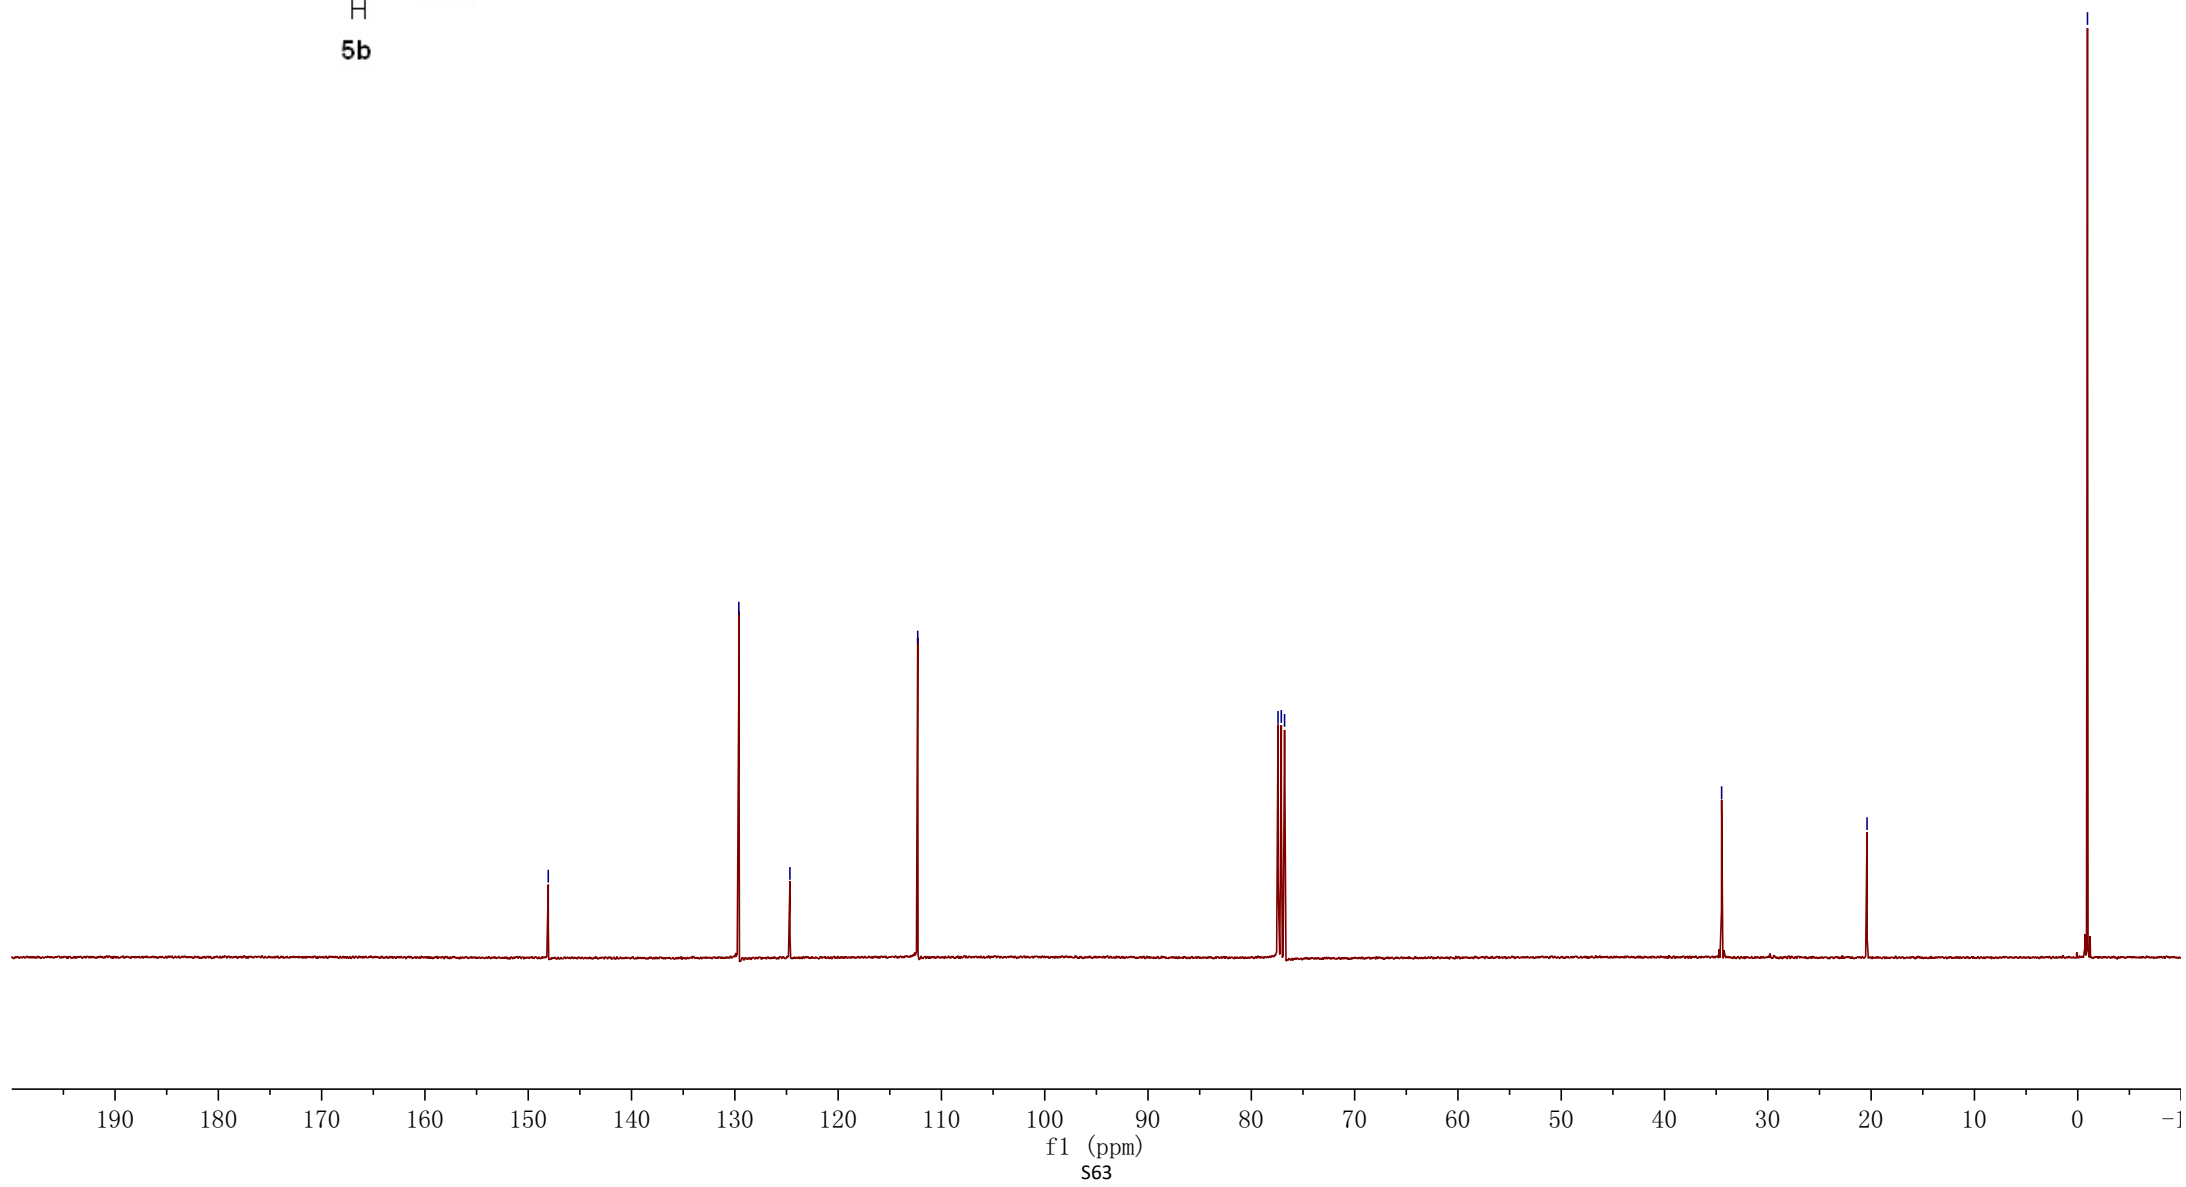

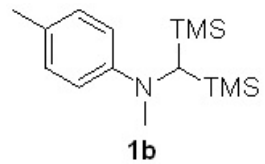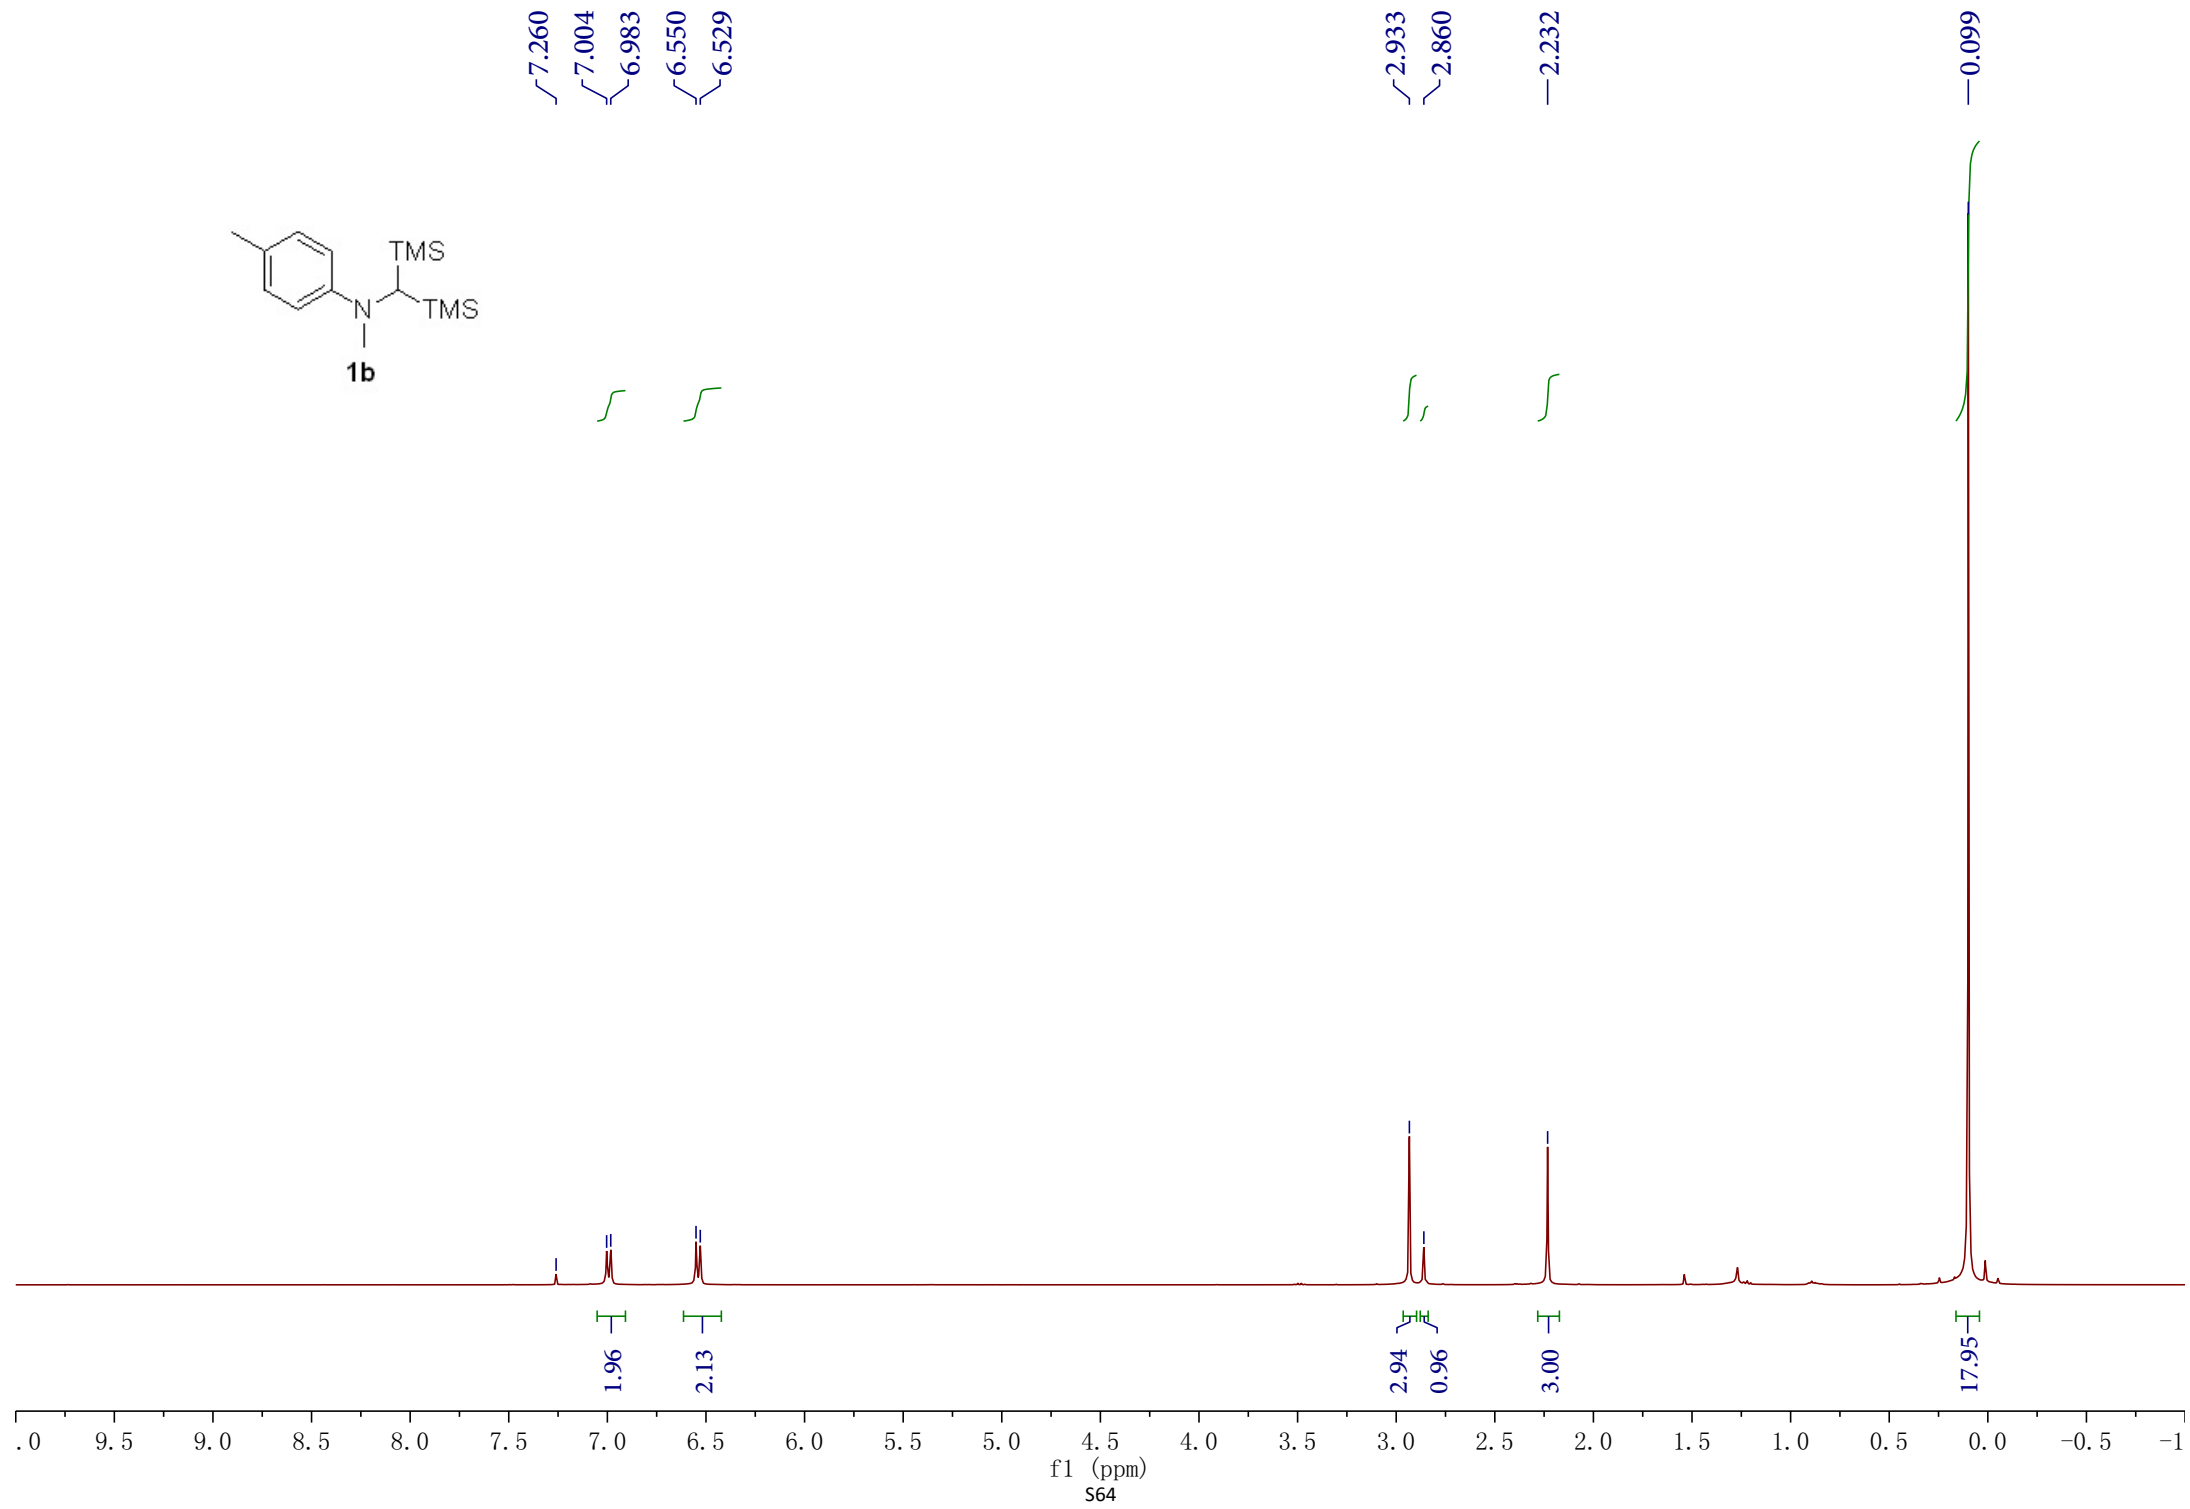



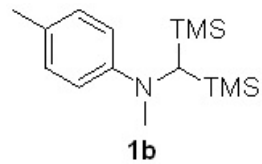

—148.842

—129.595

—122.984

—111.102

77.419

77.101

76.784

—43.737

—38.971

—20.210

—0.680

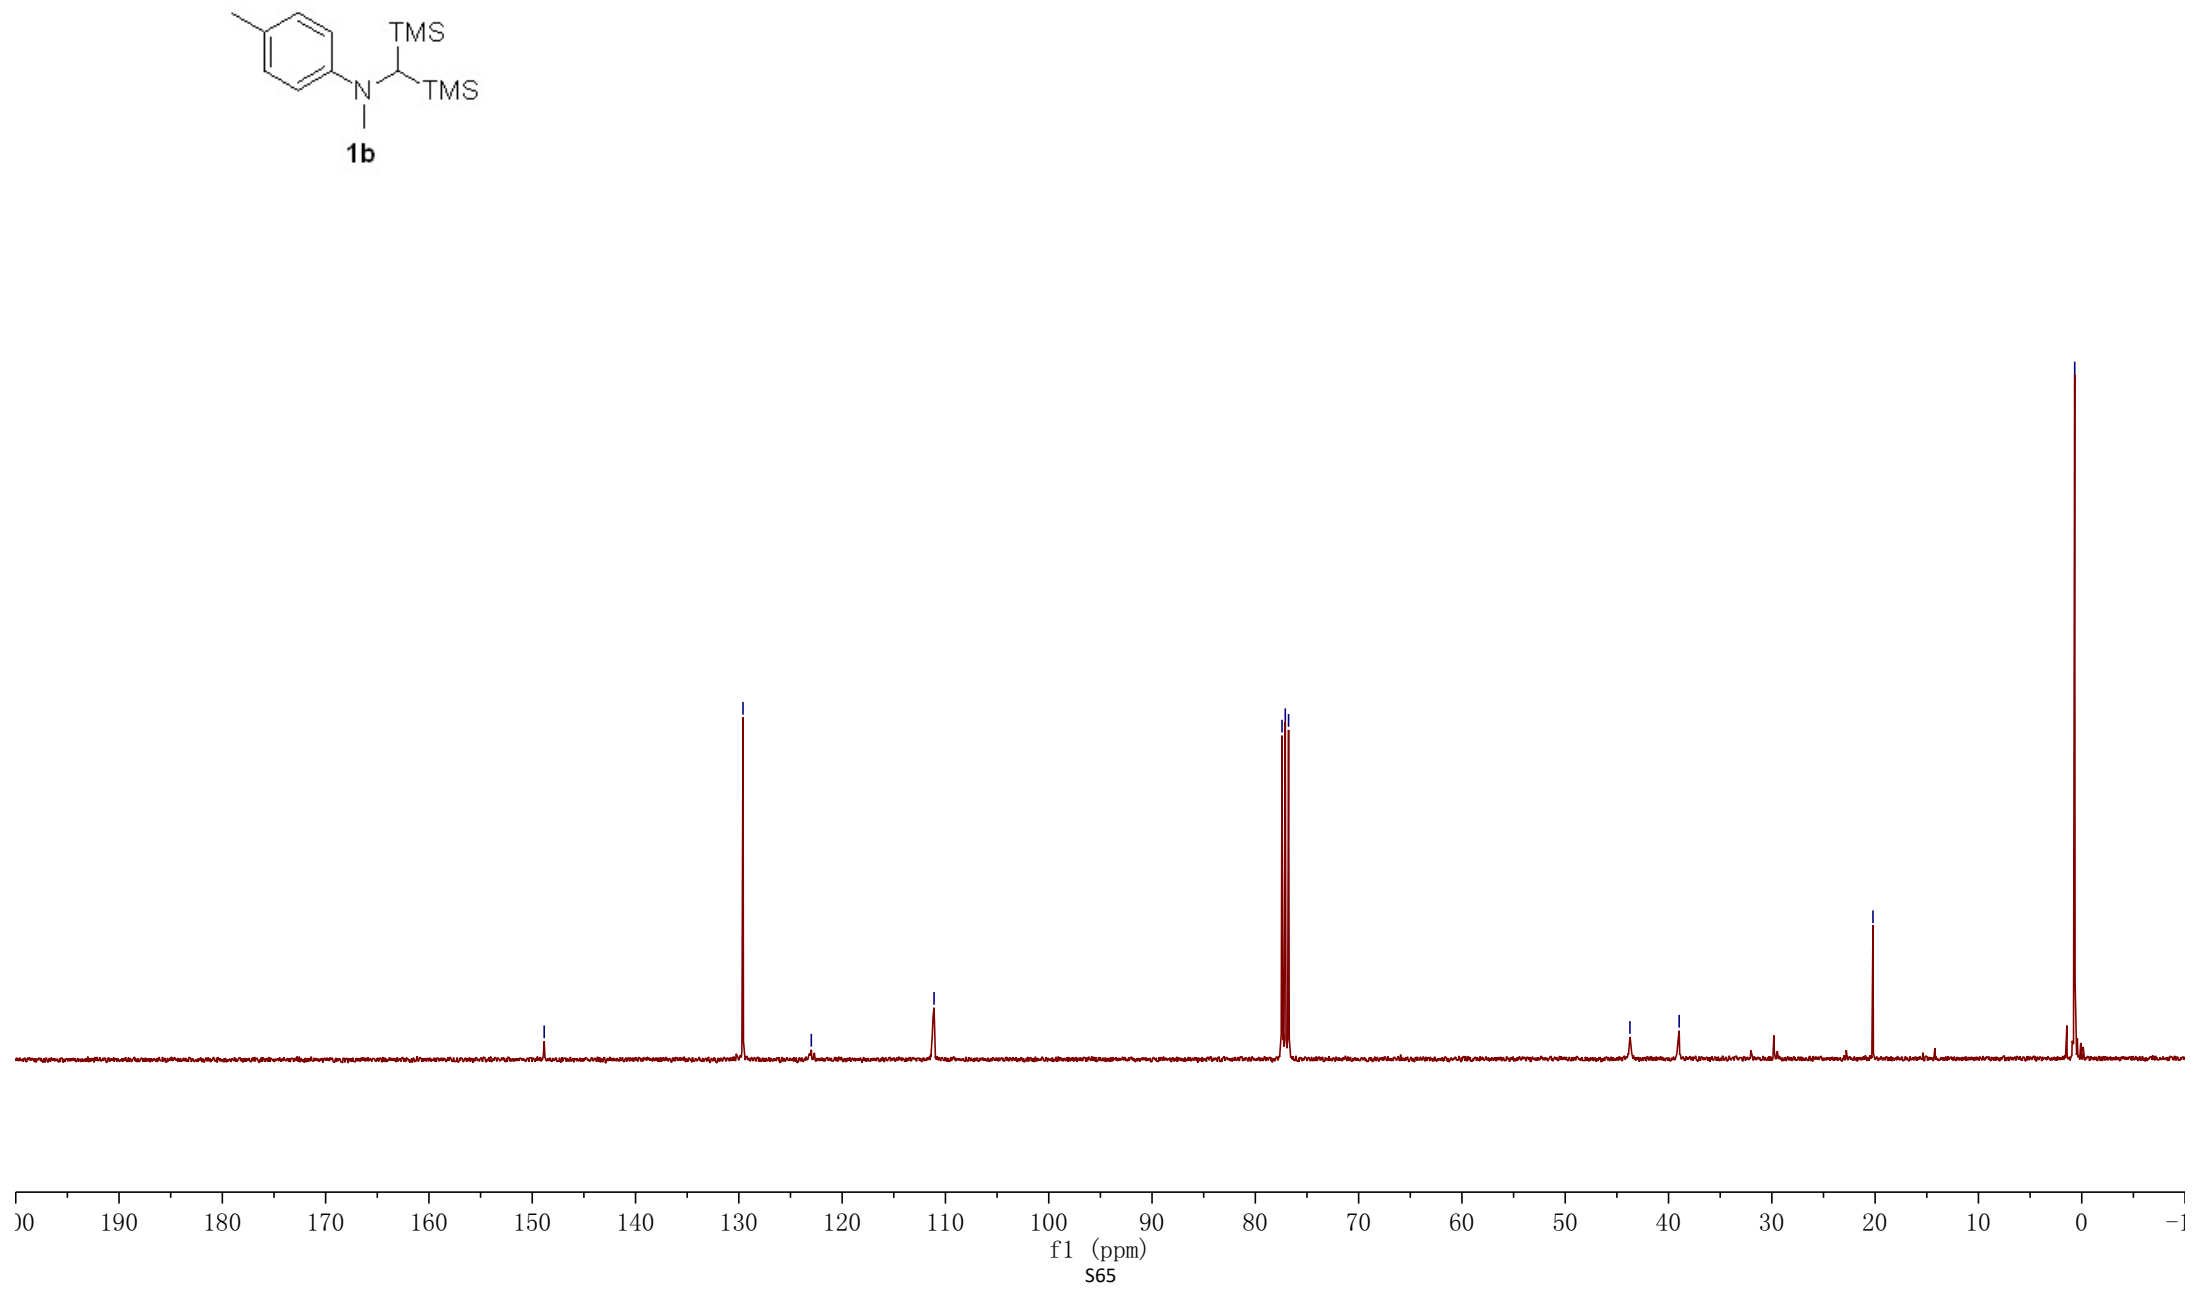

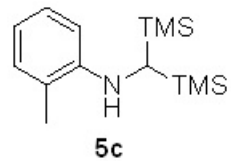

7.260  
7.172  
7.152  
7.133  
7.081  
7.062  
6.612  
6.594  
6.577

3.278  
2.603  
2.199

0.154

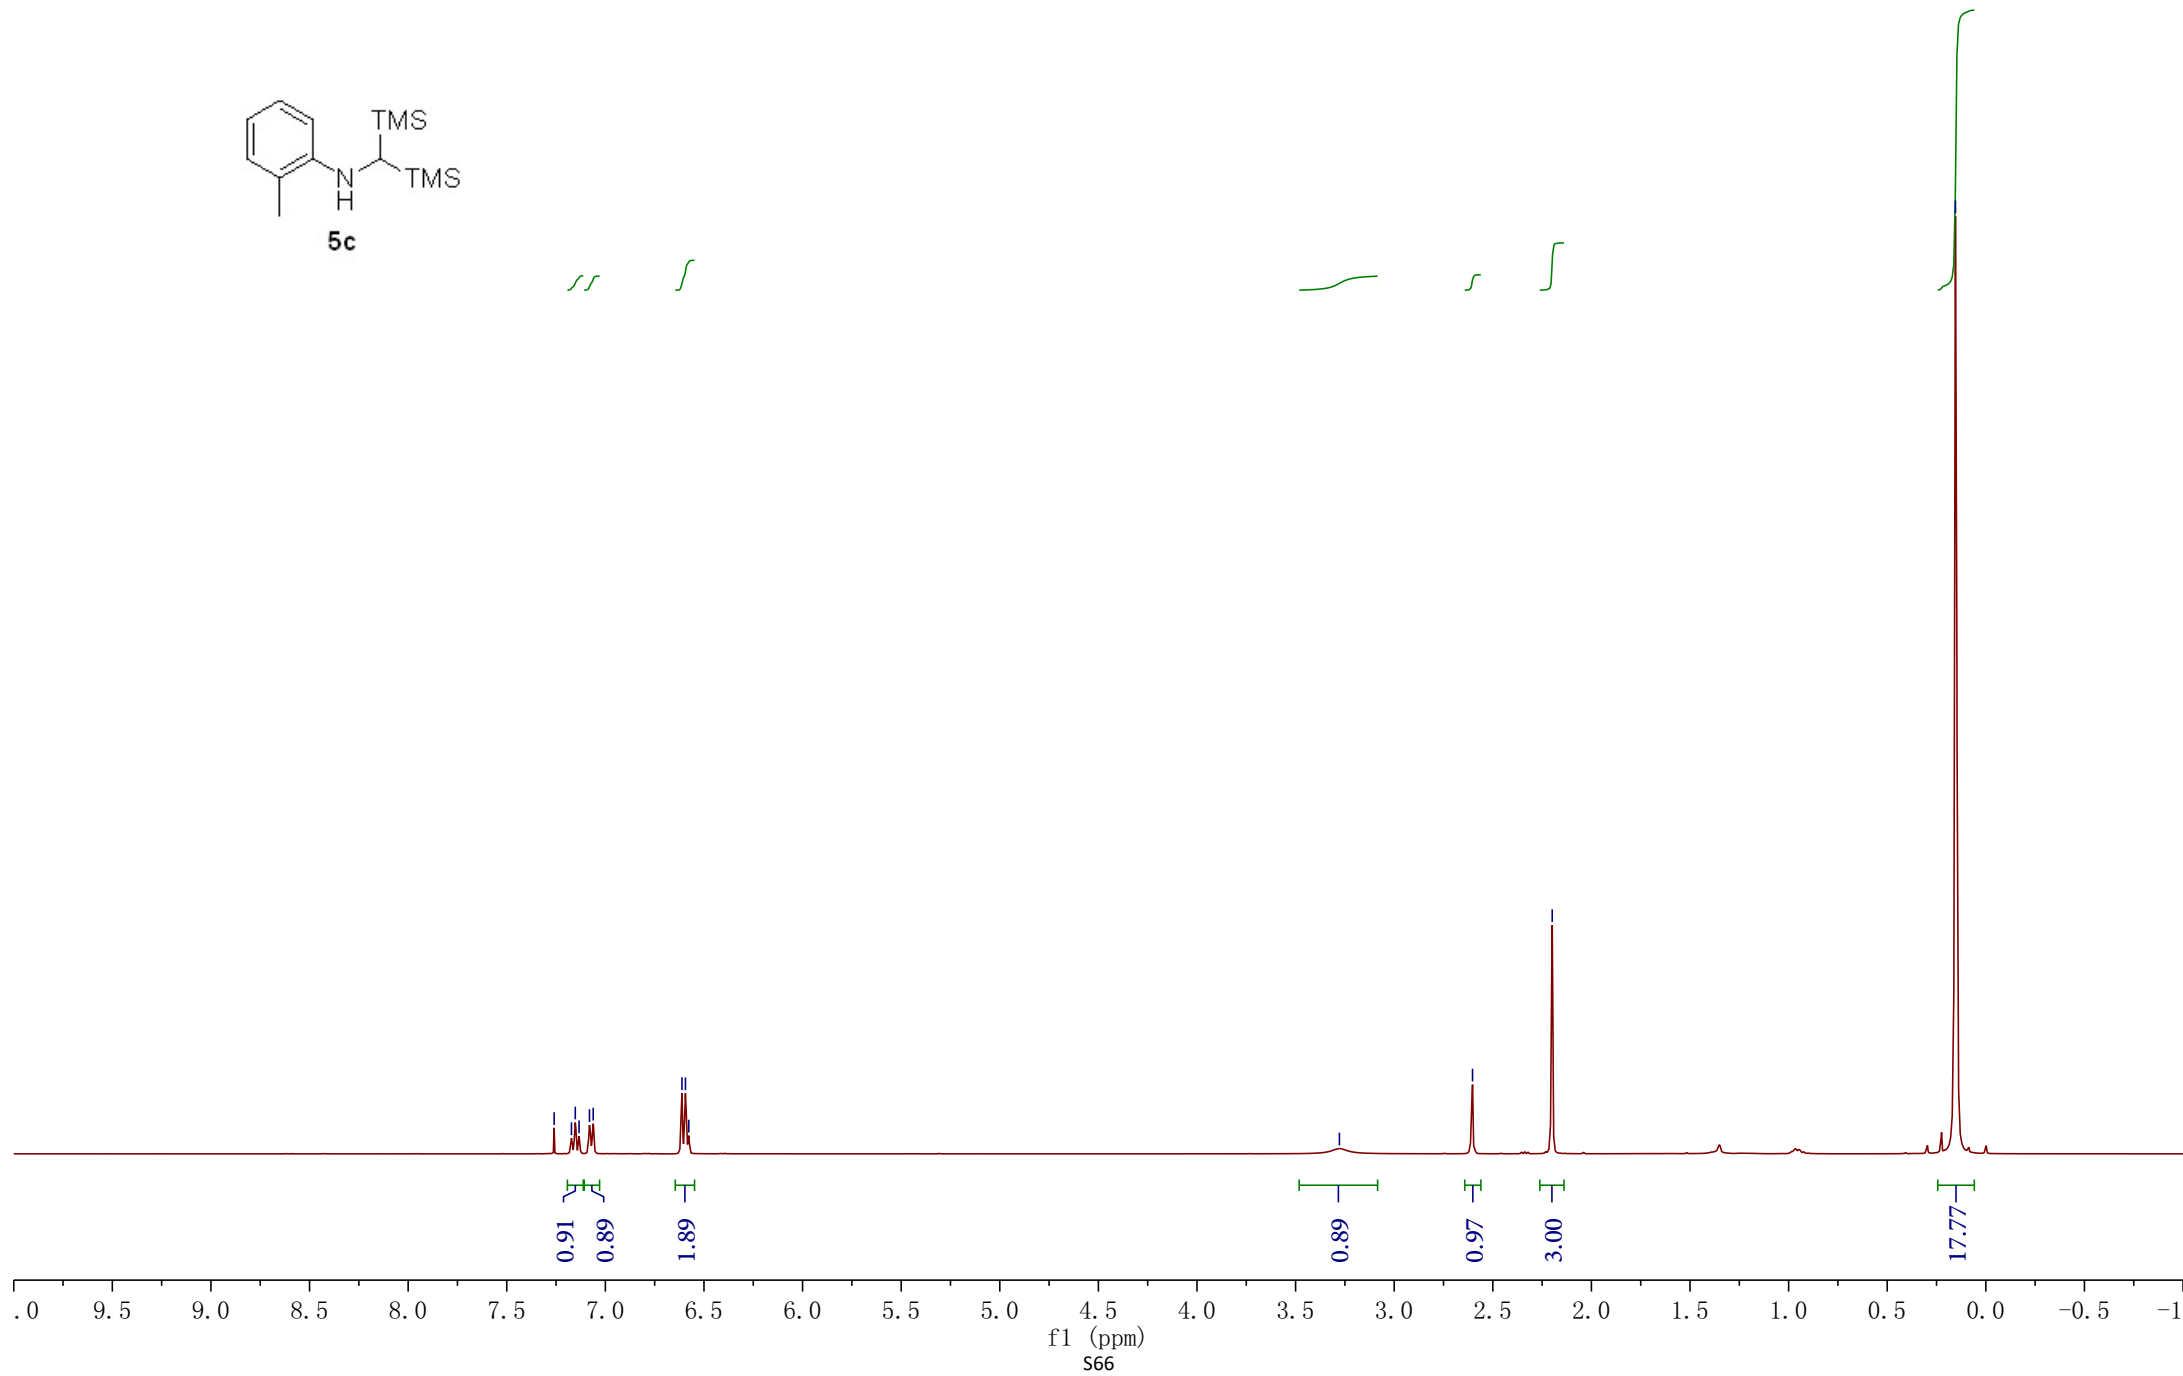

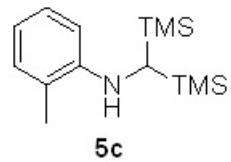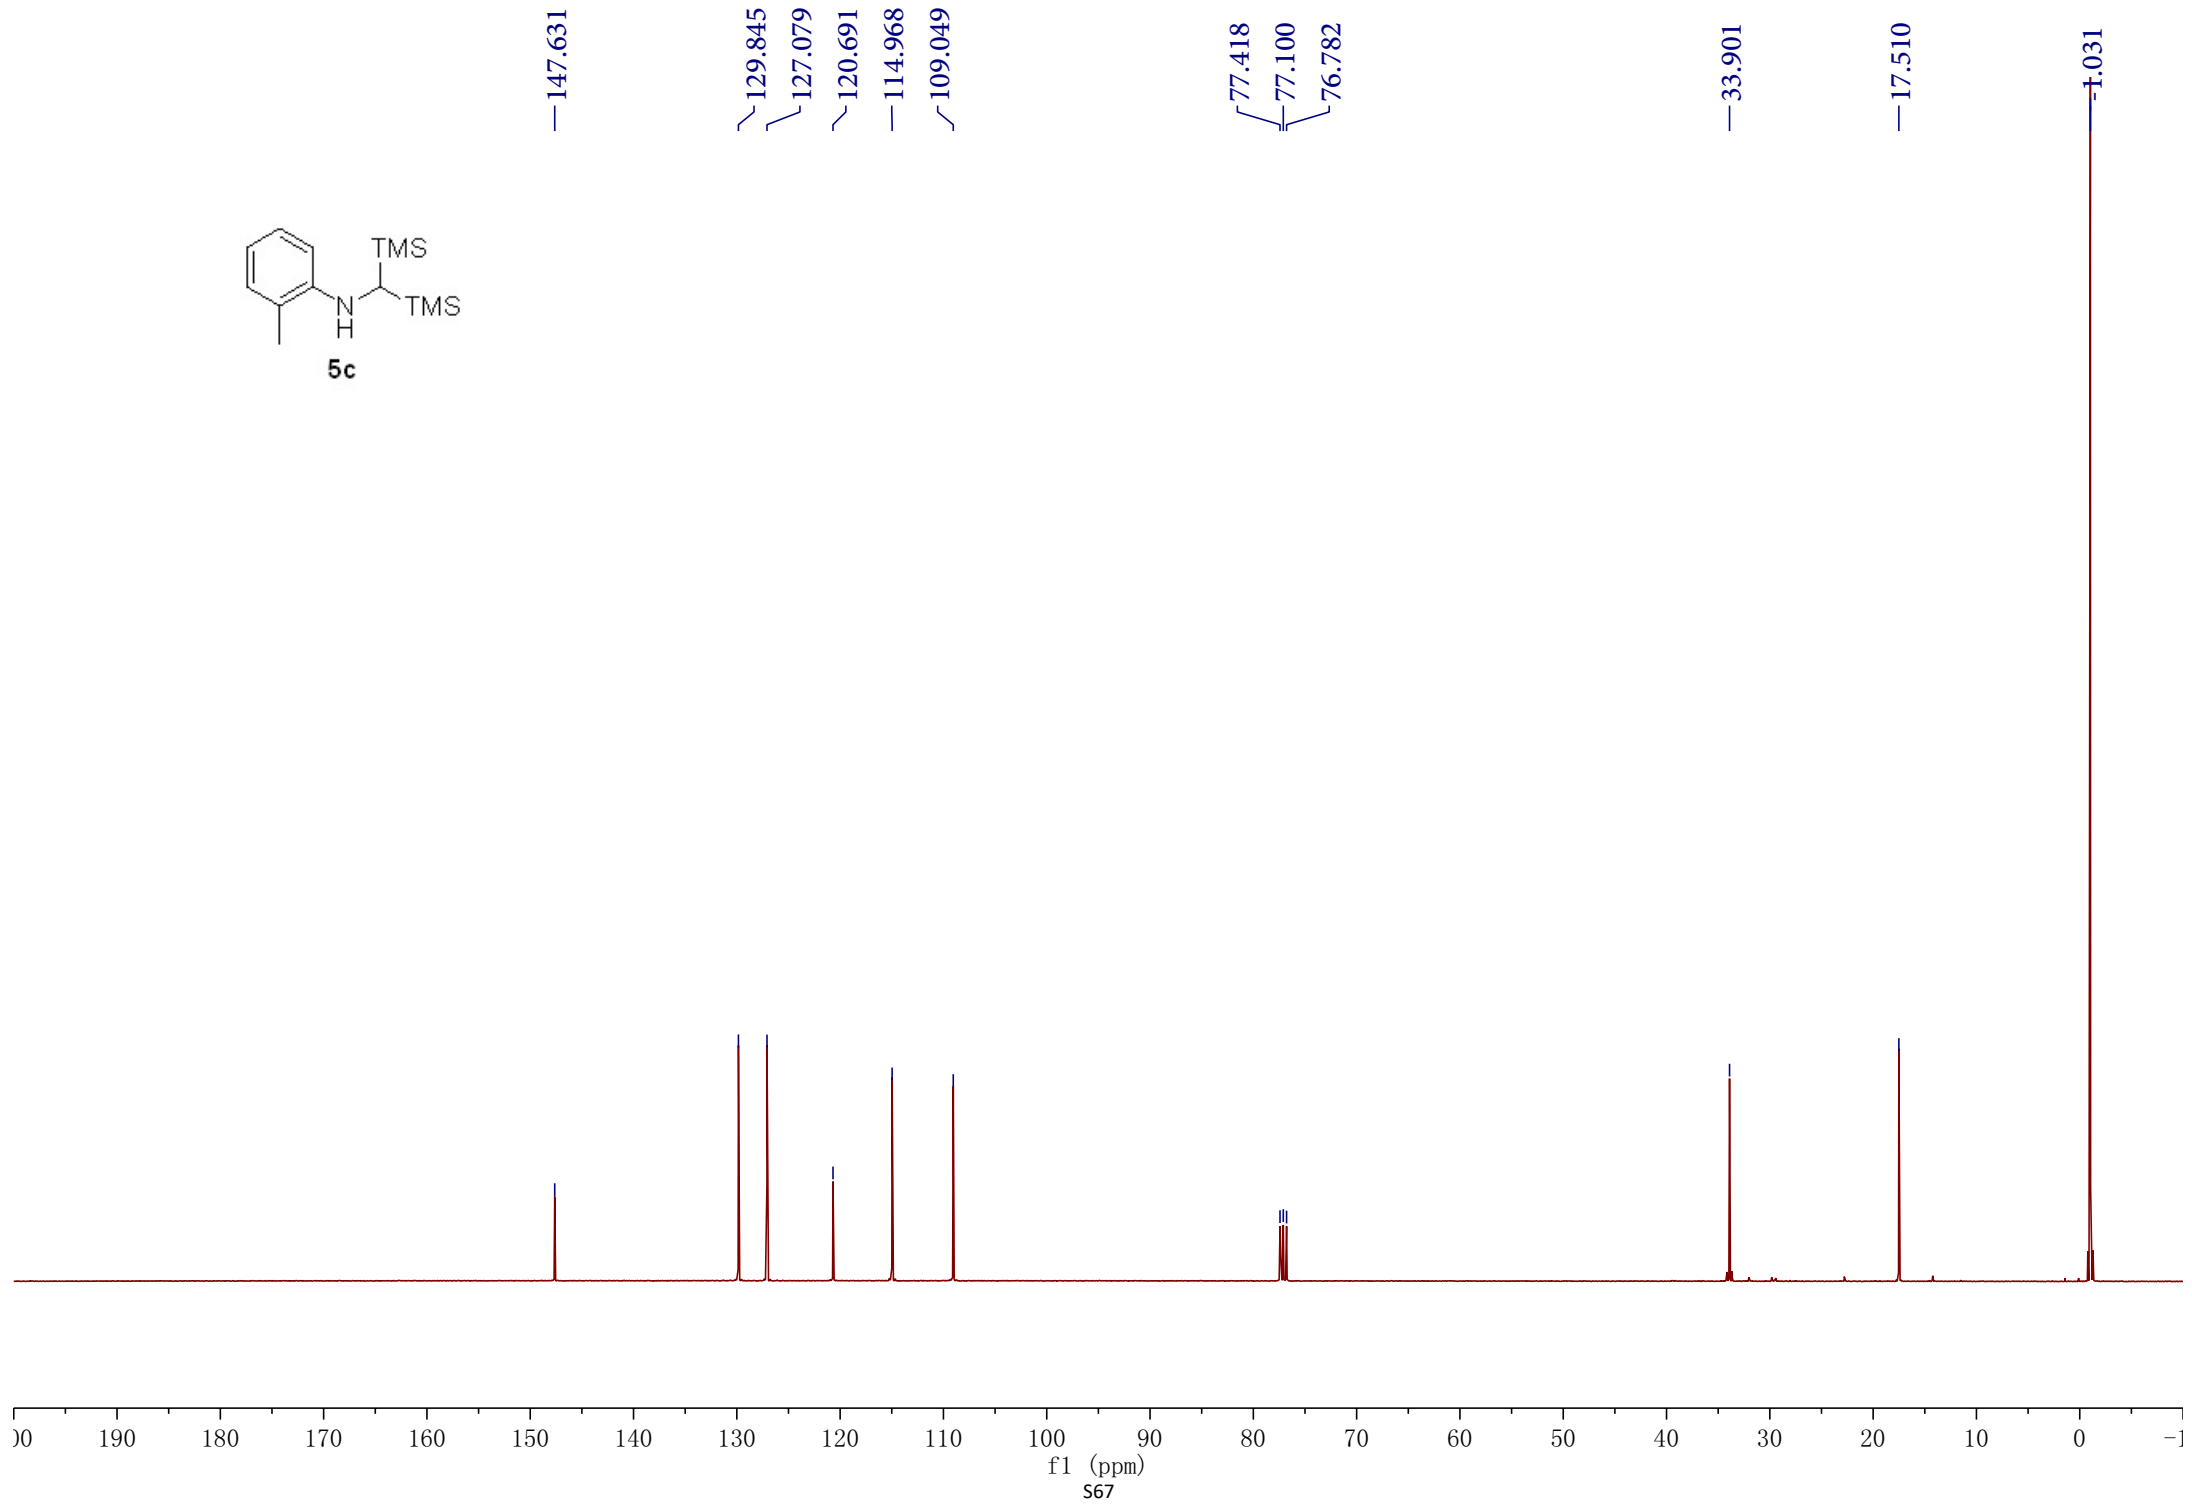

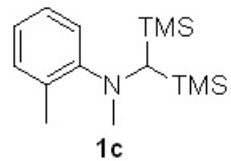

7.260  
7.096  
7.080  
7.062  
7.000  
6.979  
6.976  
6.811  
6.808  
6.792  
6.790  
6.774  
6.771

2.904  
2.635  
2.286

-0.119

s s s

s s s

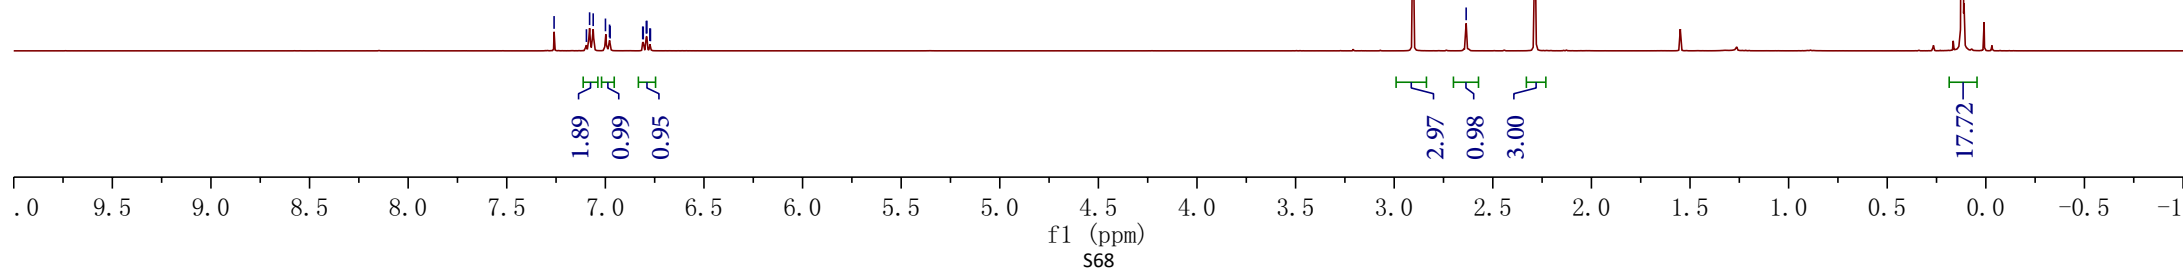

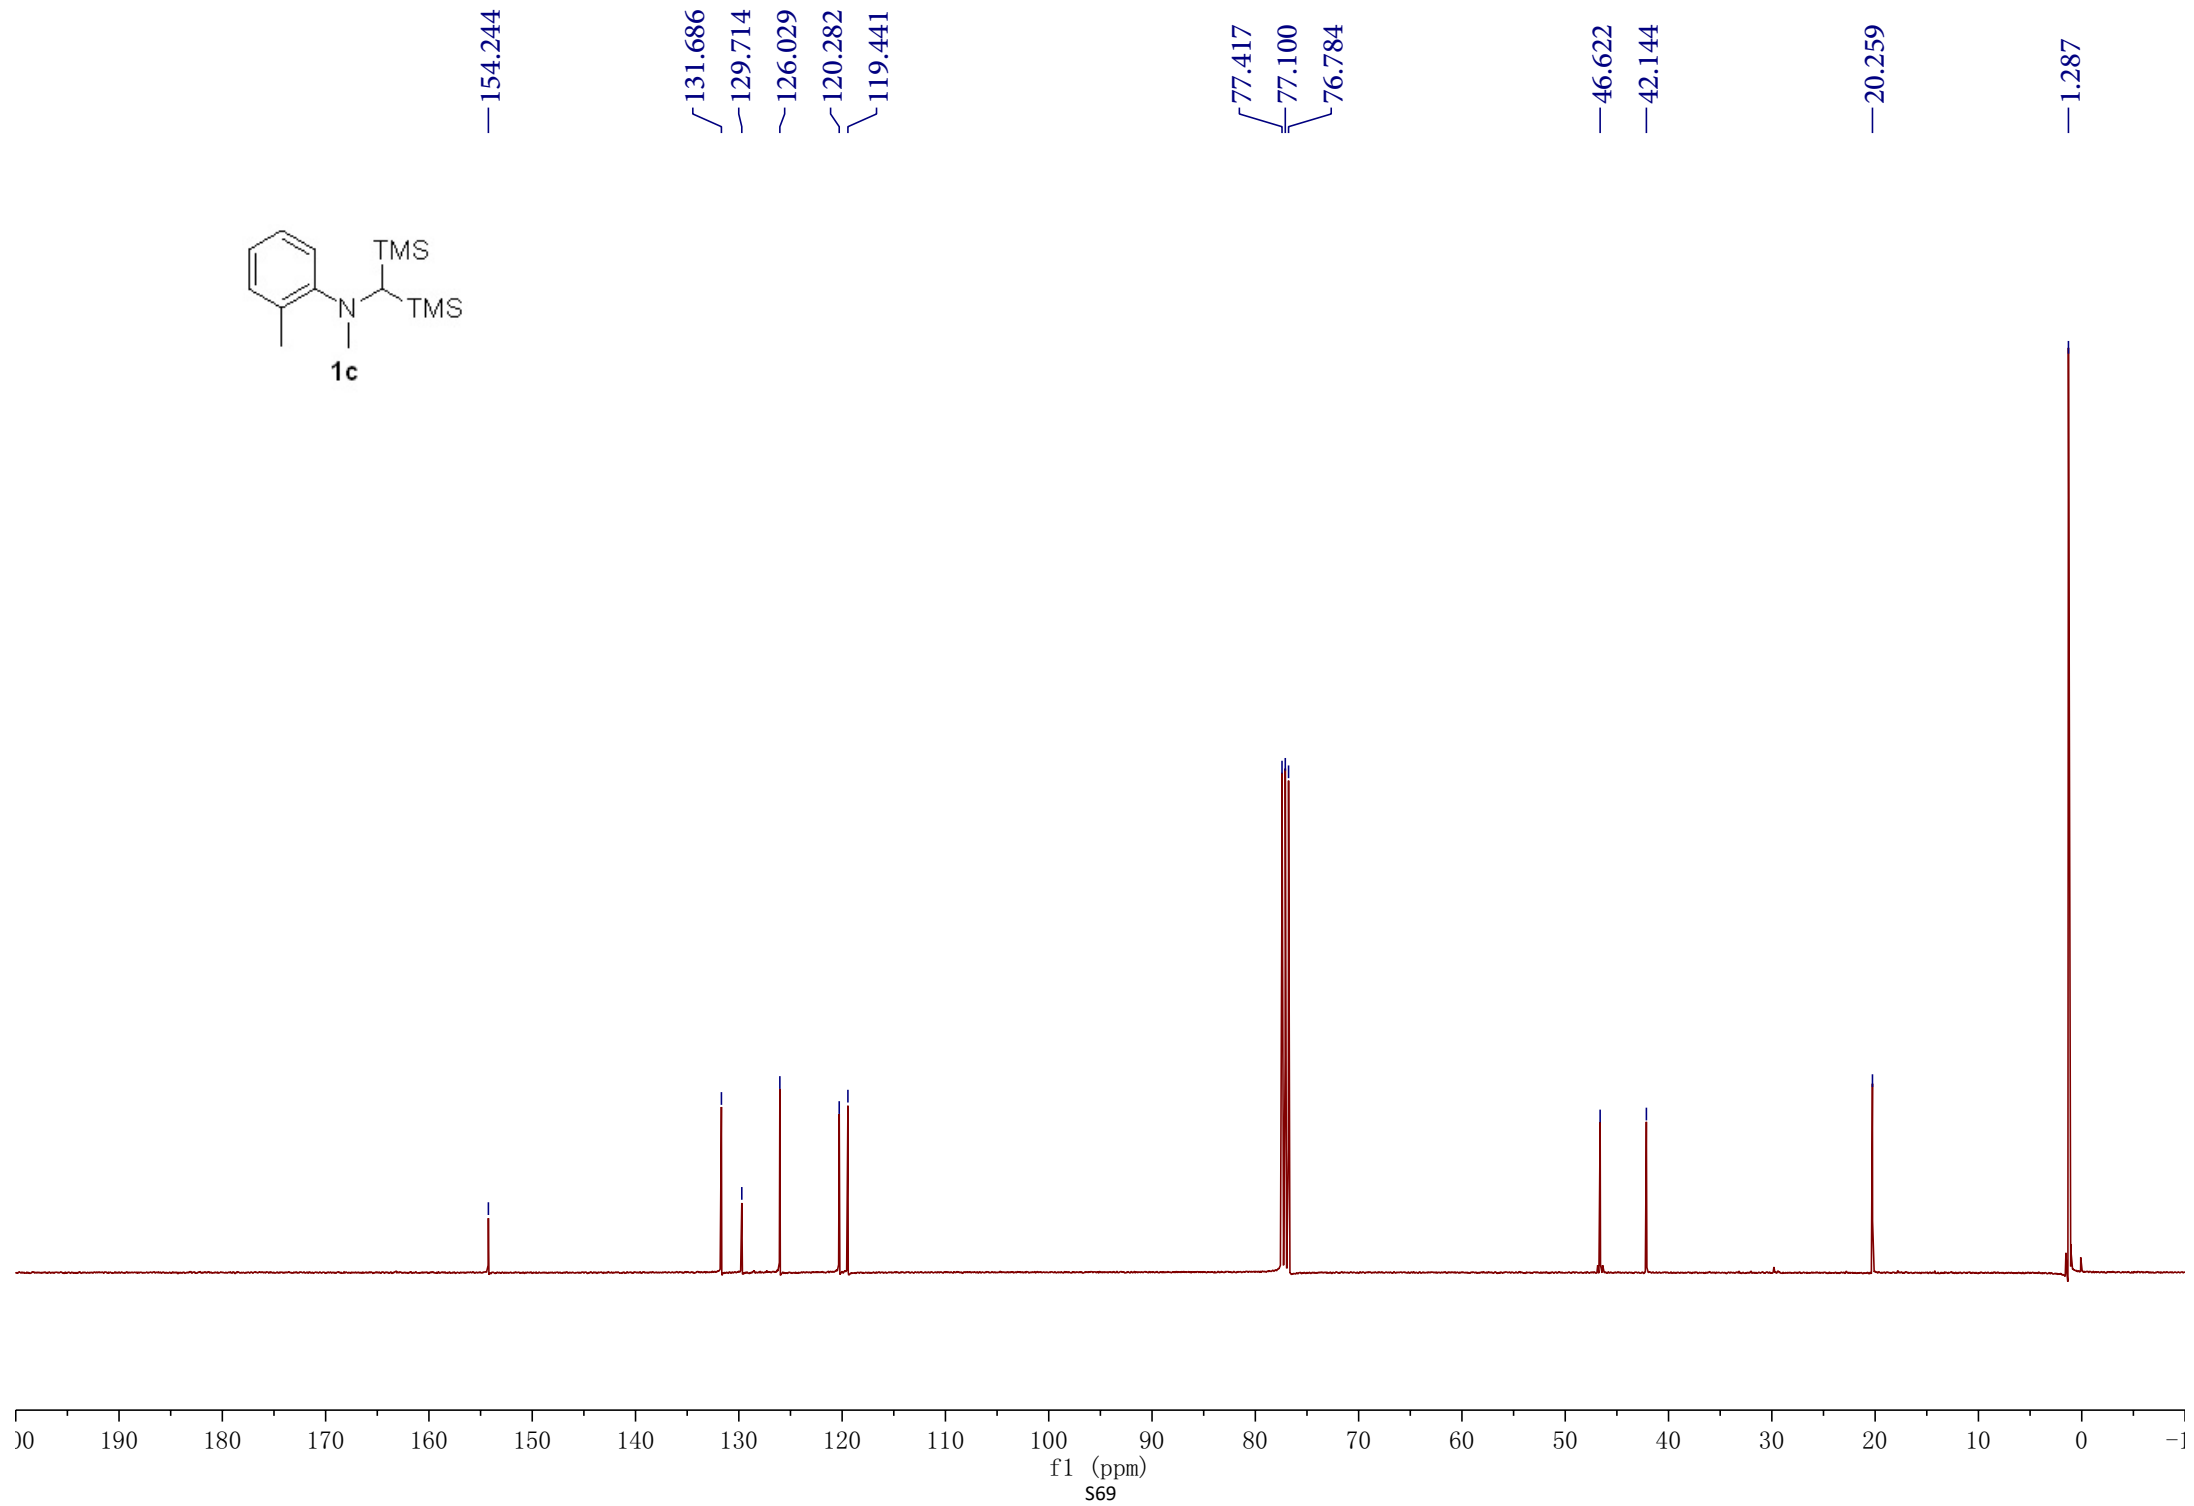

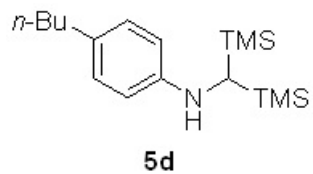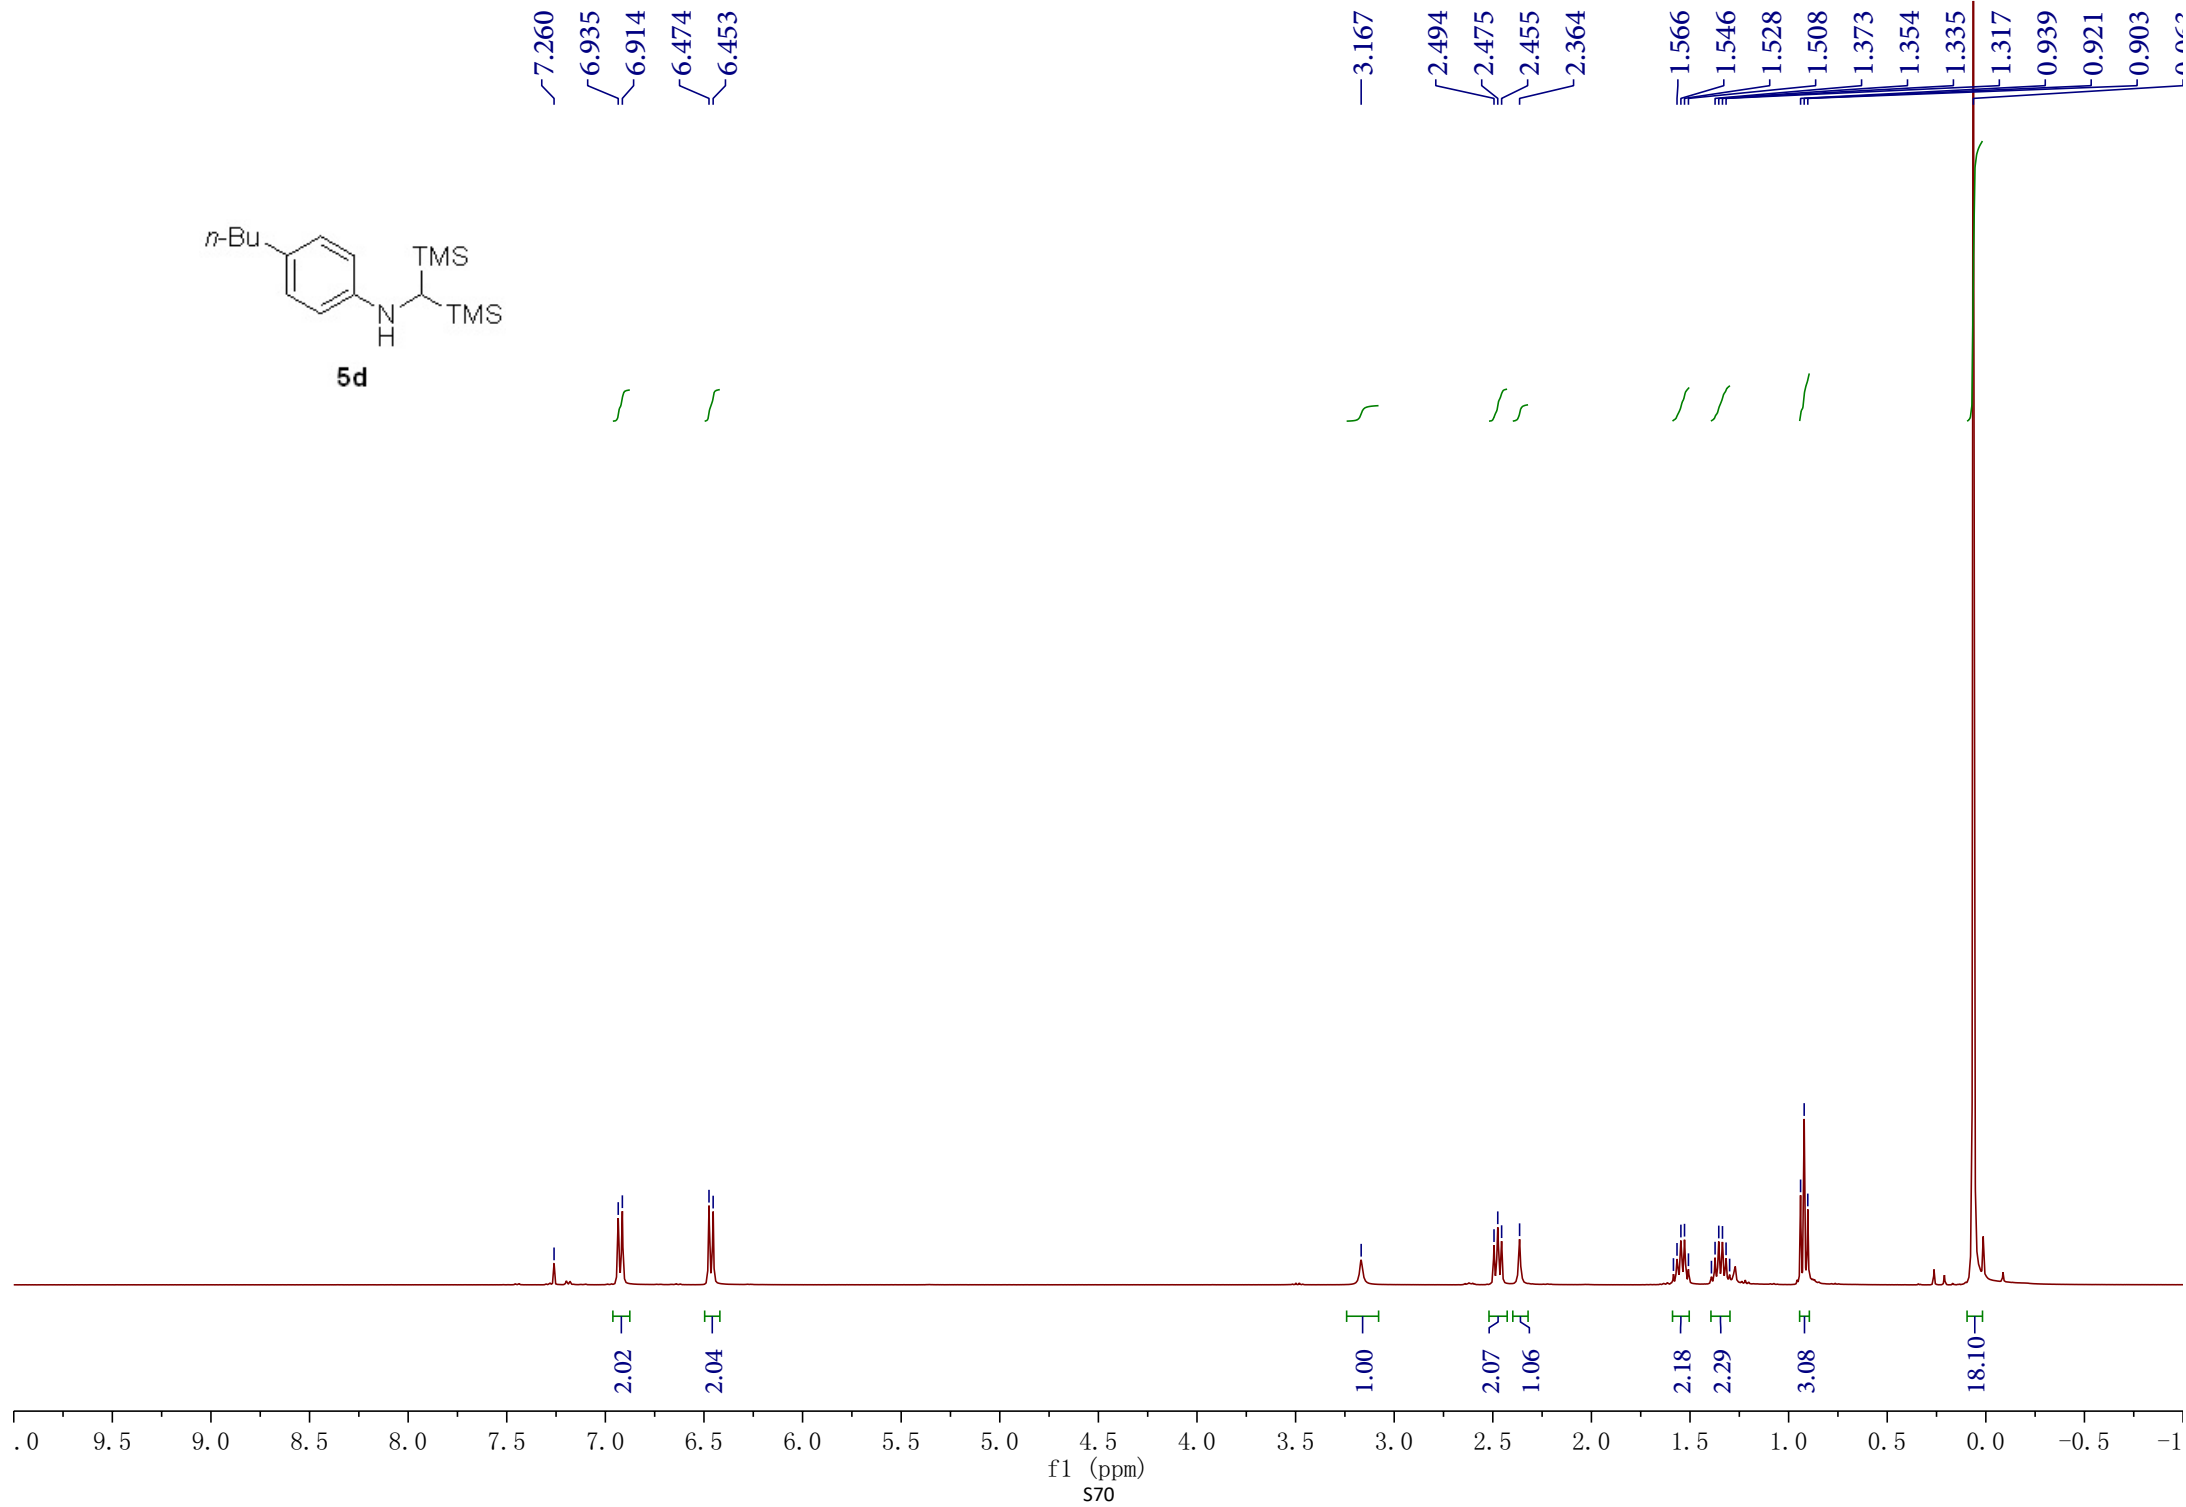

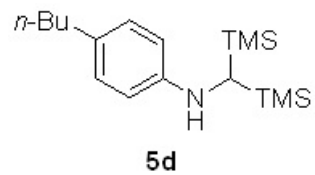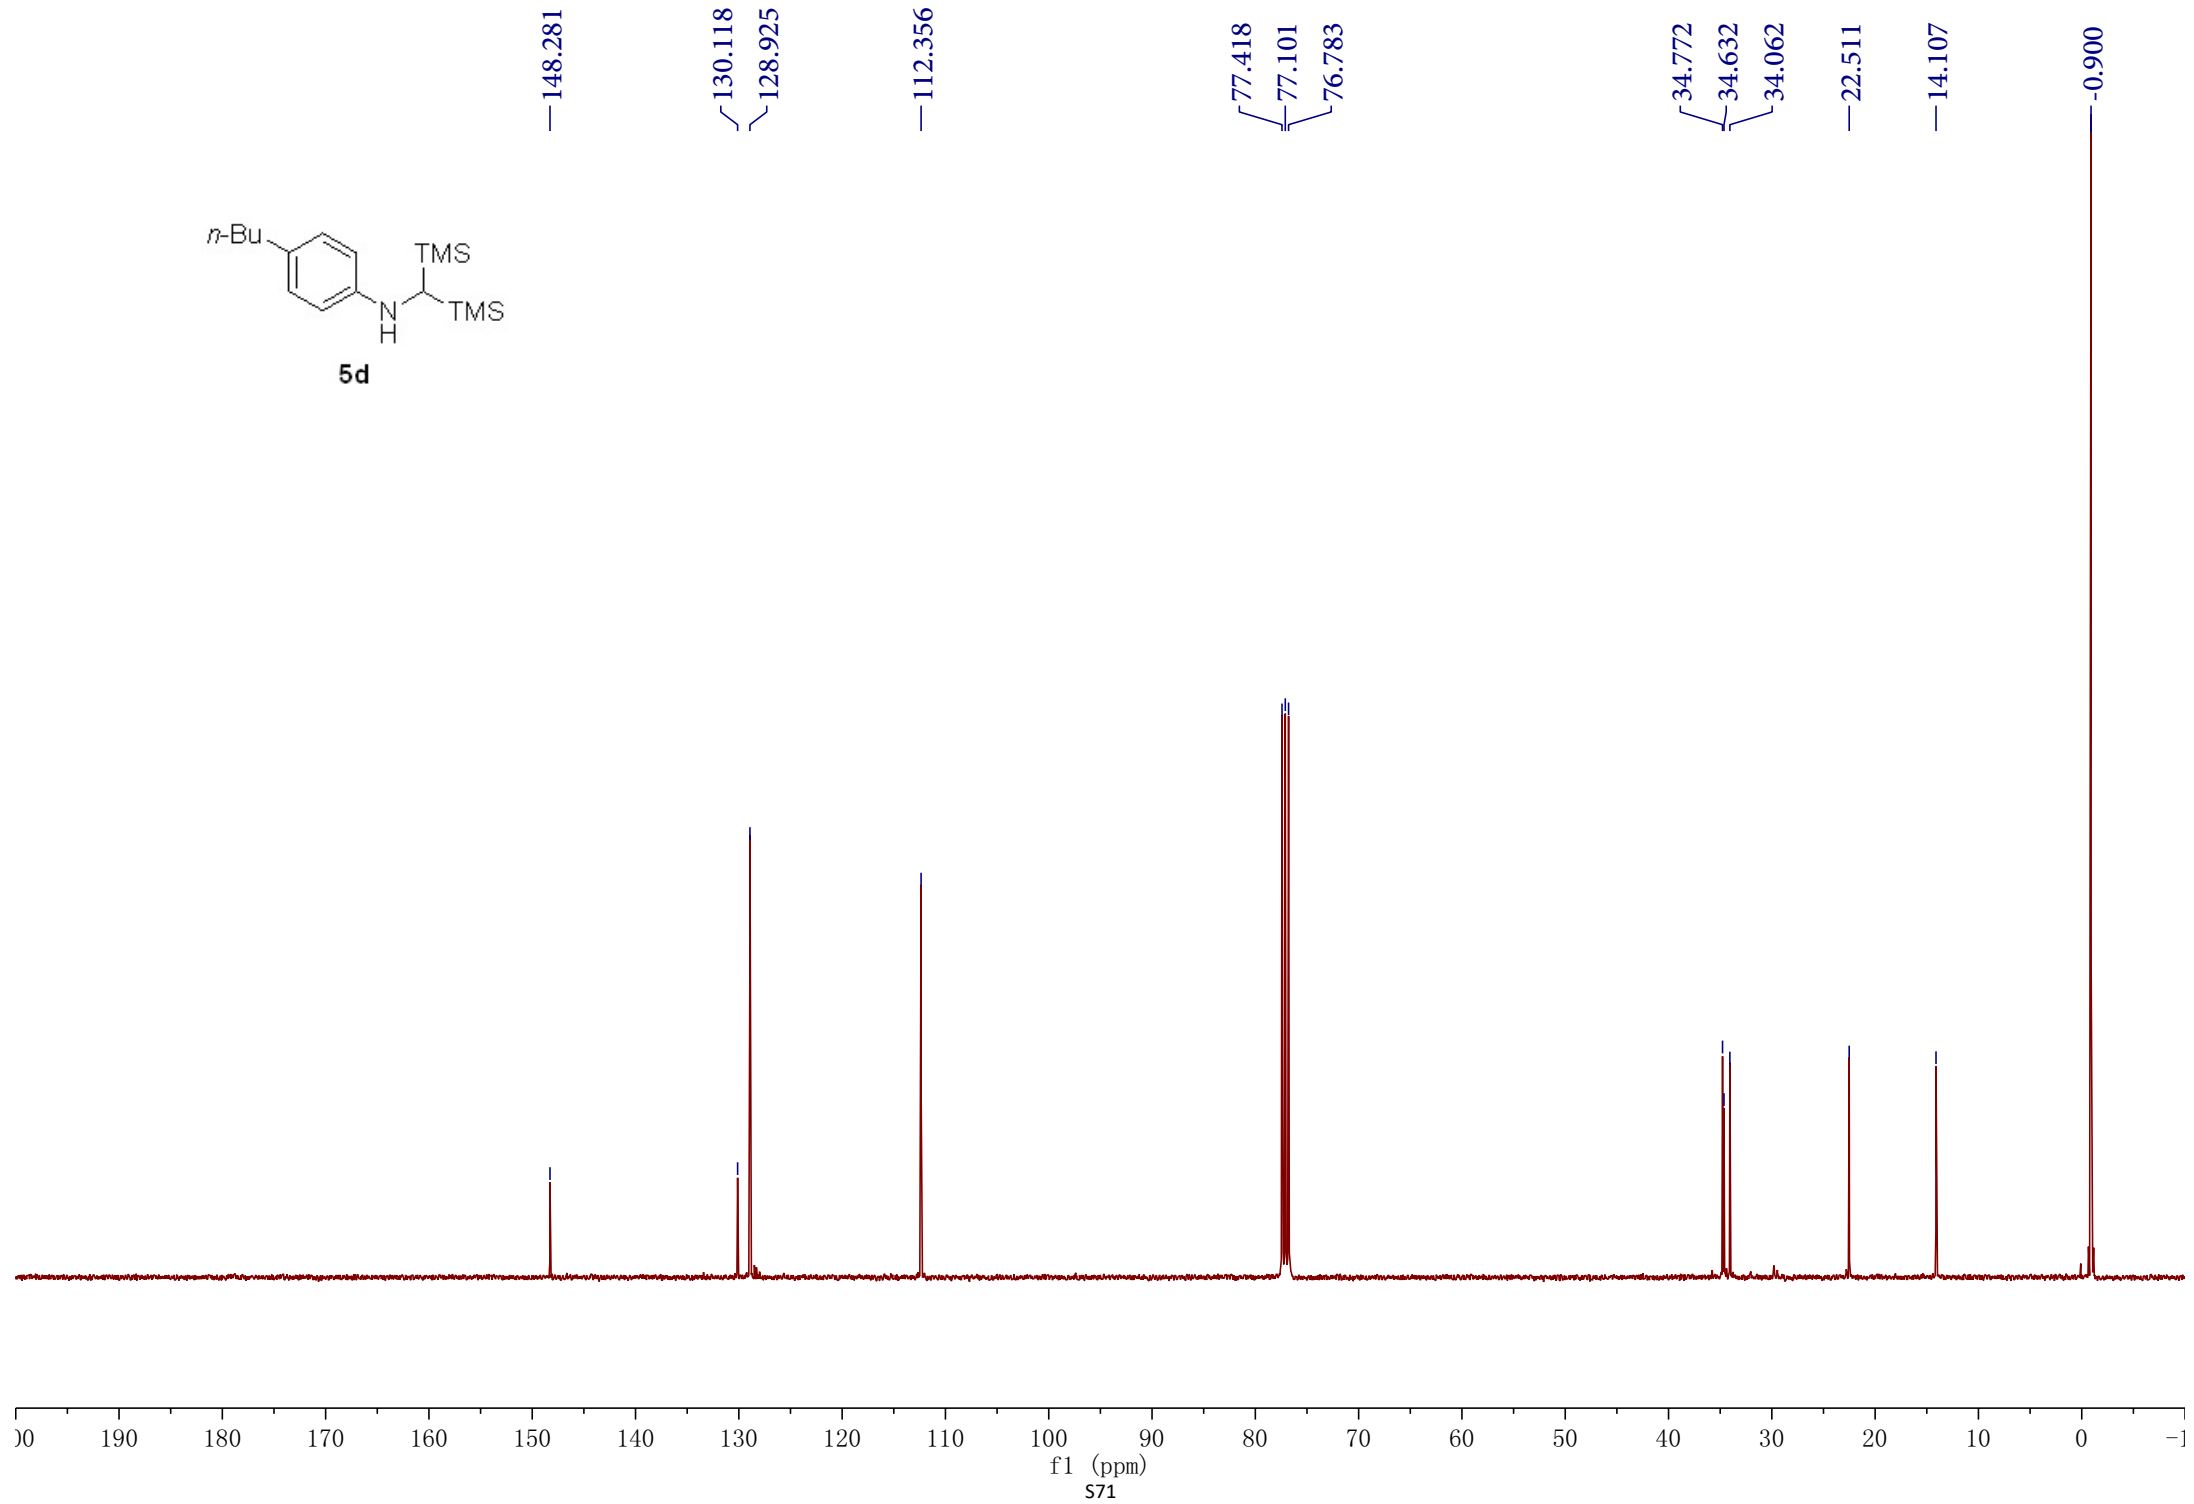

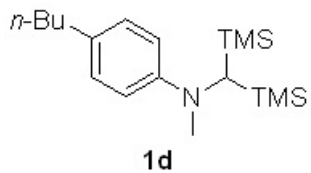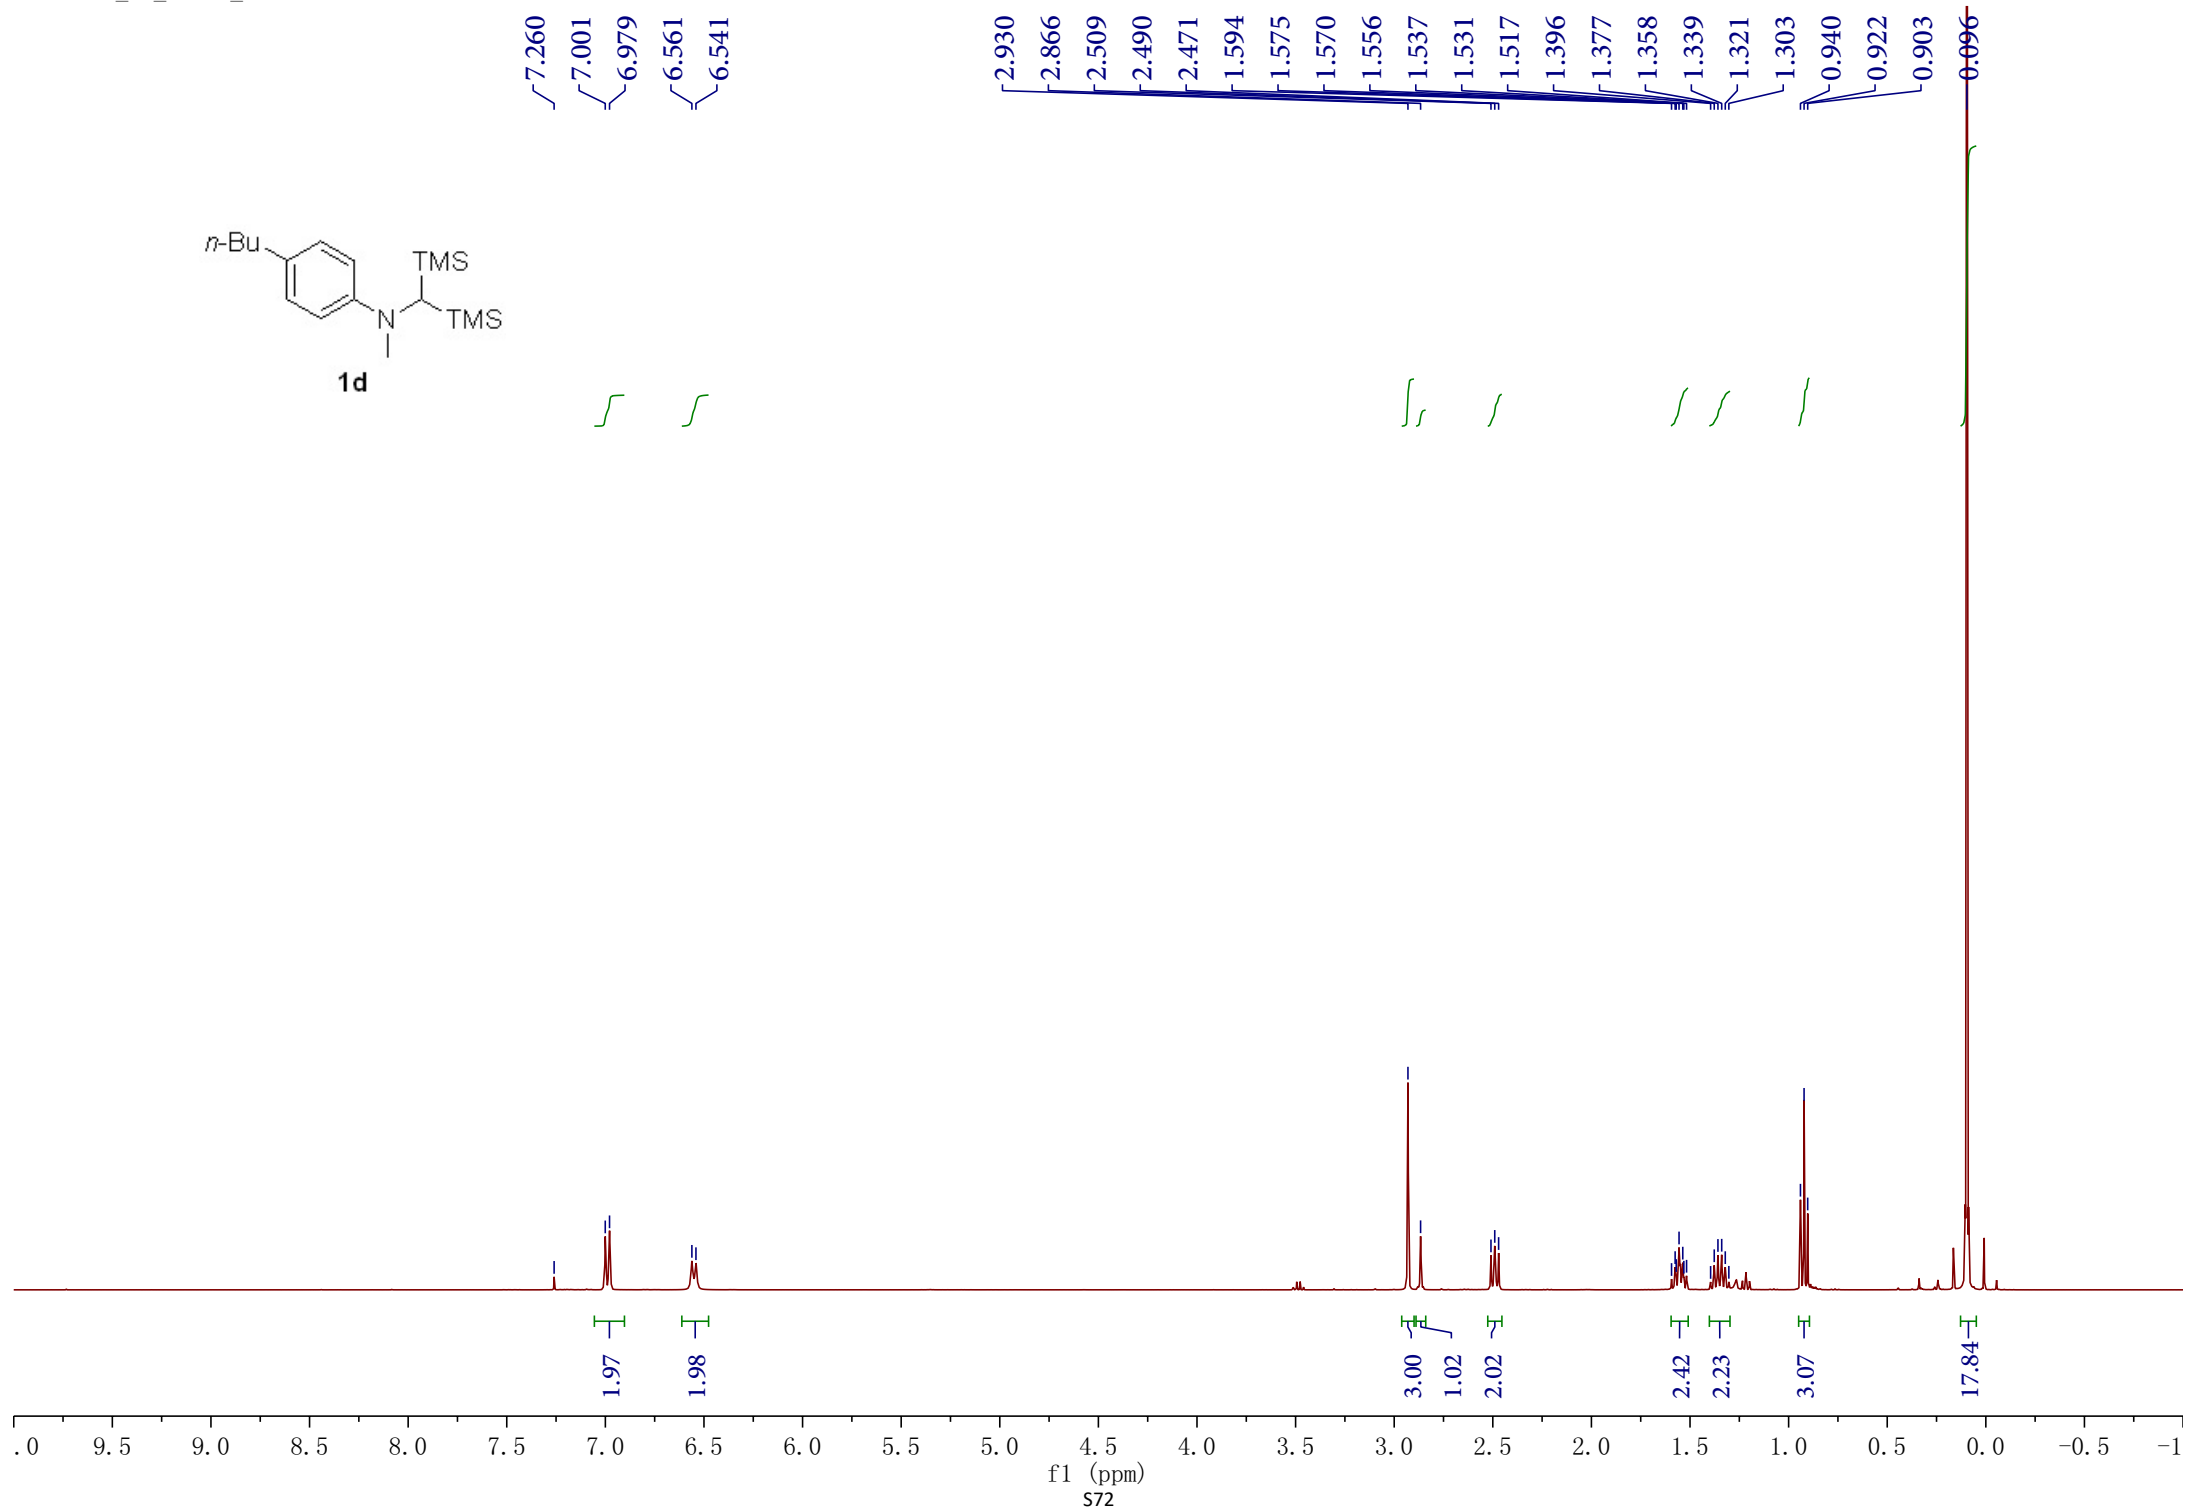



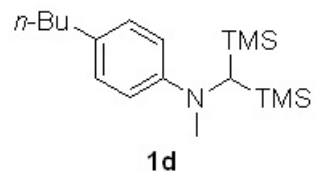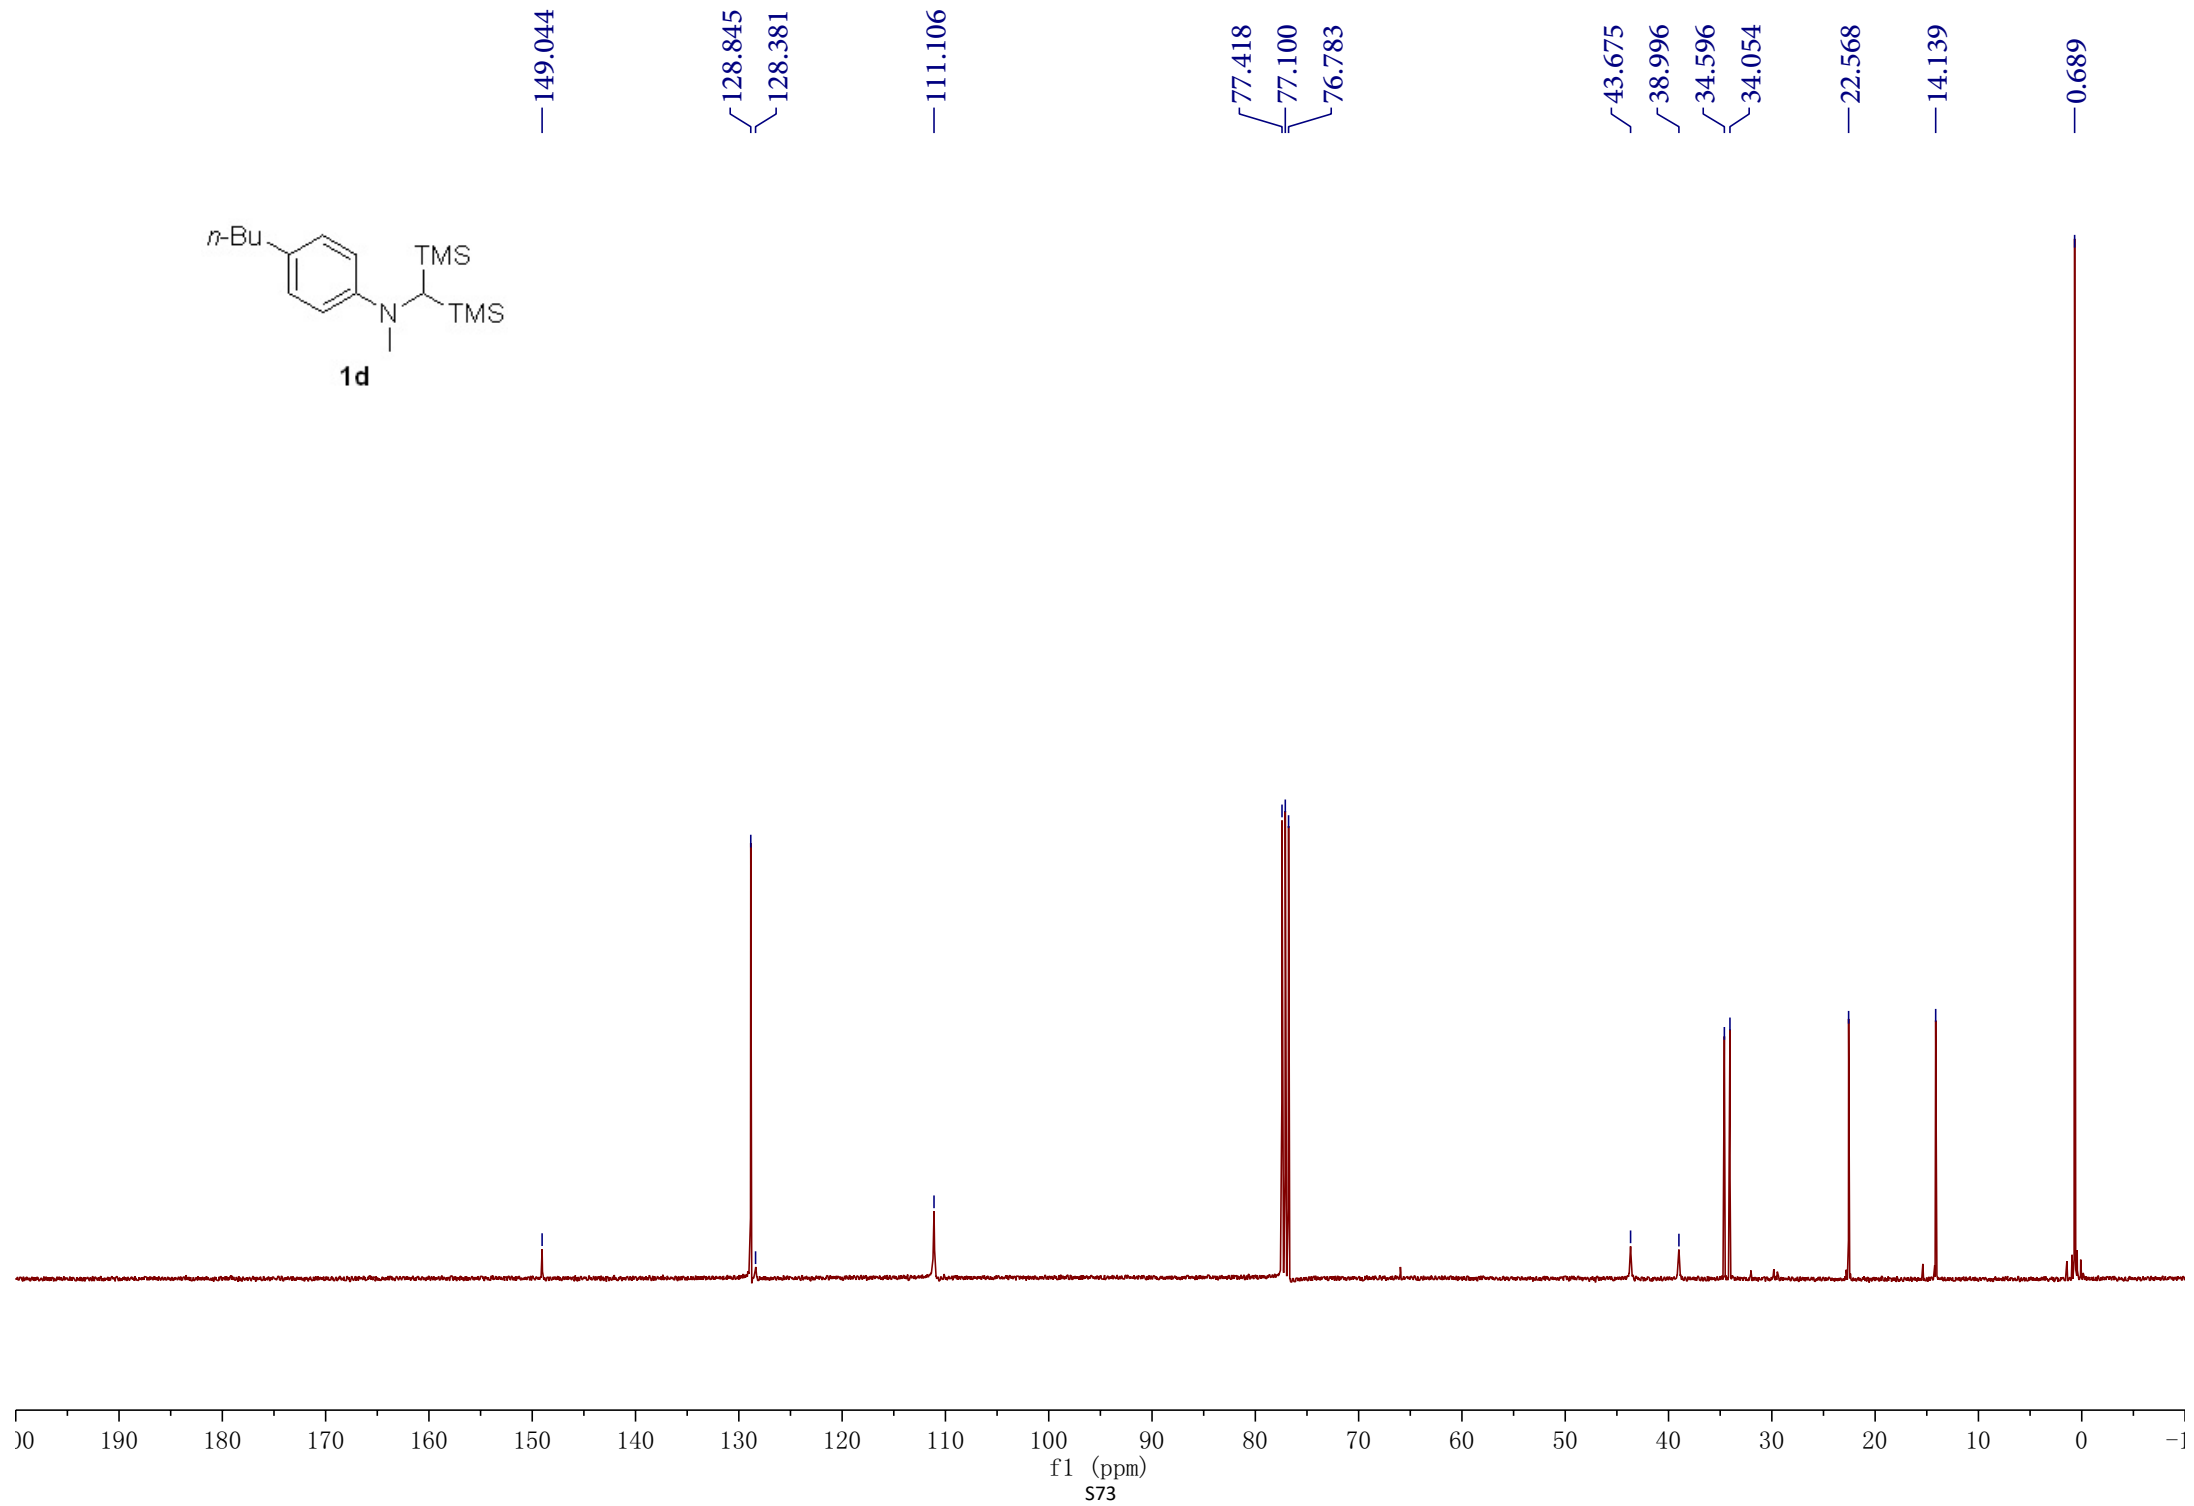

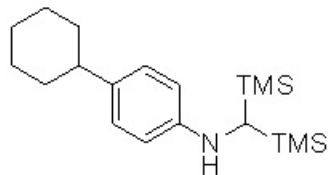

5e

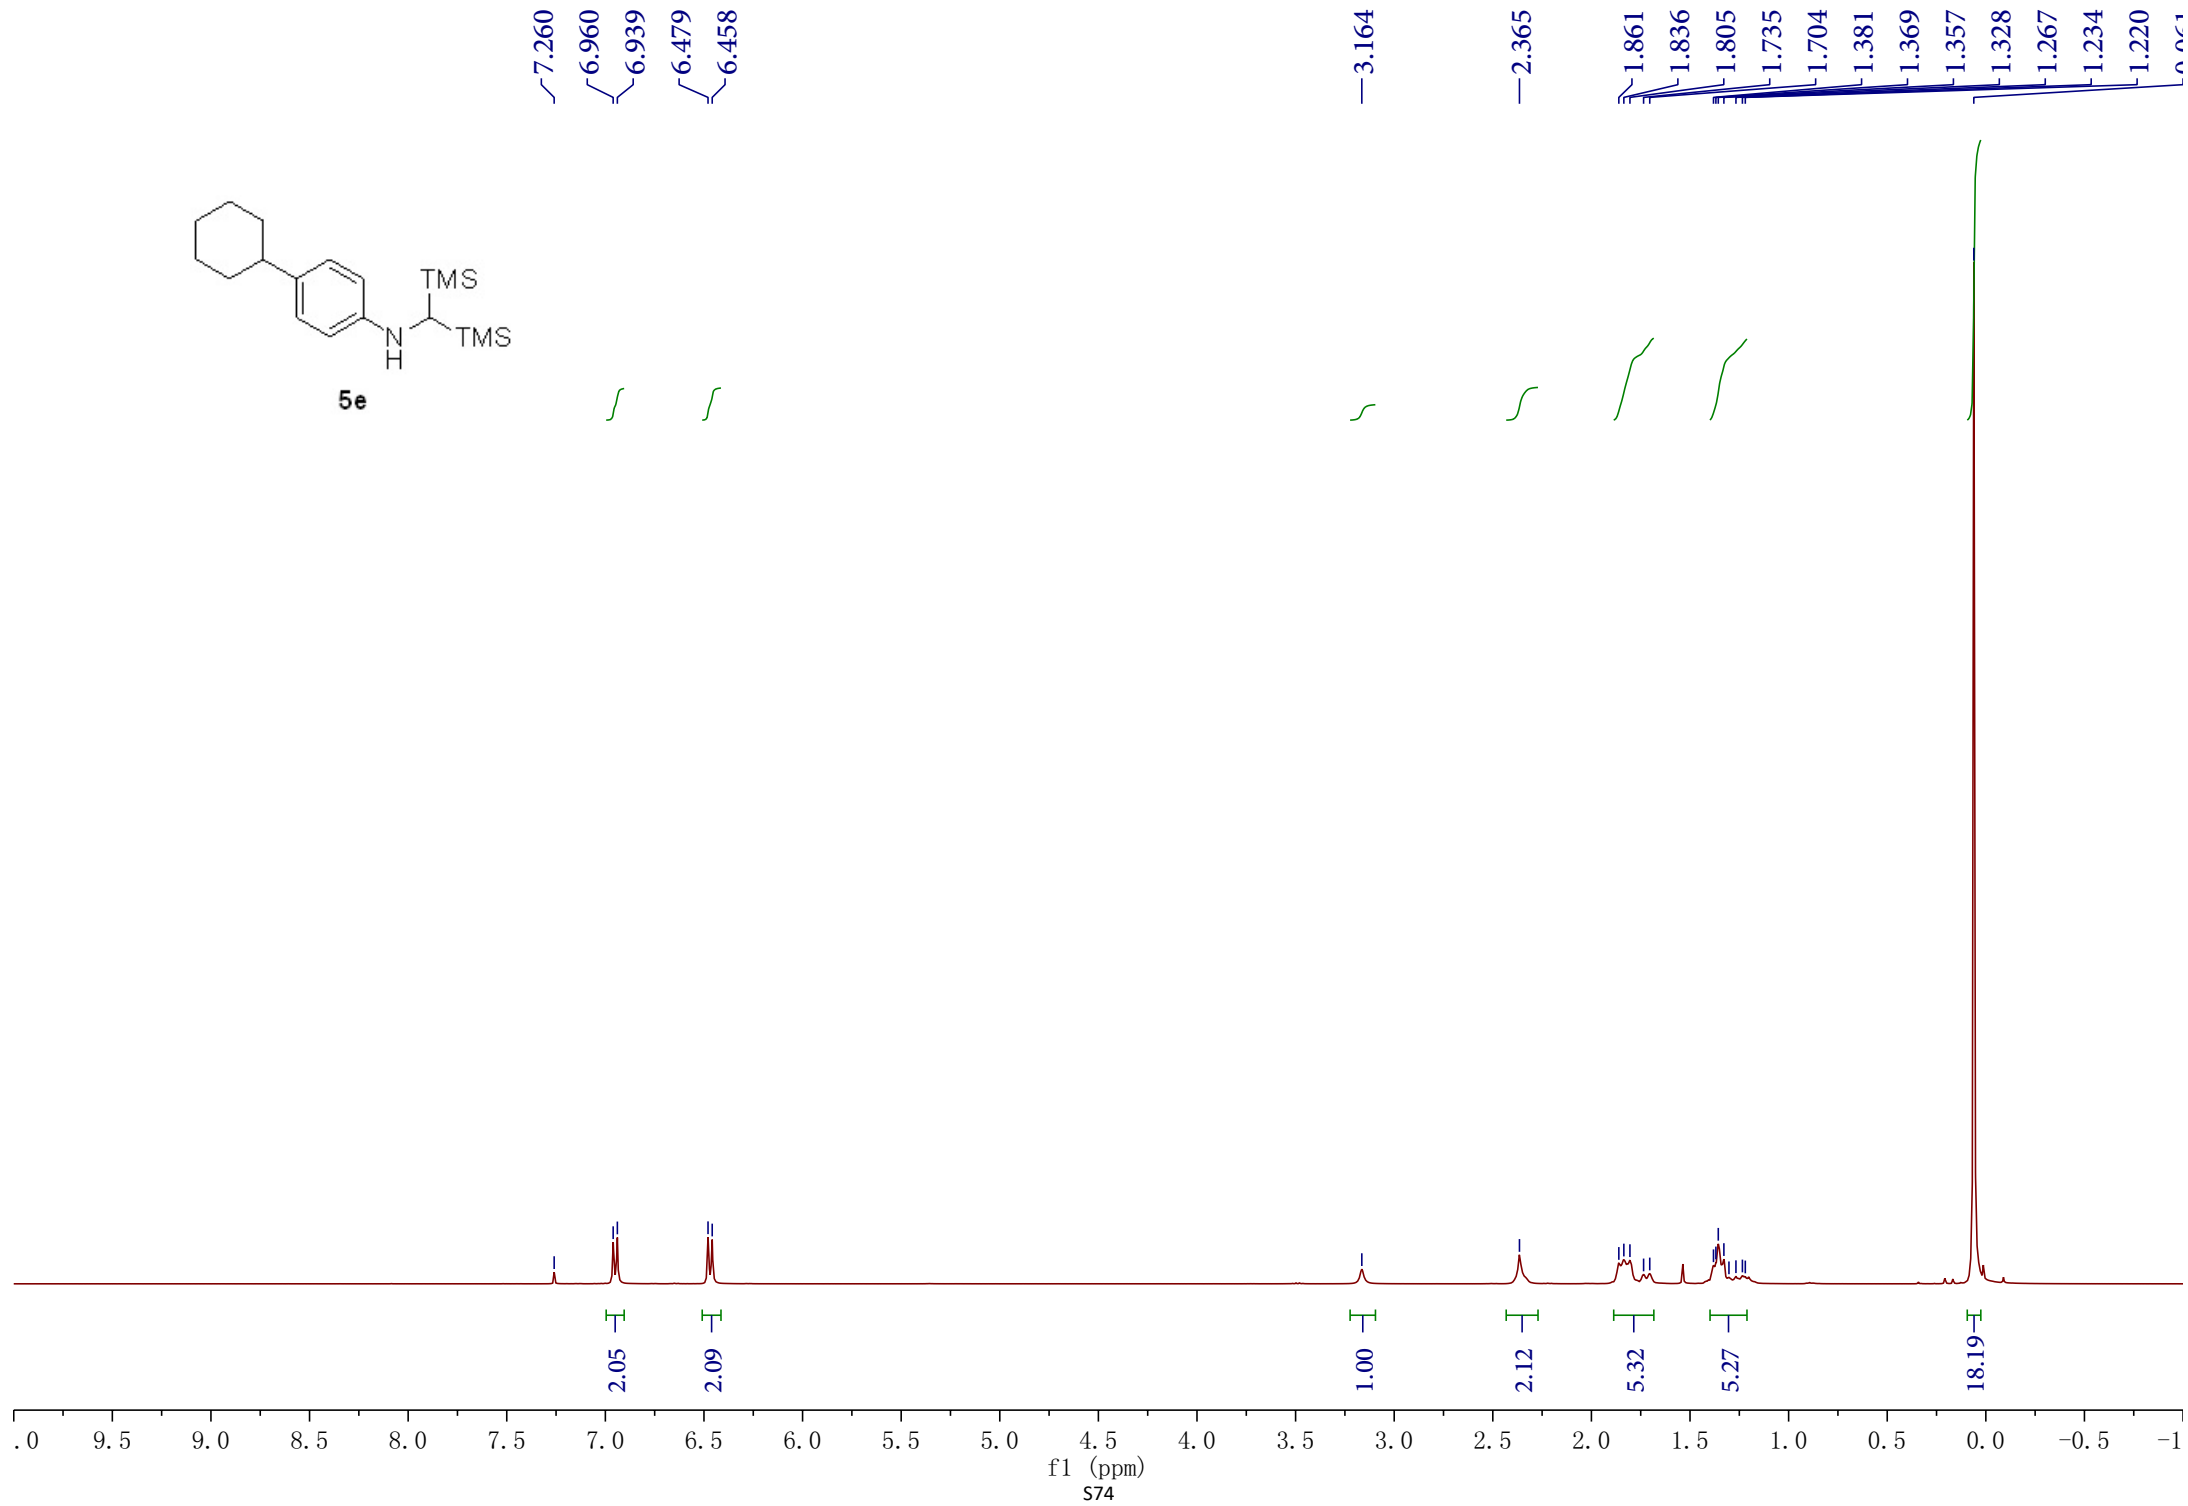

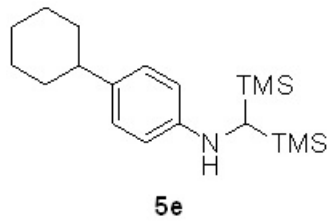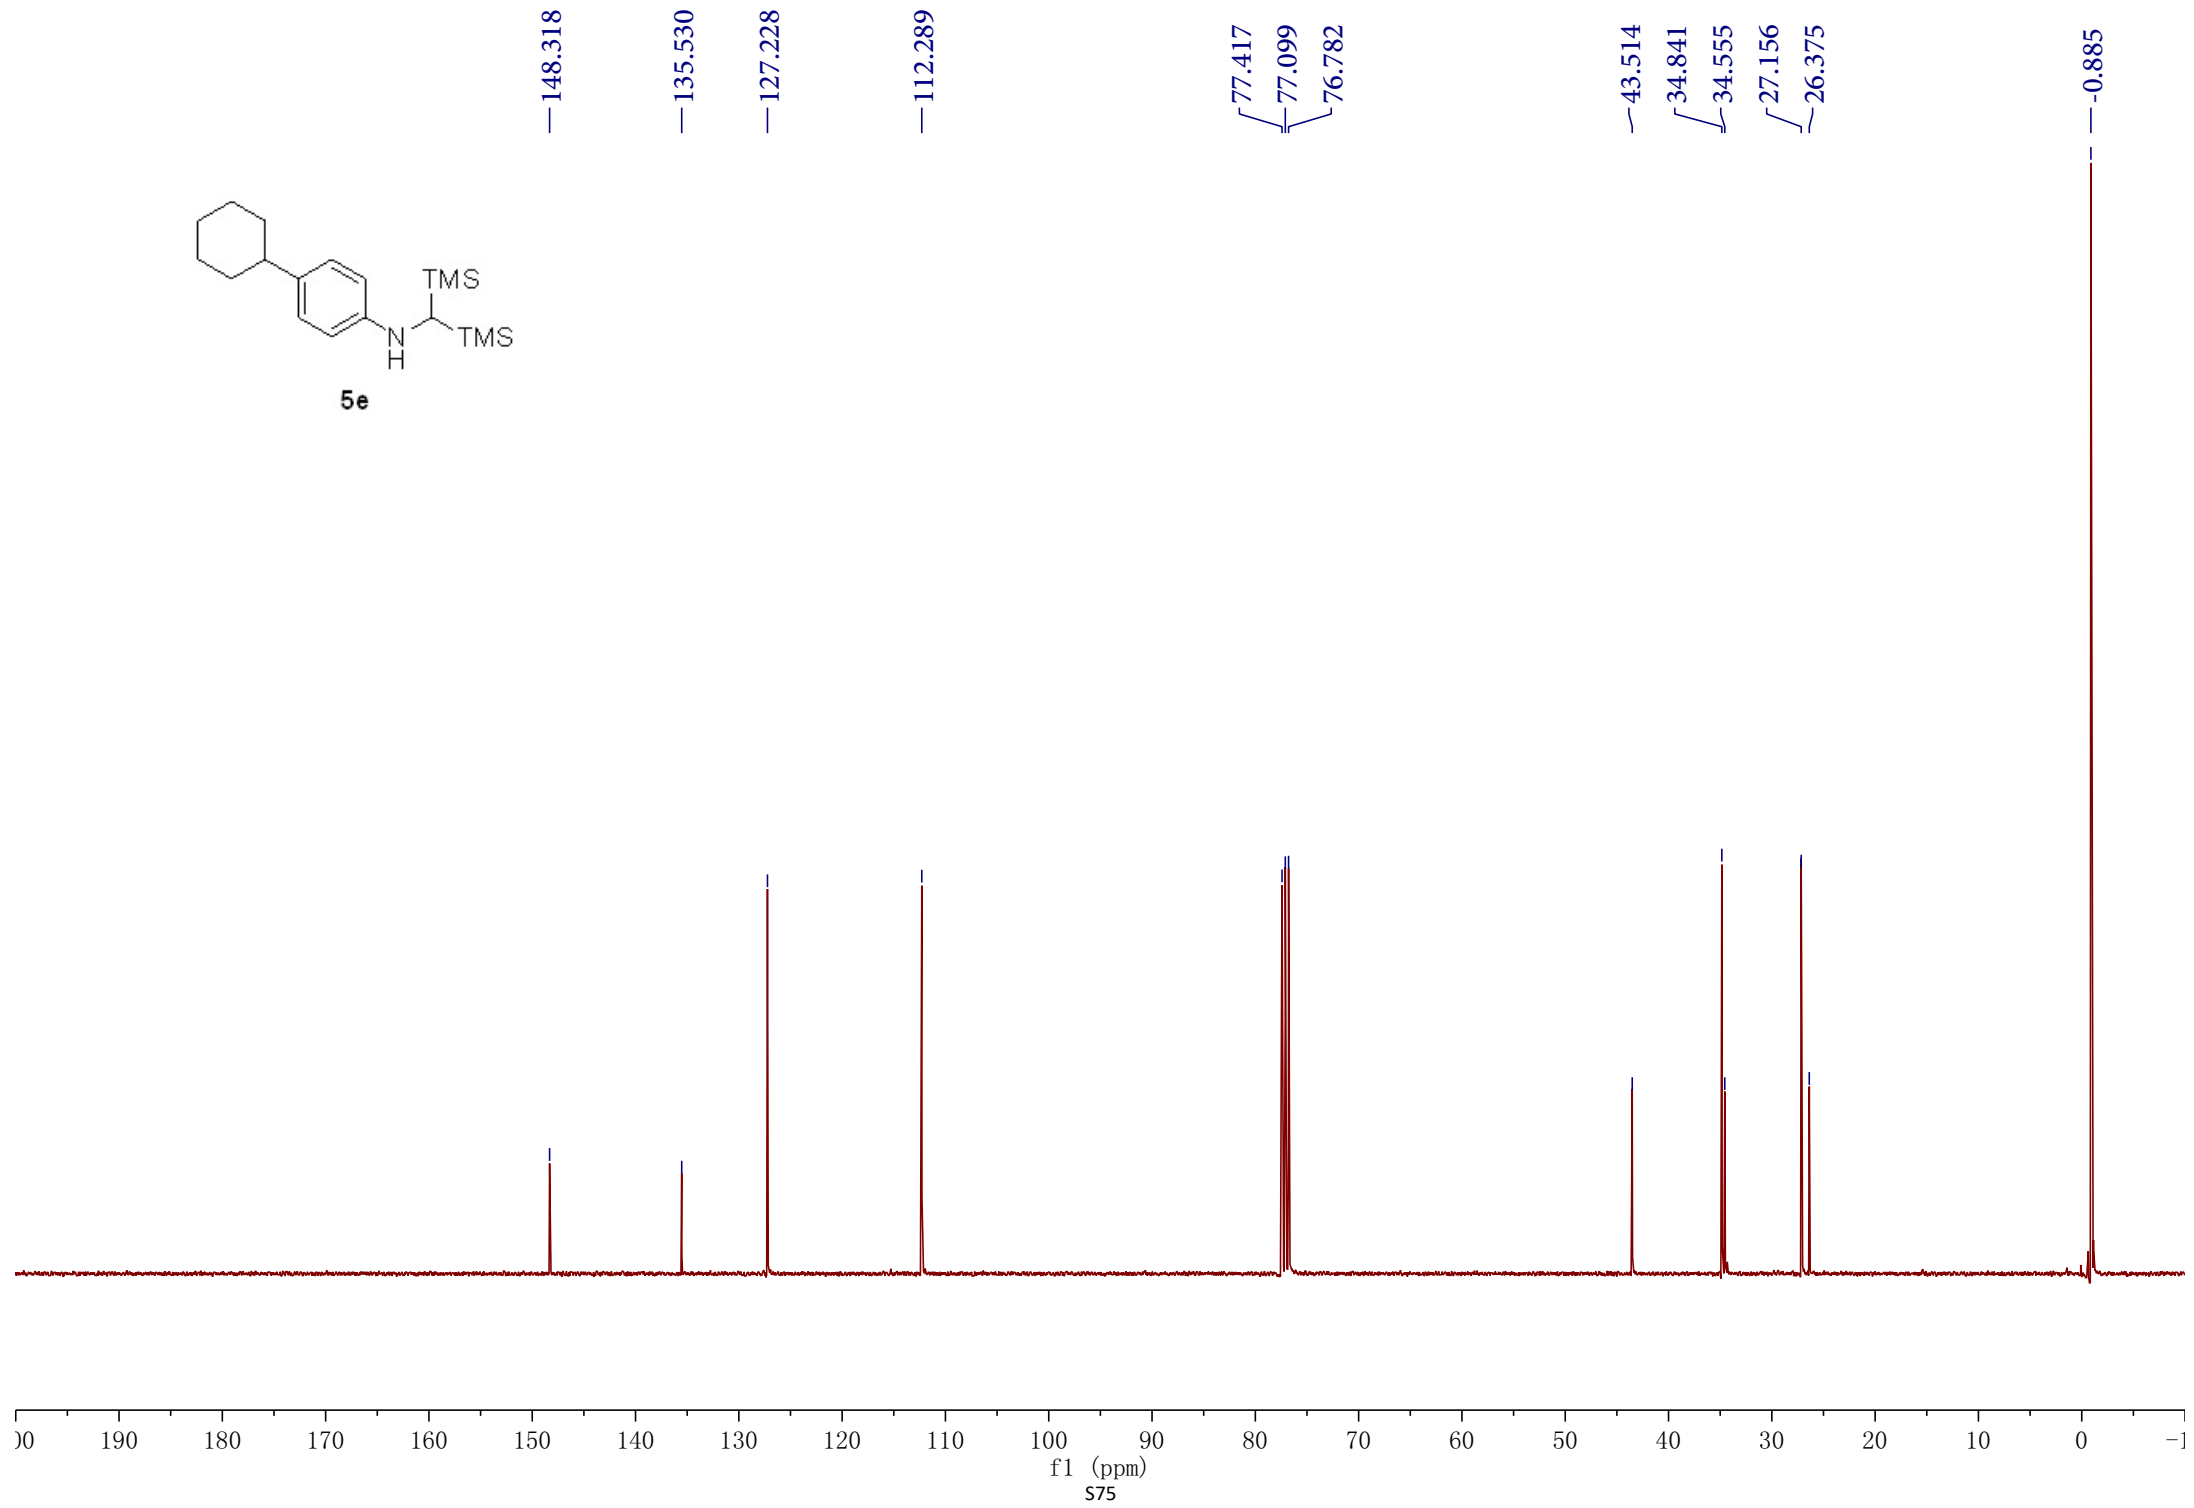

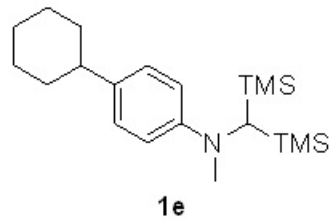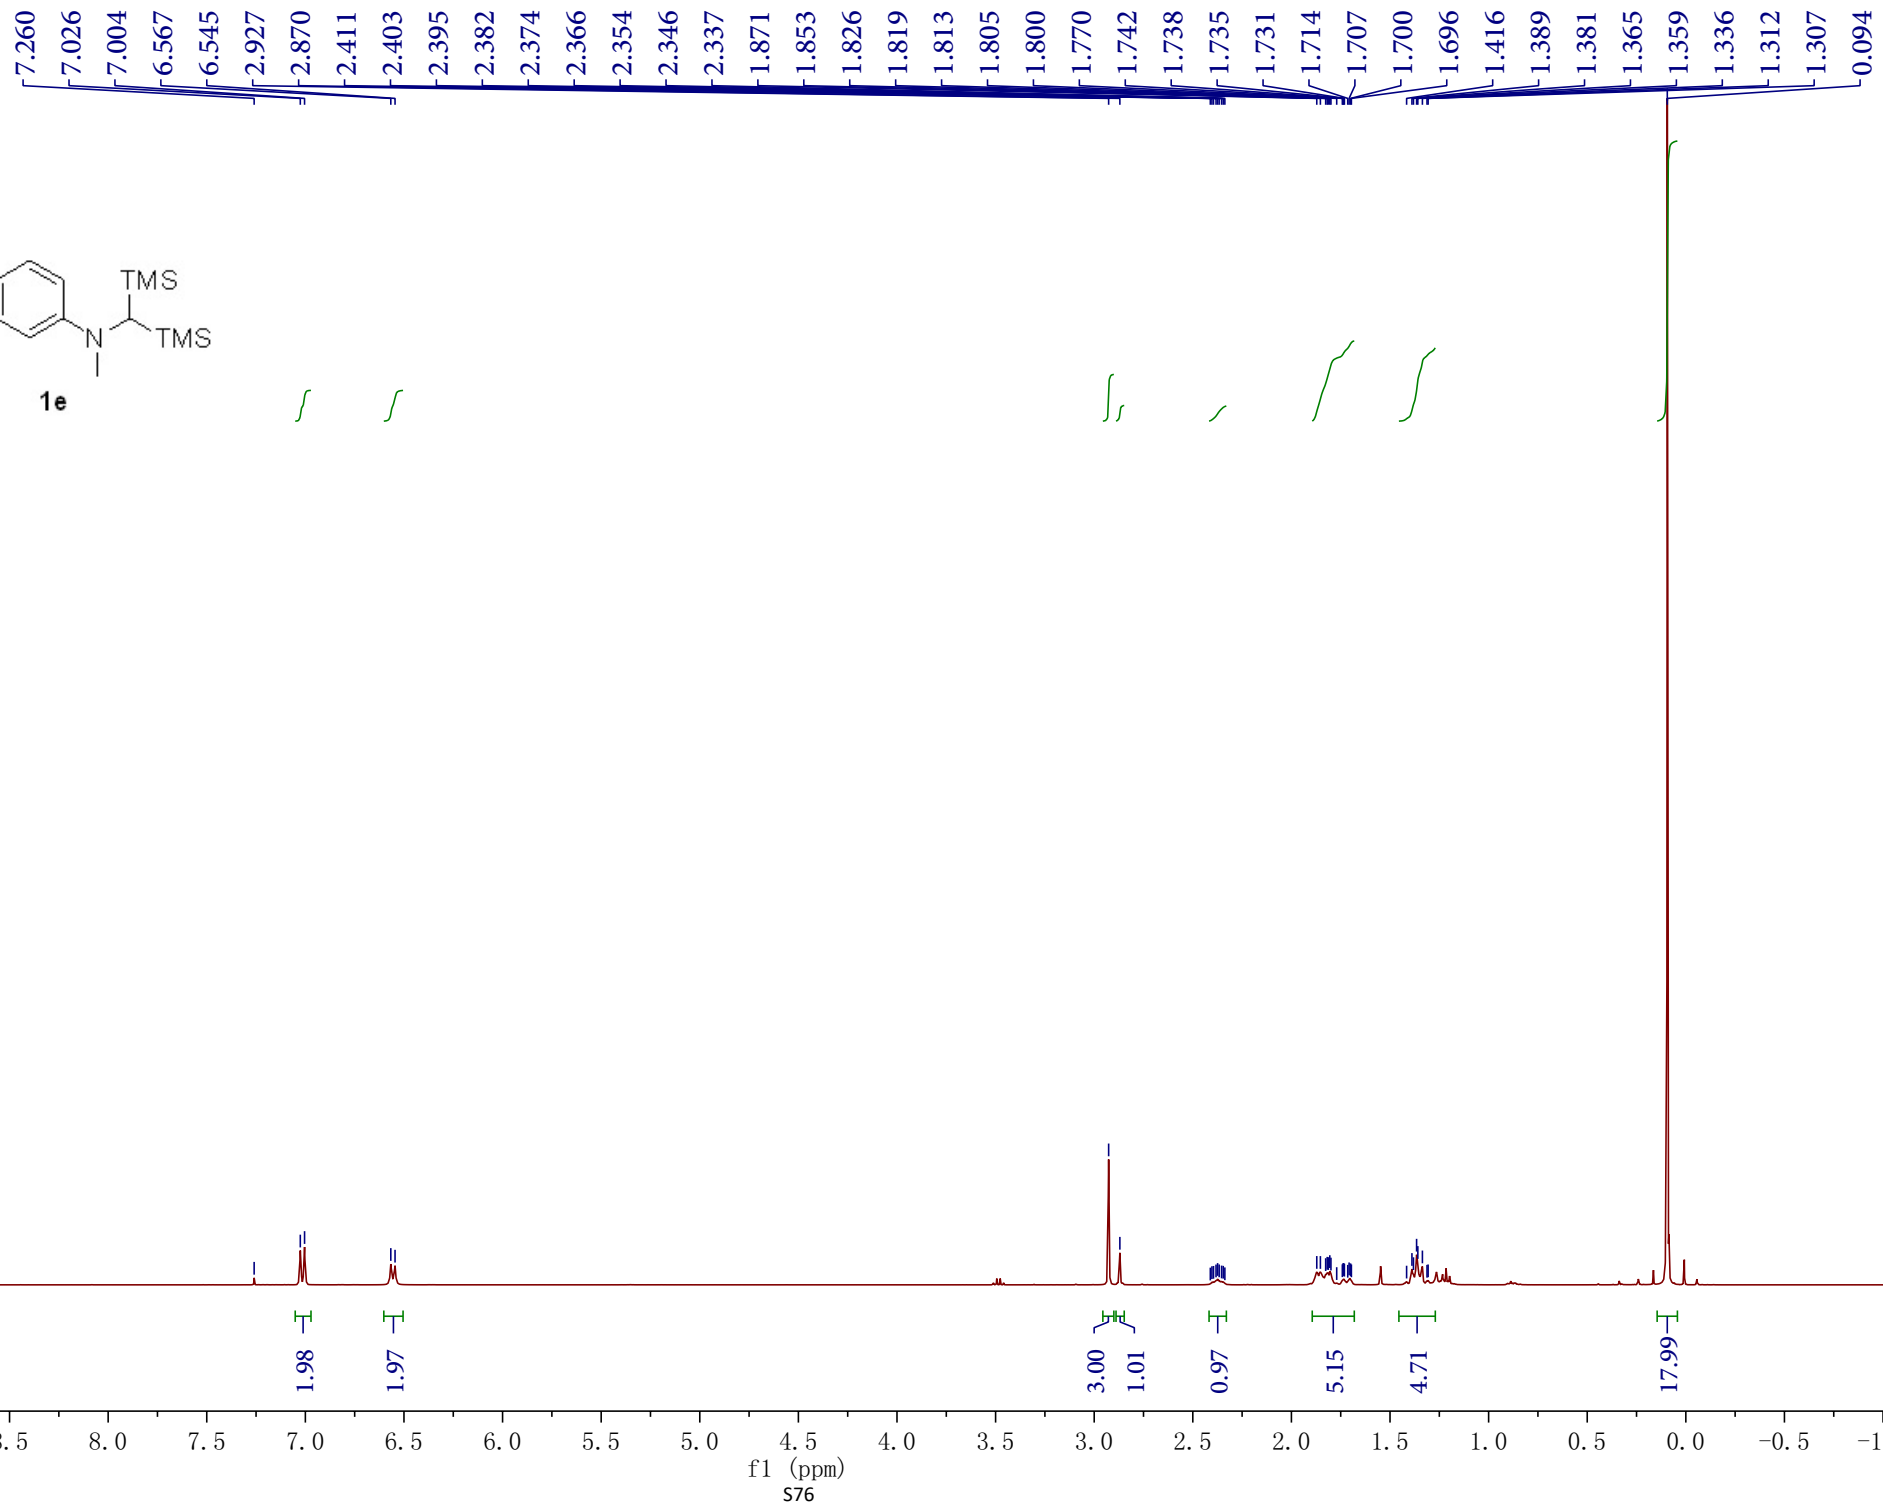

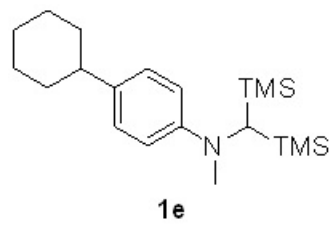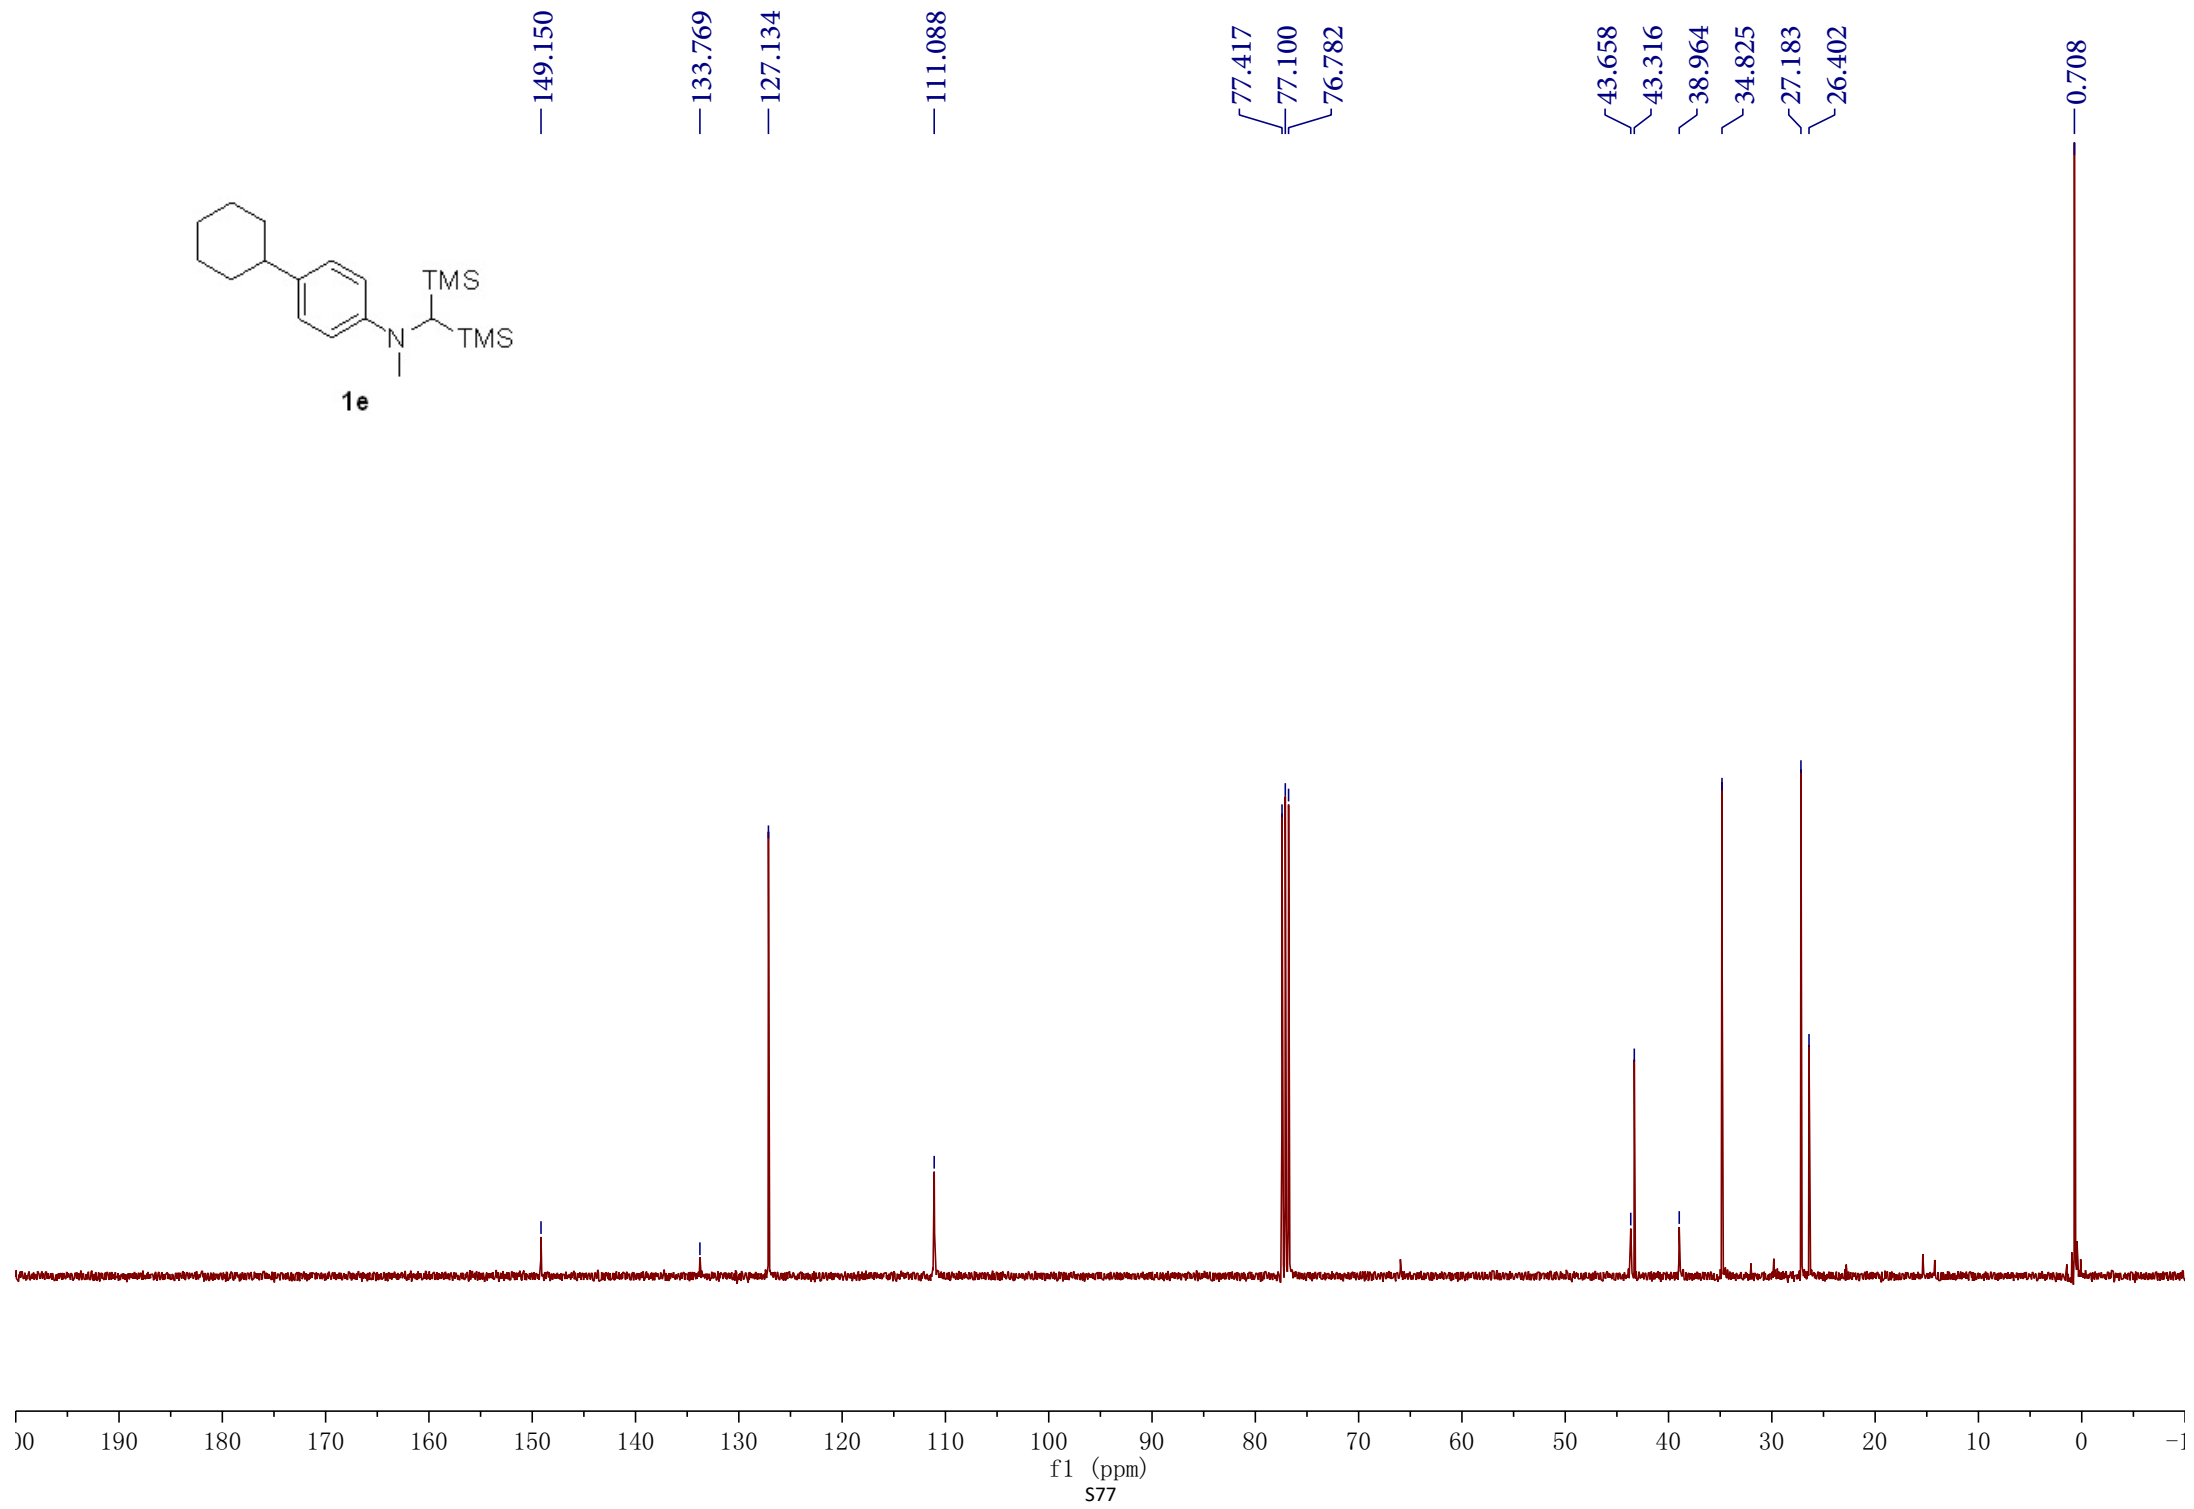

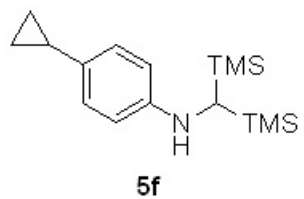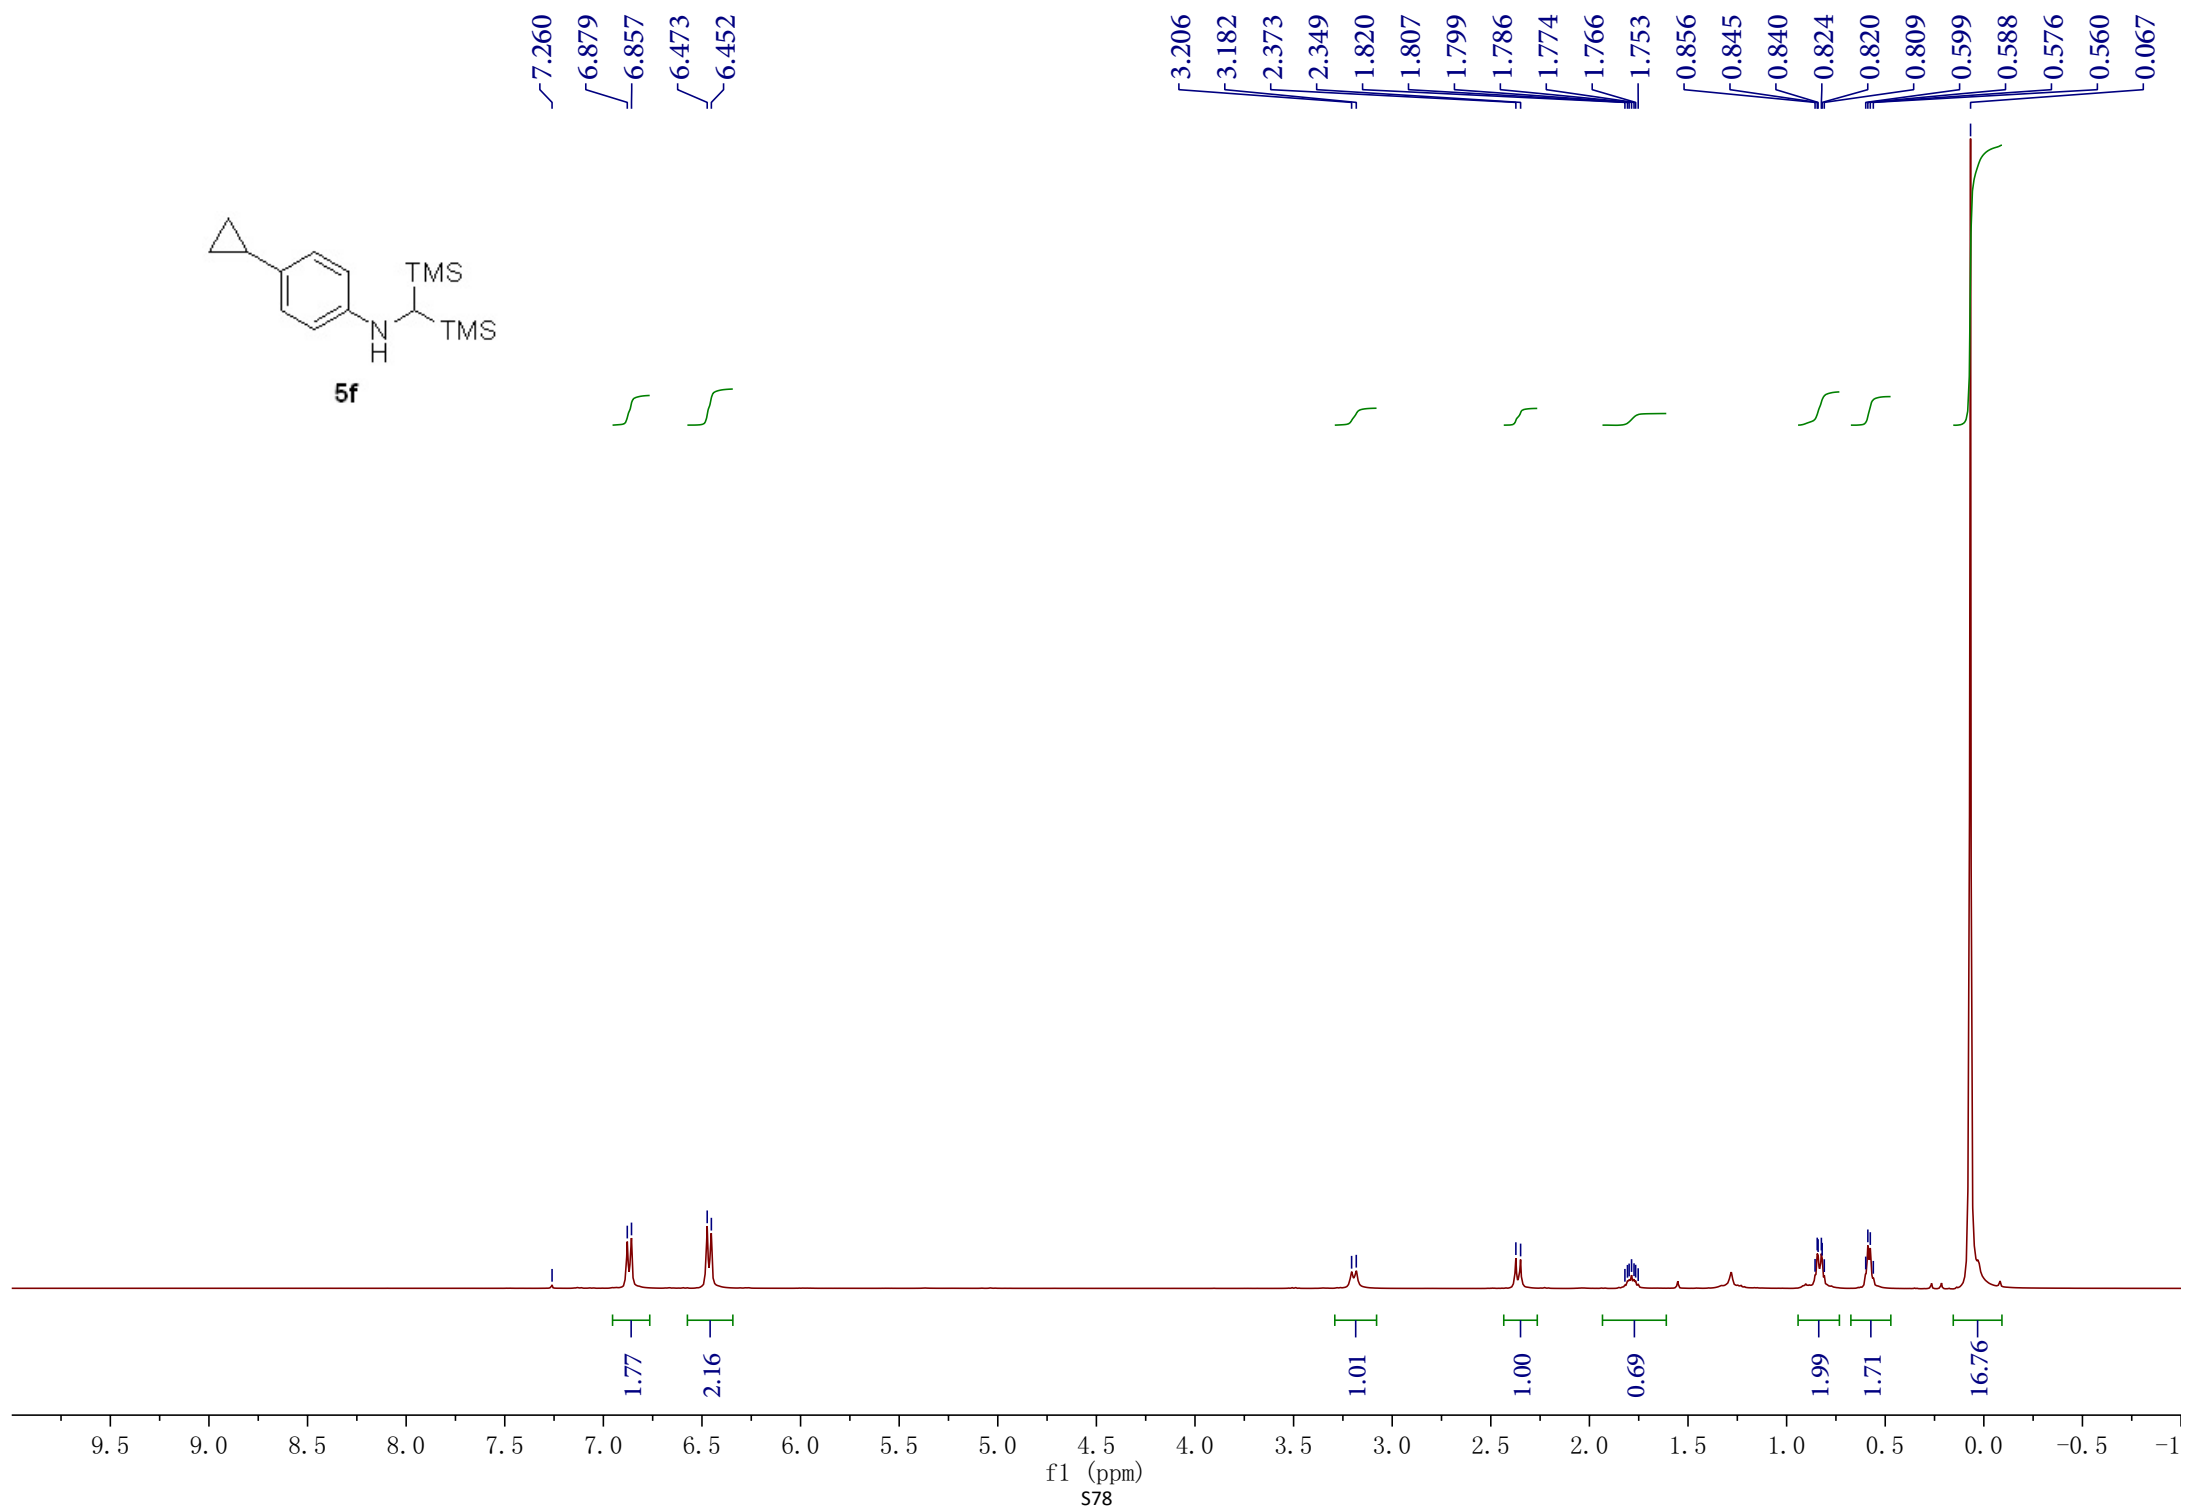



—148.247  
—130.610  
—126.673  
—112.328  
77.417  
77.100  
76.782  
—34.507  
—14.610  
—8.114  
—0.930

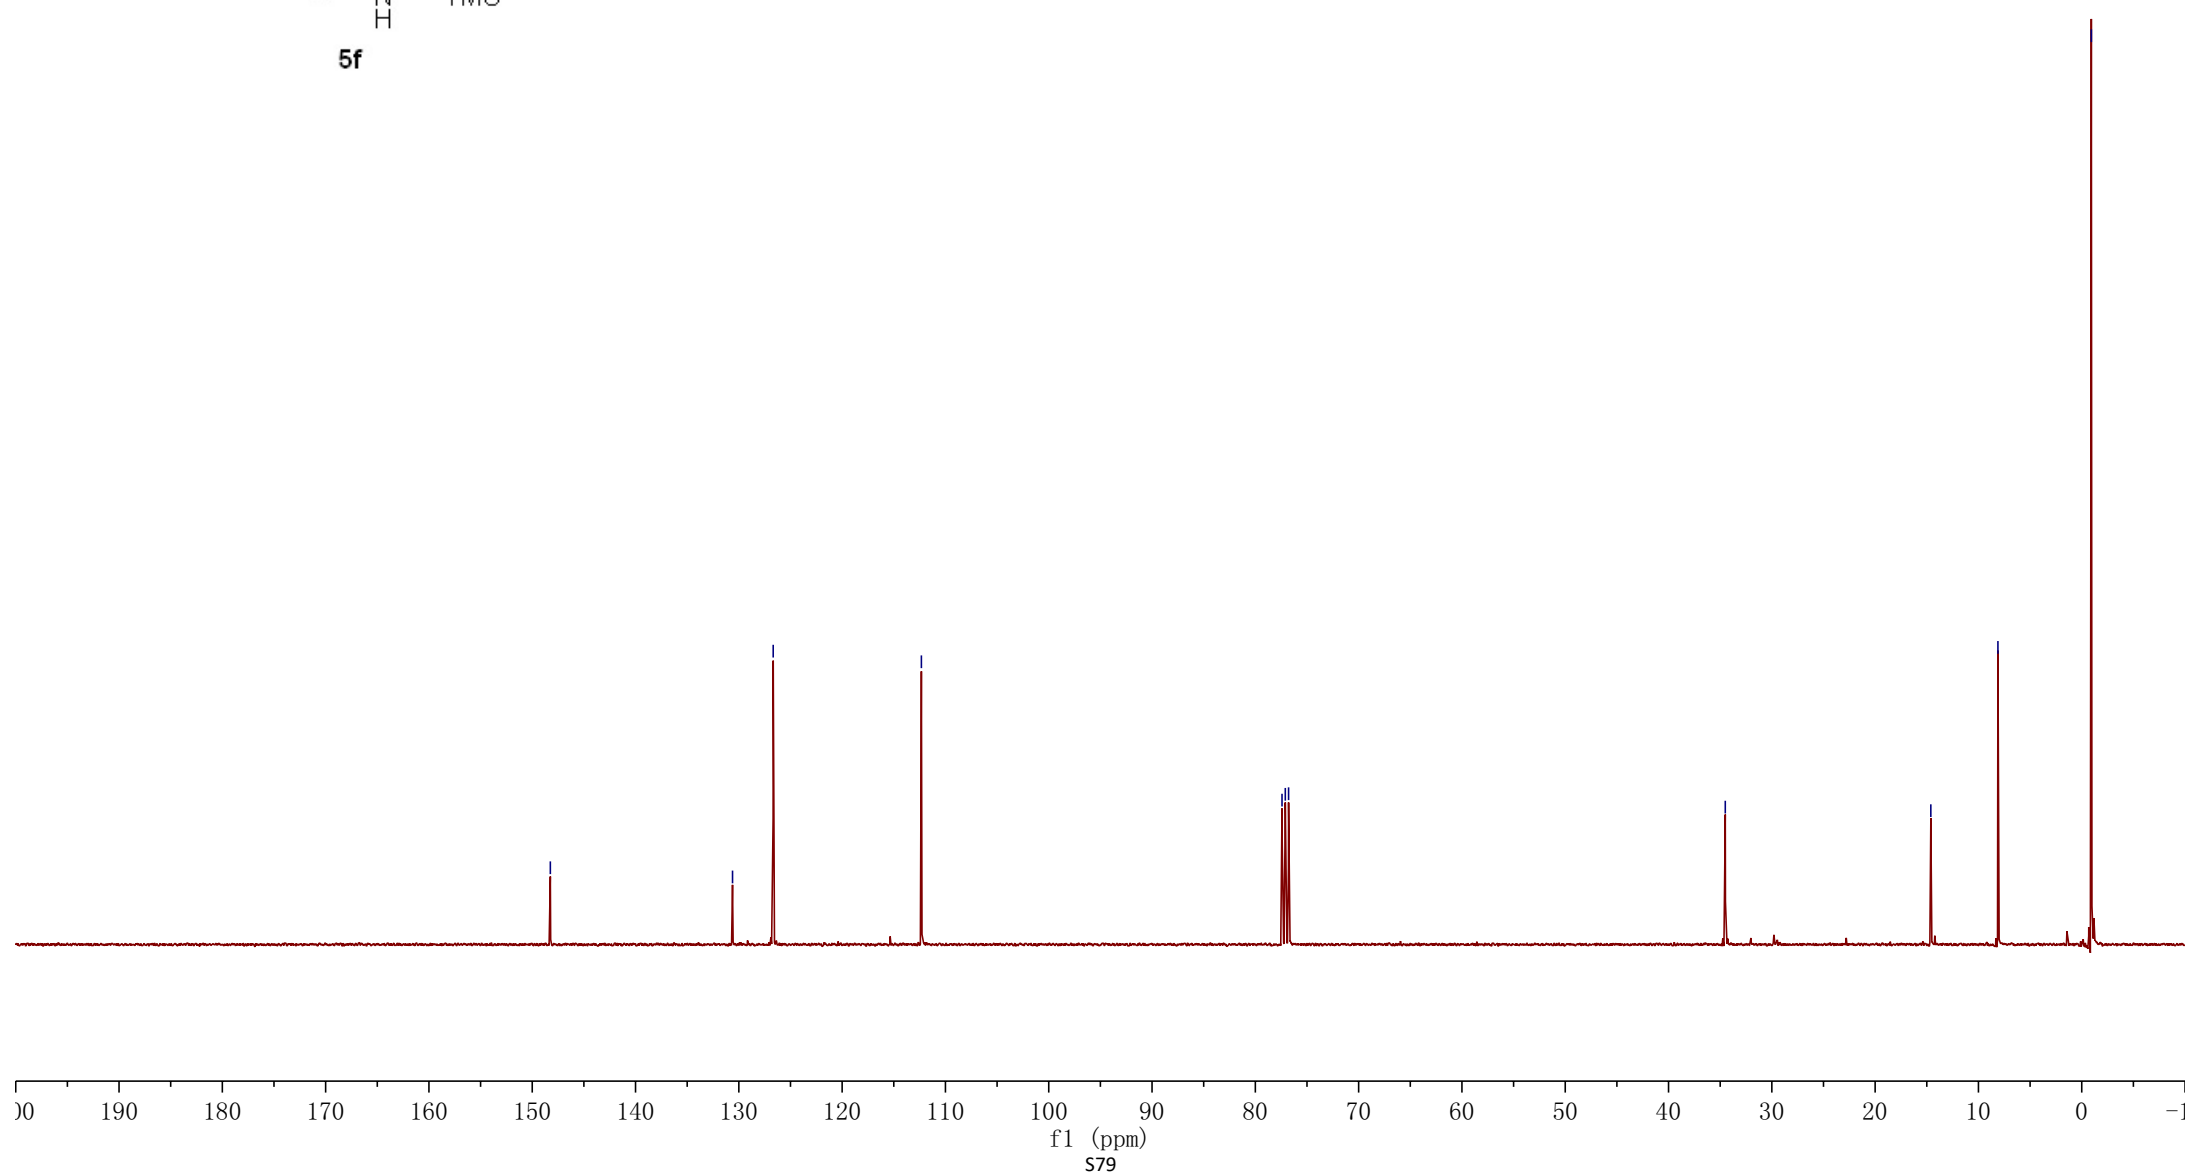

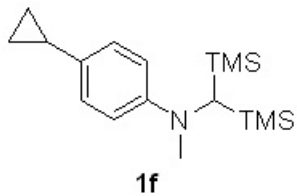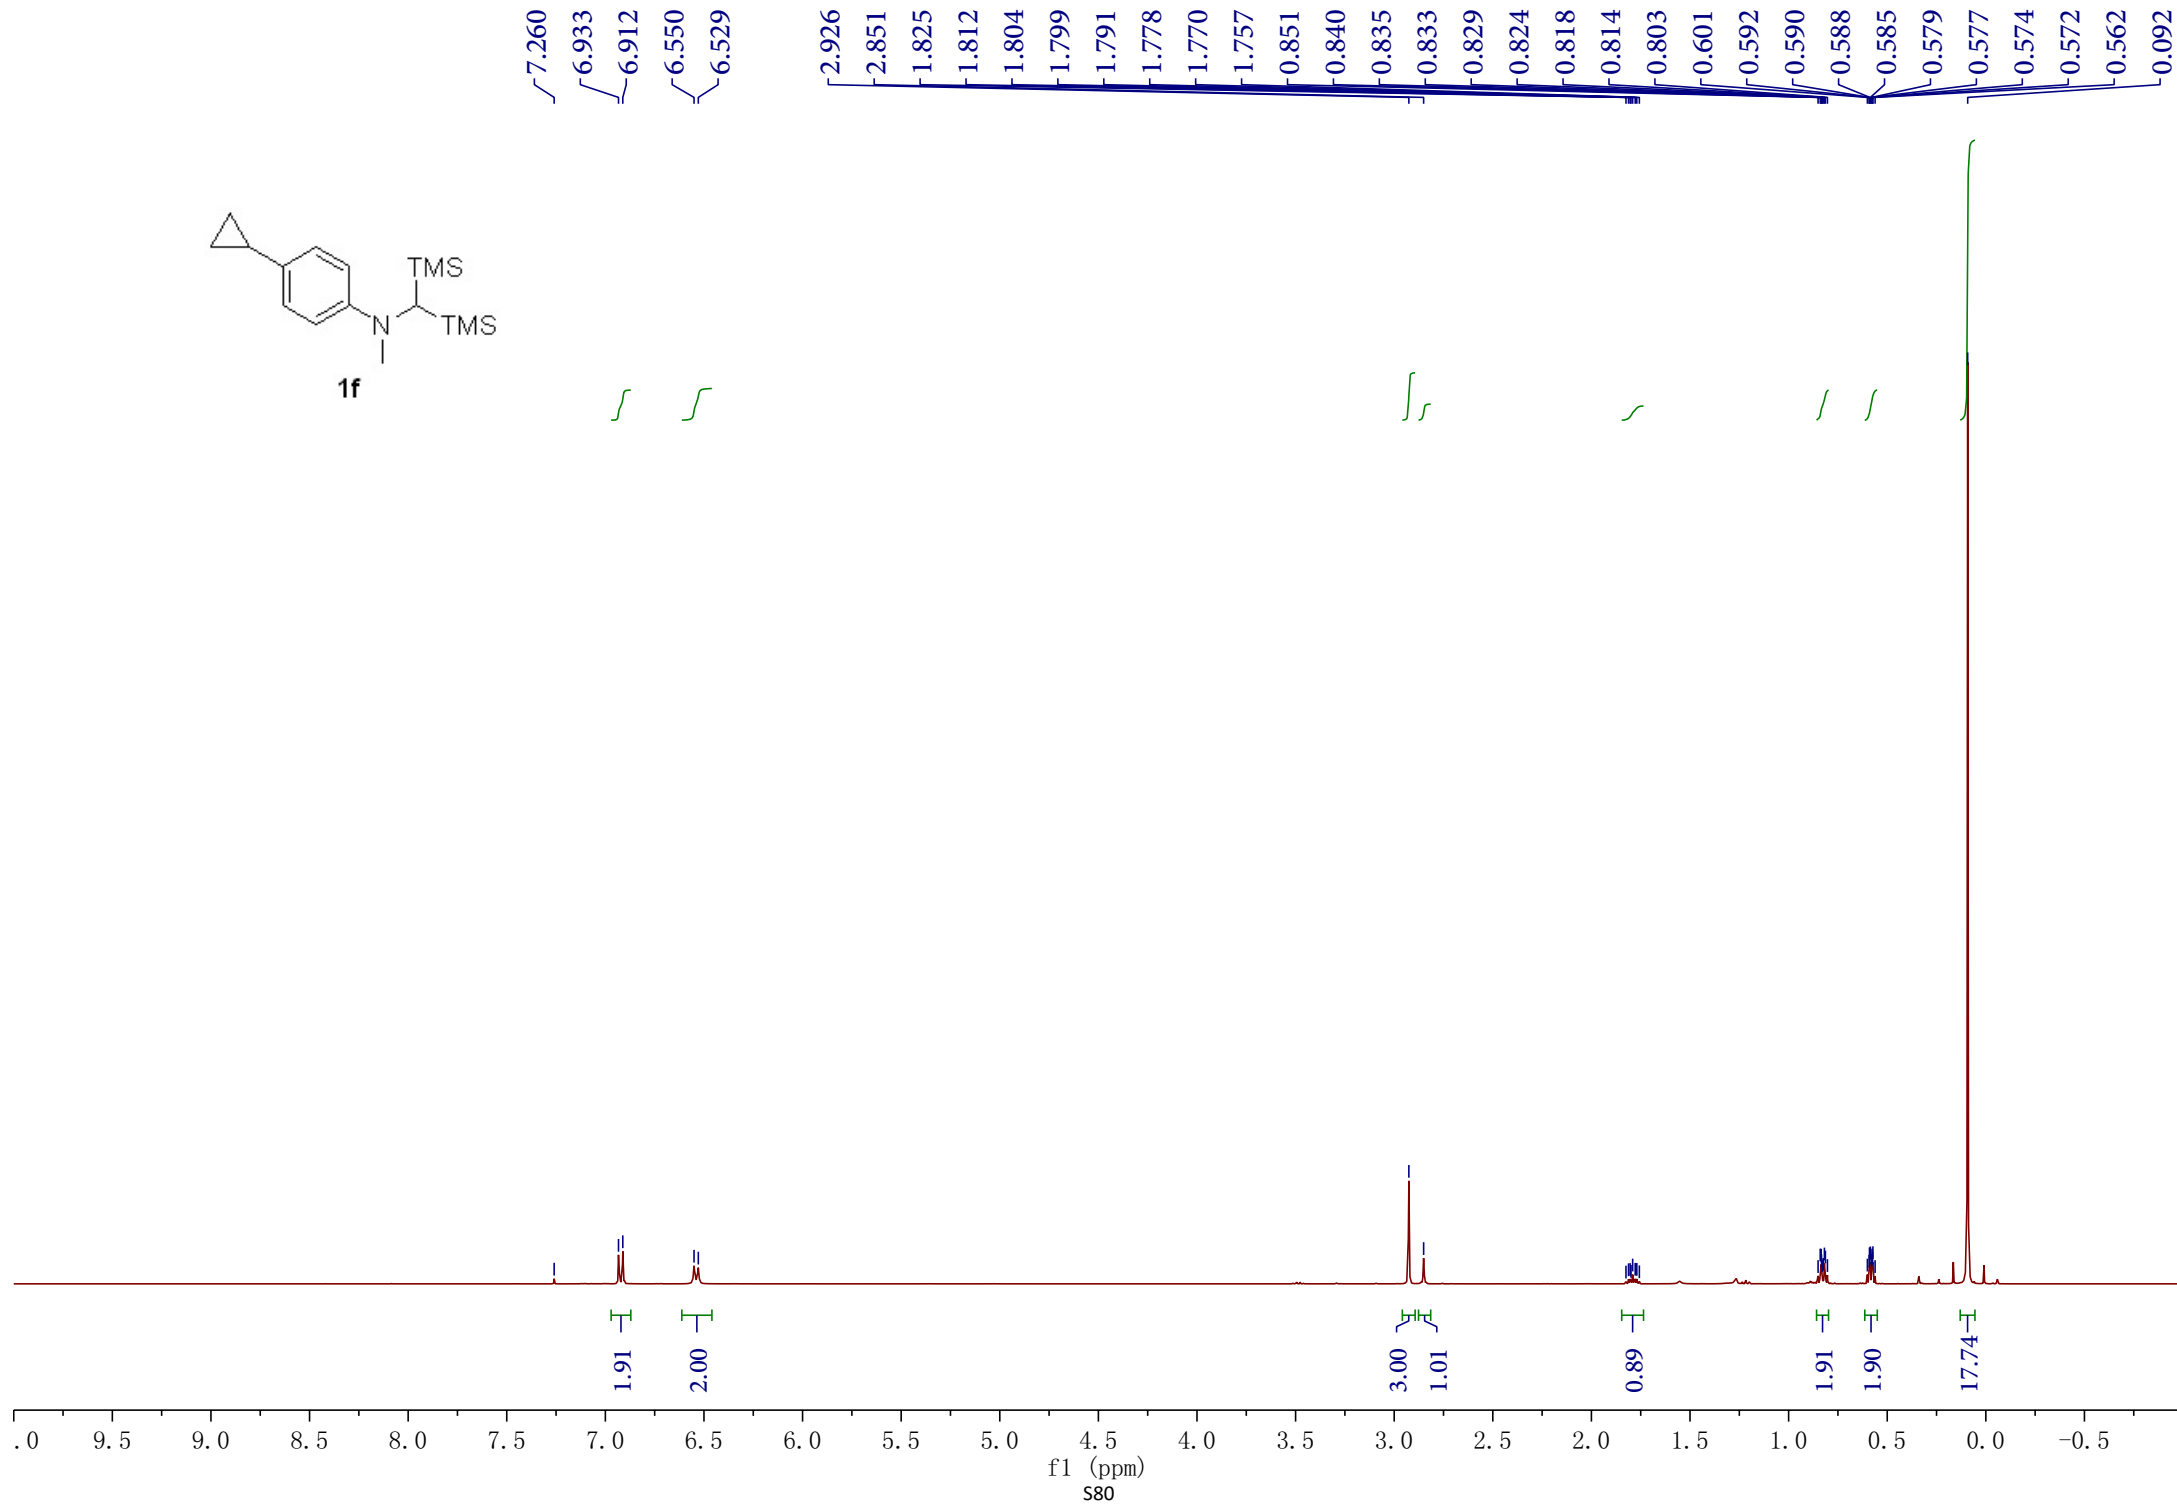



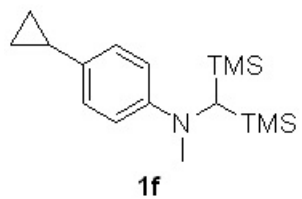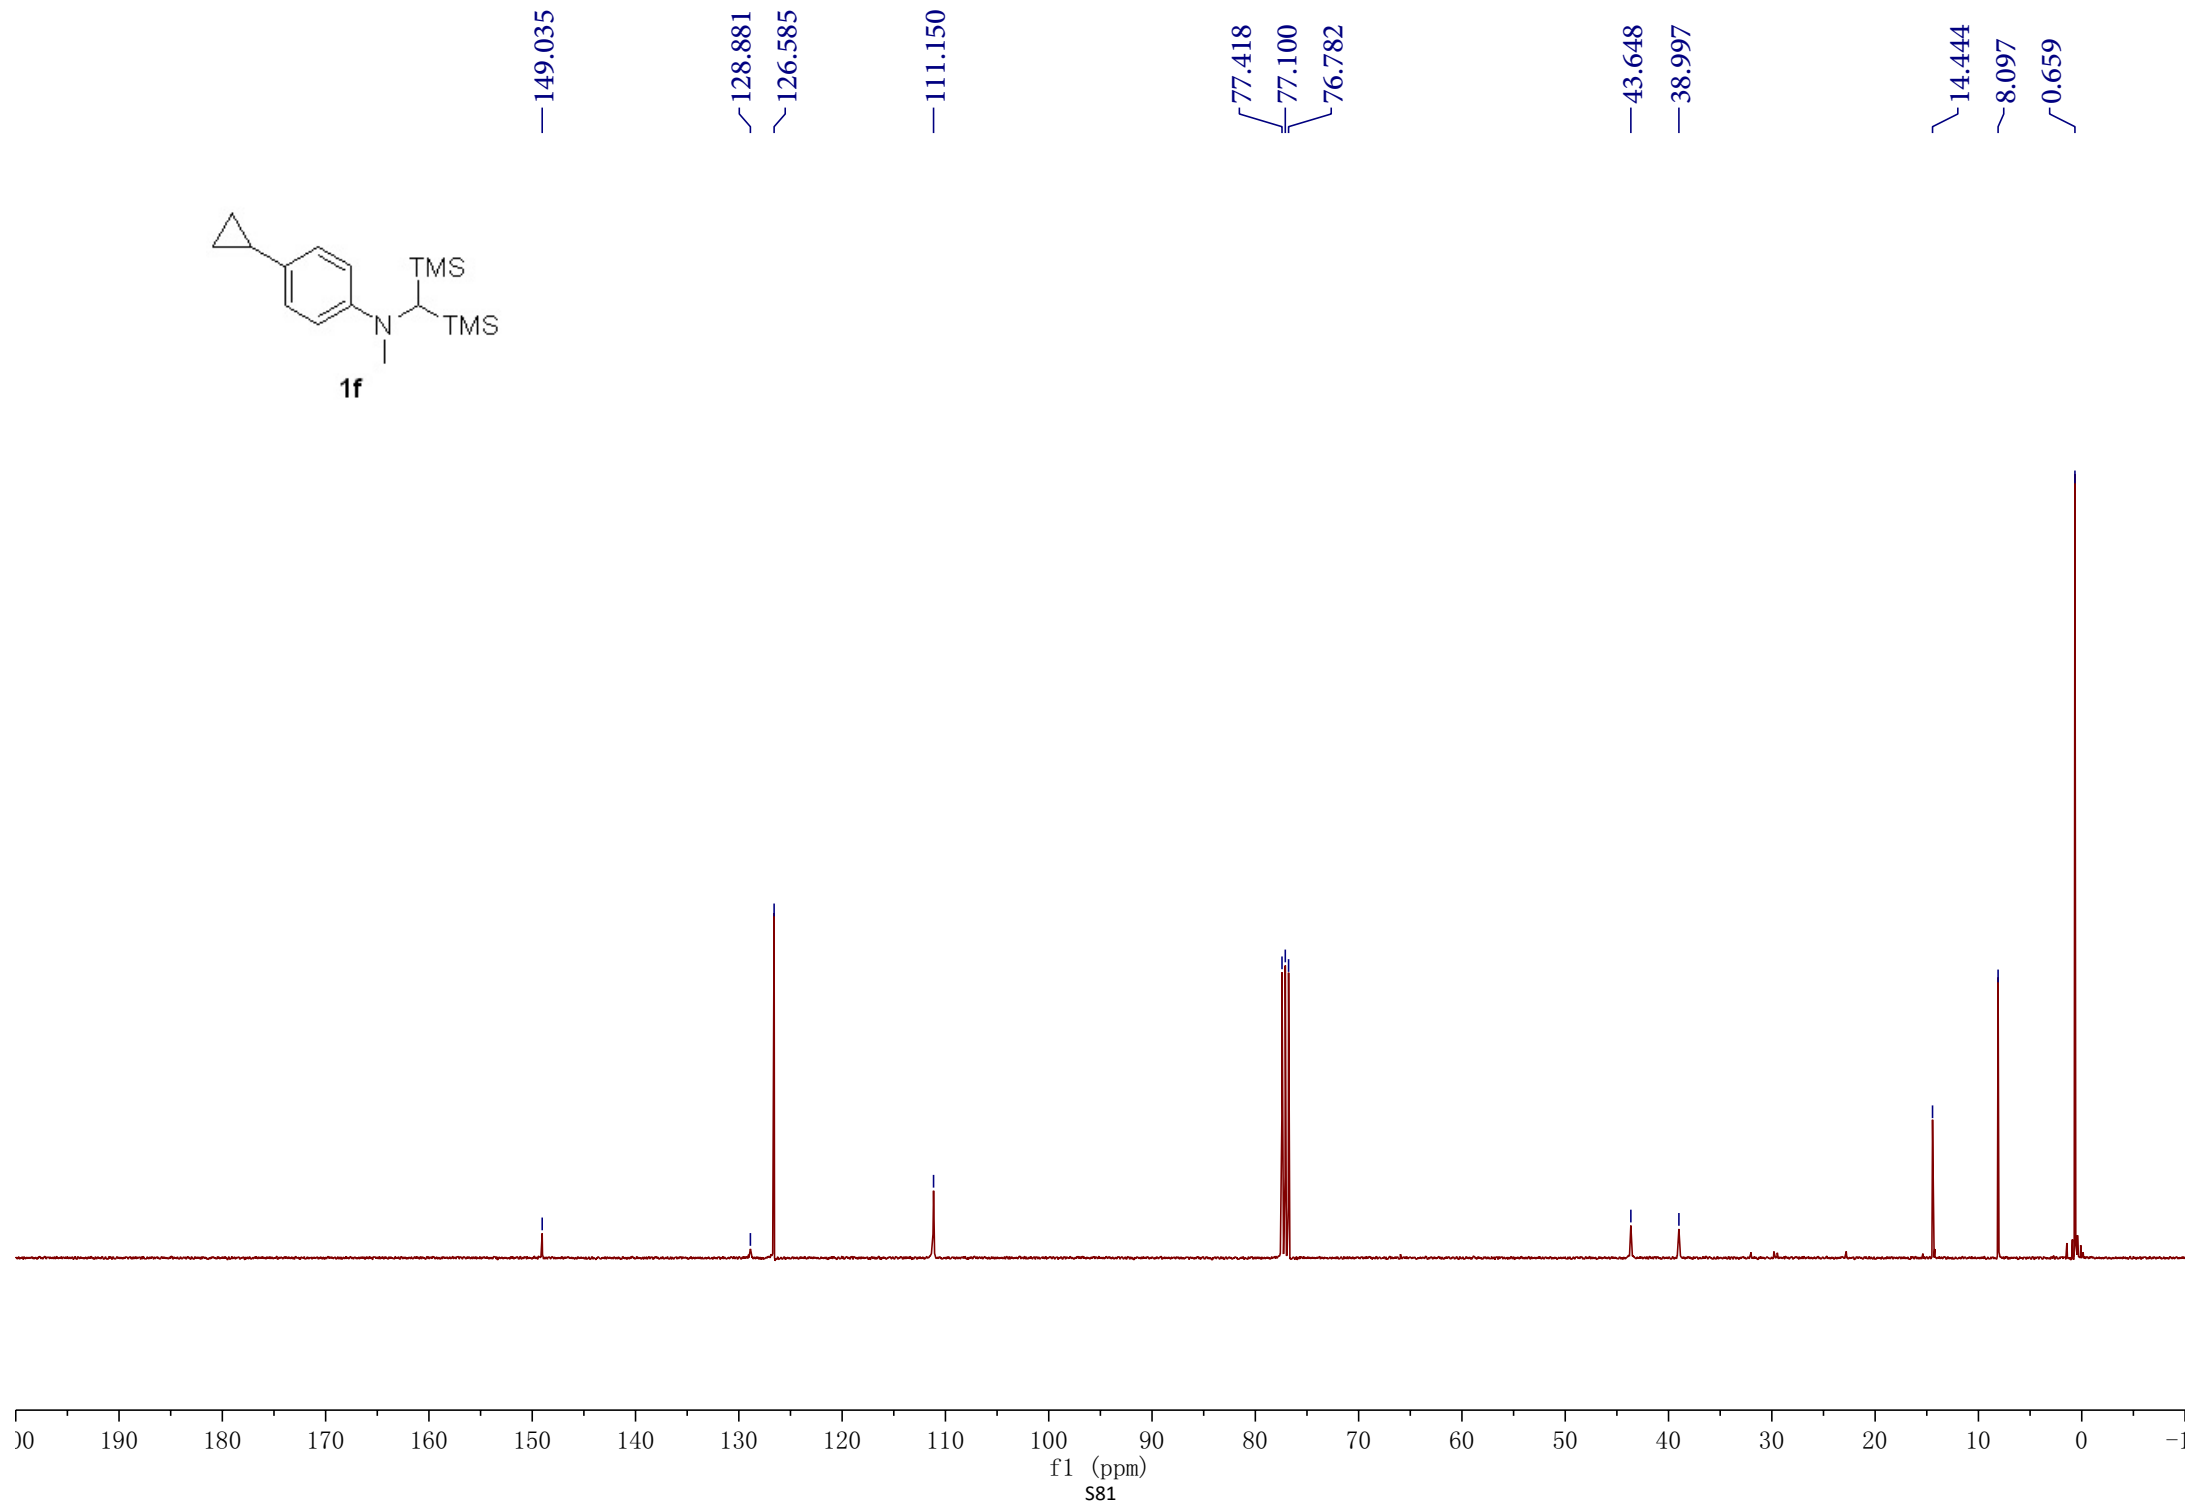

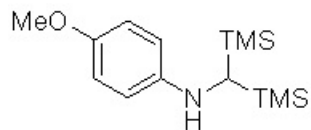

5g

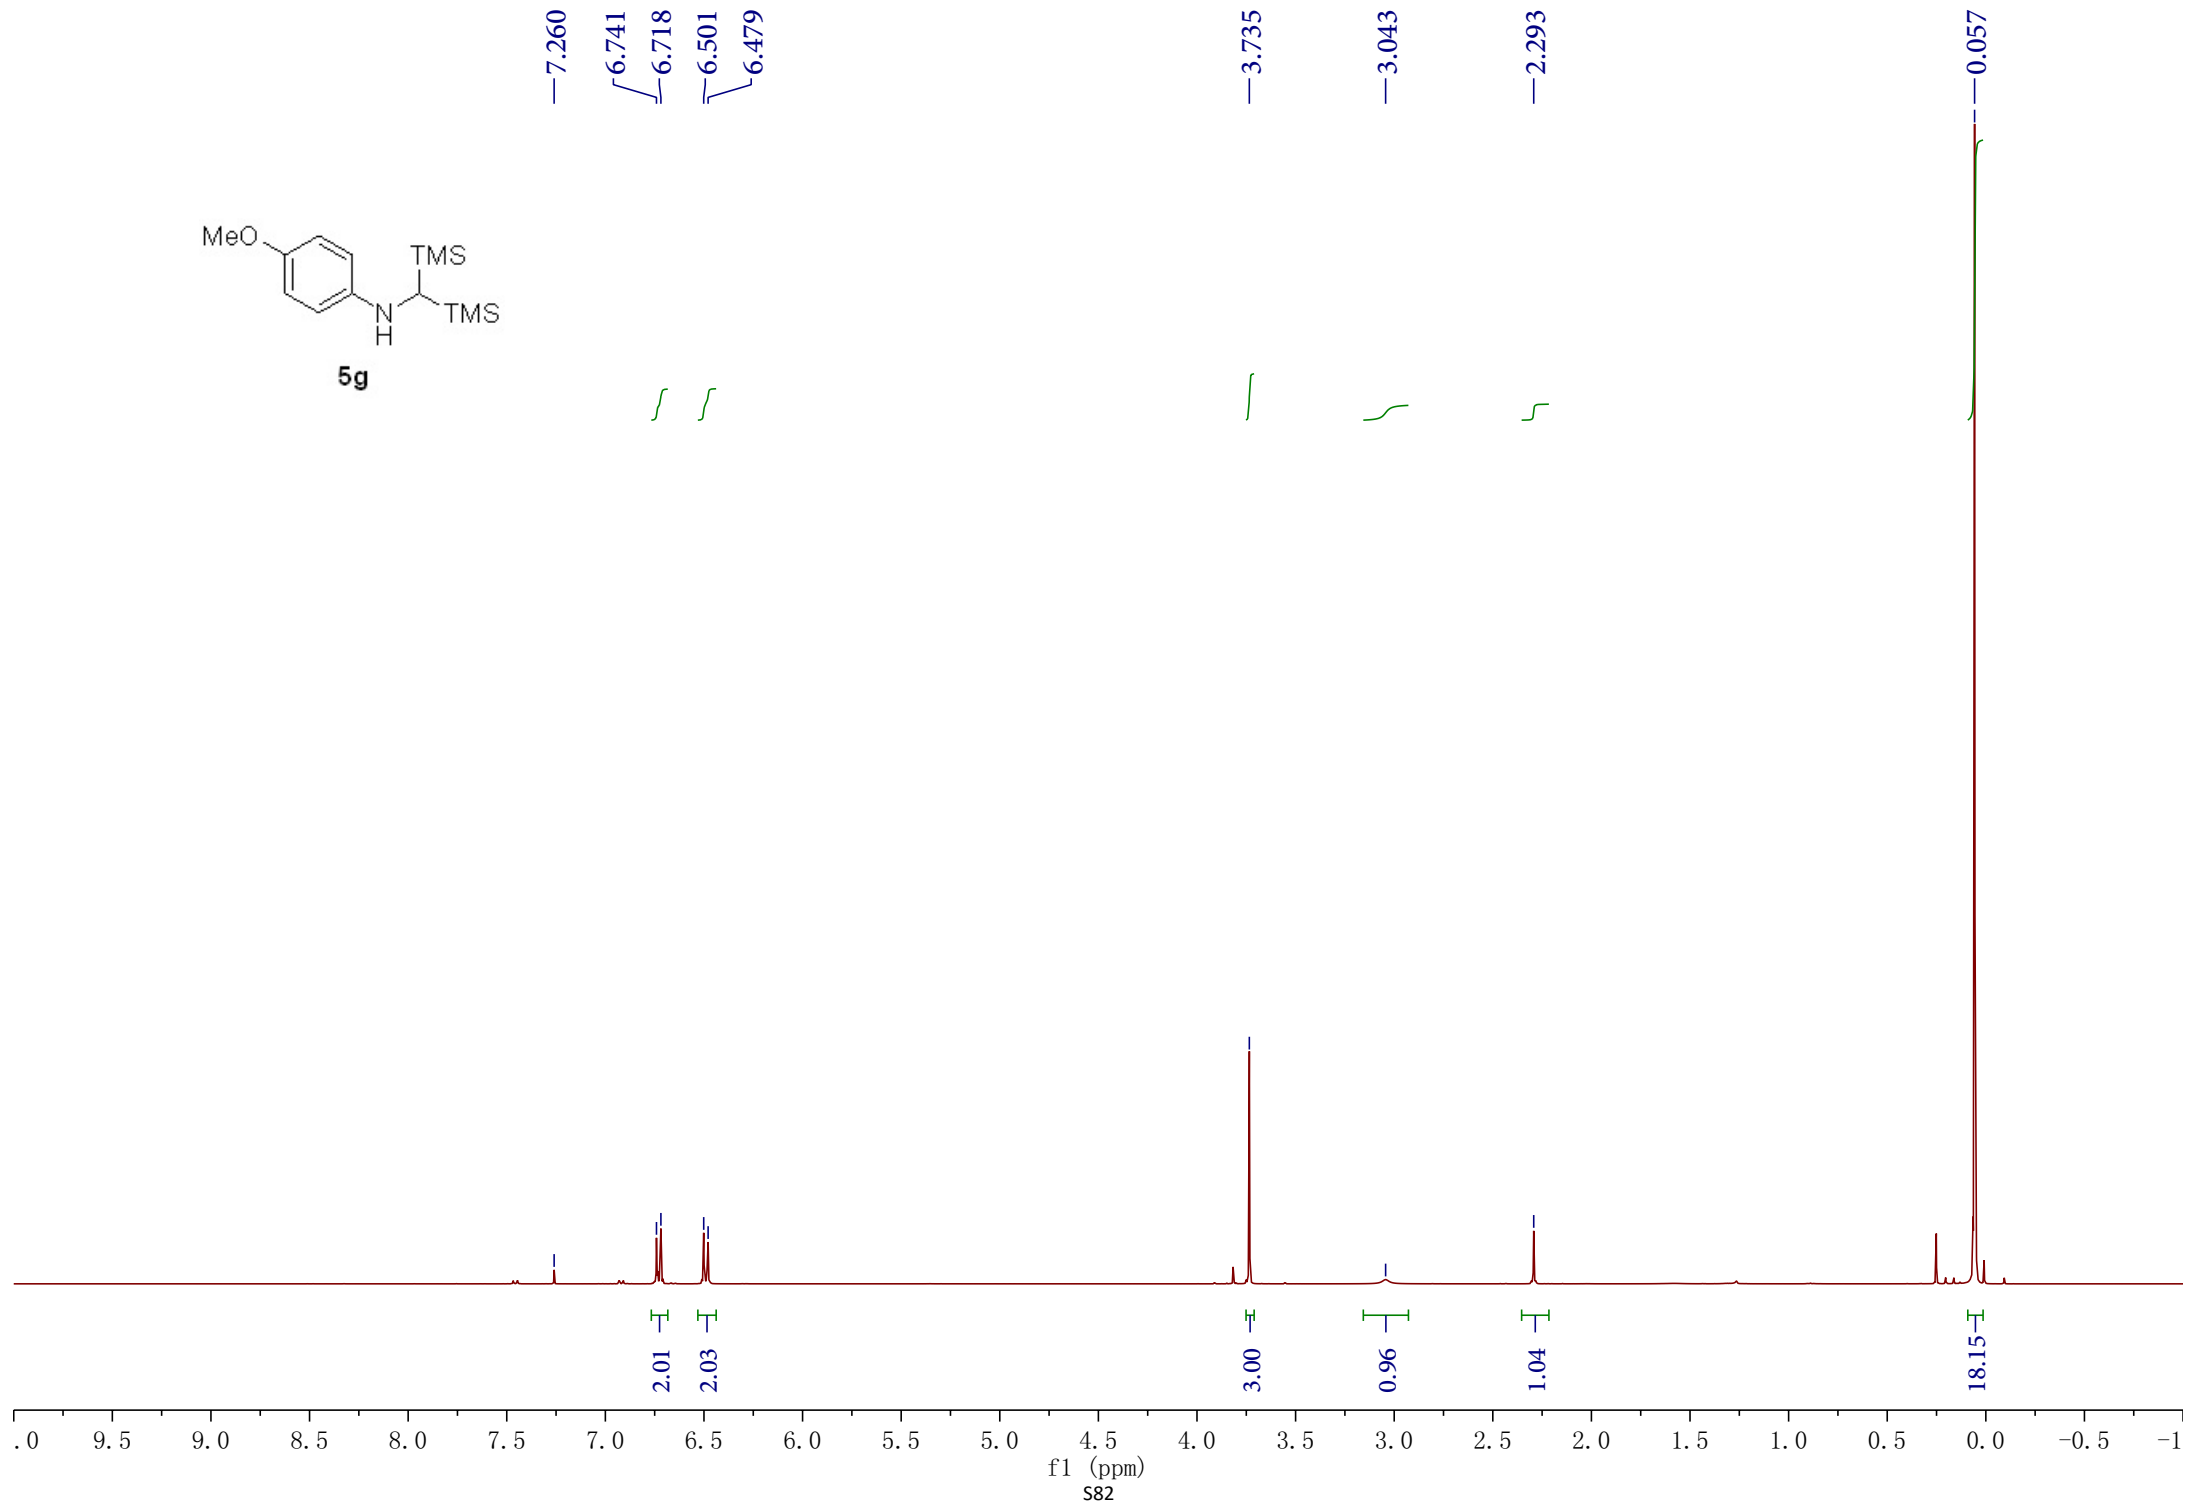

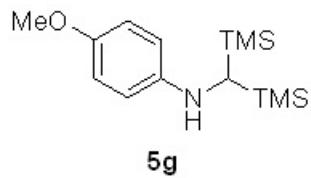

— 150.870

— 144.895

— 114.837

— 113.282

— 77.418

— 77.100

— 76.783

— 55.920

— 35.245

— -0.922

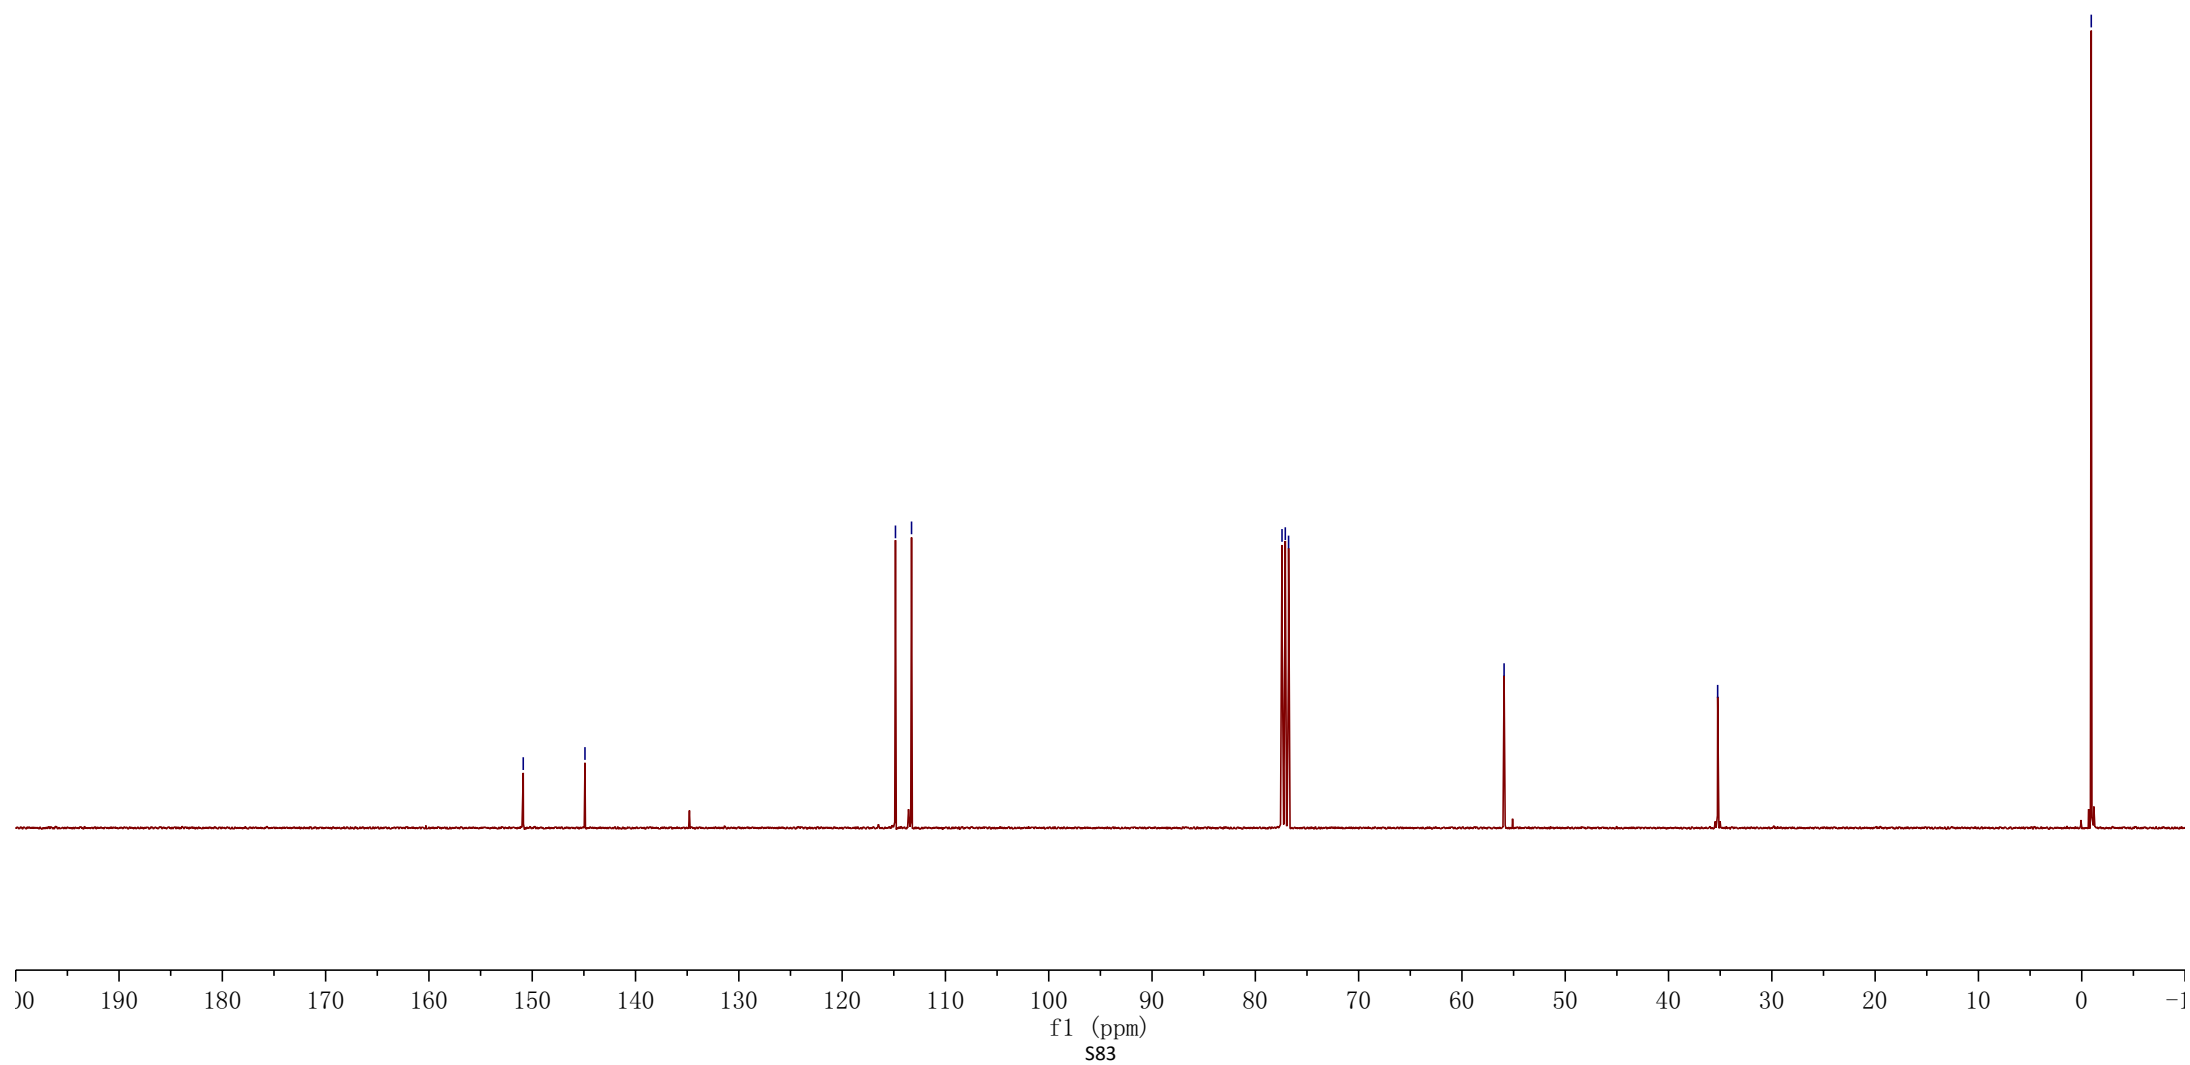

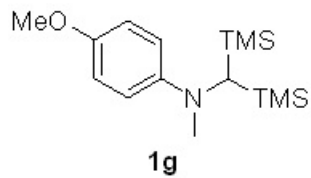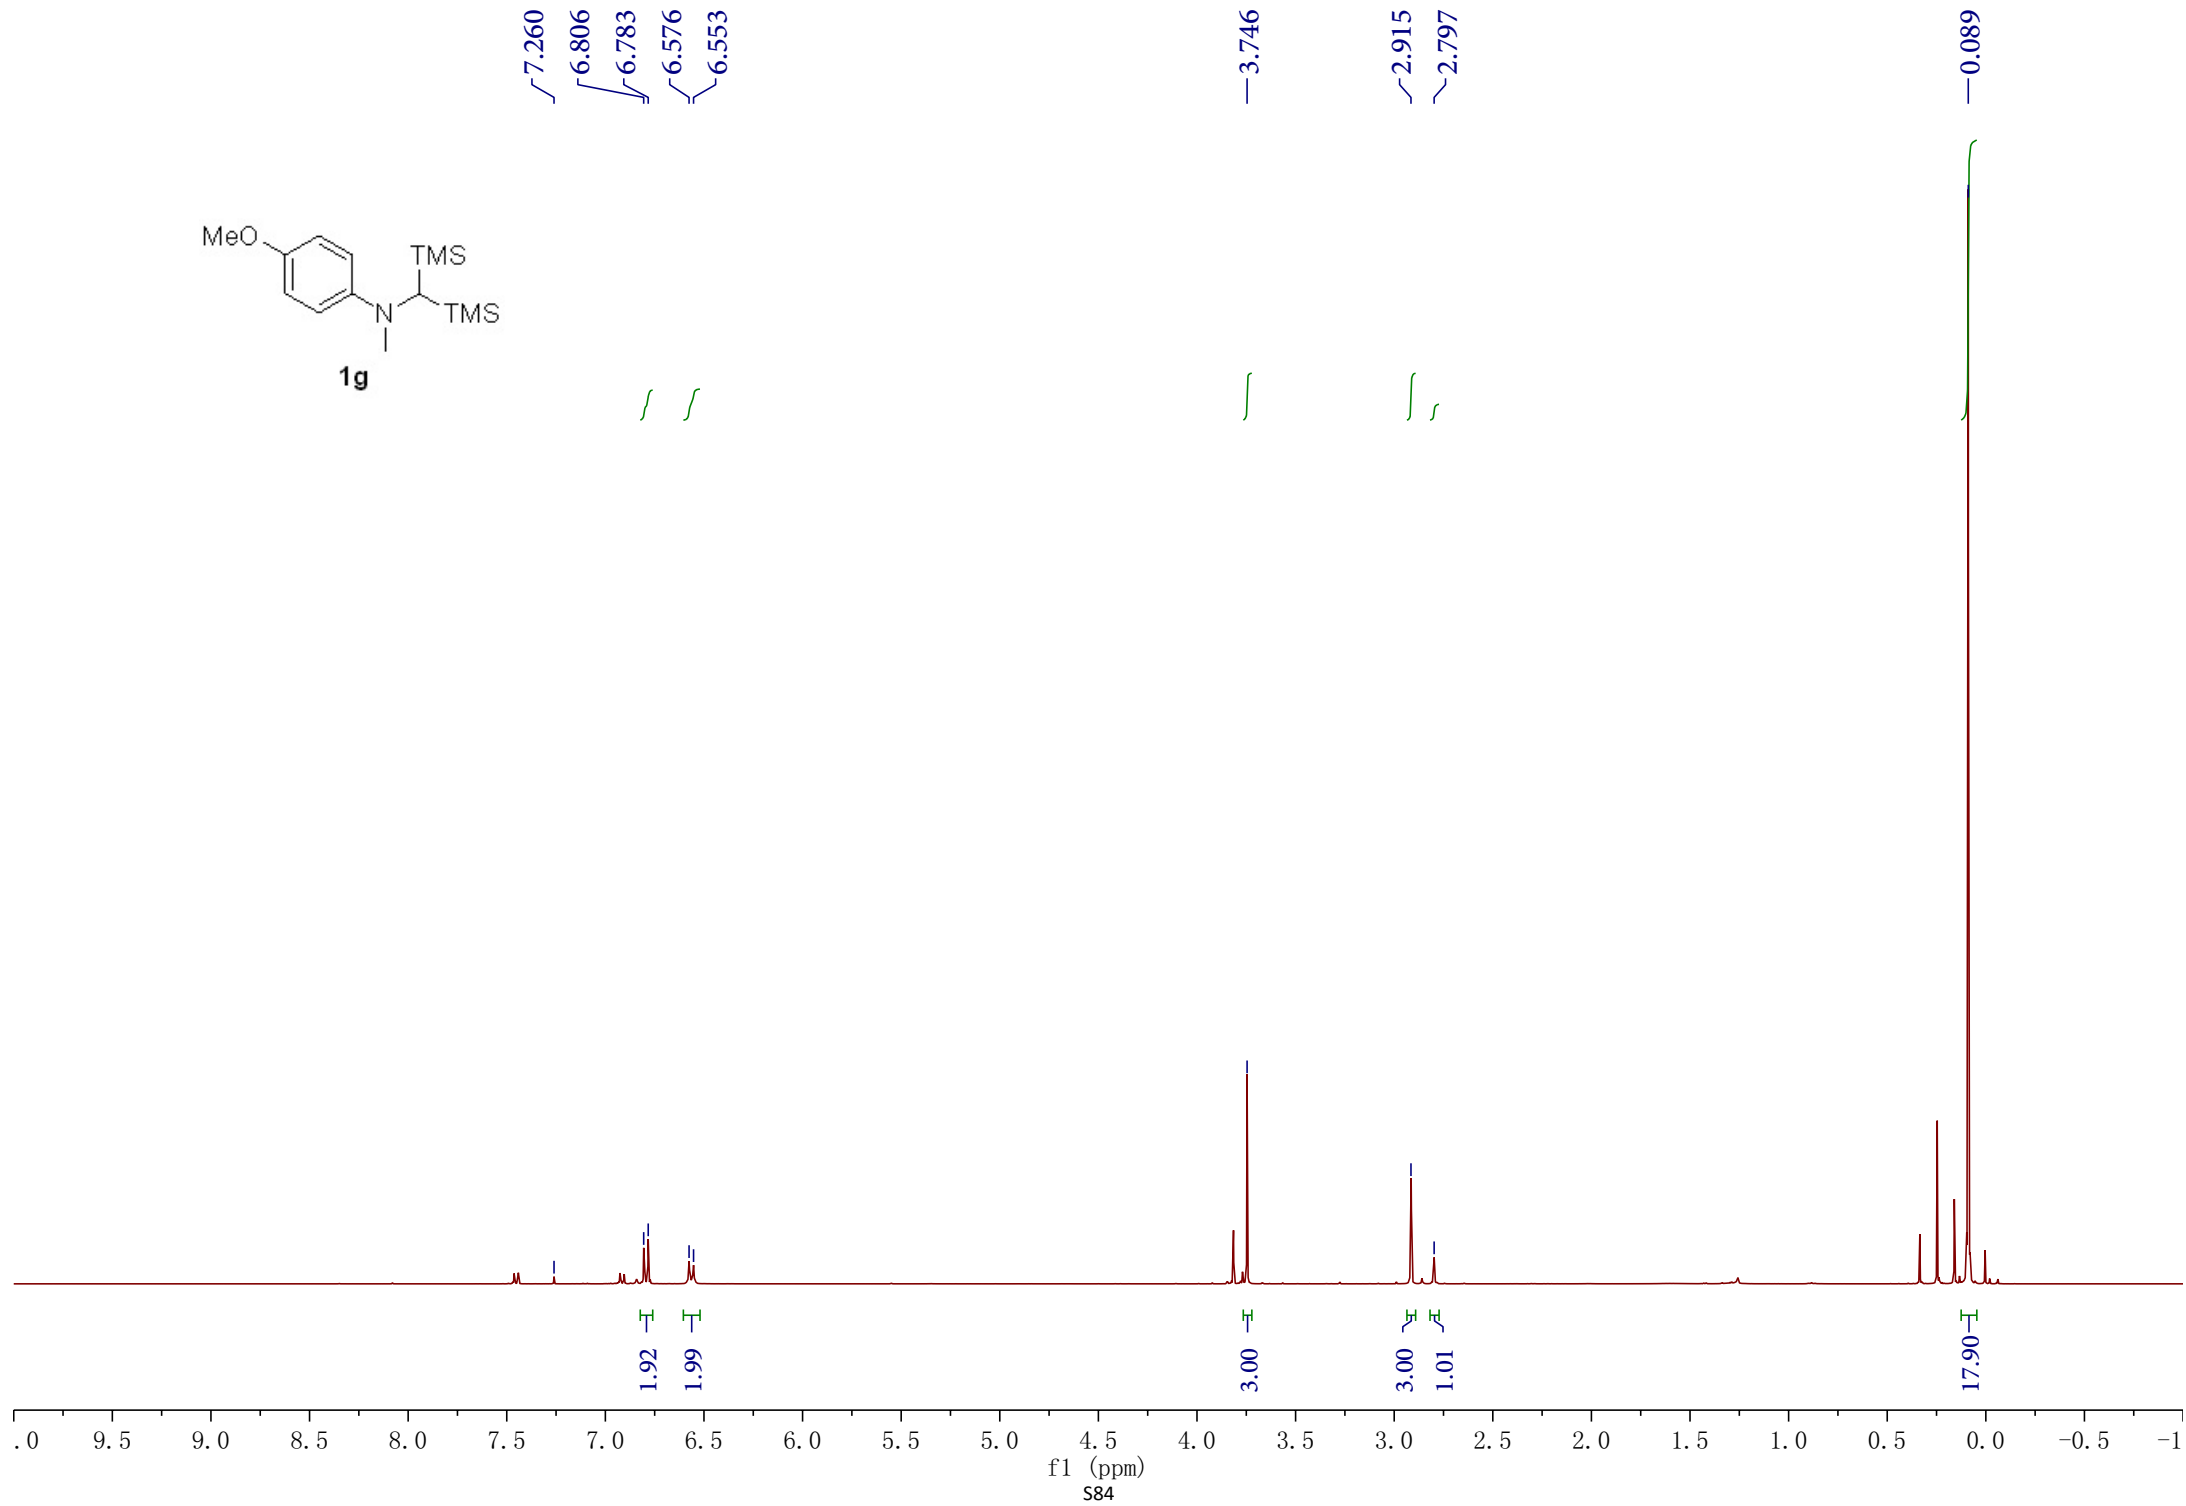

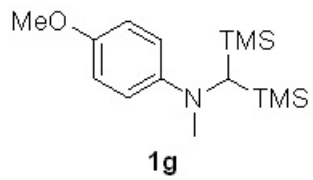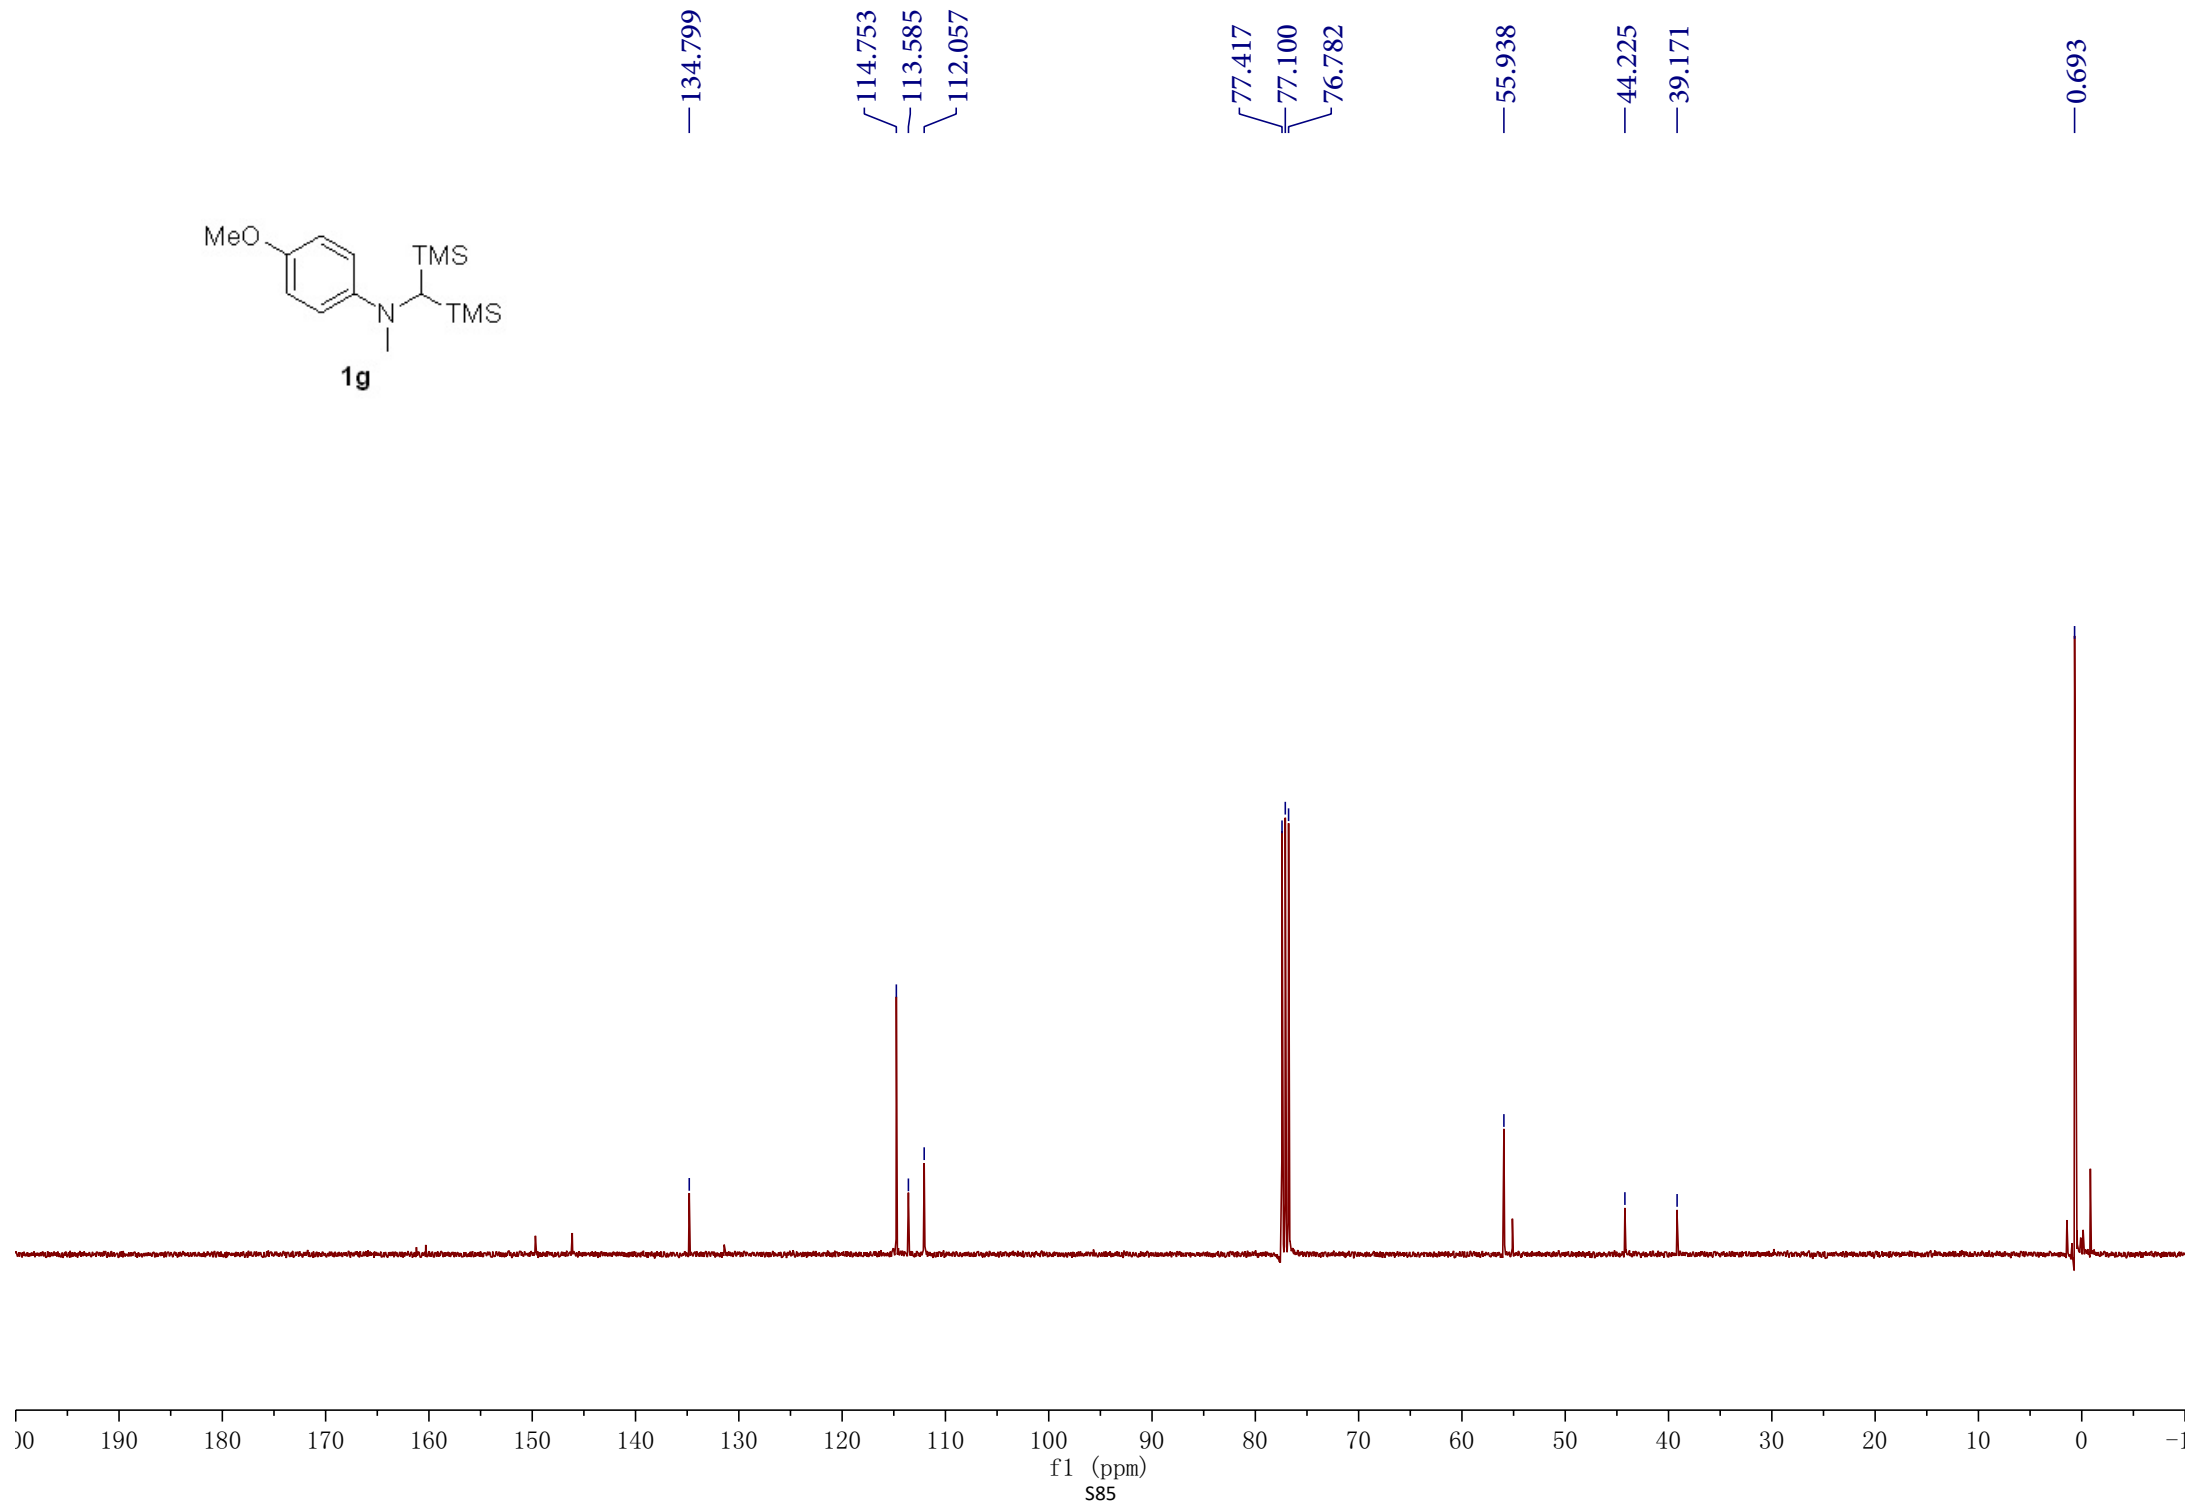

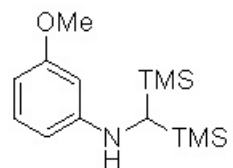

5h

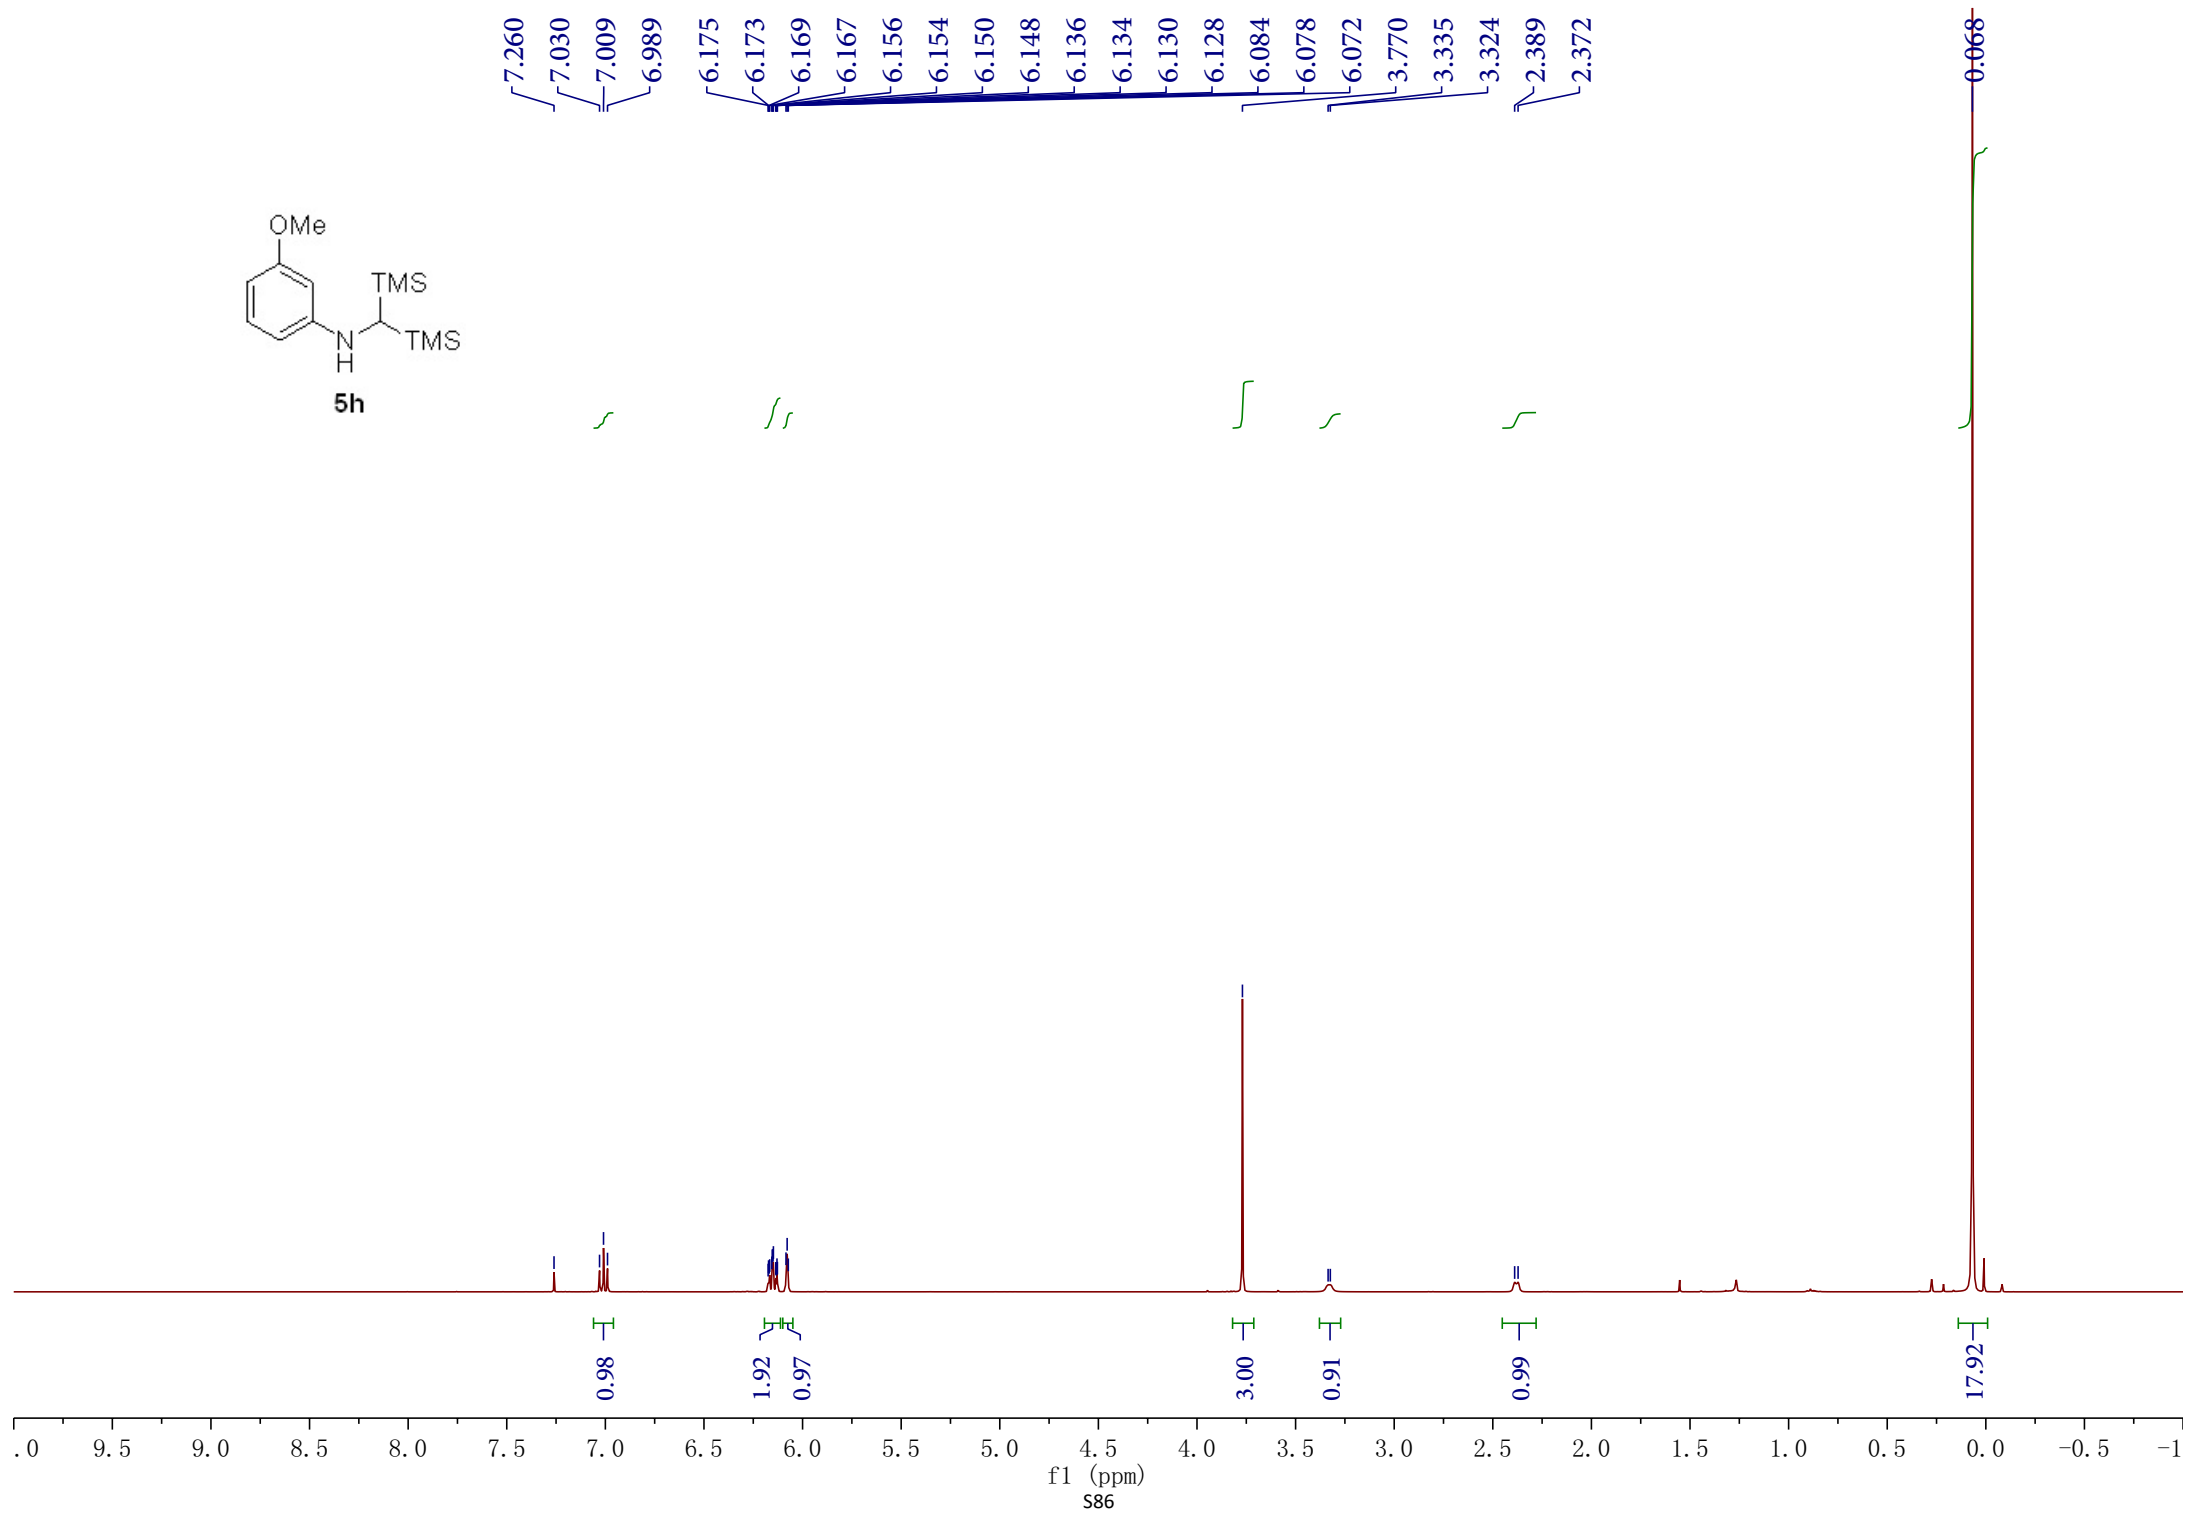



5h

160.878

151.579

129.720

105.878

100.567

98.107

77.418

77.100

76.782

55.084

34.439

-0.981

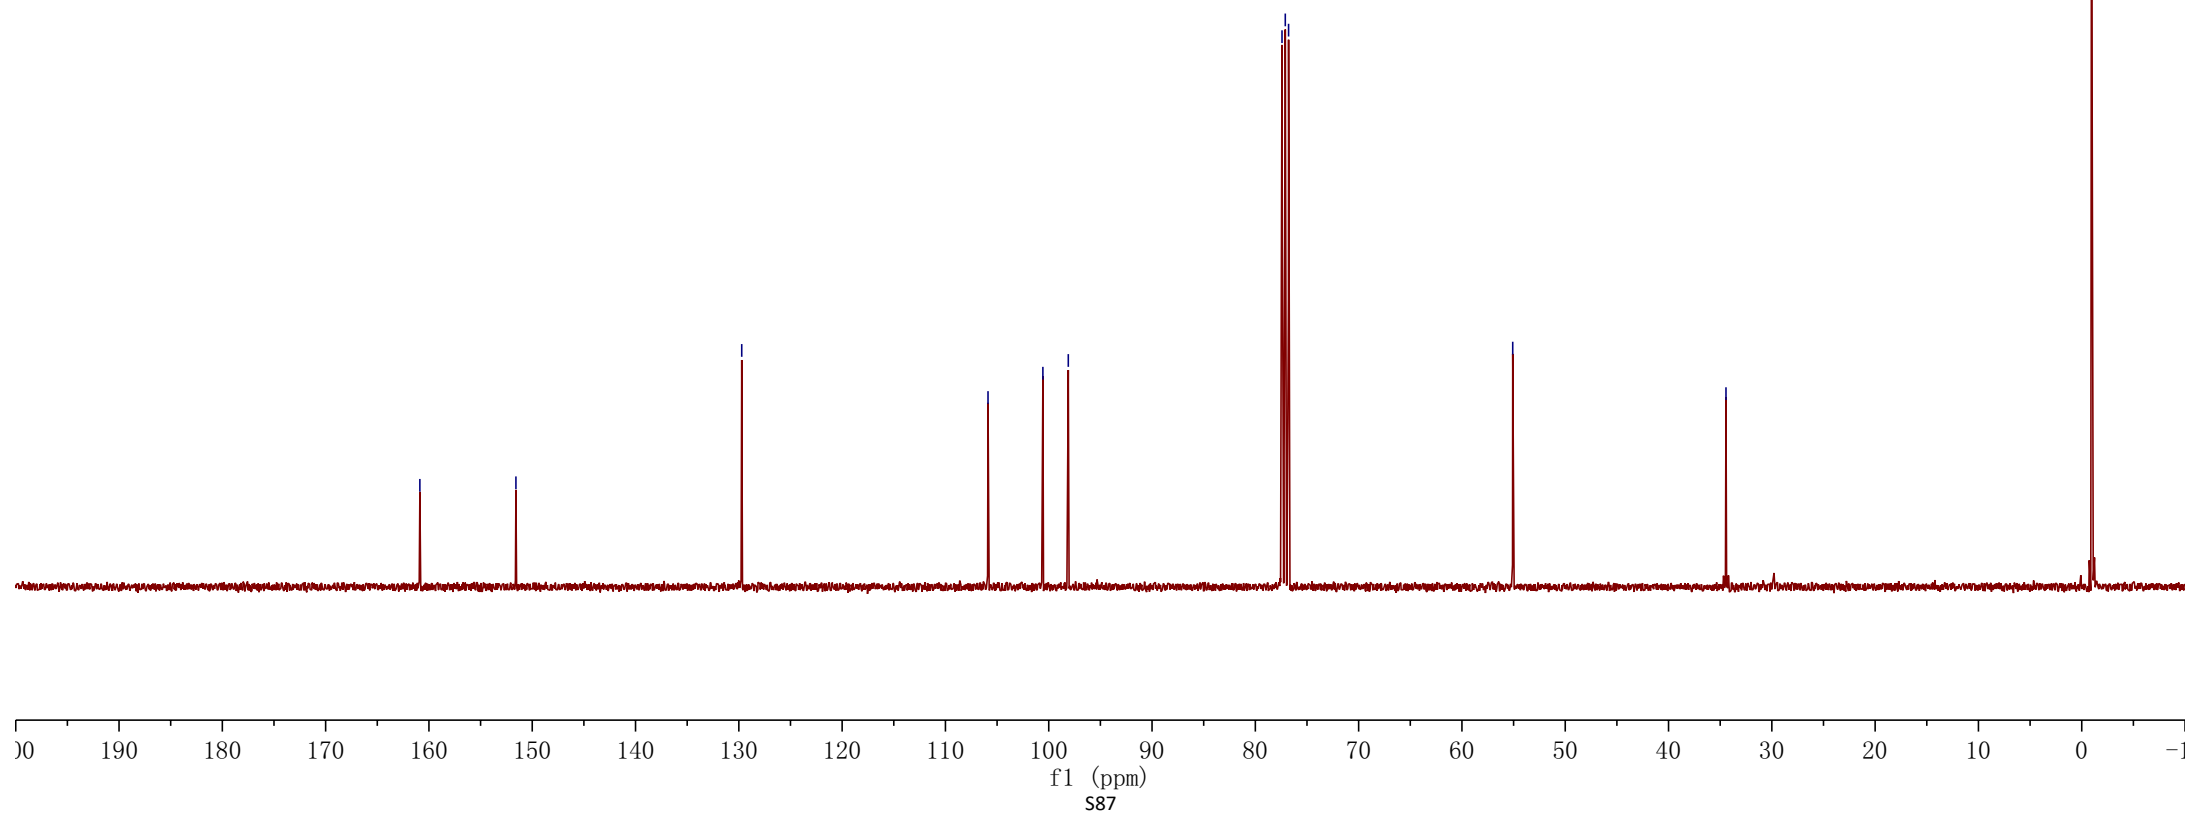

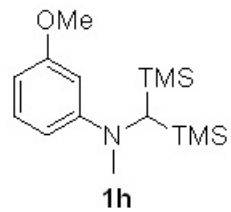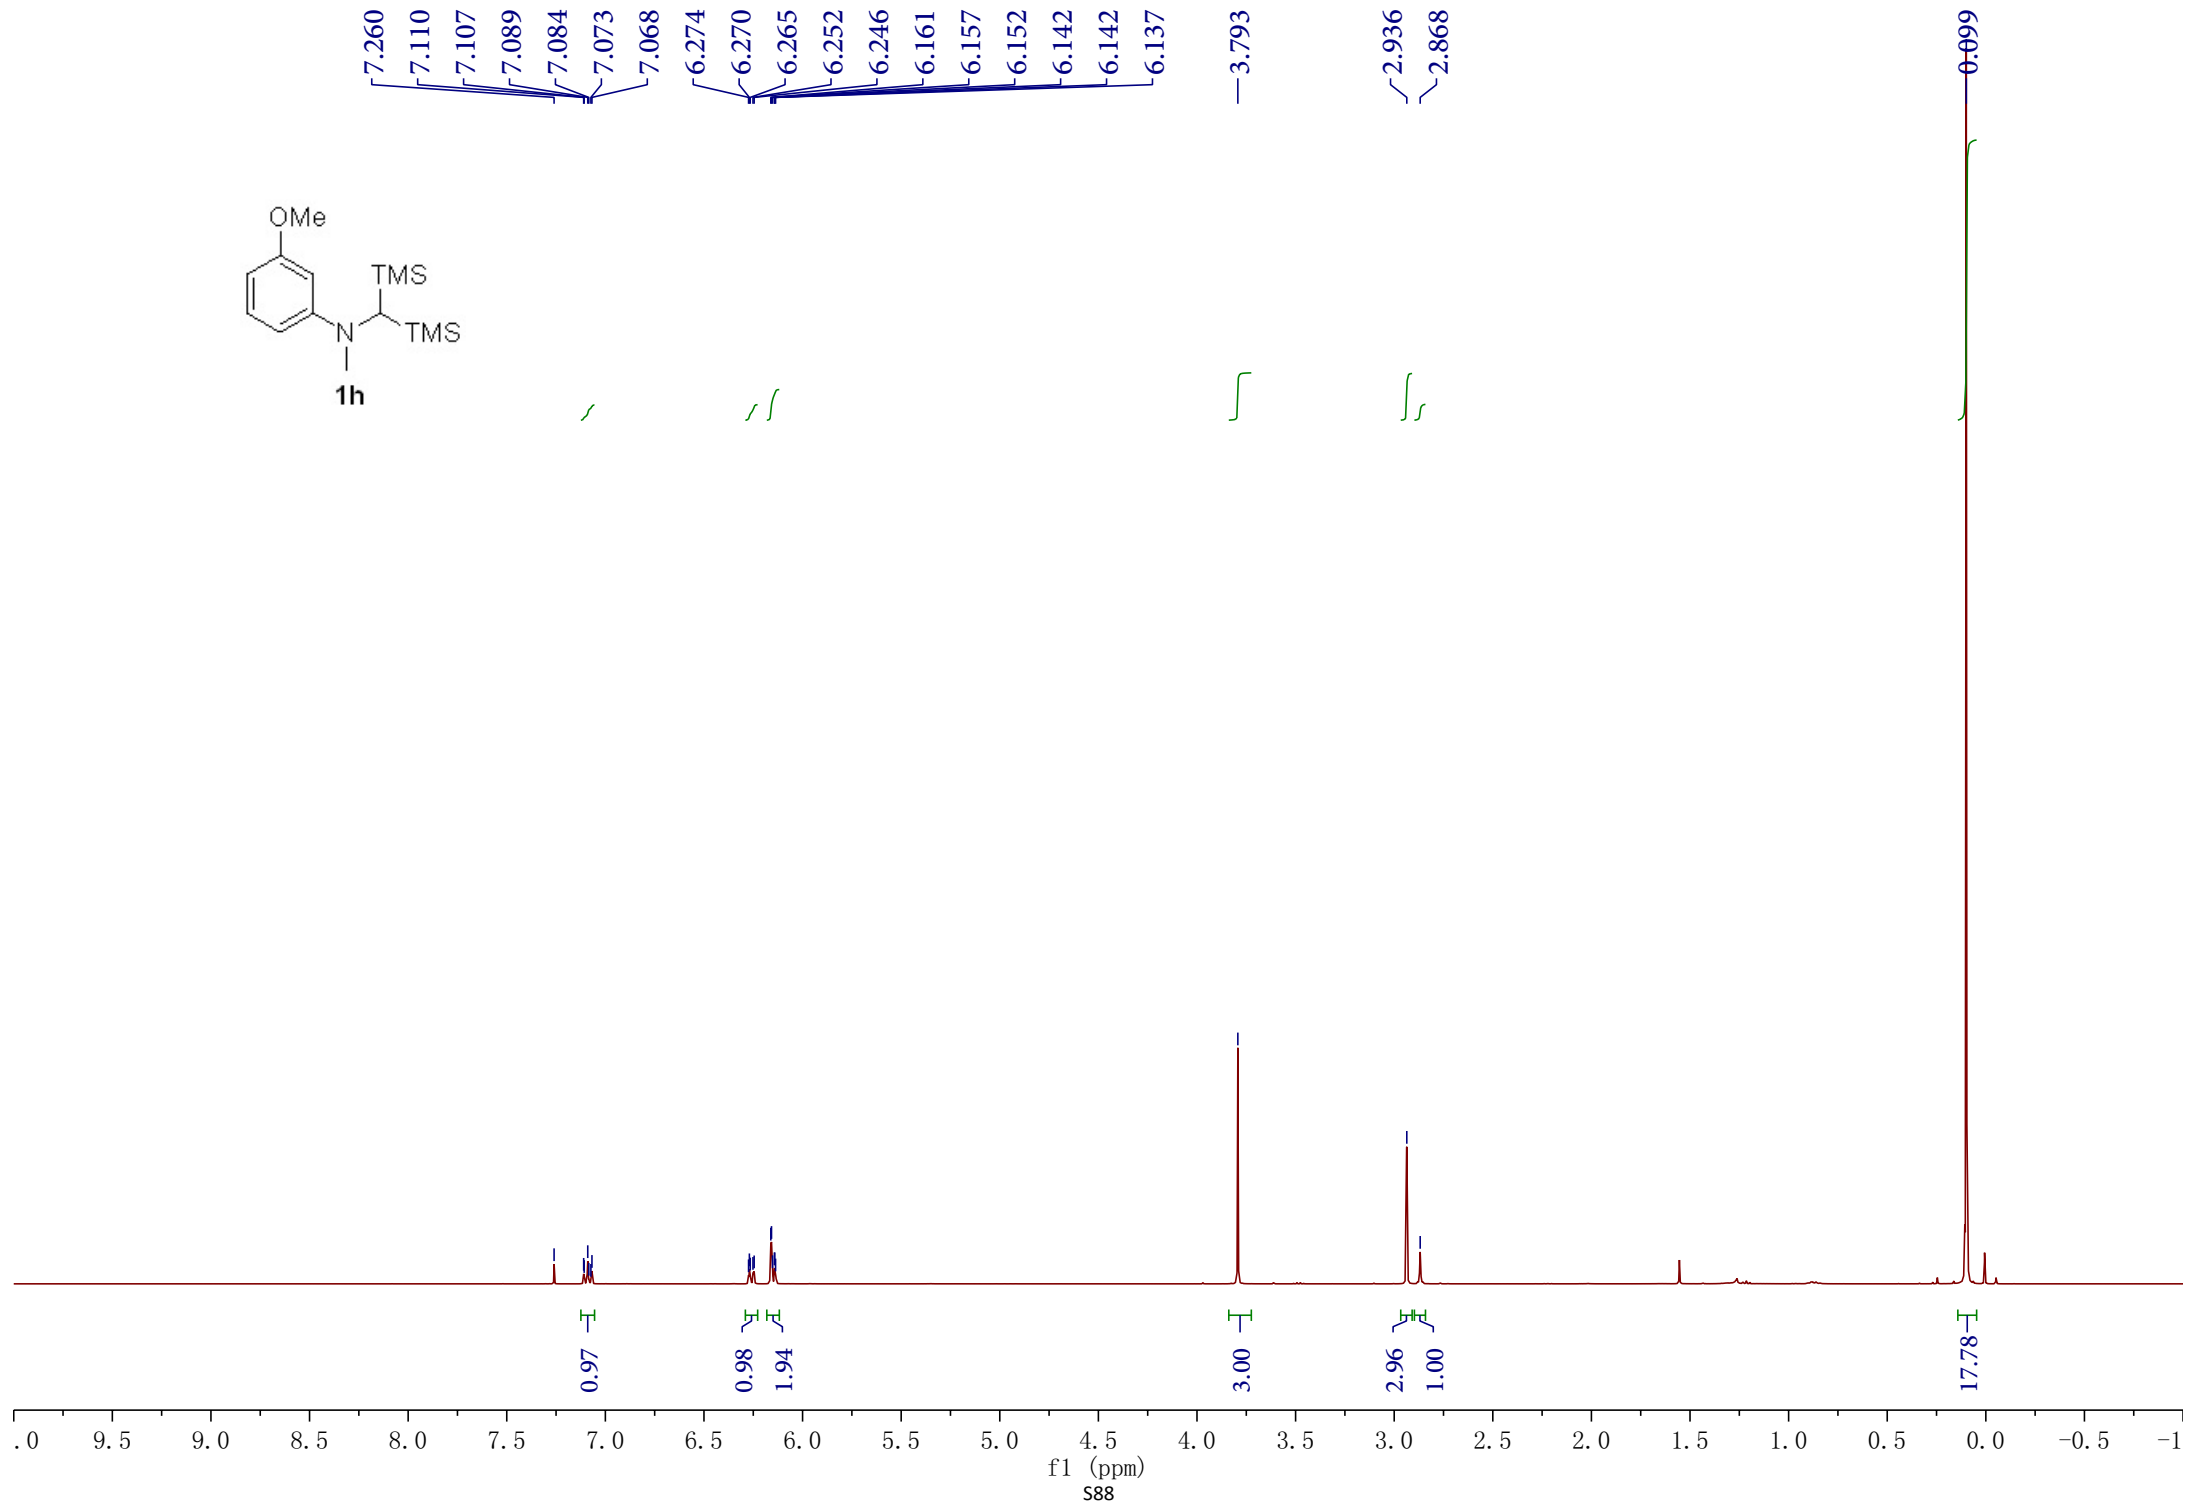



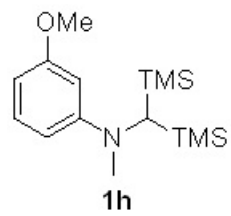

—160.735

—152.123

—129.567

—104.670

—98.567

—97.811

—77.417

—77.100

—76.782

—55.106

—43.684

—38.989

—0.559

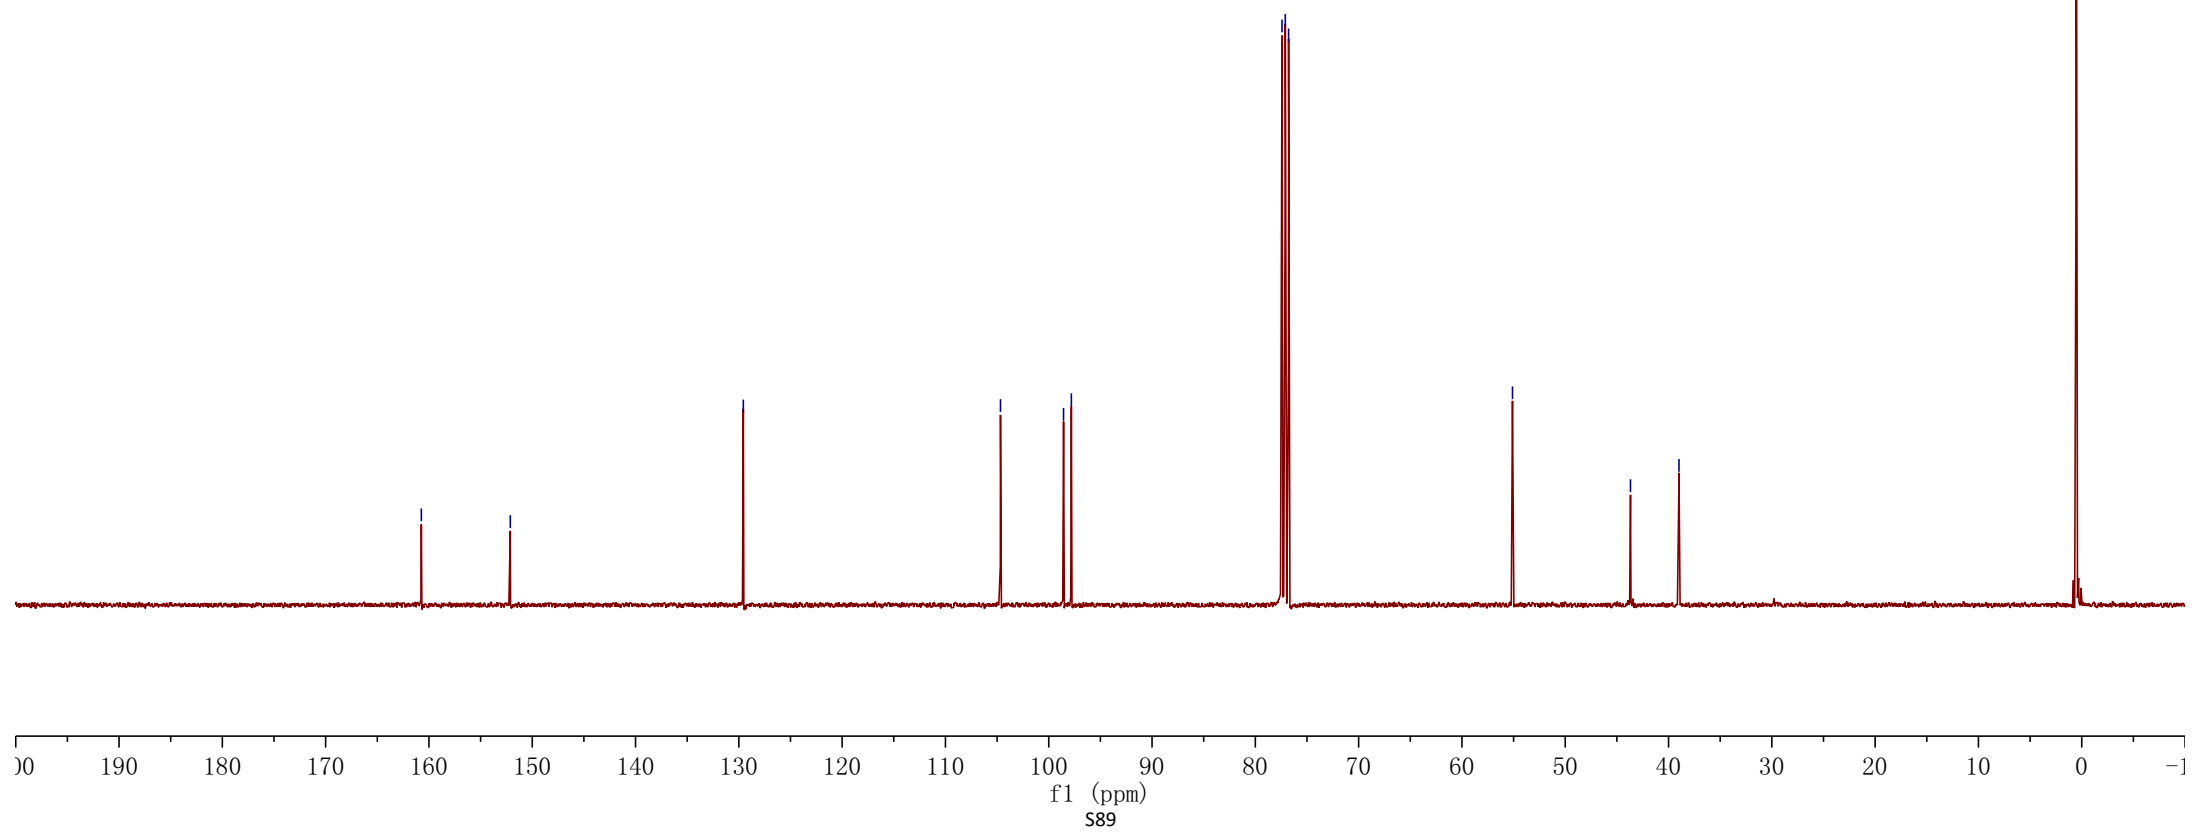

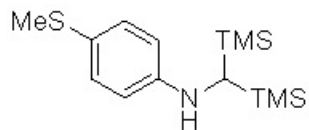

5i

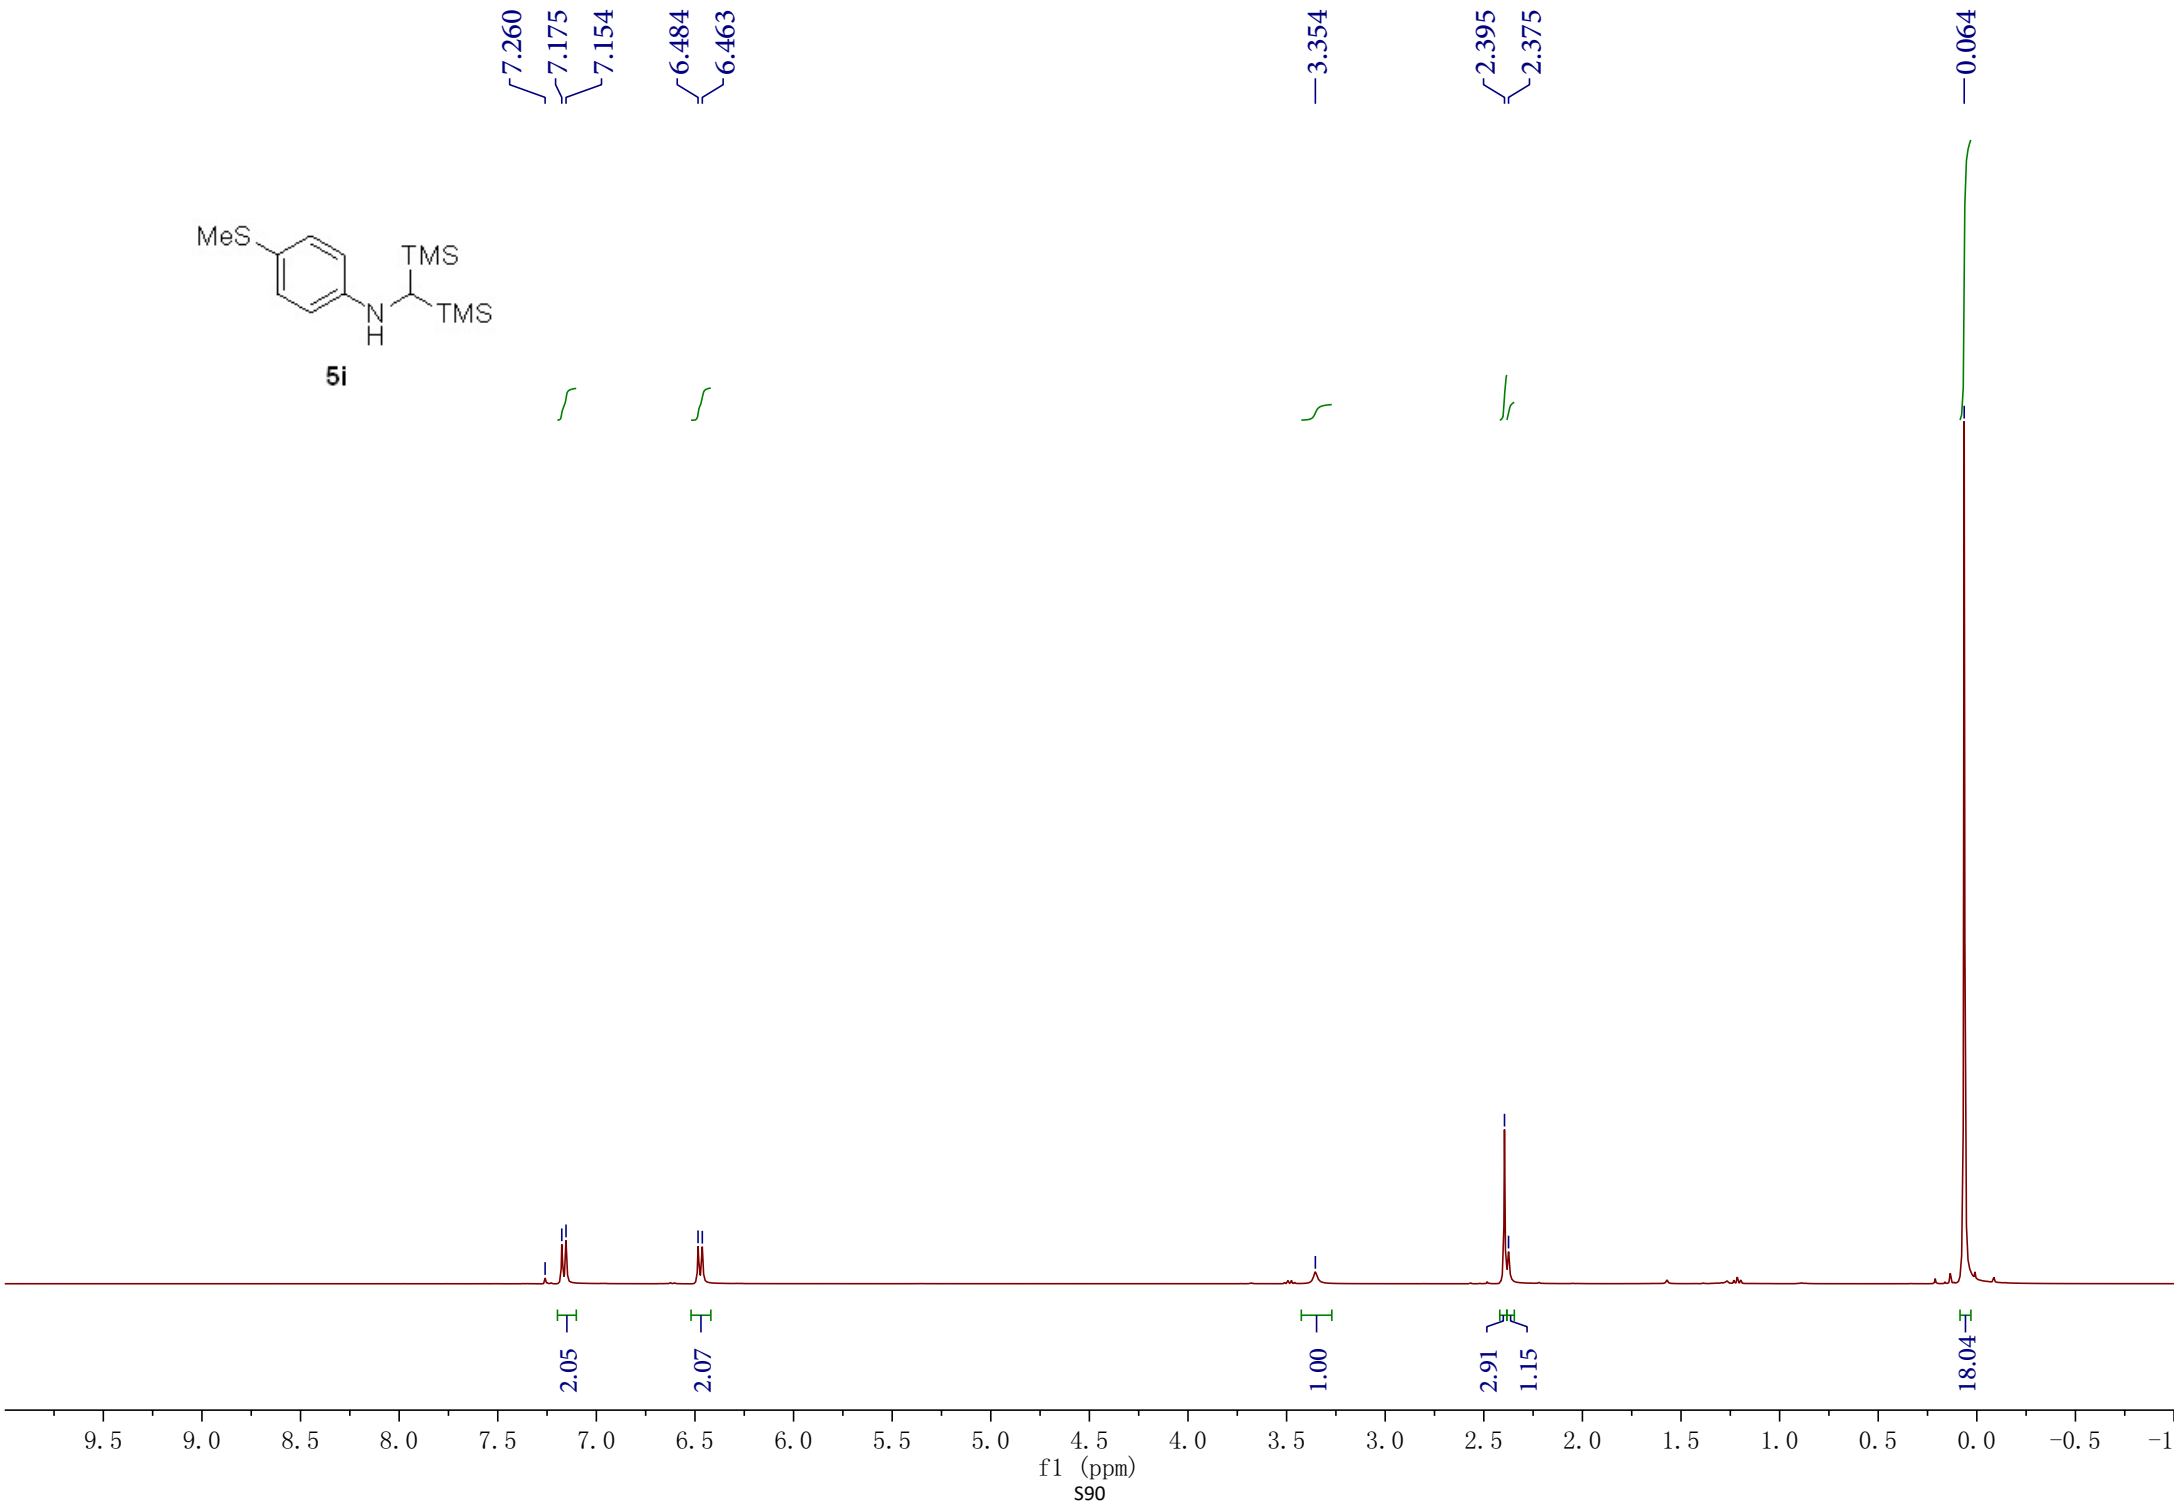

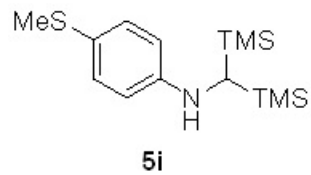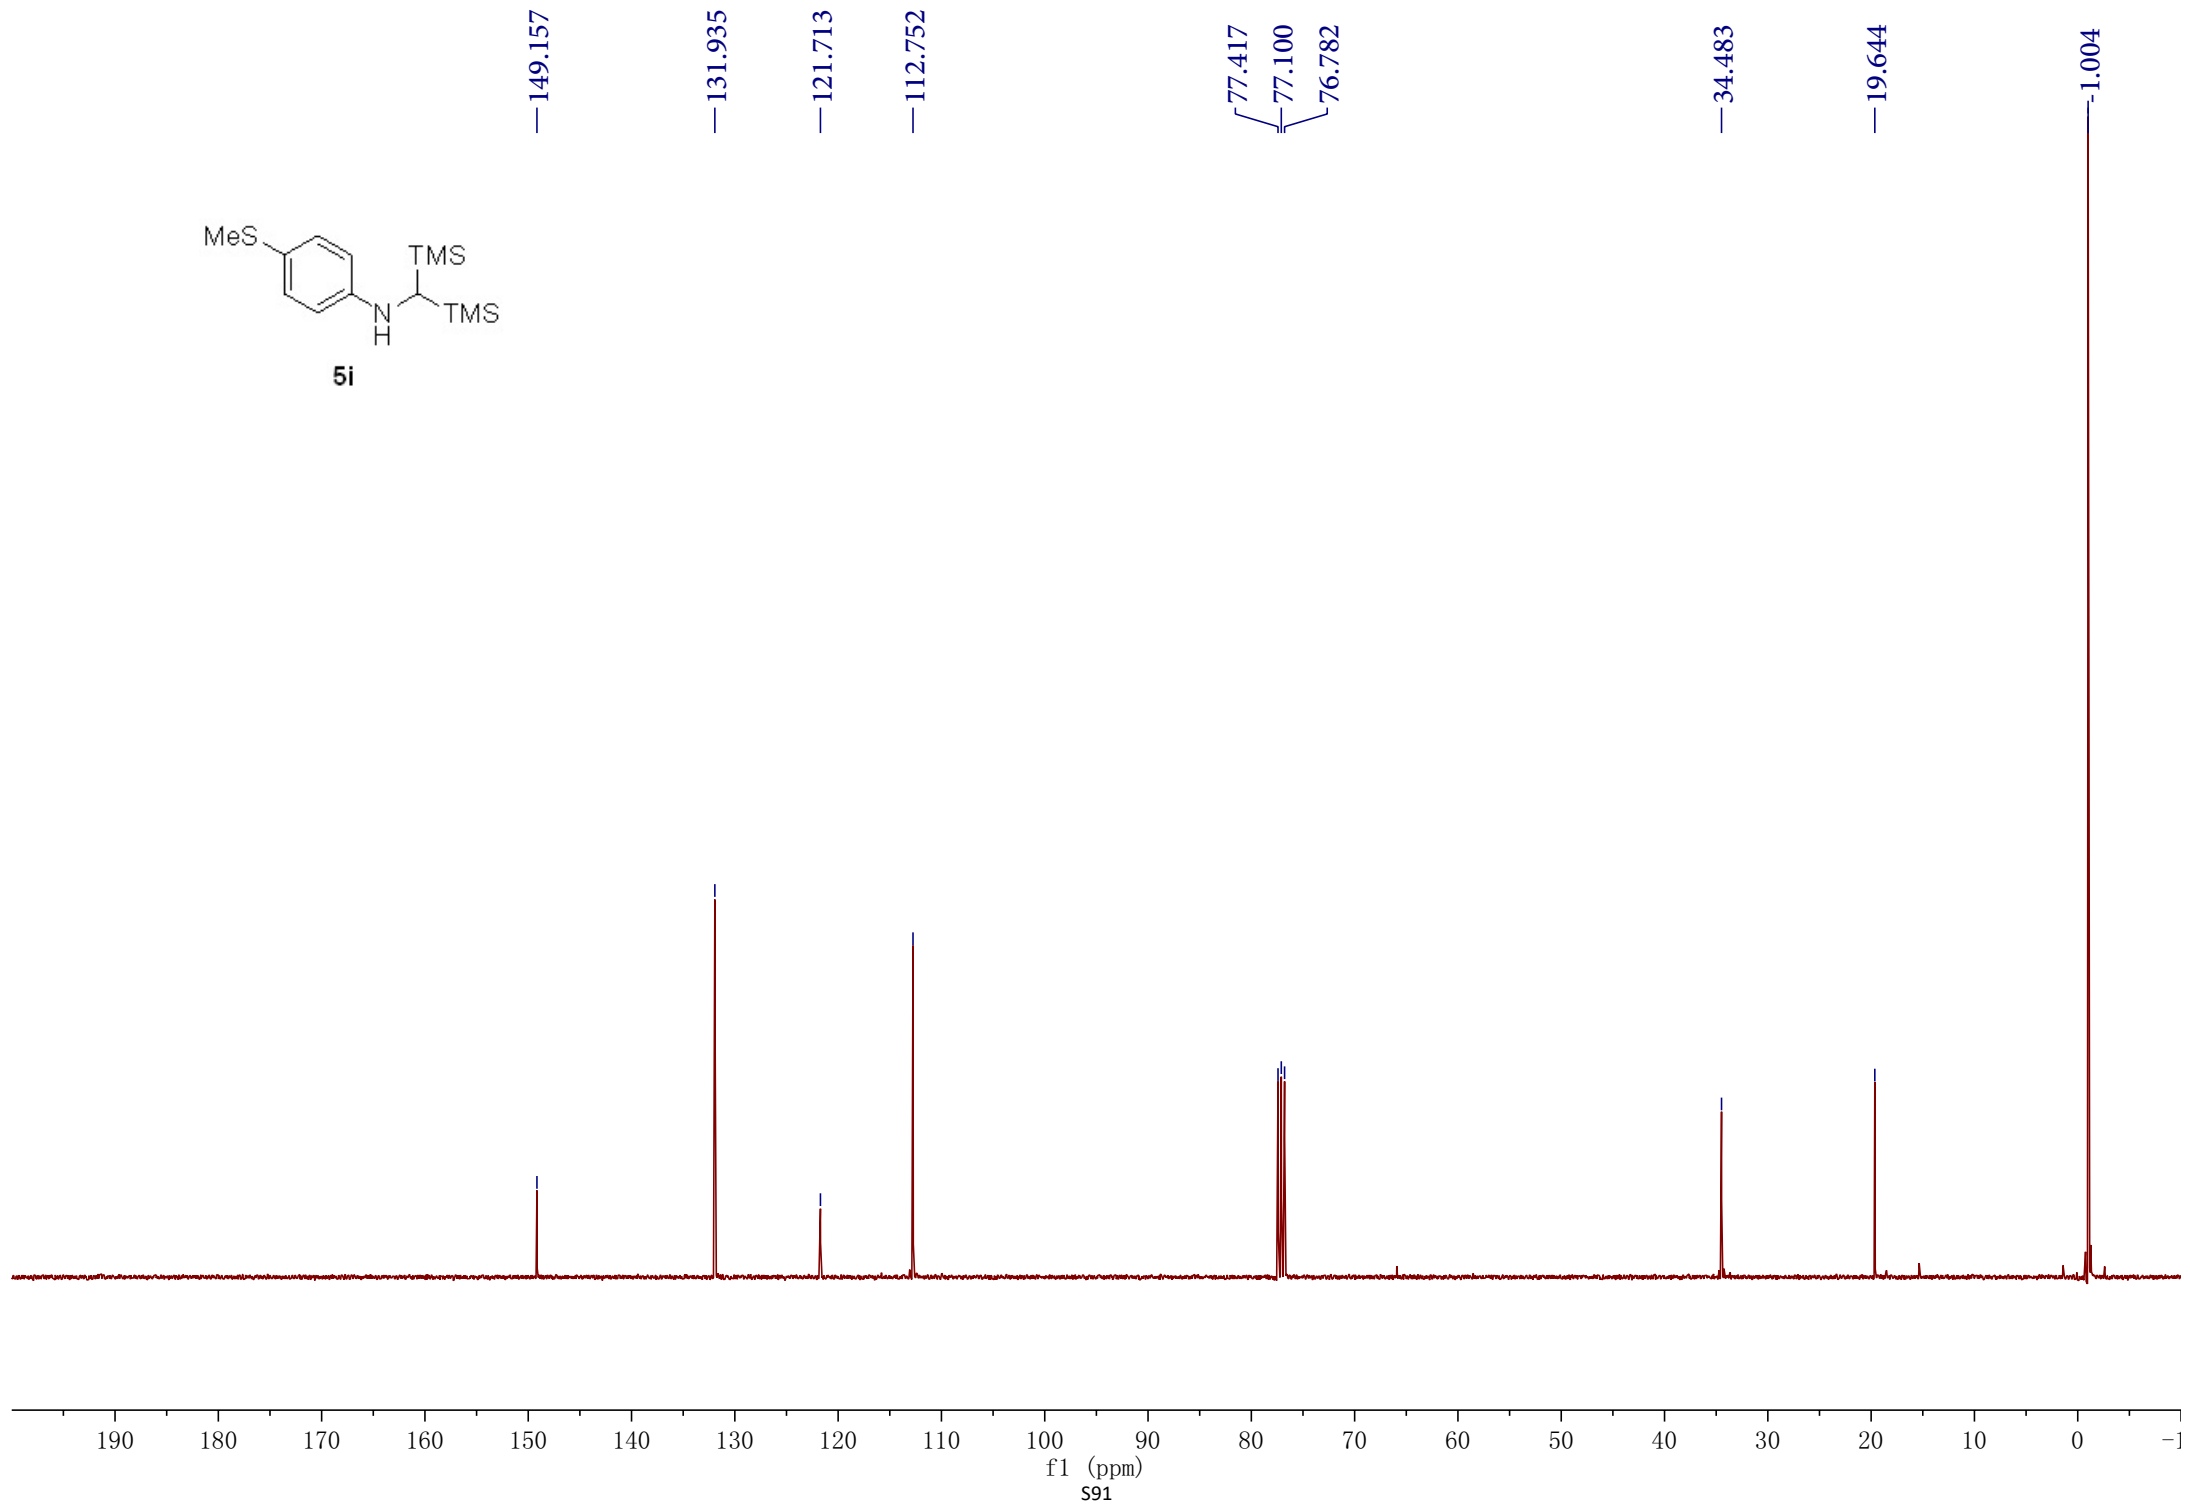

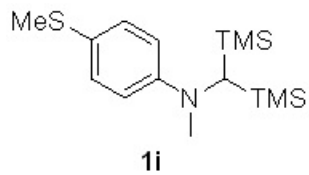

7.260  
7.239  
7.216  
6.563  
6.541

2.938  
2.859  
2.401

0.998

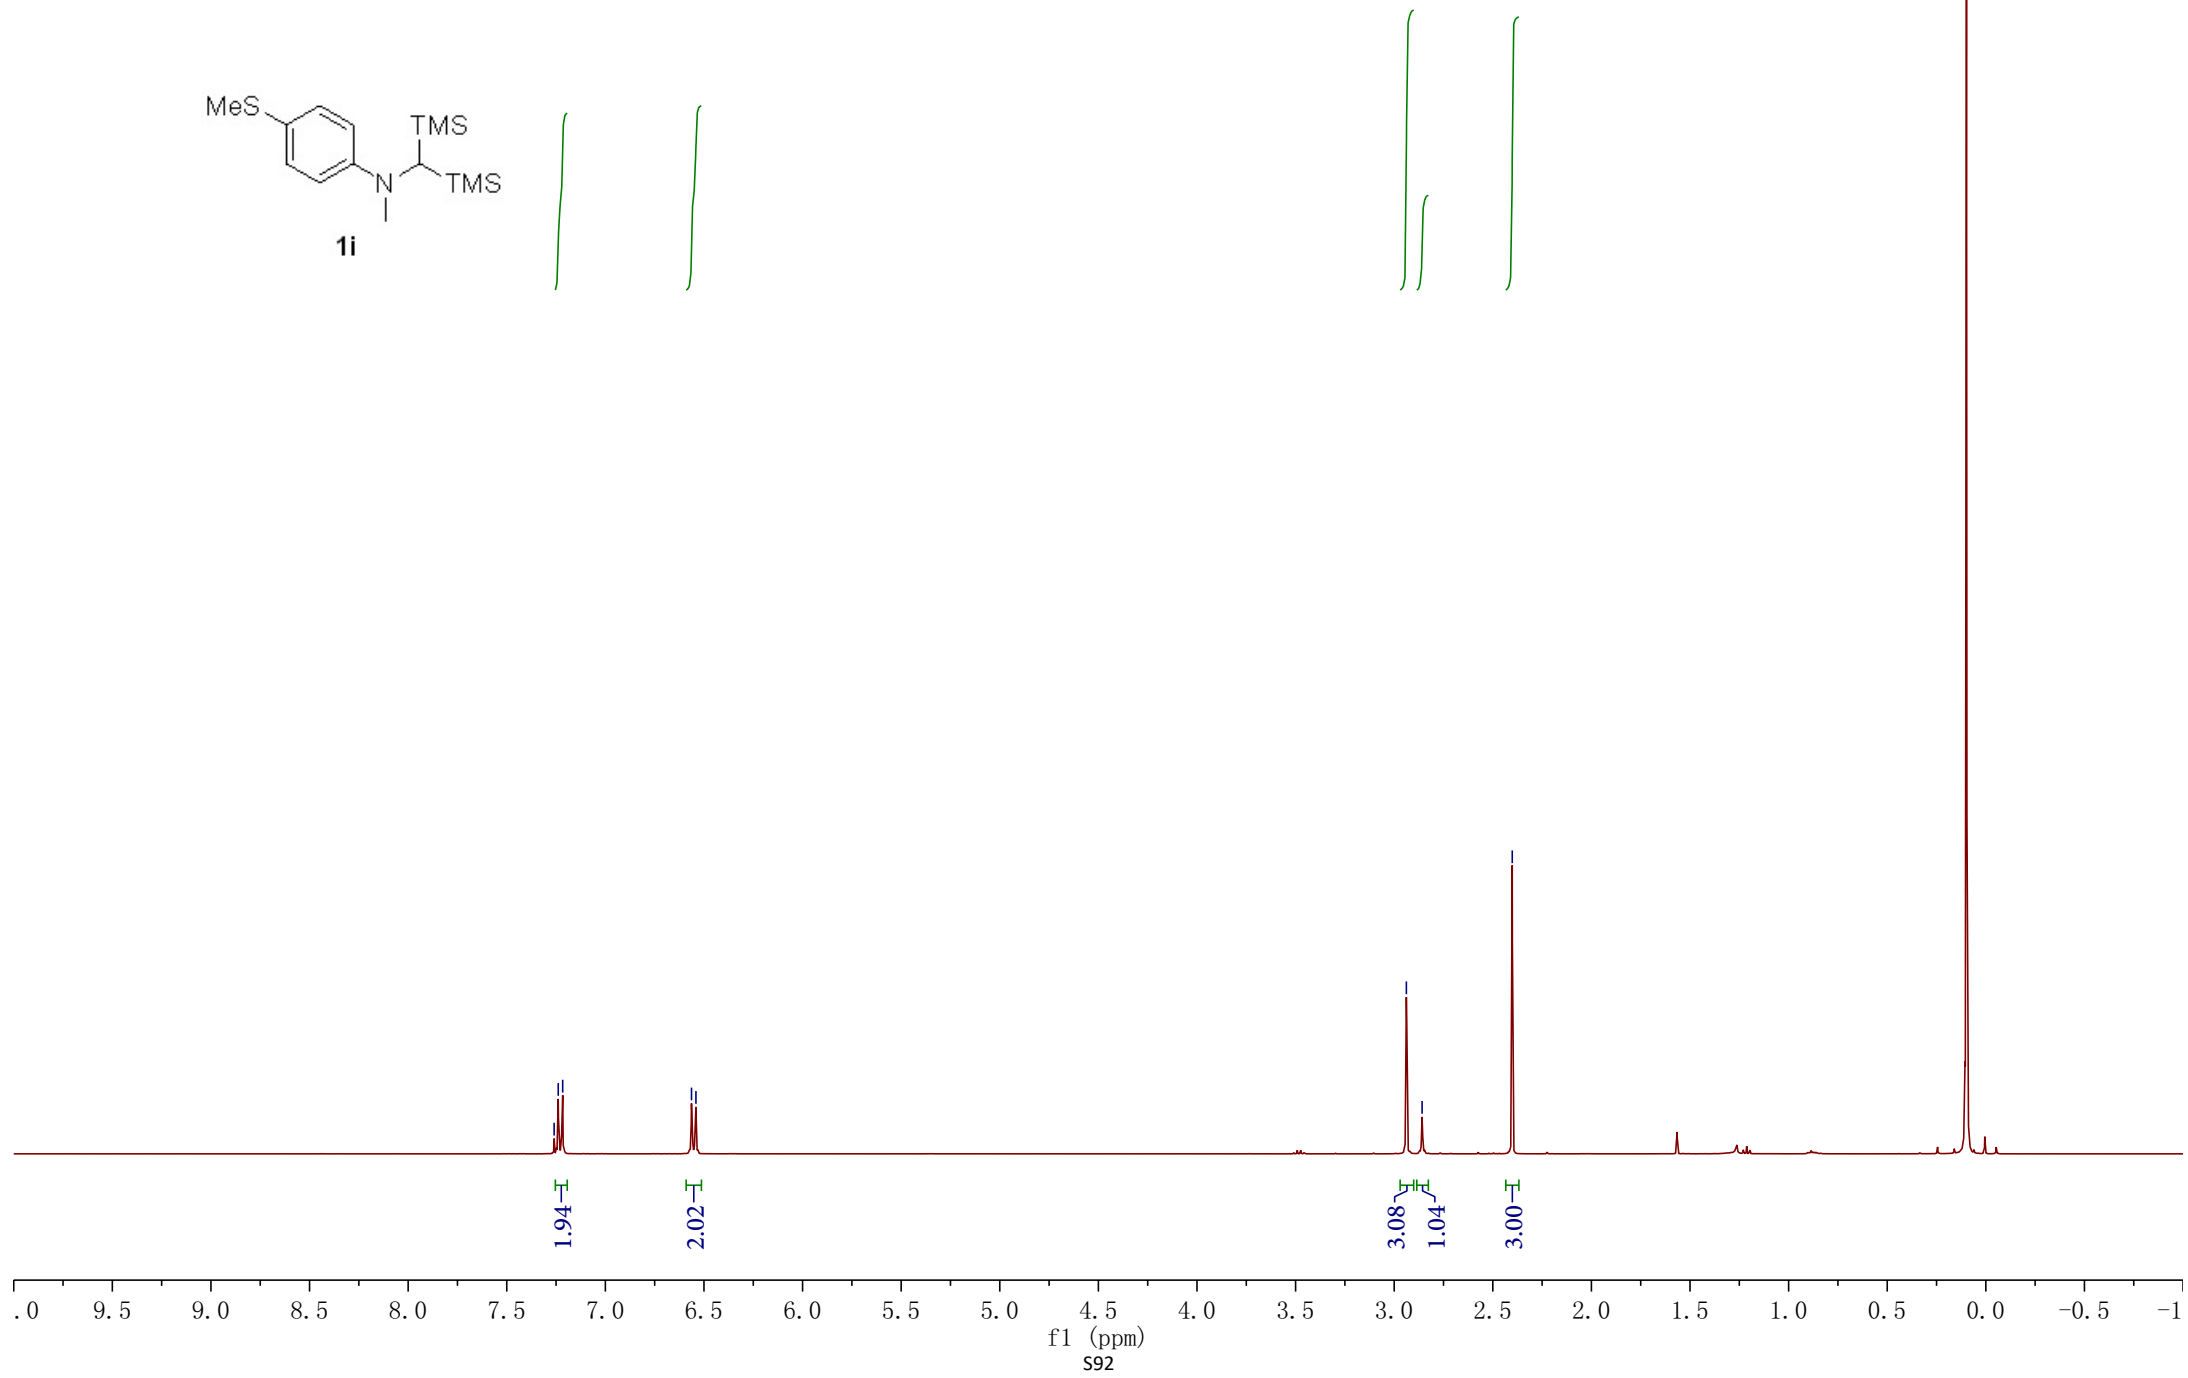

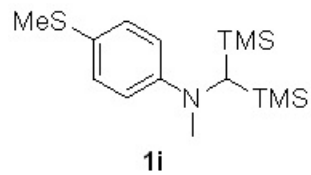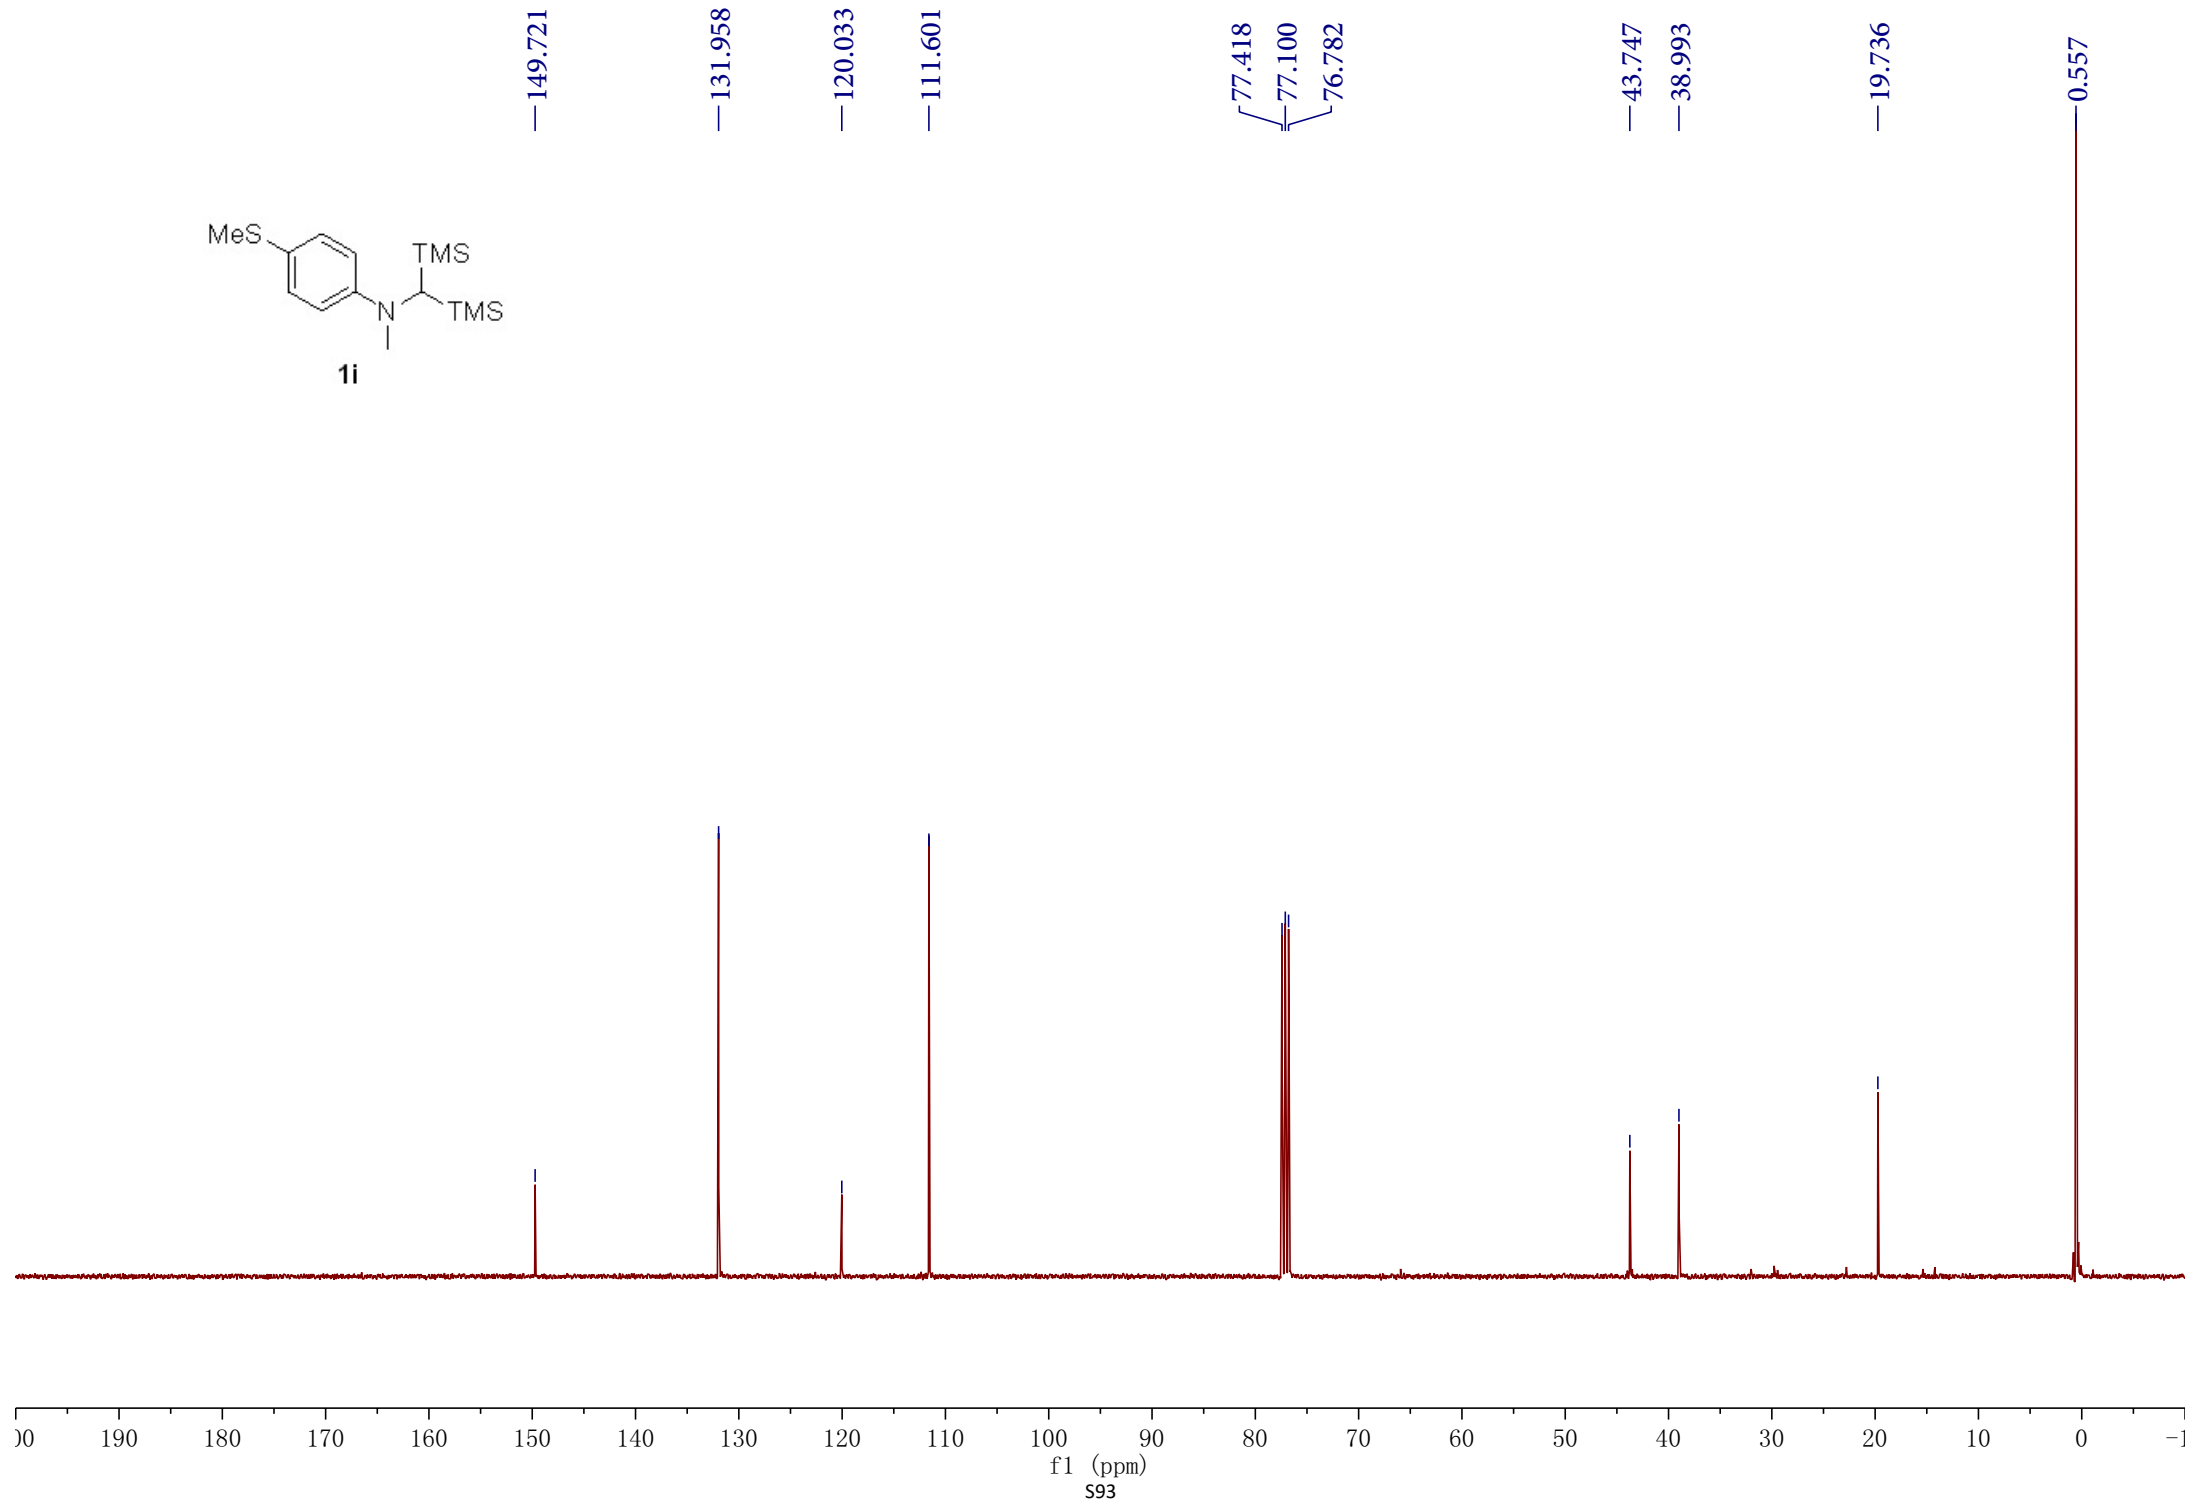

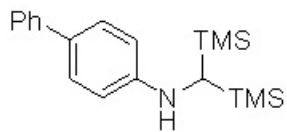

5j

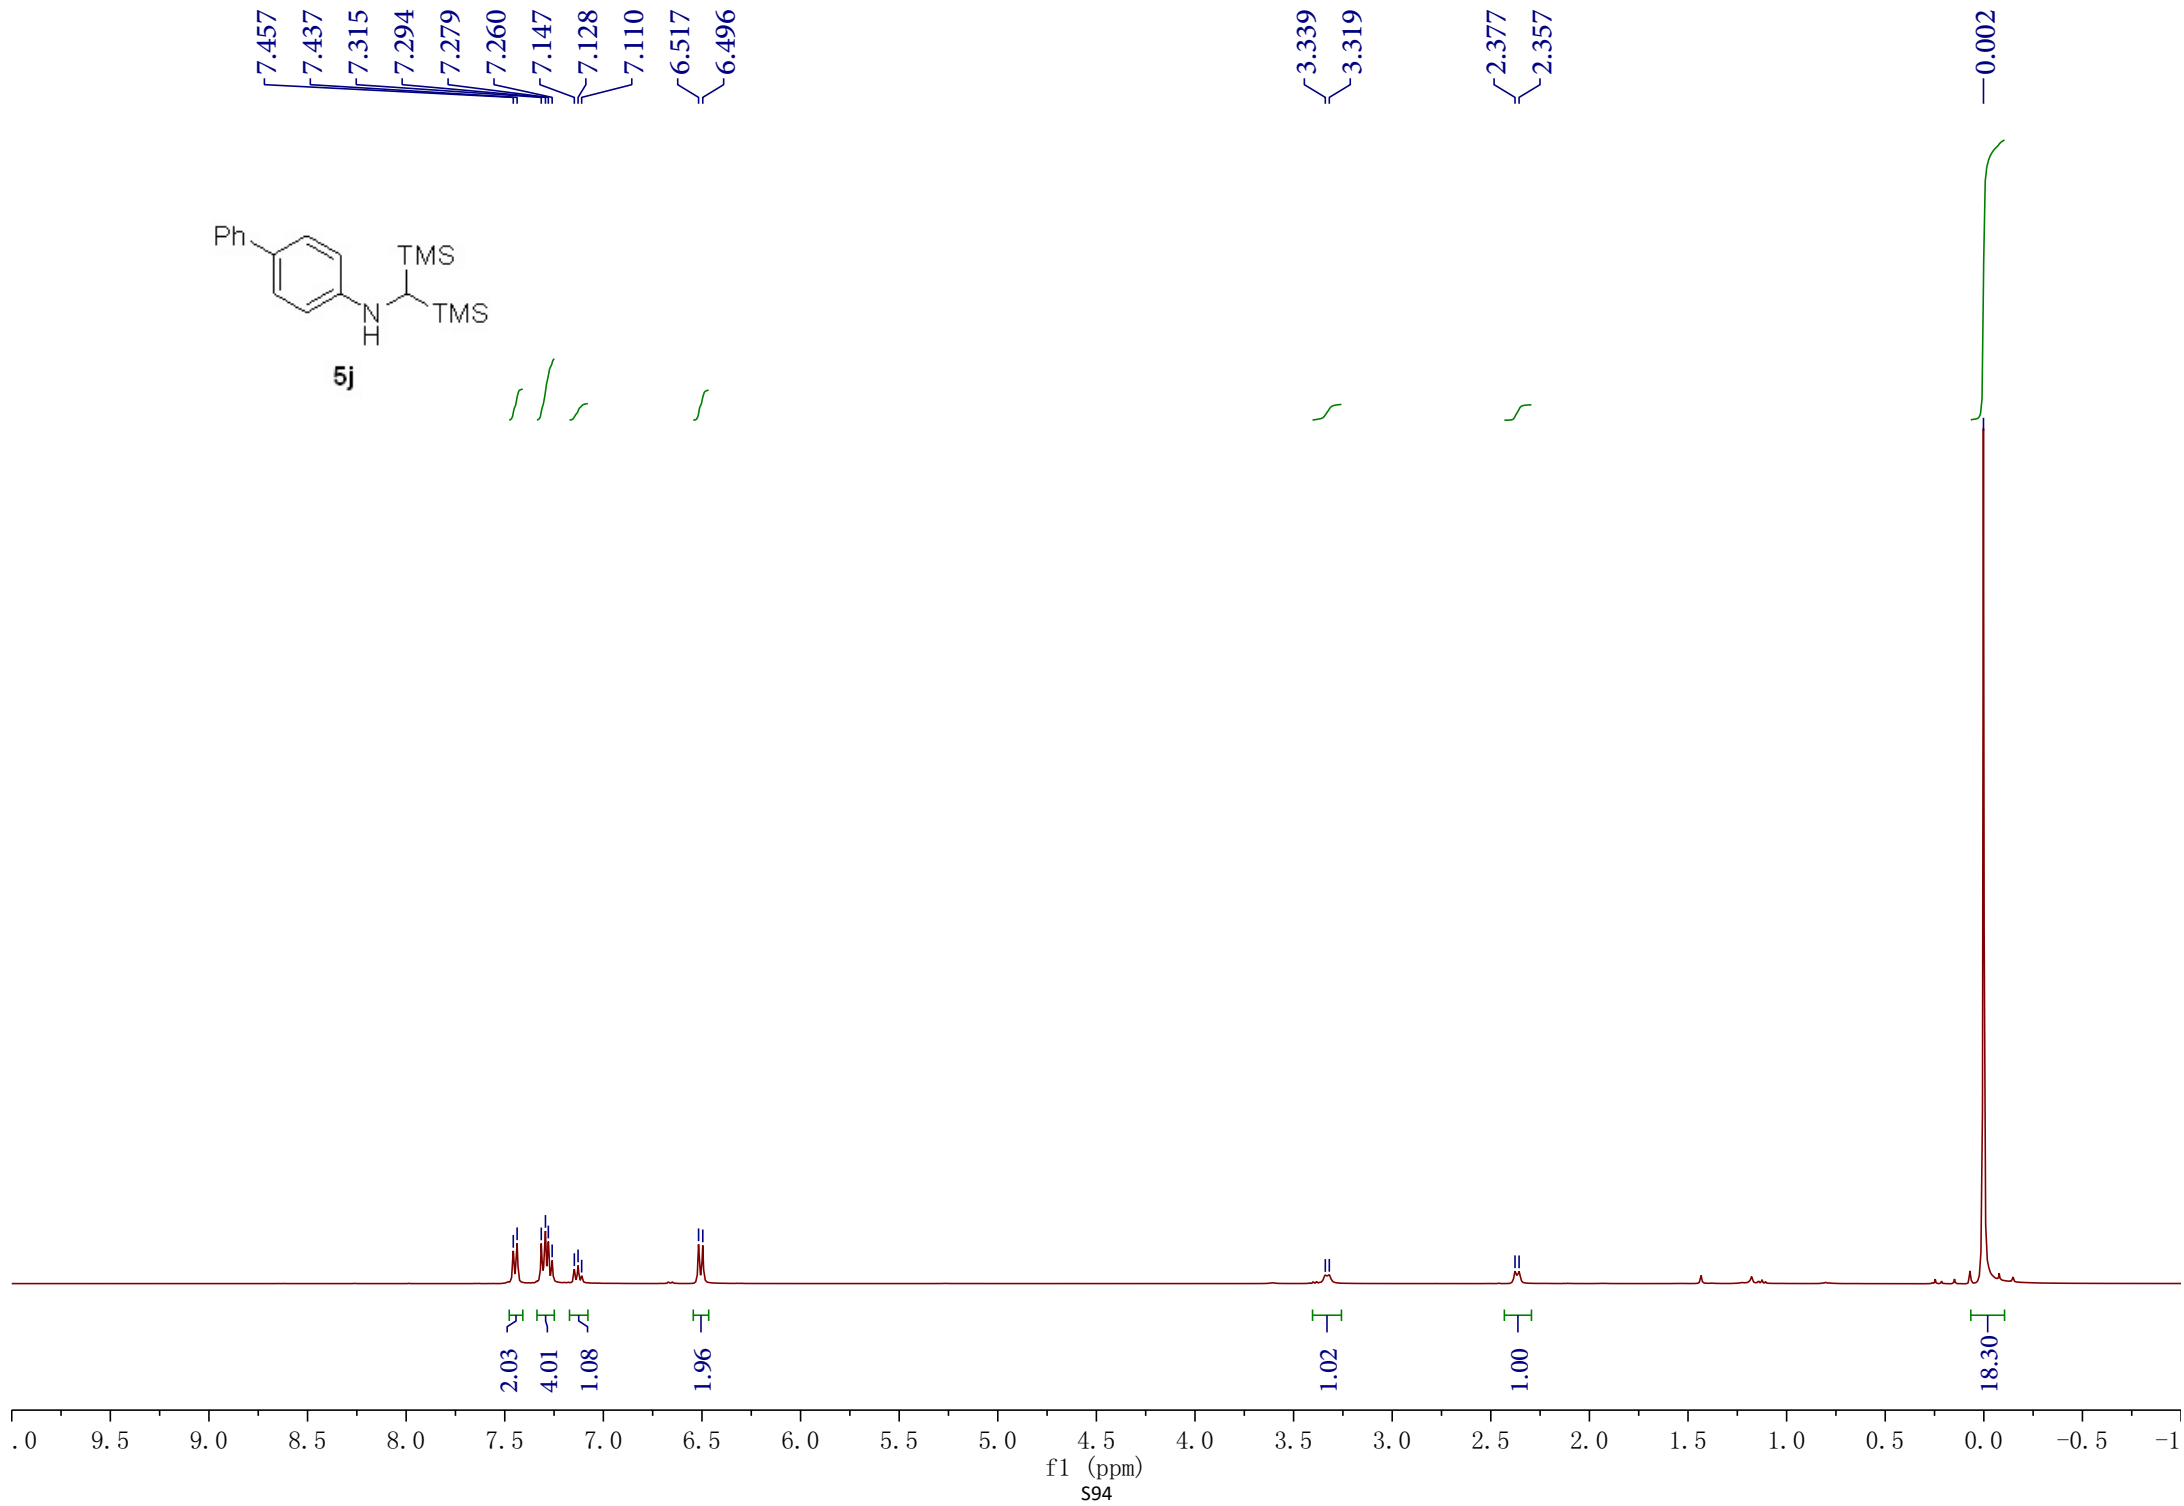

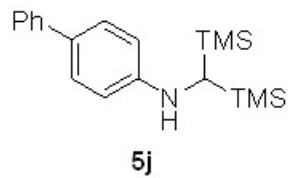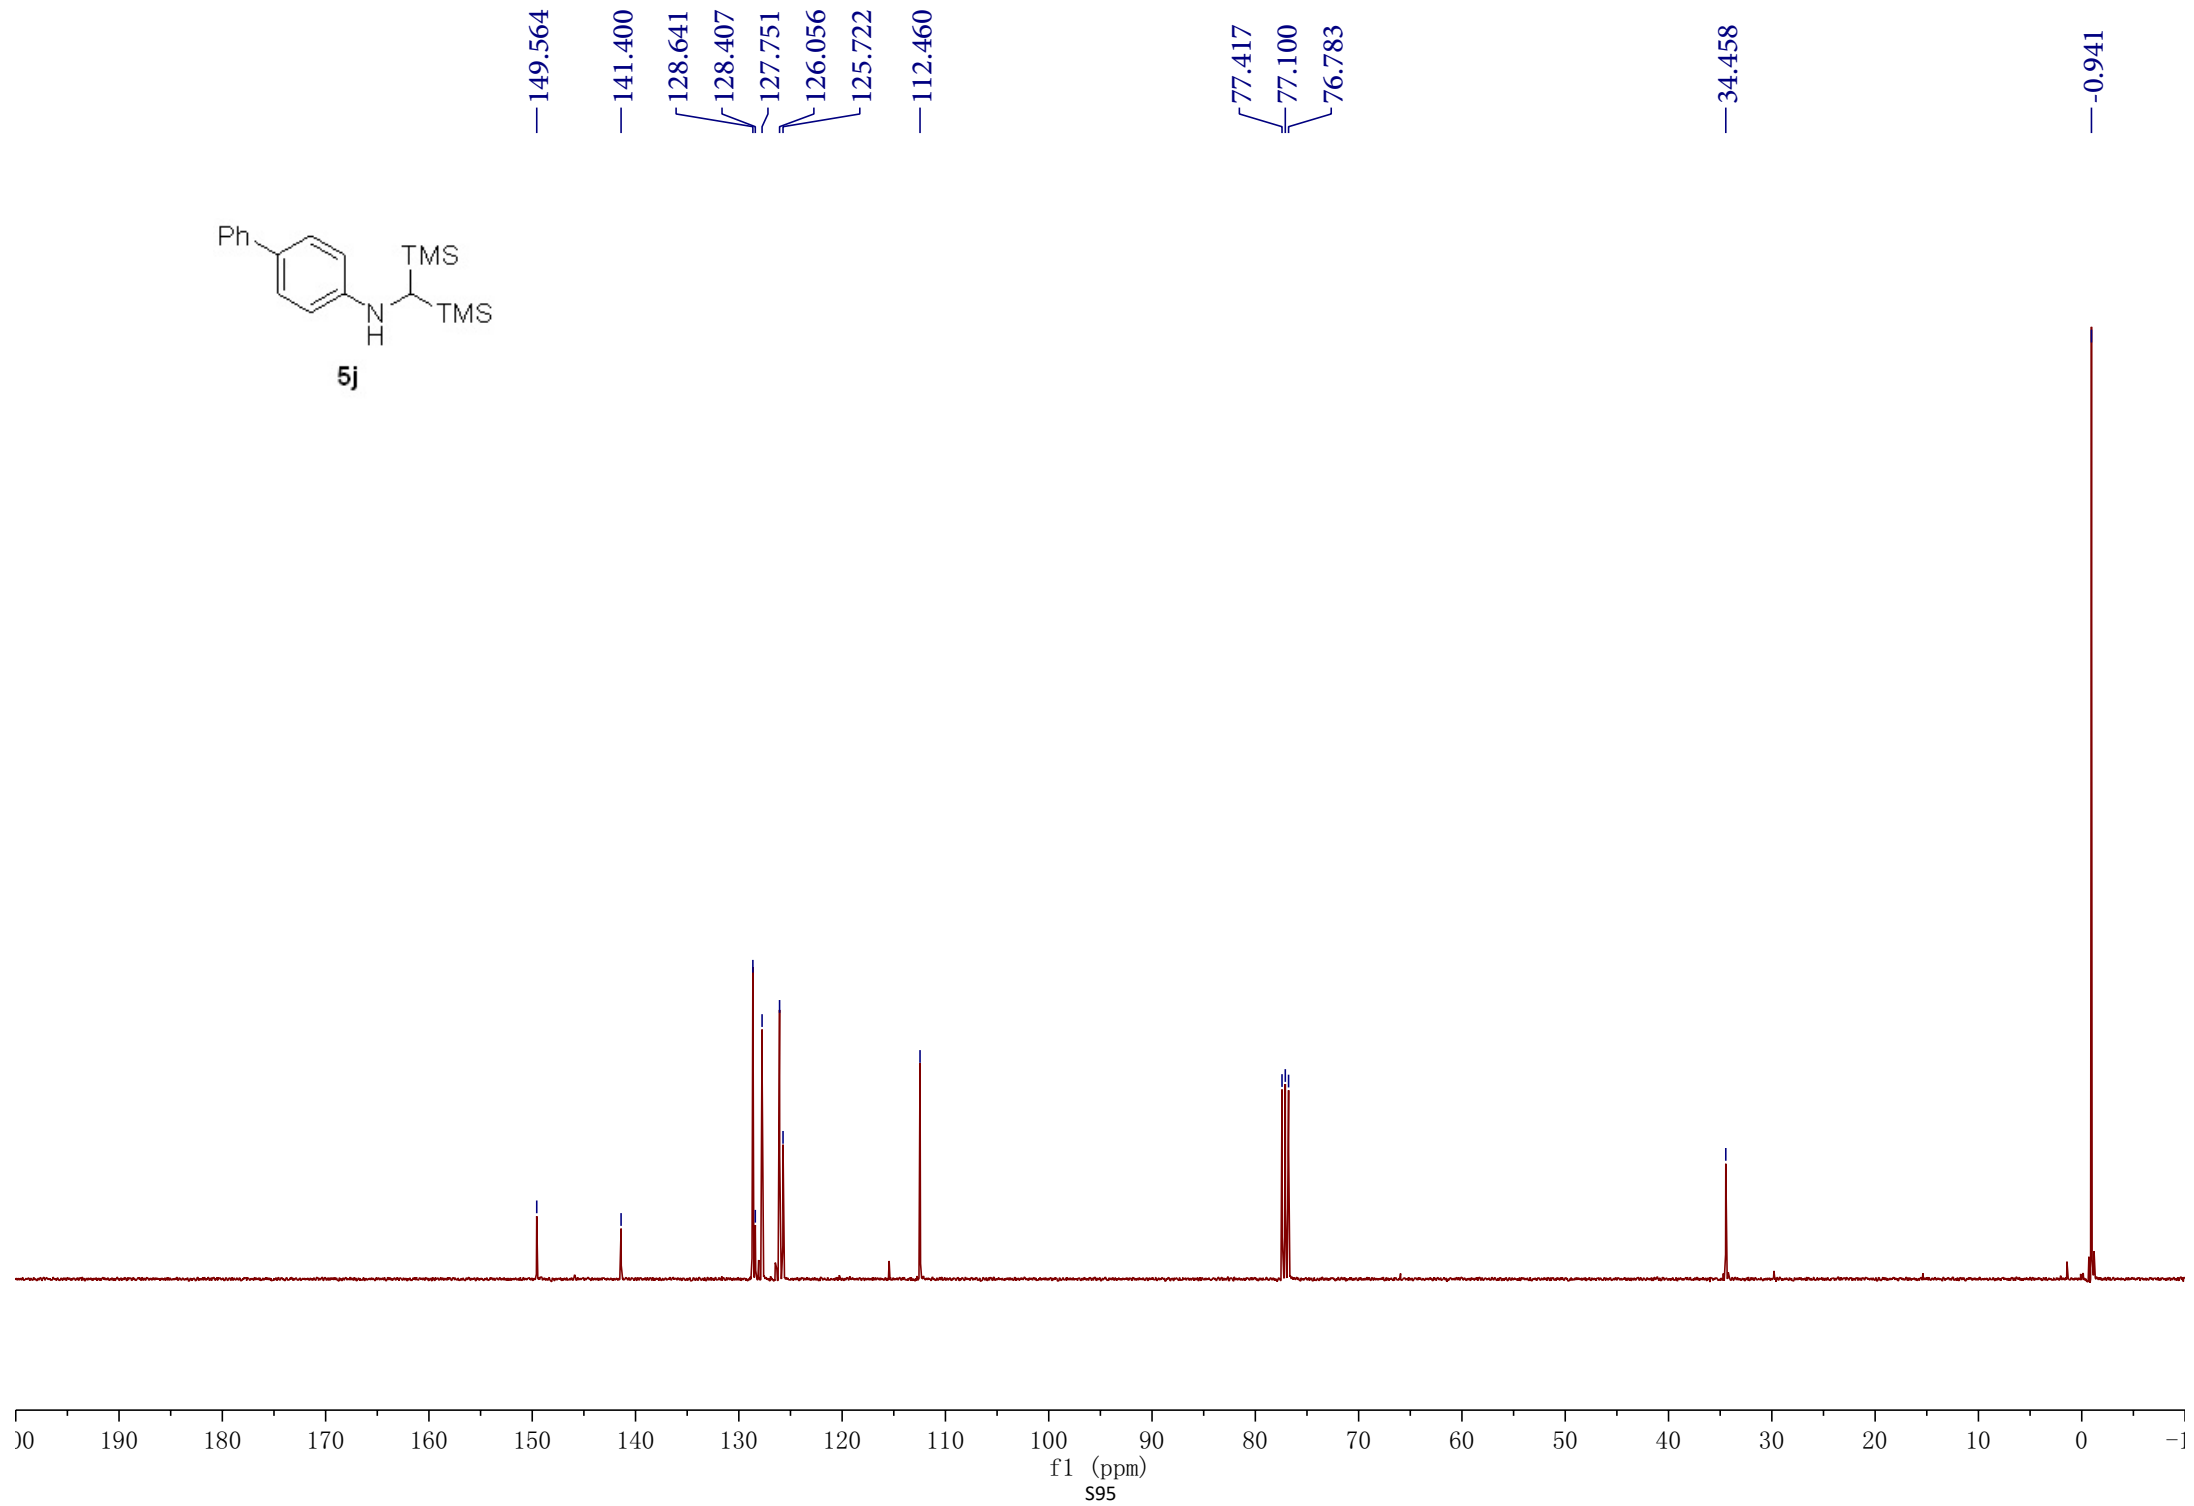

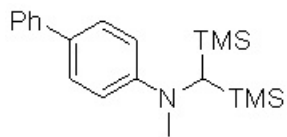

1j

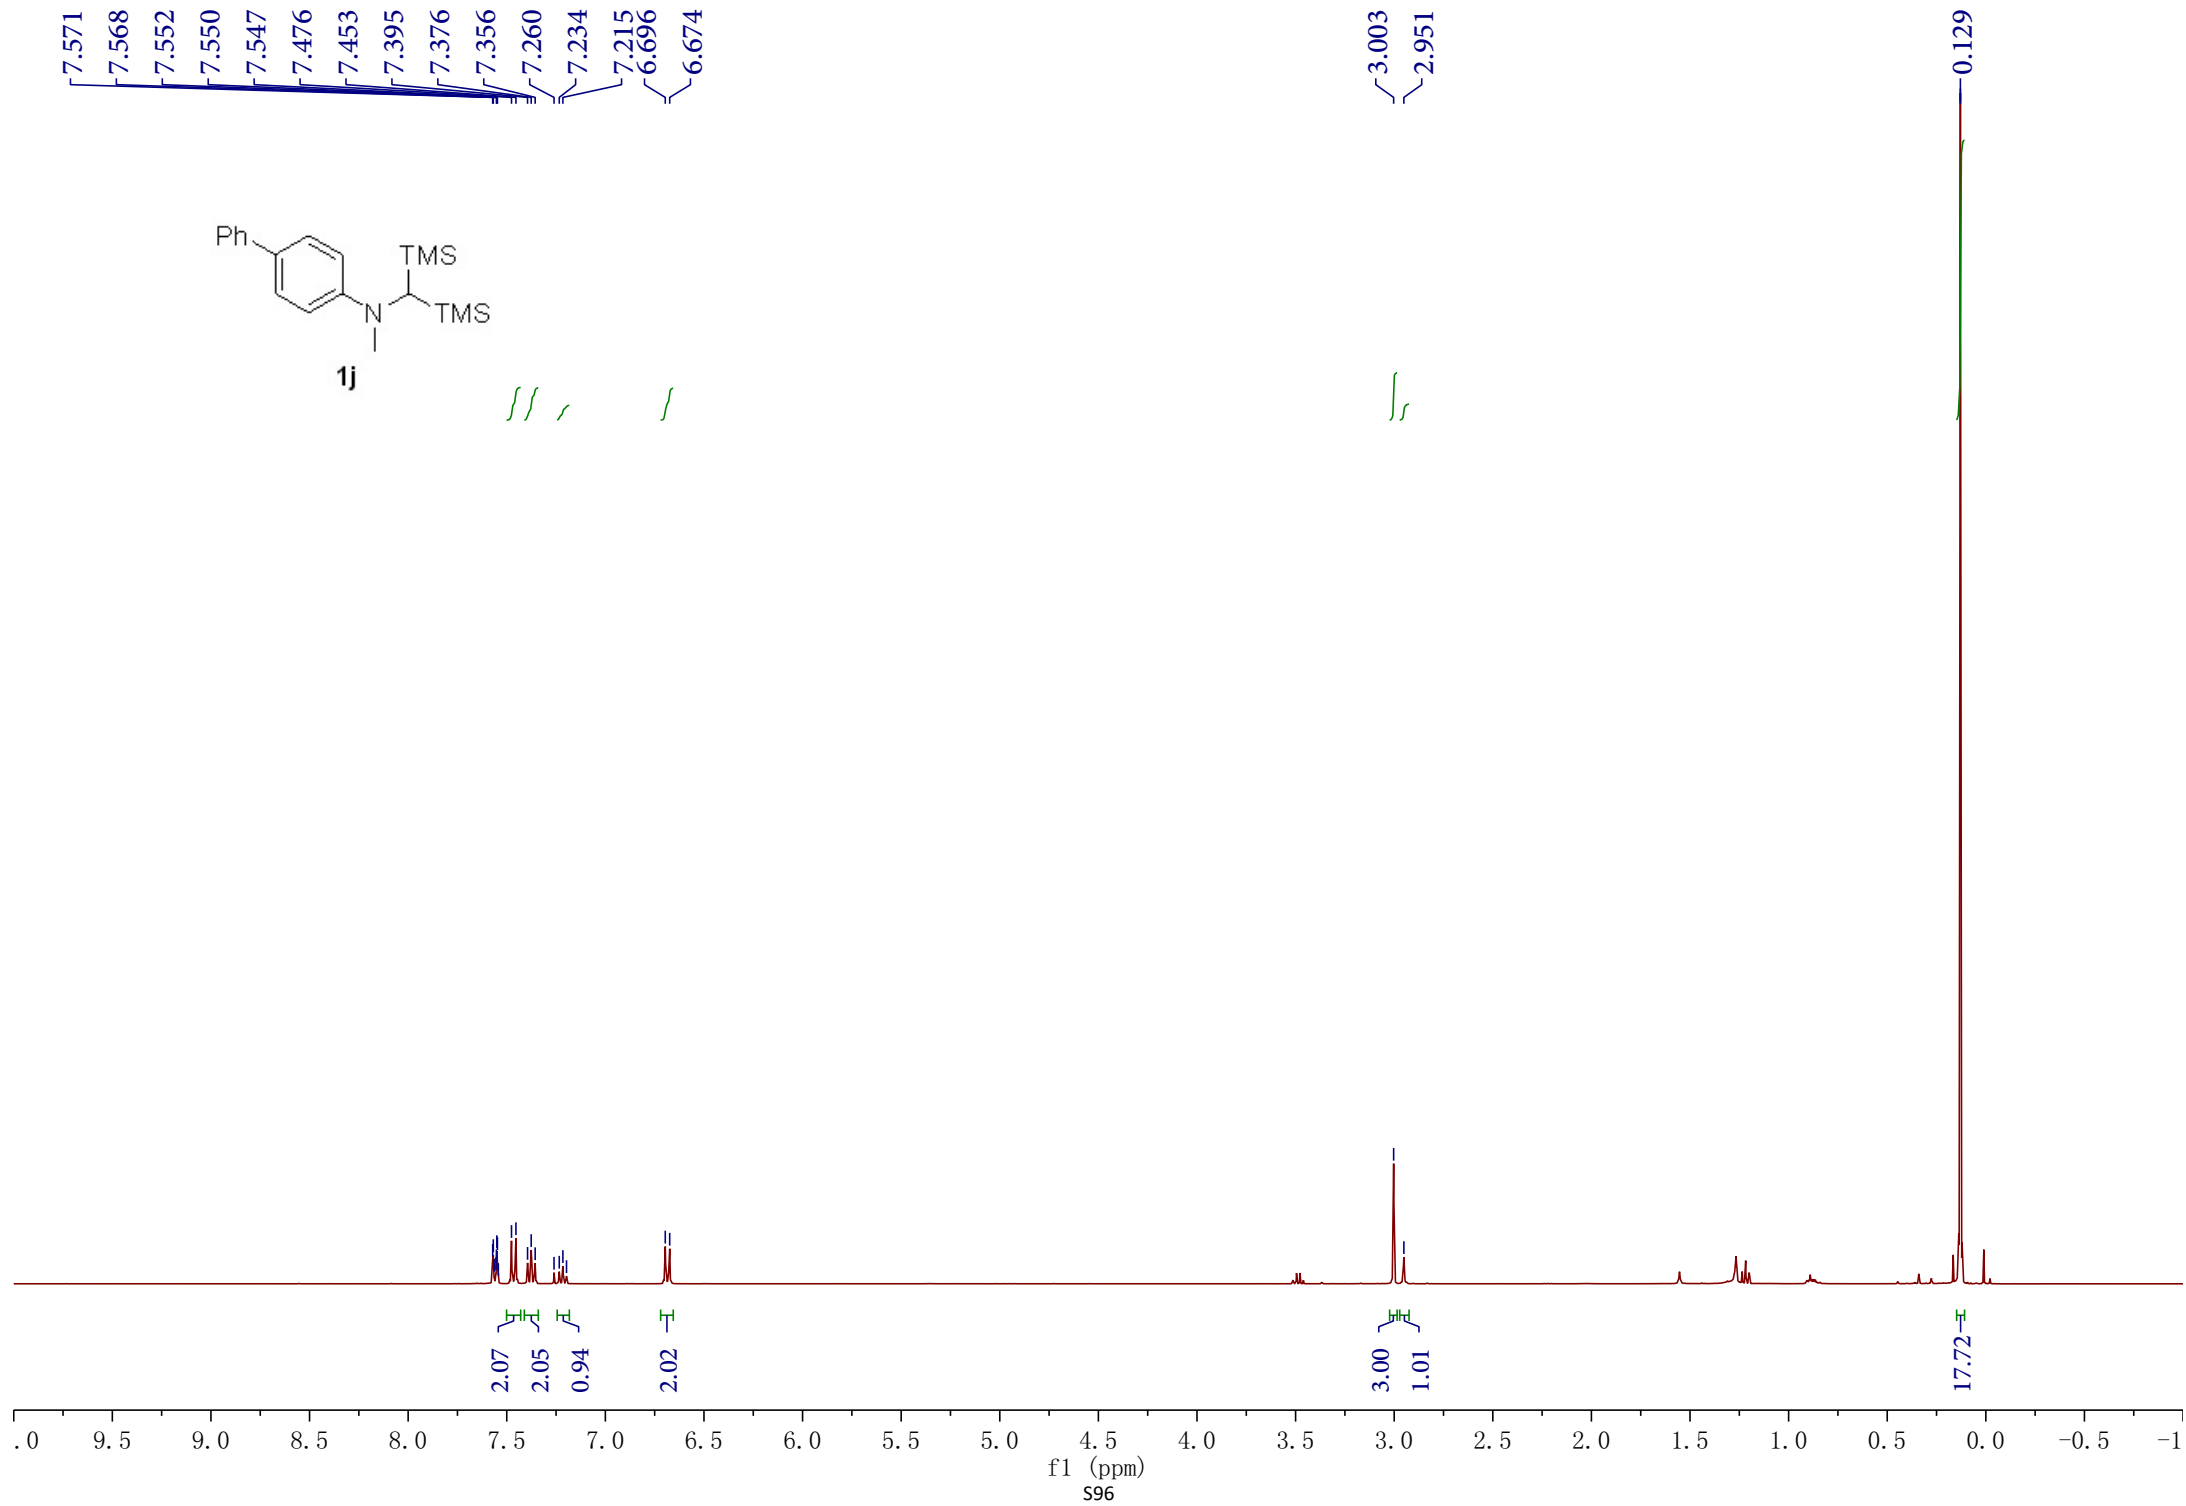



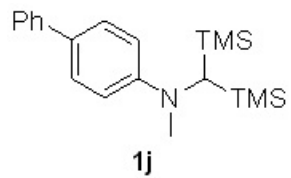

— 150.085  
 — 141.346  
 { 128.648  
 { 127.565  
 { 126.630  
 { 125.979  
 { 125.578  
 — 111.305  
 { 77.417  
 { 77.100  
 { 76.783  
 — 43.748  
 — 39.074  
 — 0.619

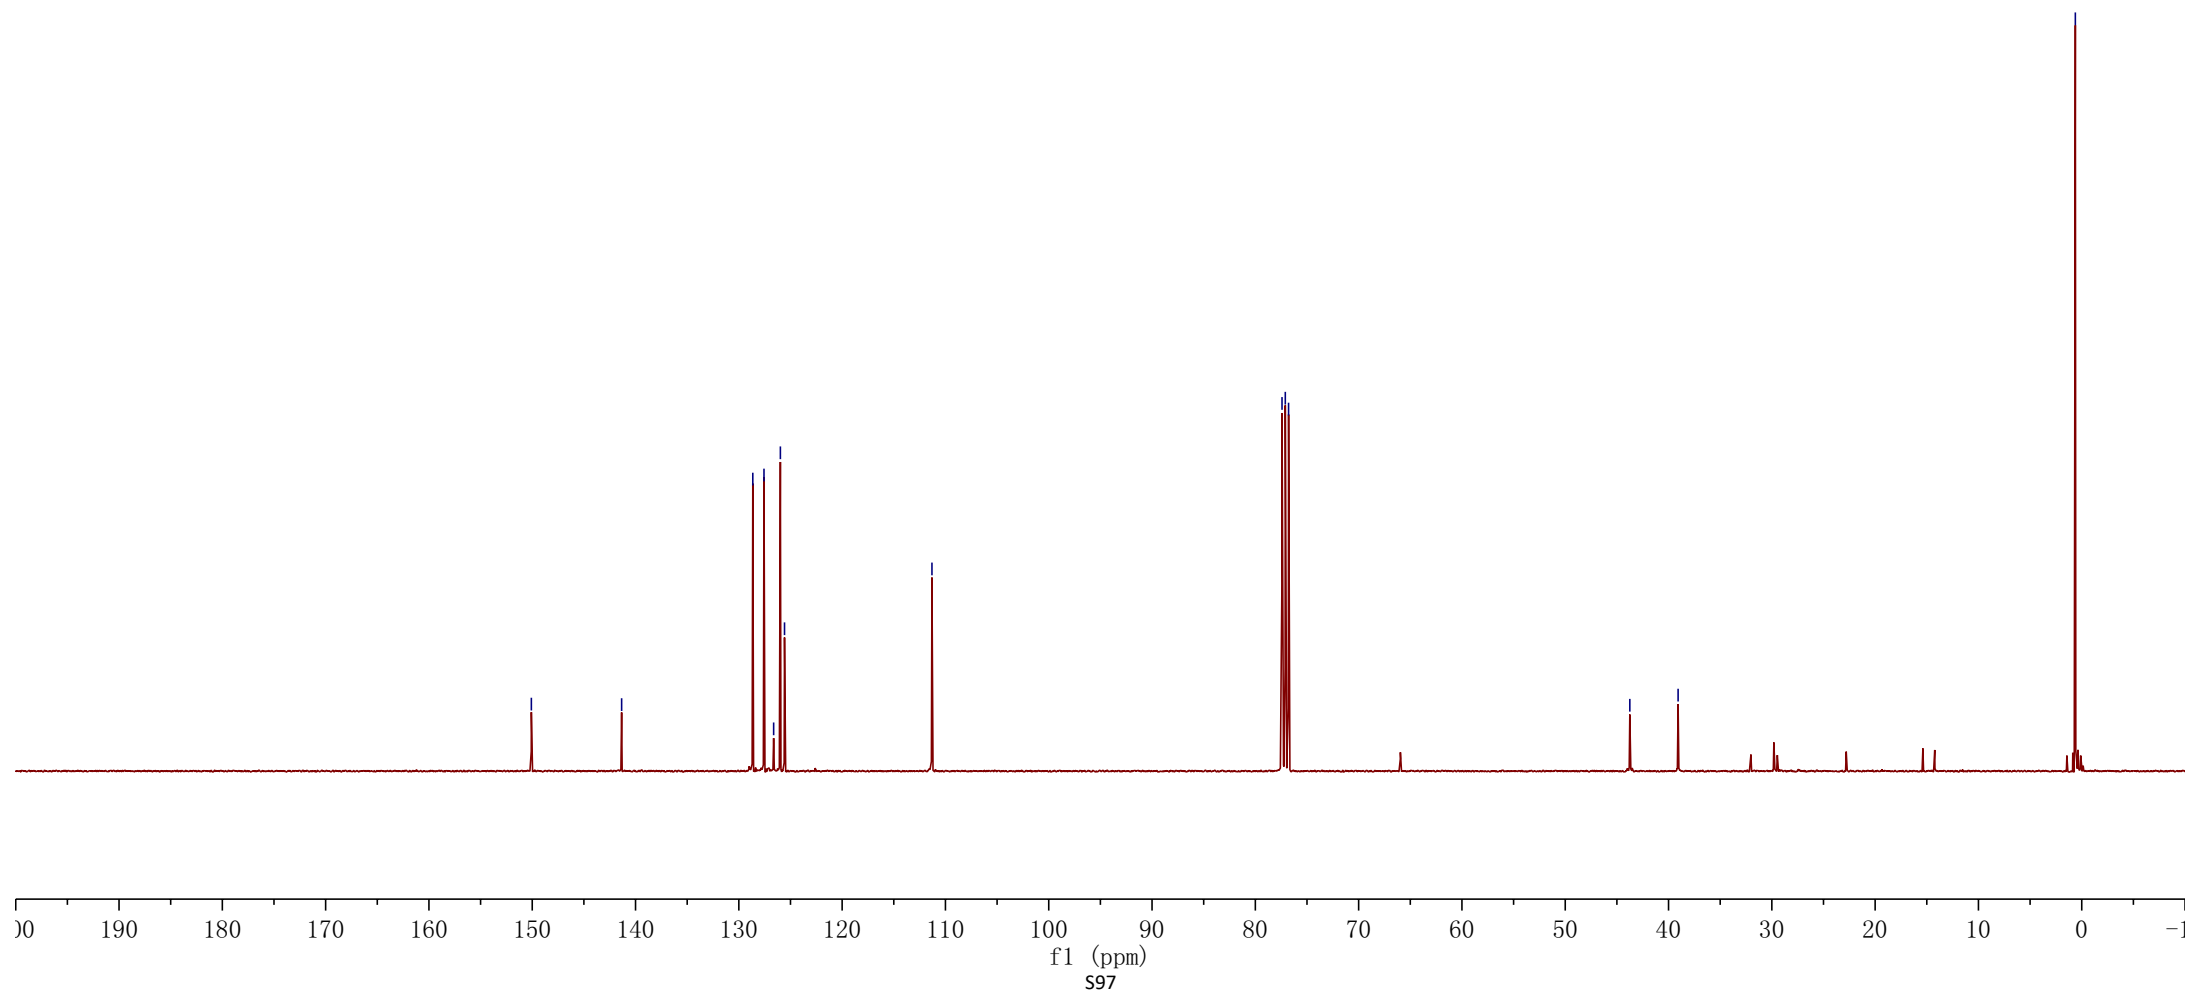

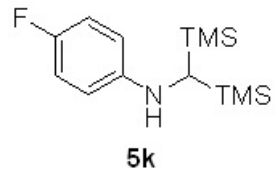

7.260  
6.852  
6.830  
6.808  
6.470  
6.459  
6.447  
6.437

3.195  
3.173

2.322  
2.300

-0.065

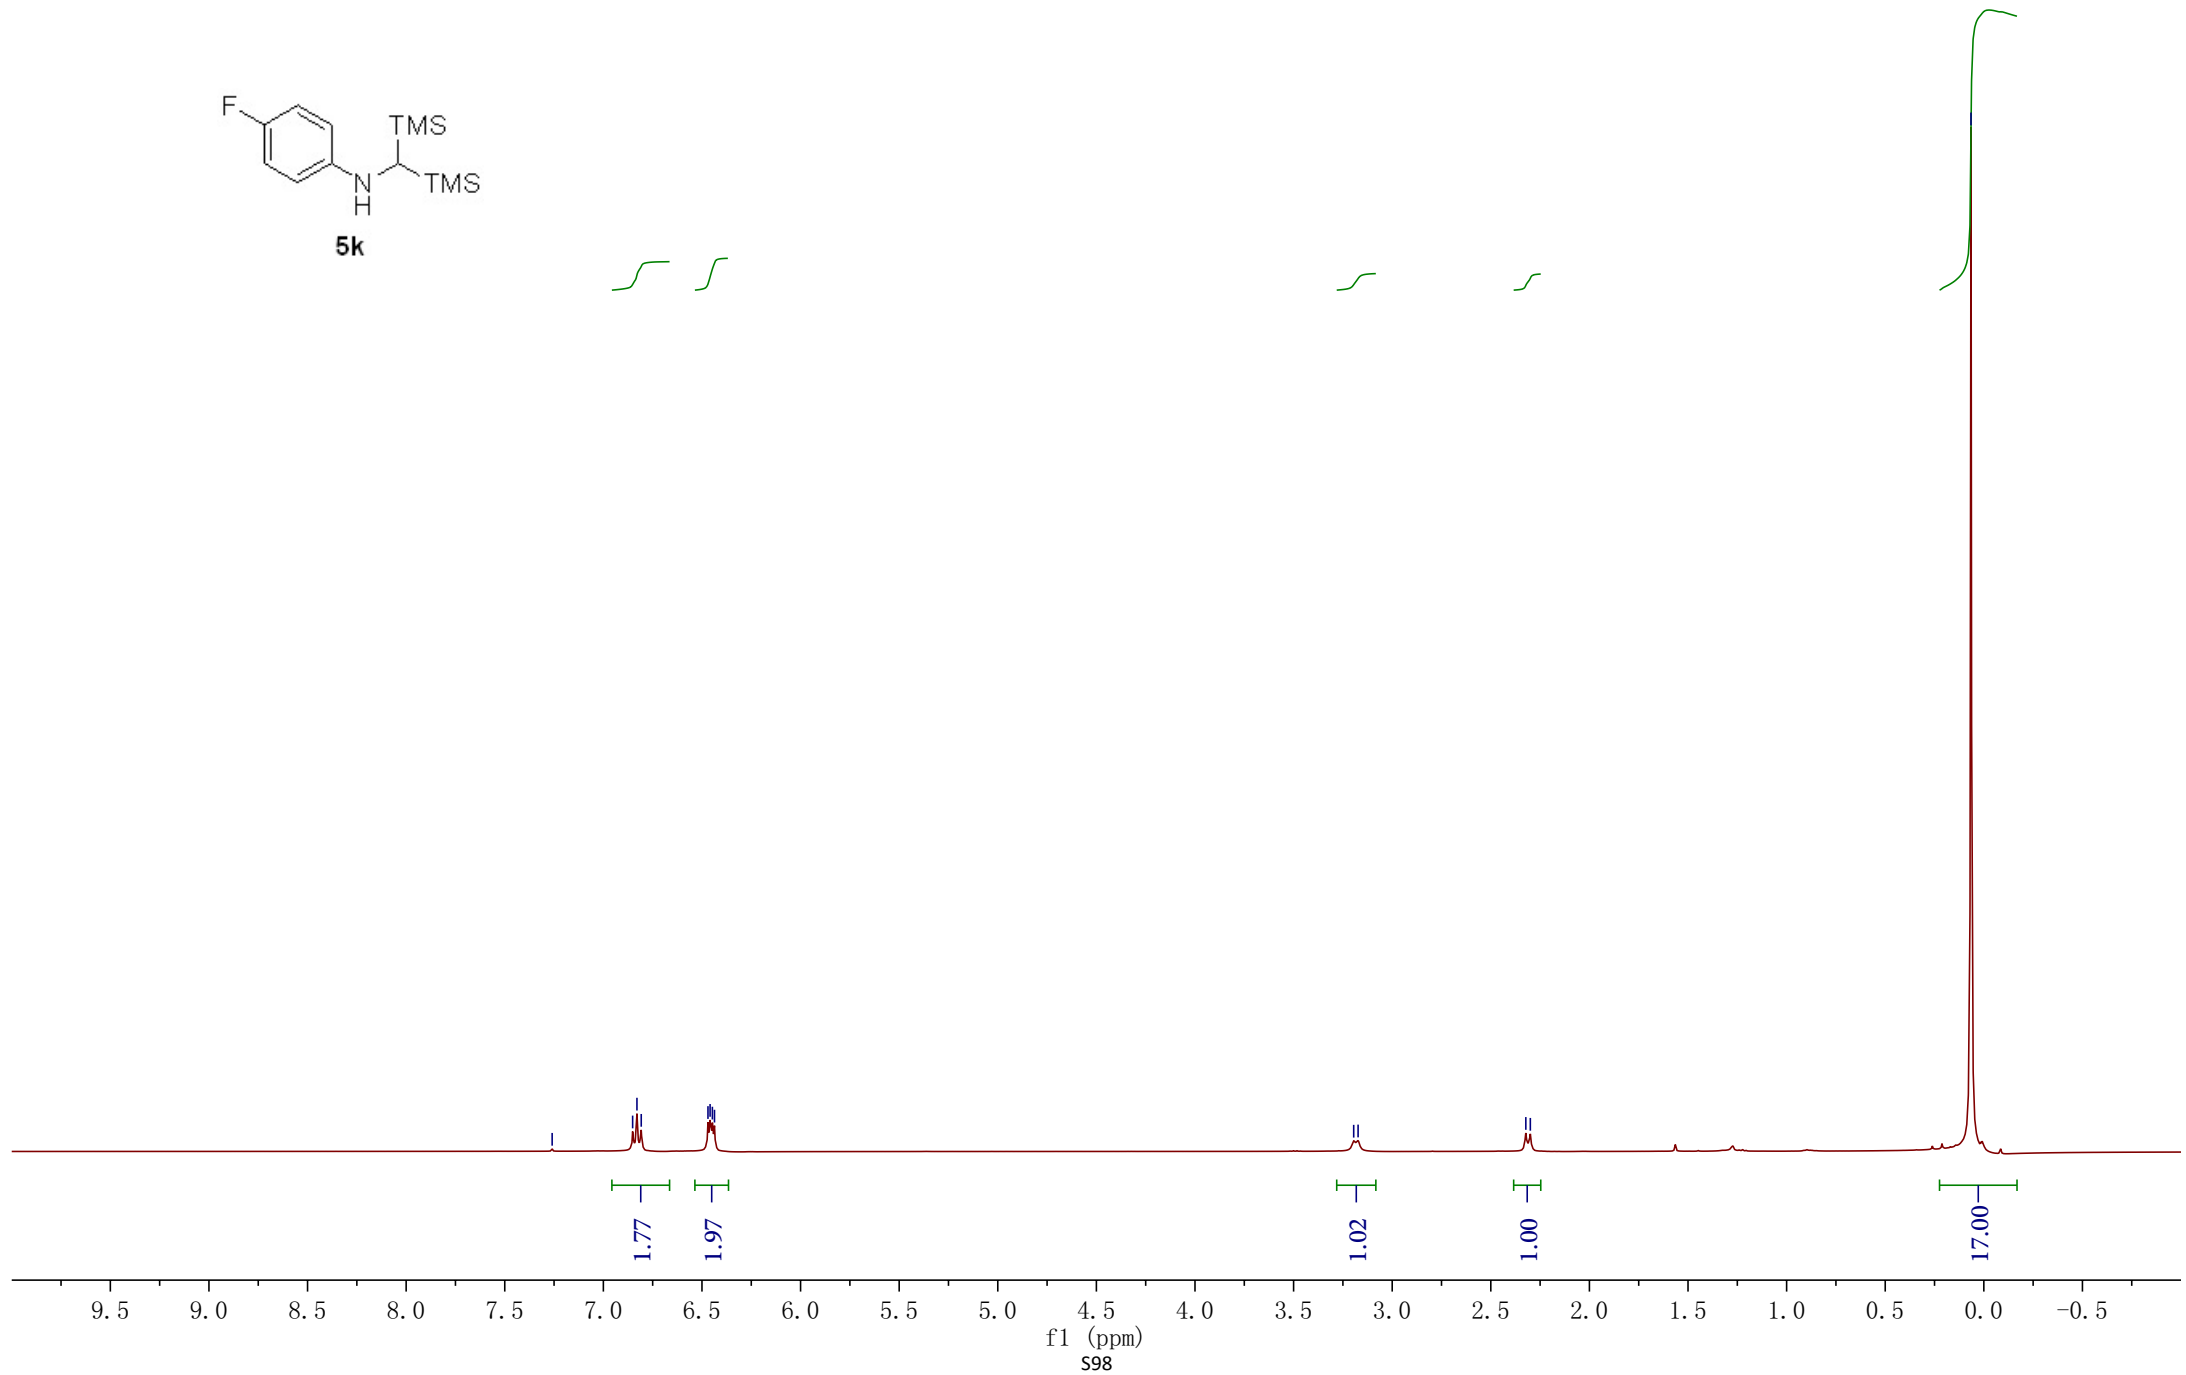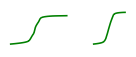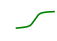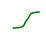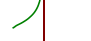

1.77

1.97

1.02

1.00

17.00

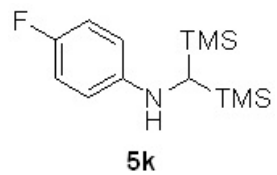

155.549  
154.003  
146.719

115.551  
115.404  
112.769  
112.721

77.311  
77.100  
76.887

35.213

-0.970

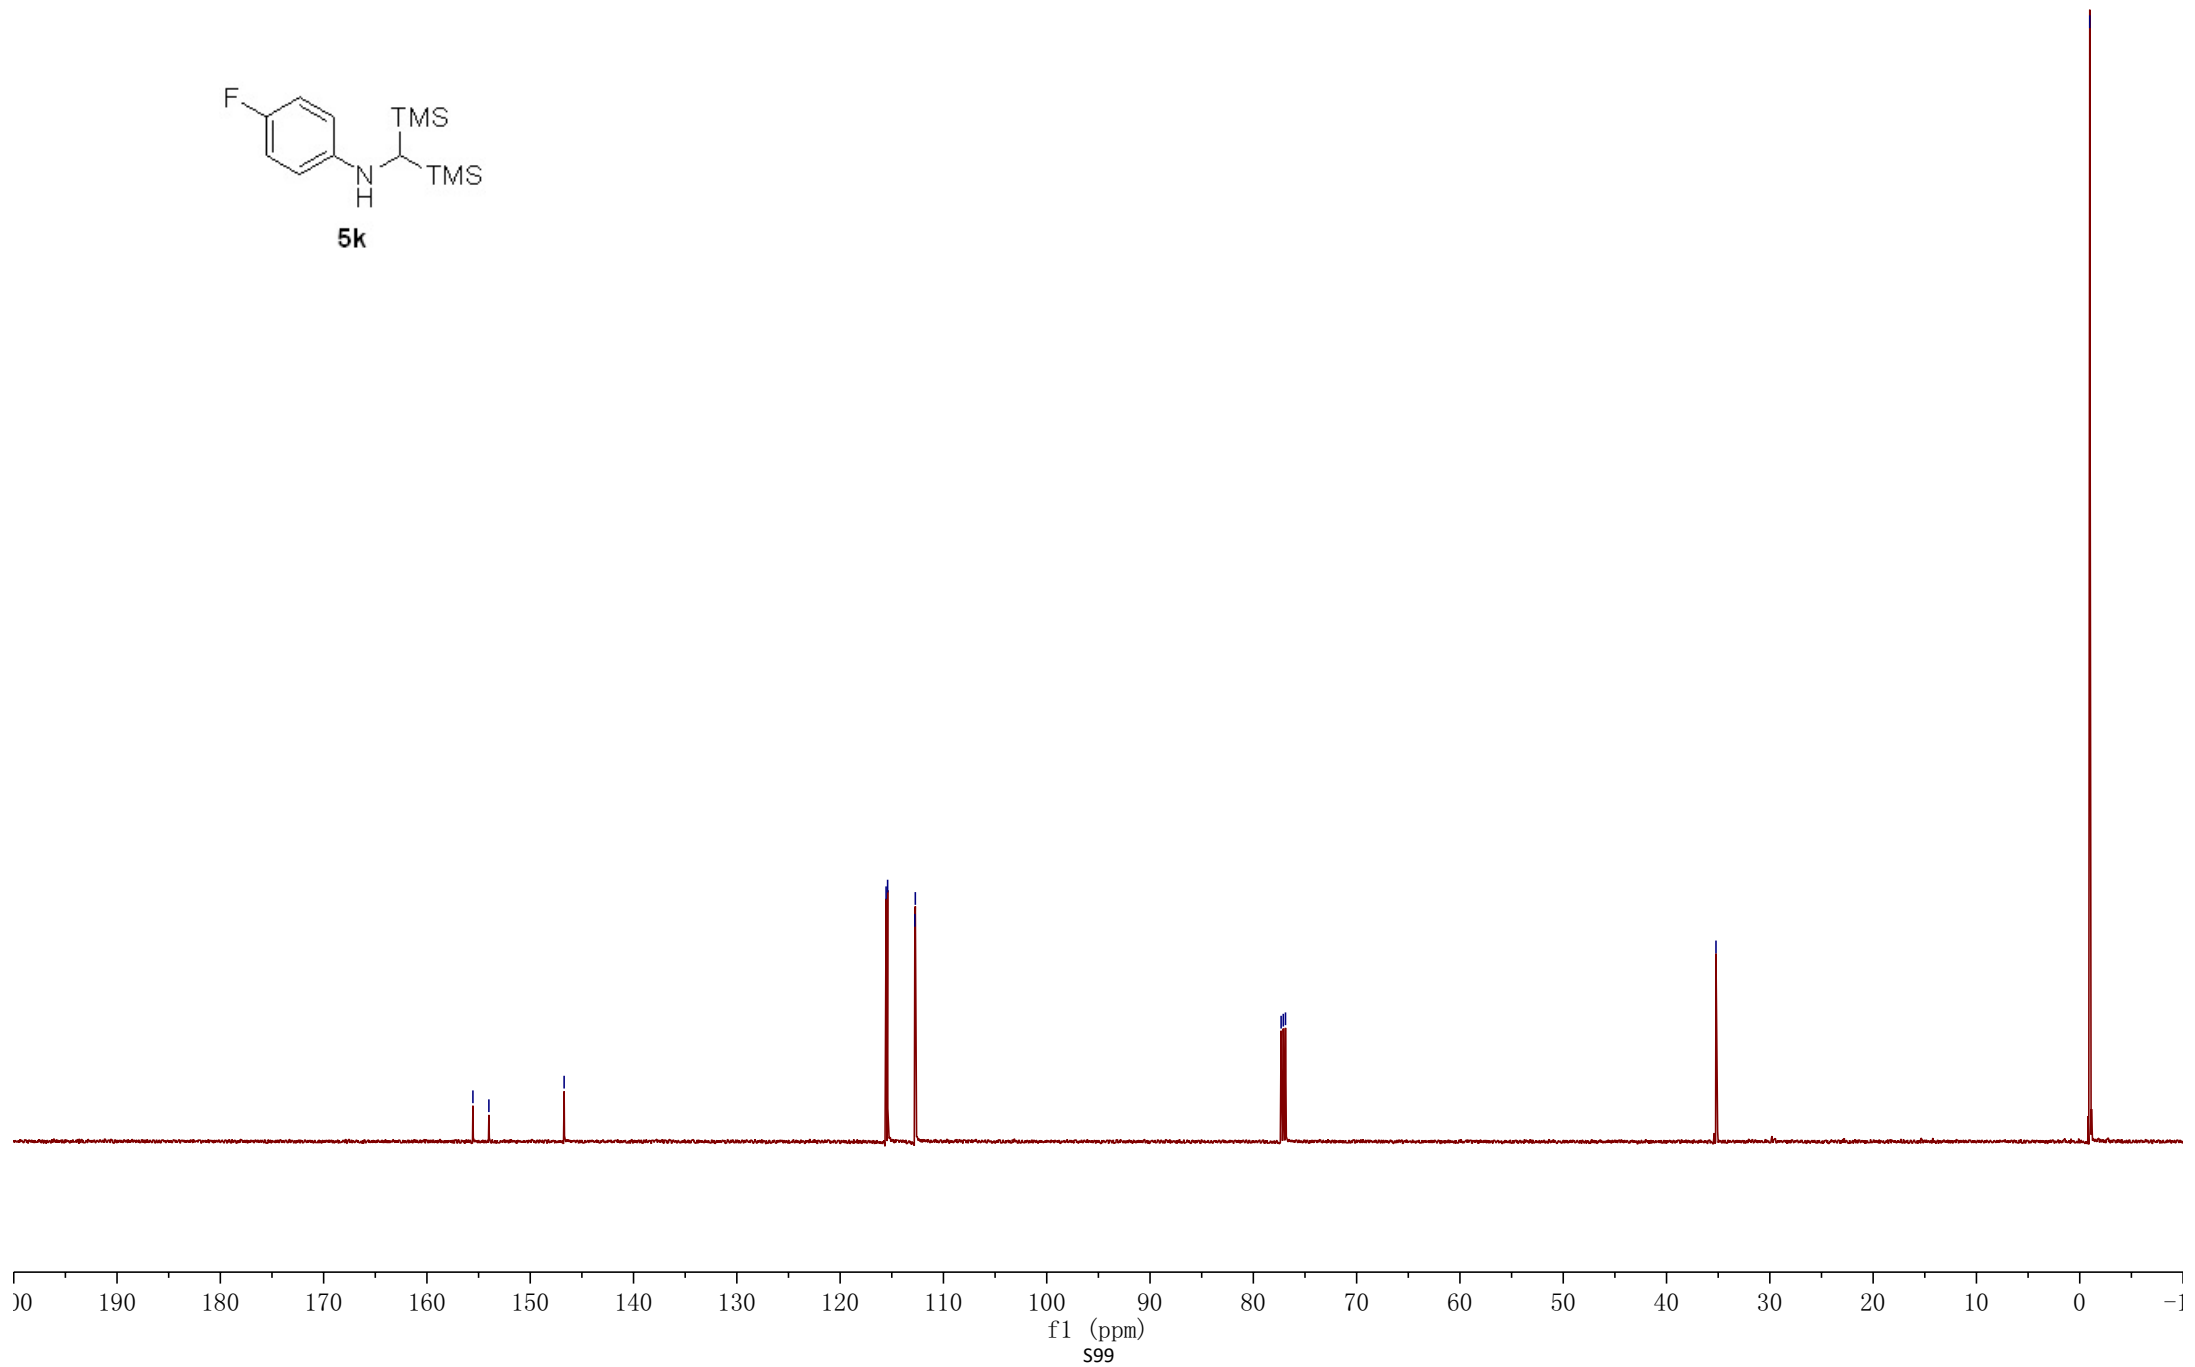

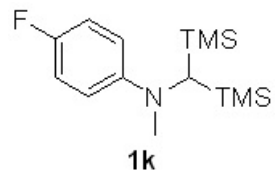

7.260  
6.909  
6.886  
6.864  
6.533  
6.523  
6.510  
6.500

2.925  
2.808

-0.099

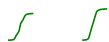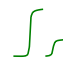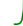

1.71

2.00

3.00

1.05

17.93

9.5 9.0 8.5 8.0 7.5 7.0 6.5 6.0 5.5 5.0 4.5 4.0 3.5 3.0 2.5 2.0 1.5 1.0 0.5 0.0 -0.5 -1

f1 (ppm)  
S100

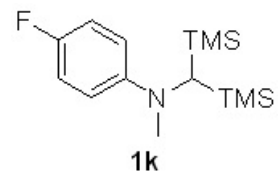

155.127  
152.817  
147.661  
147.648

115.393  
115.176  
111.567  
111.496

77.417  
77.100  
76.782

44.308  
39.236

0.614

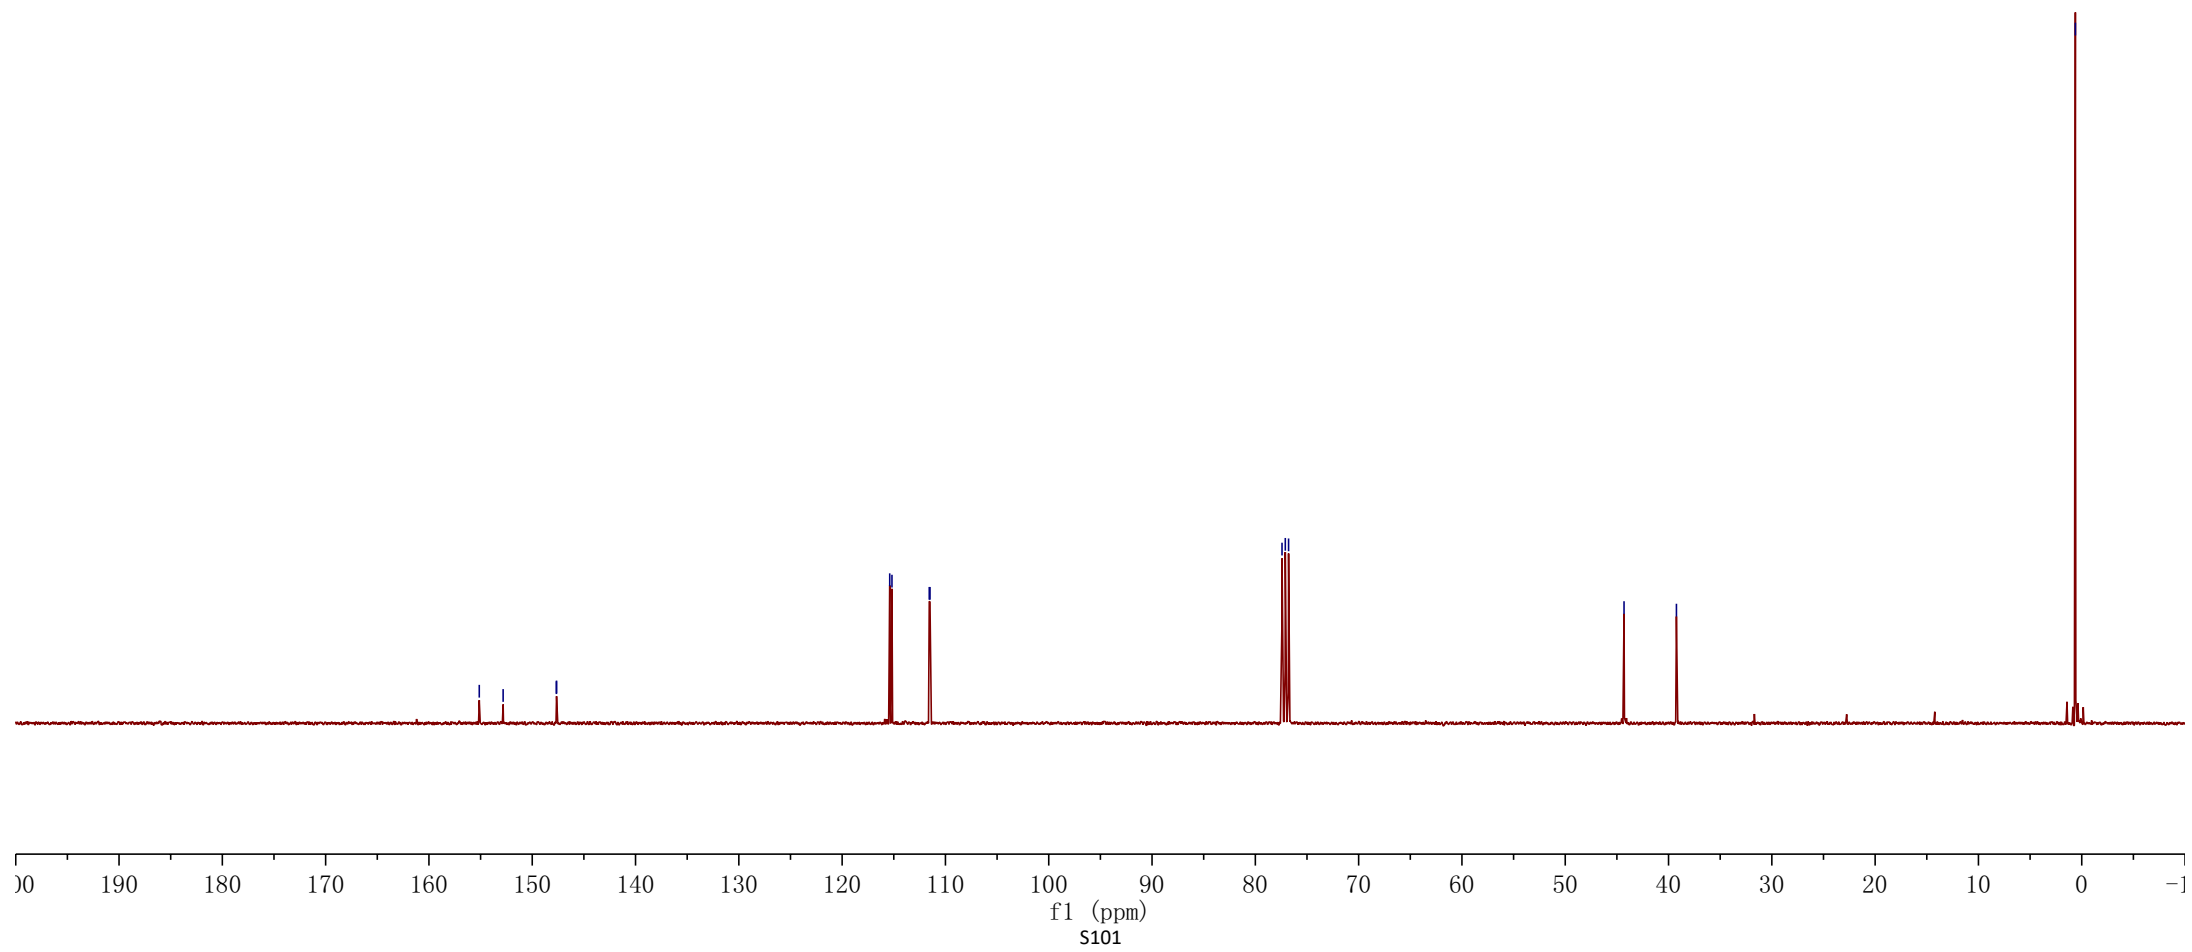

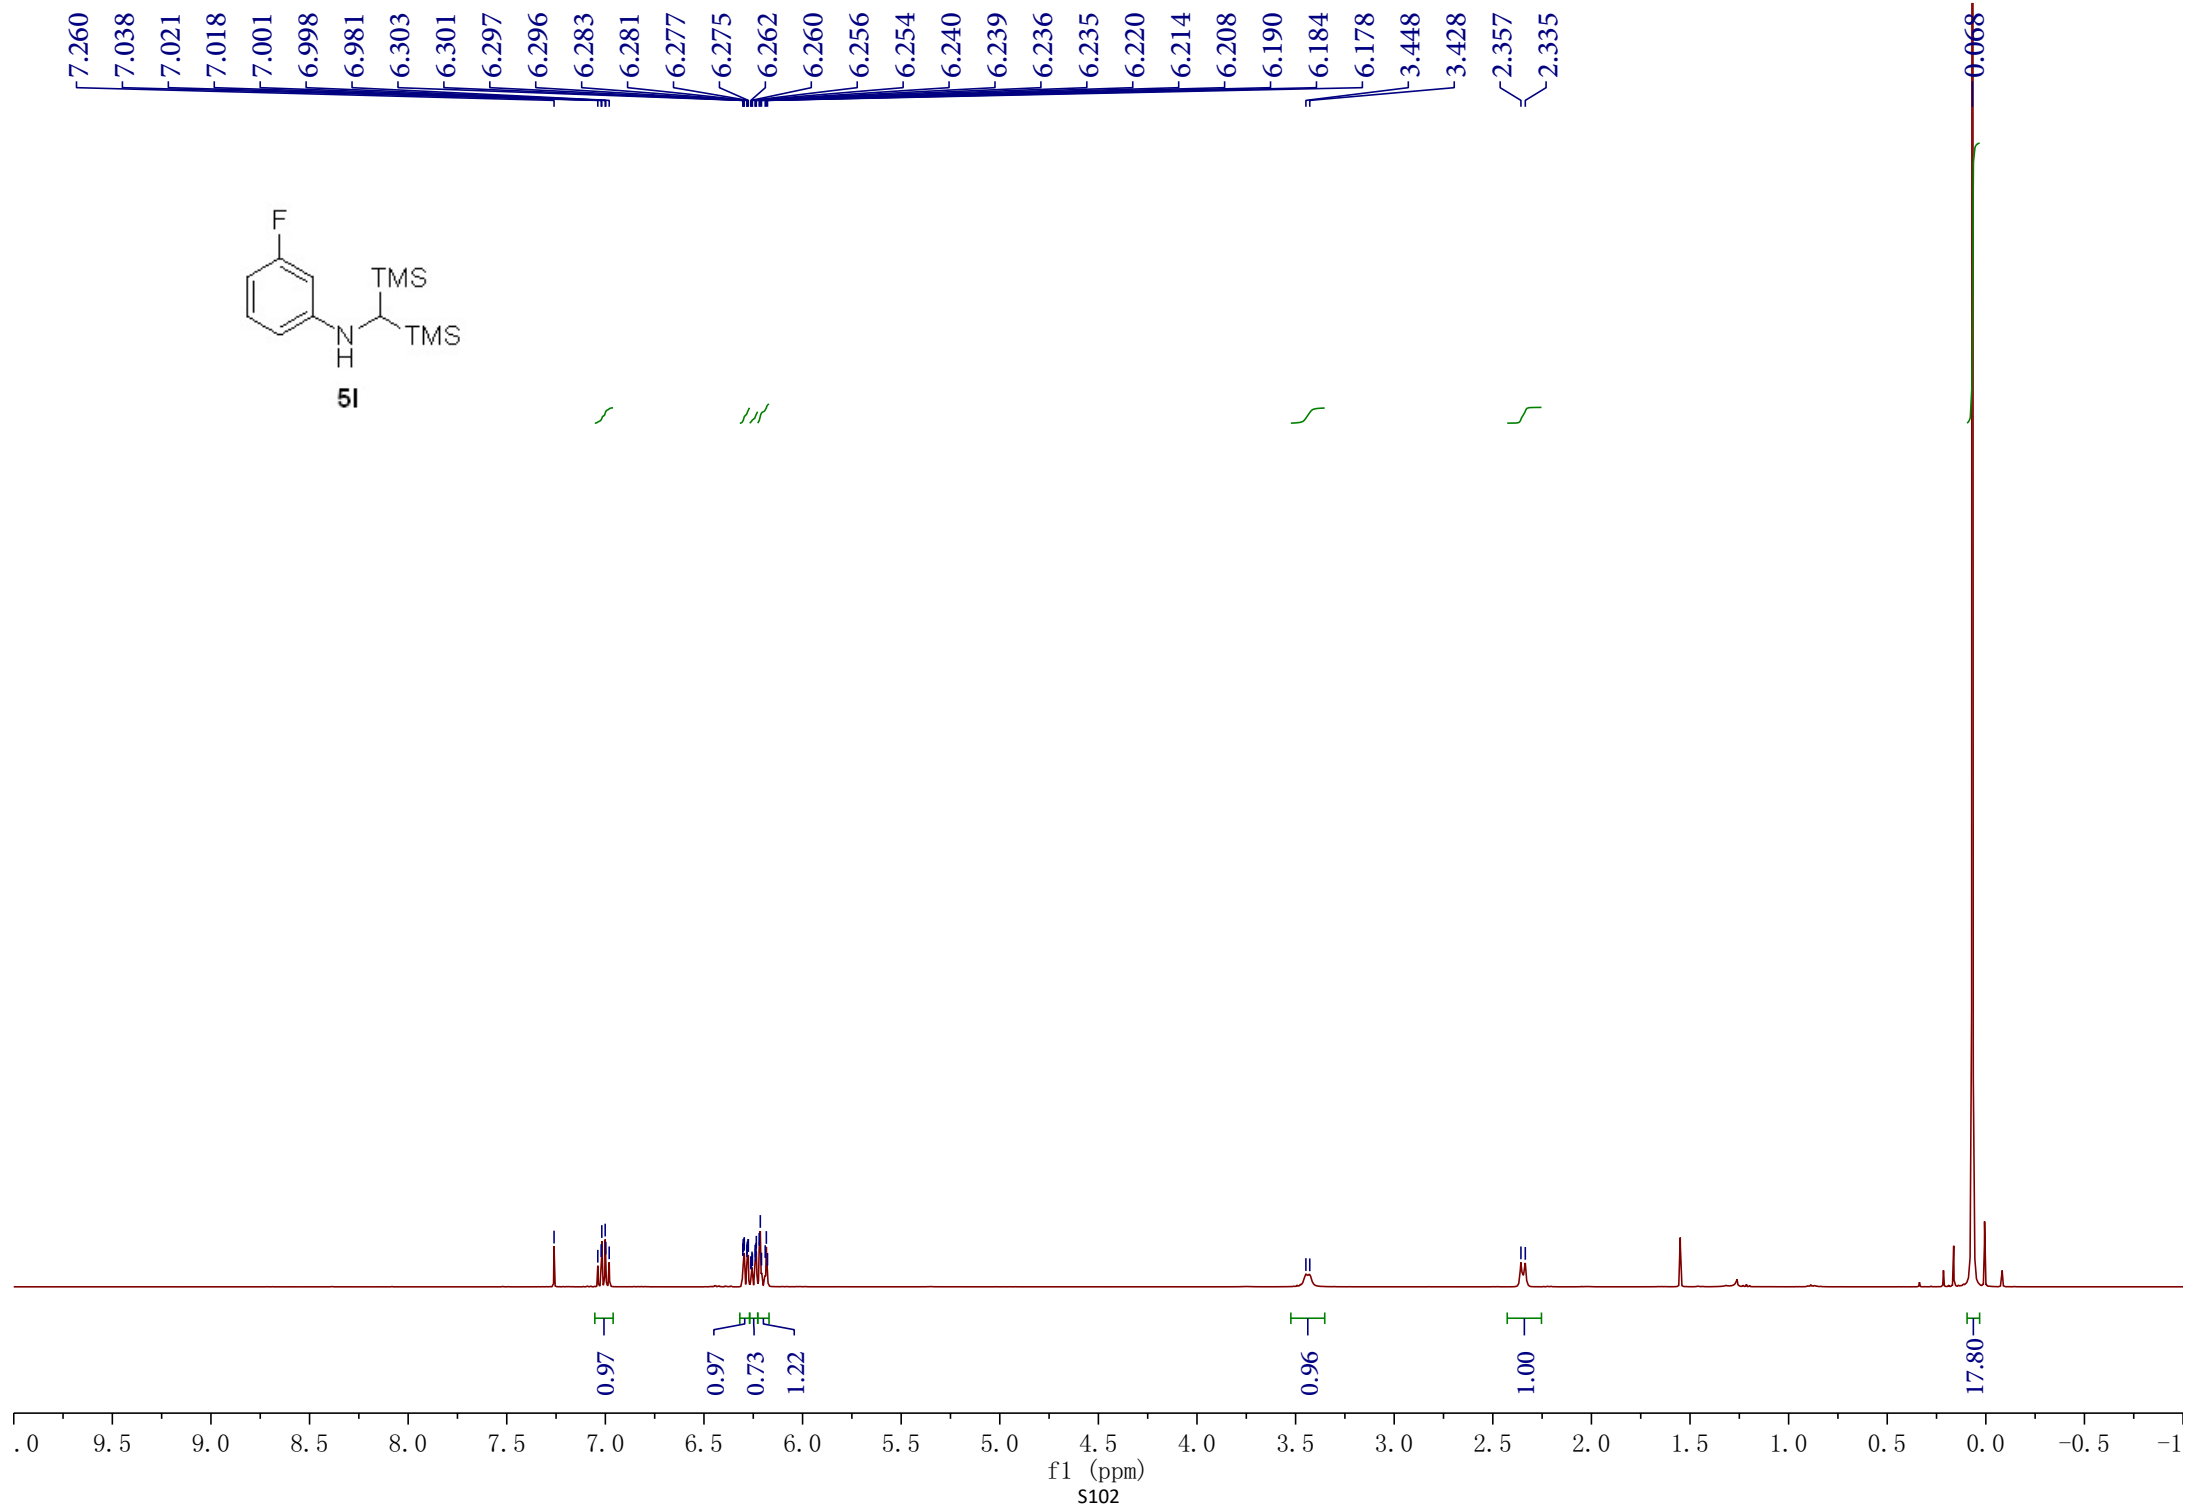

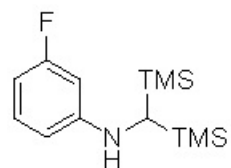**5I**

165.579  
163.177  
151.965  
151.857

130.075  
129.970

108.374  
108.354  
102.111  
101.895  
98.567  
98.312

77.418  
77.101  
76.783

34.661

-1.041

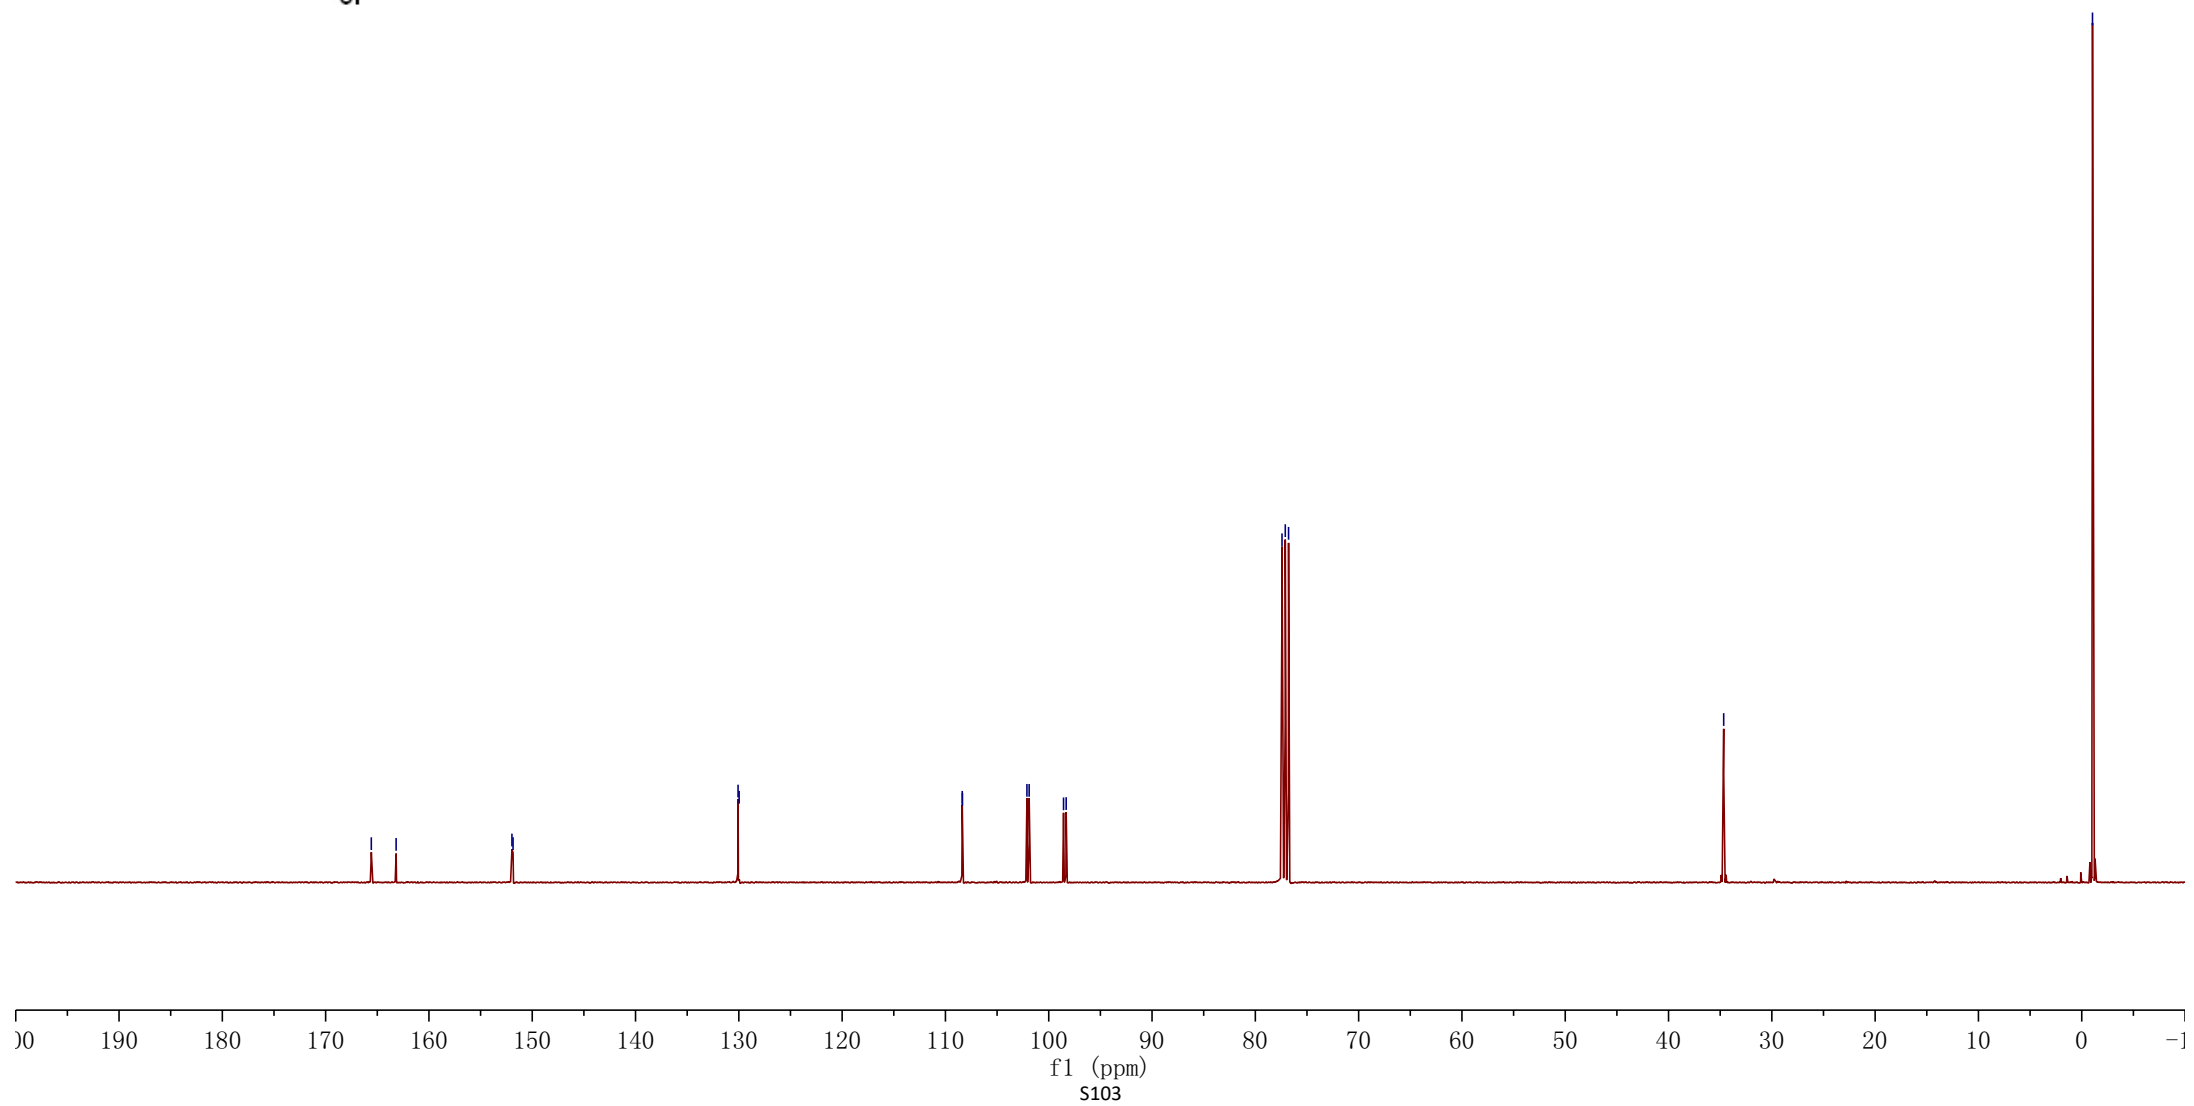

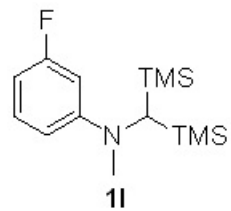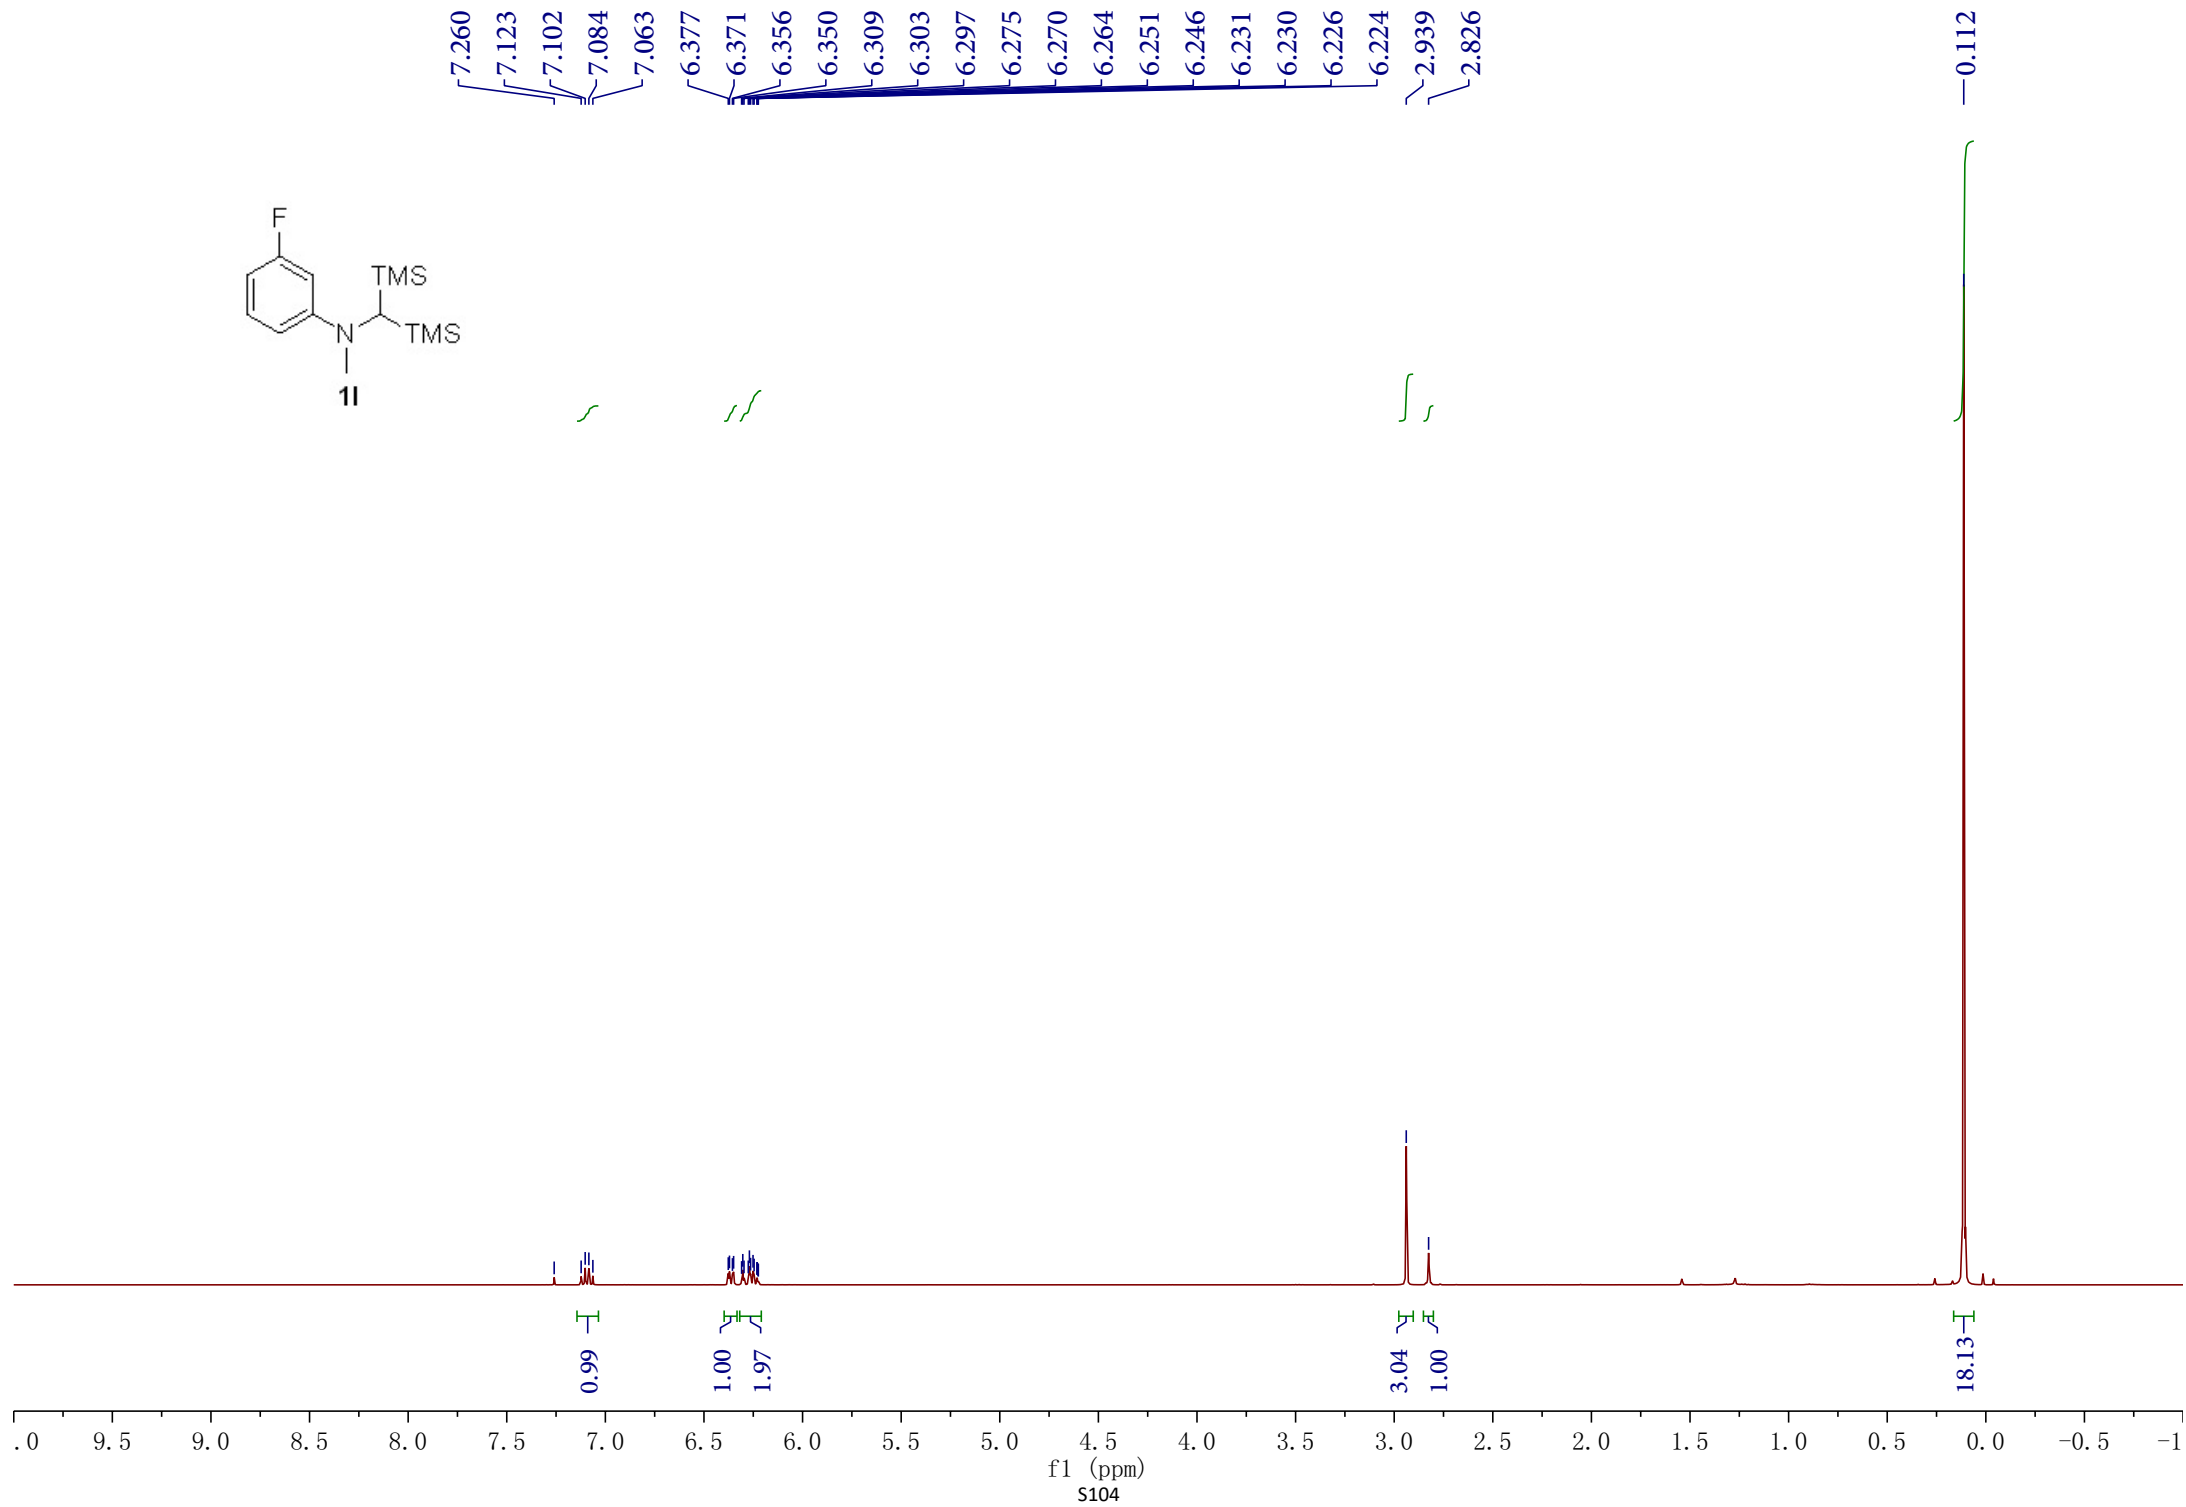



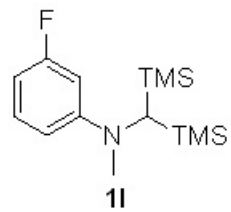

165.561

163.171

152.388

152.281

129.943

129.837

106.741

106.721

100.660

100.443

97.917

97.655

77.418

77.100

76.783

43.993

39.049

0.496

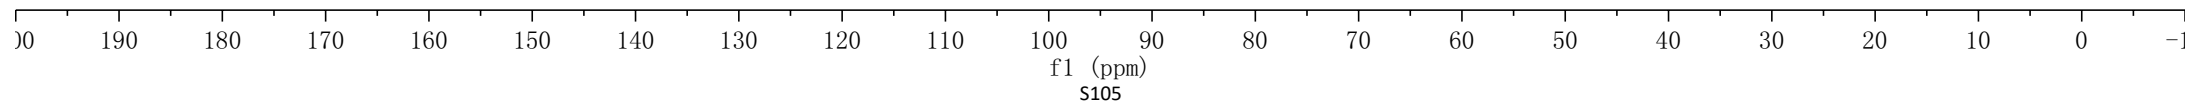

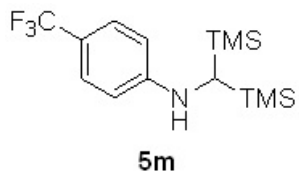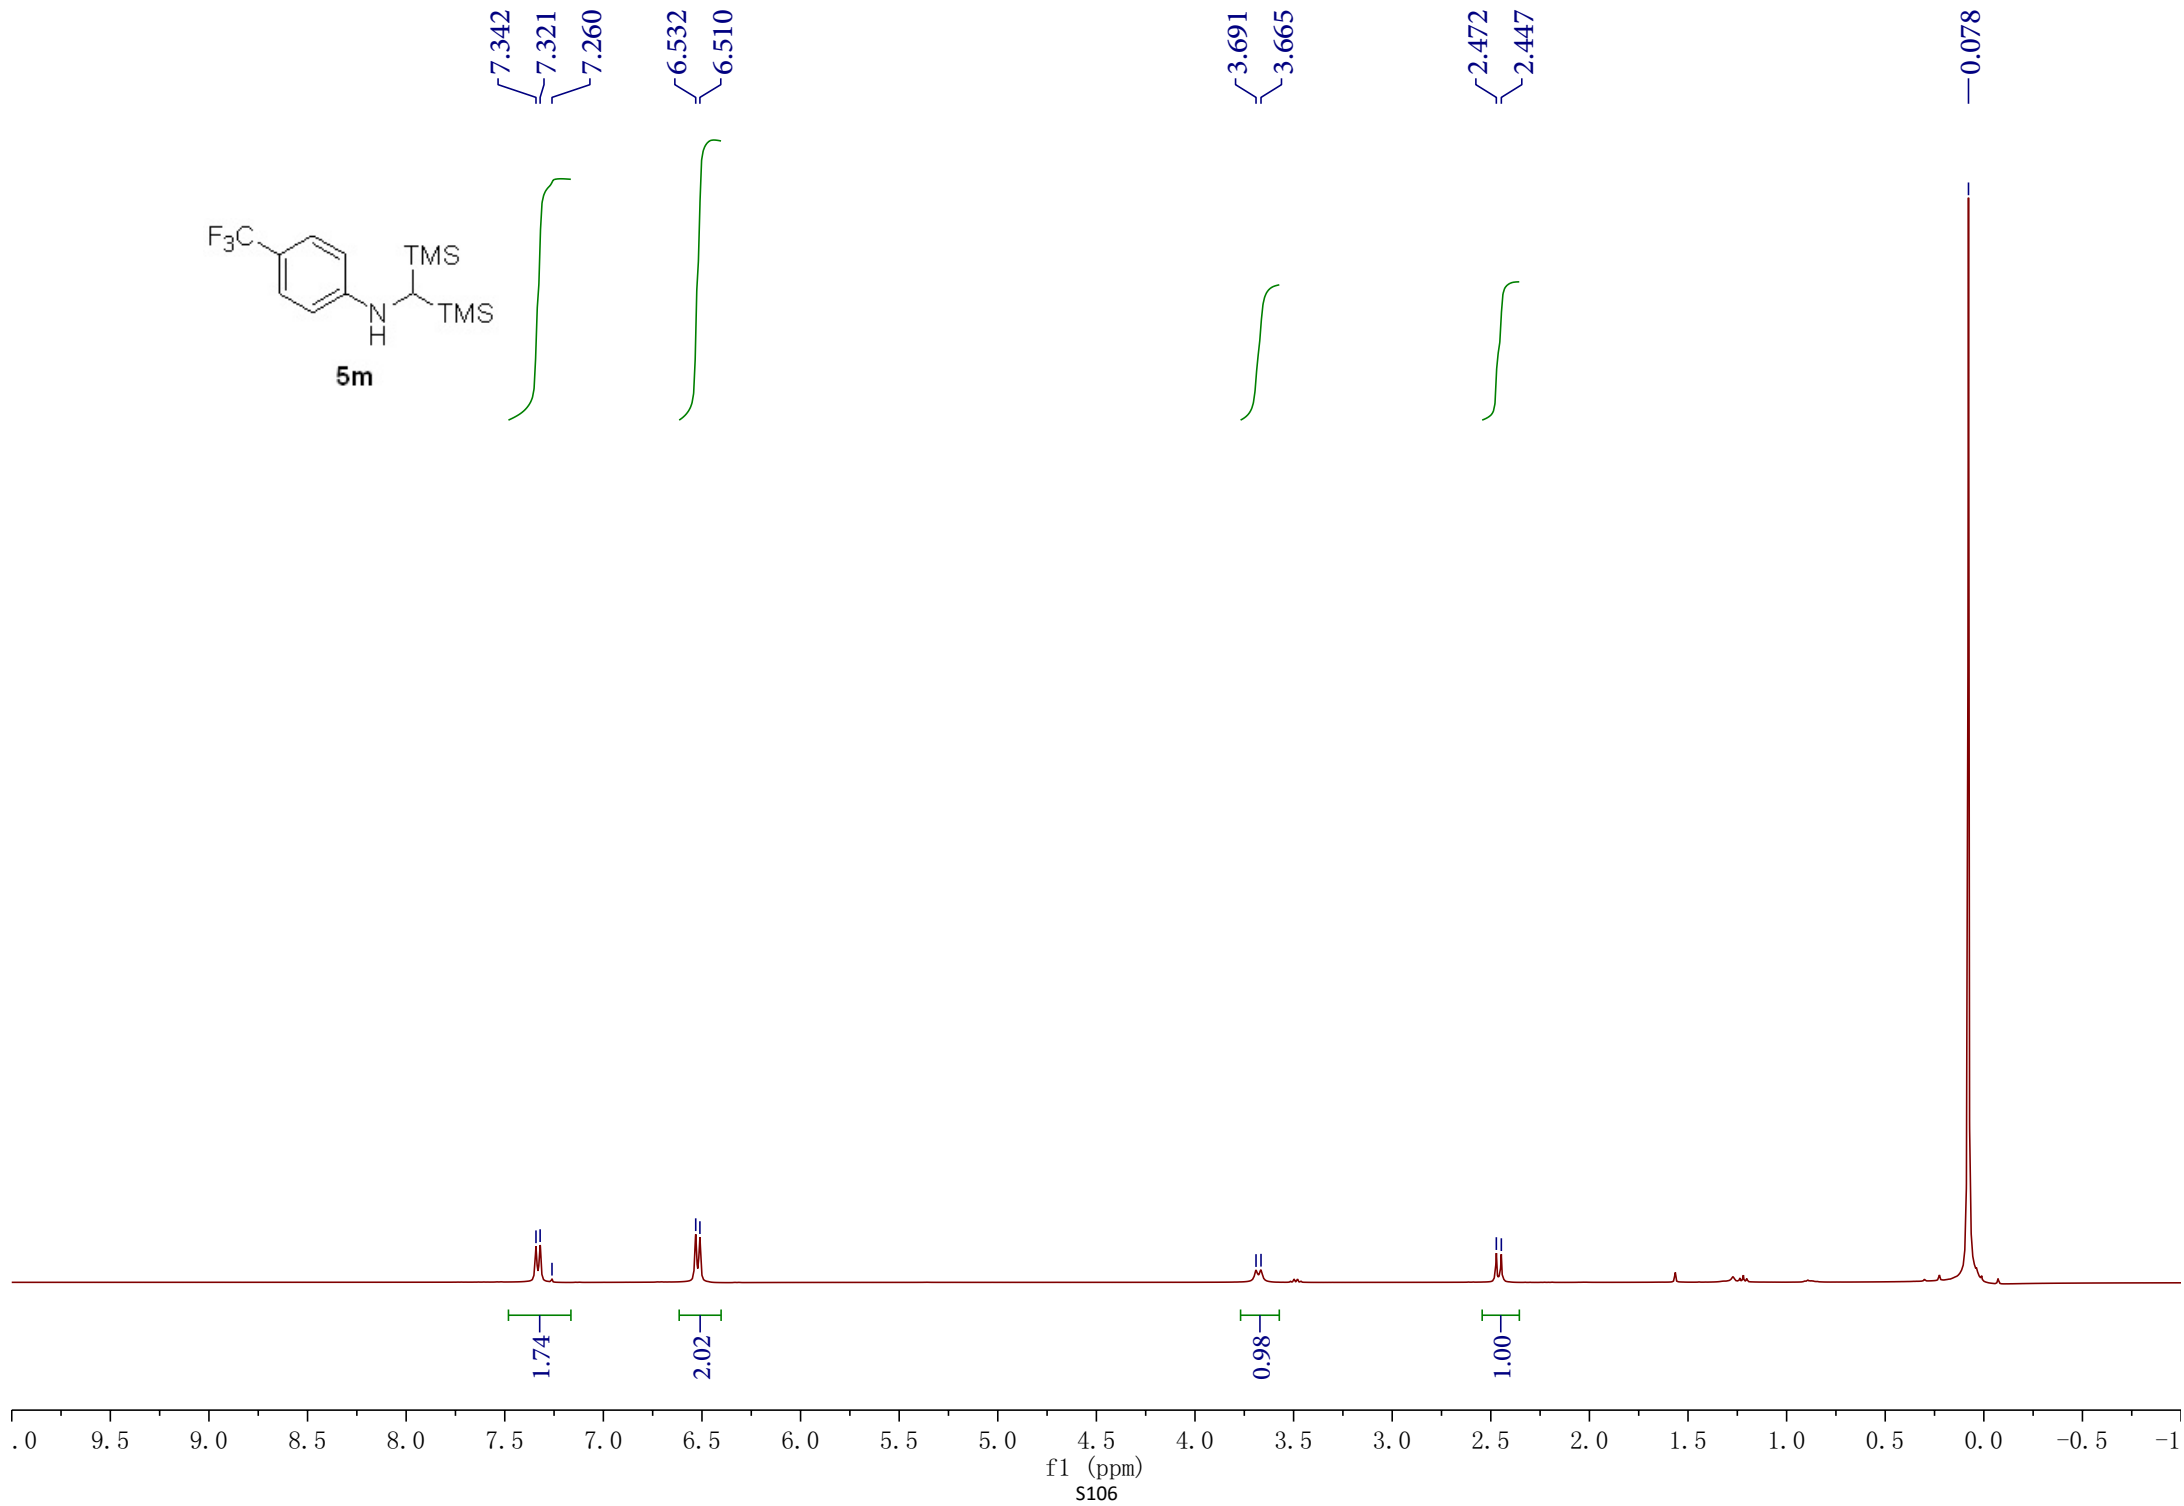

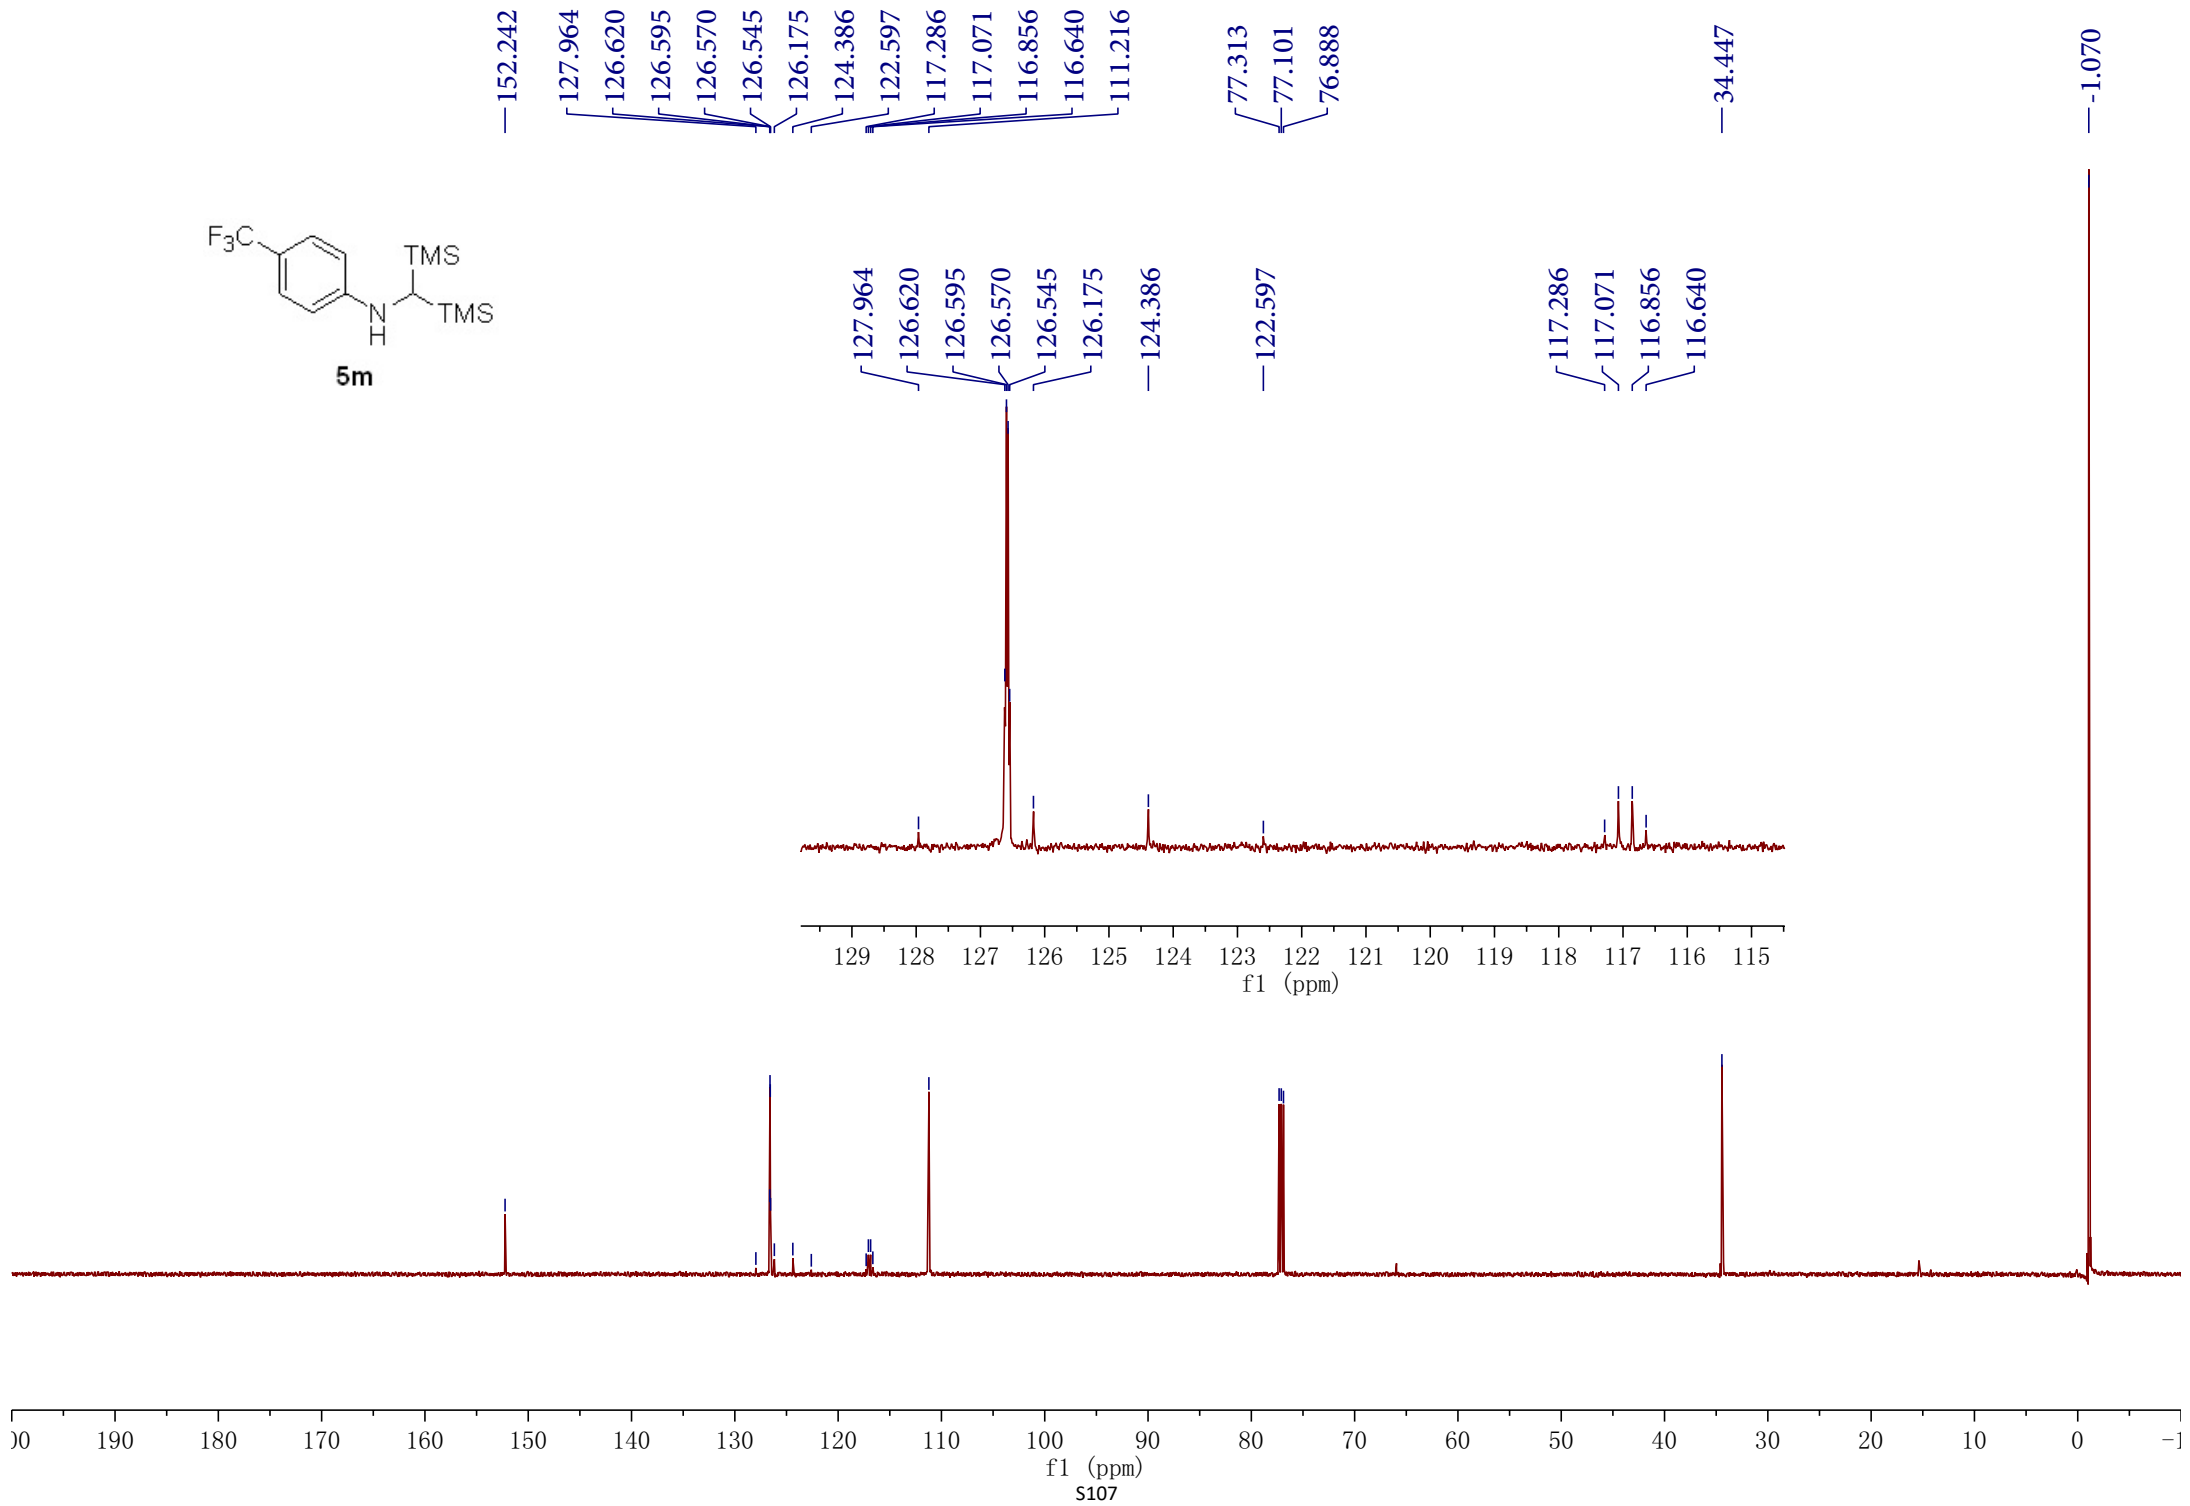

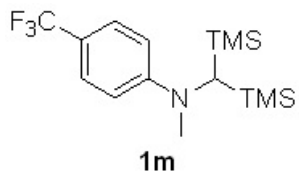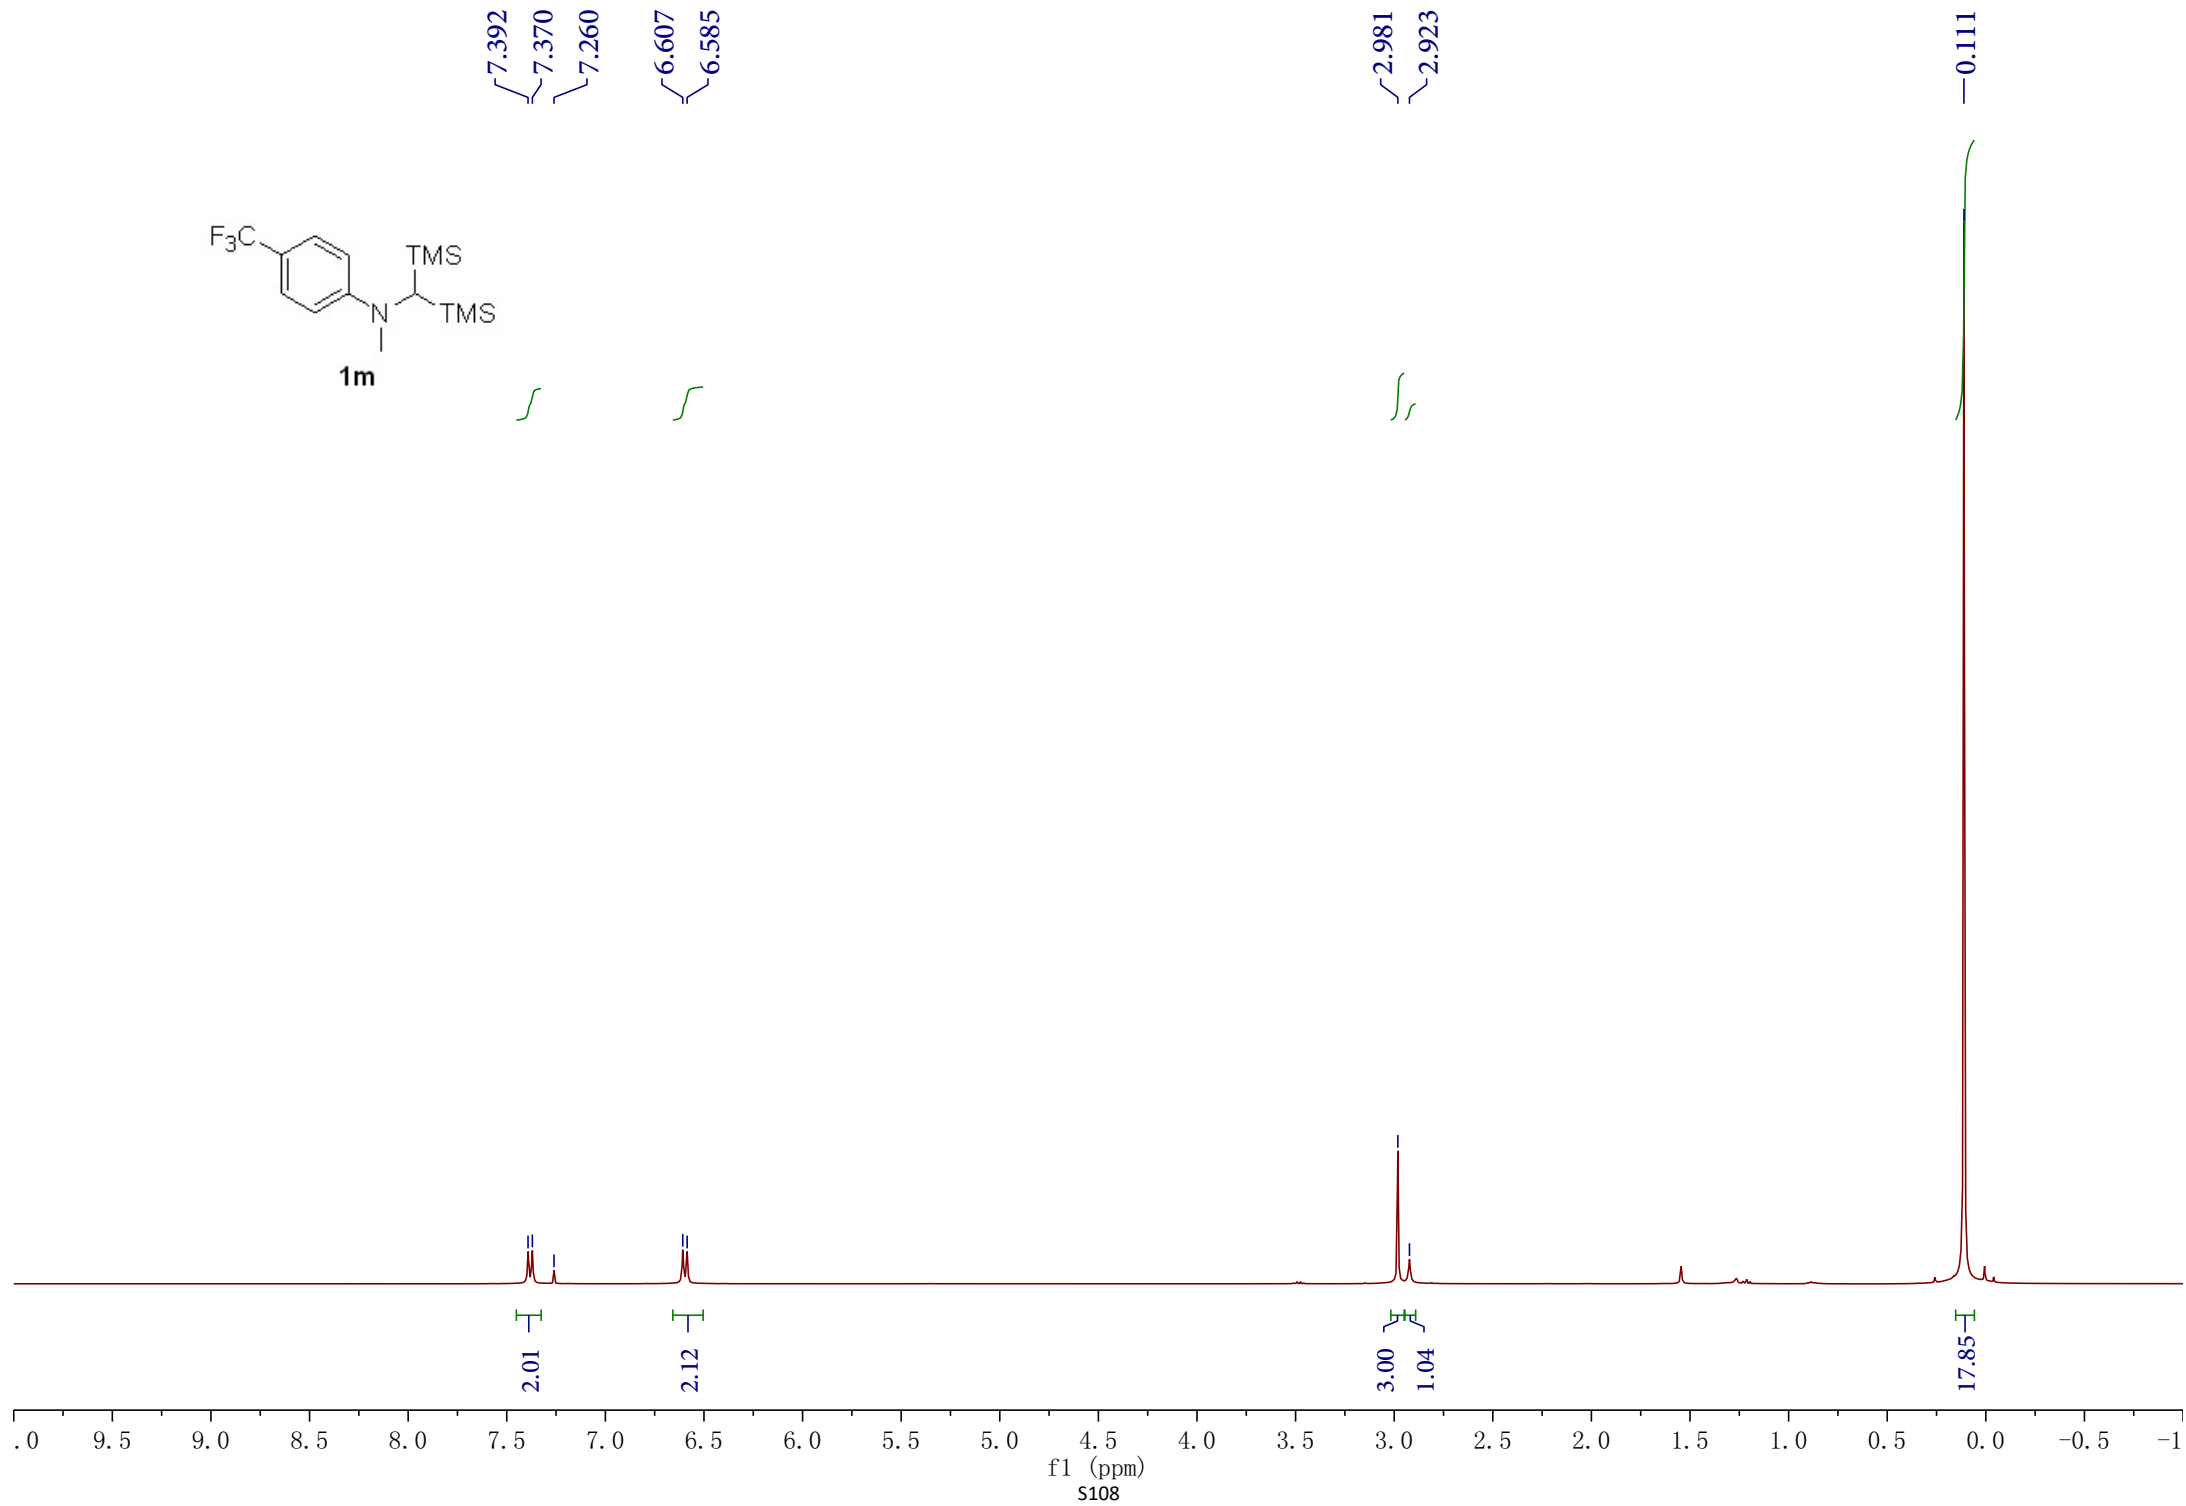

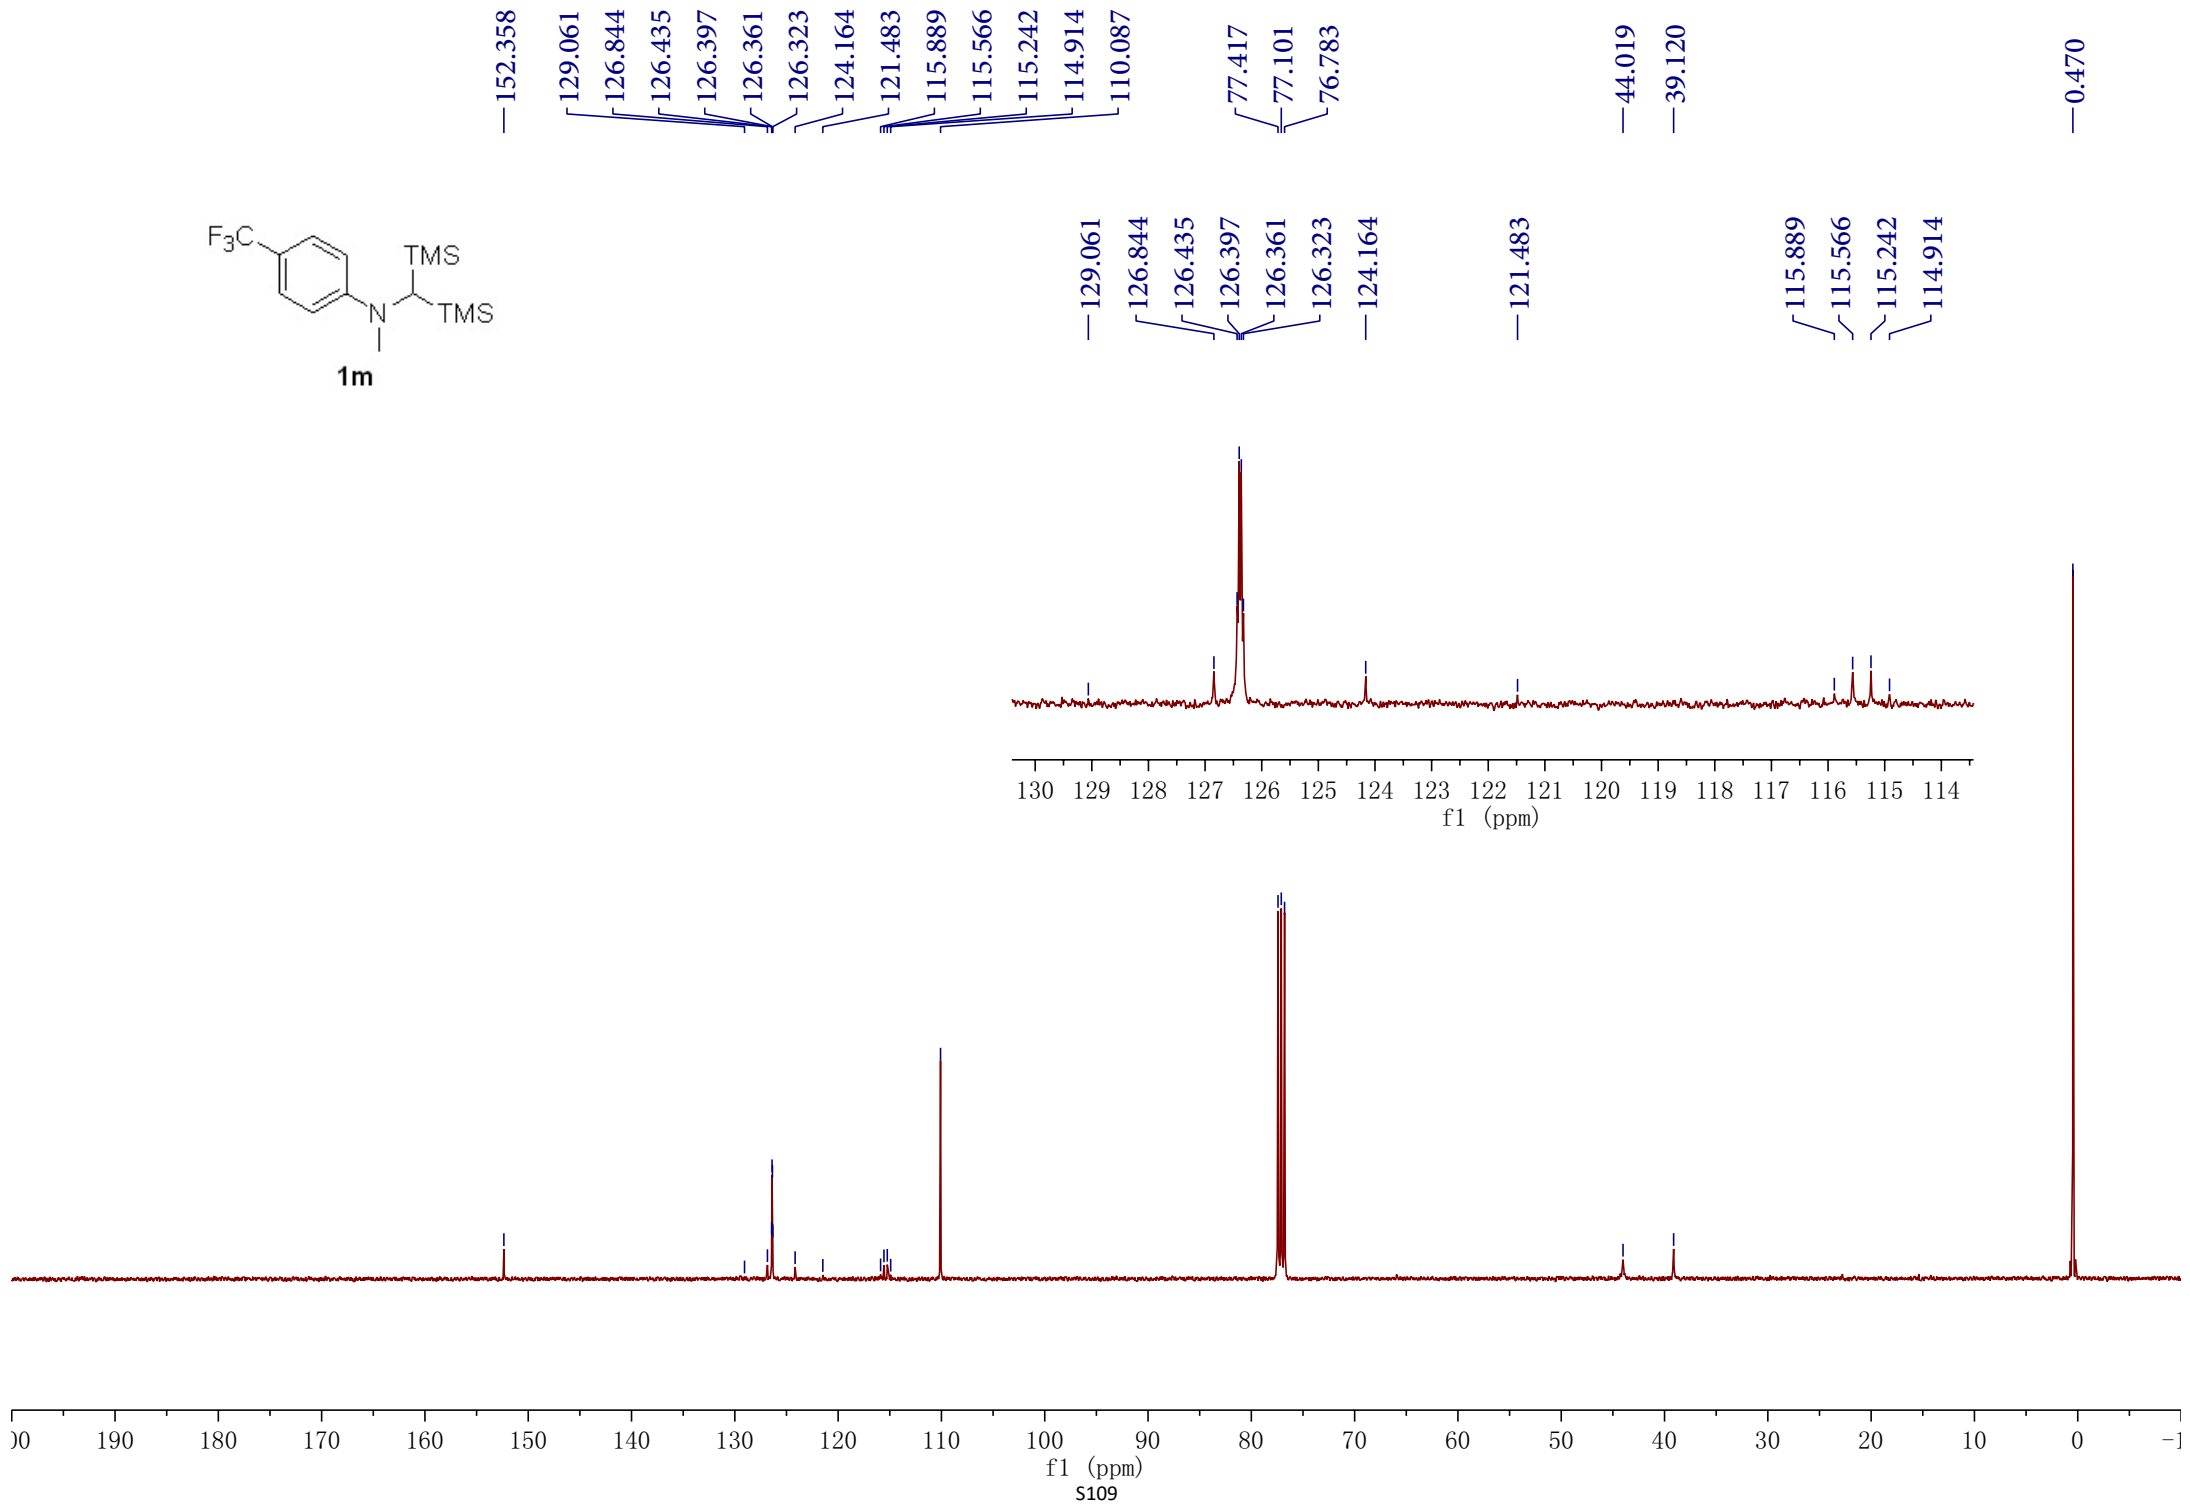

7.318  
7.314  
7.298  
7.286  
7.280  
7.260  
7.220  
7.219  
7.205  
7.186  
— 6.420

2.957  
2.943  
2.937  
2.930  
2.917  
2.703  
2.685  
2.667  
2.219  
2.201  
2.188  
2.181  
2.161  
2.143  
2.062  
— 0.190

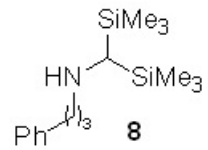

//

/

/

/

/

/

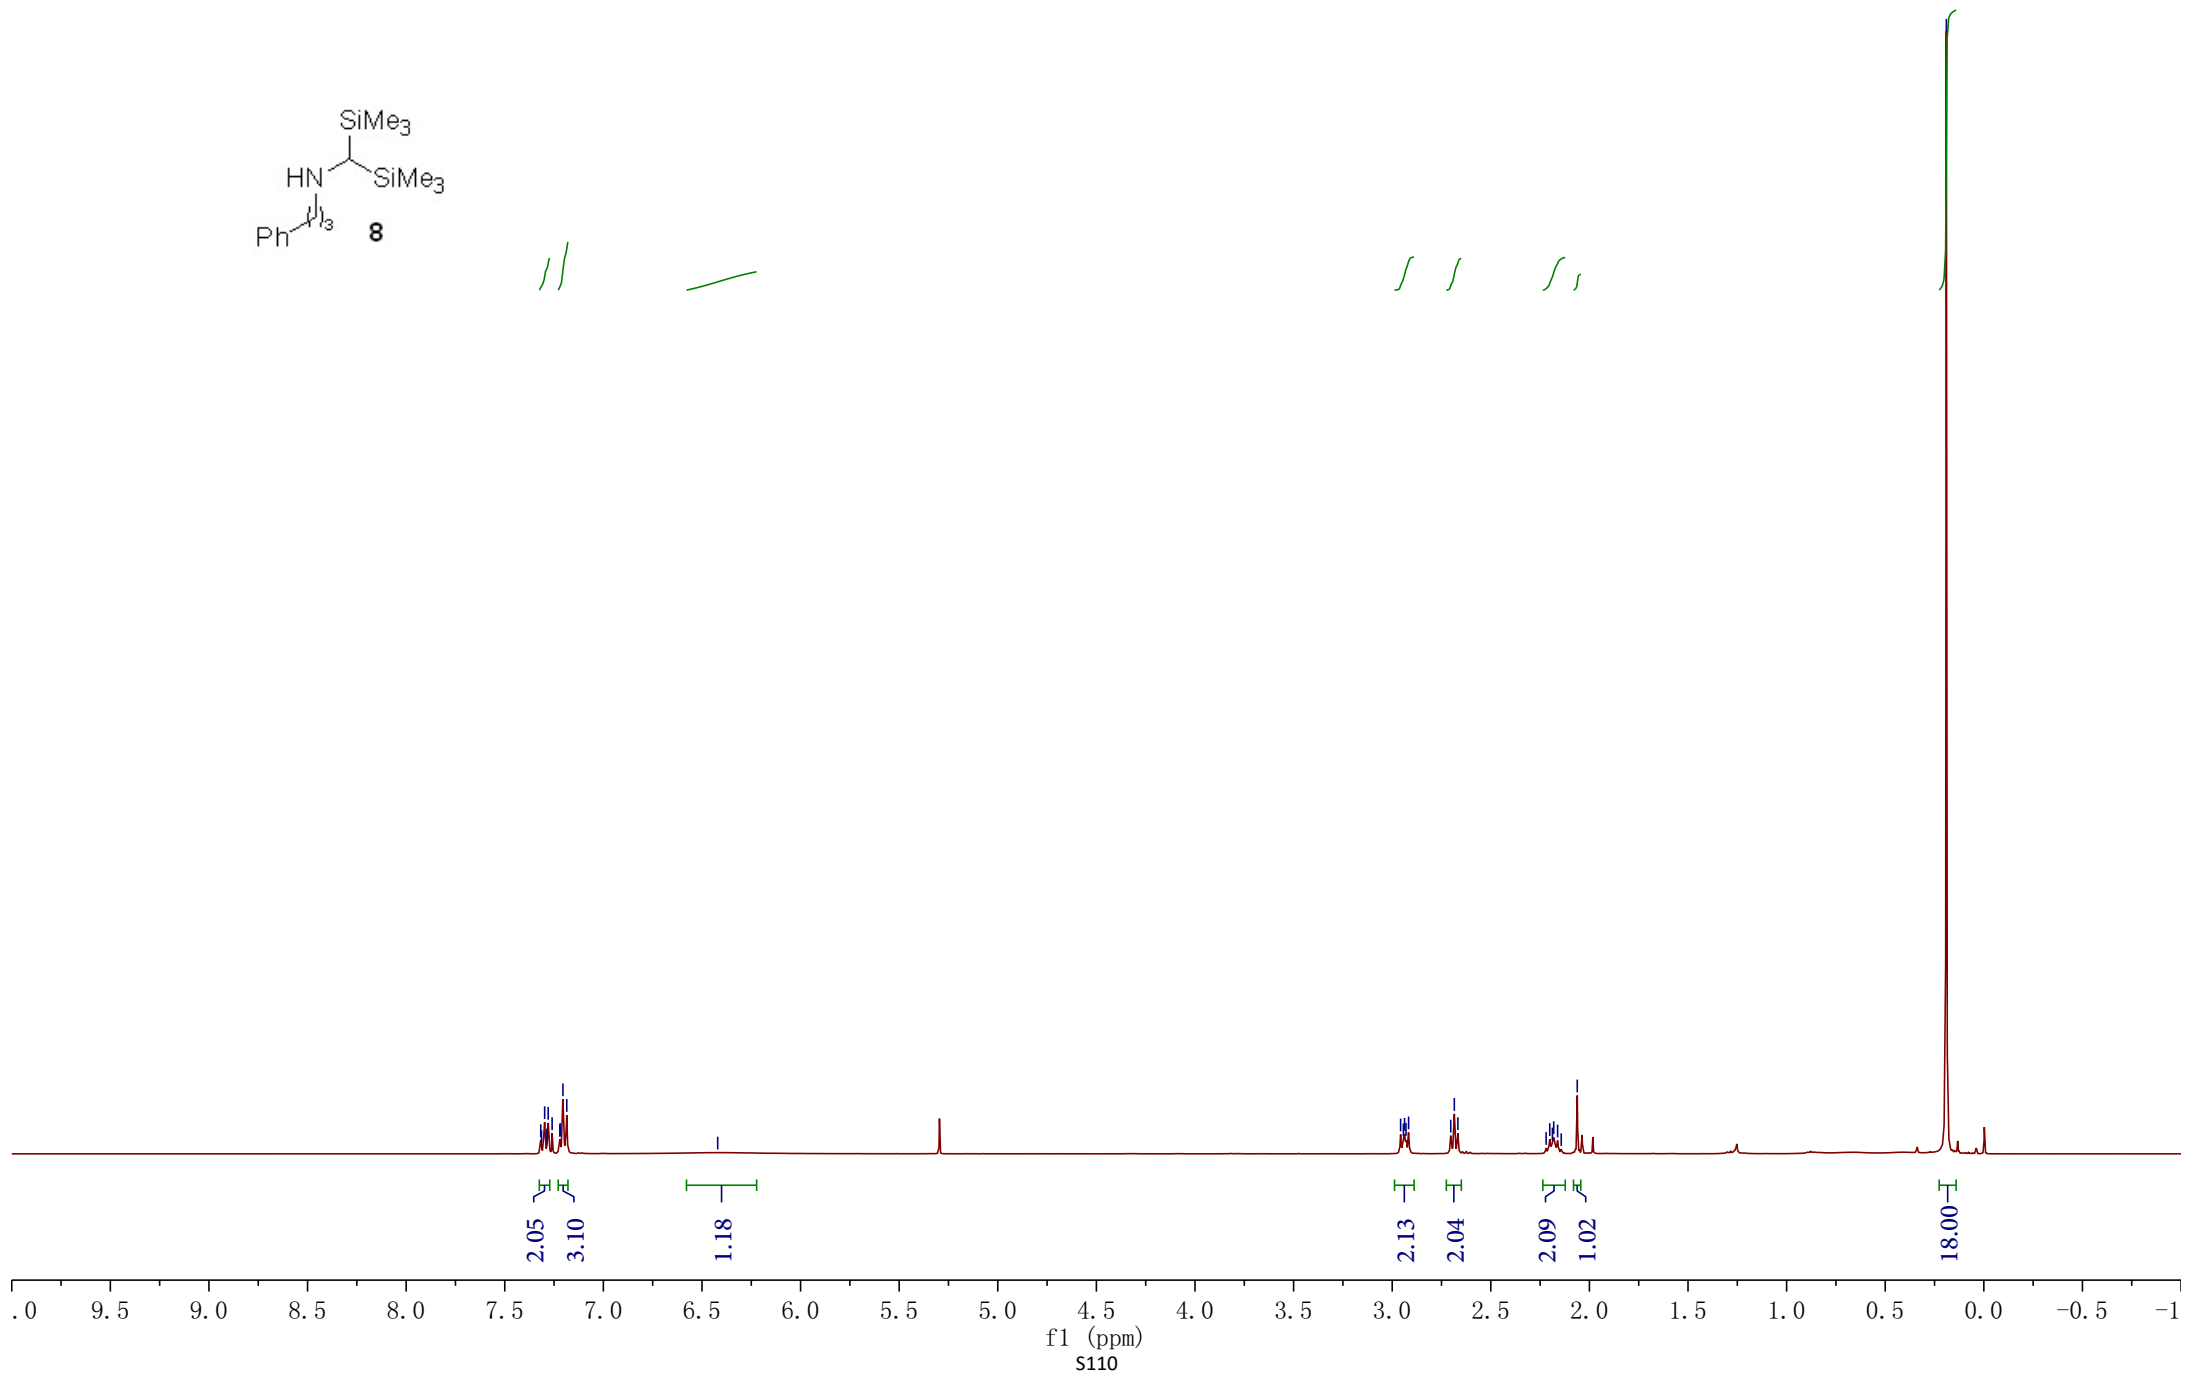

2.05  
3.10

1.18

2.13  
2.04

2.09  
1.02

18.00

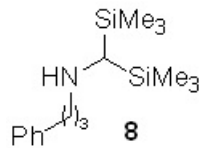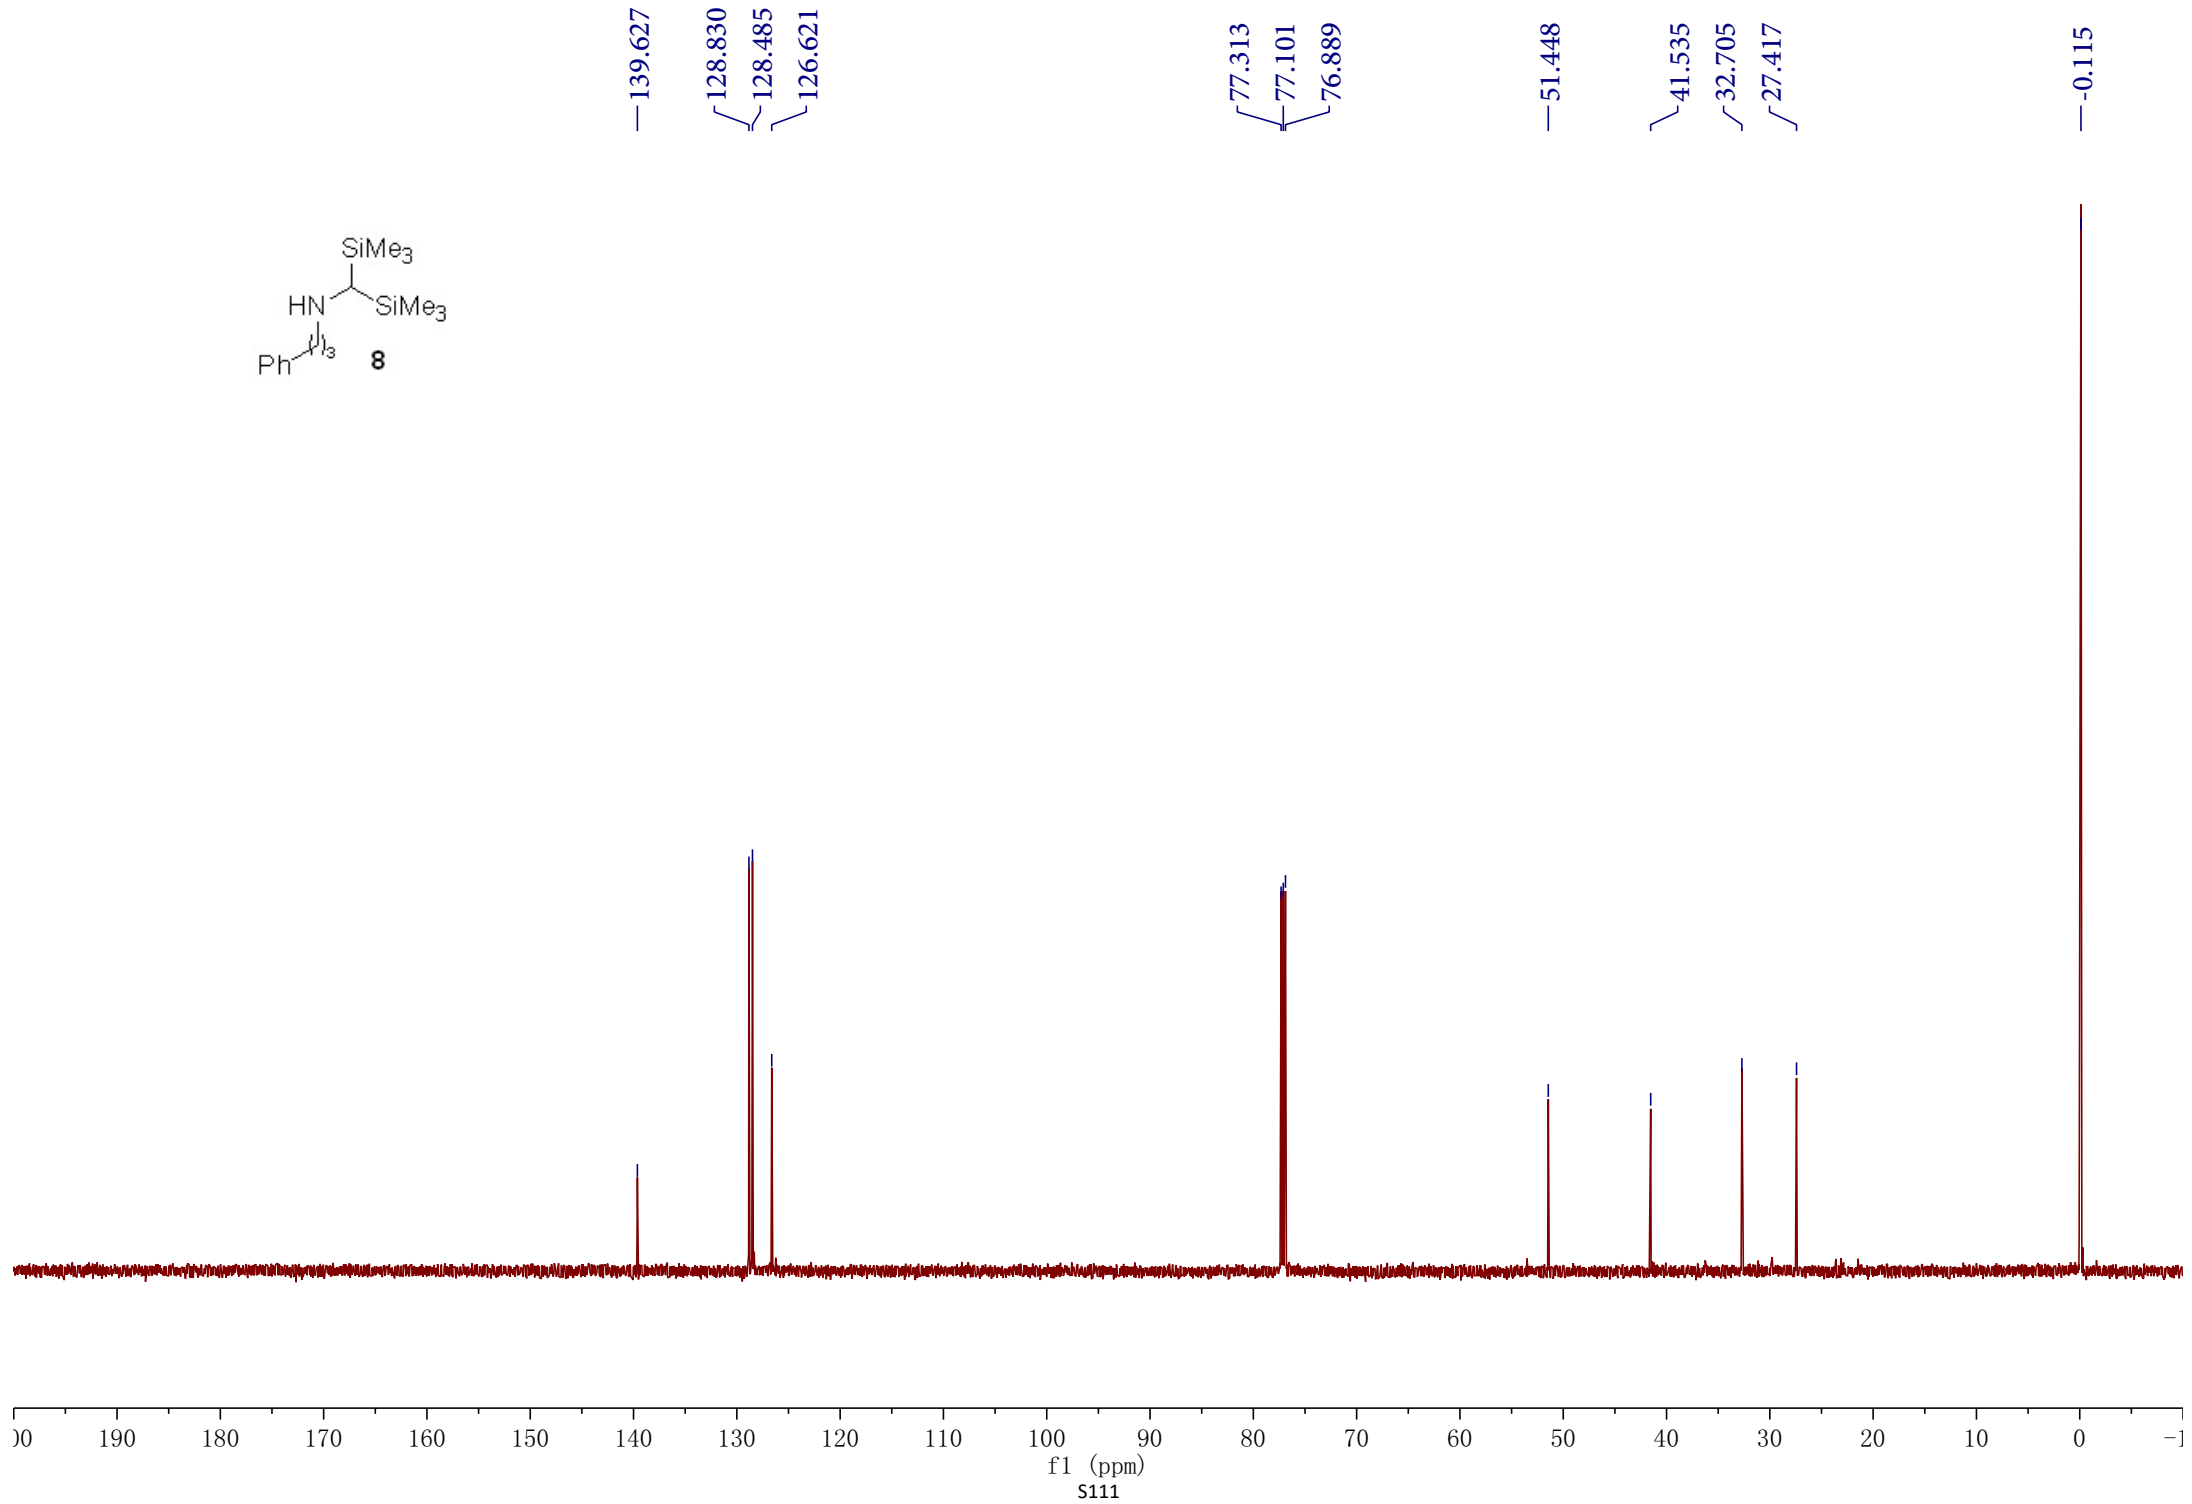

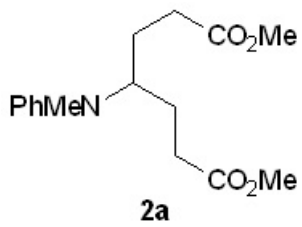

7.260  
7.212  
7.194  
7.190  
7.172  
6.745  
6.725  
6.693  
6.674  
6.656

4.008  
3.995  
3.983  
3.971  
3.958  
3.946  
3.934  
3.581

2.672  
2.281  
2.277  
2.265  
2.259  
2.244  
2.240  
1.908  
1.890  
1.884  
1.874  
1.865  
1.855  
1.848  
1.842  
1.835  
1.822

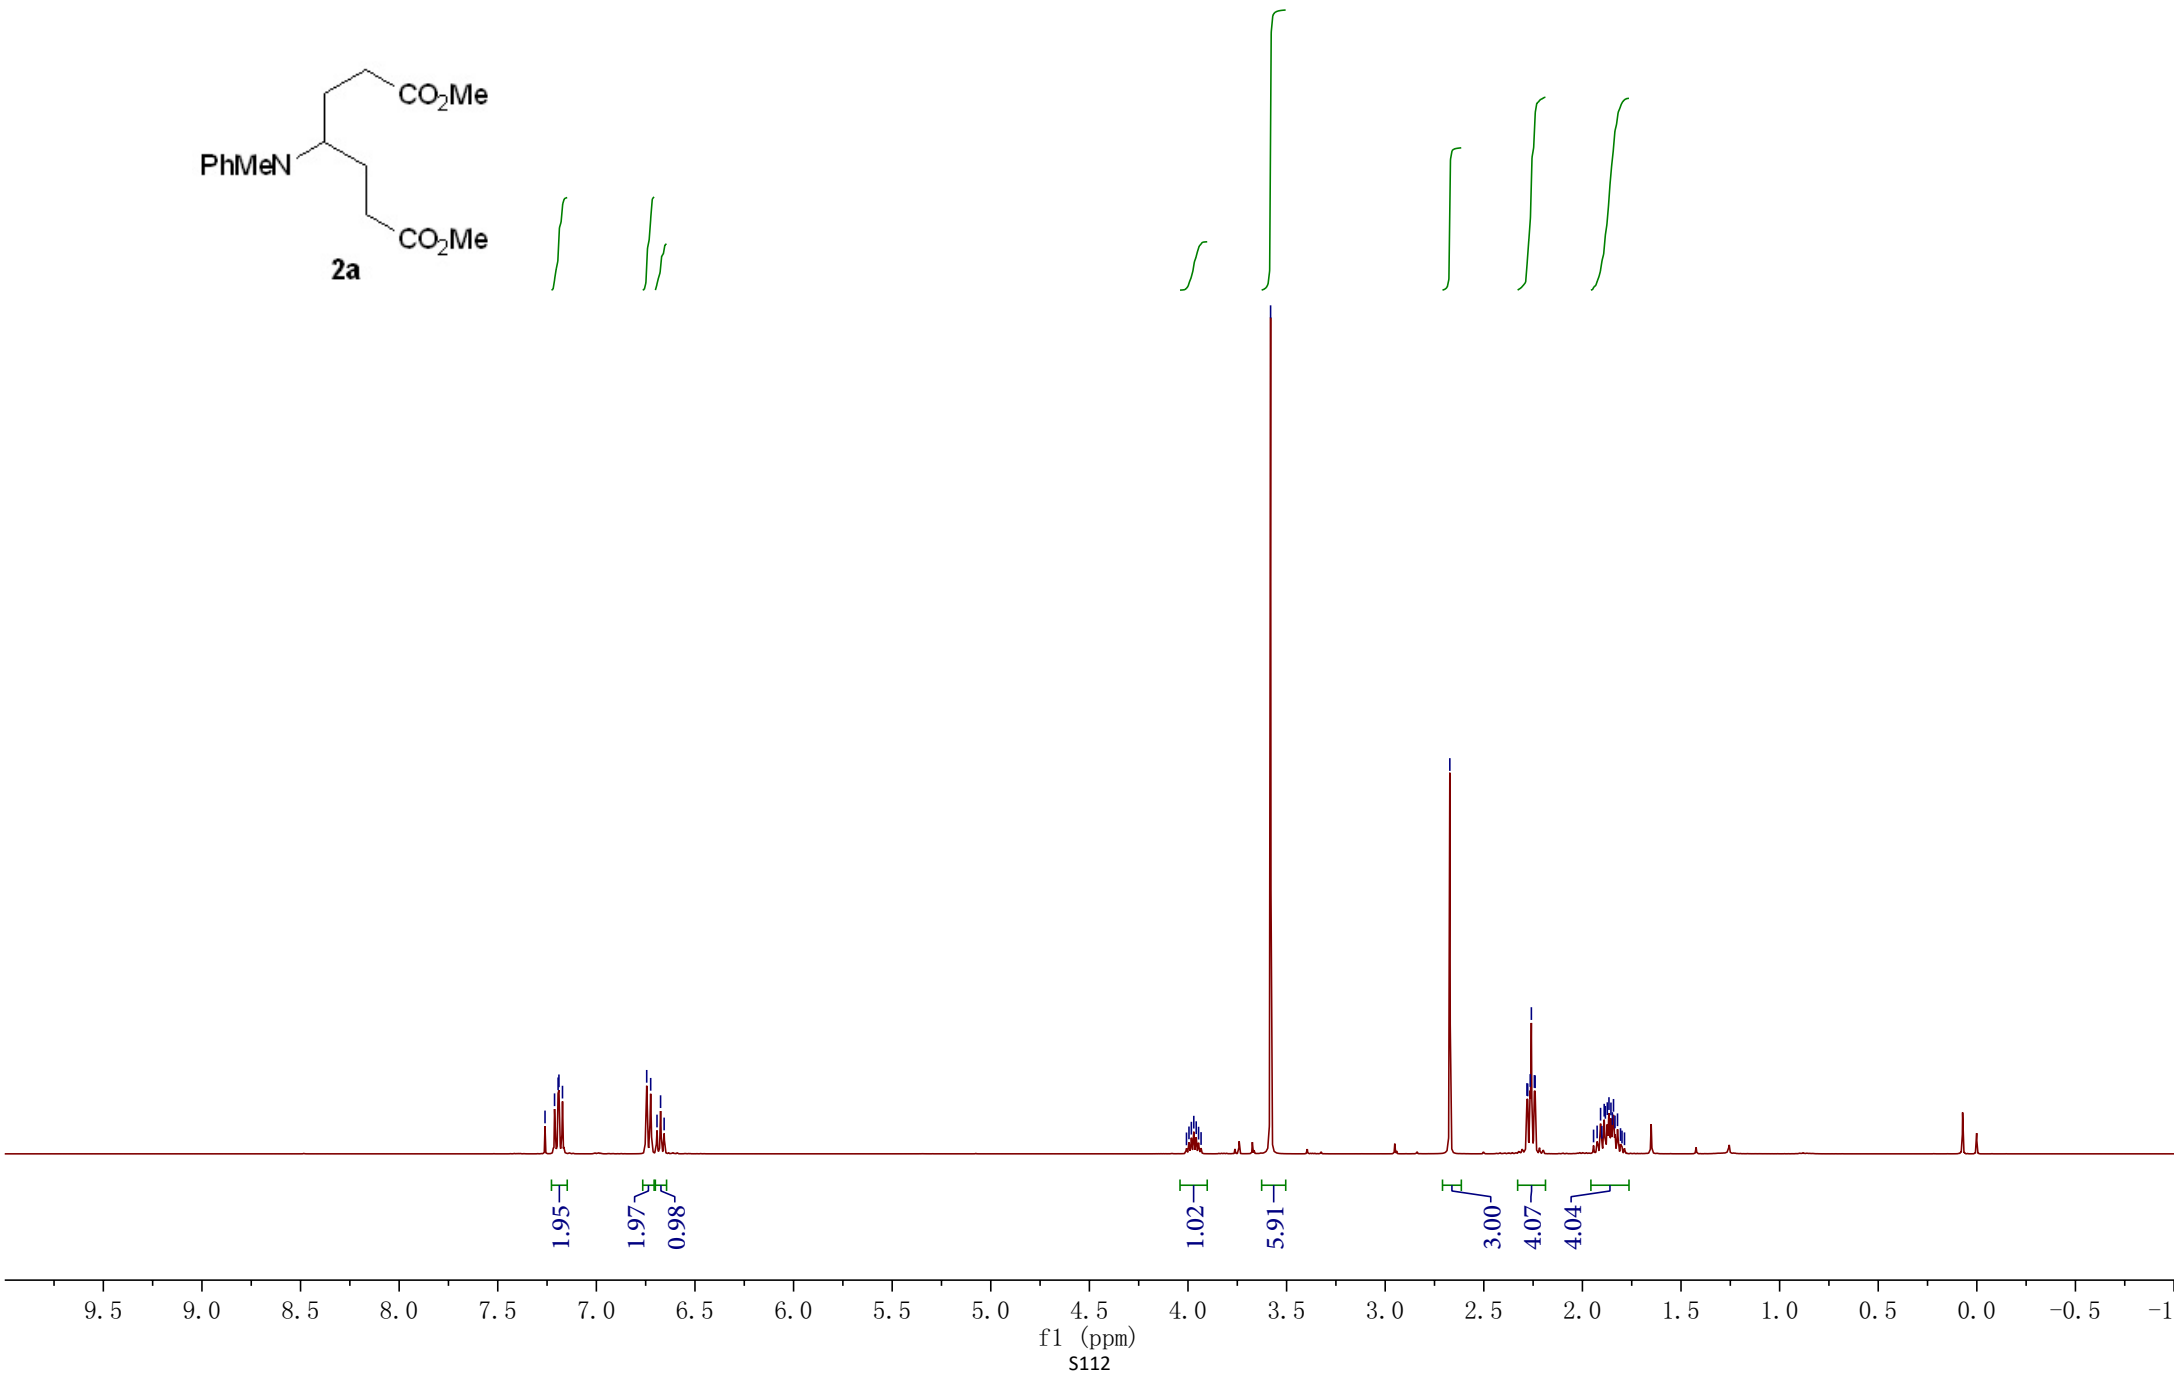



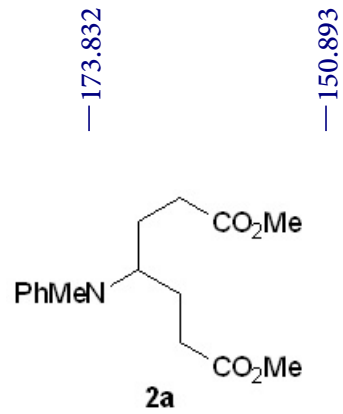

— 173.832

— 150.893

— 129.220

— 116.672

— 112.743

77.417

77.100

76.783

— 56.529

— 51.578

31.044

— 29.466

28.054

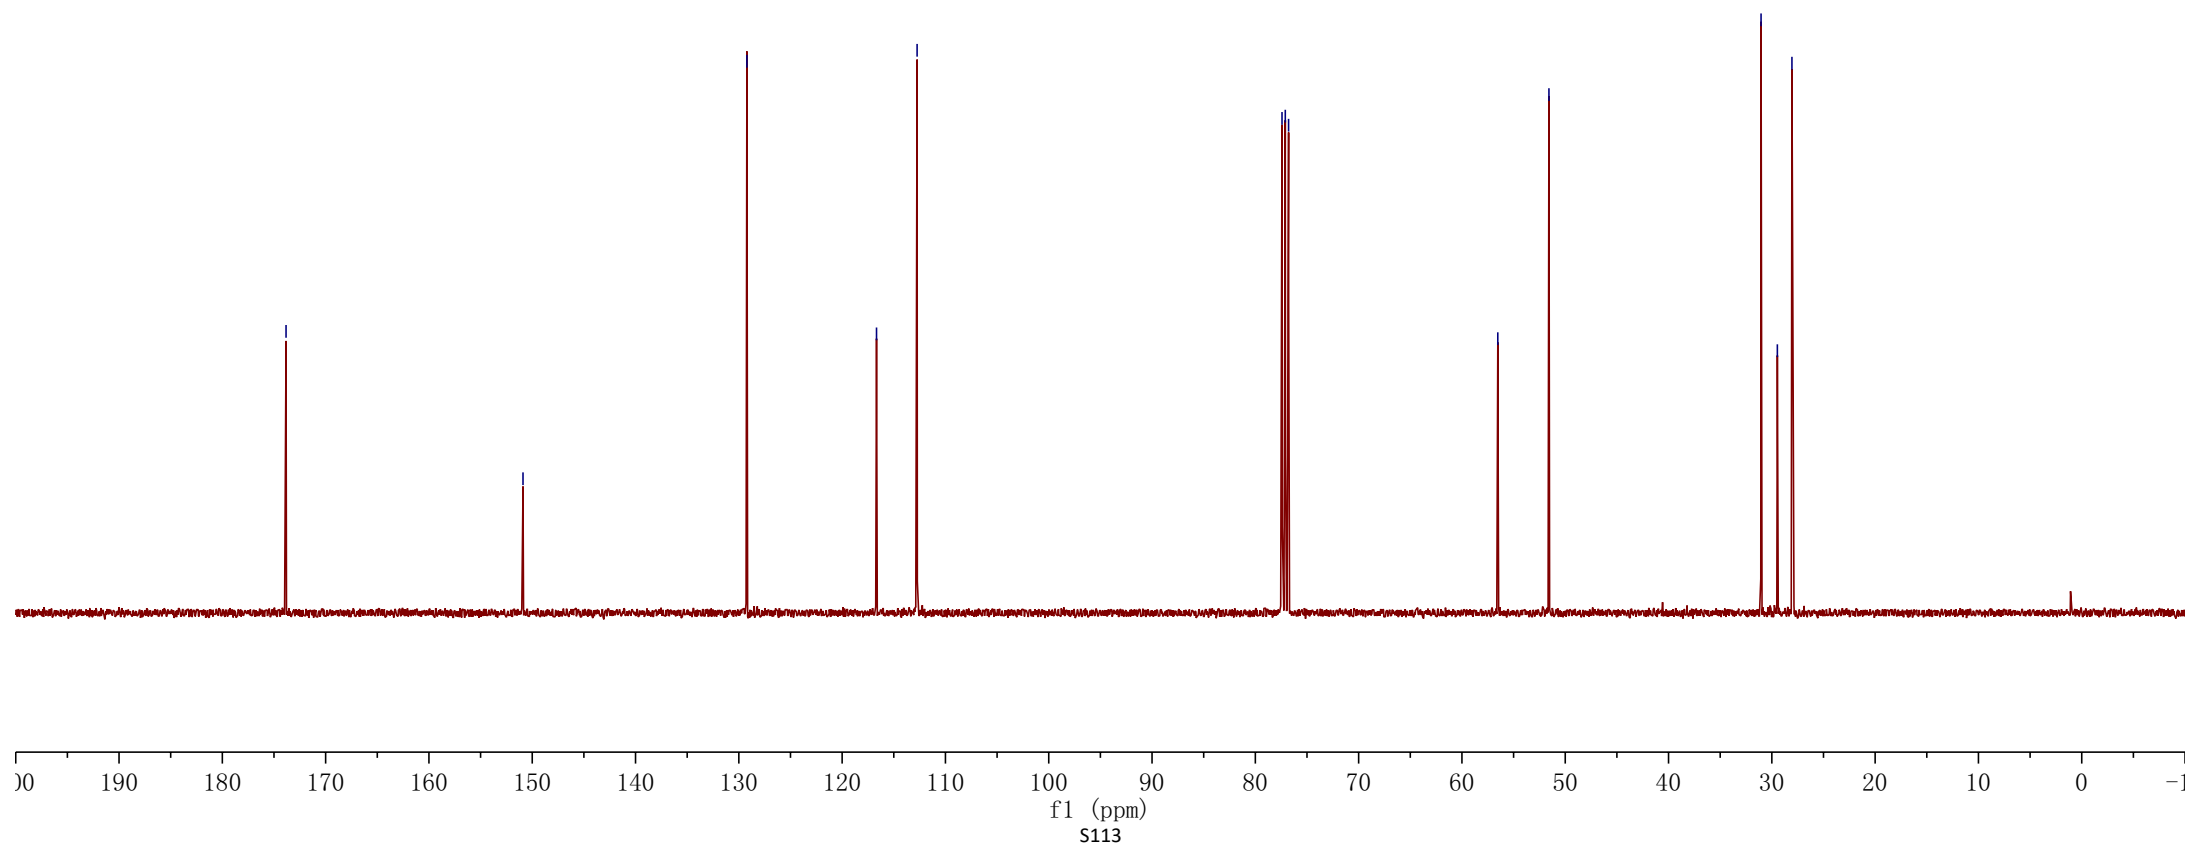

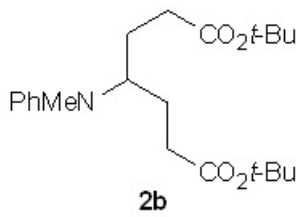

7.260  
7.200  
7.182  
7.178  
7.160  
6.752  
6.732  
6.679  
6.661  
6.643

3.966  
3.953  
3.942  
3.929  
3.916  
3.906  
3.893

2.672  
2.184  
2.165  
2.147  
1.877  
1.860  
1.842  
1.824  
1.821  
1.807  
1.801  
1.787  
1.782  
1.768  
1.752  
1.730

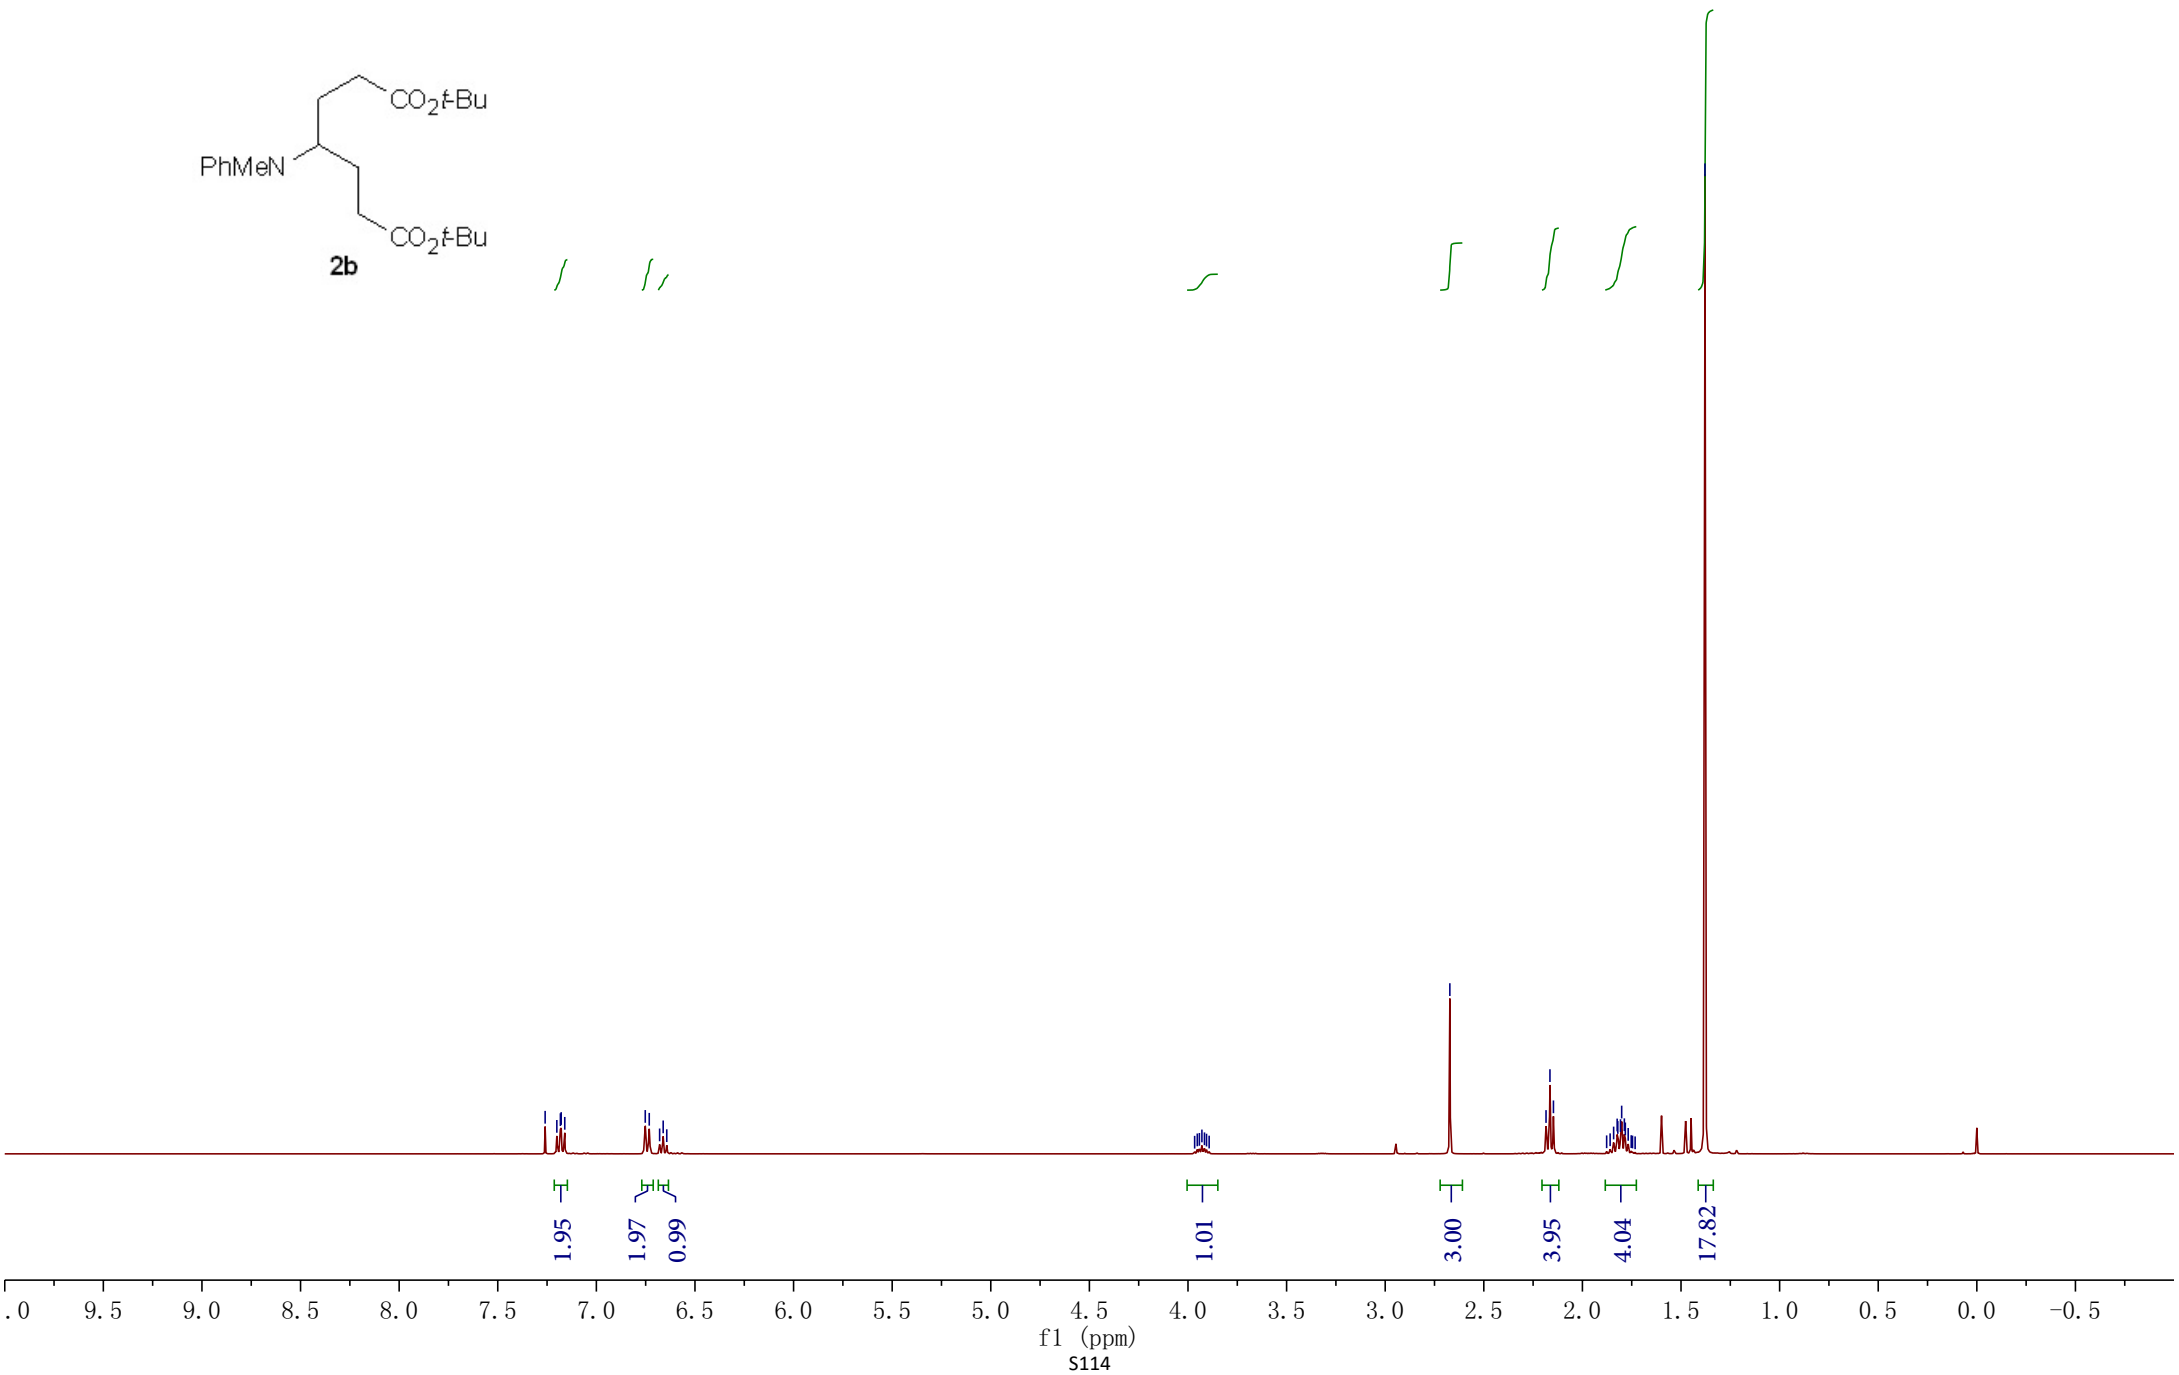

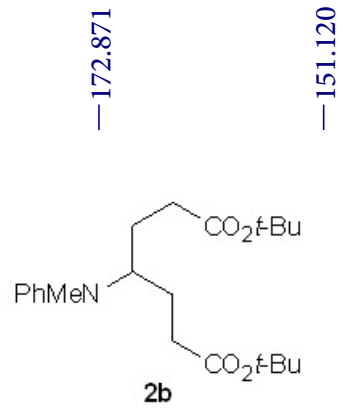

172.871

151.120

129.201

116.410

112.801

80.263

77.419

77.100

76.783

56.810

32.462

29.474

28.154

28.116

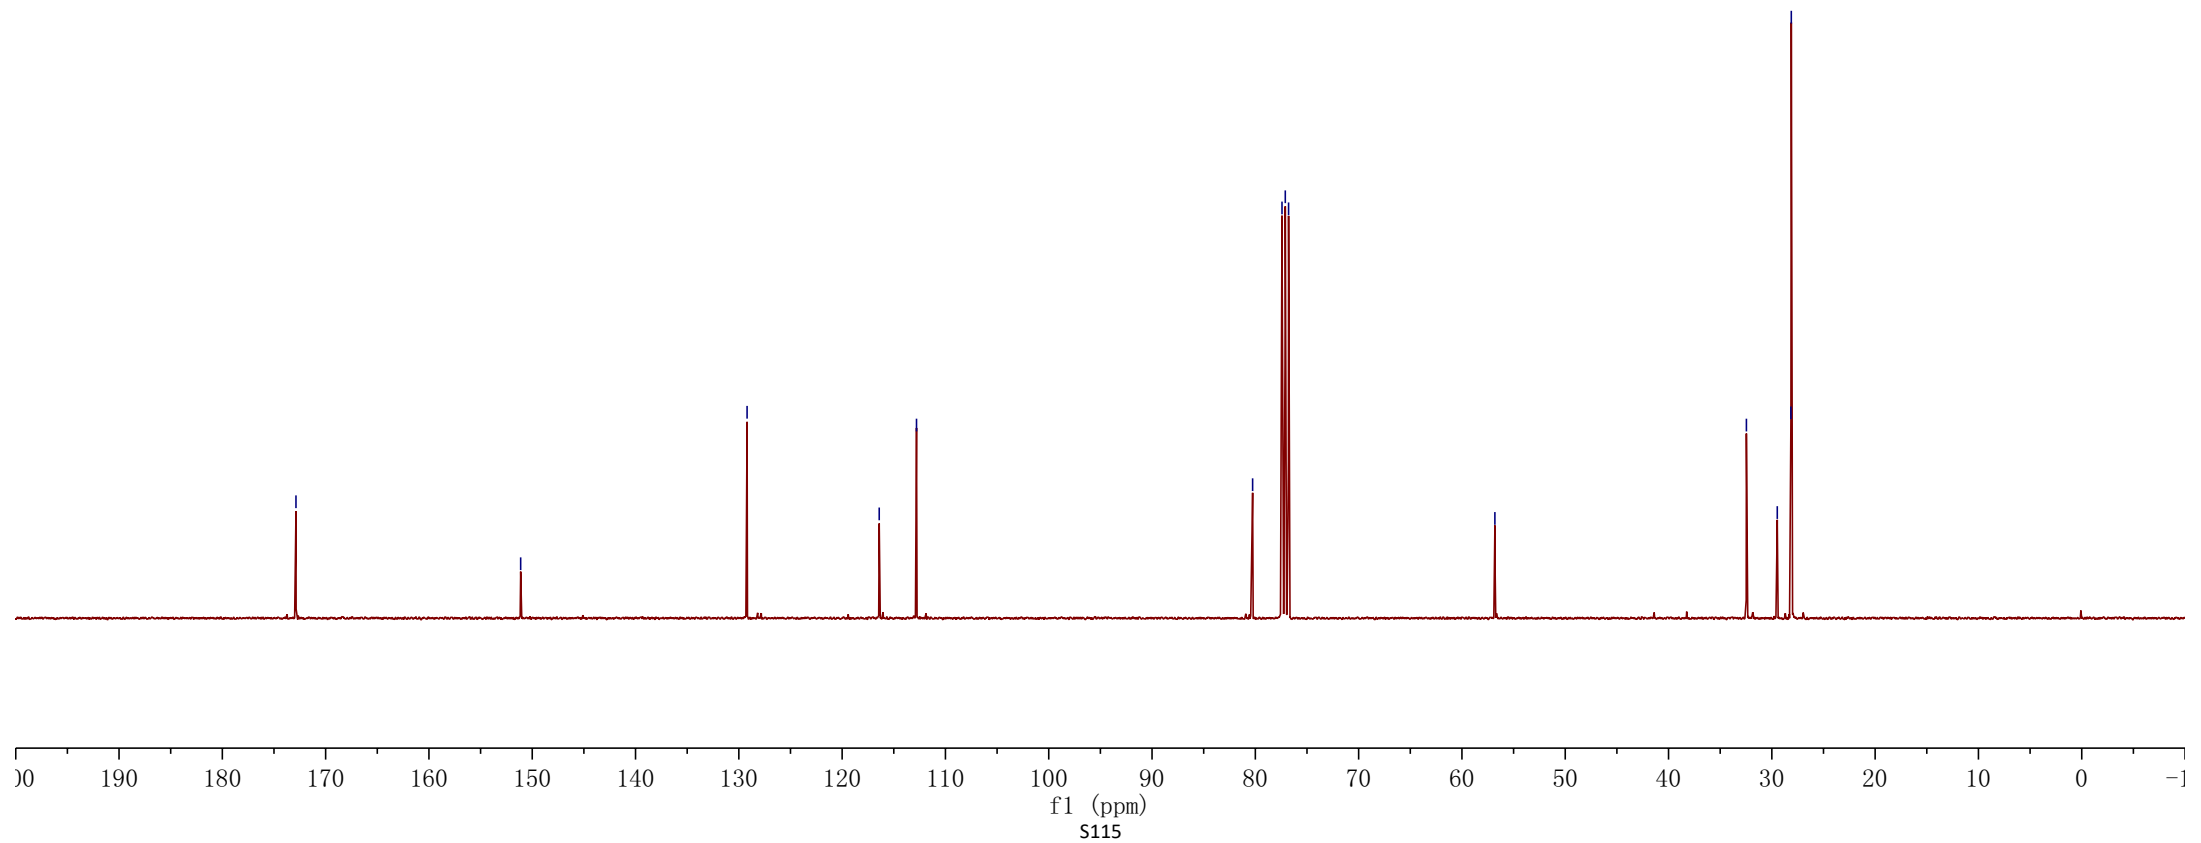

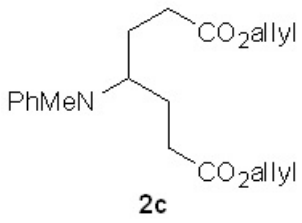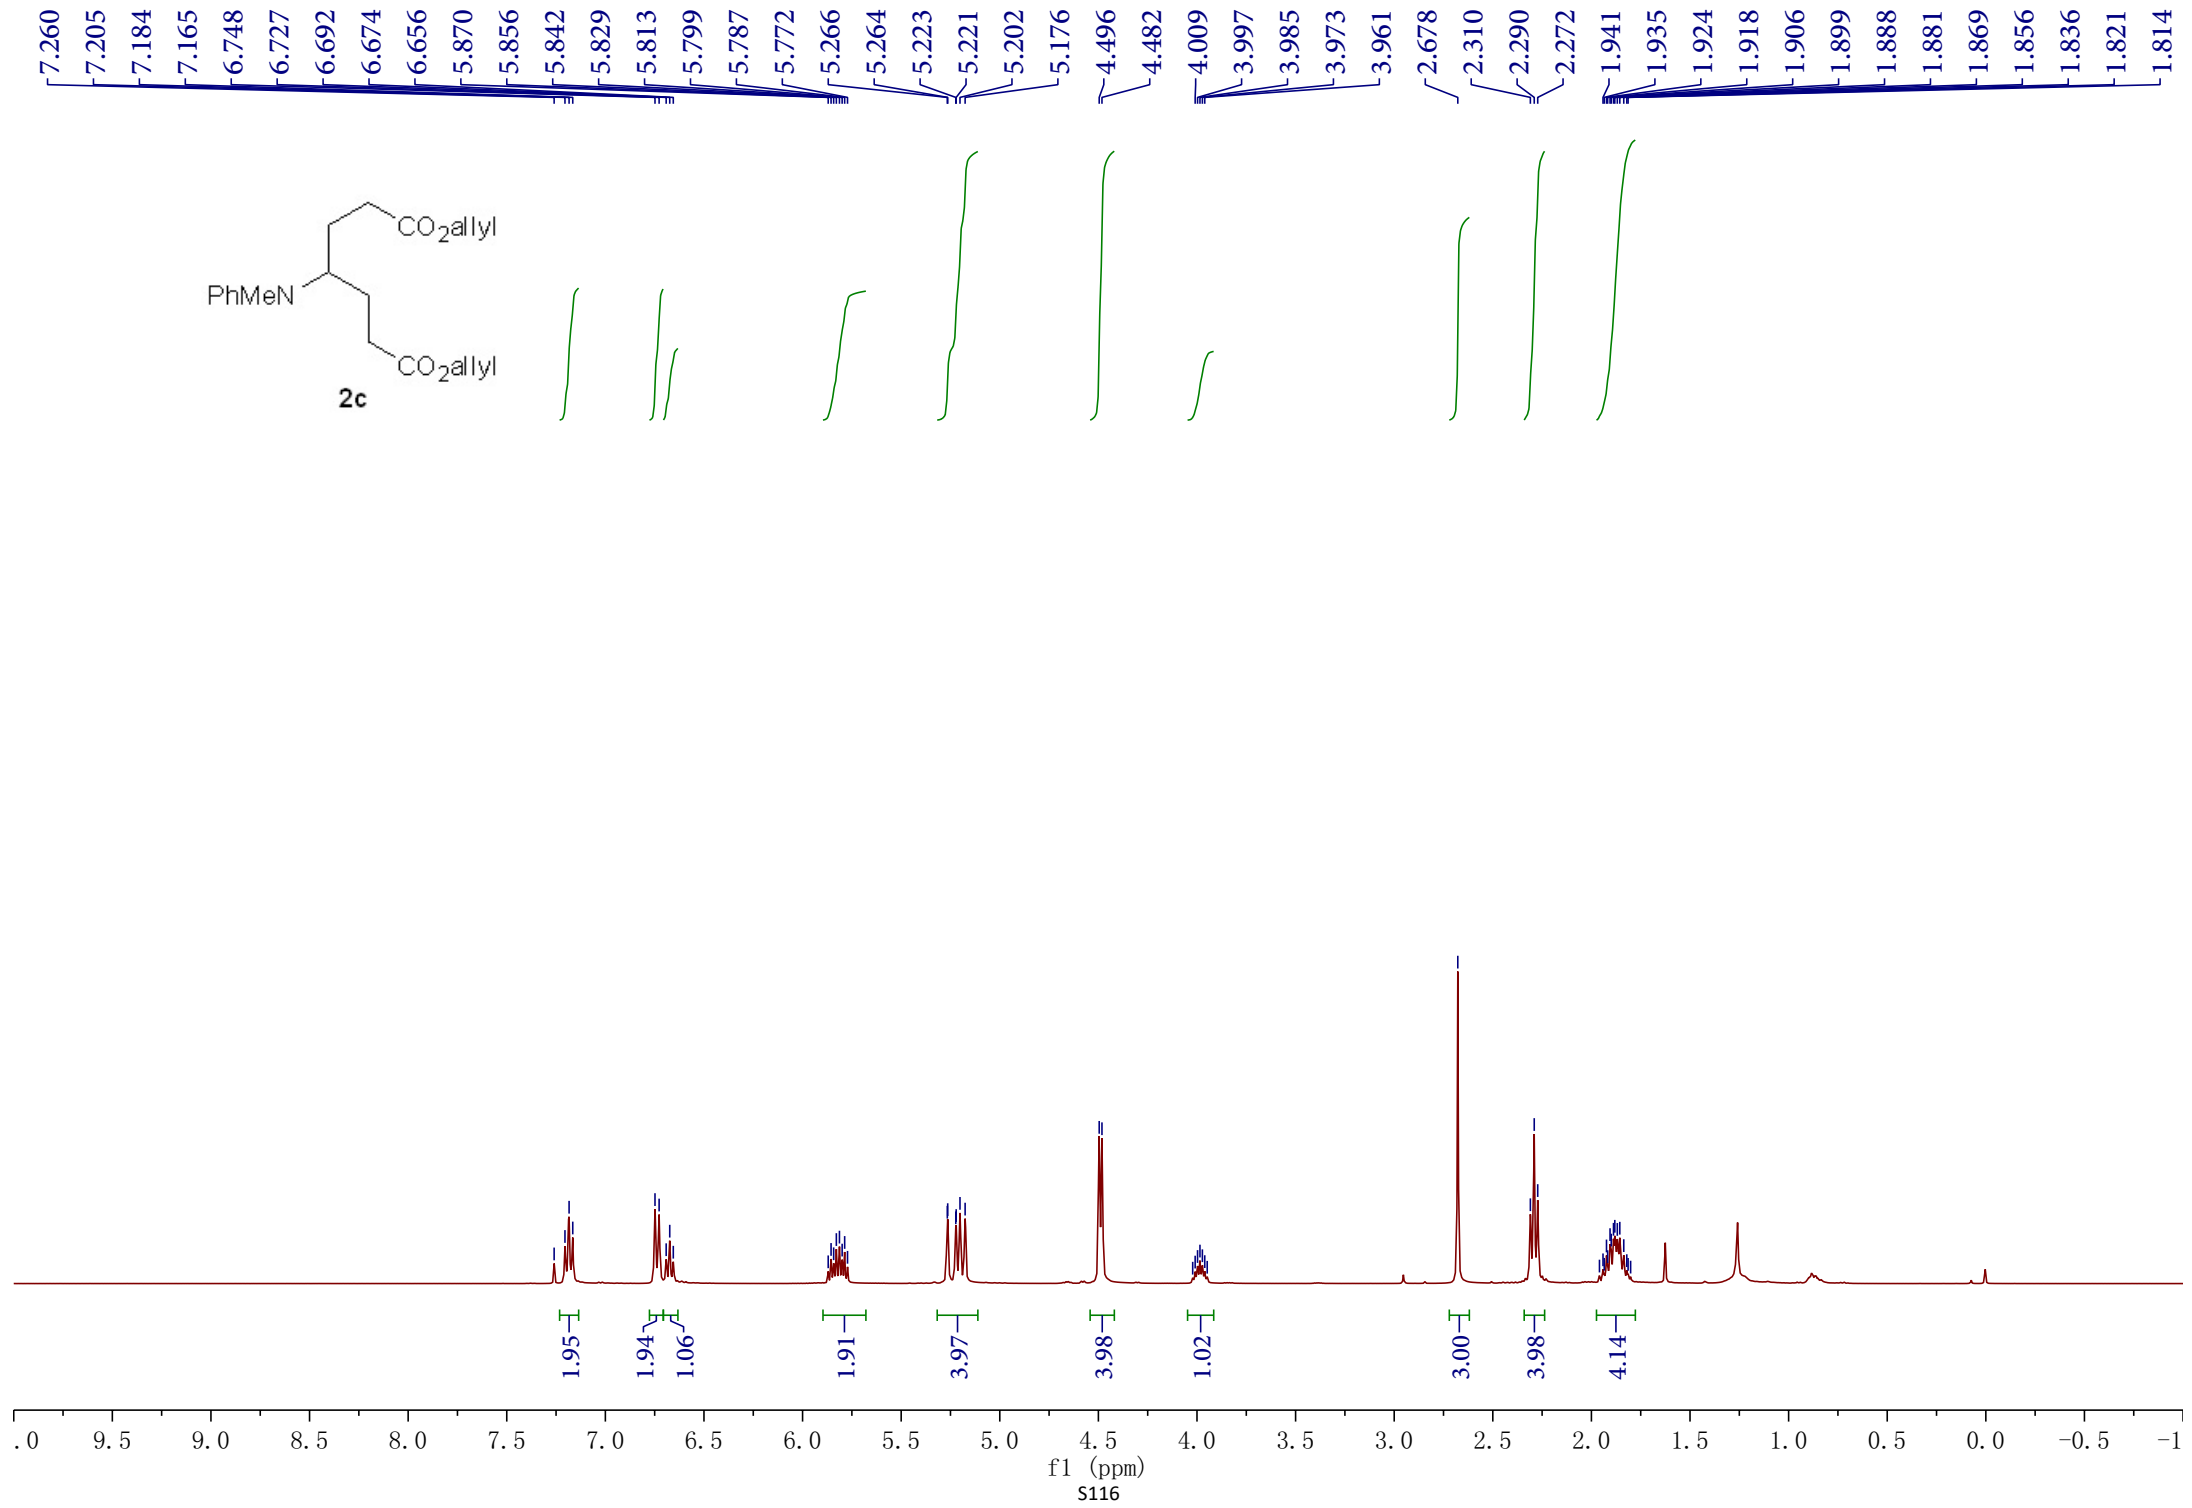

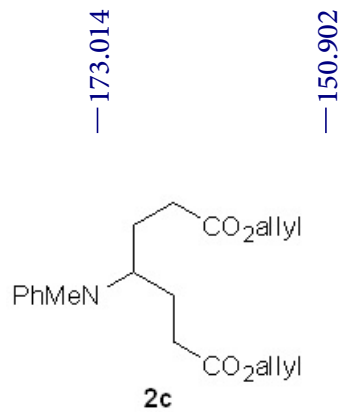

—173.014

—150.902

~132.225

~129.252

~118.336

~116.727

~112.805

~77.418

~77.100

~76.783

—65.183

—56.629

~31.241

~29.518

~28.072

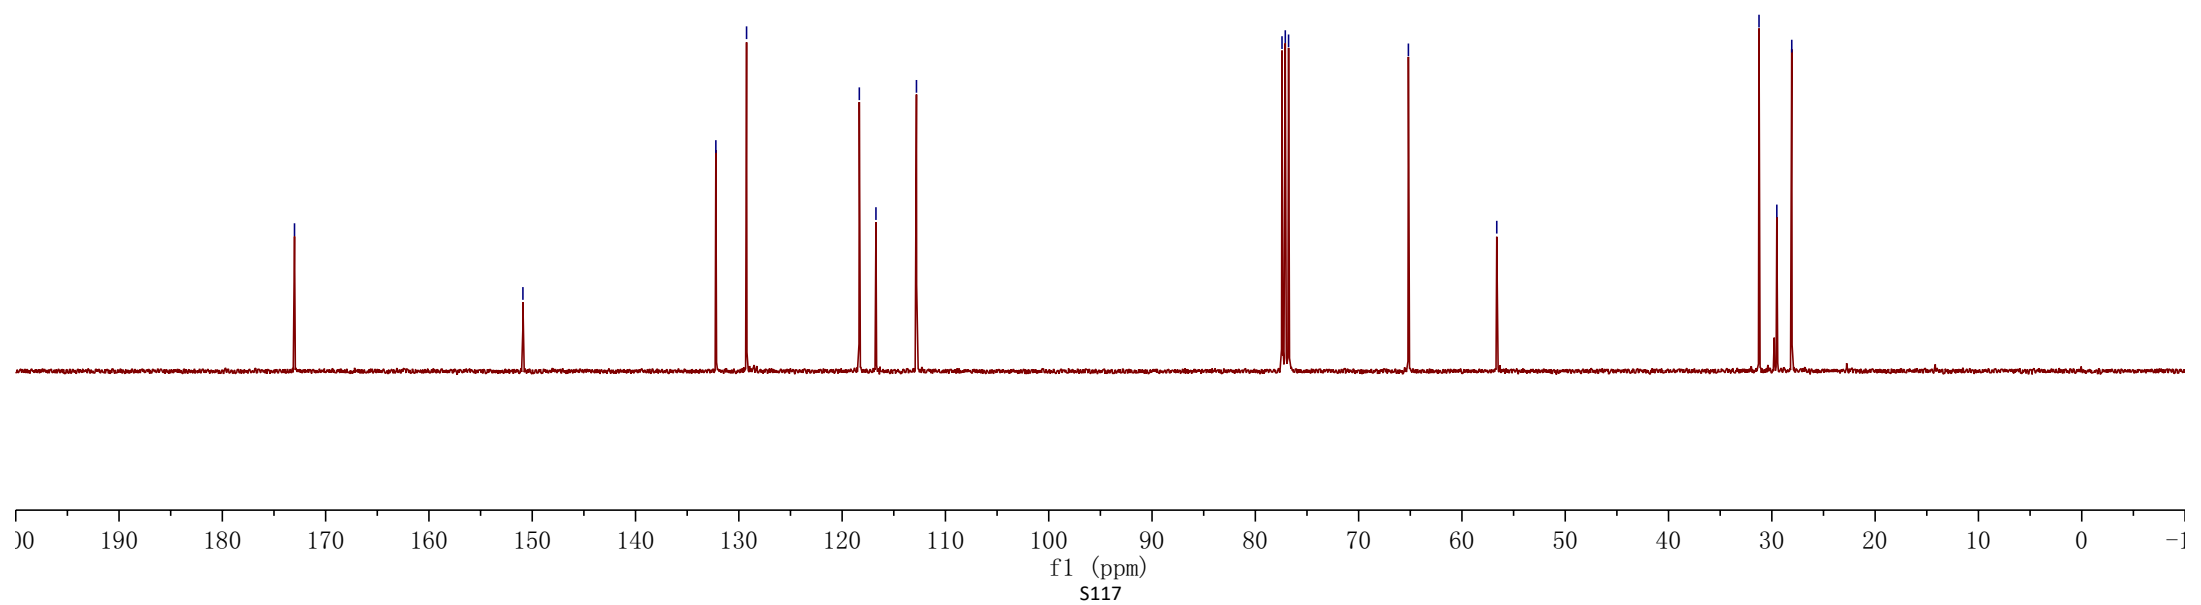

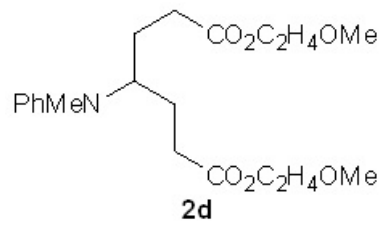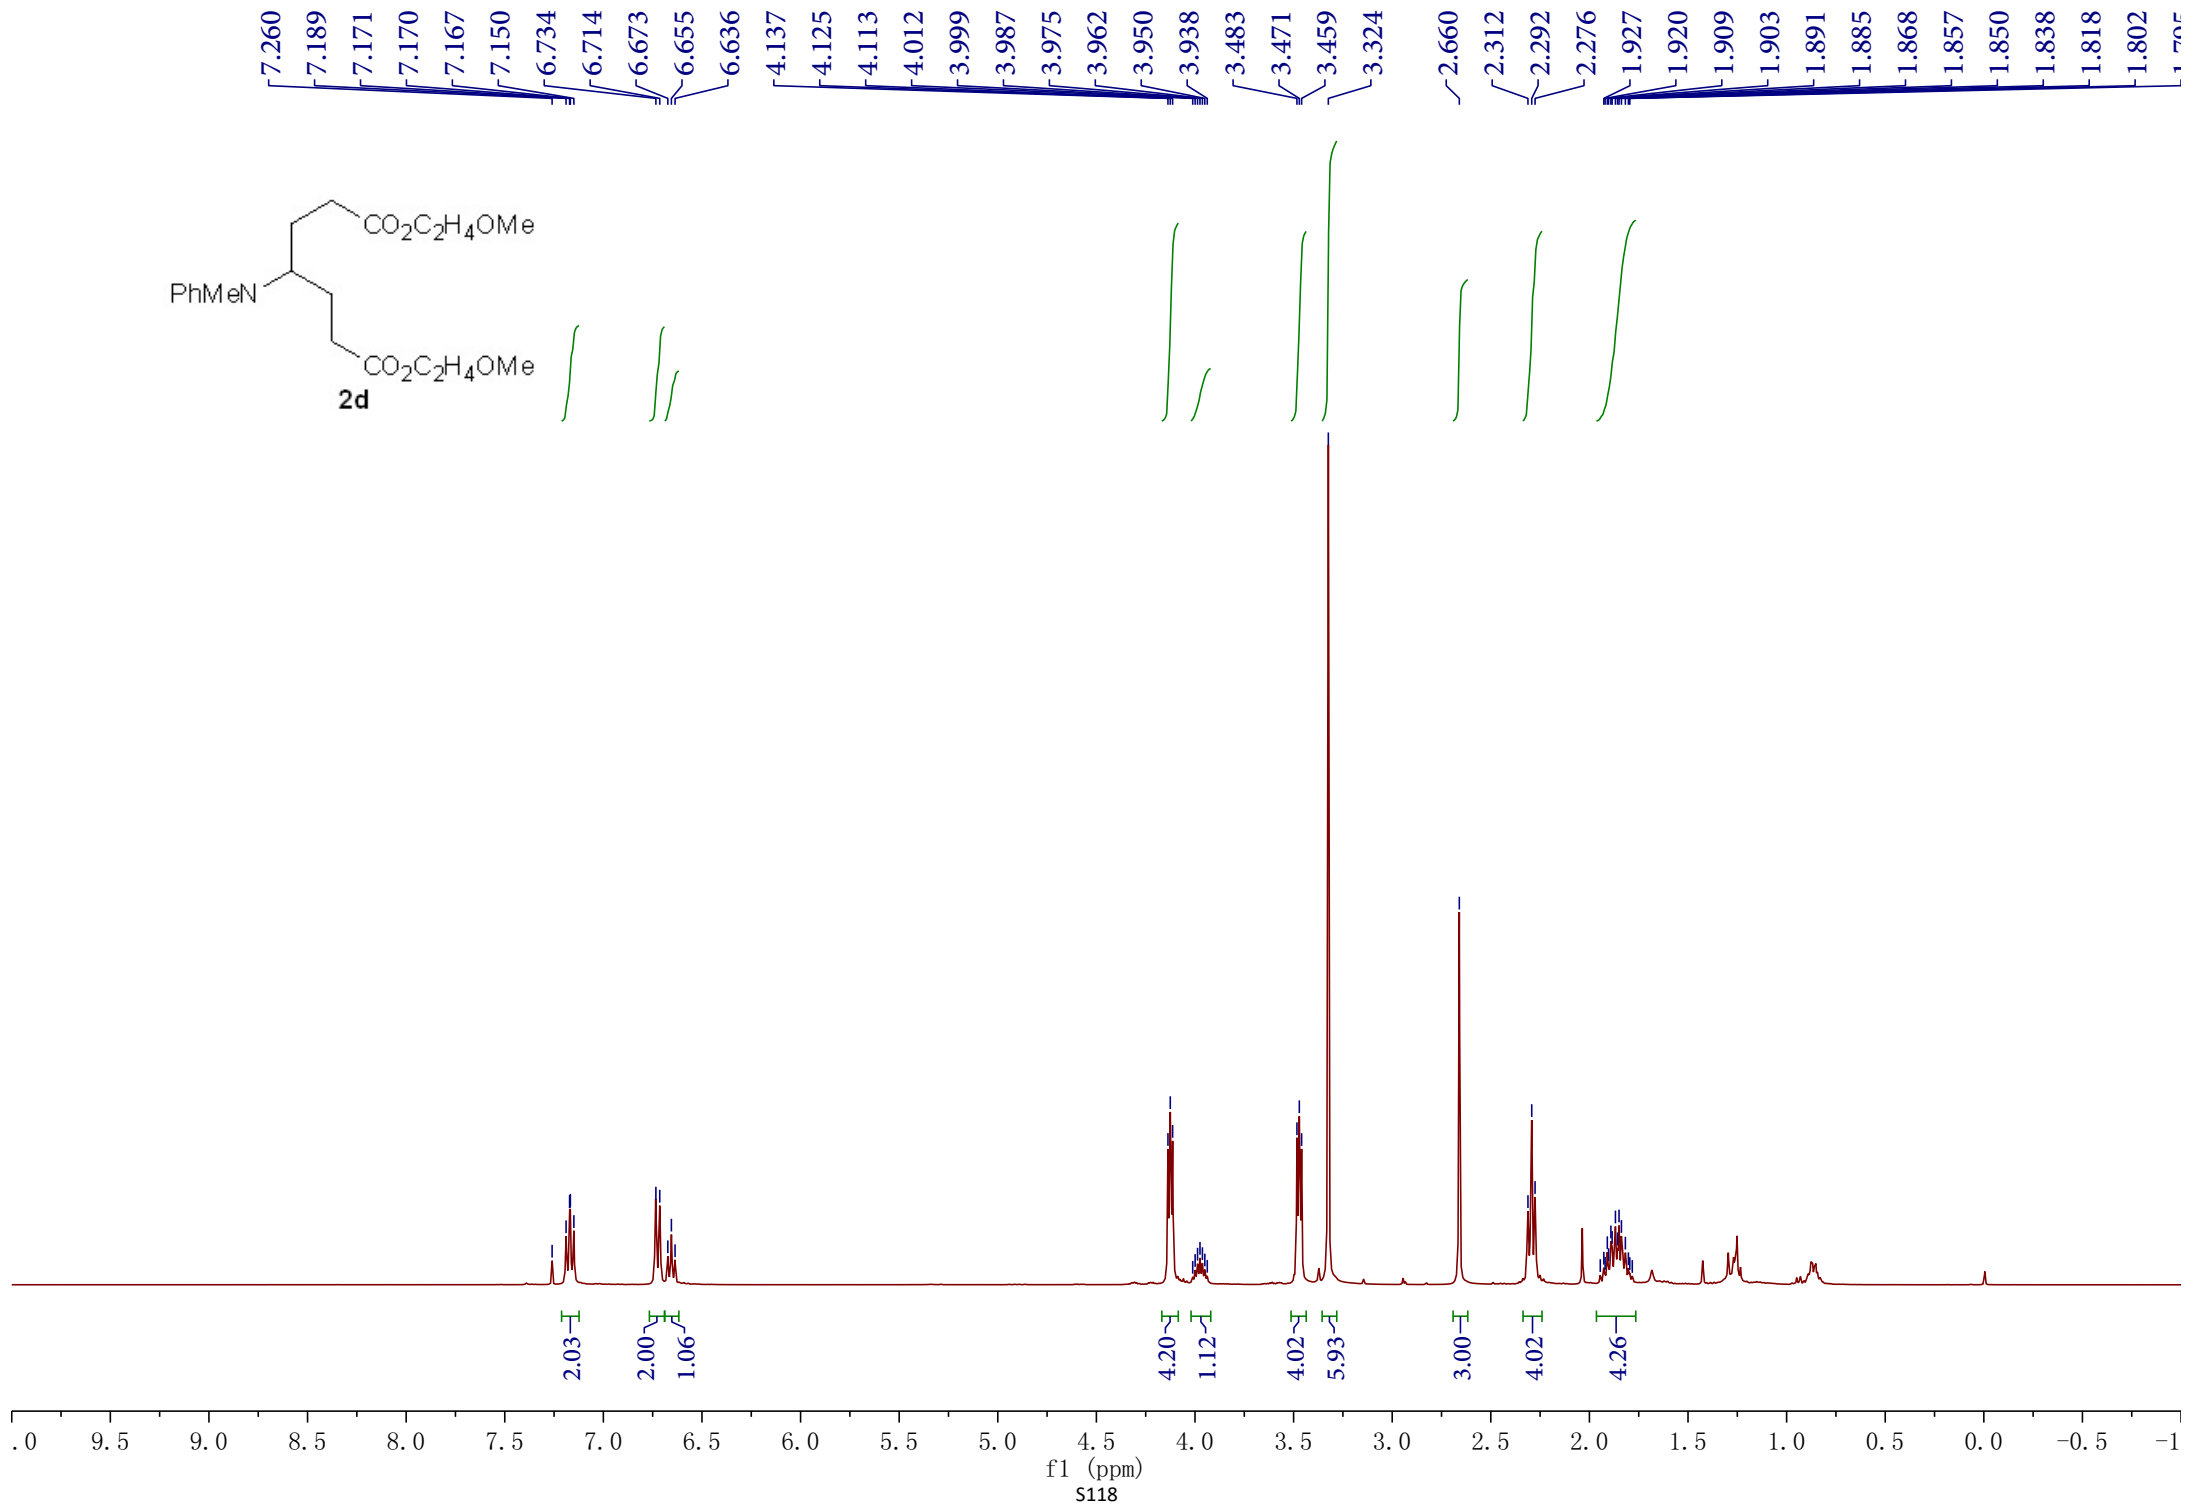

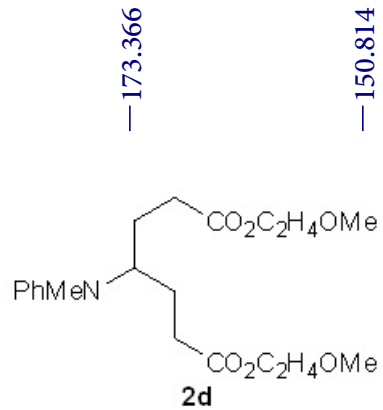

173.366

150.814

129.195

116.580

112.669

77.417

77.100

76.782

70.376

63.434

58.972

56.470

31.155

29.462

28.025

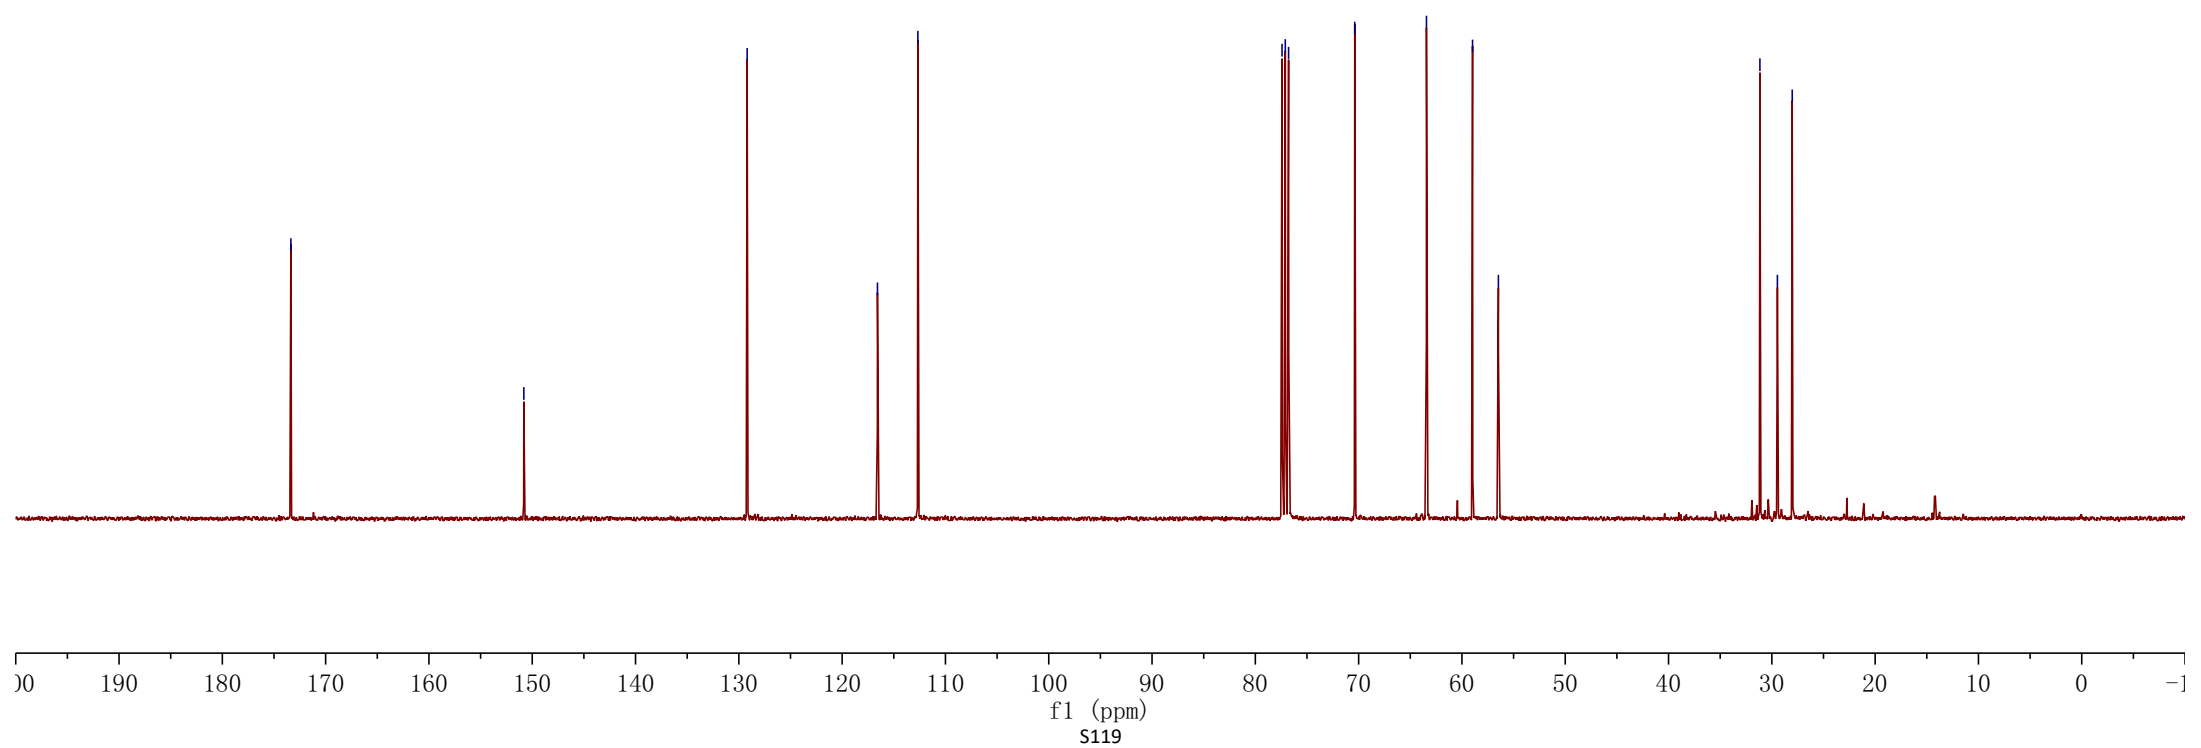

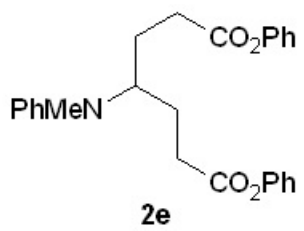

7.339 7.320 7.300 7.256 7.234 7.216 7.202 7.184 7.165 6.934 6.915 6.846 6.825 6.748 6.730 6.712 4.197 4.184 4.172 4.160 4.147 4.135 4.122 2.737 2.555 2.552 2.533 2.519 2.515 2.082 2.065 2.058 2.047 2.029 2.017 2.004 1.966 1.949 1.930

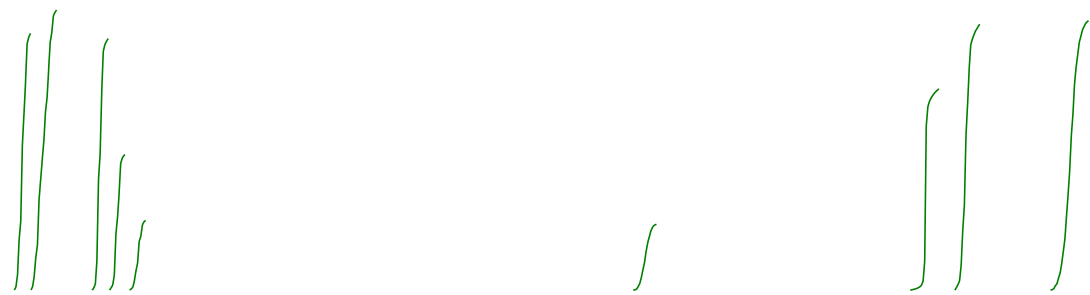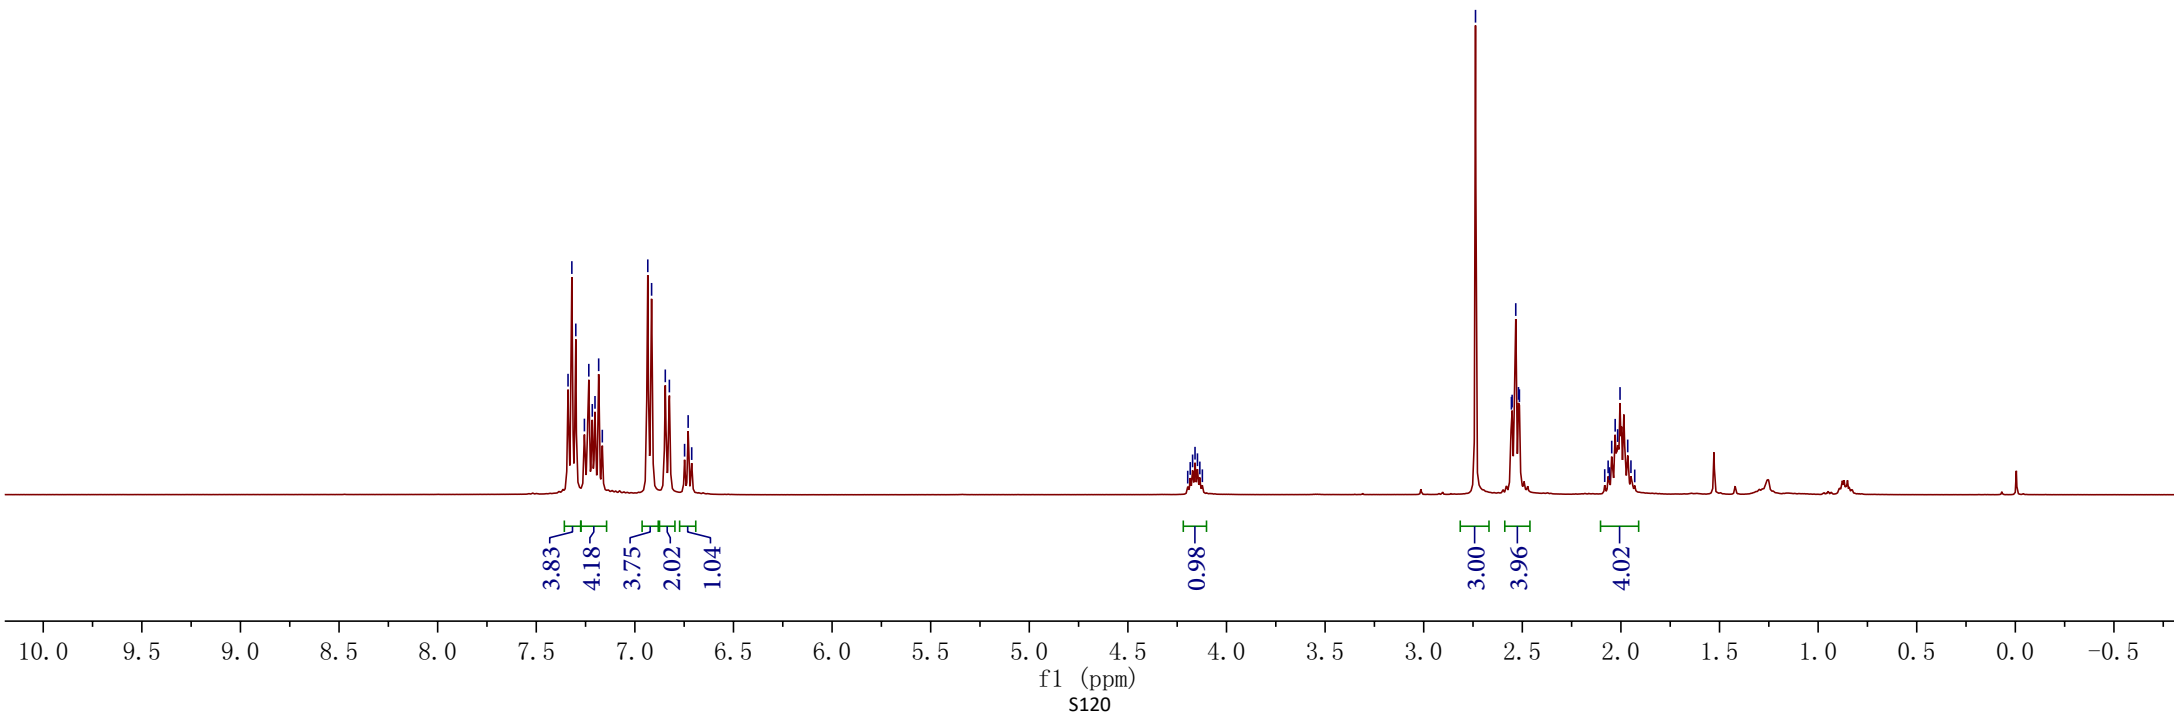



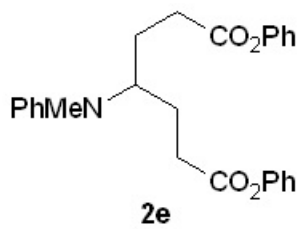

— 171.887

{ 150.944  
— 150.629

{ 129.459  
— 129.404  
— 125.811  
— 121.590  
— 116.995  
— 112.927

{ 77.417  
— 77.099  
— 76.782

— 56.524

{ 31.314  
— 29.591  
— 27.943

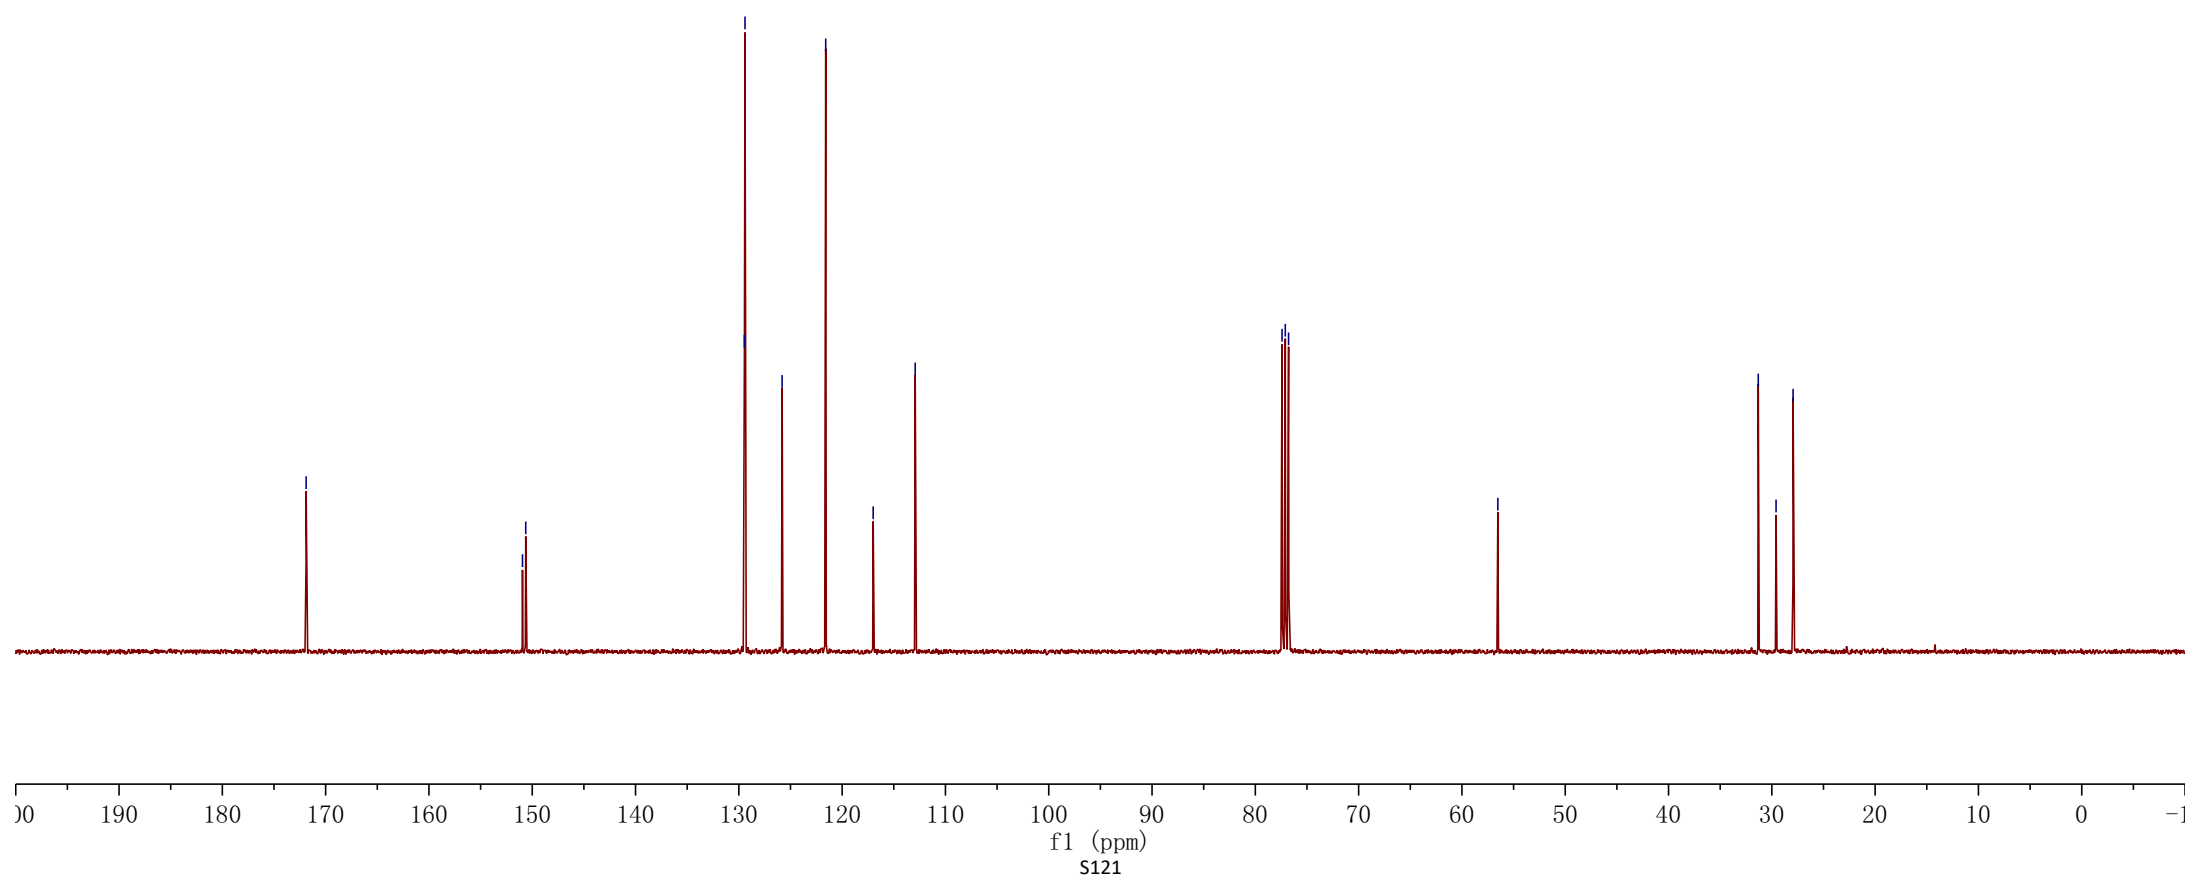

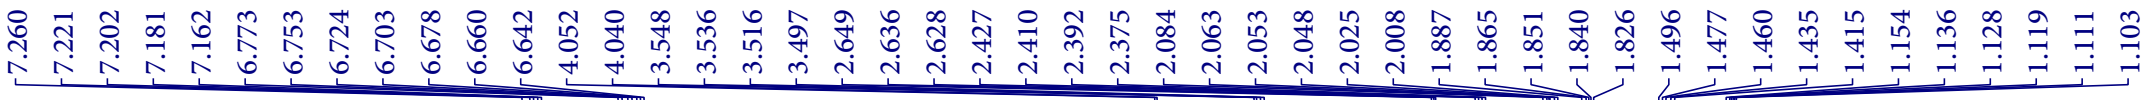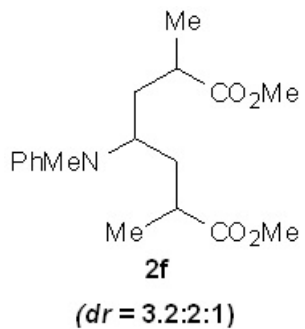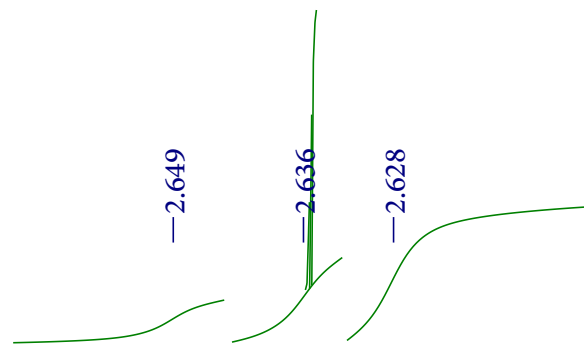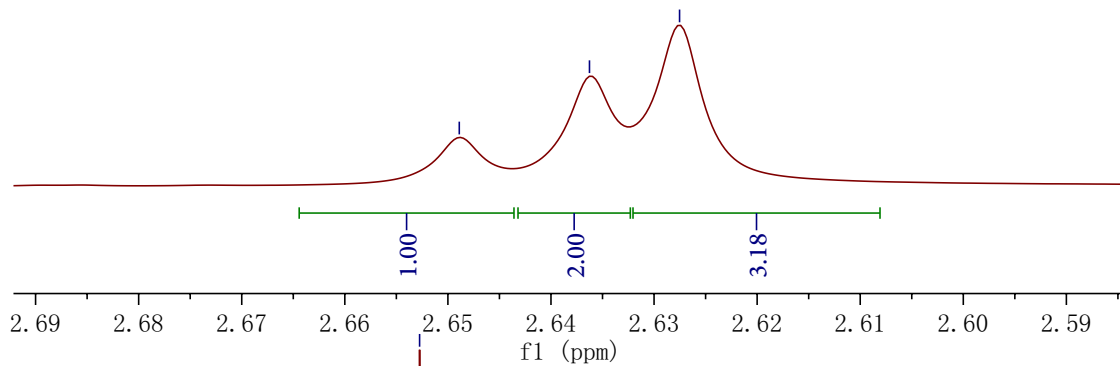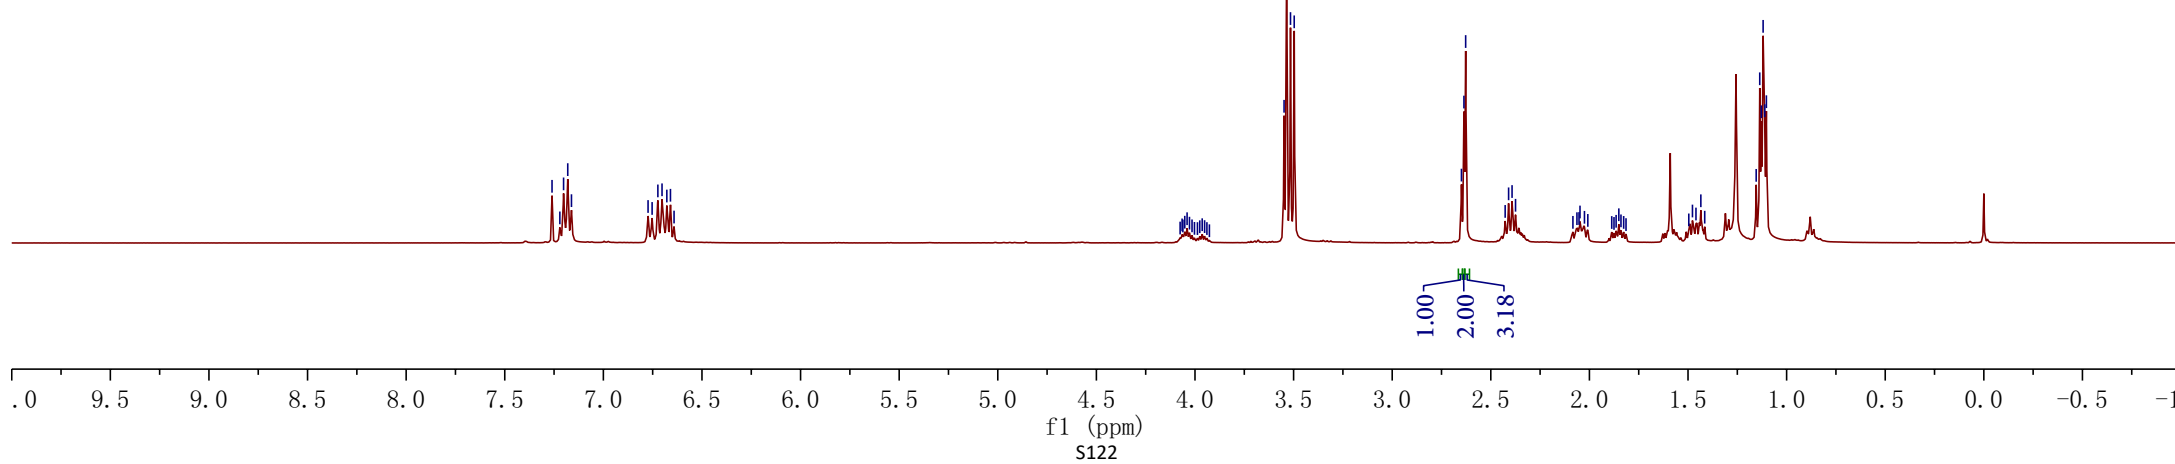

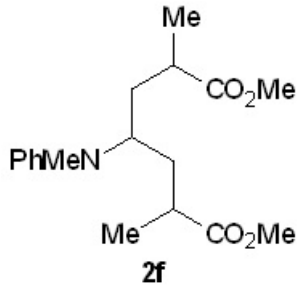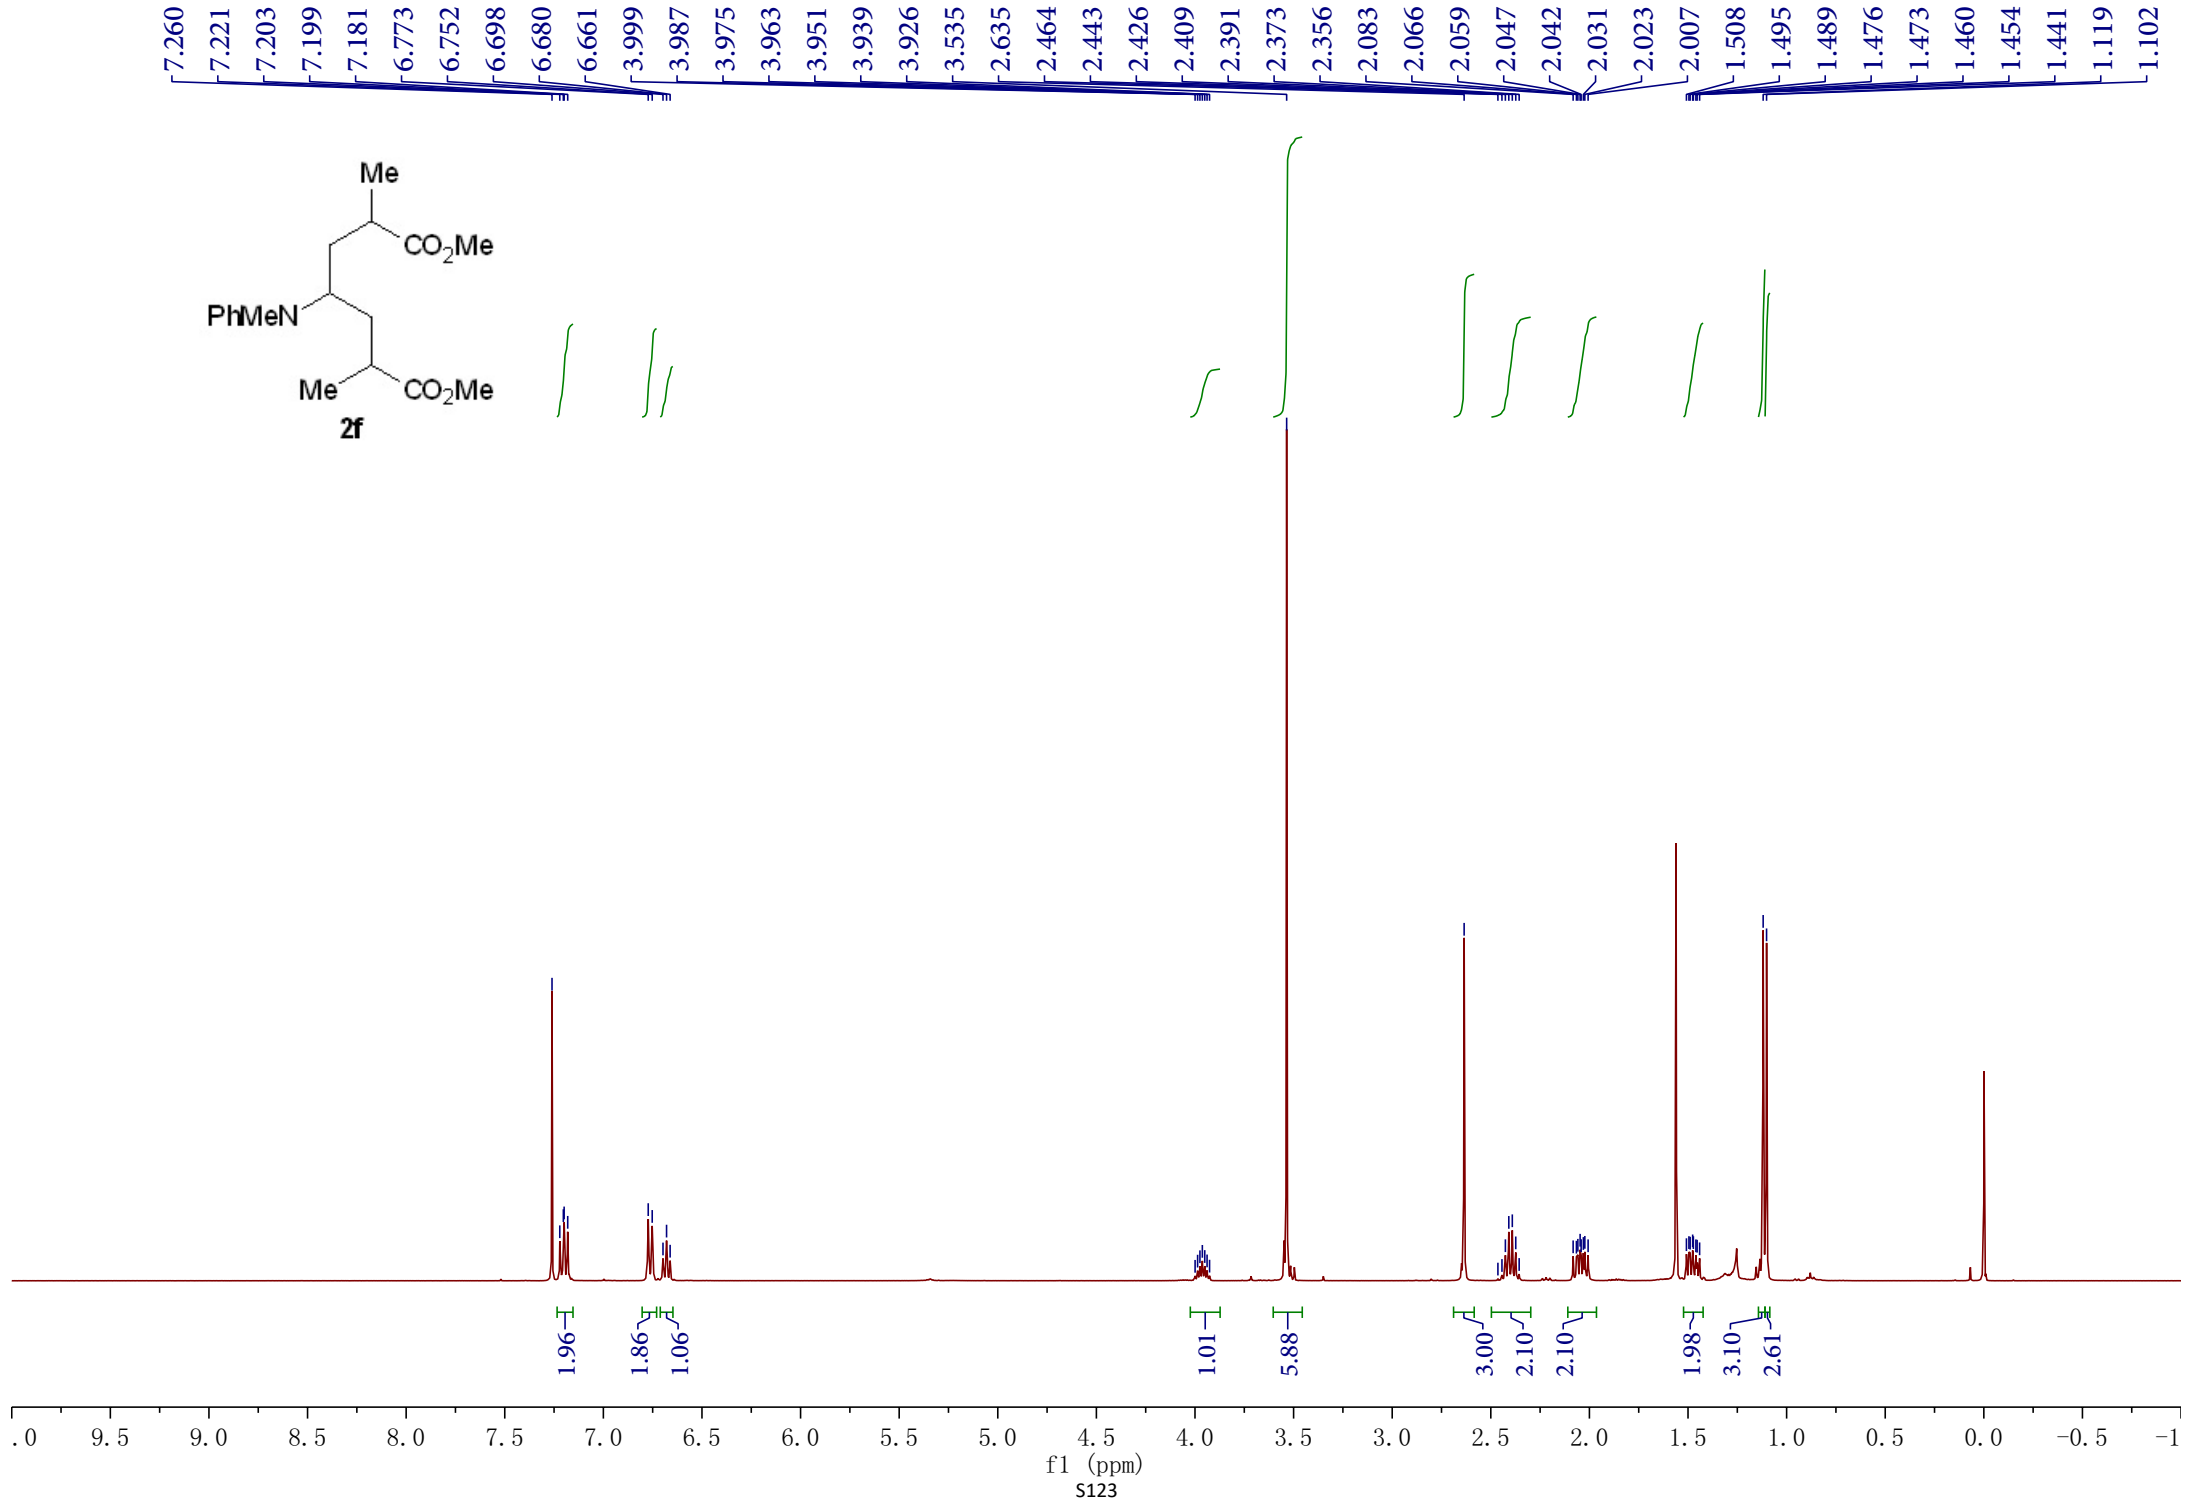

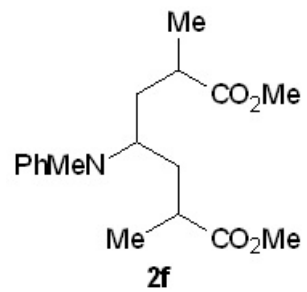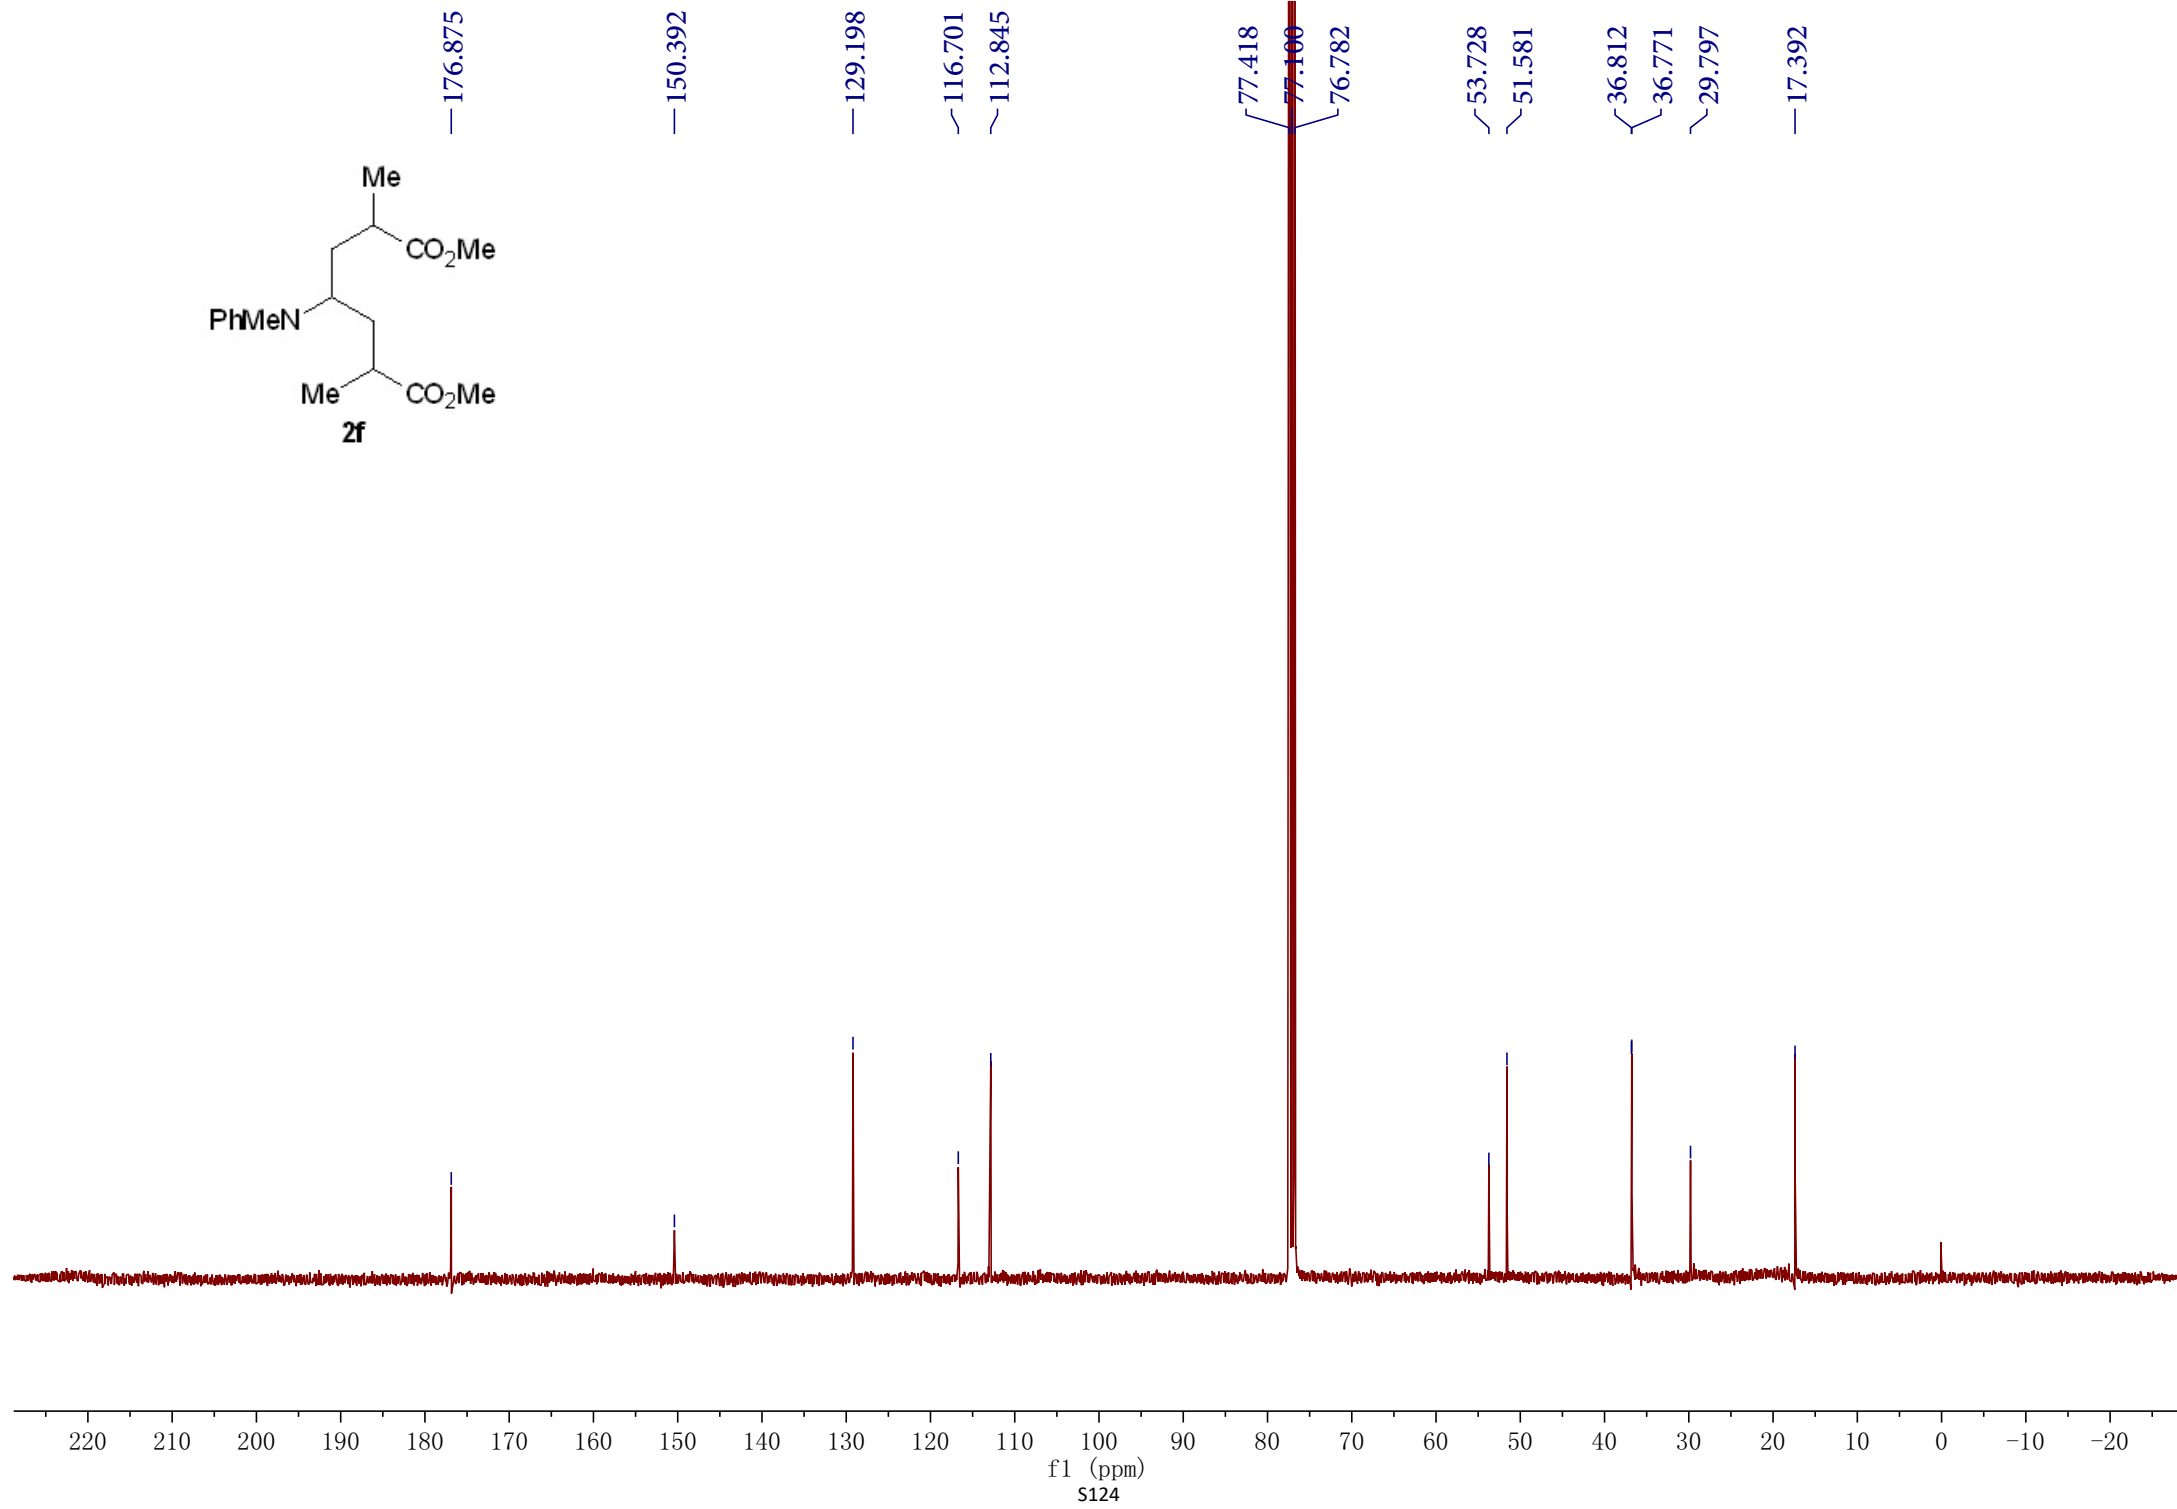

7.308 7.290 7.260 7.248 7.218 7.199 7.179 7.161 7.140 7.121 6.752 6.731 6.721 6.699 6.679 6.662 6.644  
 5.052 5.041 5.036 5.027 5.021 5.011 4.996 4.945 4.923 4.892 4.862 4.846 4.815 2.646 2.619 2.451 2.446 2.434 2.428 2.411 2.093 1.881 1.490 1.447 1.160 1.154 1.142 1.135 1.119 1.103

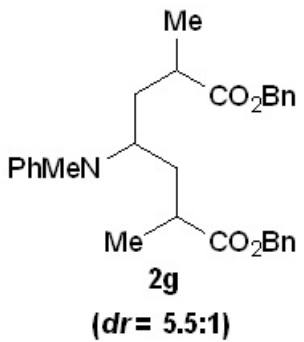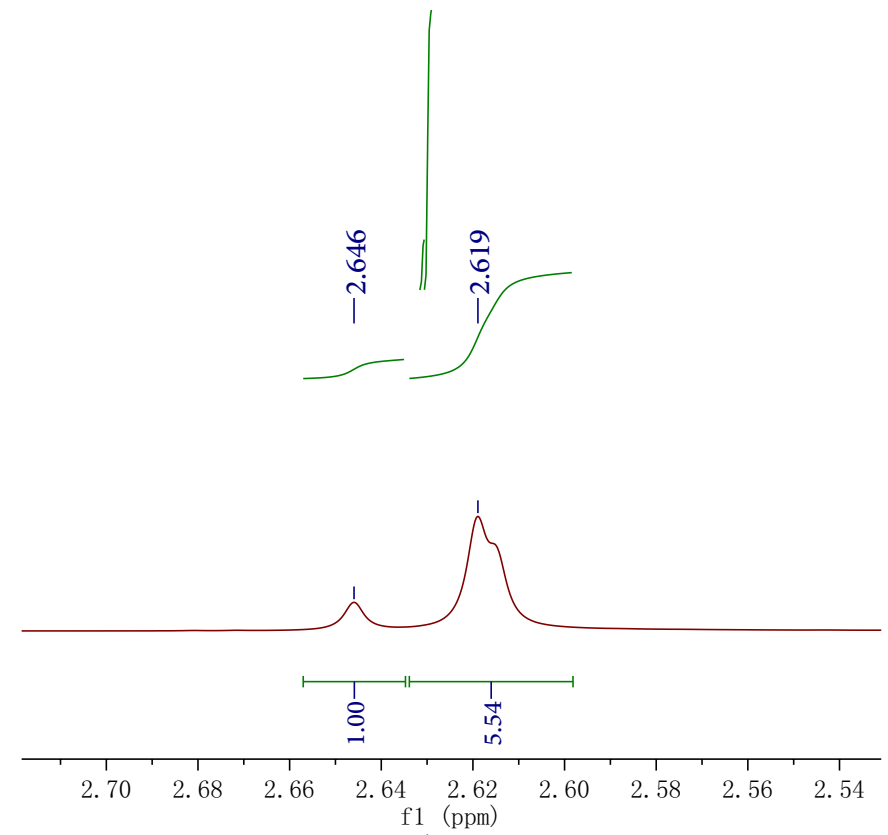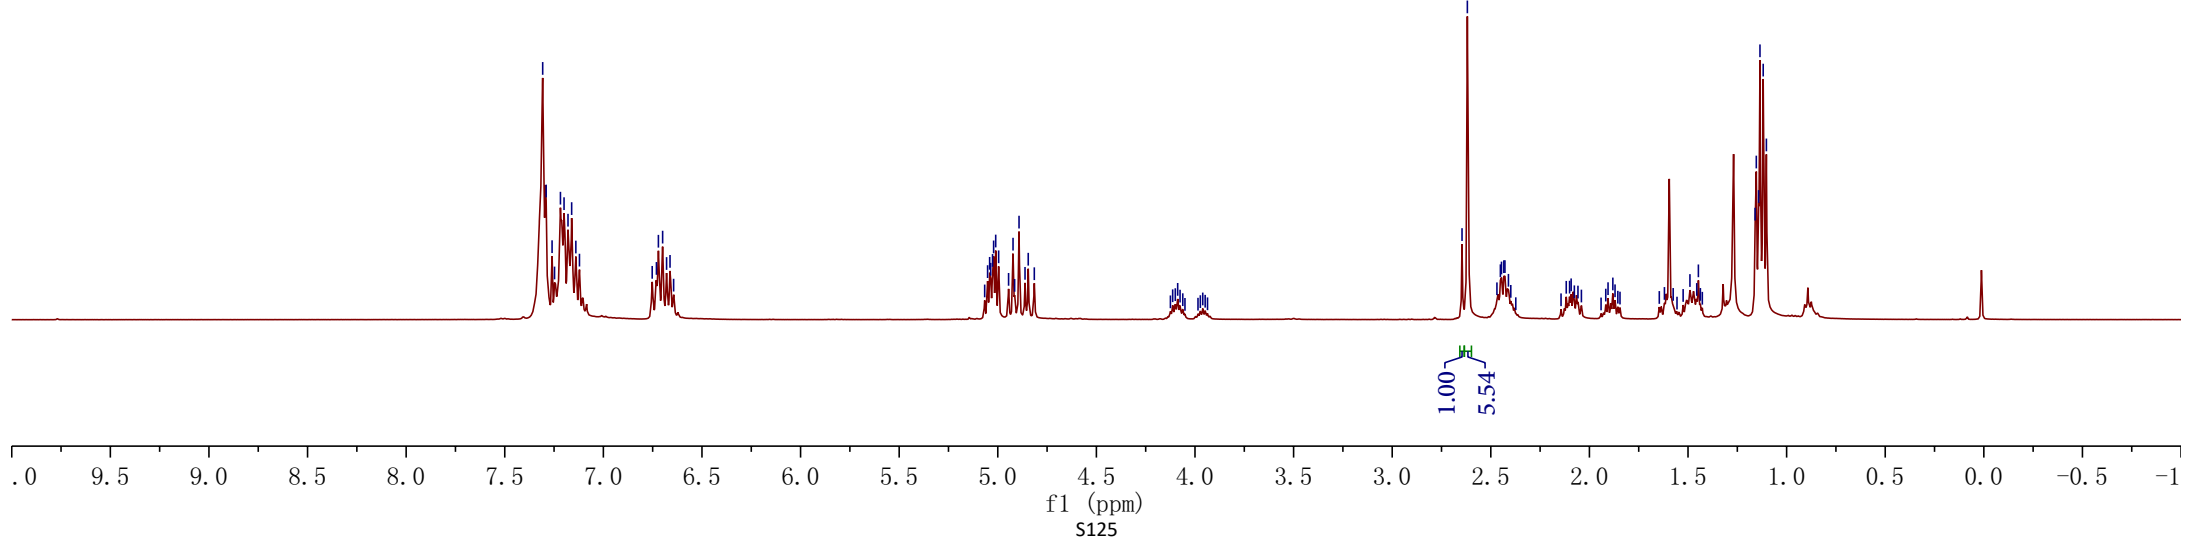

7.326 7.312 7.308 7.293 7.289 7.260 7.243 7.218 7.212 7.199 7.182 7.175 7.160 7.139 7.120 7.103 6.721 6.700 6.679 6.660 6.642 5.067 5.053 5.036 5.027 5.022 4.997 4.946 4.916 4.895 4.864 4.849 4.818 4.087 2.646 2.620 2.469 2.451 2.434 2.409 1.870 1.610 1.159 1.154 1.141 1.135 1.117

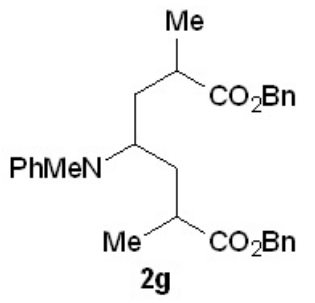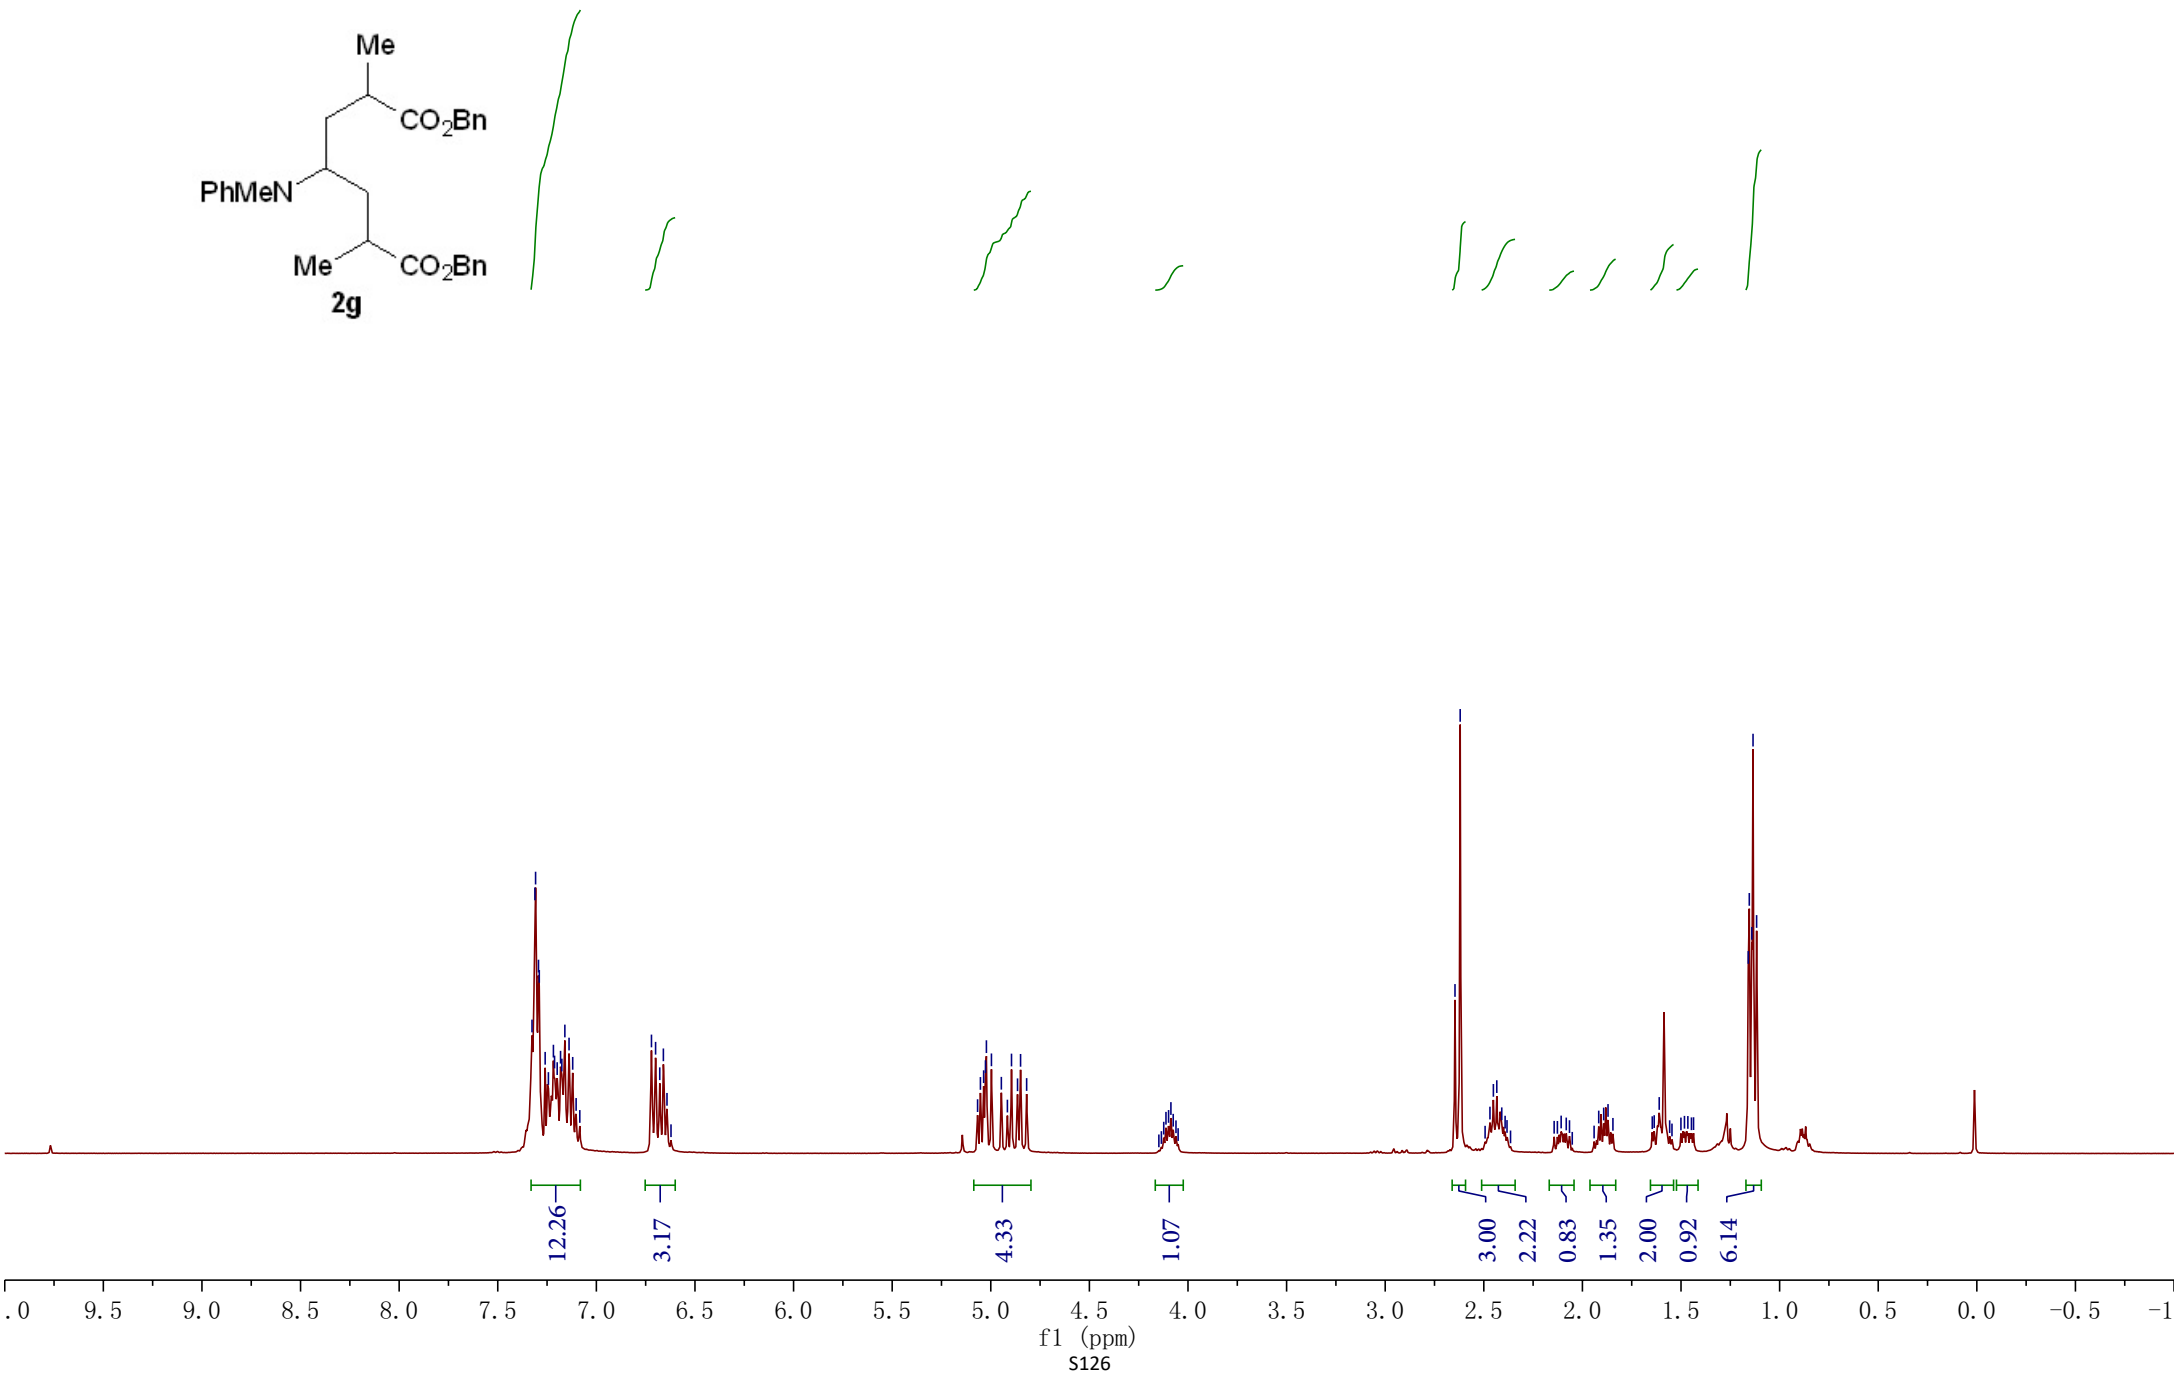

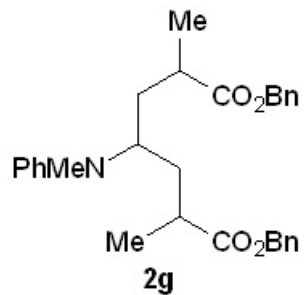

176.330  
176.265  
176.251

150.582

136.053  
136.034  
135.967  
129.210  
129.154  
128.534  
128.495  
128.333  
128.306  
128.192  
128.157  
128.082  
116.654  
116.627  
112.817  
112.748  
77.417  
77.100  
76.782  
66.328  
66.223  
54.181  
37.154  
37.071  
36.973  
36.530  
36.396  
36.318  
29.745  
18.561  
18.186  
17.572

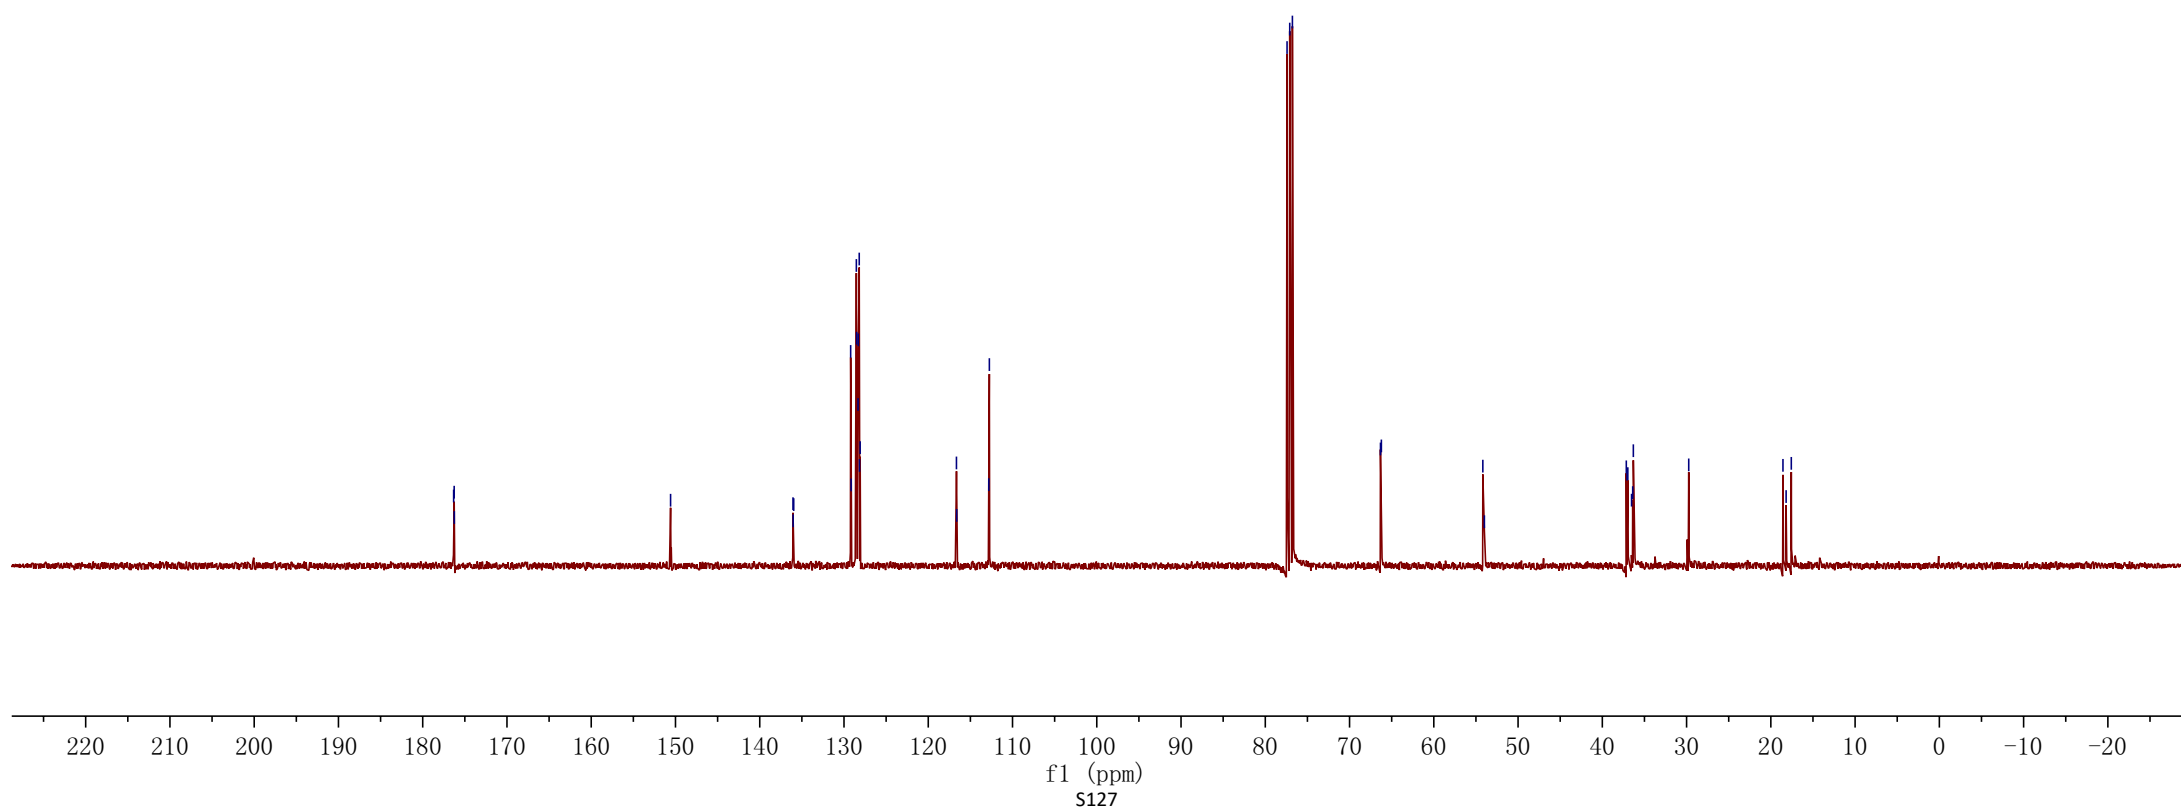

7.348 7.329 7.310 7.299 7.280 7.267 7.260 7.222 7.181 7.169 7.146 7.123 7.116 6.746 6.728 6.725 6.722 6.713 6.710 6.707 6.592 6.589 6.570 6.567 6.534 6.531 6.512 6.509 6.450 6.447 6.443 6.430 6.427 6.425 3.612 3.591 3.560 3.530 3.512 3.509 3.452 2.780 2.750 2.677 2.780 2.750 2.677 2.780 2.750 2.677 2.407

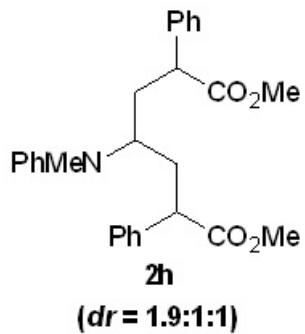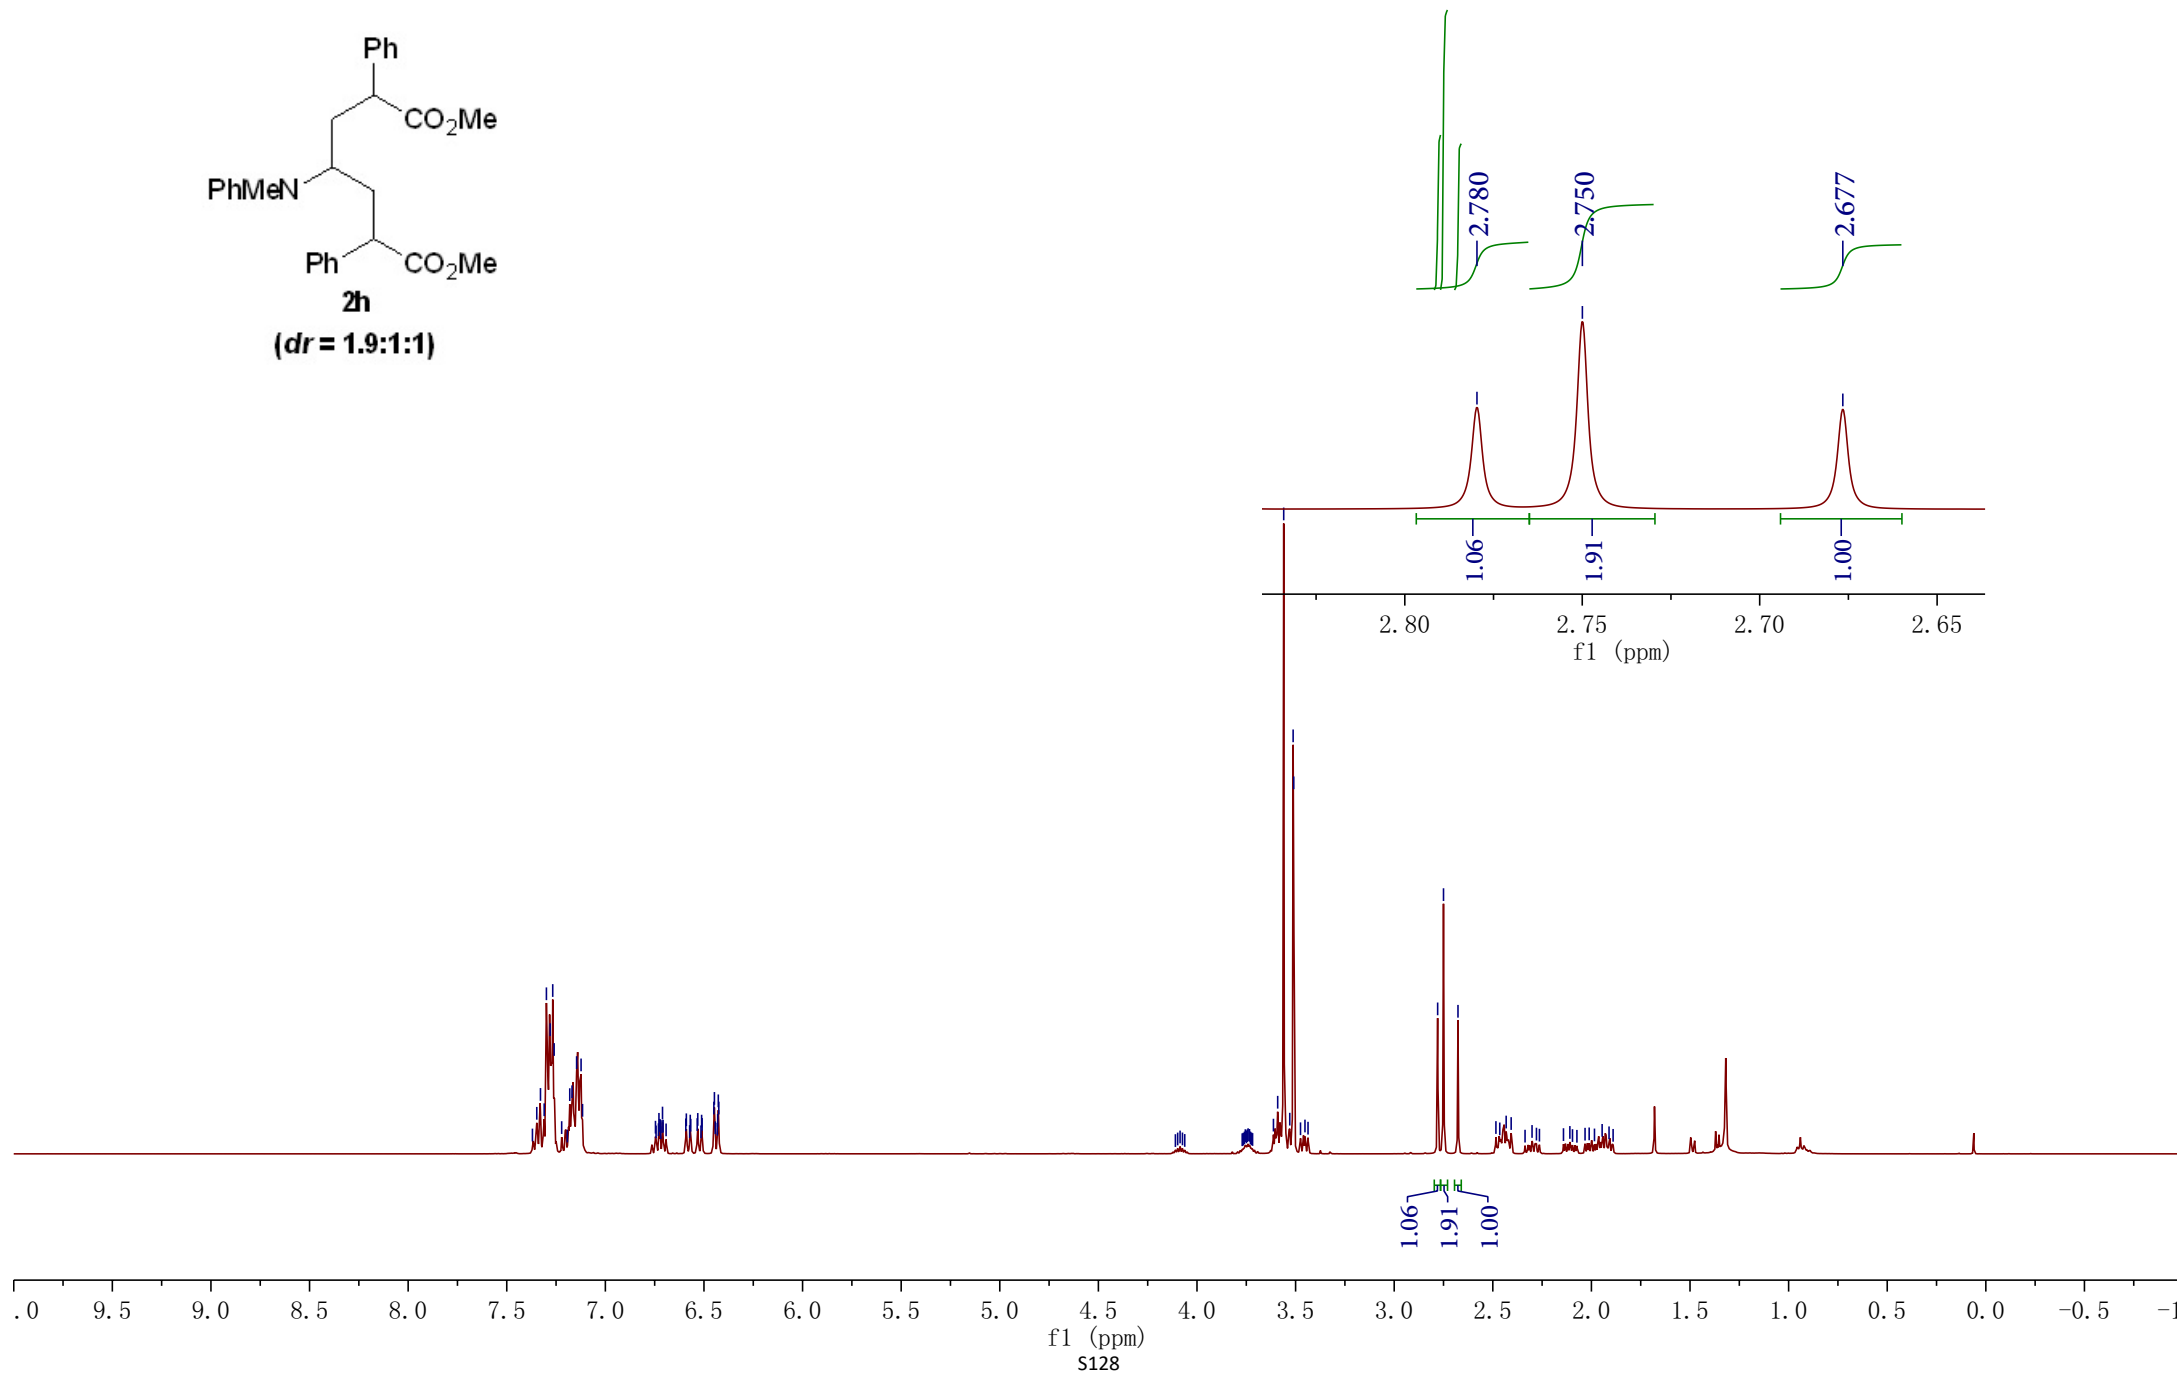



7.318 7.313 7.297 7.294 7.279 7.260 7.244 7.239 7.227 7.223 7.166 7.148 7.144 7.126 6.685 6.667 6.649 6.532 6.512 4.049 4.037 4.025 4.013 4.002 3.989 3.547 3.534 3.522 3.511 2.622 2.419 2.407 2.395 2.383 2.371 2.359 2.347 1.910 1.897 1.886 1.874 1.862 1.851 1.838

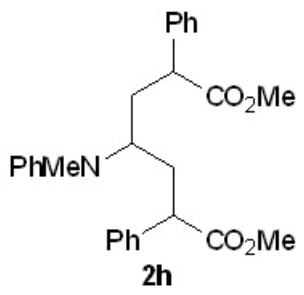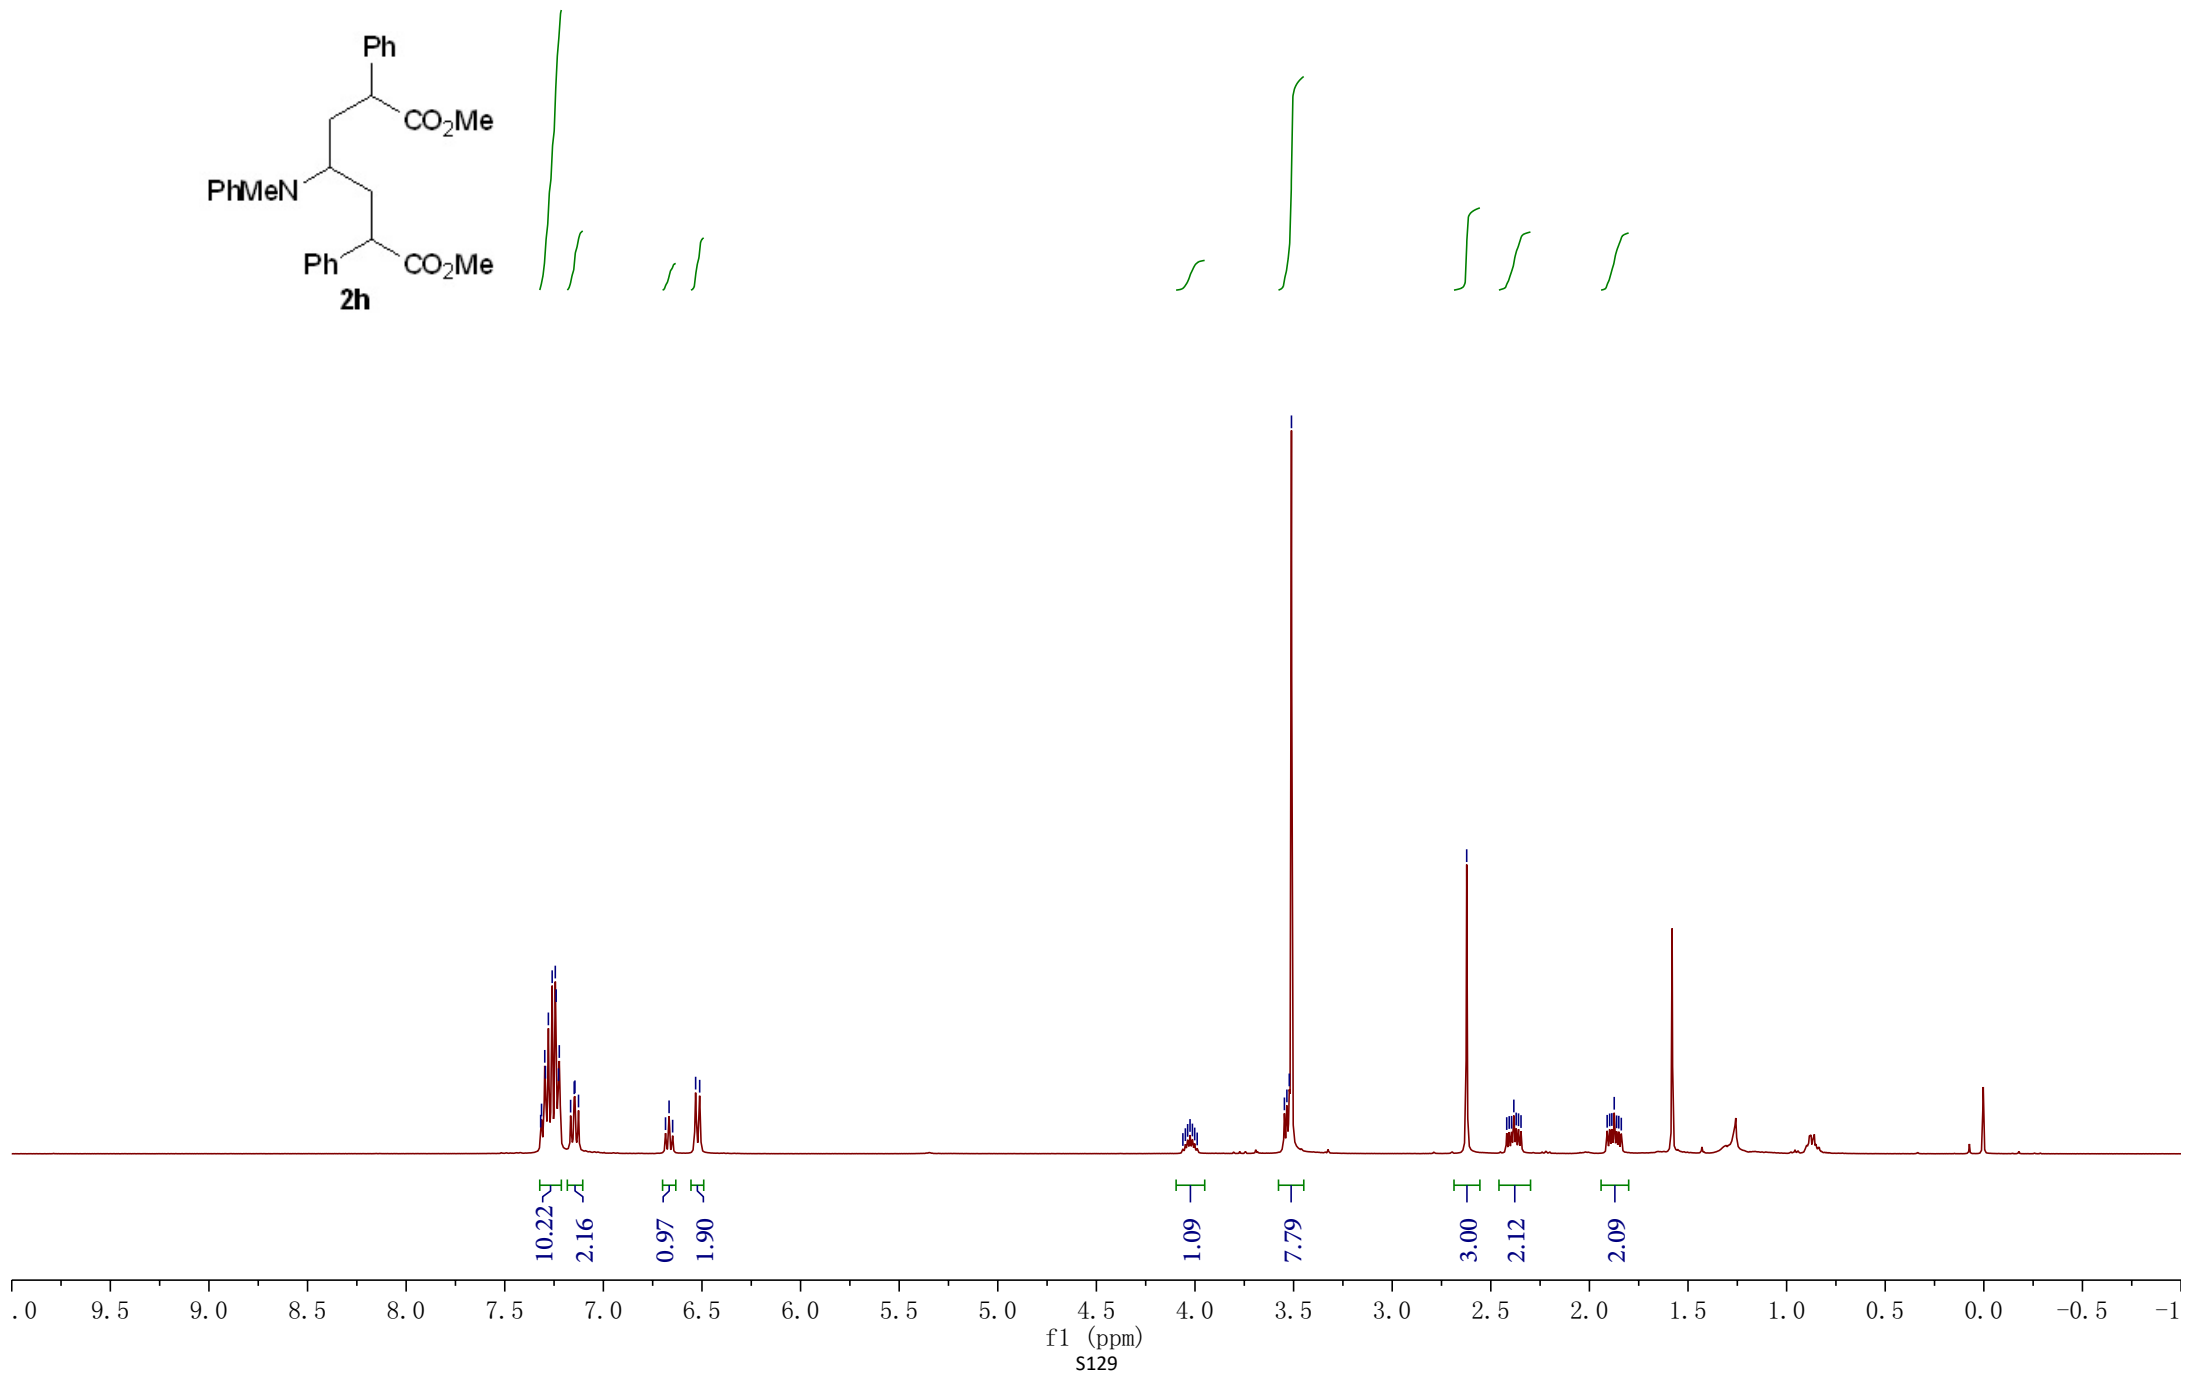

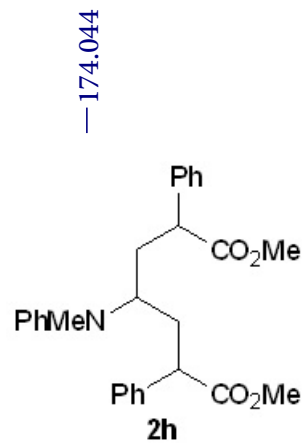

—174.044

—150.432

—139.312

129.136

128.790

127.841

127.380

—116.787

—112.809

77.417

77.100

76.782

54.060

52.046

48.219

—37.182

—29.835

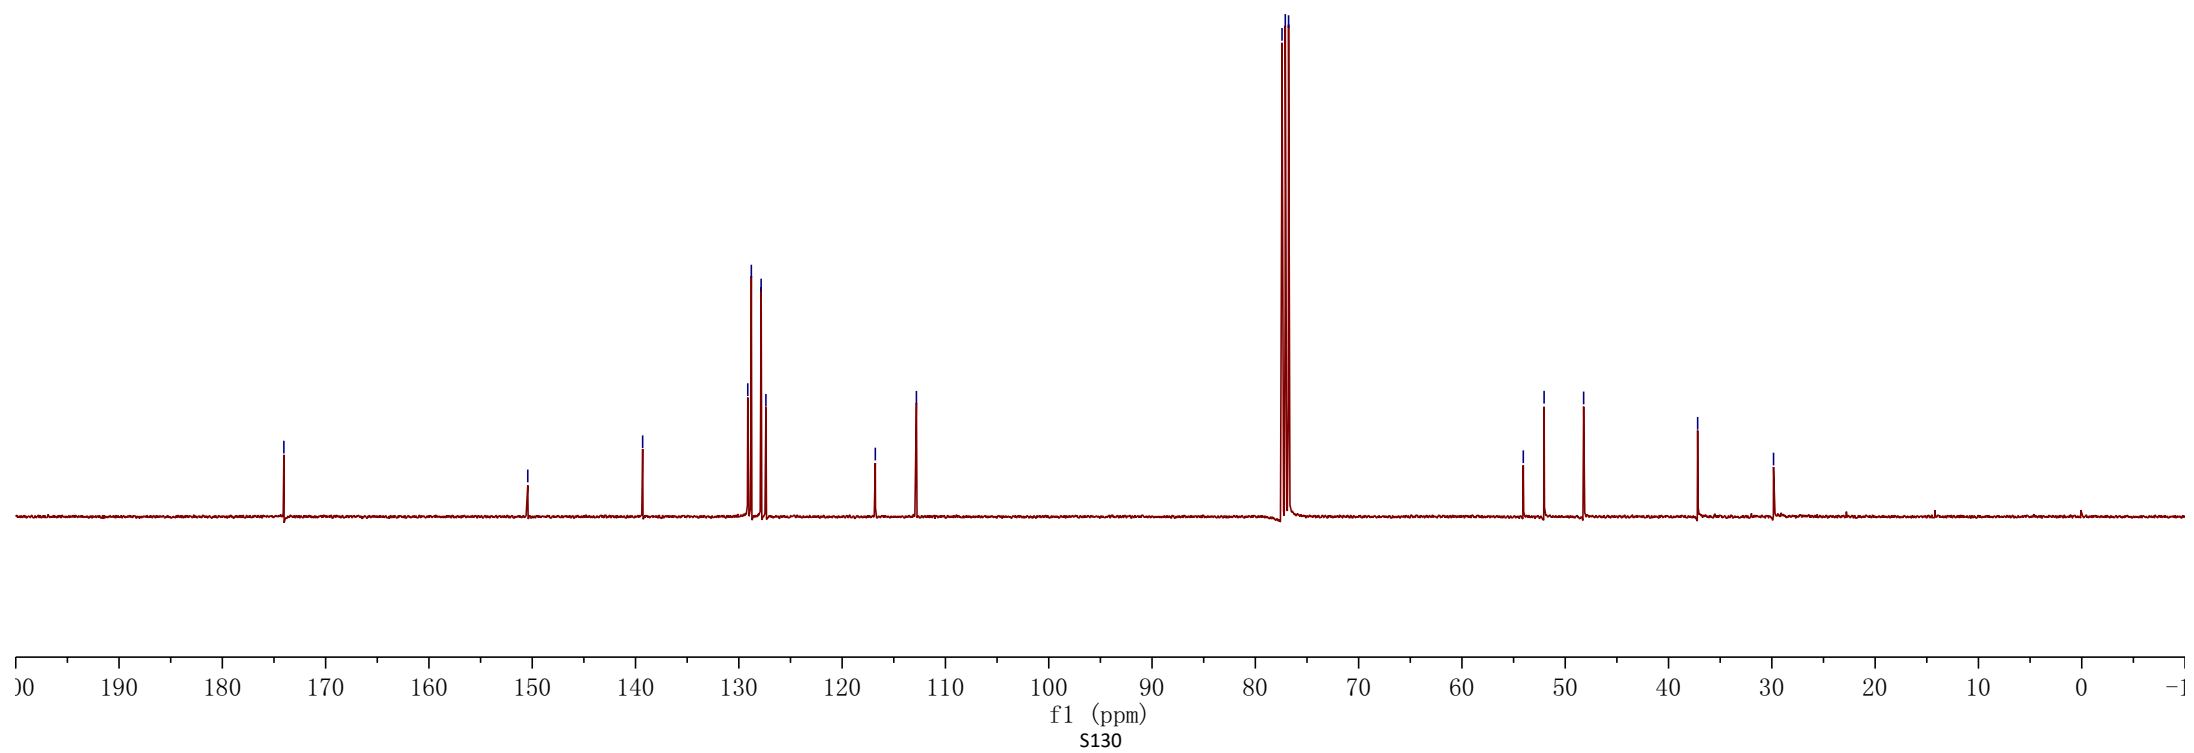

7.260 7.247 7.229 7.215 7.207 6.890 6.869 6.817 6.796 6.743 6.733 6.725 6.715 6.697 4.315 4.293 4.270 4.239 4.123 4.101 4.082 4.067 4.059 4.008 3.989 2.764 2.743 2.700 2.559 2.530 2.452 2.362 2.334 2.306 2.273 2.261 2.008 1.991 1.961 1.930 1.912 1.896 1.865 1.839 1.581 1.427 1.307

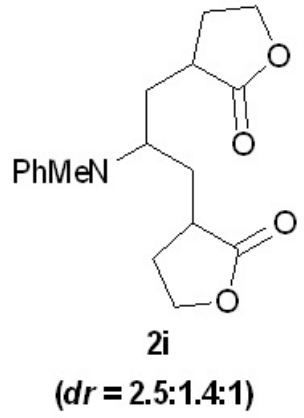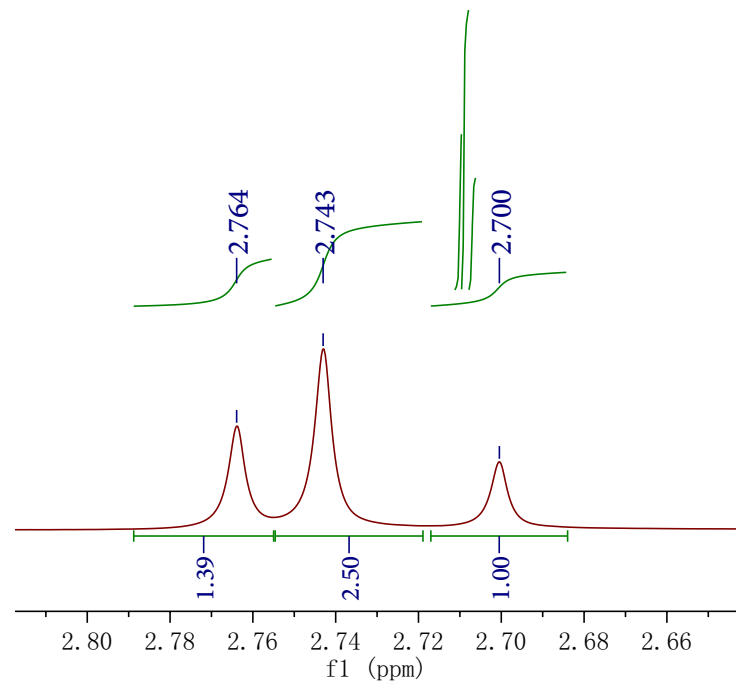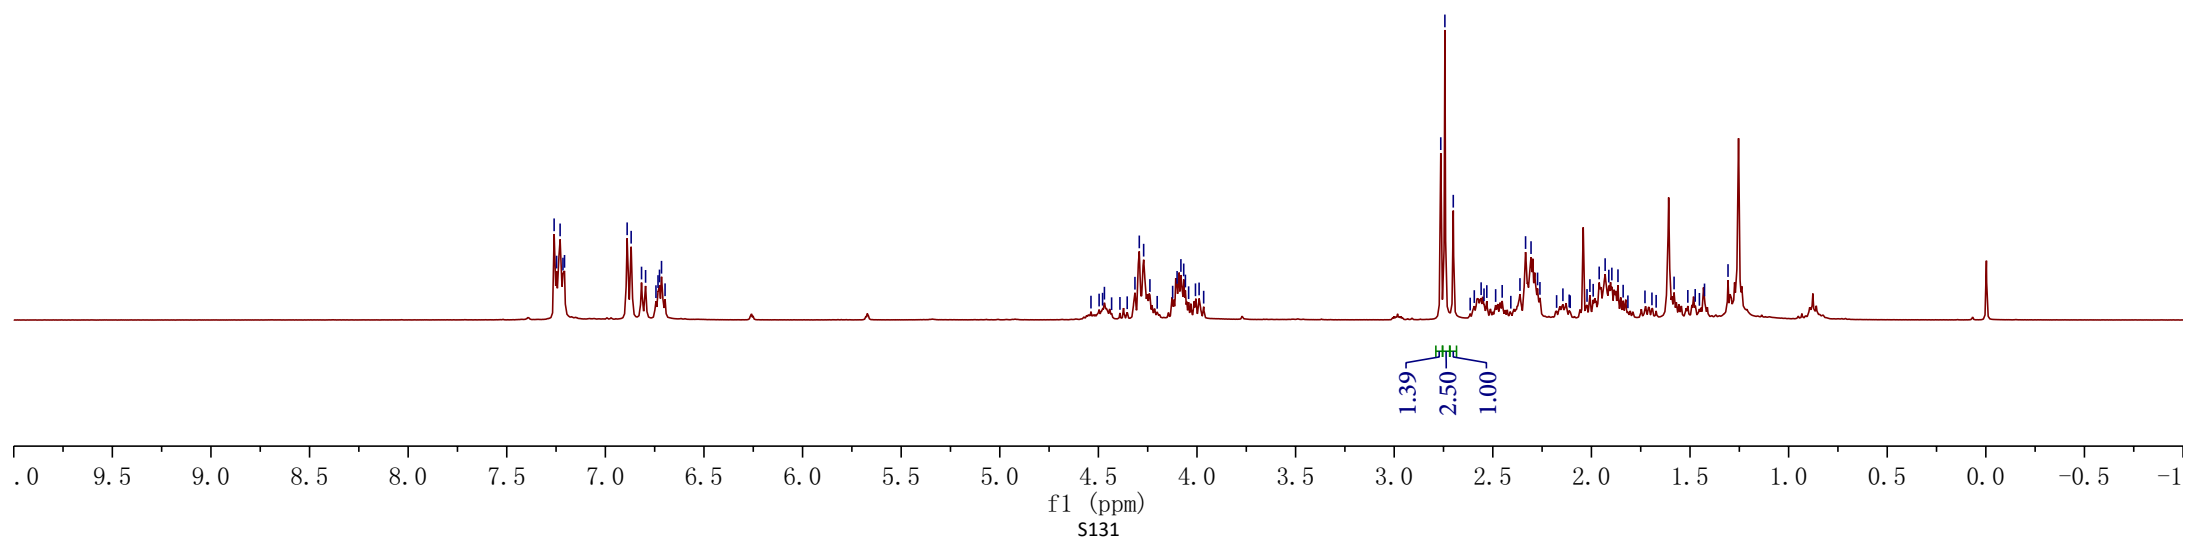

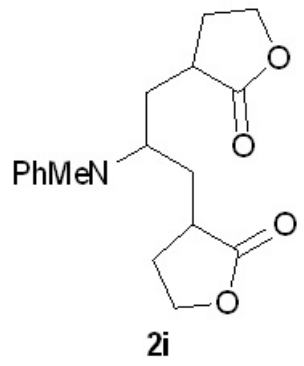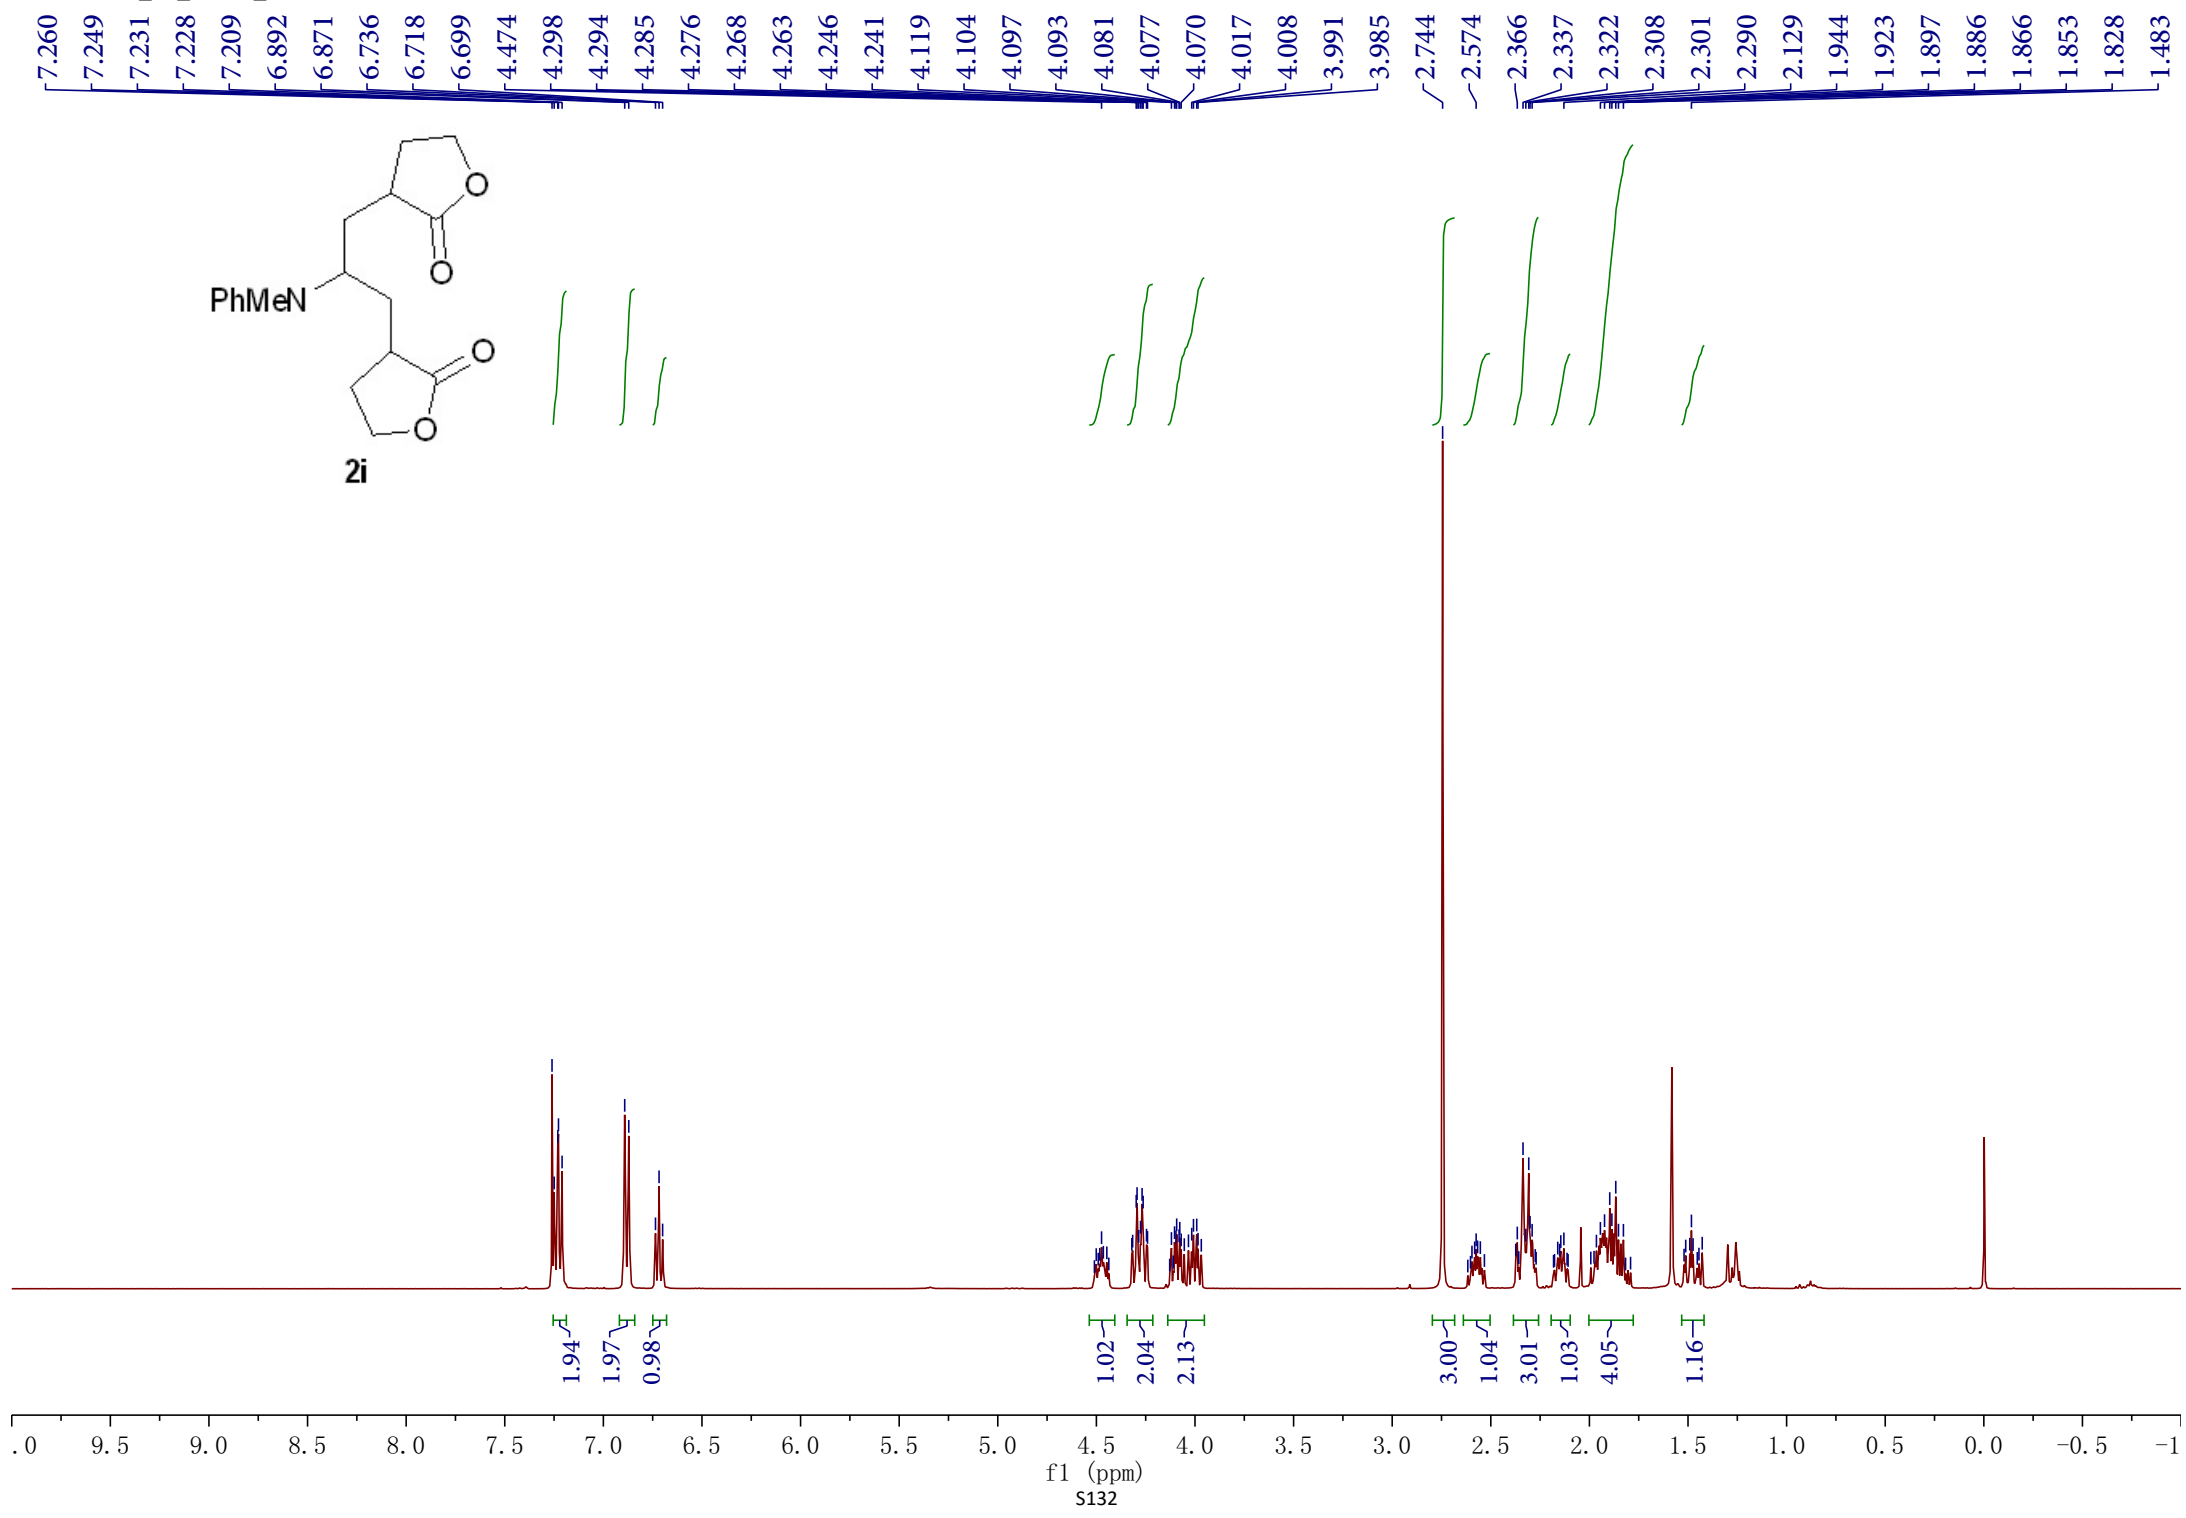

179.669  
179.437

150.623

129.654

117.223

112.593

77.417

77.100

76.782

66.549

53.899

36.794

36.150

34.625

34.049

29.841

29.504

29.187

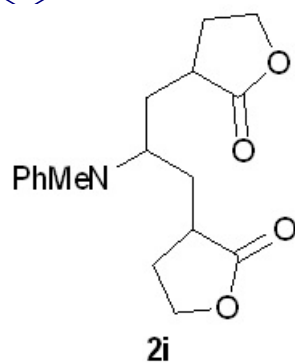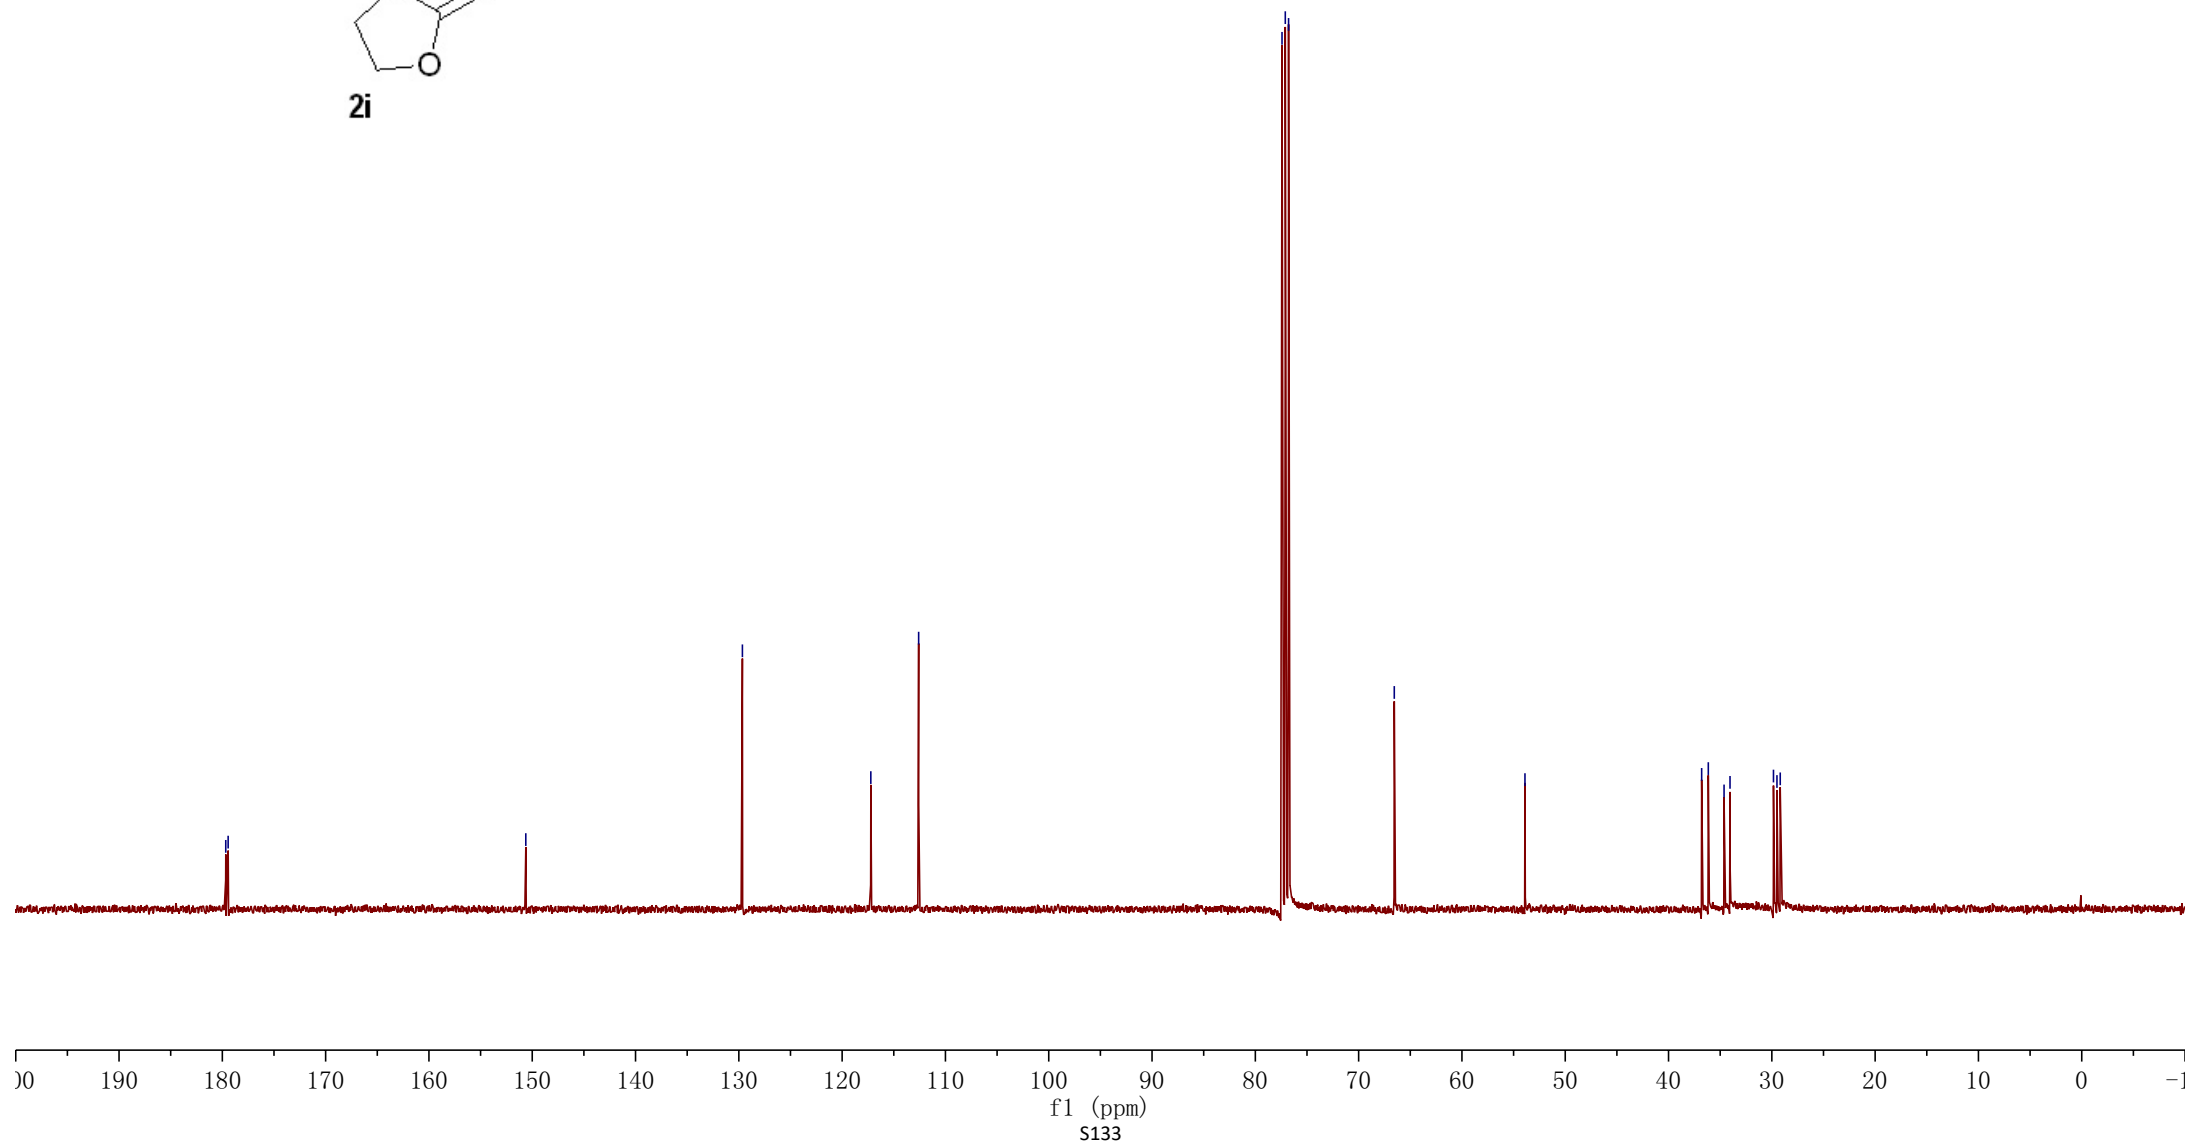

7.286 7.267 7.264 7.260 7.246 6.880 6.859 6.814 6.796 6.777 4.099 4.088 4.073 4.062 4.050 4.036 4.025 4.025 2.714 2.362 2.347 2.343 2.320 2.310 2.305 2.300 2.291 2.285 2.273 2.249 2.230 2.047 2.029 2.011 1.994 1.985 1.978 1.968 1.952 1.918 1.907 1.898 1.887 1.863 1.851 1.843 1.832

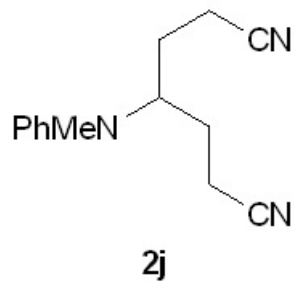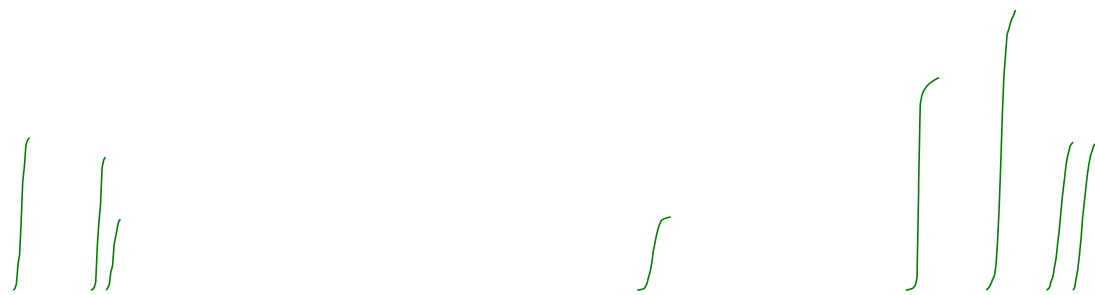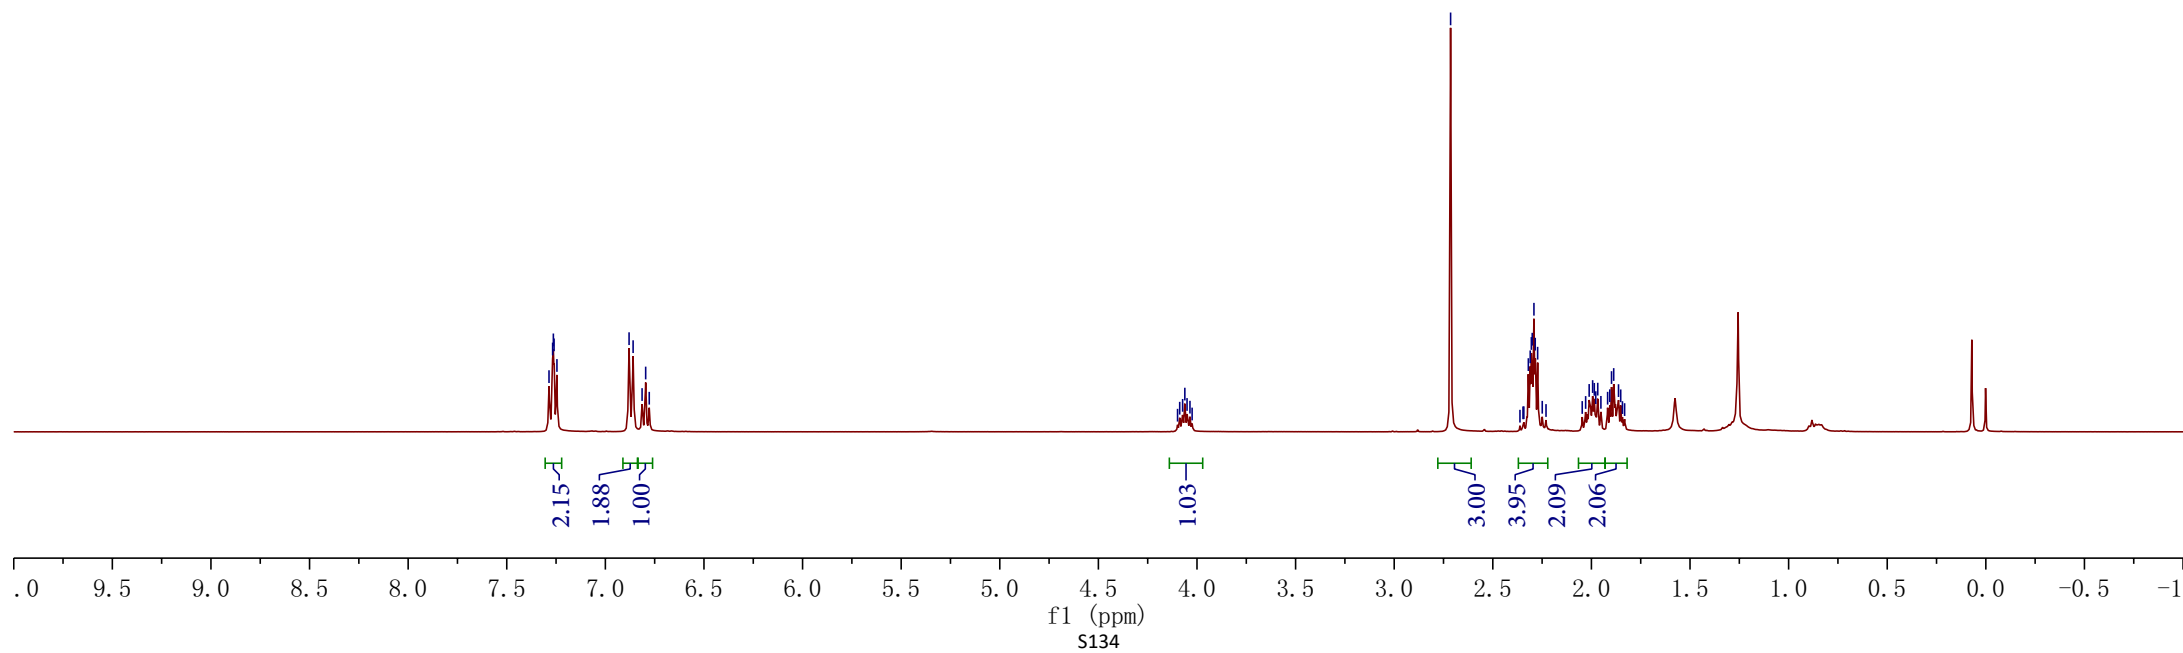

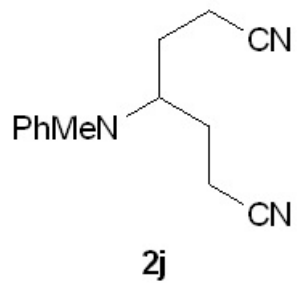

— 150.136

— 129.708

{ 119.174

{ 118.462

{ 113.590

{ 77.417

{ 77.100

{ 76.782

— 56.666

{ 29.770

{ 29.740

{ 28.670

— 14.614

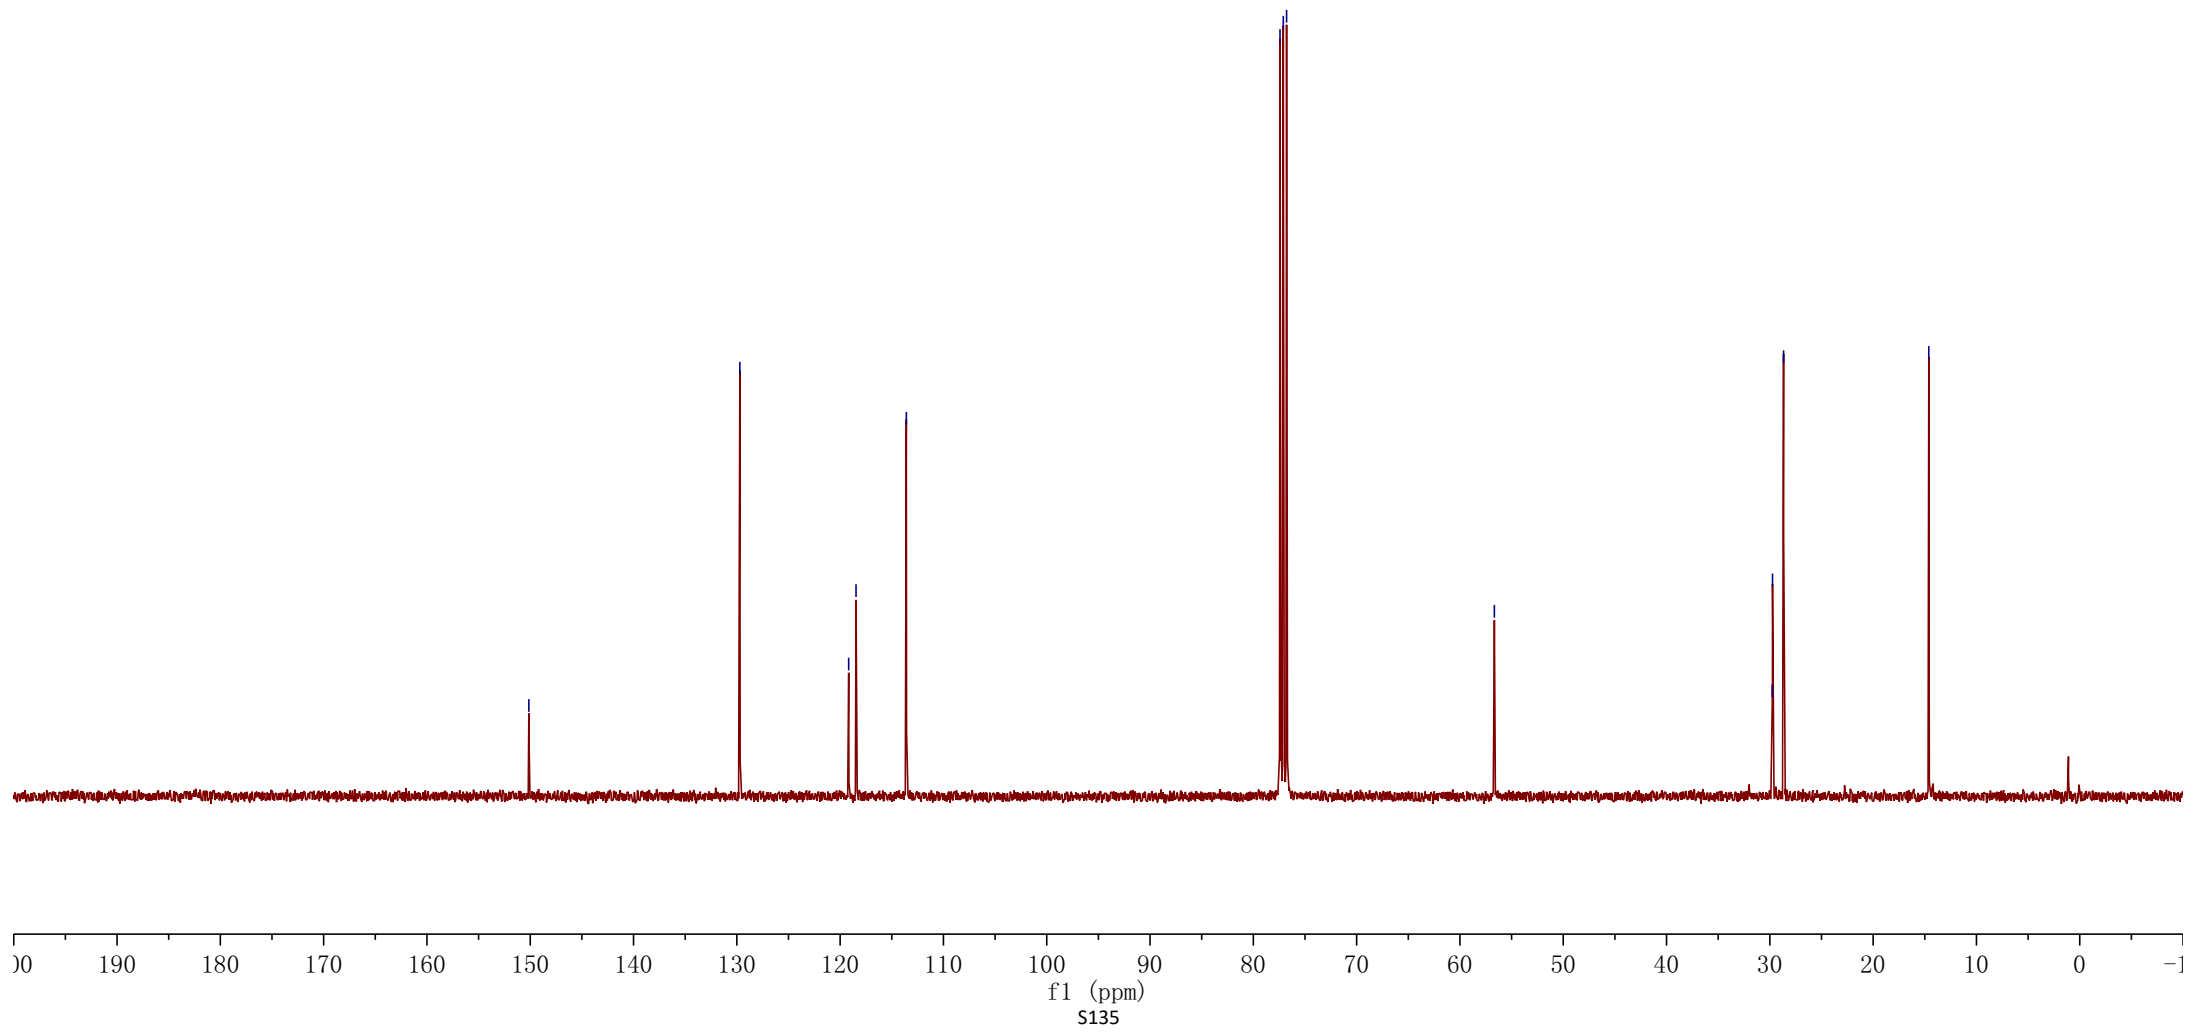

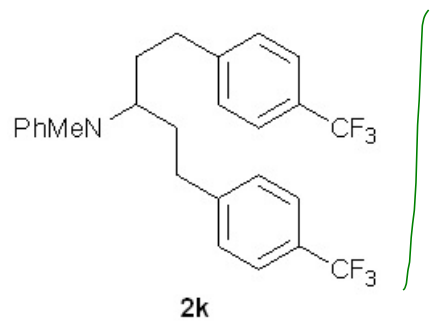

7.485  
7.465  
7.259  
7.210  
7.191  
7.169  
7.160  
7.140  
6.722  
6.704  
6.686  
6.642  
6.621

3.818  
3.805  
3.794  
3.782  
3.770  
3.759  
3.747

2.784  
2.669  
2.648  
2.626  
2.614  
2.596  
2.576  
2.561  
1.958  
1.945  
1.923  
1.908  
1.900  
1.885  
1.861  
1.843  
1.825  
1.800

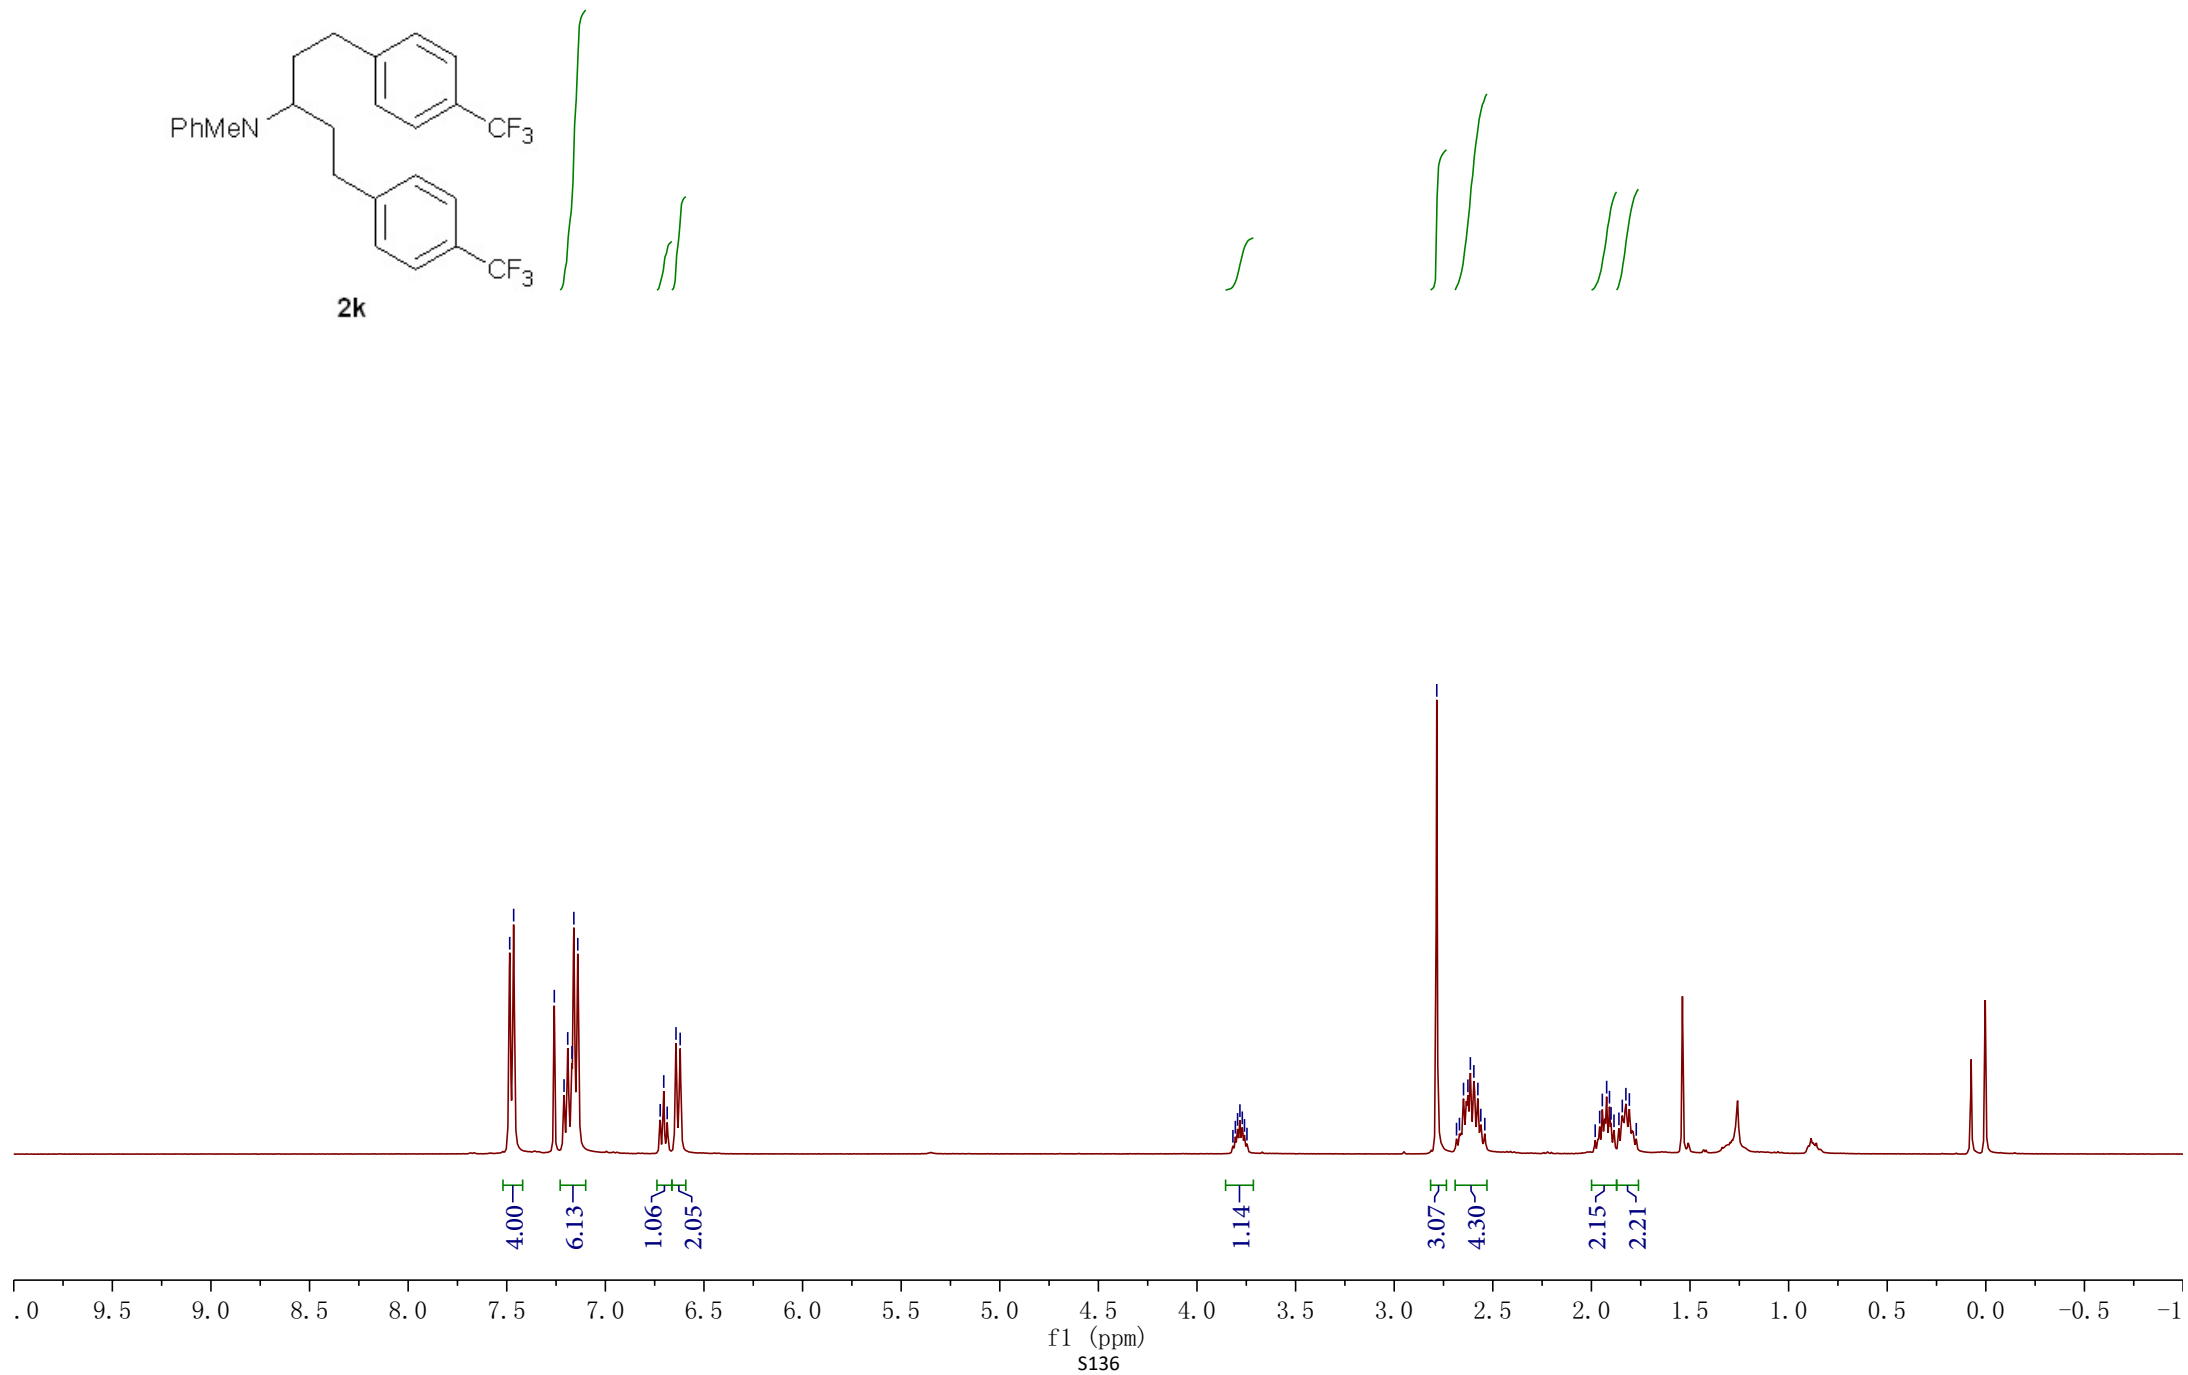



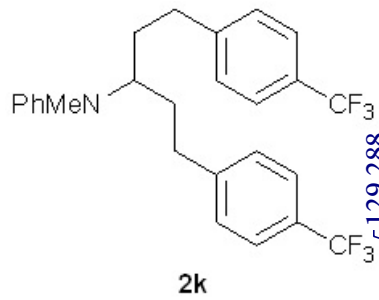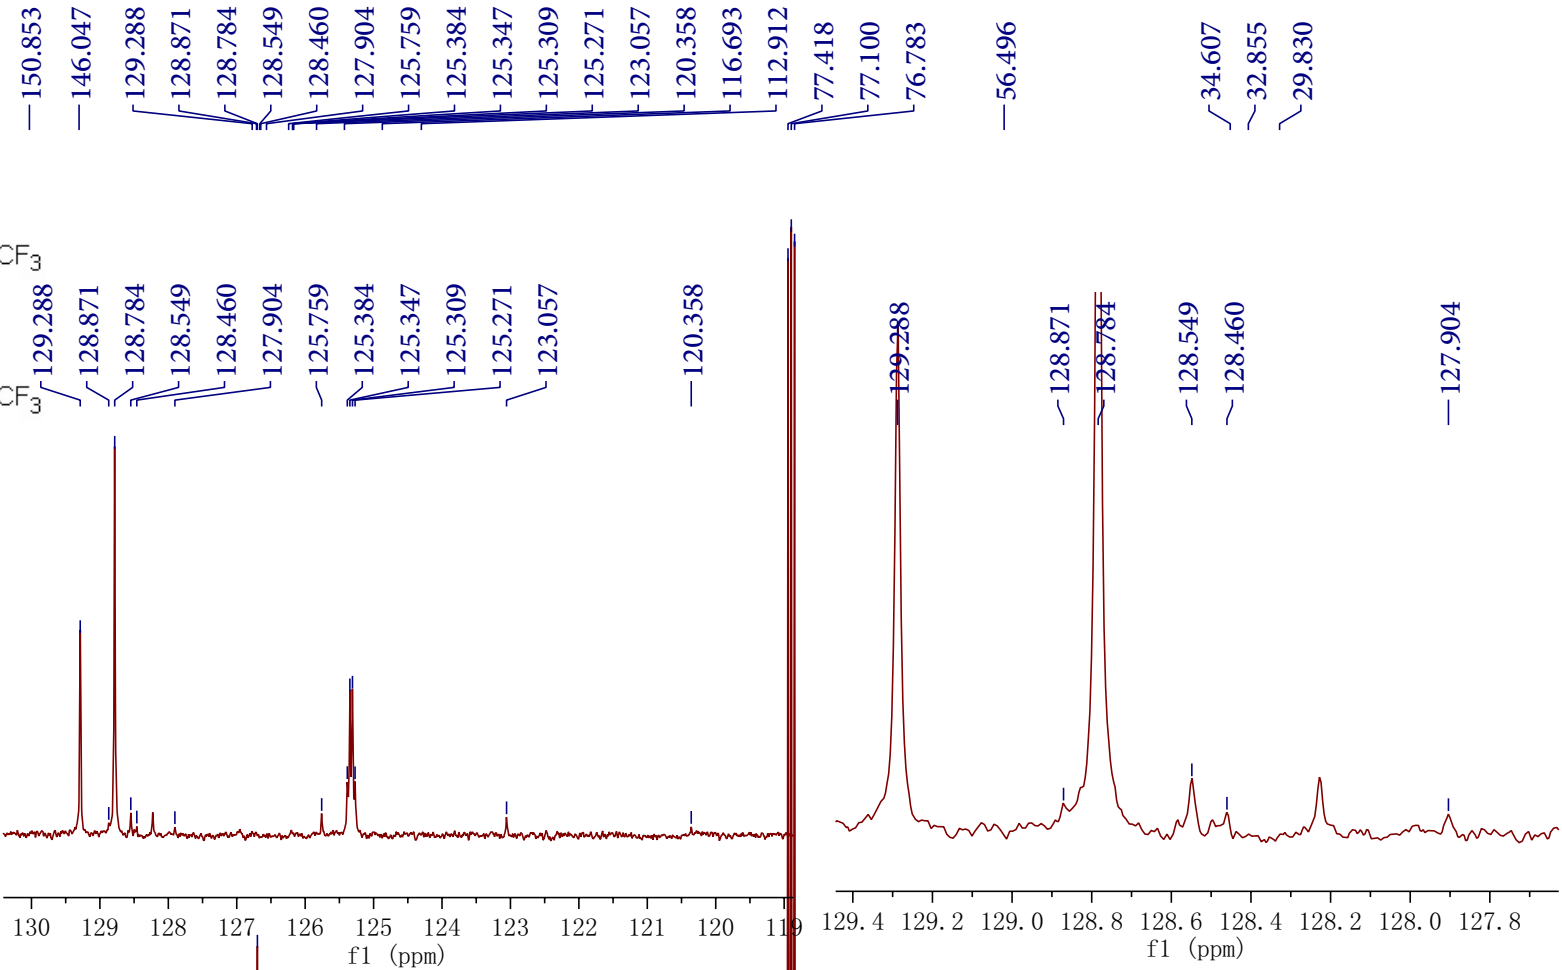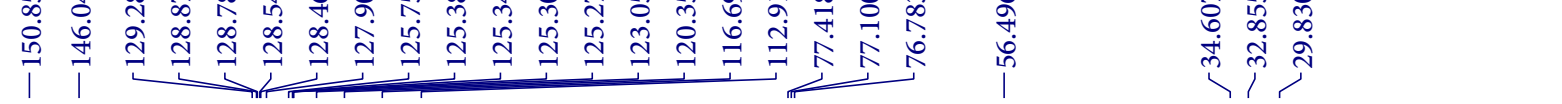

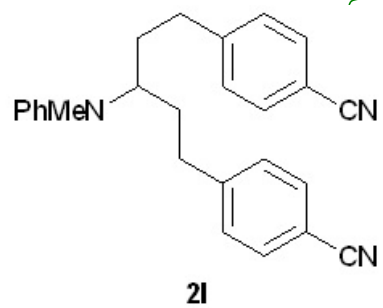

7.522  
7.501  
7.260  
7.224  
7.206  
7.202  
7.184  
7.152  
7.132  
6.738  
6.720  
6.702  
6.663  
6.642

3.830  
3.818  
3.806  
3.794  
3.782  
3.770  
3.758

2.755  
2.686  
2.672  
2.662  
2.650  
2.627  
2.612  
2.590  
2.567  
2.550  
2.532  
1.888  
1.843  
1.826  
1.814  
1.808  
1.790  
1.778

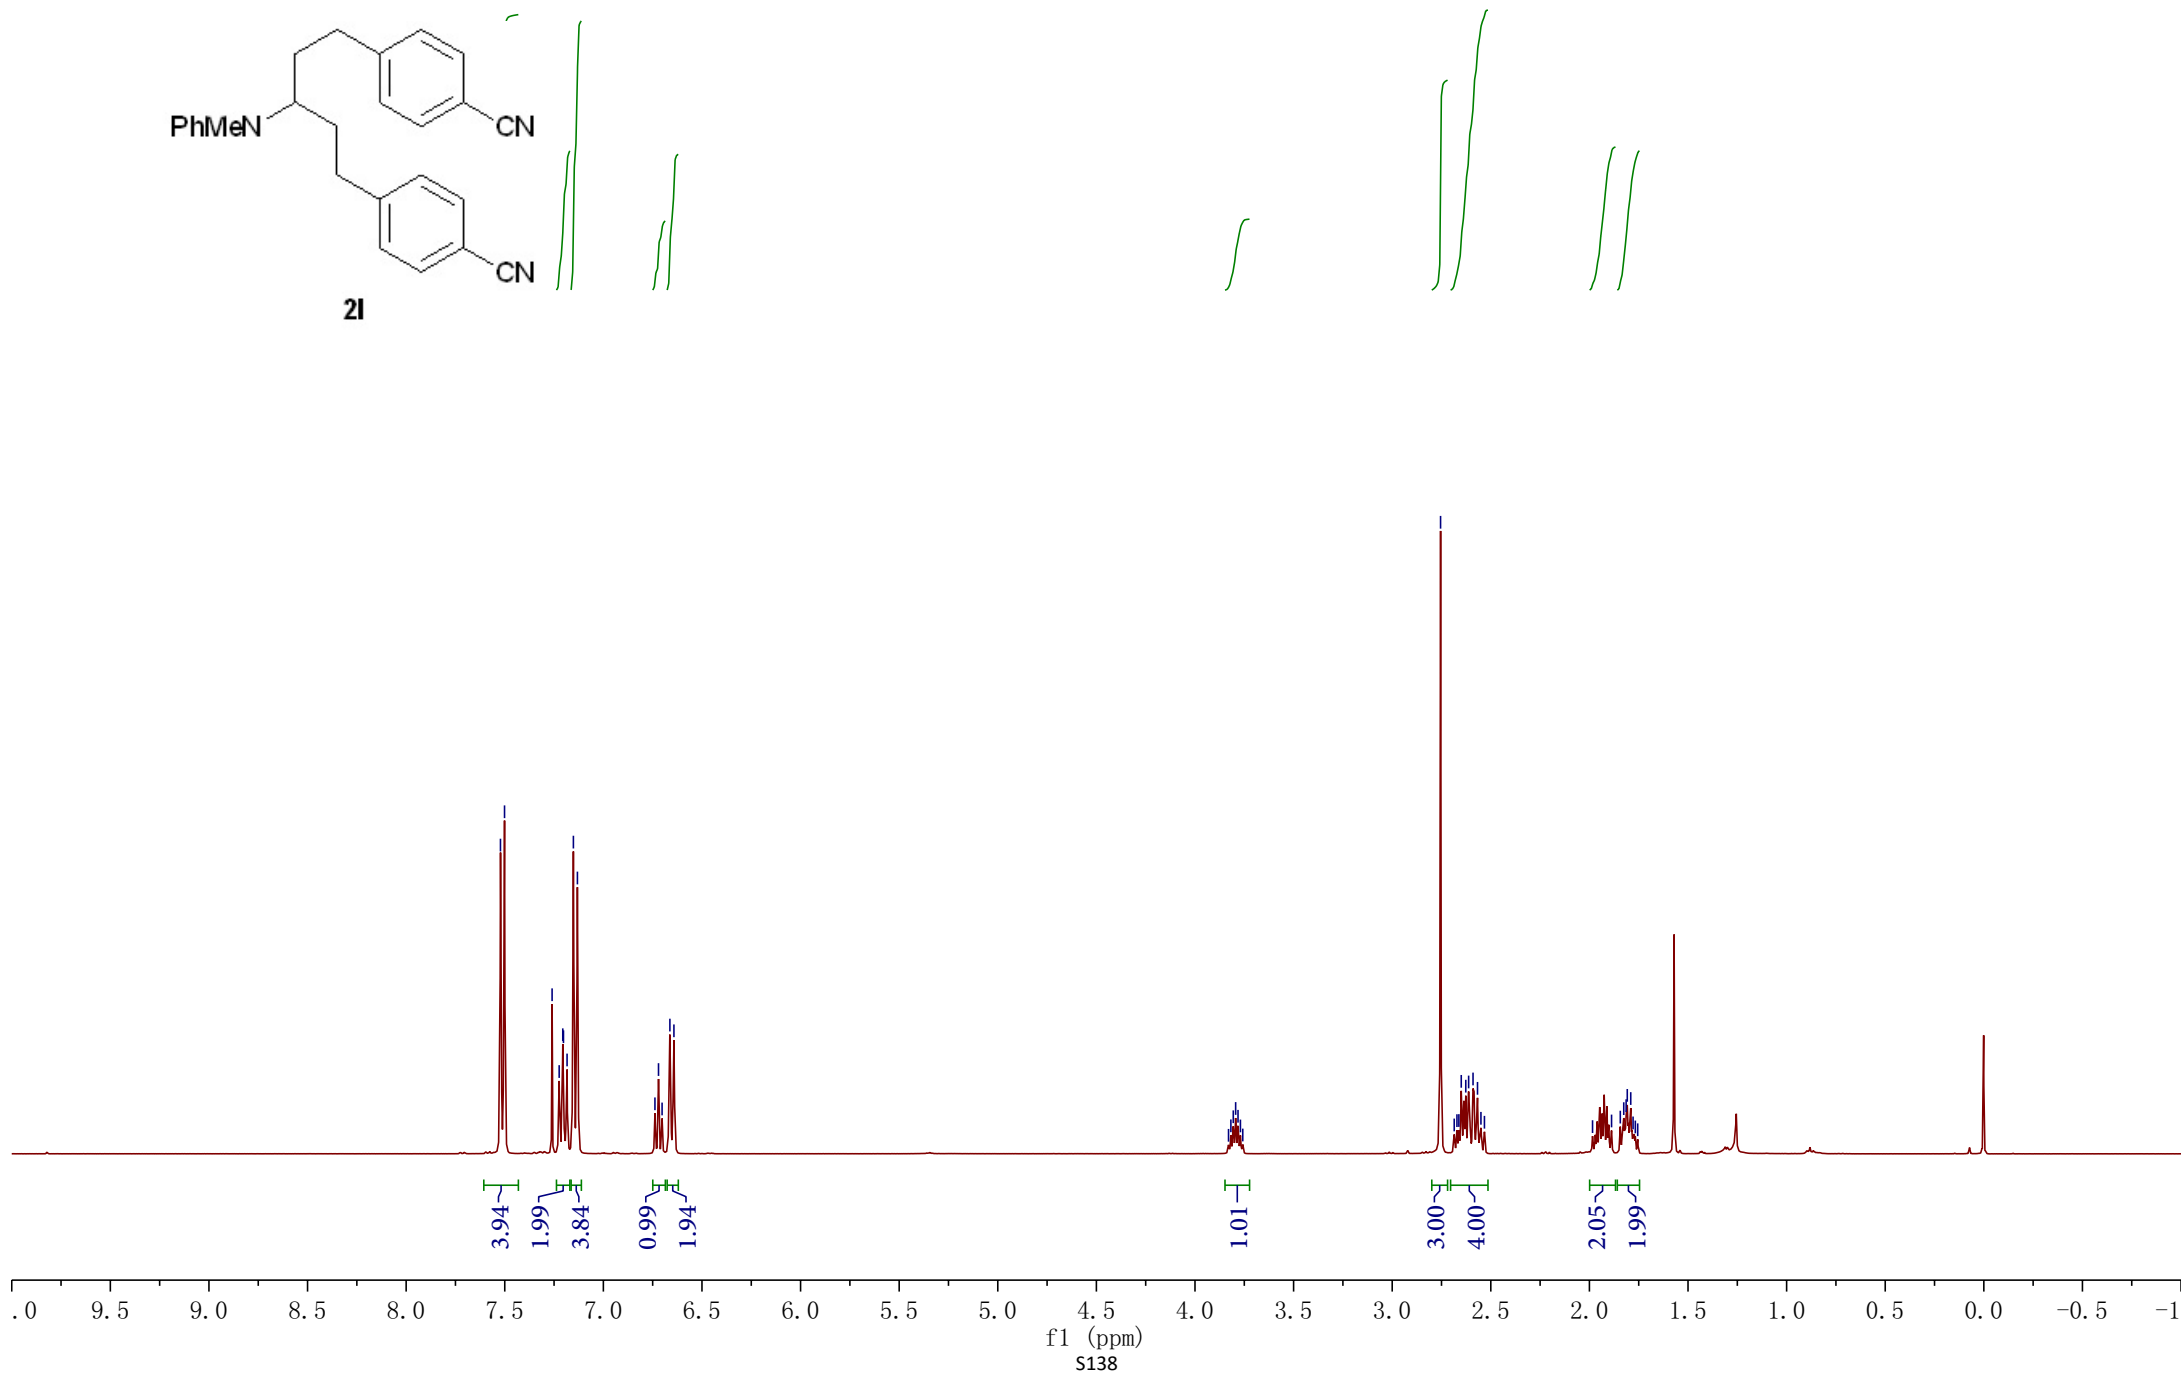

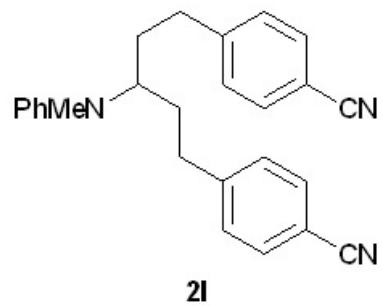

150.744  
147.506

132.232  
129.348  
129.224  
119.084  
116.869  
112.864  
109.855

77.412  
77.095  
76.778

56.683

34.497  
33.173  
29.688

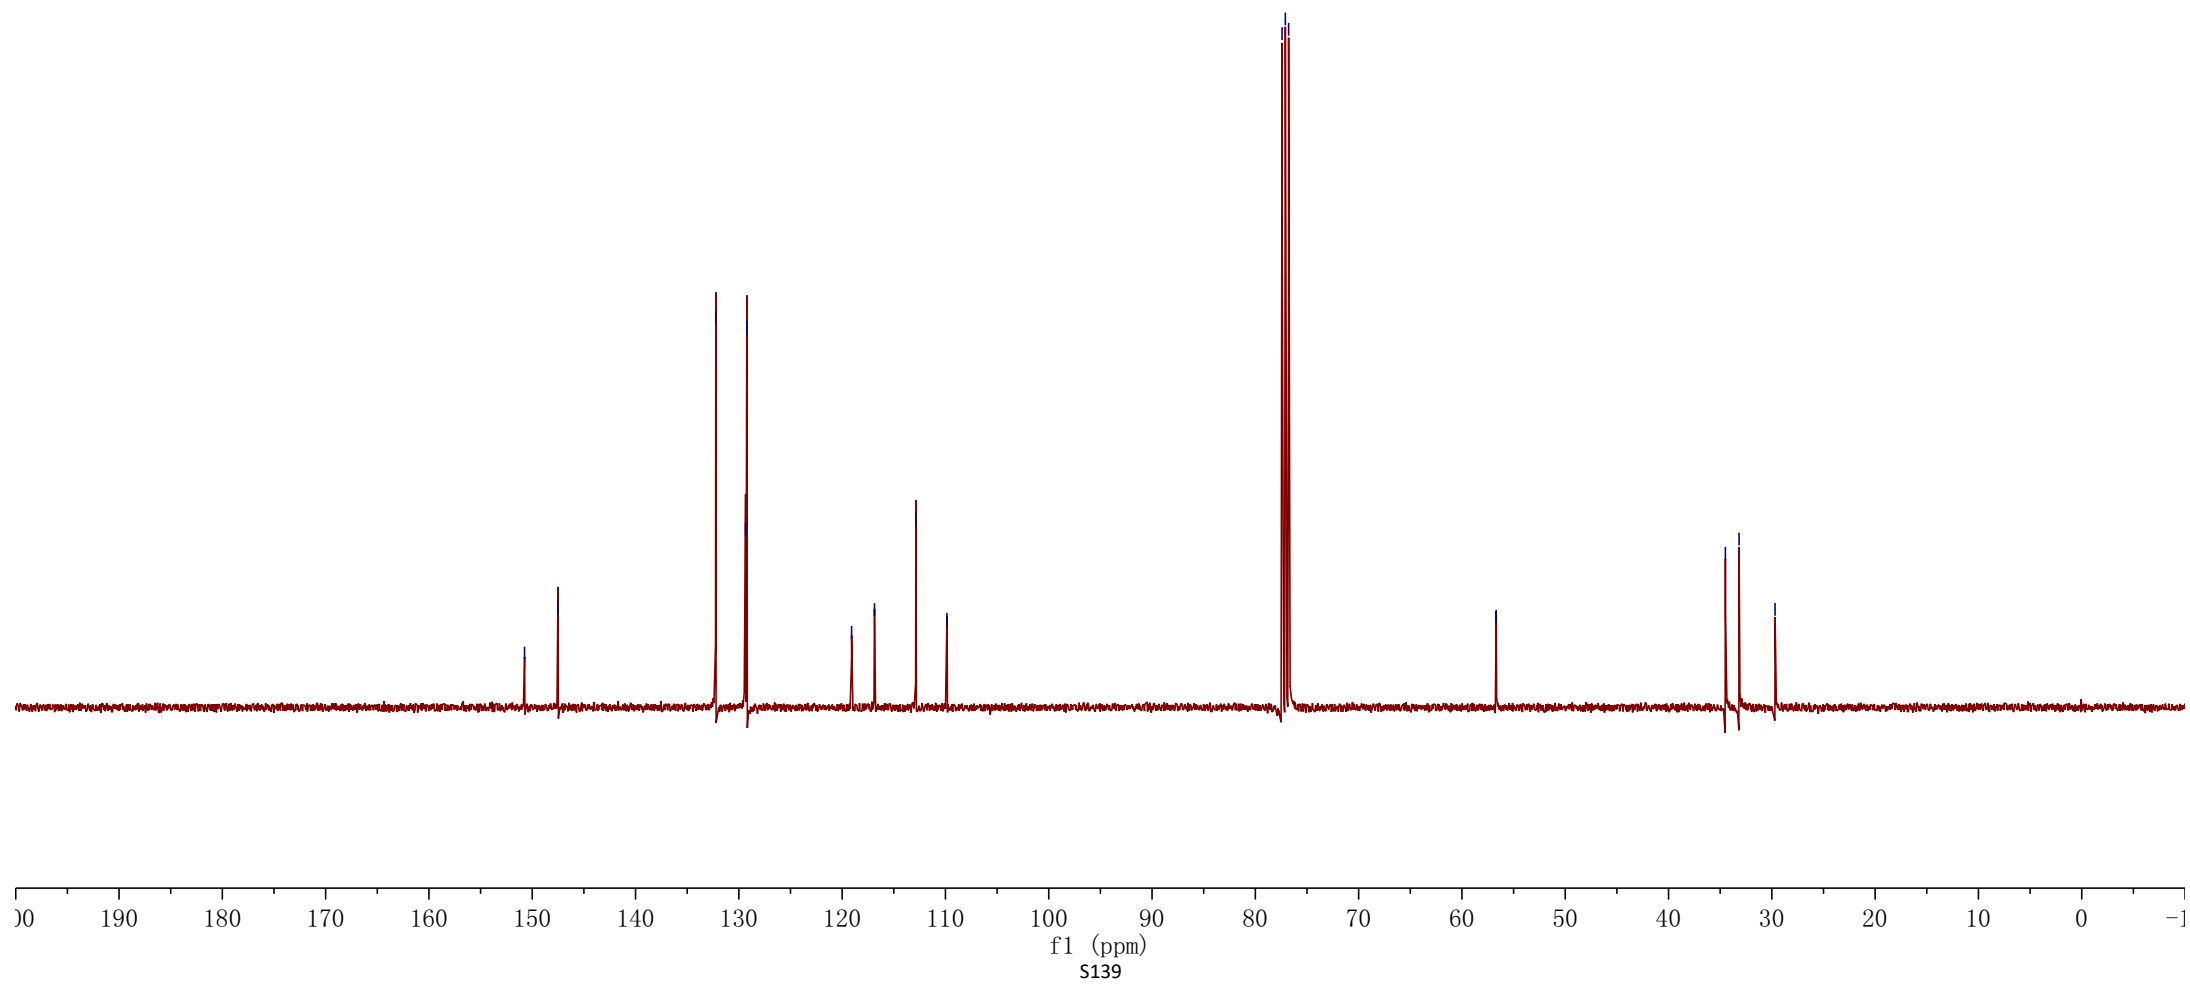

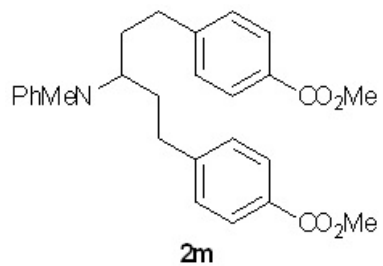

7.913 7.892 7.260 7.220 7.201 7.198 7.180 7.135 7.115 6.719 6.701 6.684 6.664 3.903 3.824 3.812 3.800 2.783 2.663 2.642 2.619 2.605 2.583 2.566 2.549 2.531 1.961 1.948 1.935 1.926 1.911 1.903 1.888 1.863 1.846 1.833 1.827 1.810 1.798

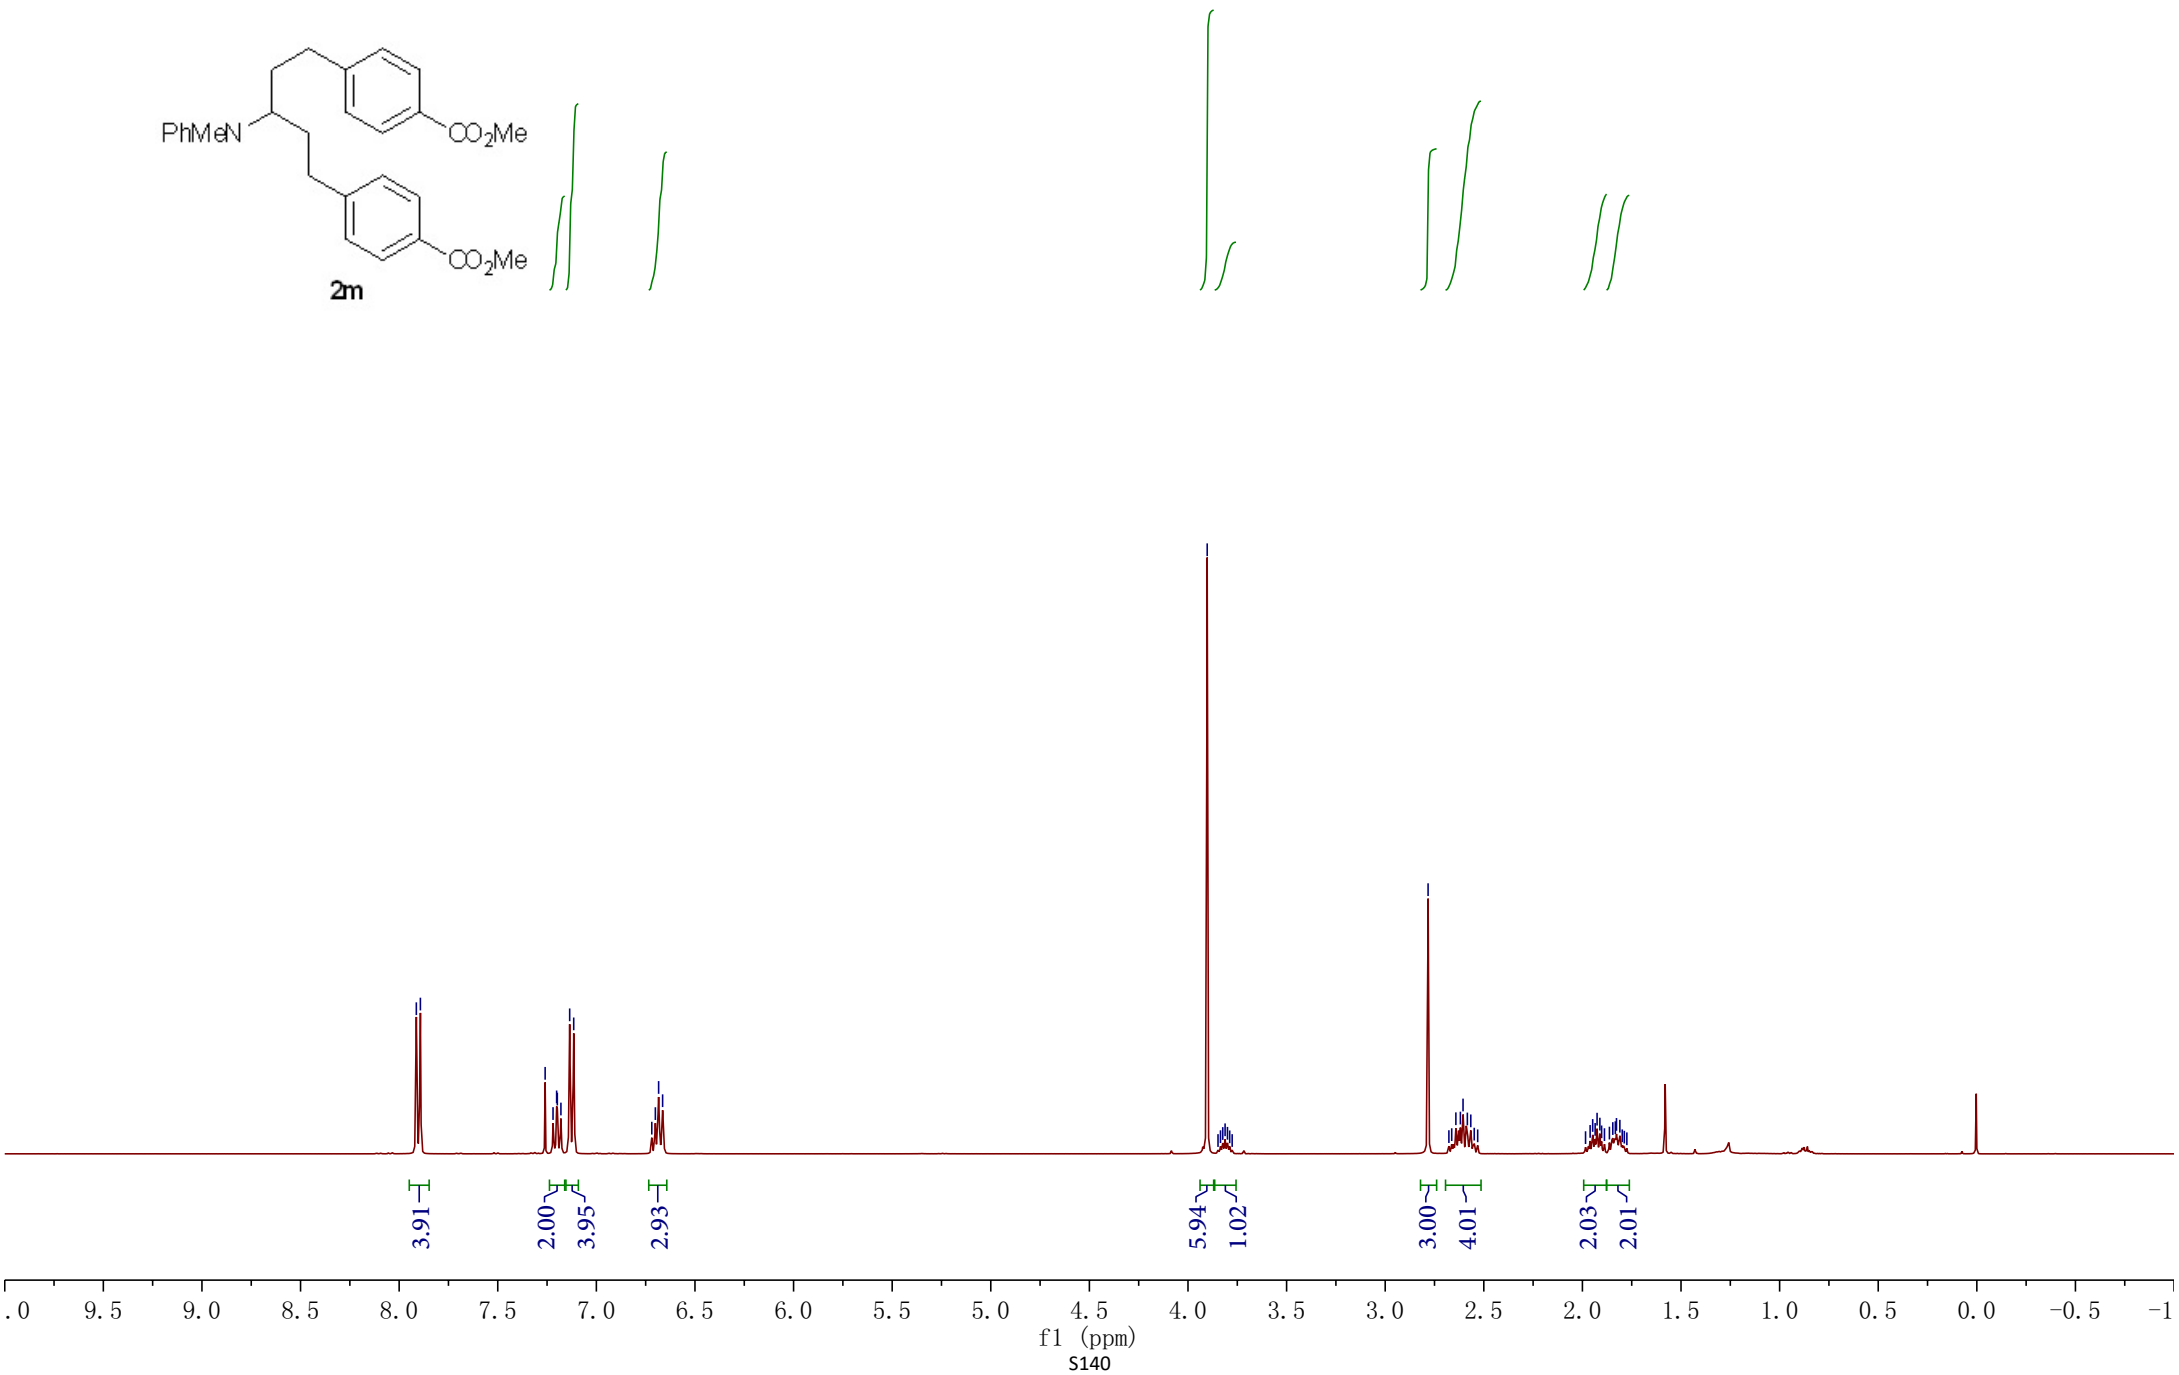

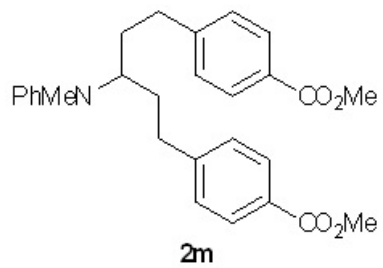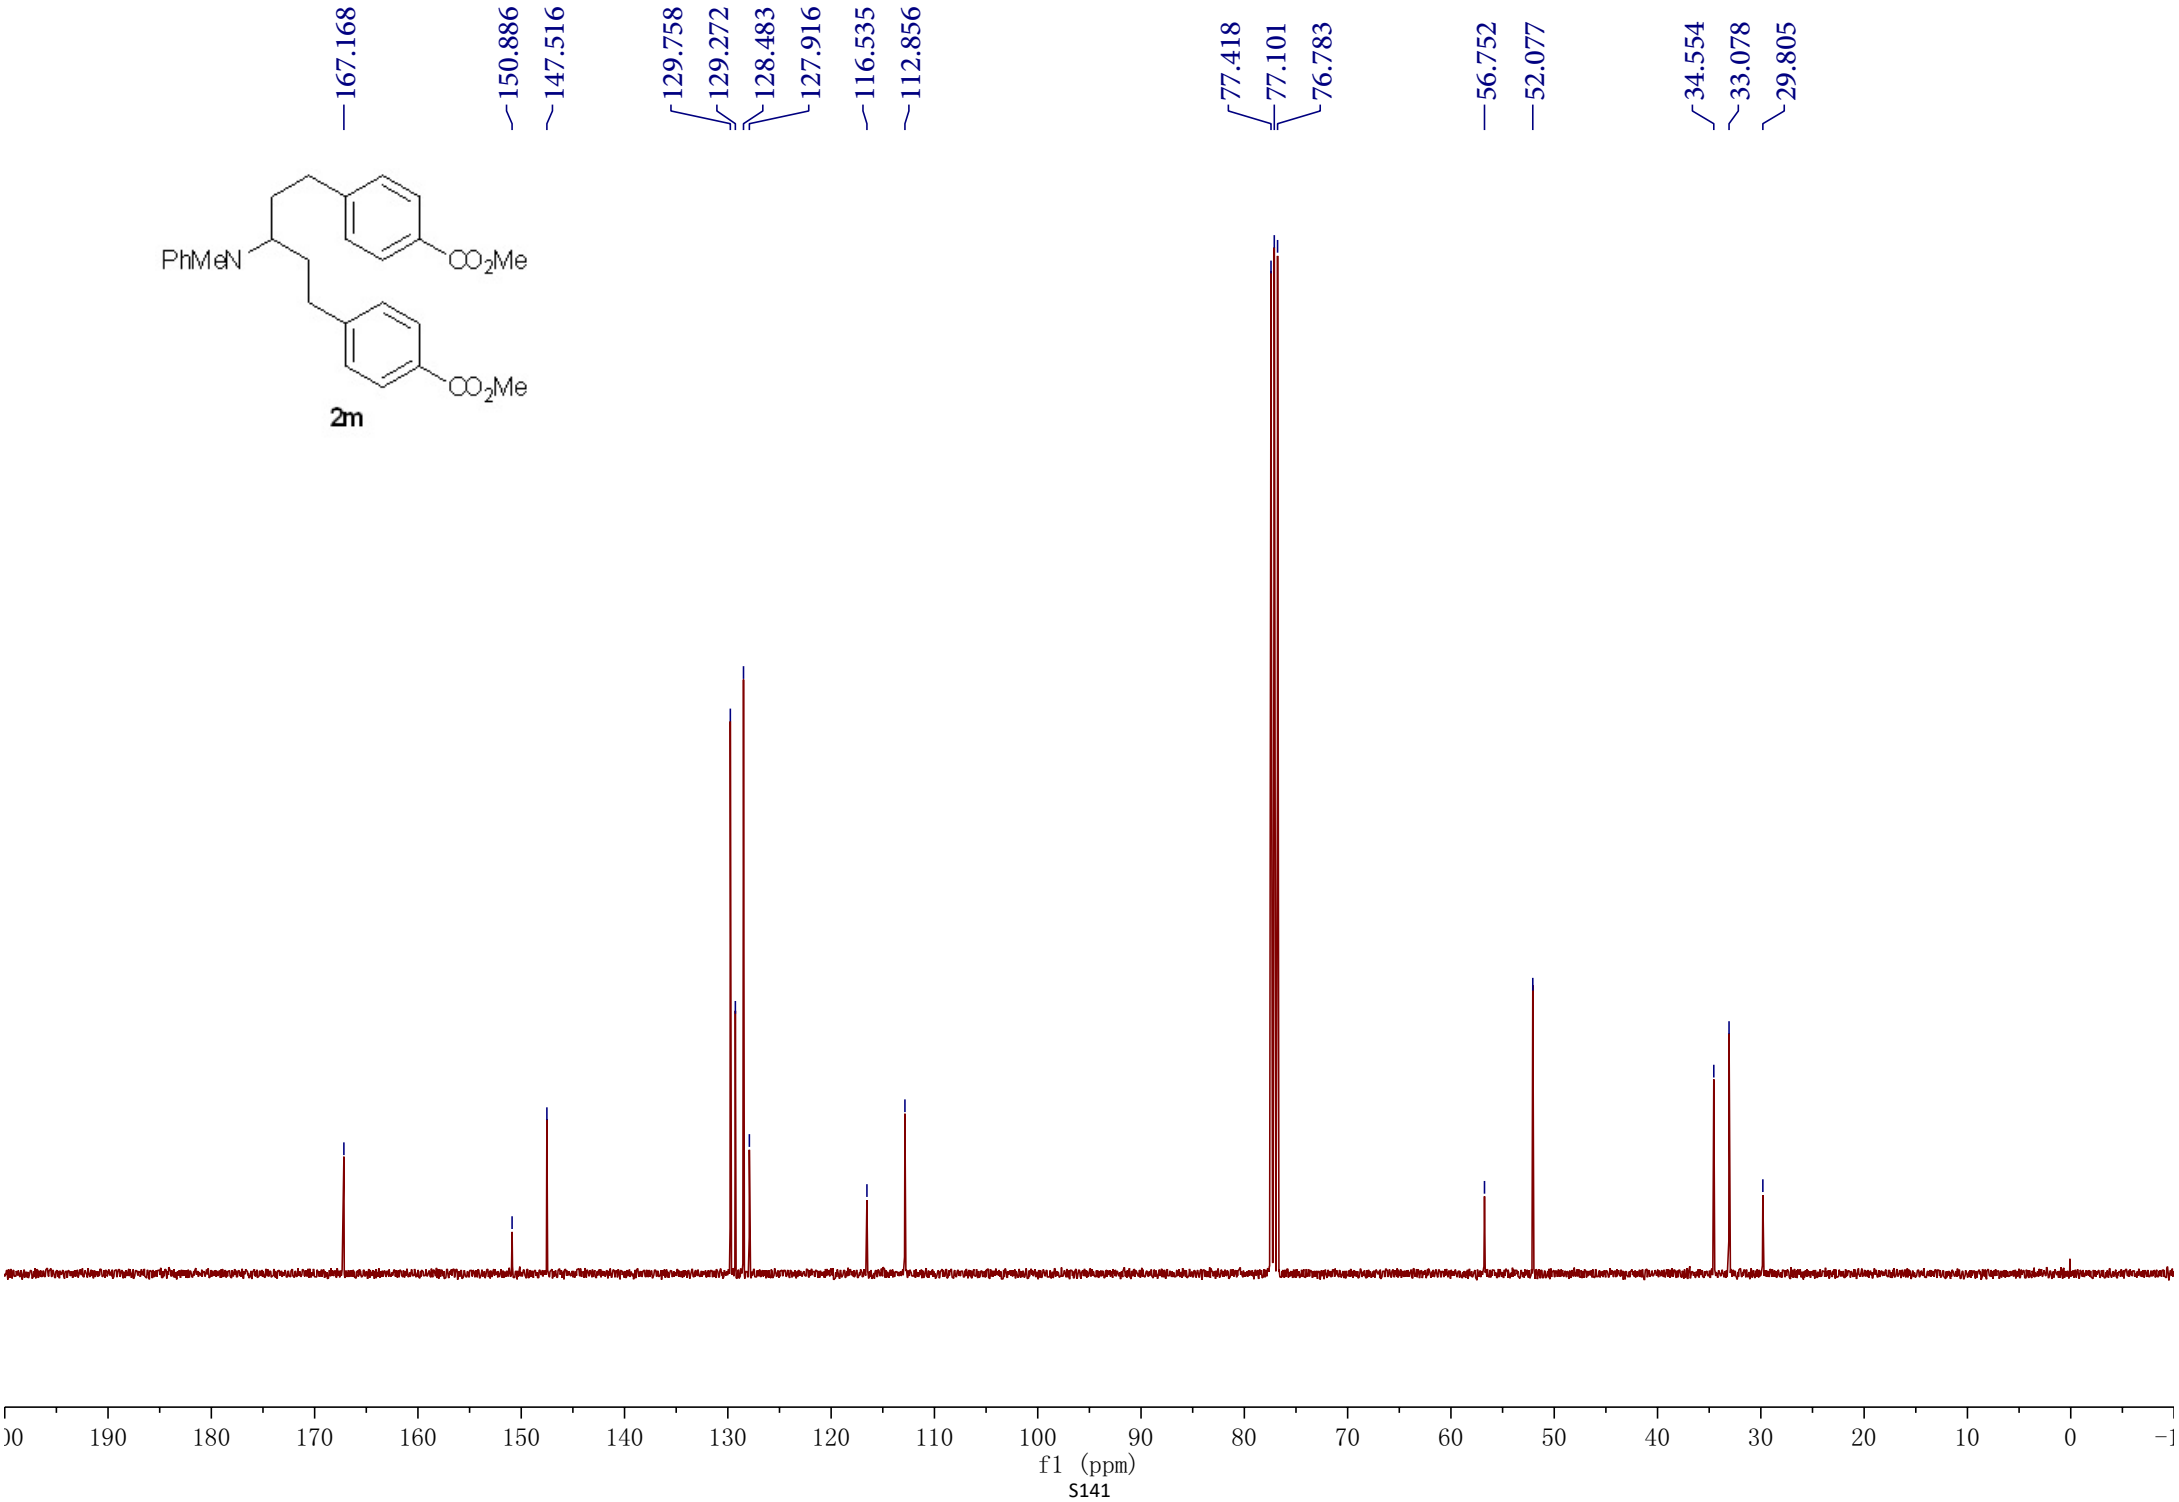

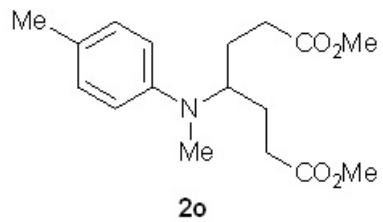

7.260  
7.014  
6.993  
6.663  
6.641

3.930  
3.918  
3.906  
3.893  
3.881  
3.869  
3.856  
3.589

2.647  
2.281  
2.277  
2.264  
2.258  
2.243  
2.238  
2.233  
2.212  
1.913  
1.895  
1.871  
1.853  
1.835  
1.822  
1.801

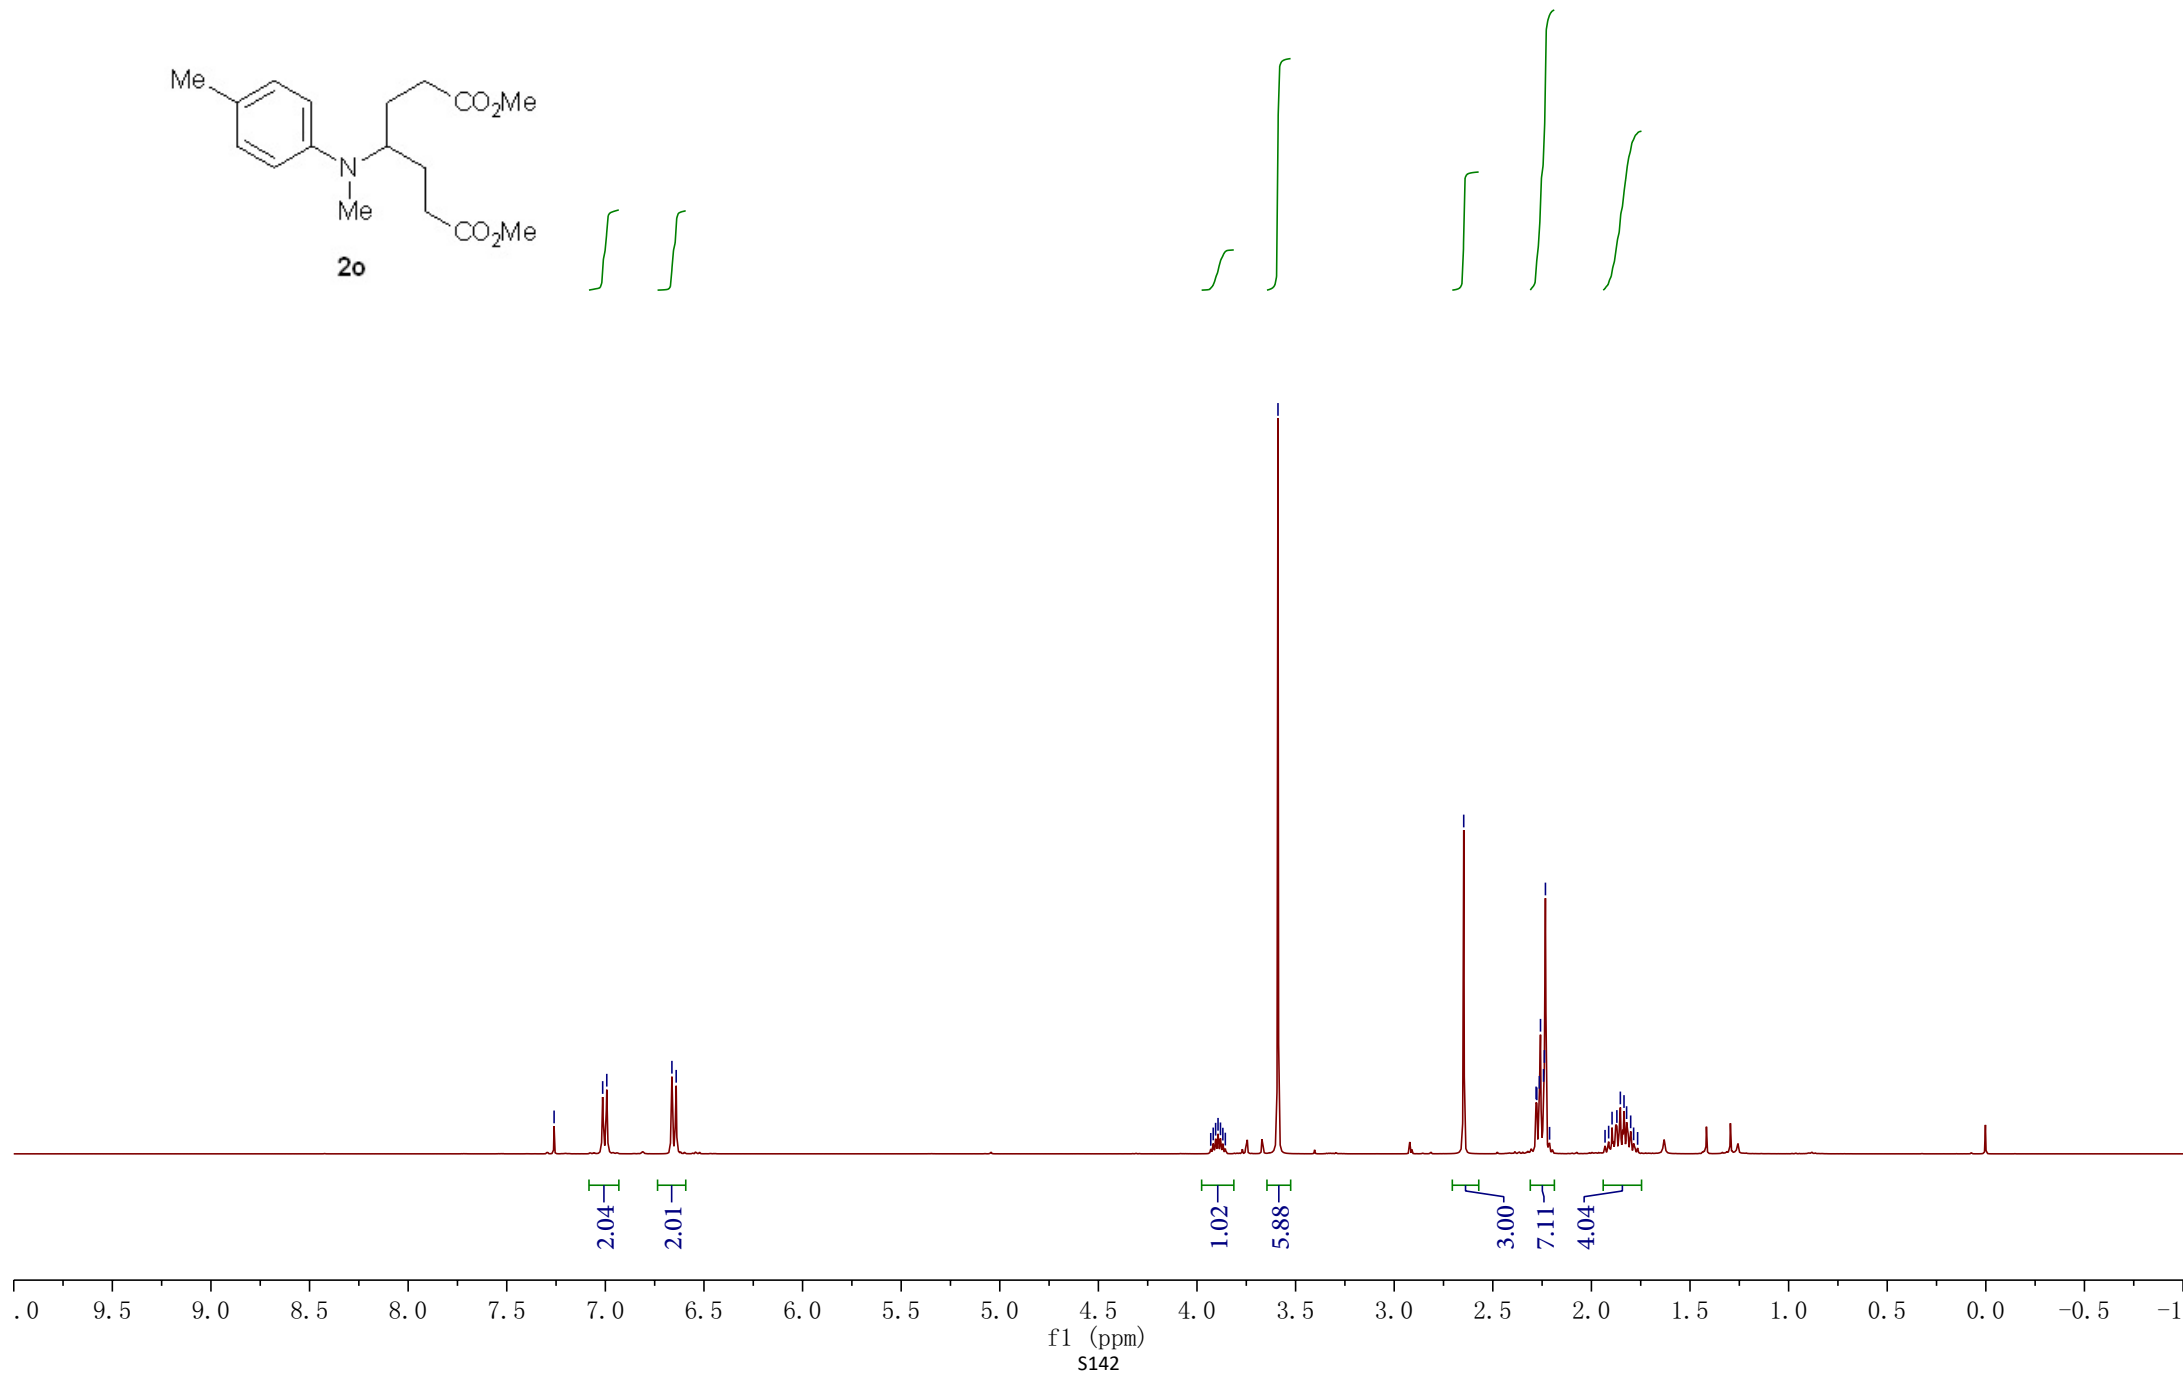

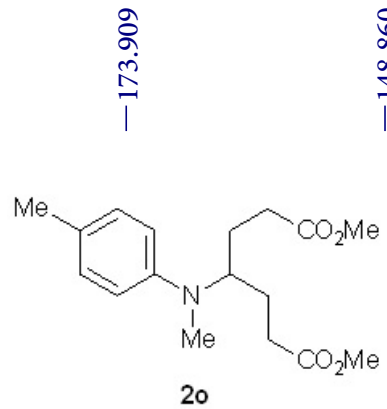

— 173.909

— 148.860

— 129.736

— 125.838

— 113.023

77.418

77.100

76.782

— 56.979

— 51.576

31.127

29.564

27.991

20.233

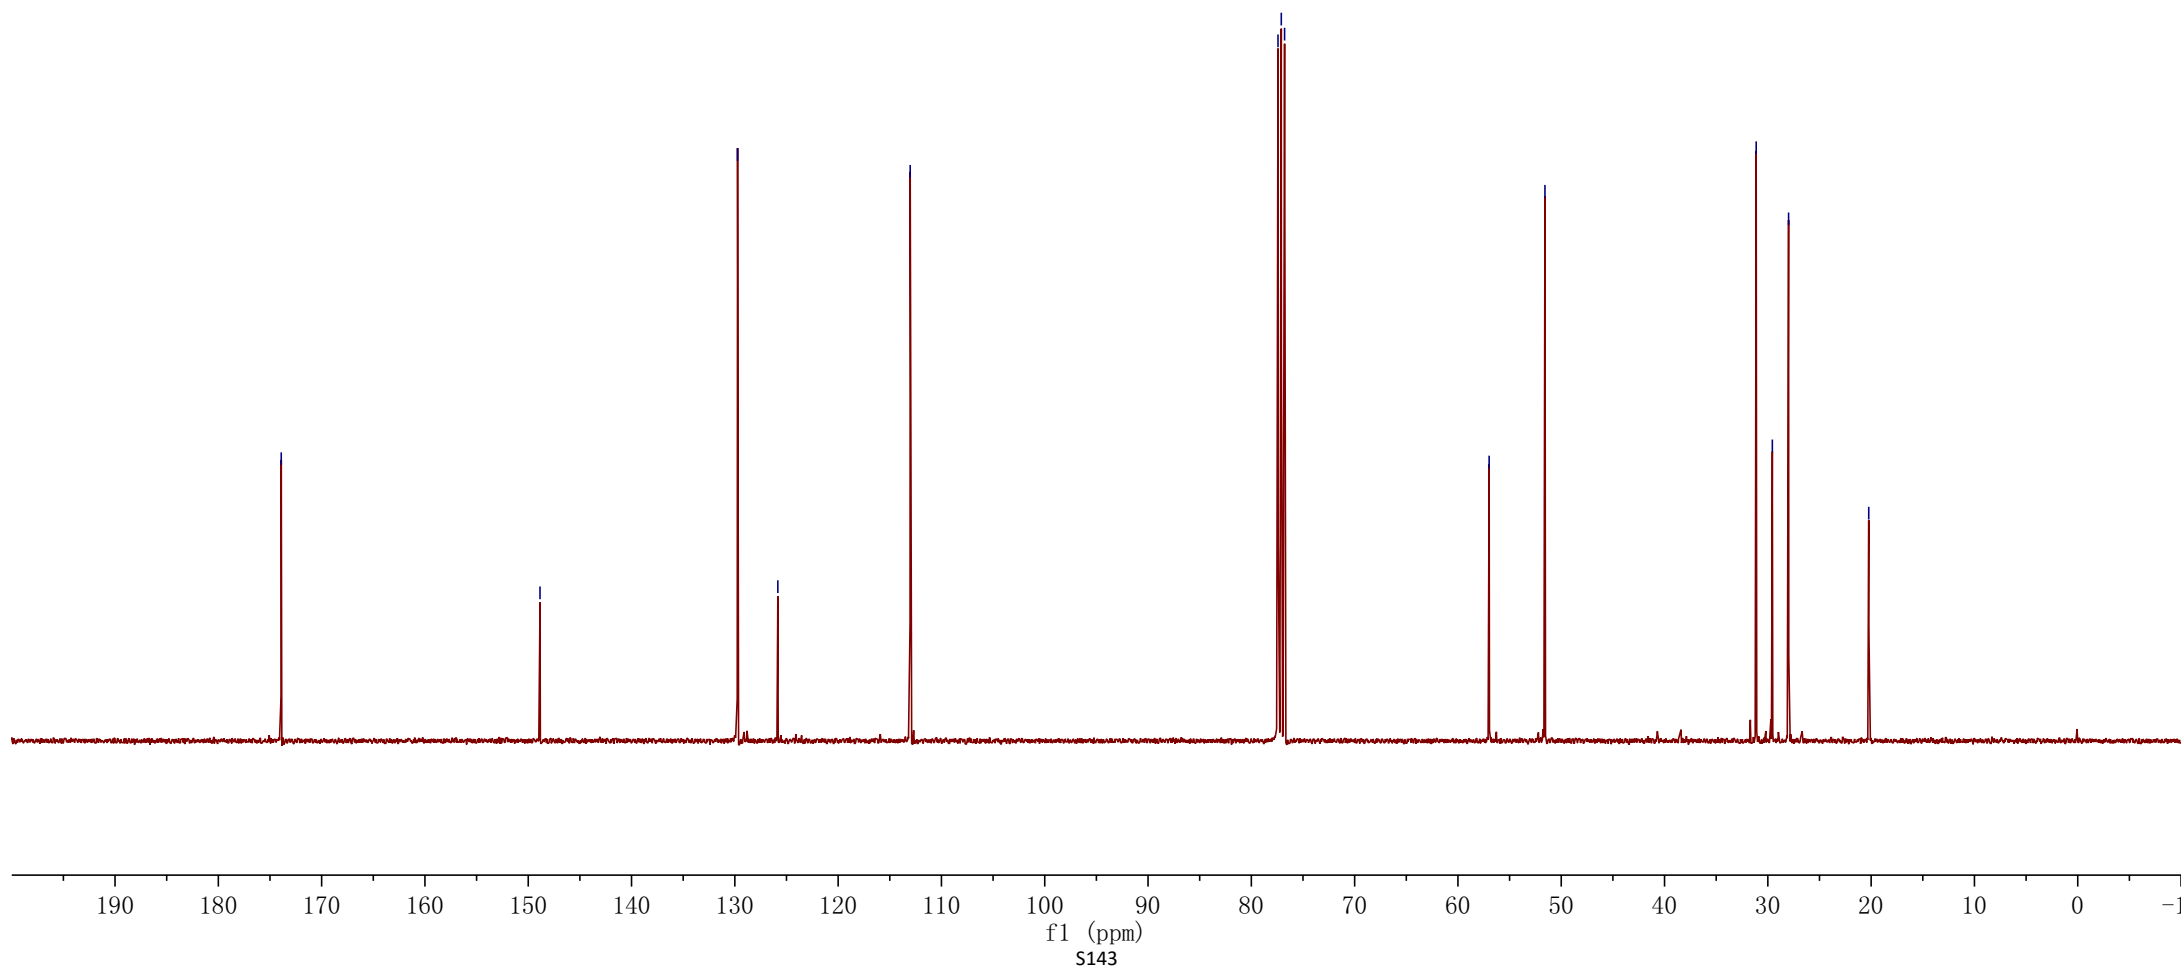

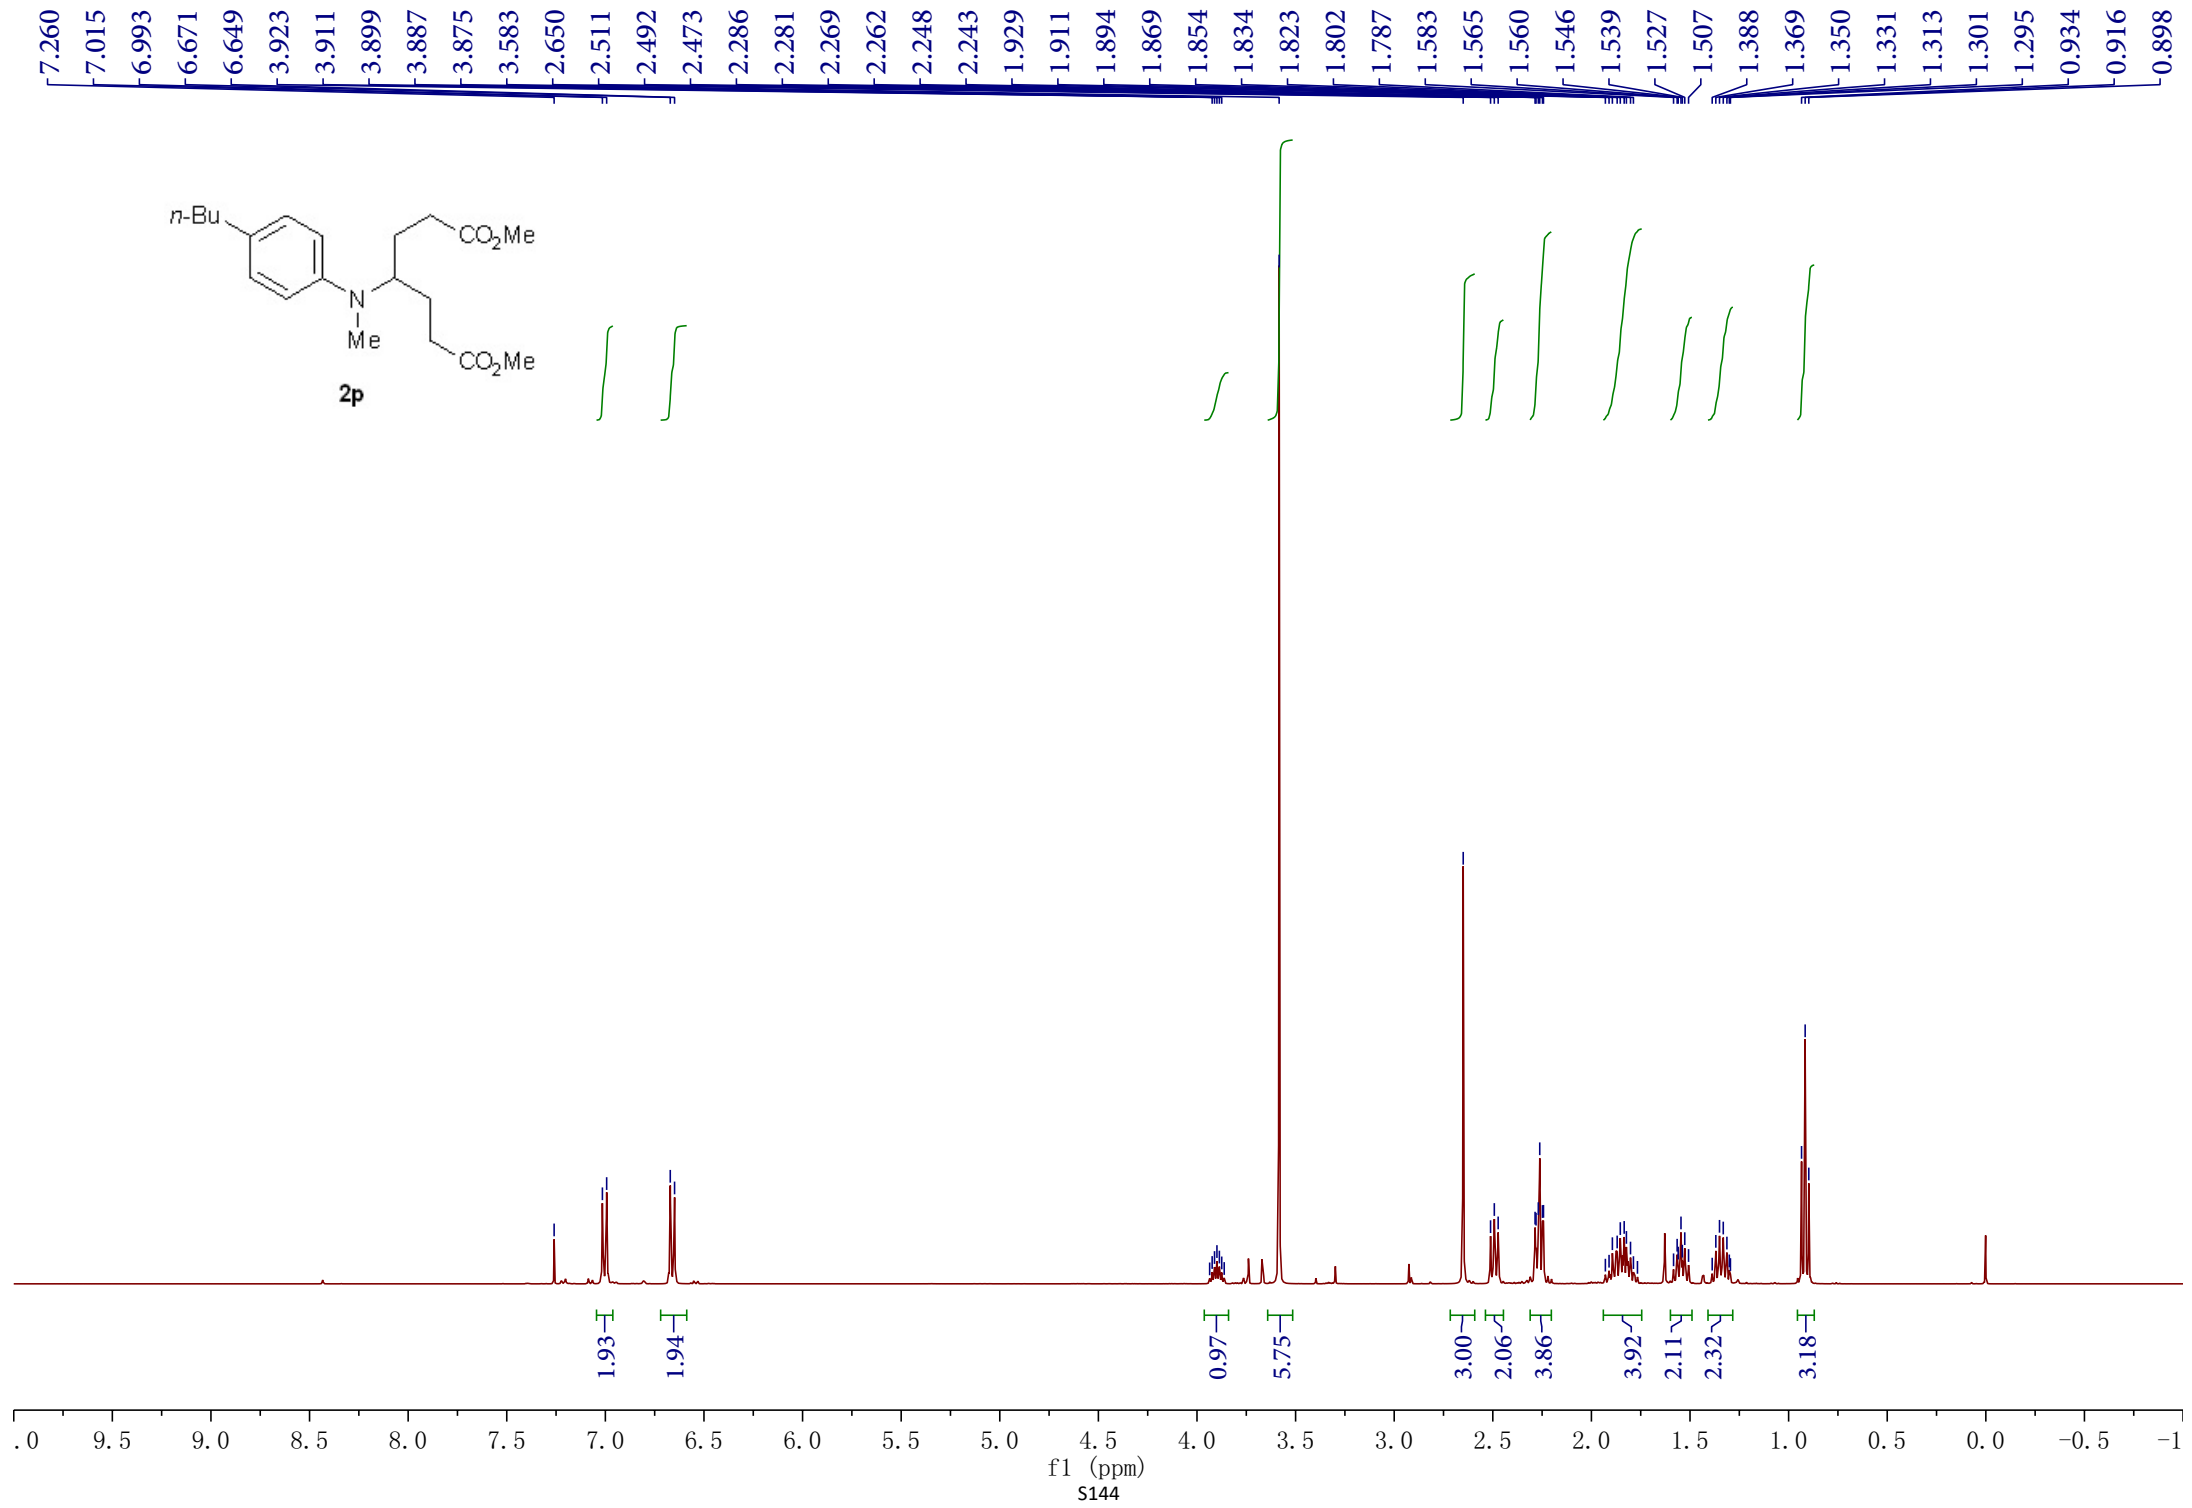



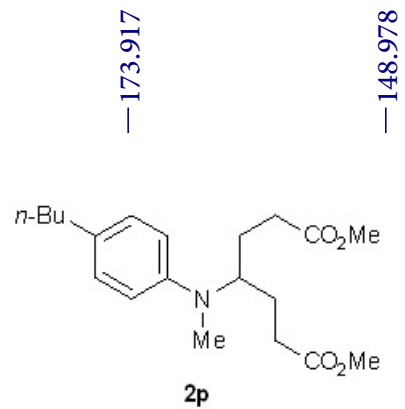

173.917

148.978

131.084

129.064

112.938

77.418

77.101

76.783

56.912

51.569

34.578

34.008

31.129

29.557

27.984

22.450

14.072

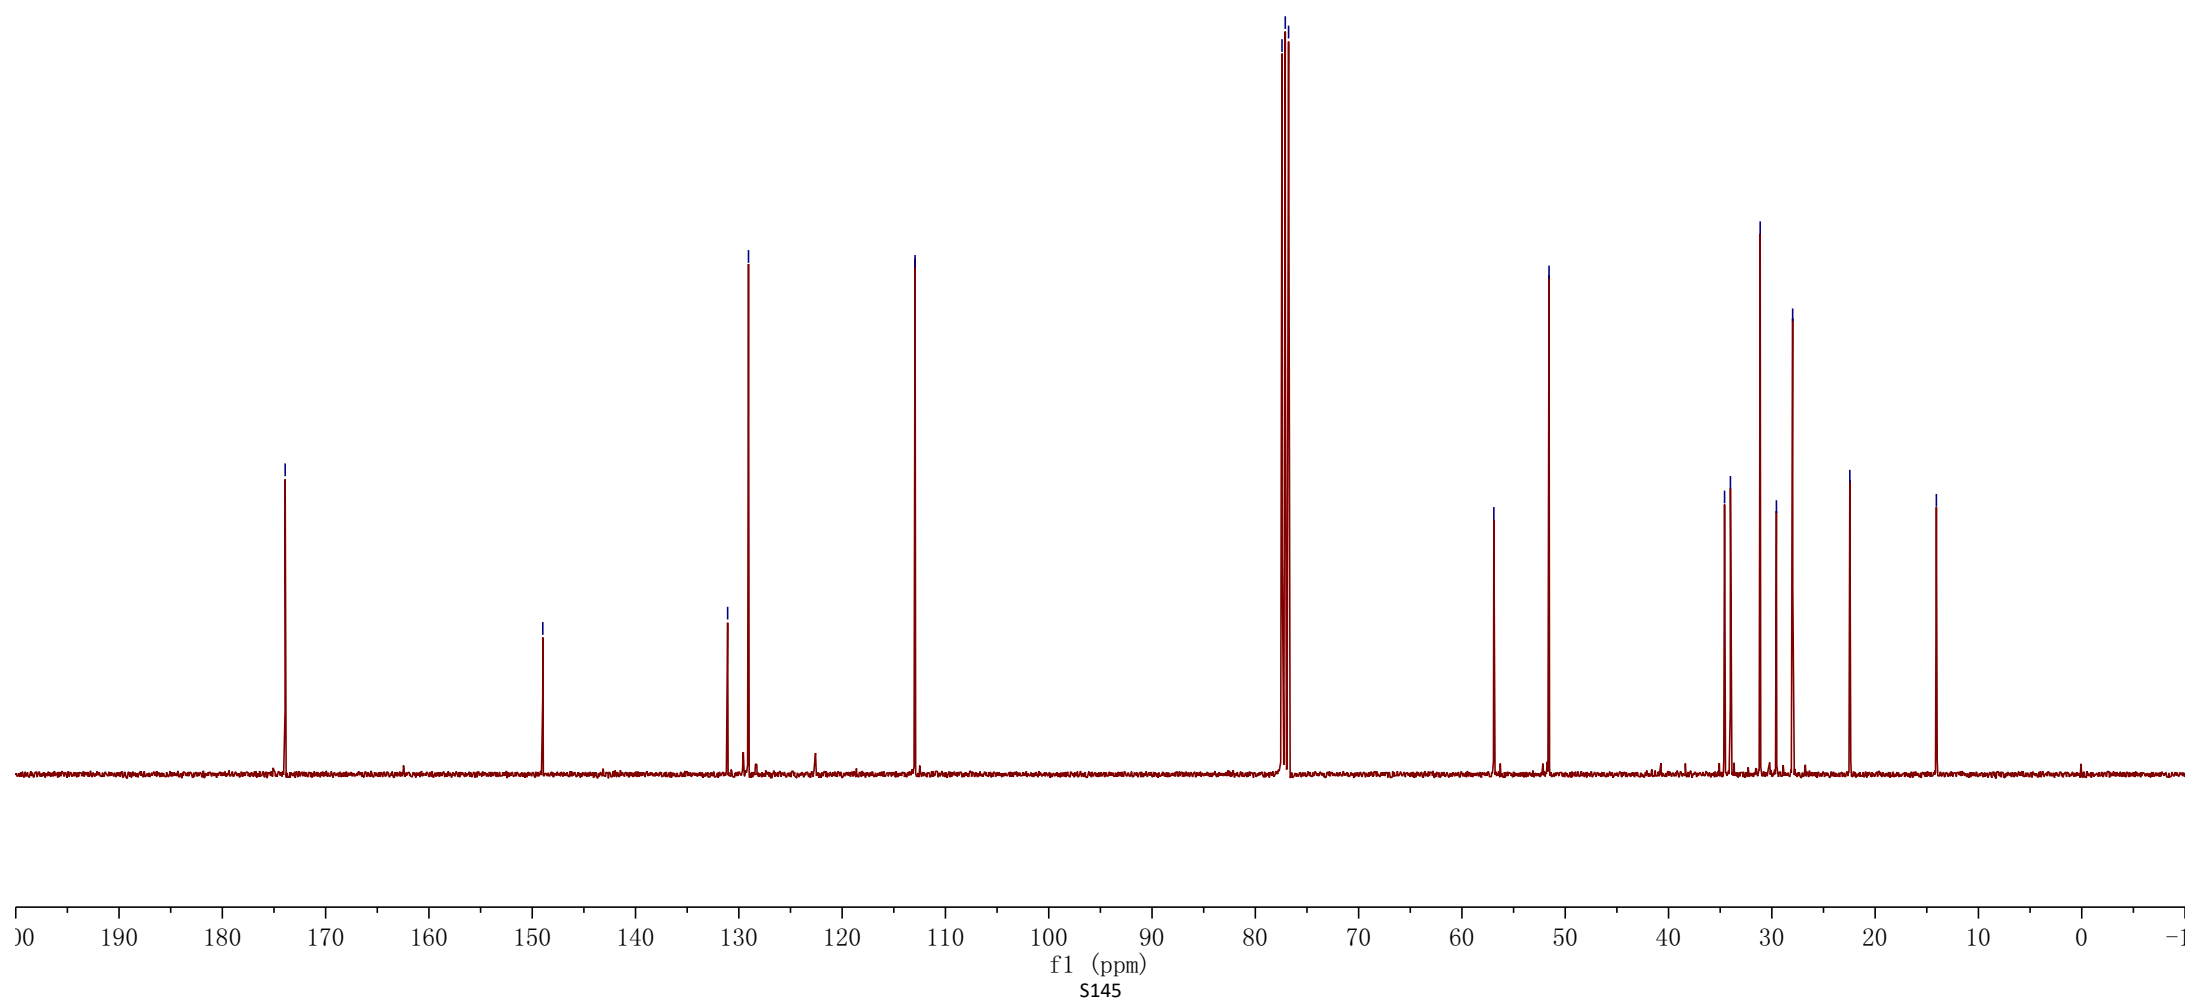

7.260 7.046 7.024 6.682 6.660 3.939 3.926 3.914 3.902 3.890 3.878 3.865 3.582 2.654 2.411 2.391 2.383 2.364 2.355 2.289 2.284 2.266 2.252 2.247 1.927 1.908 1.891 1.872 1.849 1.832 1.803 1.740 1.709 1.388 1.365 1.337 1.271 1.261 1.239 1.232 1.216 1.200 1.178

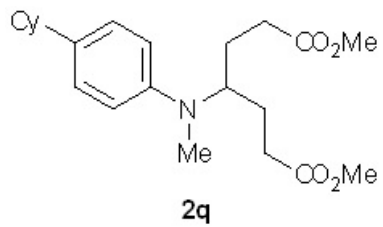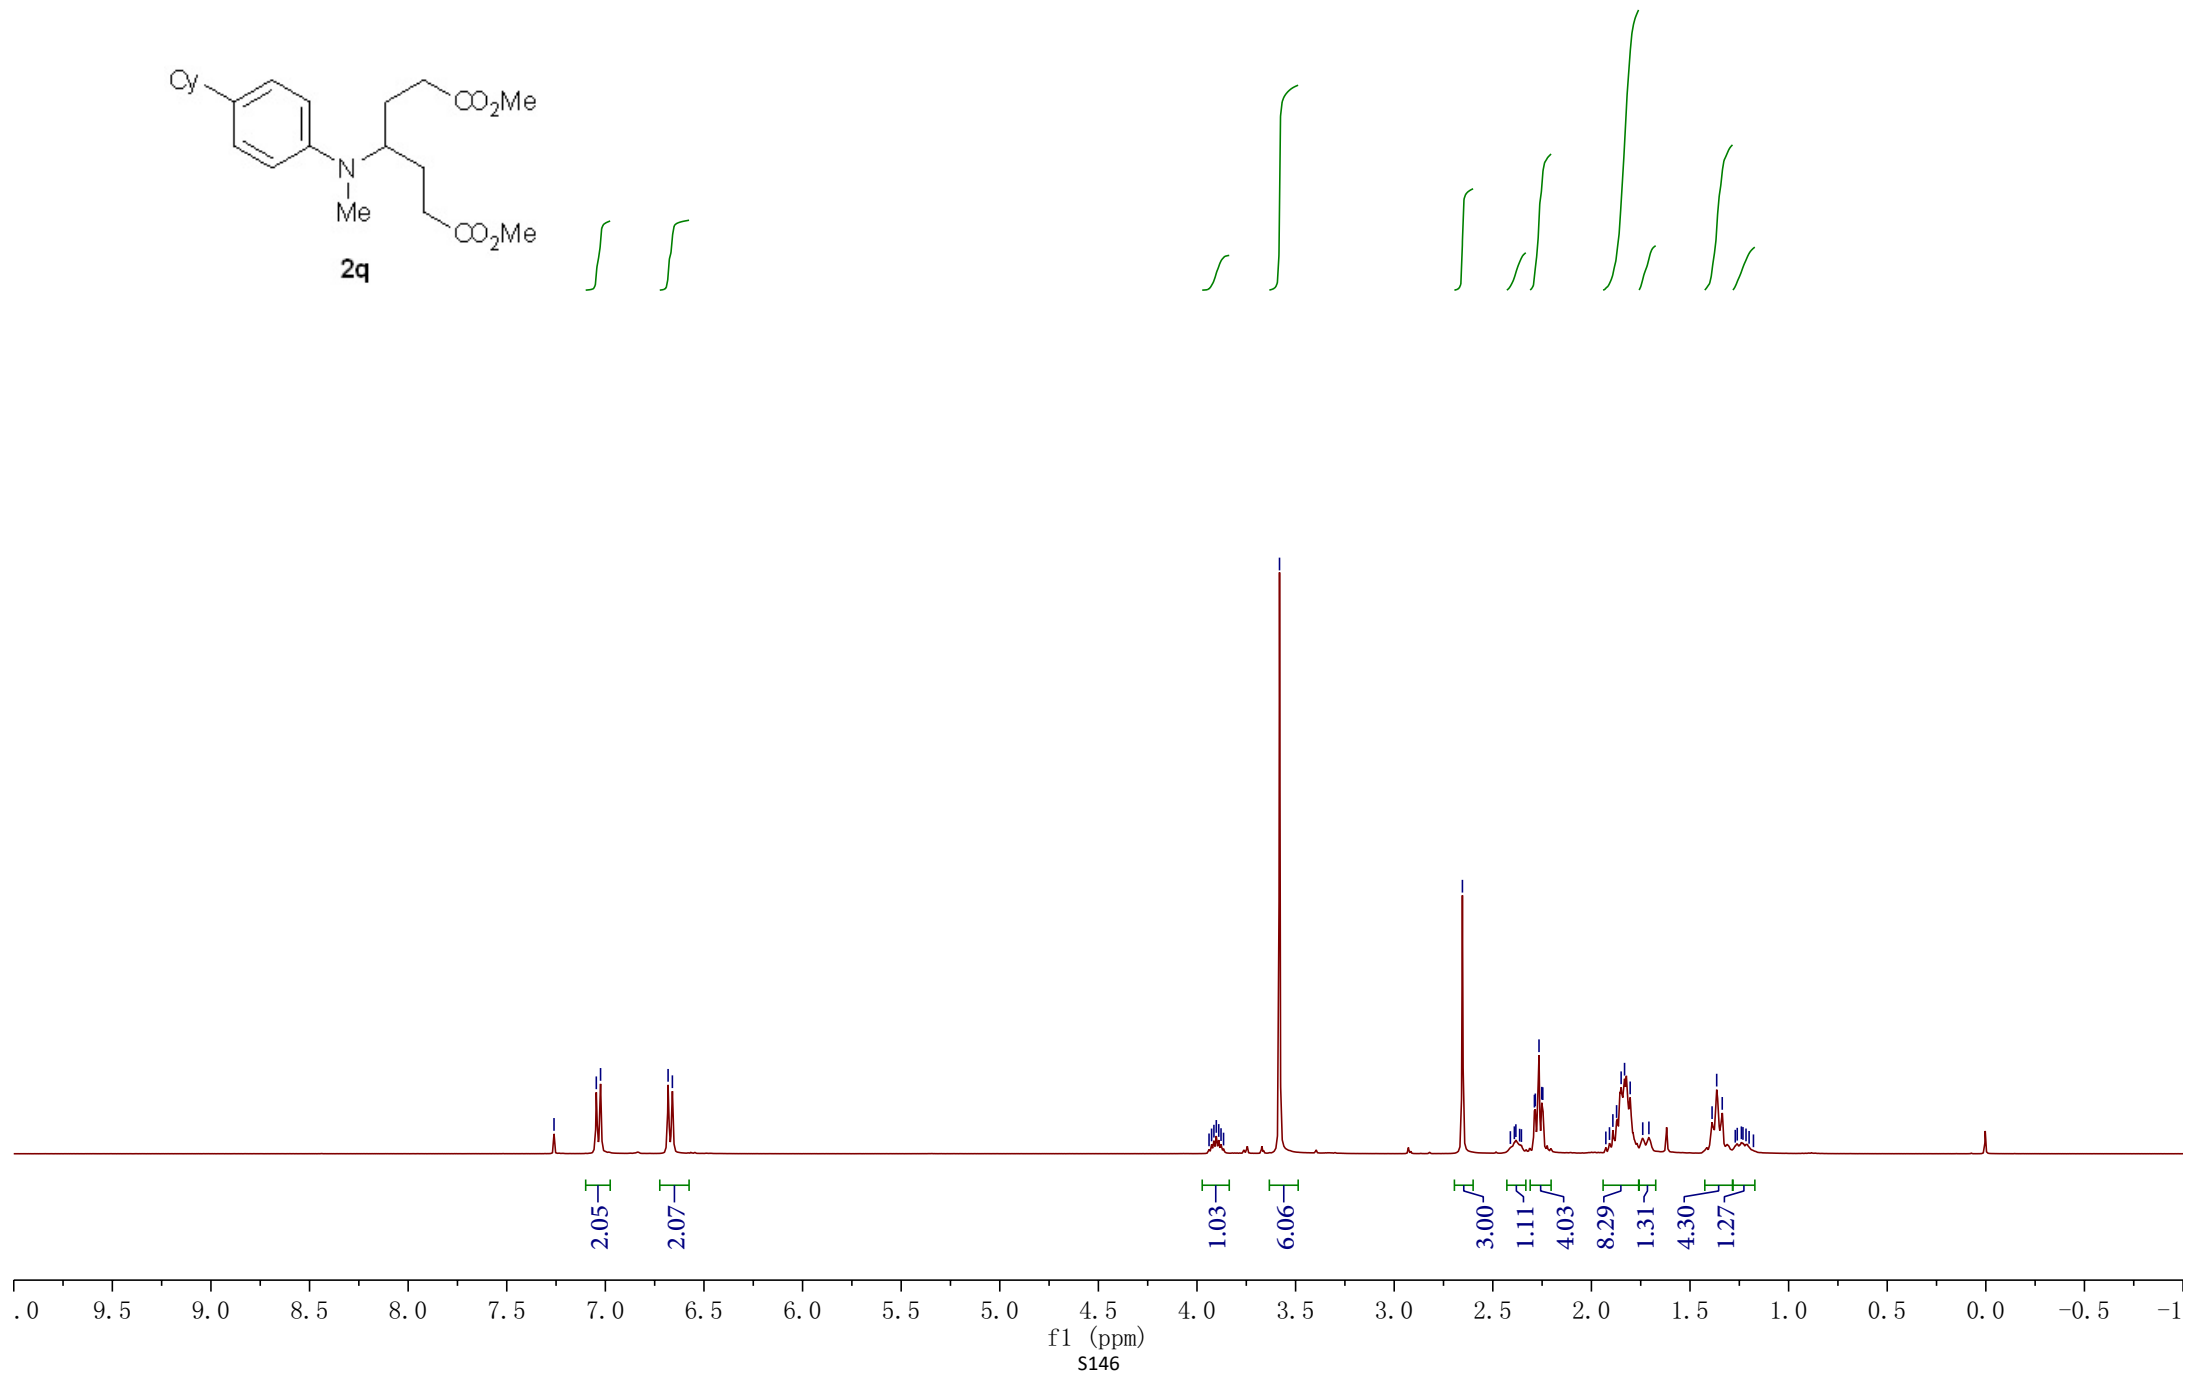

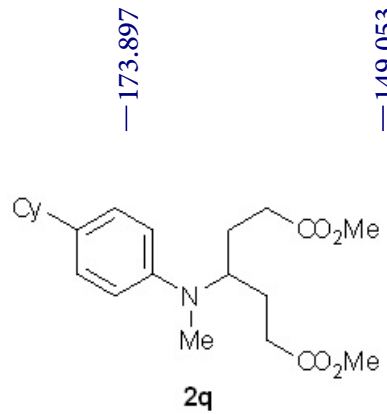

— 173.897

— 149.053

— 136.486

— 127.400

— 112.960

77.418

77.100

76.784

56.885

51.549

43.468

34.791

31.152

29.581

27.982

27.104

26.327

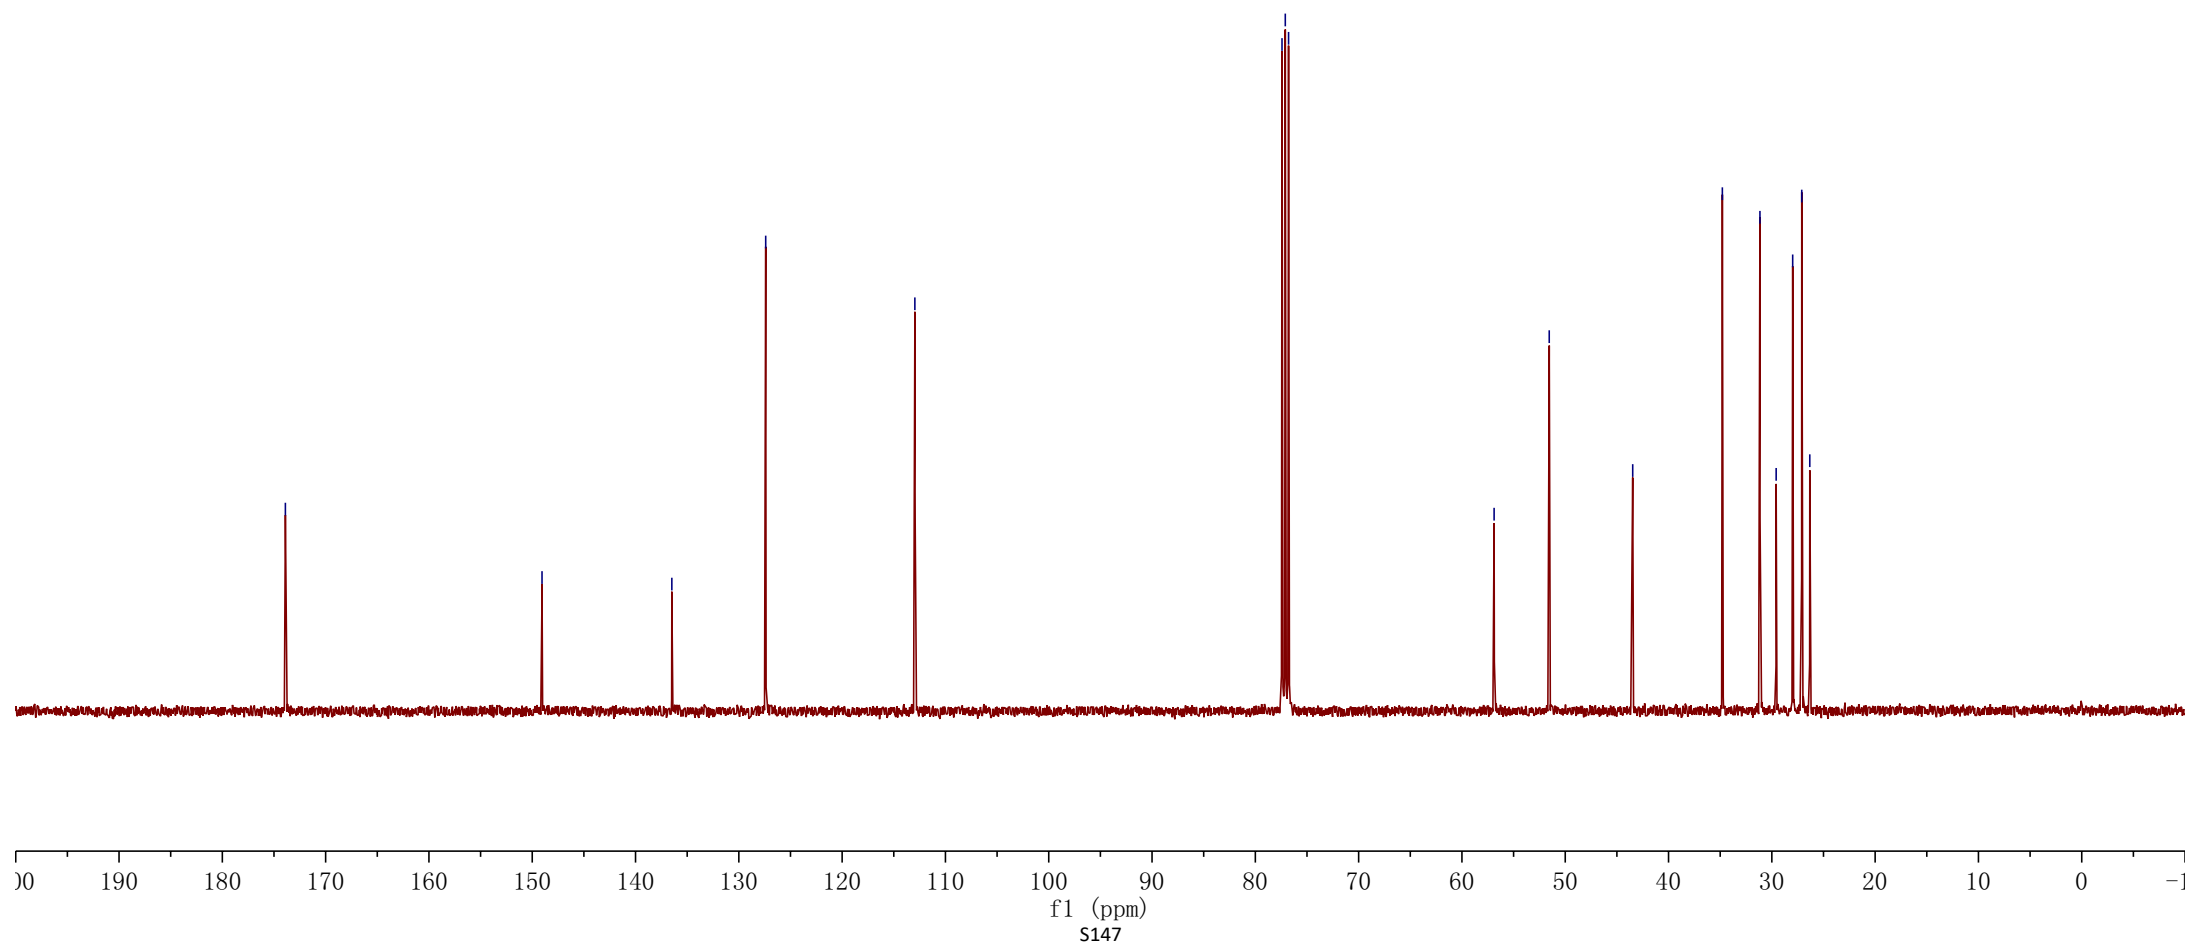

7.260  
6.943  
6.921  
6.661  
6.639  
3.924  
3.911  
3.899  
3.887  
3.875  
3.863  
3.850  
3.585  
2.643  
2.272  
2.269  
2.256  
2.250  
2.235  
2.231  
1.922  
1.904  
1.887  
1.868  
1.846  
1.827  
1.815  
1.794  
1.781  
1.760  
0.867  
0.856  
0.851  
0.846  
0.840  
0.835  
0.830  
0.819  
0.595  
0.584  
0.582  
0.579  
0.571  
0.567  
0.555

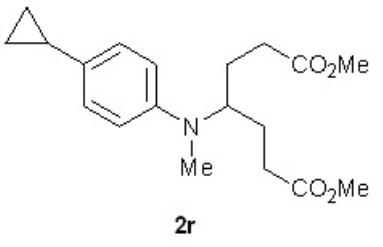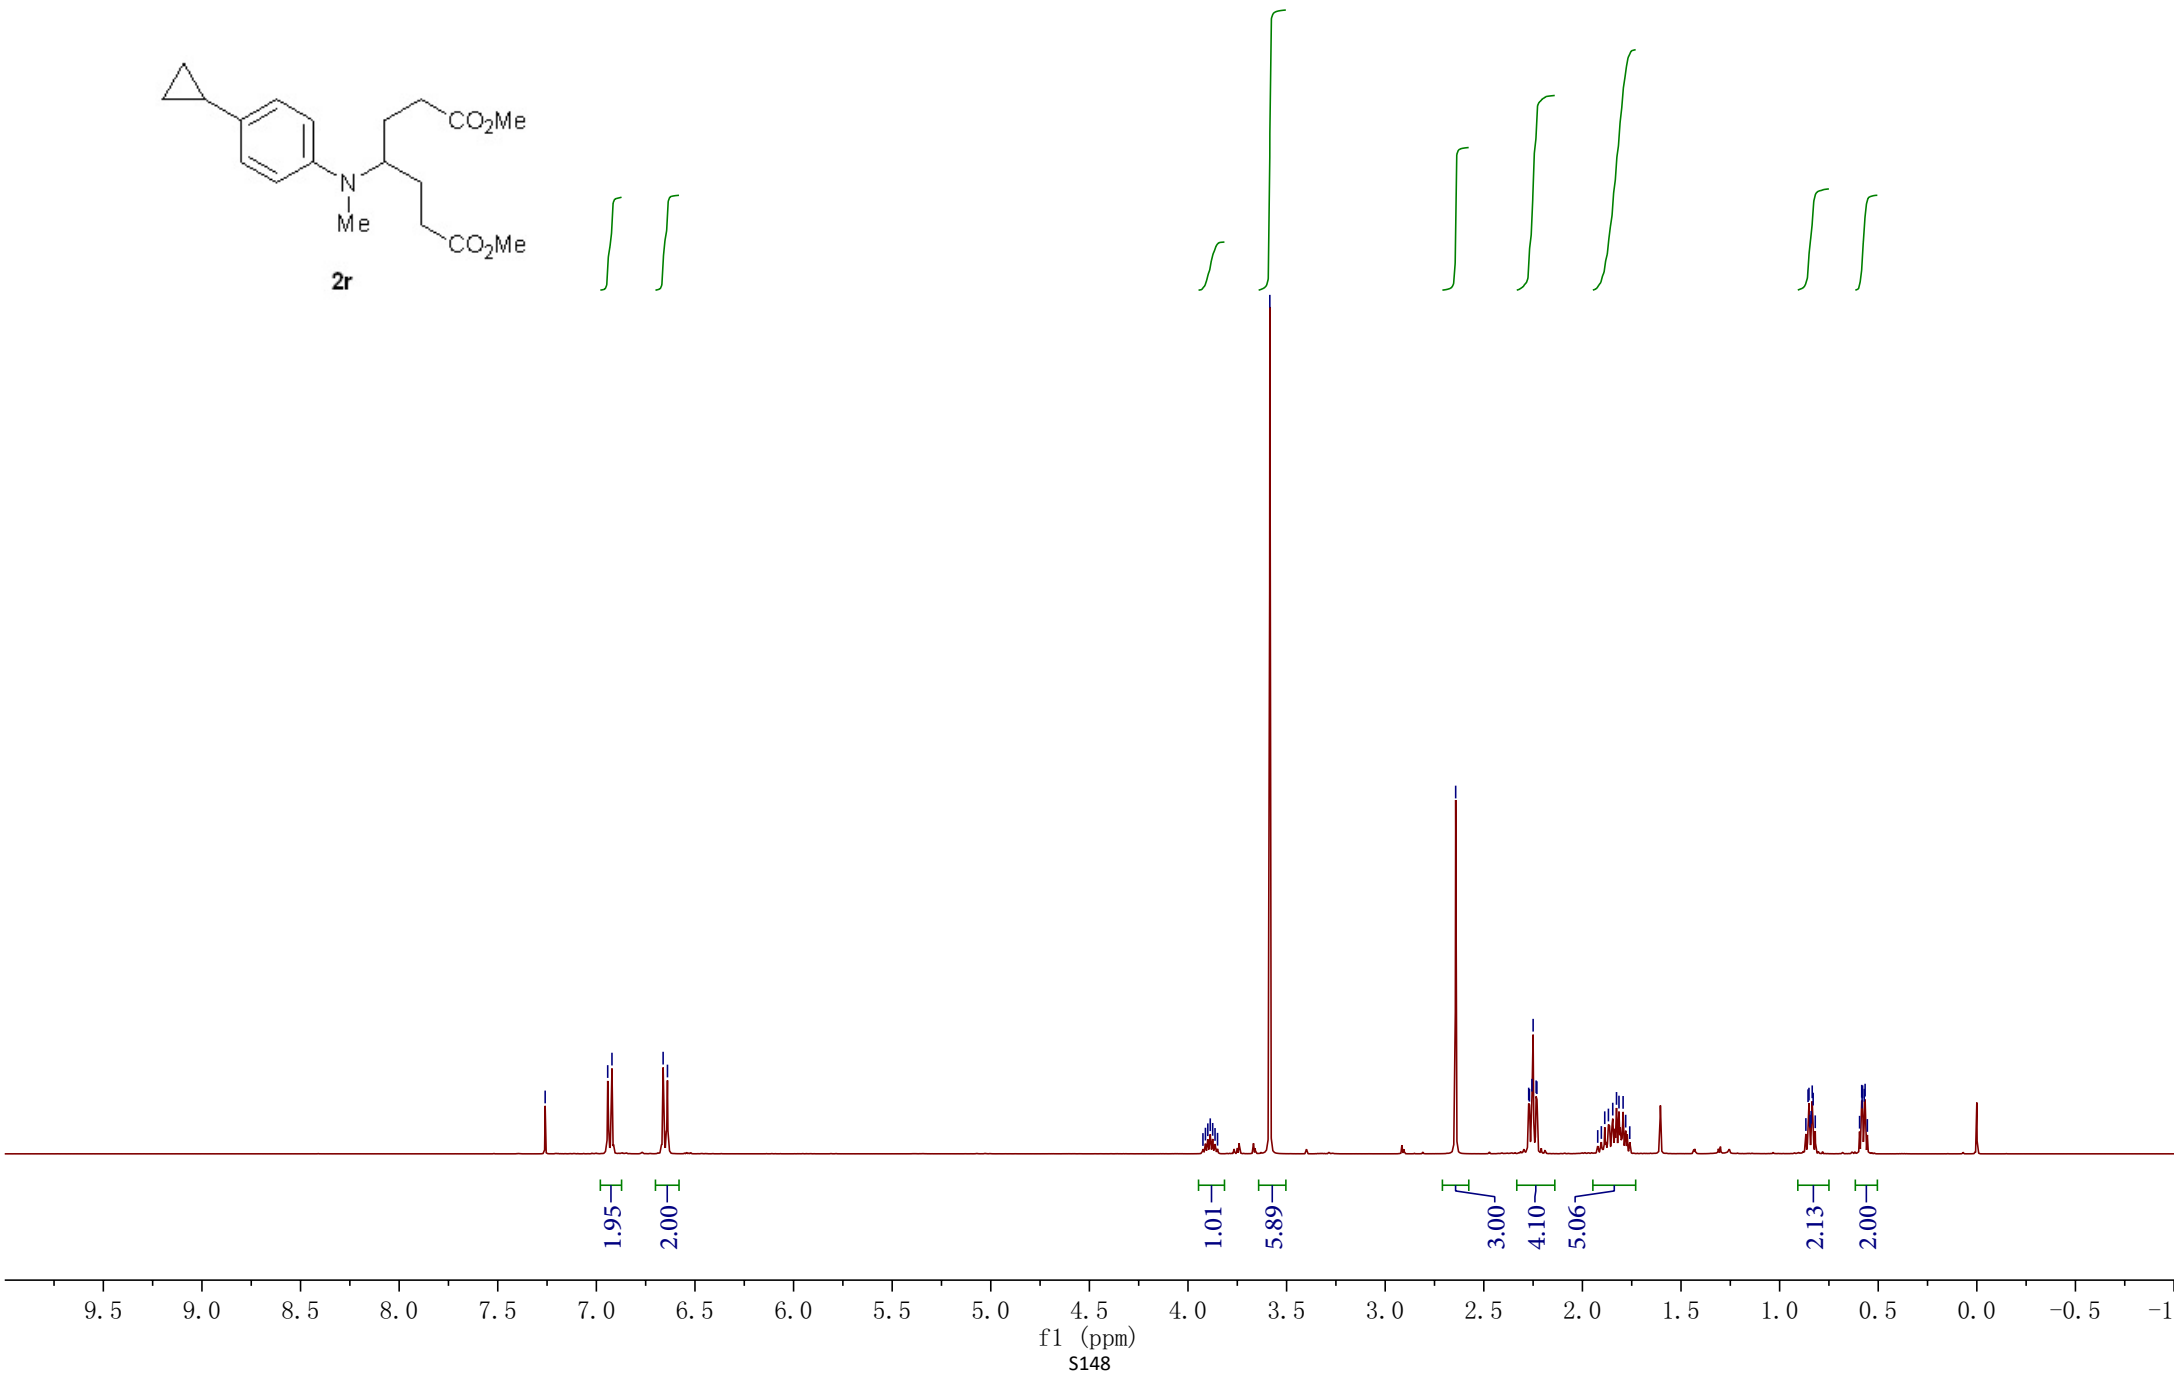

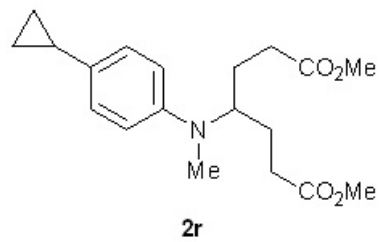

— 173.906

— 149.011

— 131.796

— 126.744

— 113.042

77.418

77.101

76.783

— 56.953

— 51.590

31.115

29.585

27.986

— 14.439

— 8.226

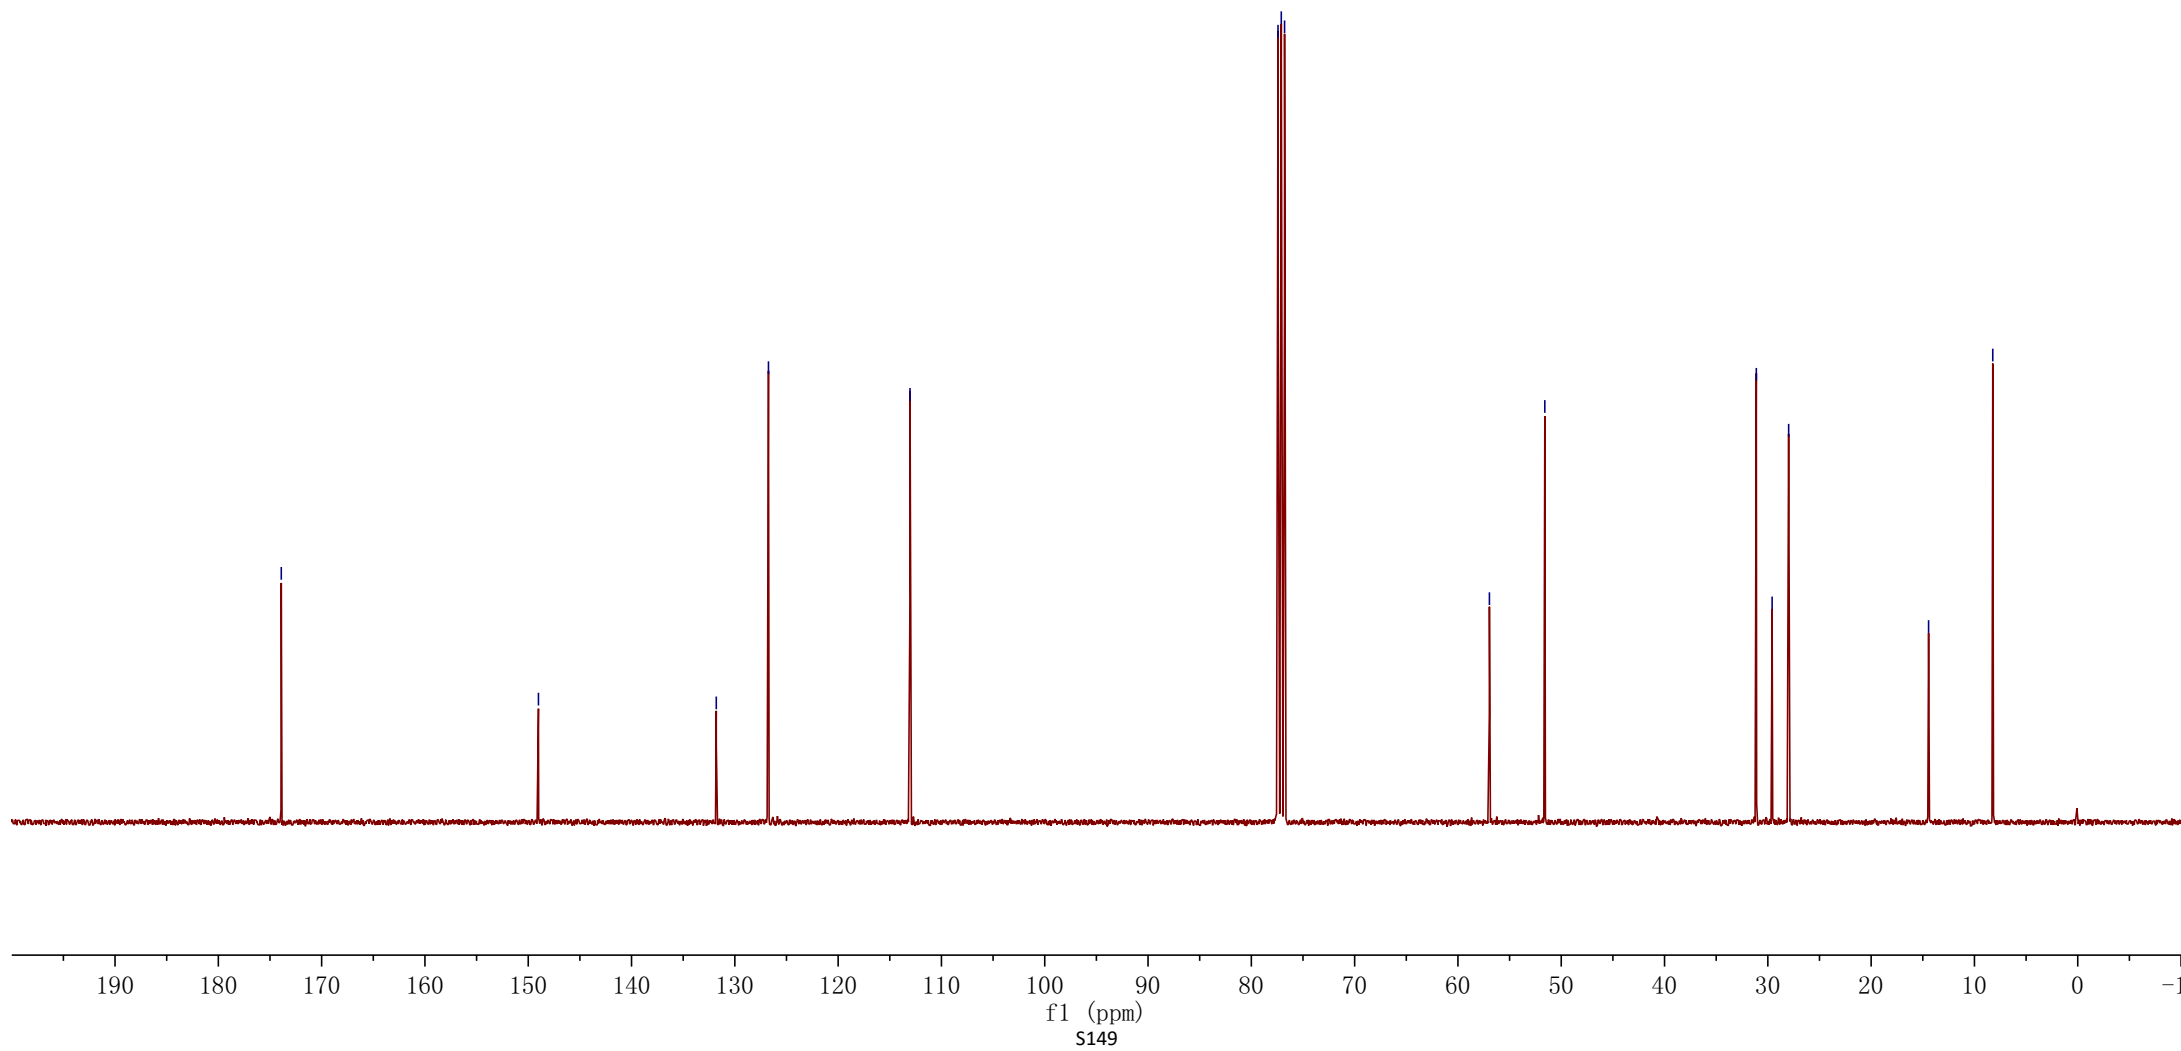

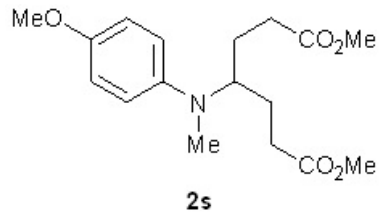

7.260  
6.804  
6.781  
6.708  
6.685

3.820  
3.807  
3.795  
3.783  
3.770  
3.758  
3.748  
3.737  
3.725  
3.588

2.622  
2.291  
2.284  
2.275  
2.270  
2.265  
2.254  
2.247  
1.897  
1.885  
1.866  
1.845  
1.826  
1.812  
1.800  
1.779

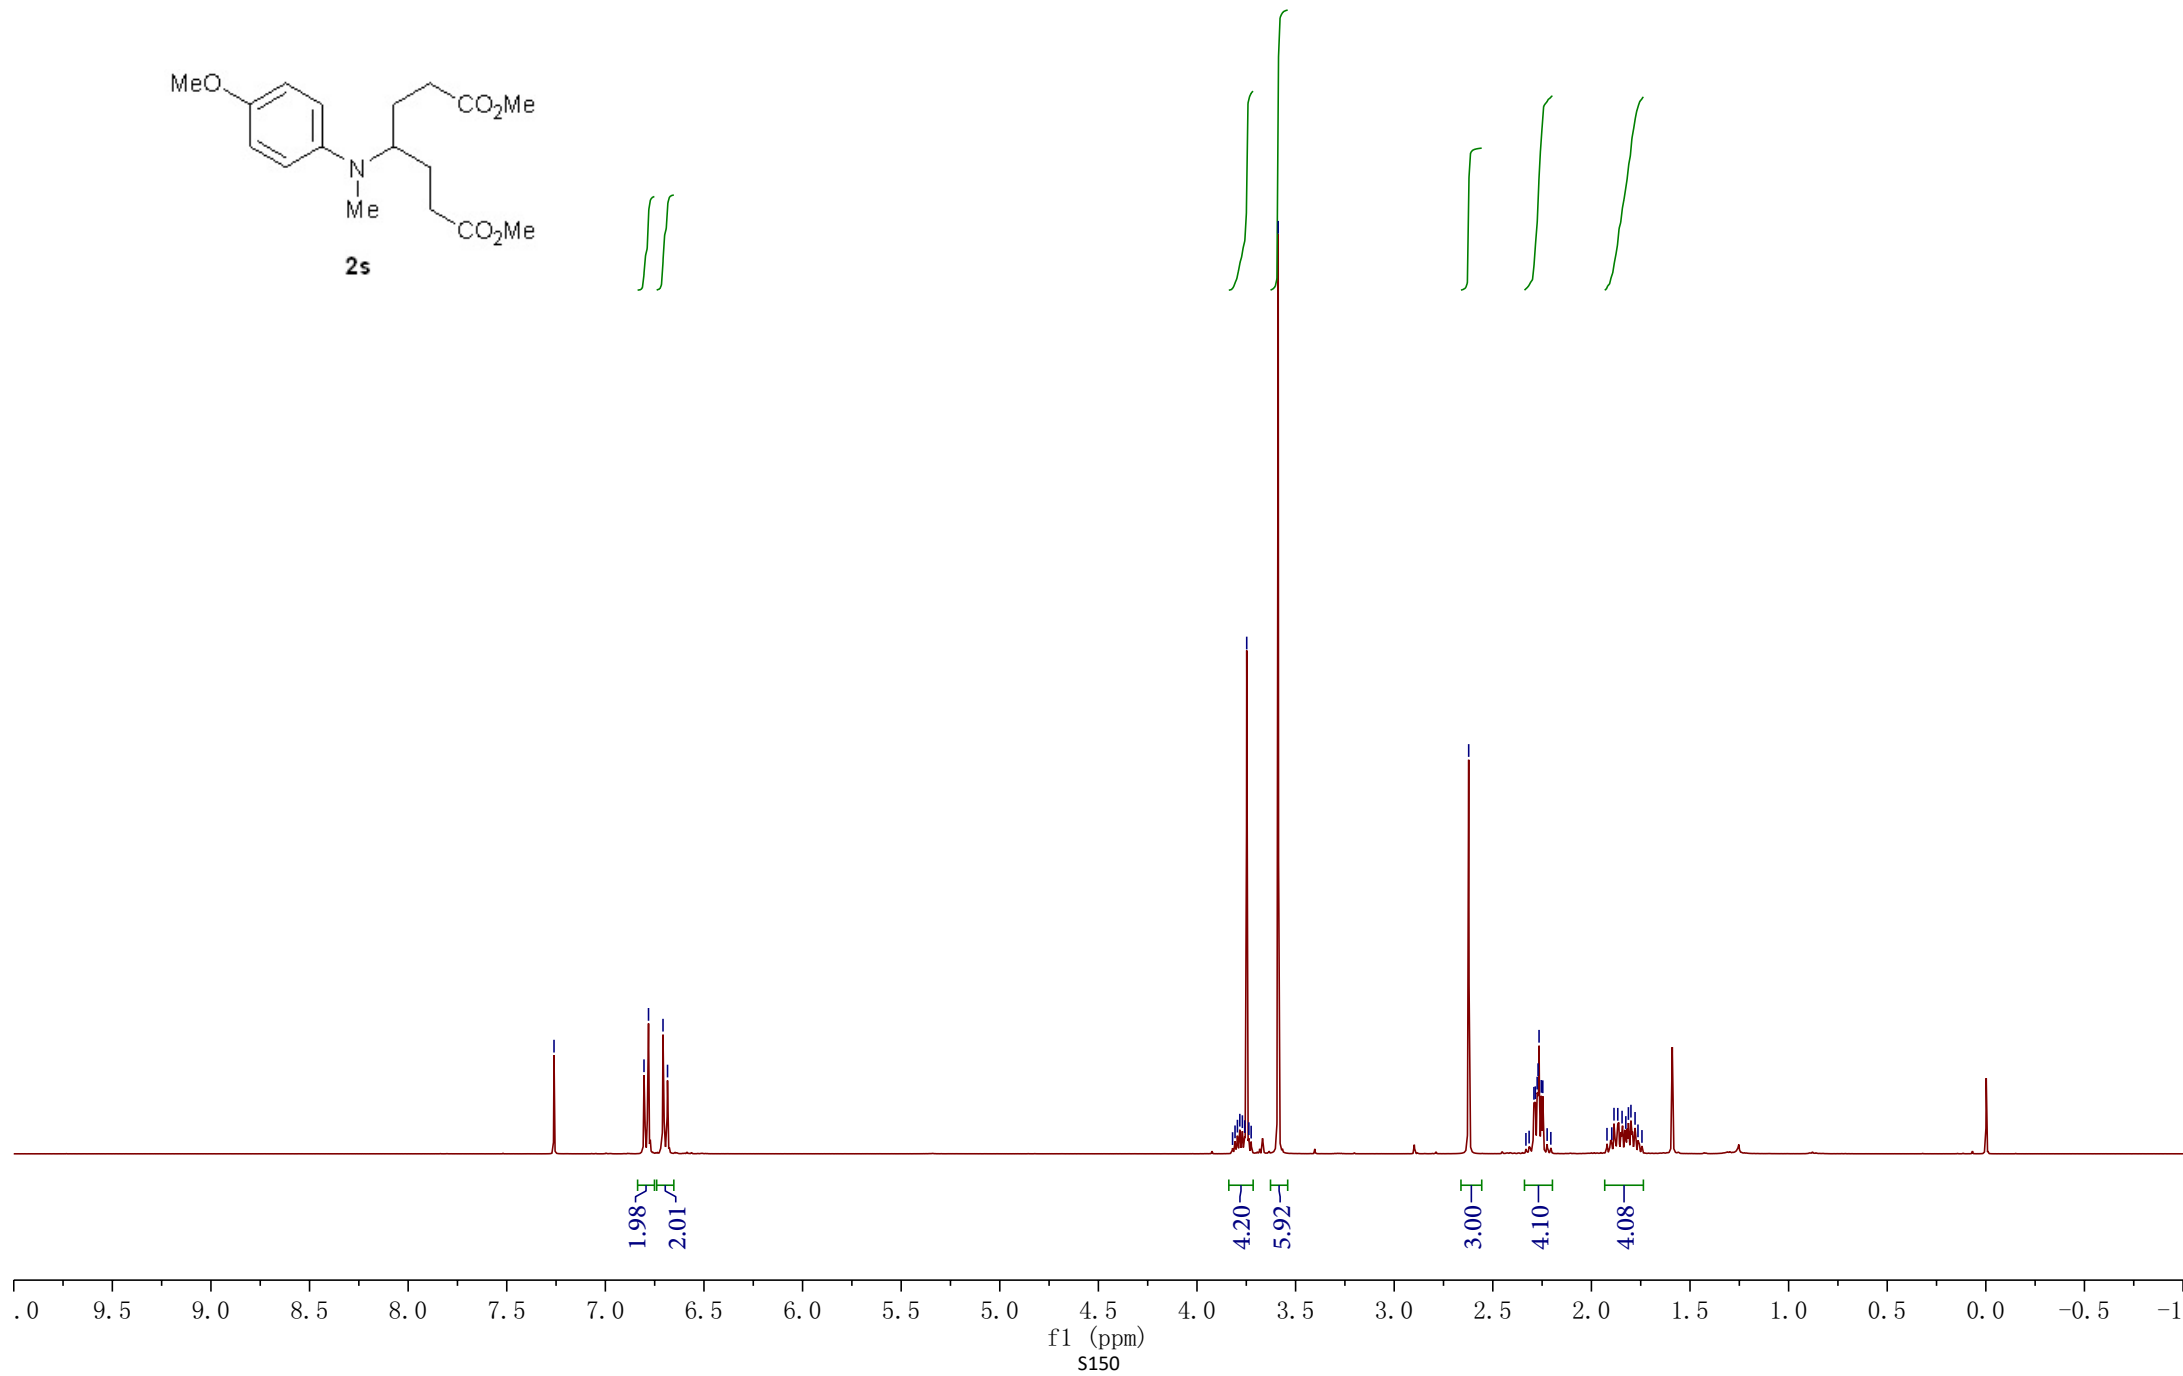

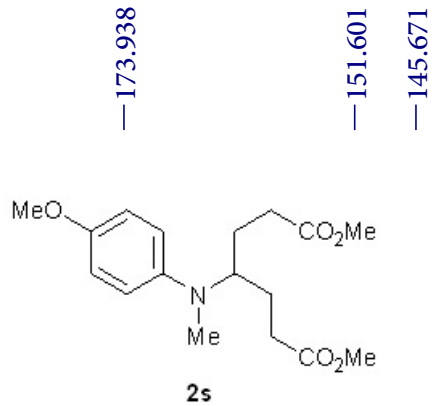

173.938

151.601

145.671

114.738

114.721

77.417

77.100

76.782

58.094

55.828

51.598

31.216

29.887

27.817

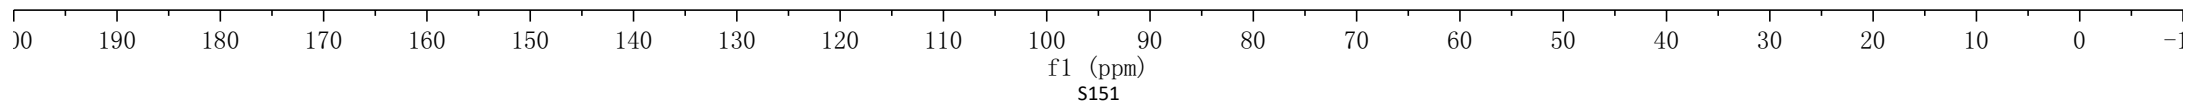

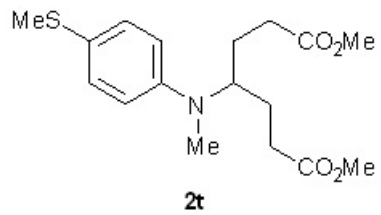

7.260  
7.232  
7.209  
6.689  
6.667

3.981  
3.967  
3.956  
3.944  
3.931  
3.920  
3.907  
3.583  
2.659  
2.408  
2.264  
2.244  
2.227  
1.929  
1.911  
1.893  
1.875  
1.818  
1.796  
1.783

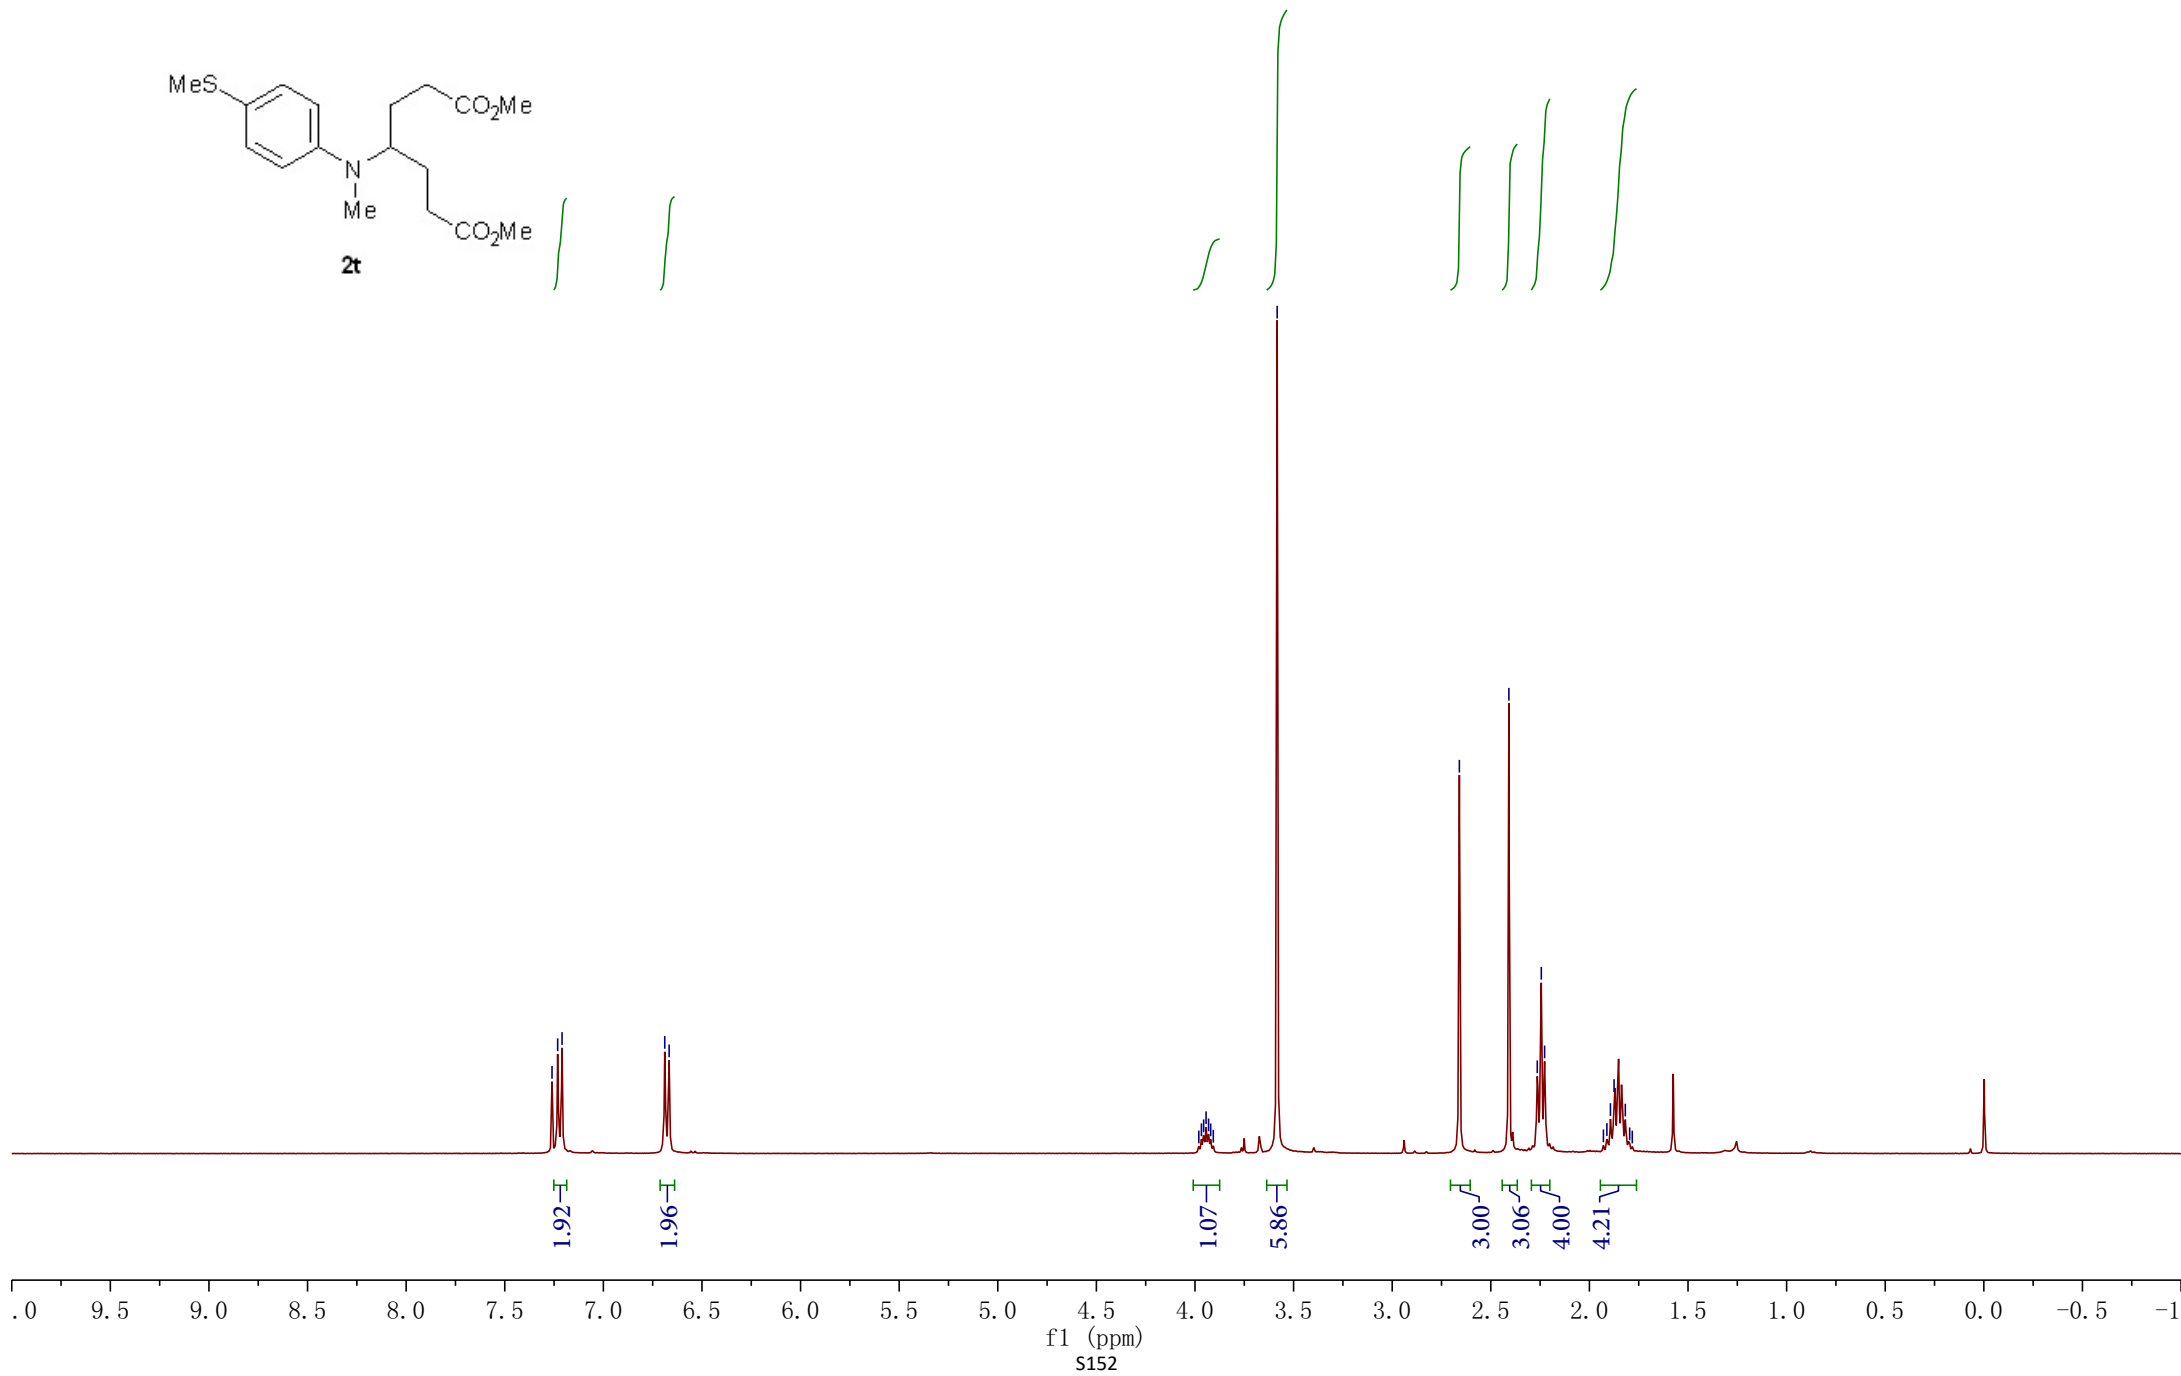



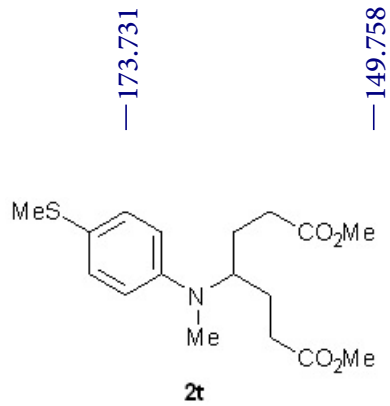

- 173.731
- 149.758
- 131.369
- 123.586
- 113.368
- 77.418
- 77.100
- 76.783
- 56.661
- 51.619
- 31.018
- 29.623
- 28.049
- 19.085

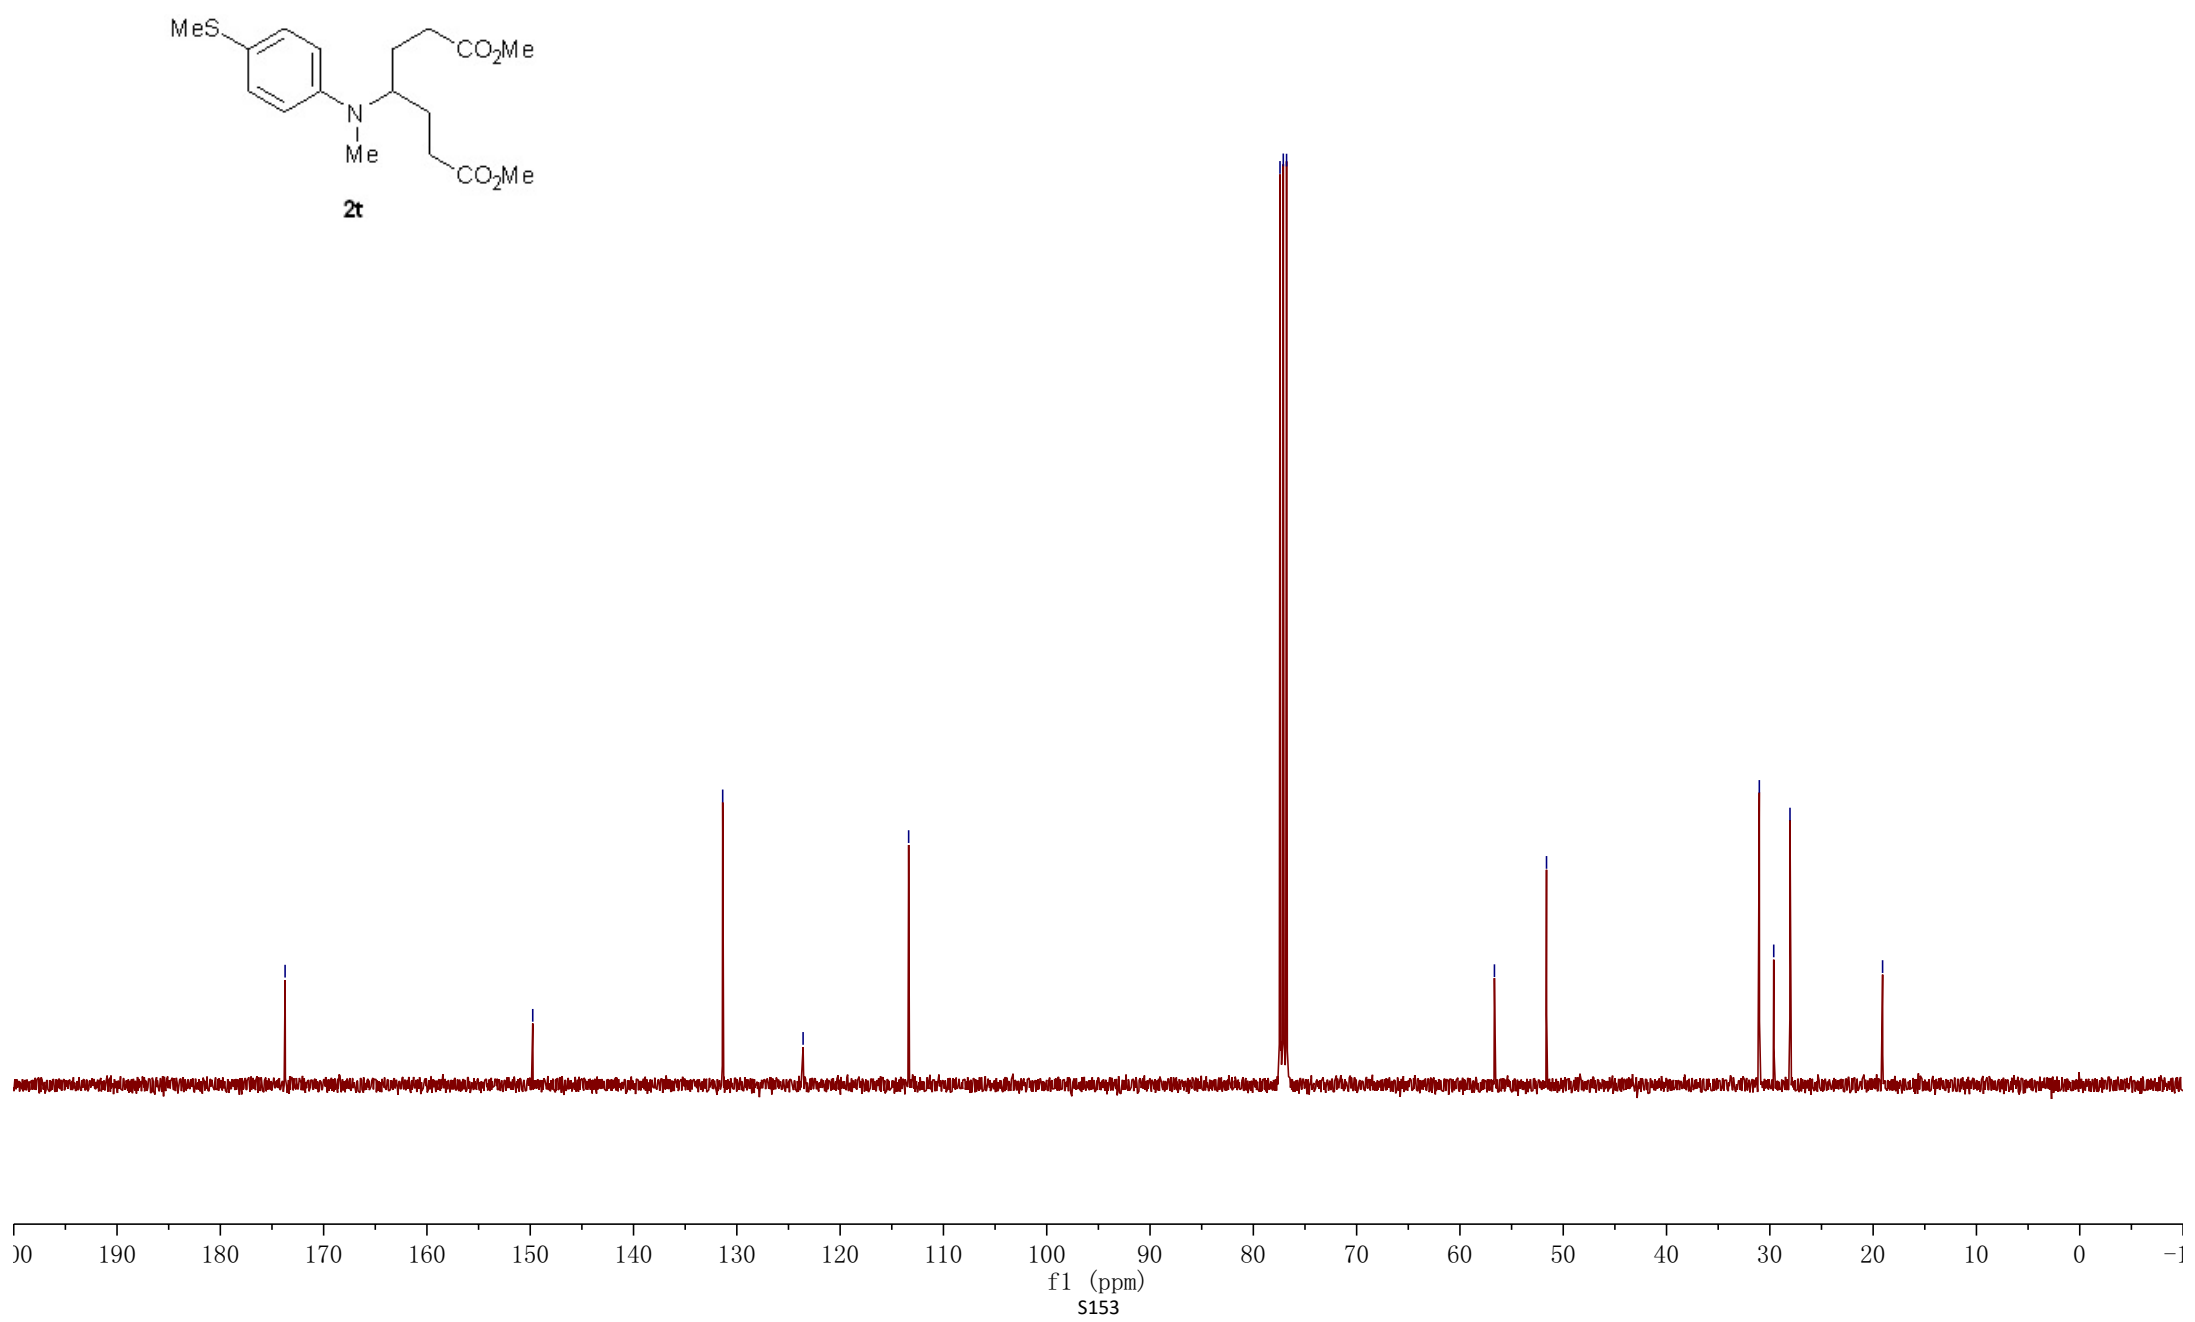

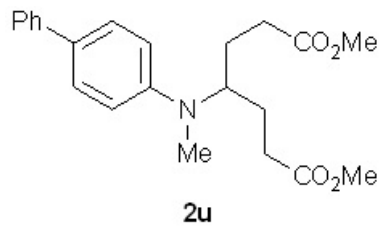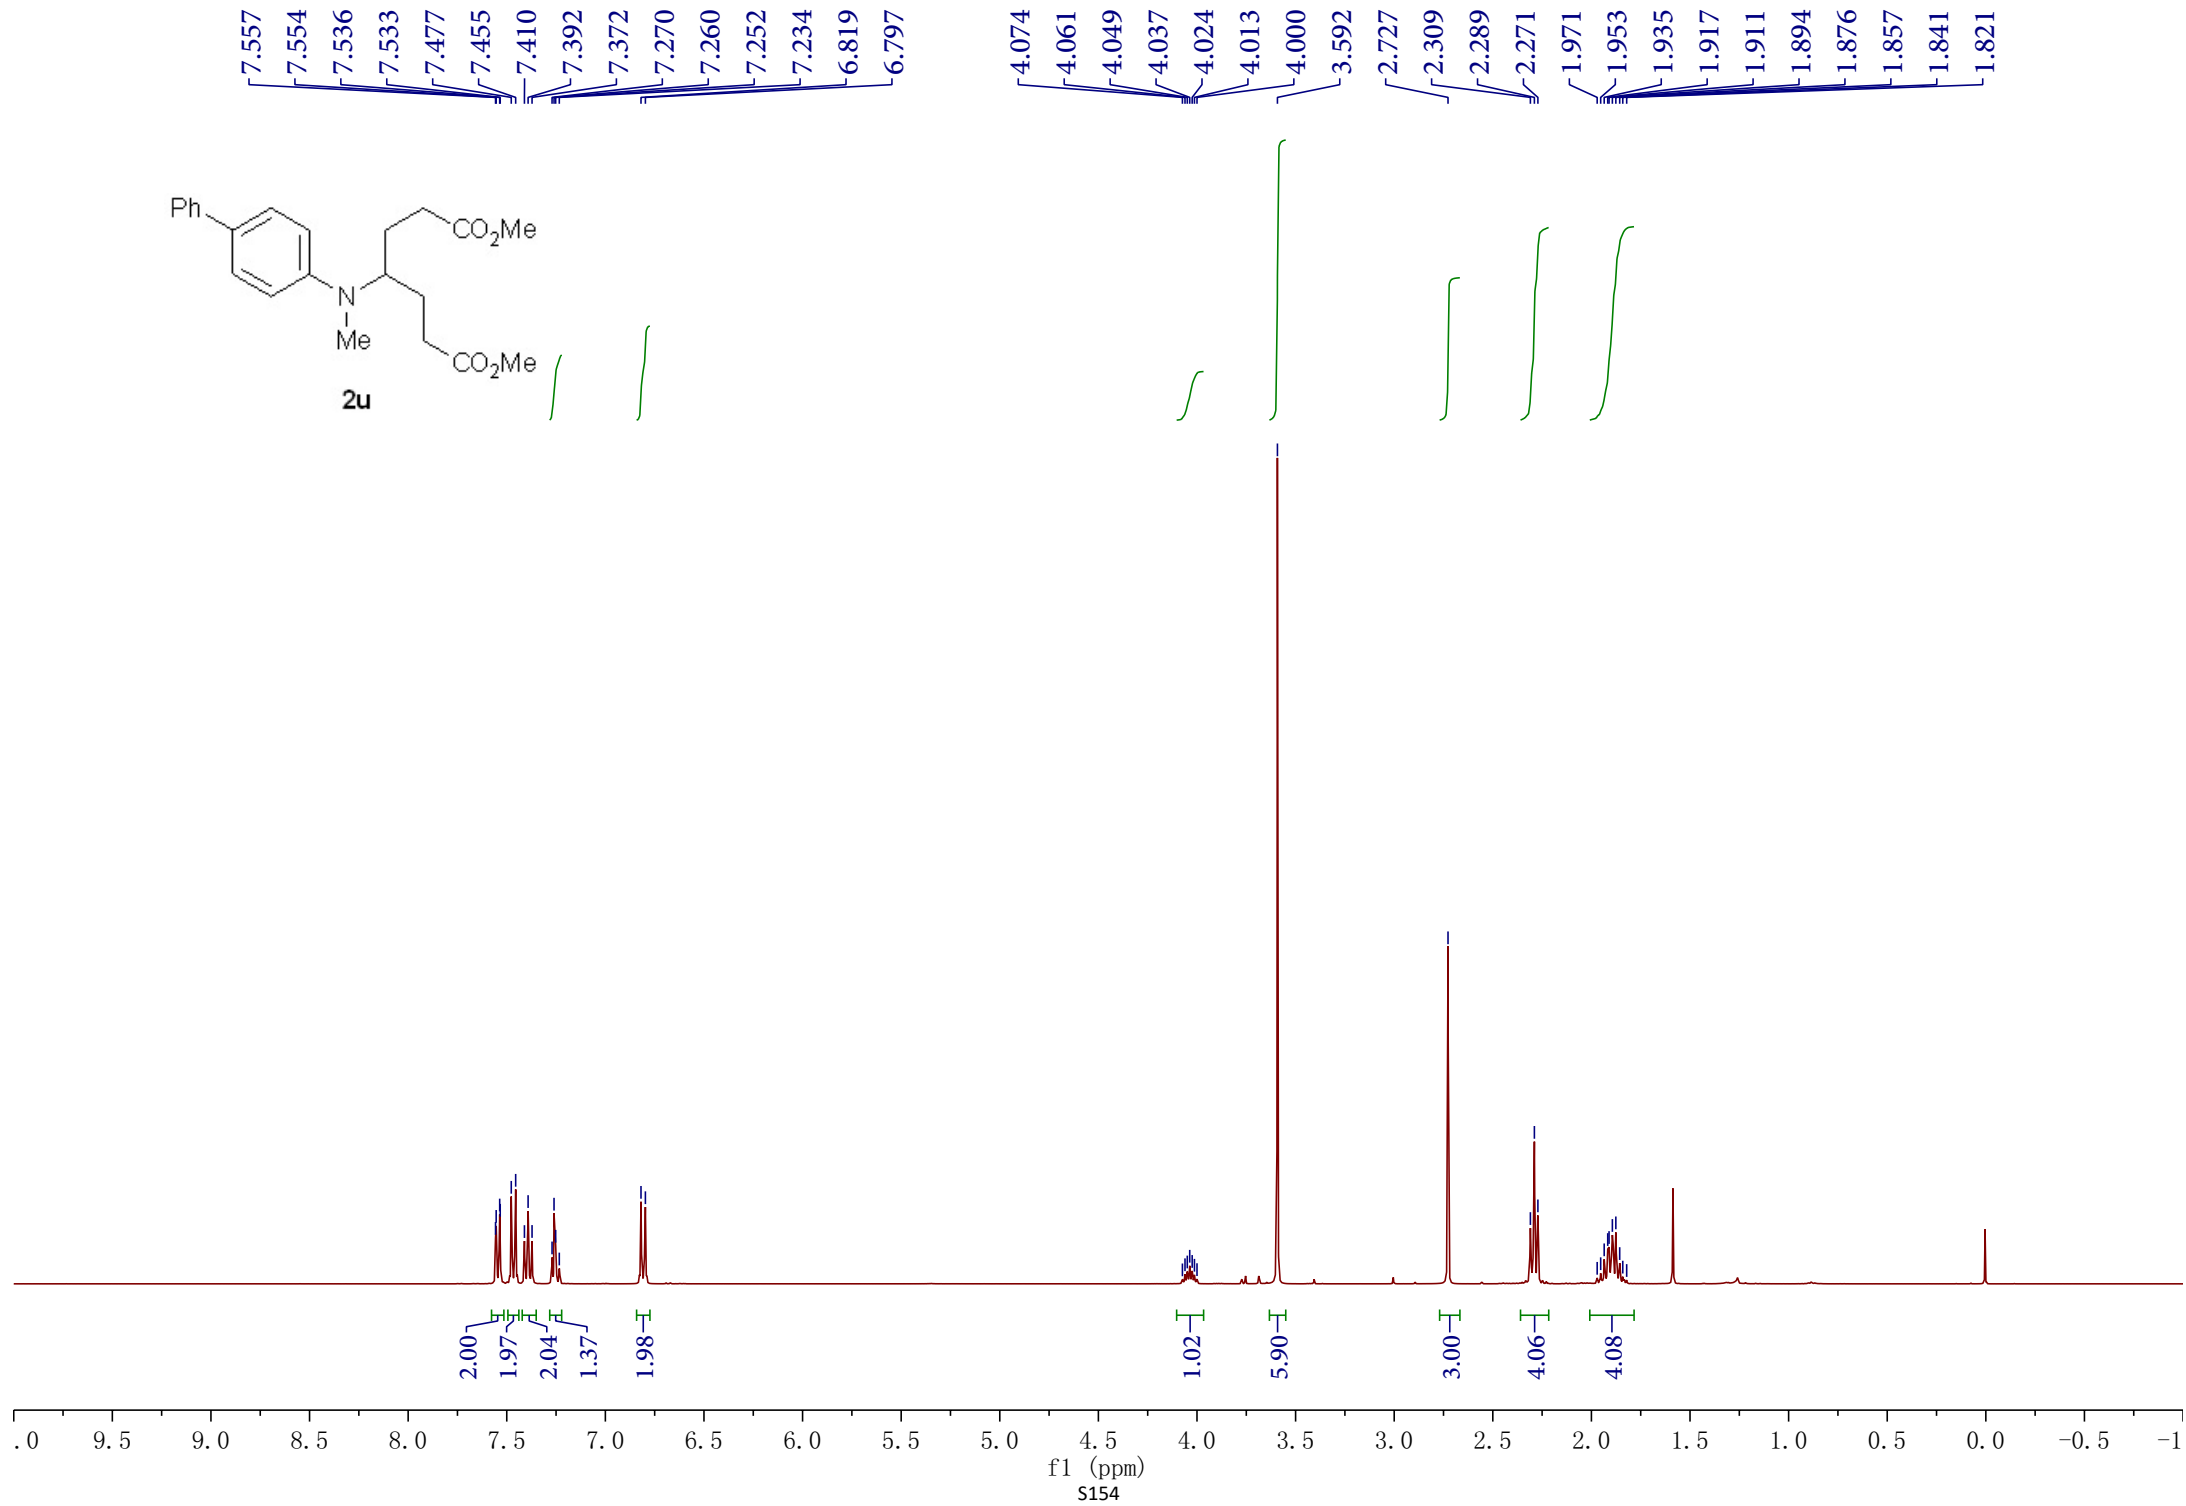

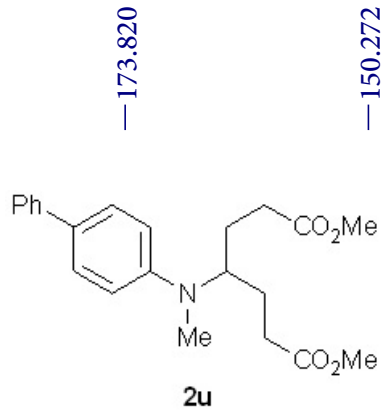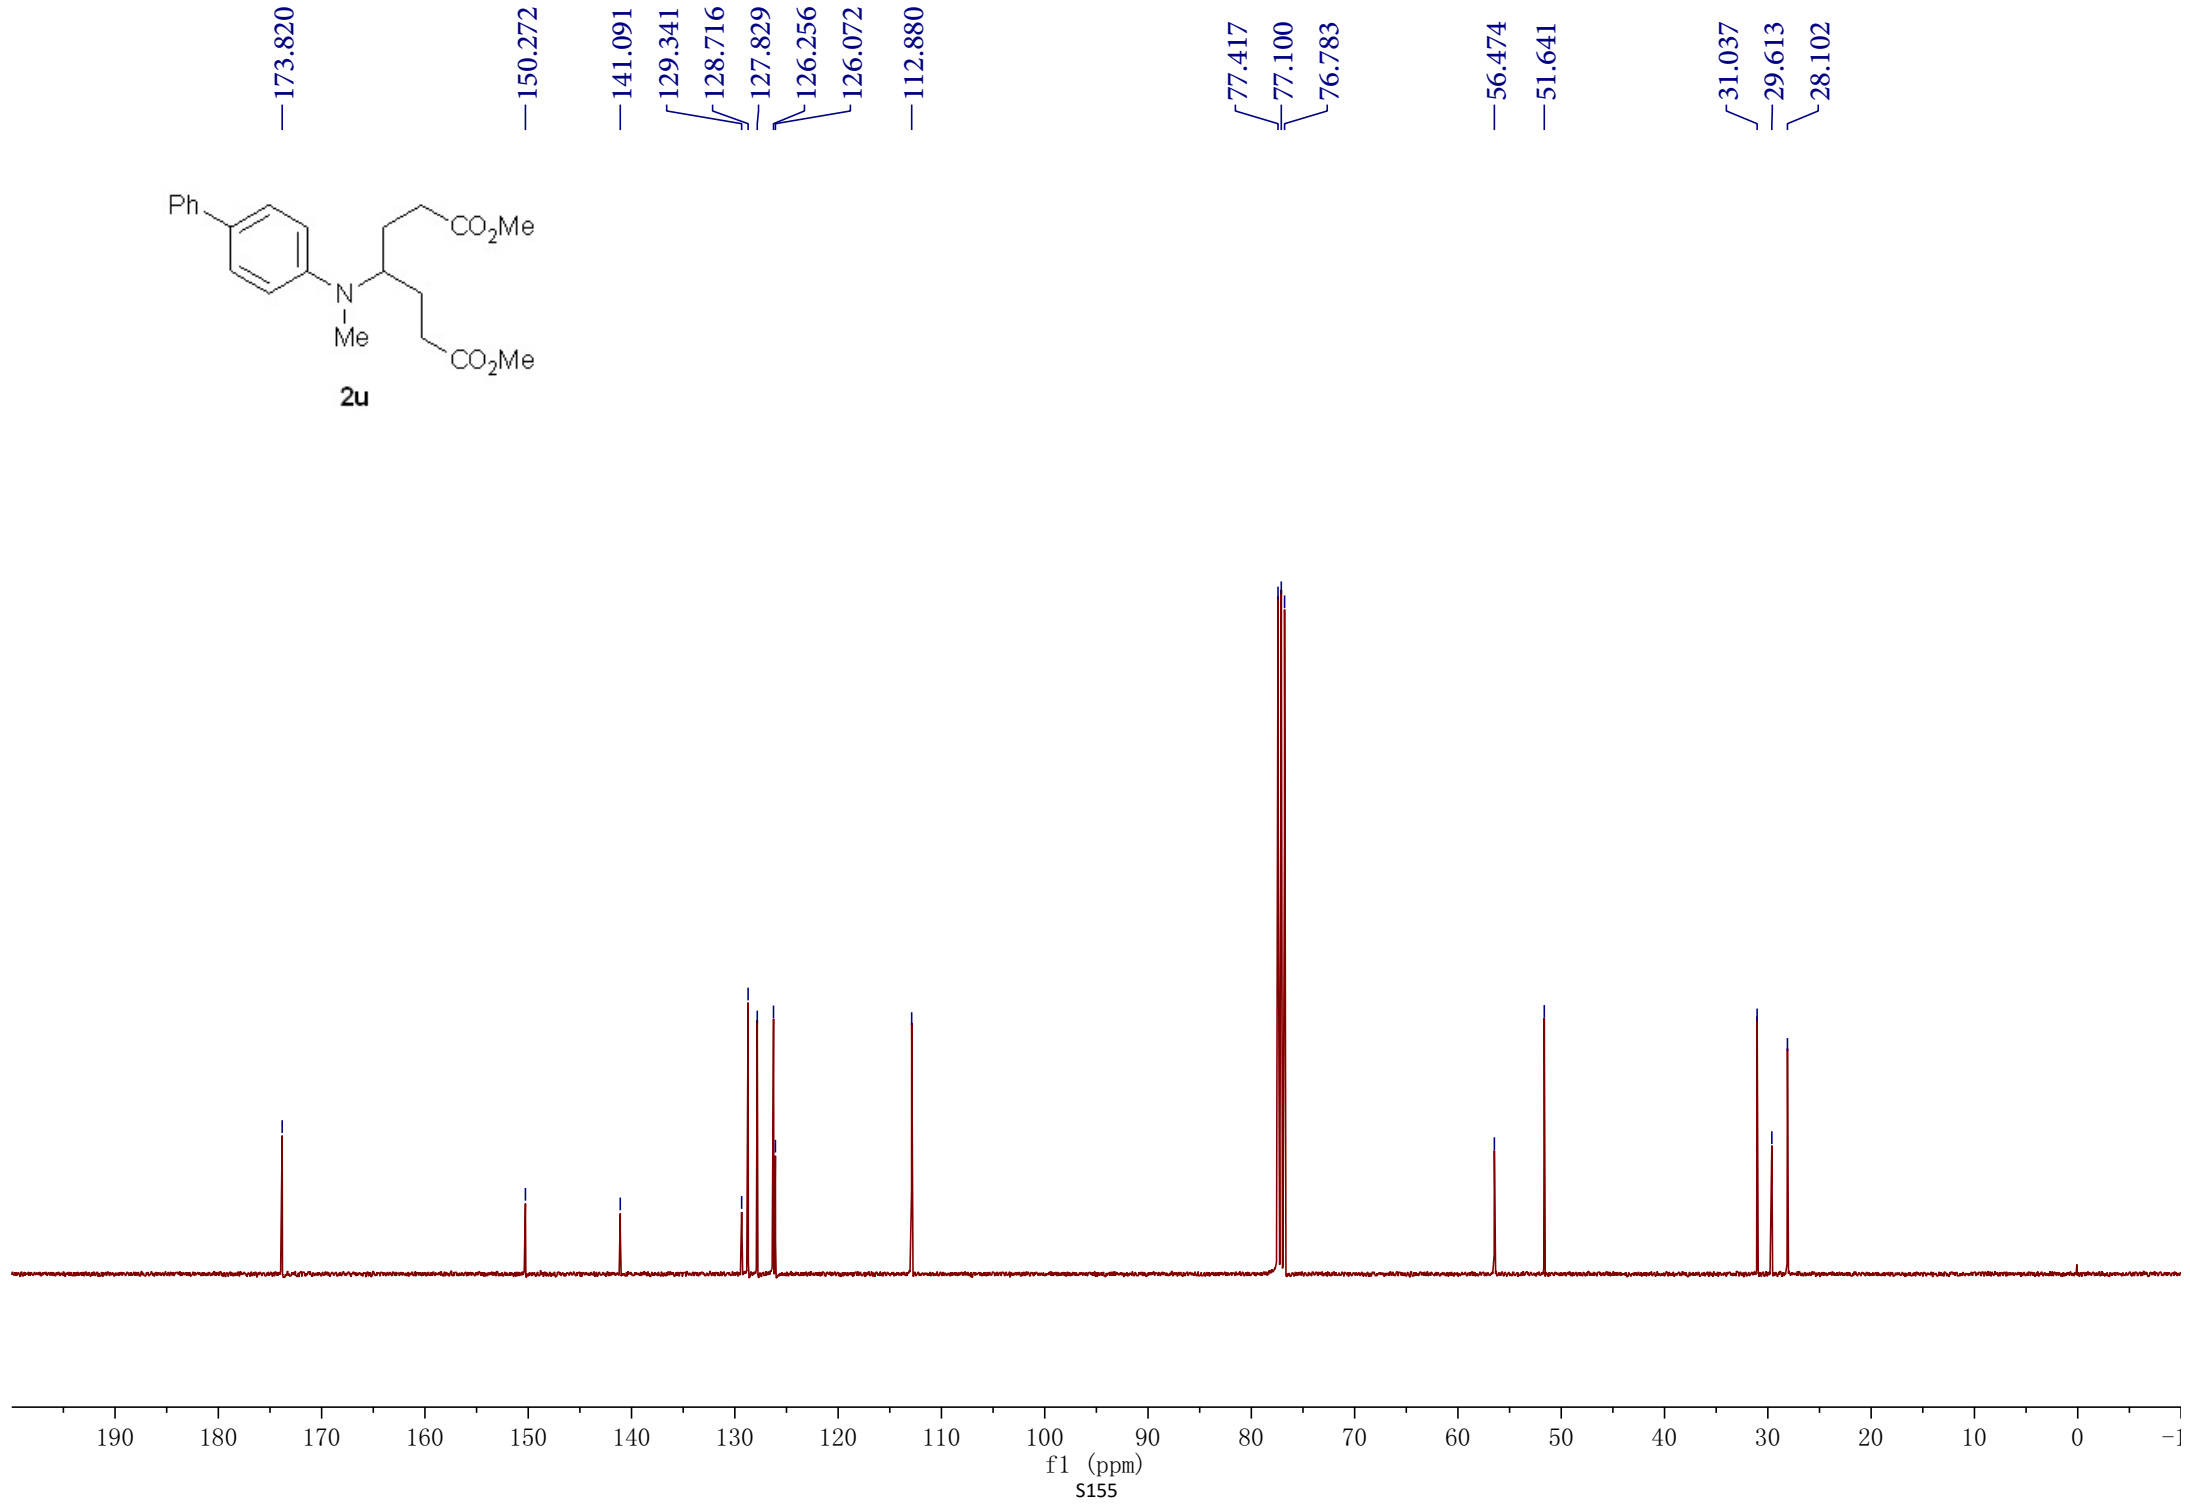

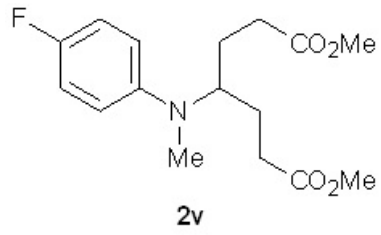

7.260  
6.917  
6.896  
6.894  
6.873  
6.677  
6.666  
6.660  
6.654  
6.643

3.885  
3.872  
3.860  
3.848  
3.835  
3.824  
3.811  
3.581

2.630  
2.274  
2.268  
2.258  
2.254  
2.249  
2.237  
2.230  
1.921  
1.903  
1.886  
1.862  
1.843  
1.830  
1.817  
1.797  
1.780

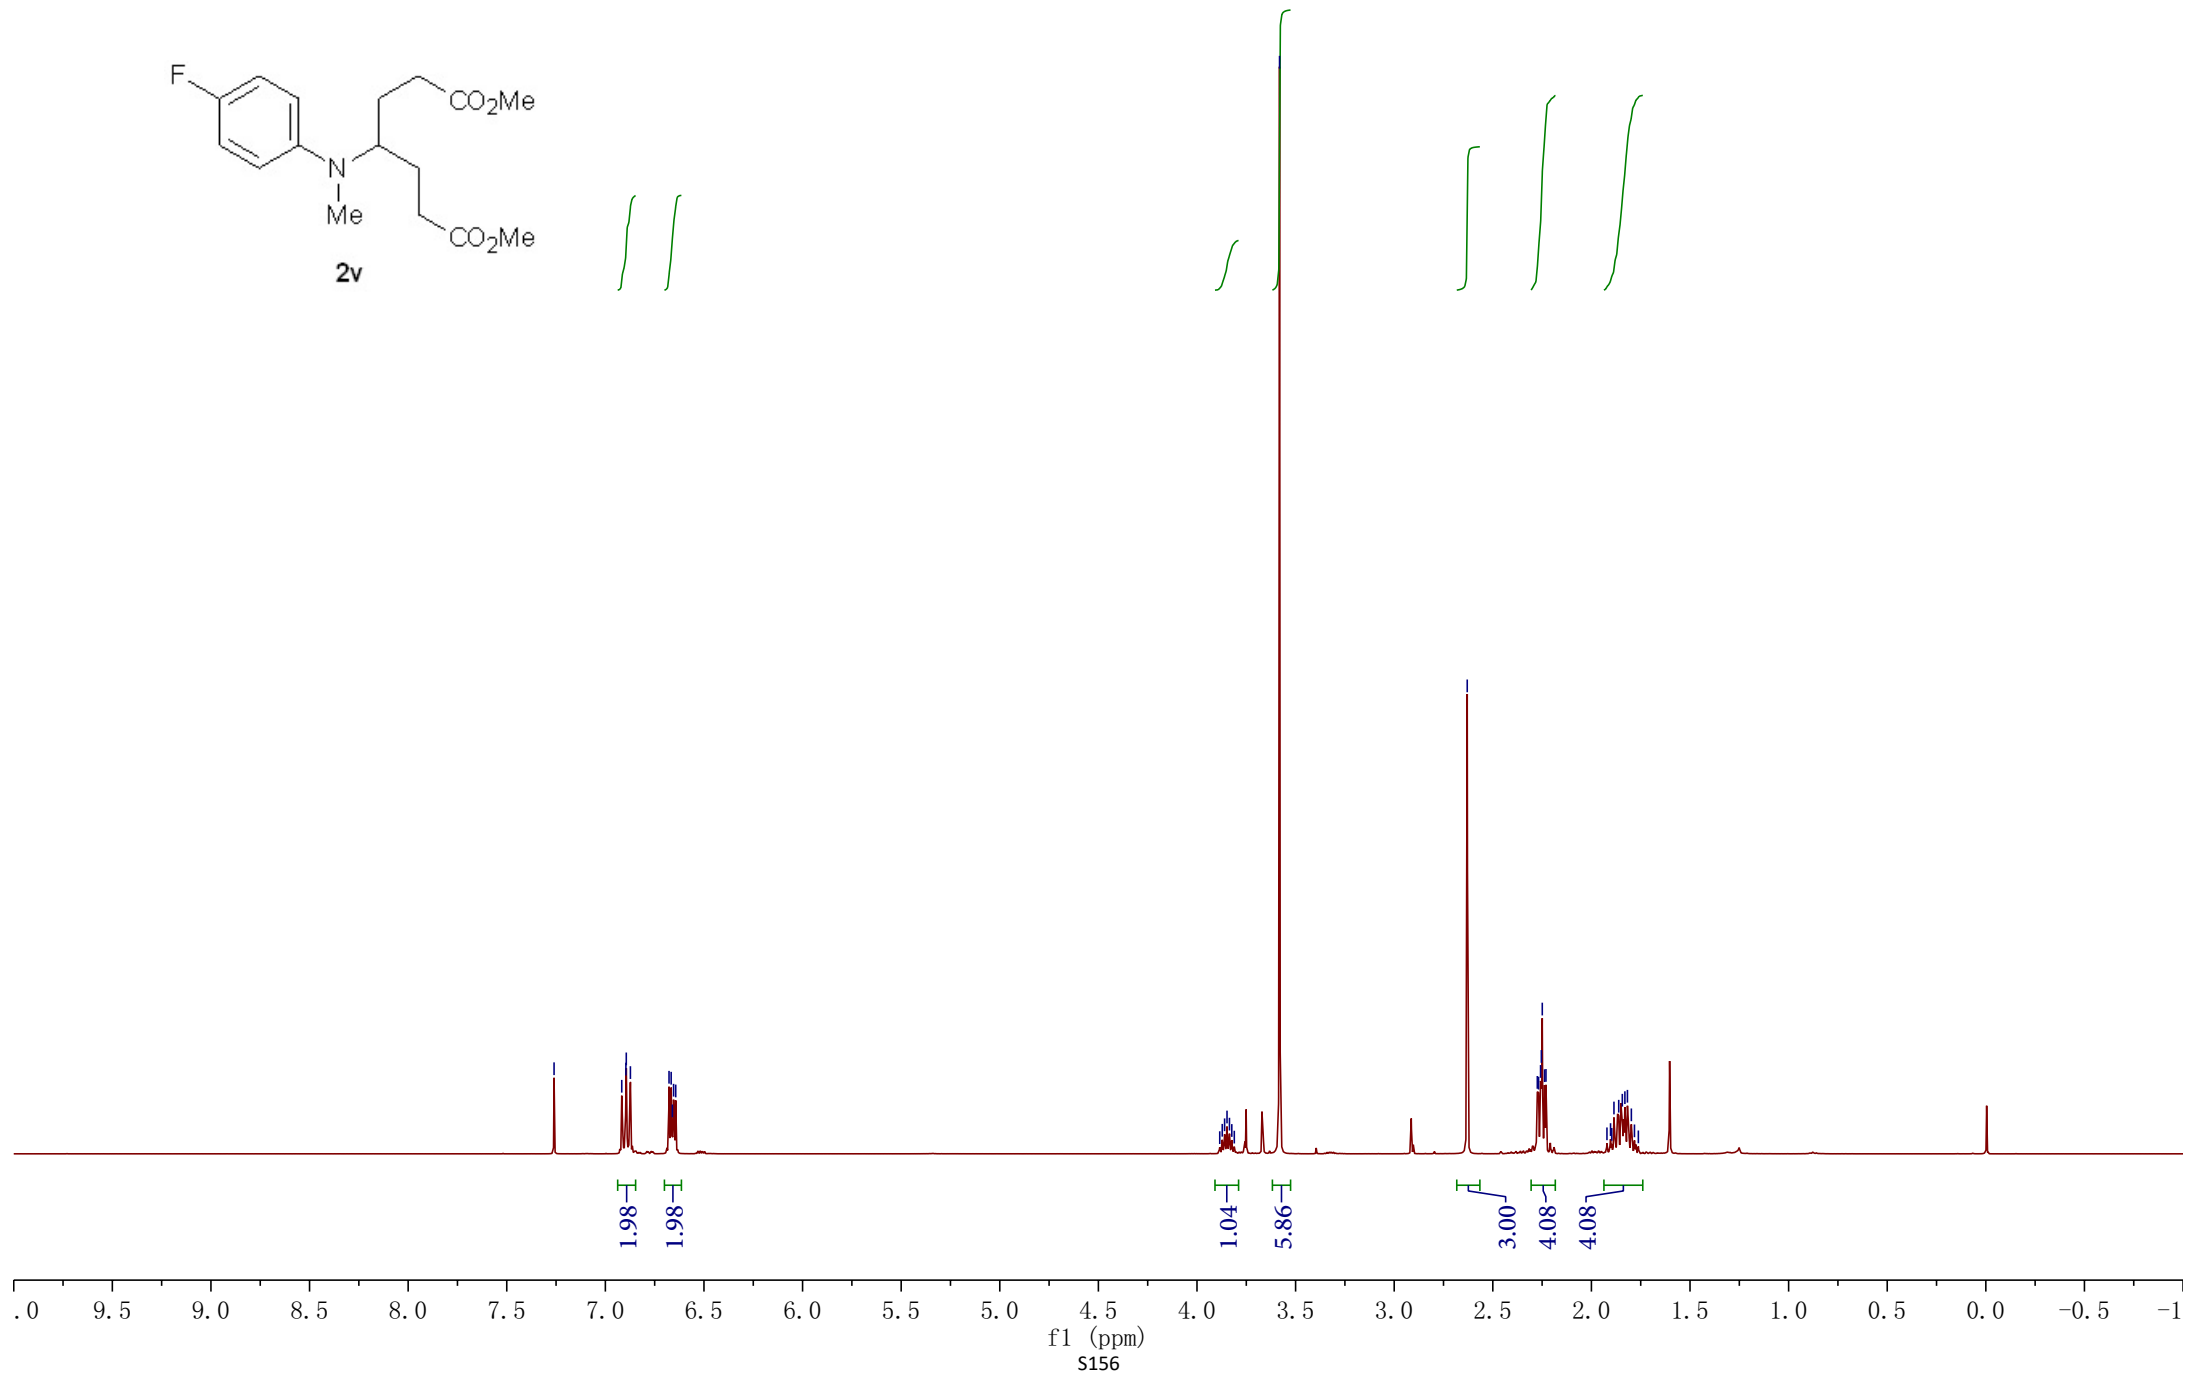

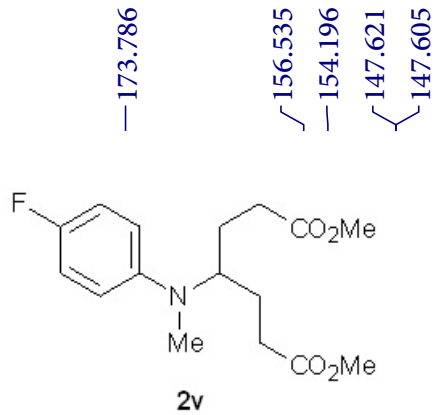

— 173.786

∩ 156.535

— 154.196

∩ 147.621

∩ 147.605

∩ 115.630

∩ 115.410

∩ 114.069

∩ 113.996

∩ 77.417

∩ 77.100

∩ 76.782

— 57.683

— 51.622

∩ 31.070

∩ 29.865

∩ 27.907

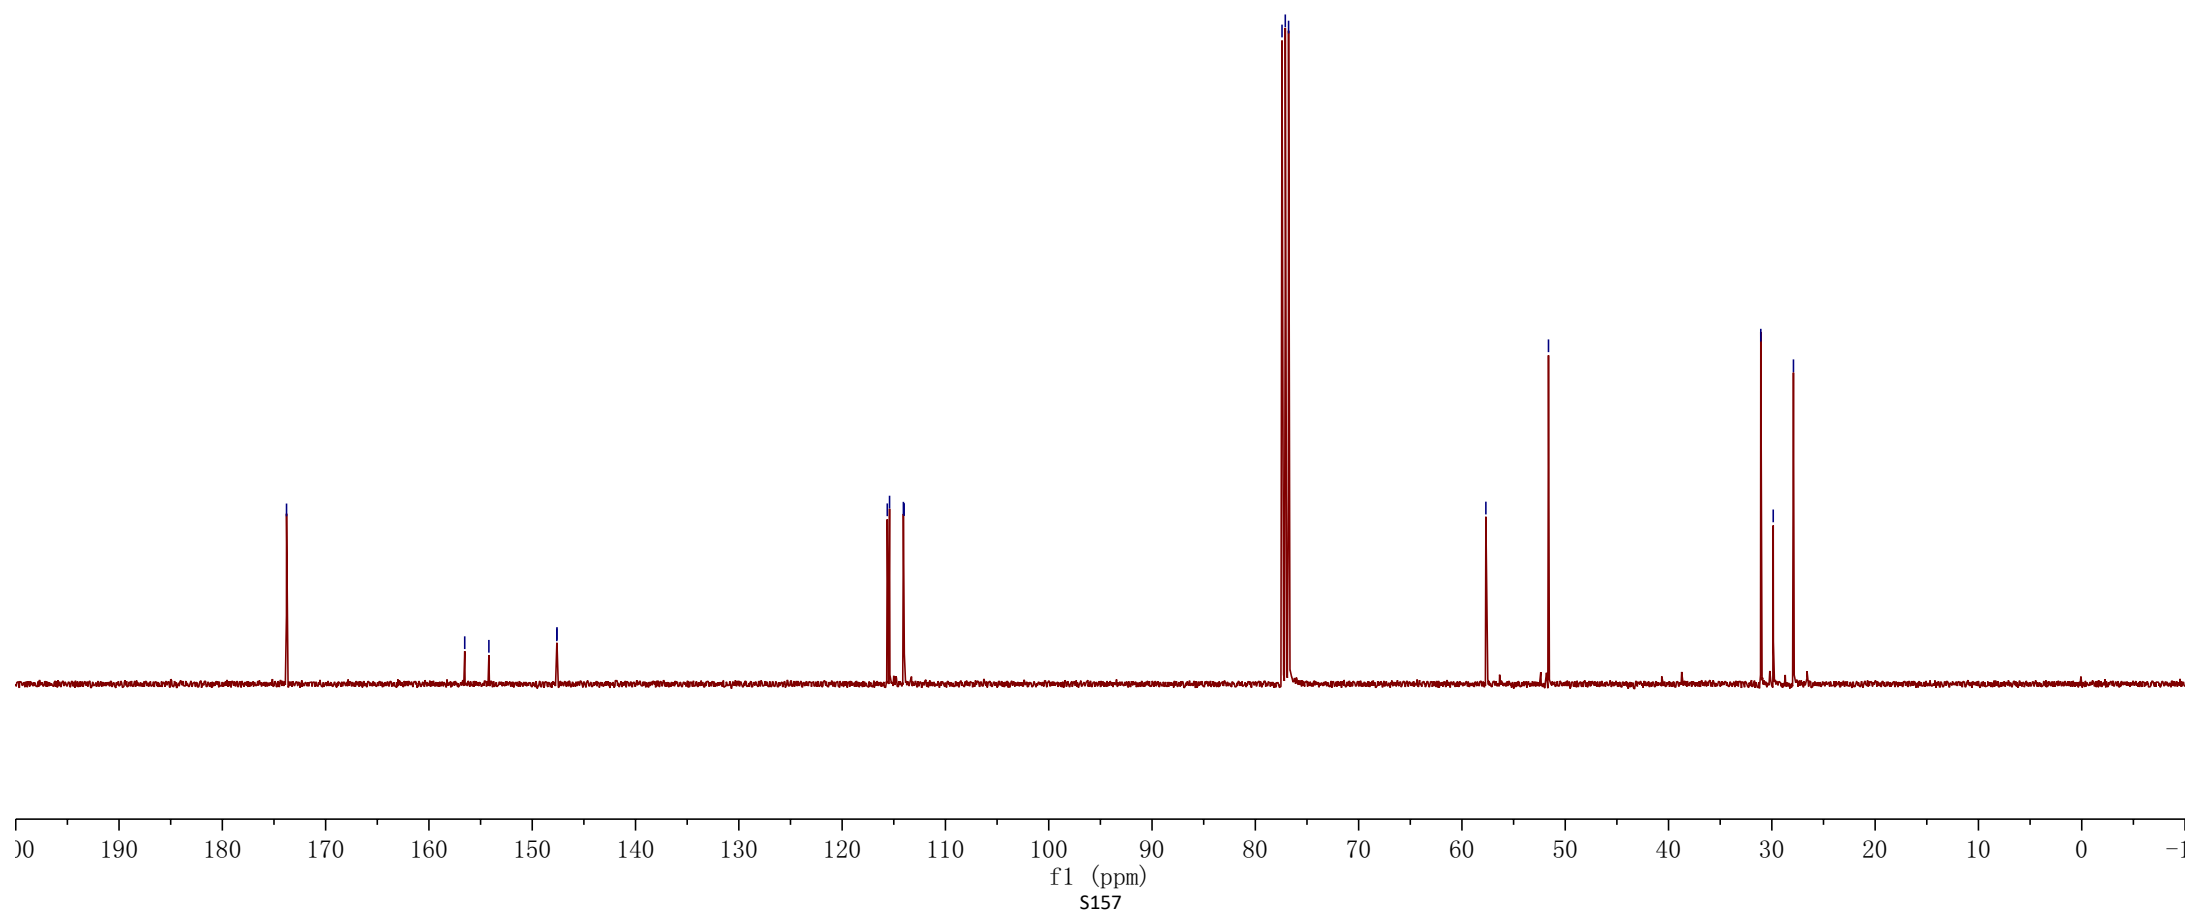

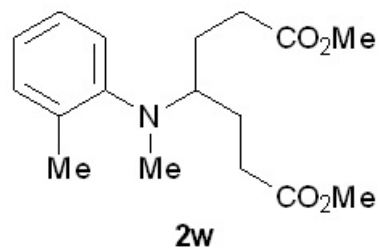

7.260  
7.148  
7.131  
7.112  
7.049  
7.030  
6.943  
6.927  
6.907

3.625  
3.033  
3.015  
2.627  
2.406  
2.398  
2.389  
2.383  
2.380  
2.376  
2.366  
2.359  
2.241  
1.909  
1.892  
1.870  
1.851  
1.833  
1.816  
1.799

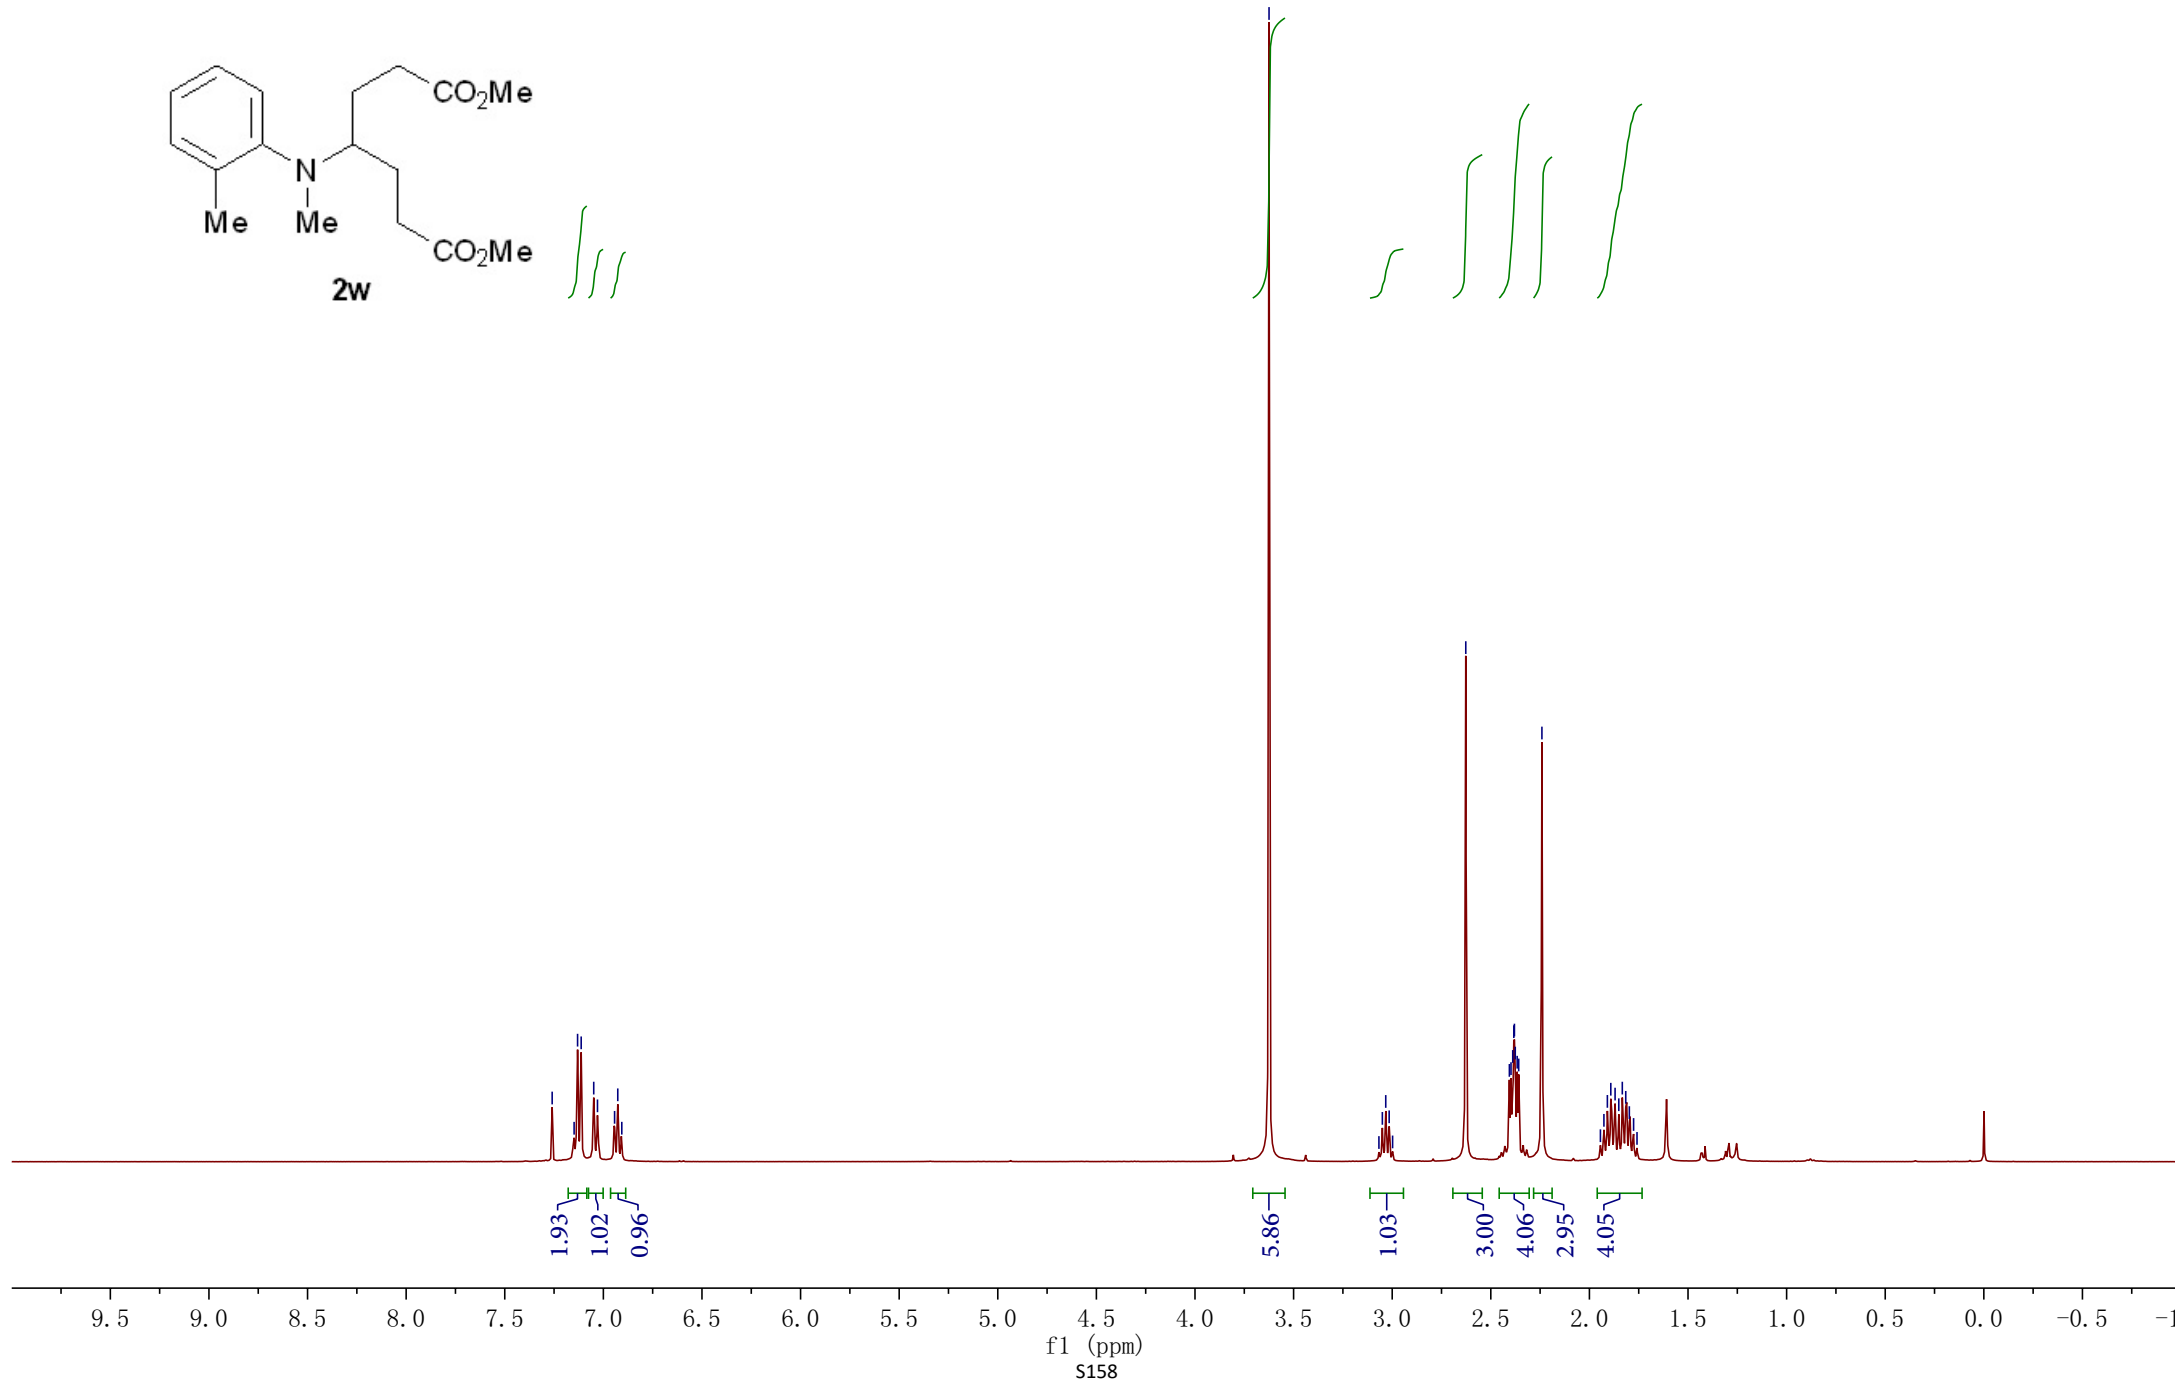

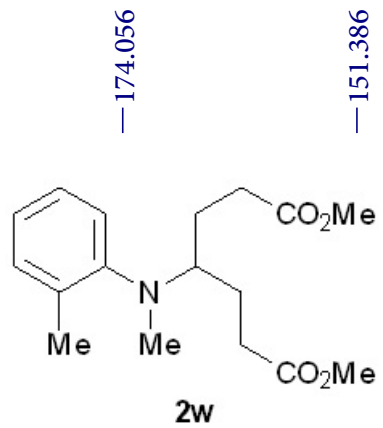

174.056

151.386

132.285

131.543

126.355

122.666

121.923

77.419

77.099

76.783

59.403

51.624

33.214

31.285

25.969

19.067

190 180 170 160 150 140 130 120 110 100 90 80 70 60 50 40 30 20 10 0 -1

f1 (ppm)

S159

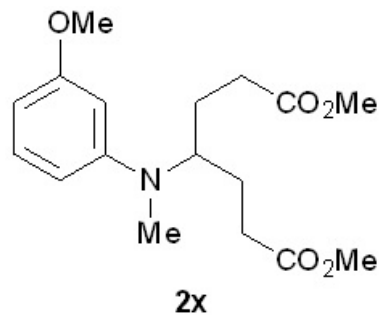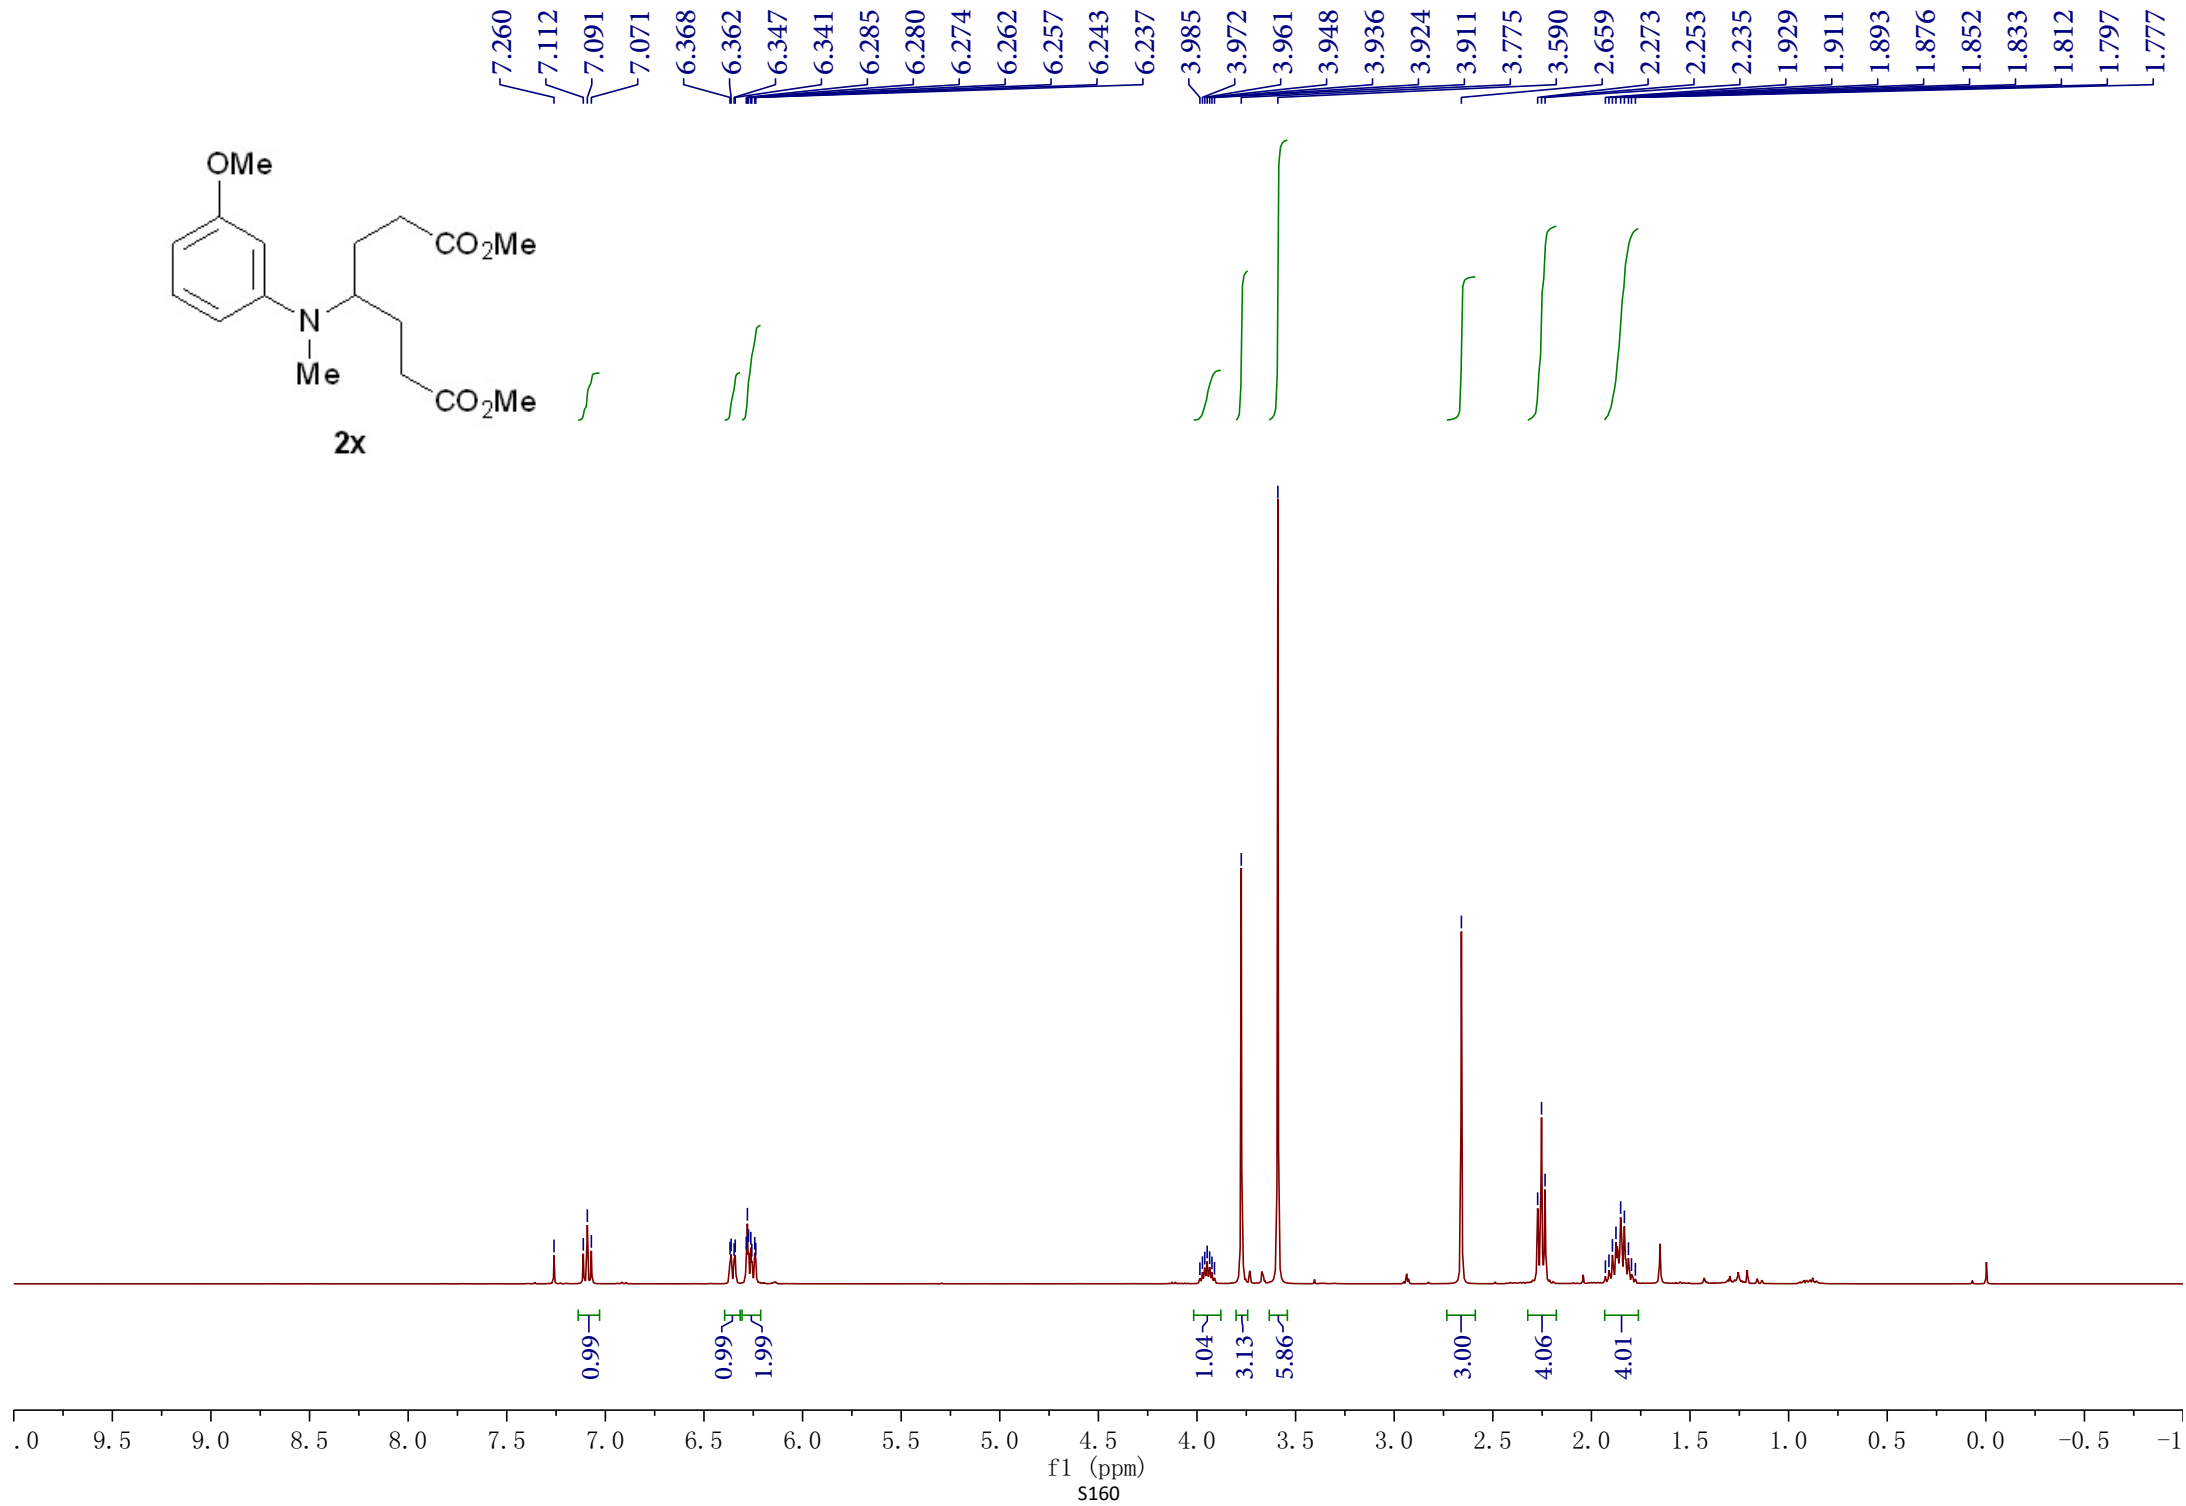



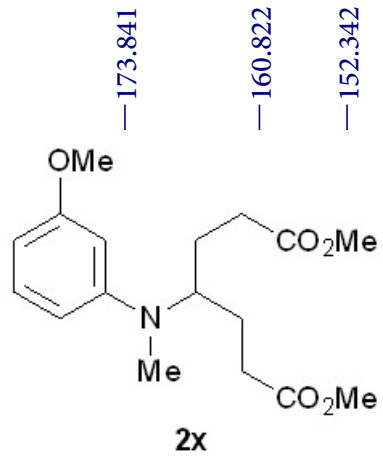

173.841

160.822

152.342

129.848

105.837

101.348

99.317

77.418

77.100

76.782

56.511

55.138

51.594

30.994

29.603

28.091

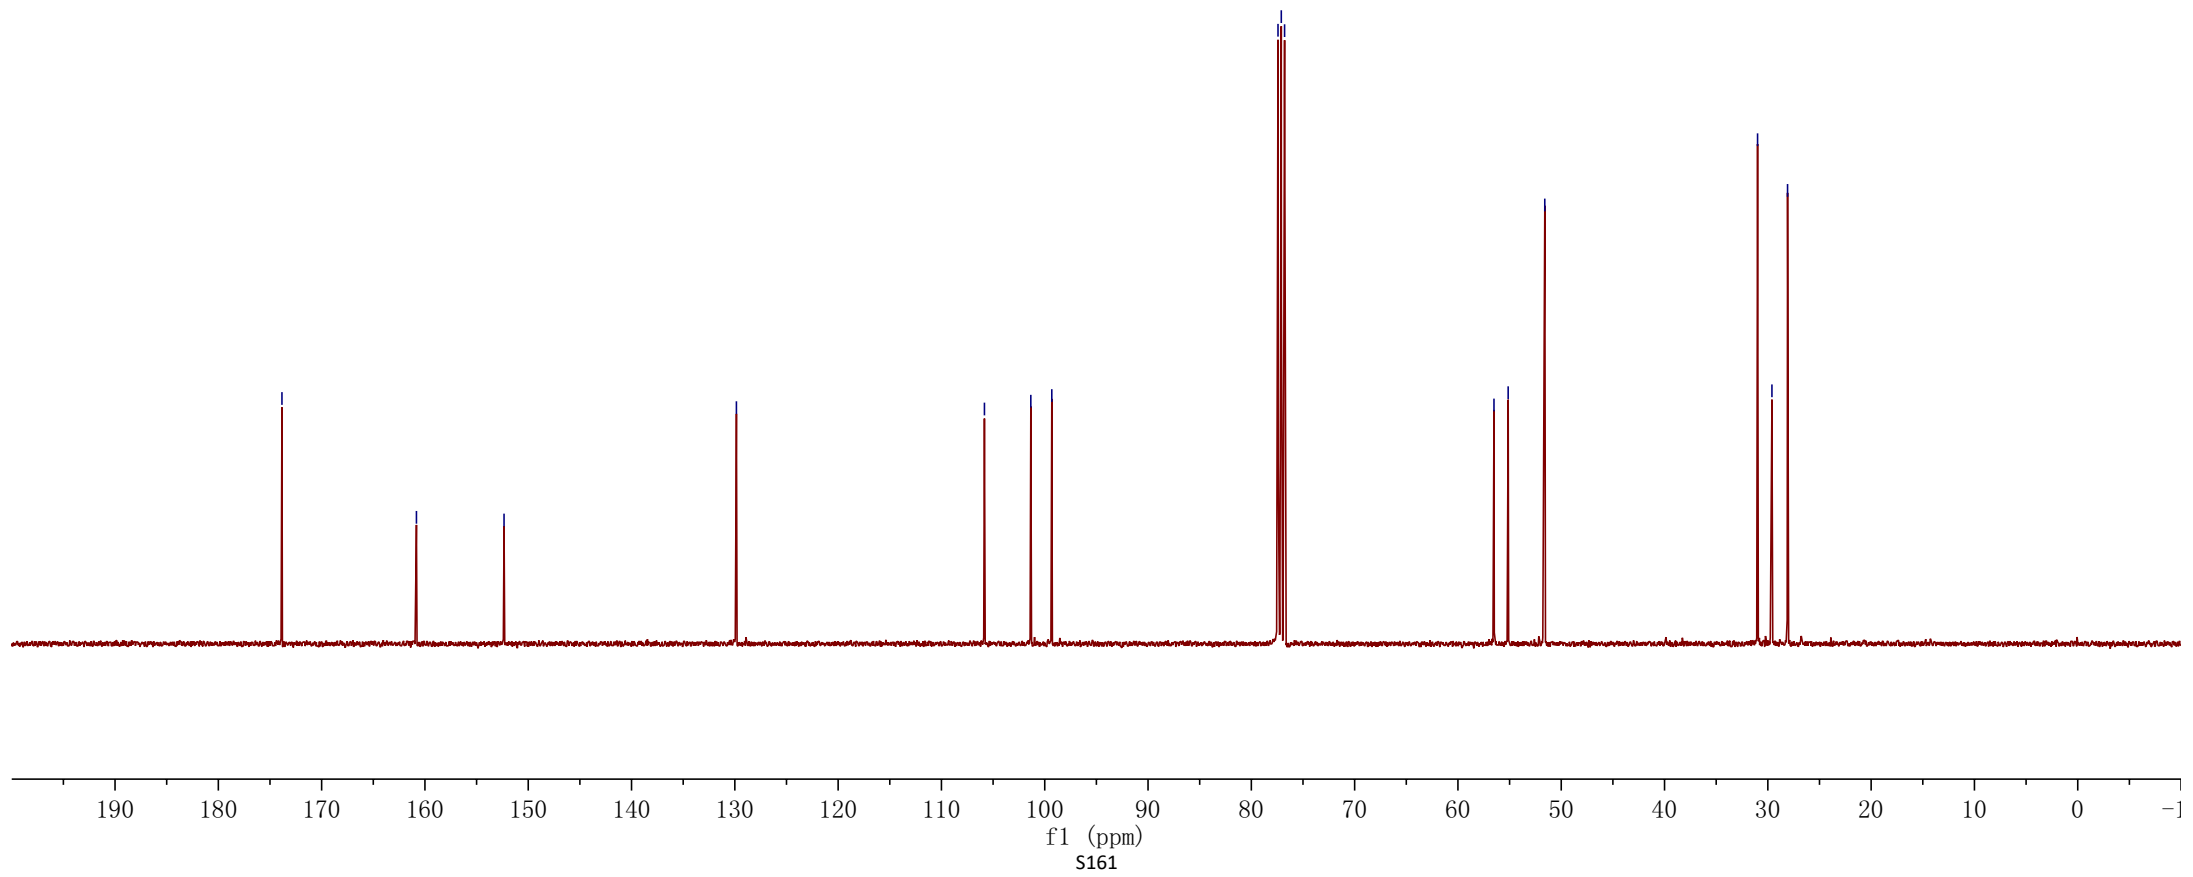

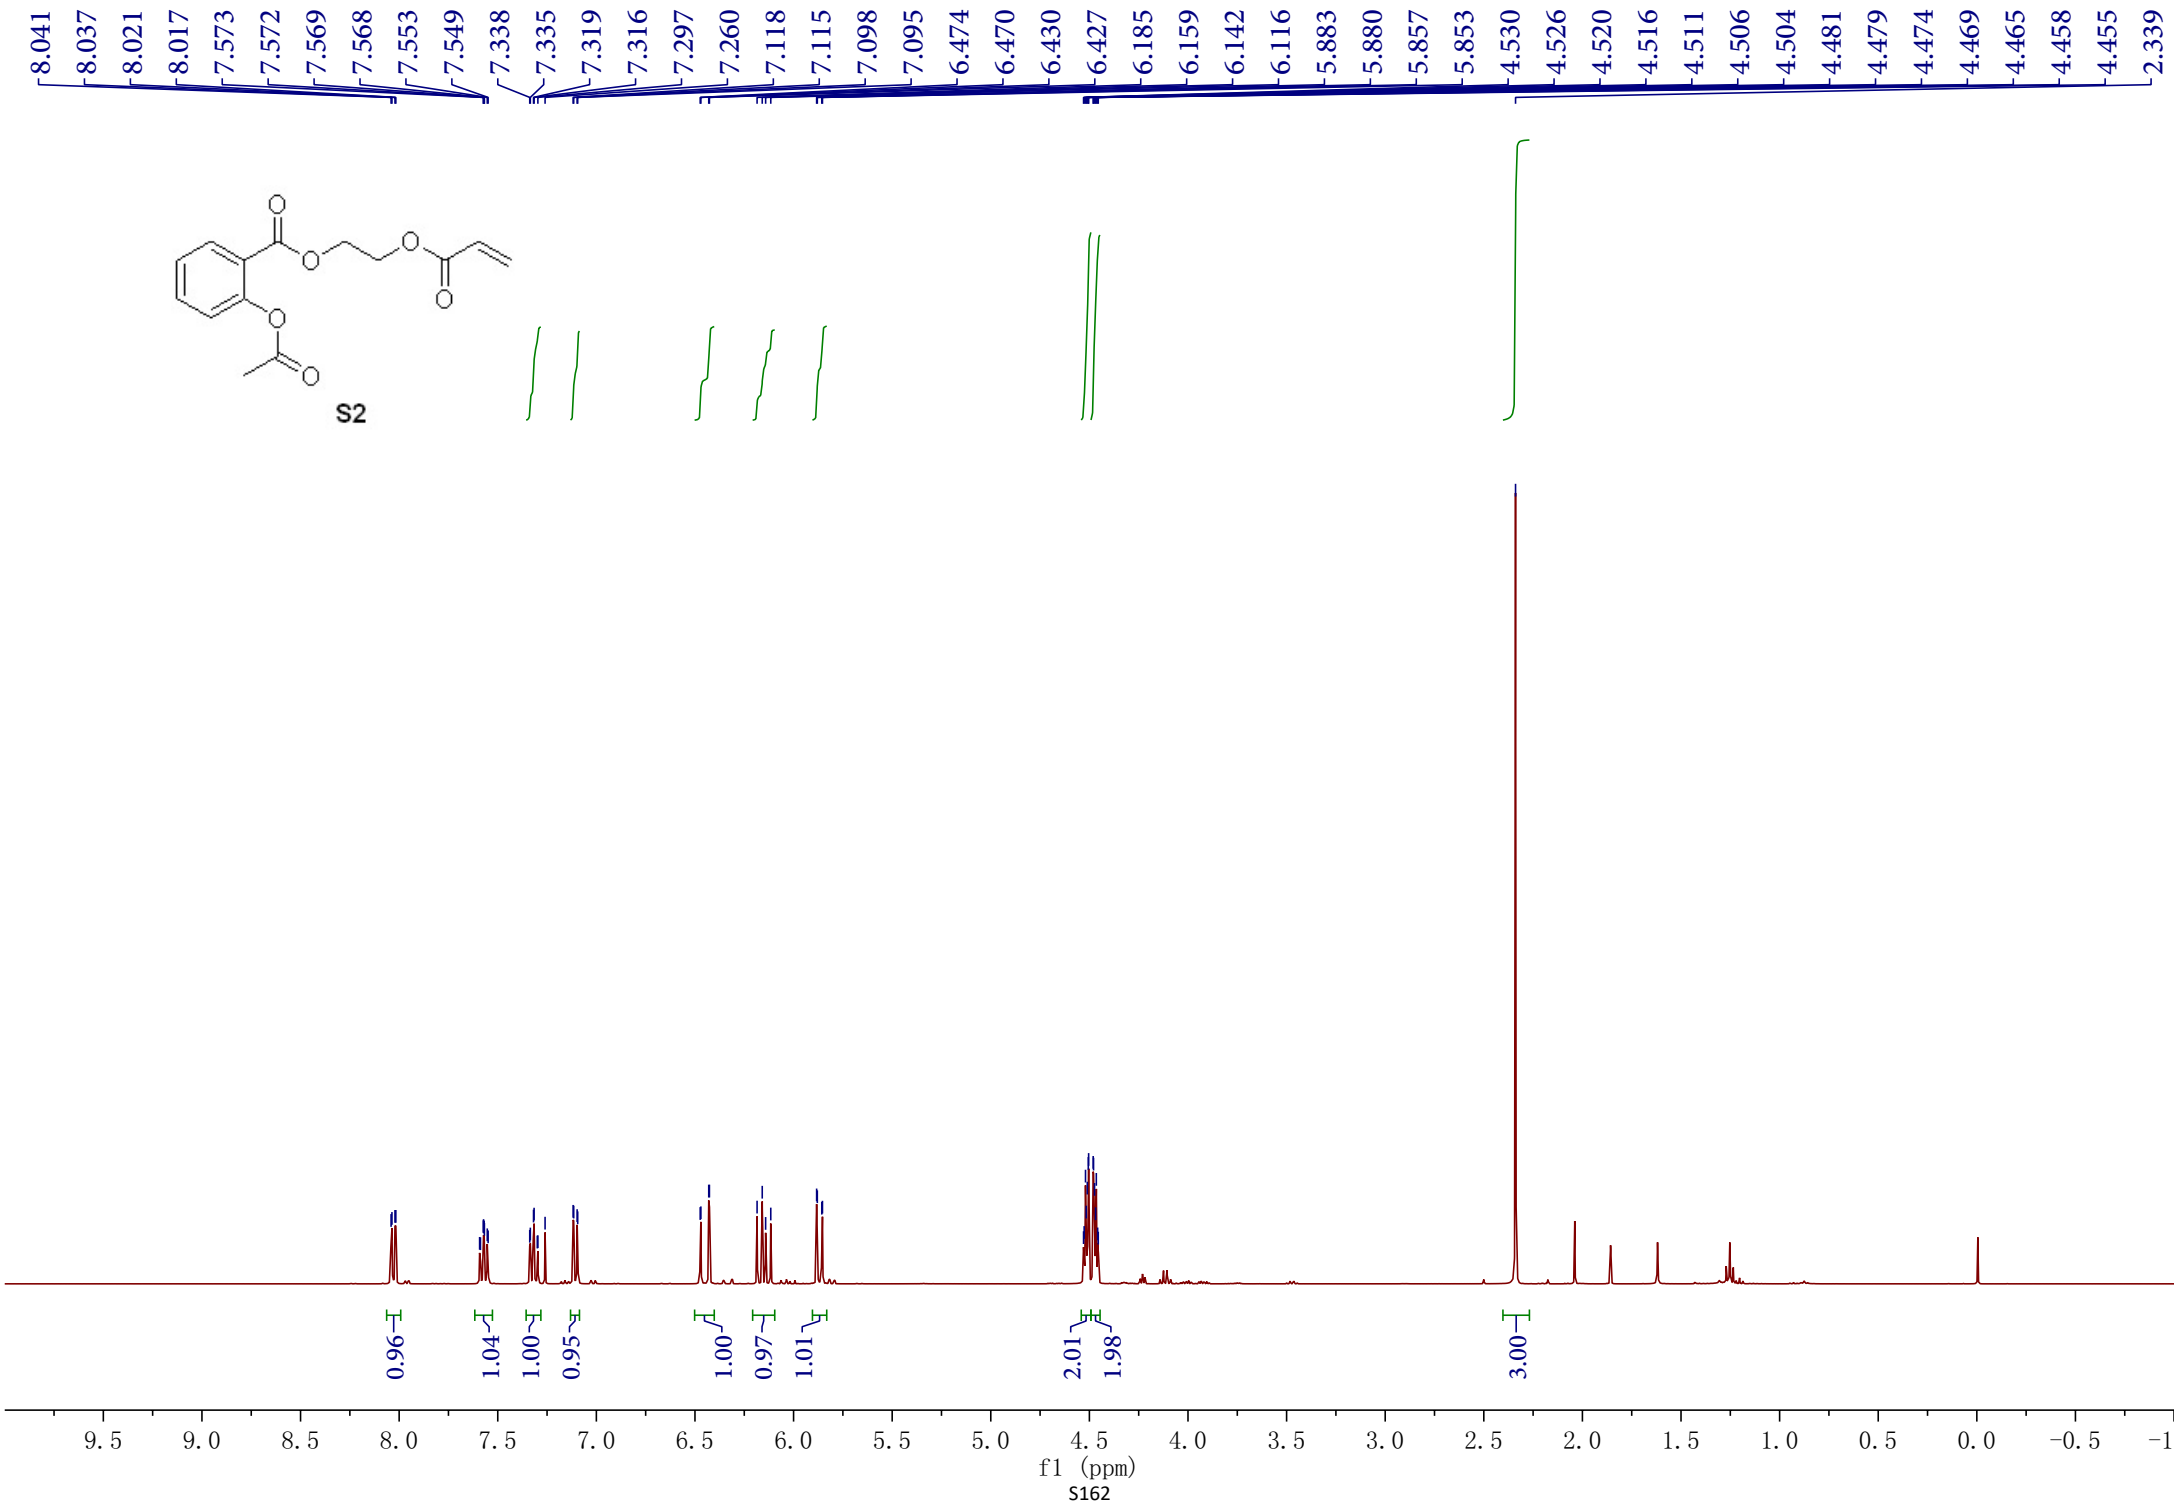

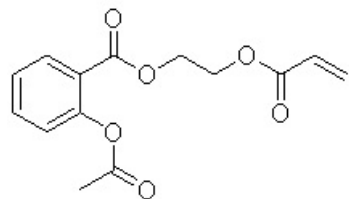

S2

169.681  
165.955  
164.185  
150.867

134.197  
131.954  
131.640  
127.971  
126.140  
123.940  
122.840

77.417  
77.100  
76.782  
62.846  
62.241

21.054

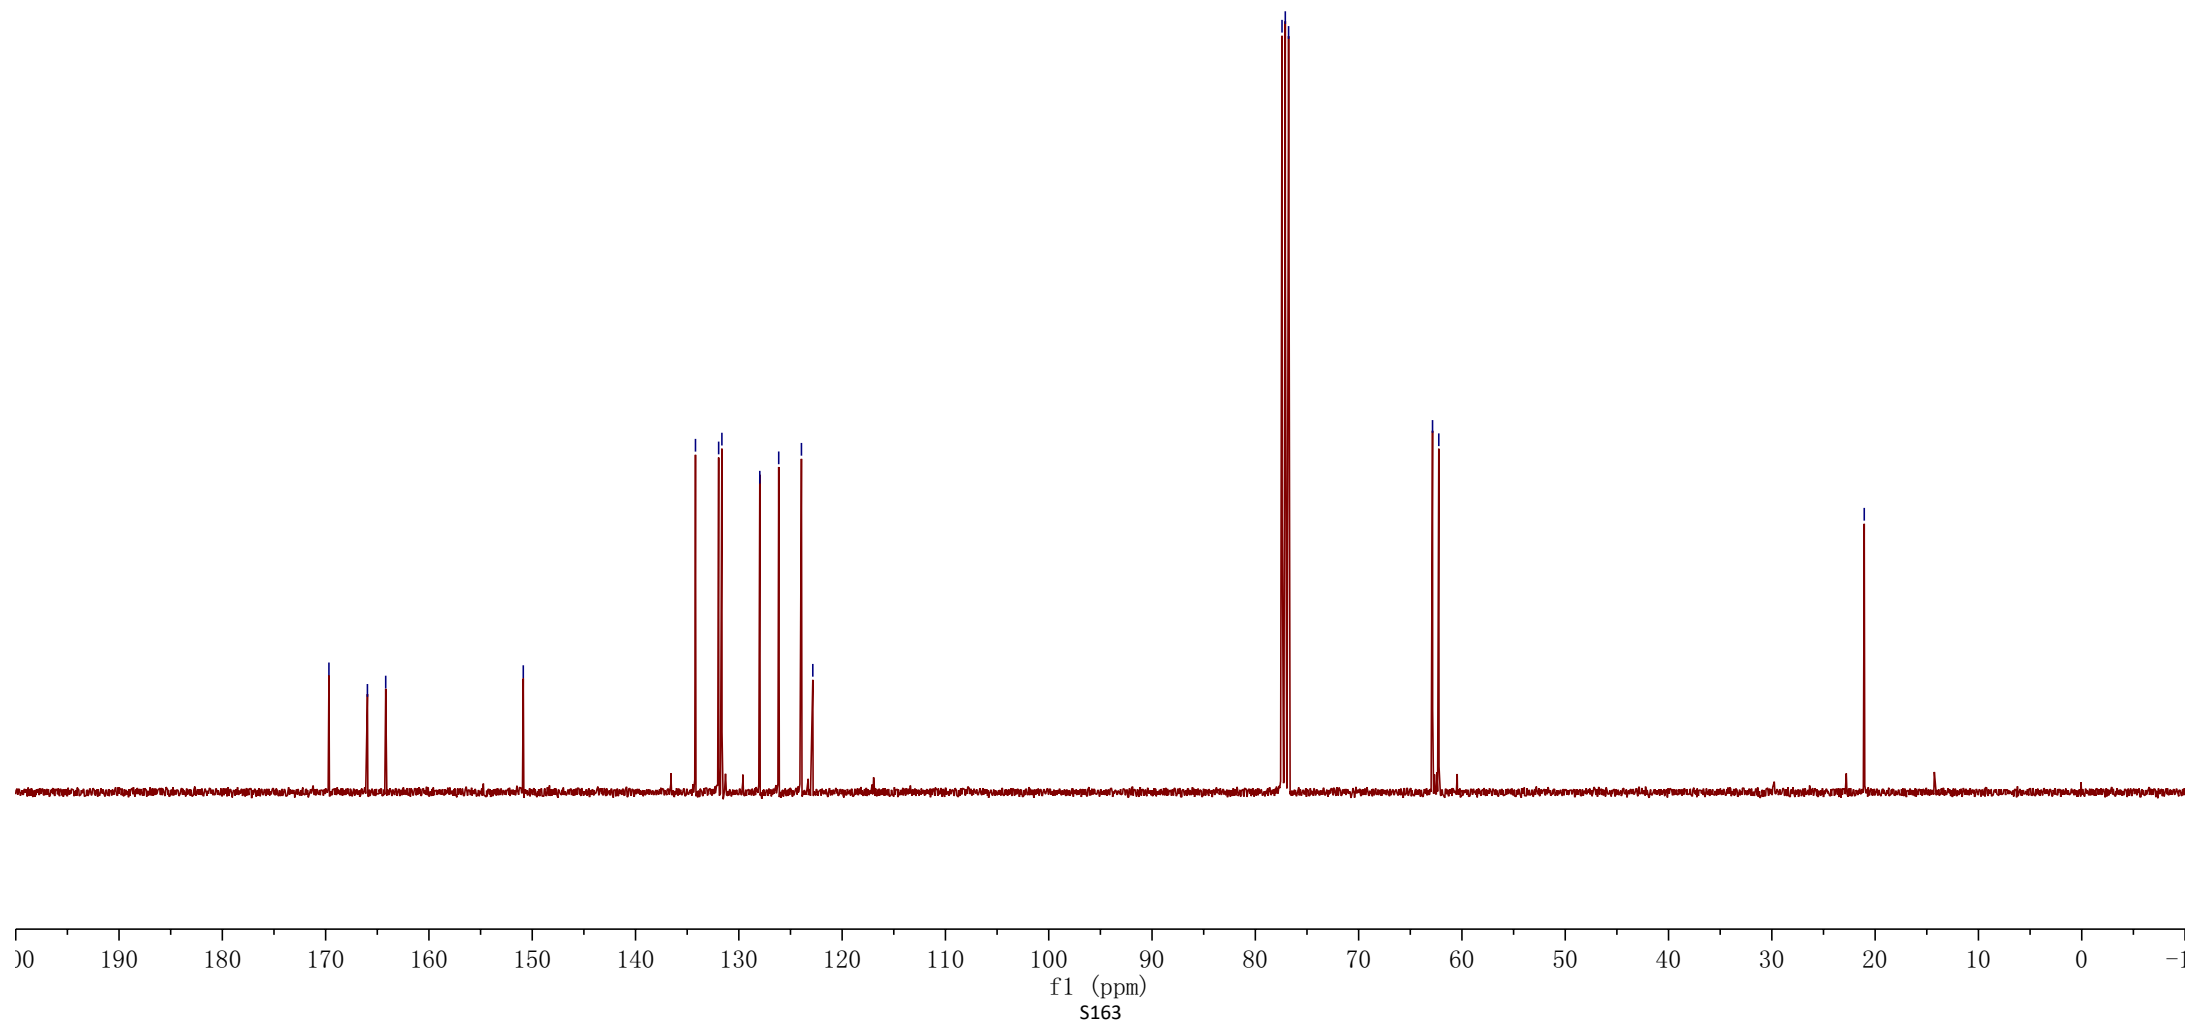

7.994 7.990 7.975 7.970 7.562 7.559 7.543 7.539 7.319 7.316 7.300 7.297 7.281 7.278 7.260 7.181 7.162 7.159 7.141 7.106 7.104 7.086 7.084 6.730 6.710 6.645 4.375 4.369 4.364 4.356 4.351 4.347 4.278 4.269 4.264 4.257 4.253 2.643 2.327 2.320 2.302 2.276 2.263 2.257 1.860 1.841 1.805

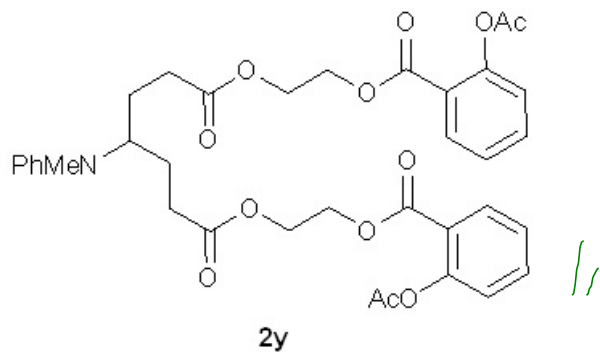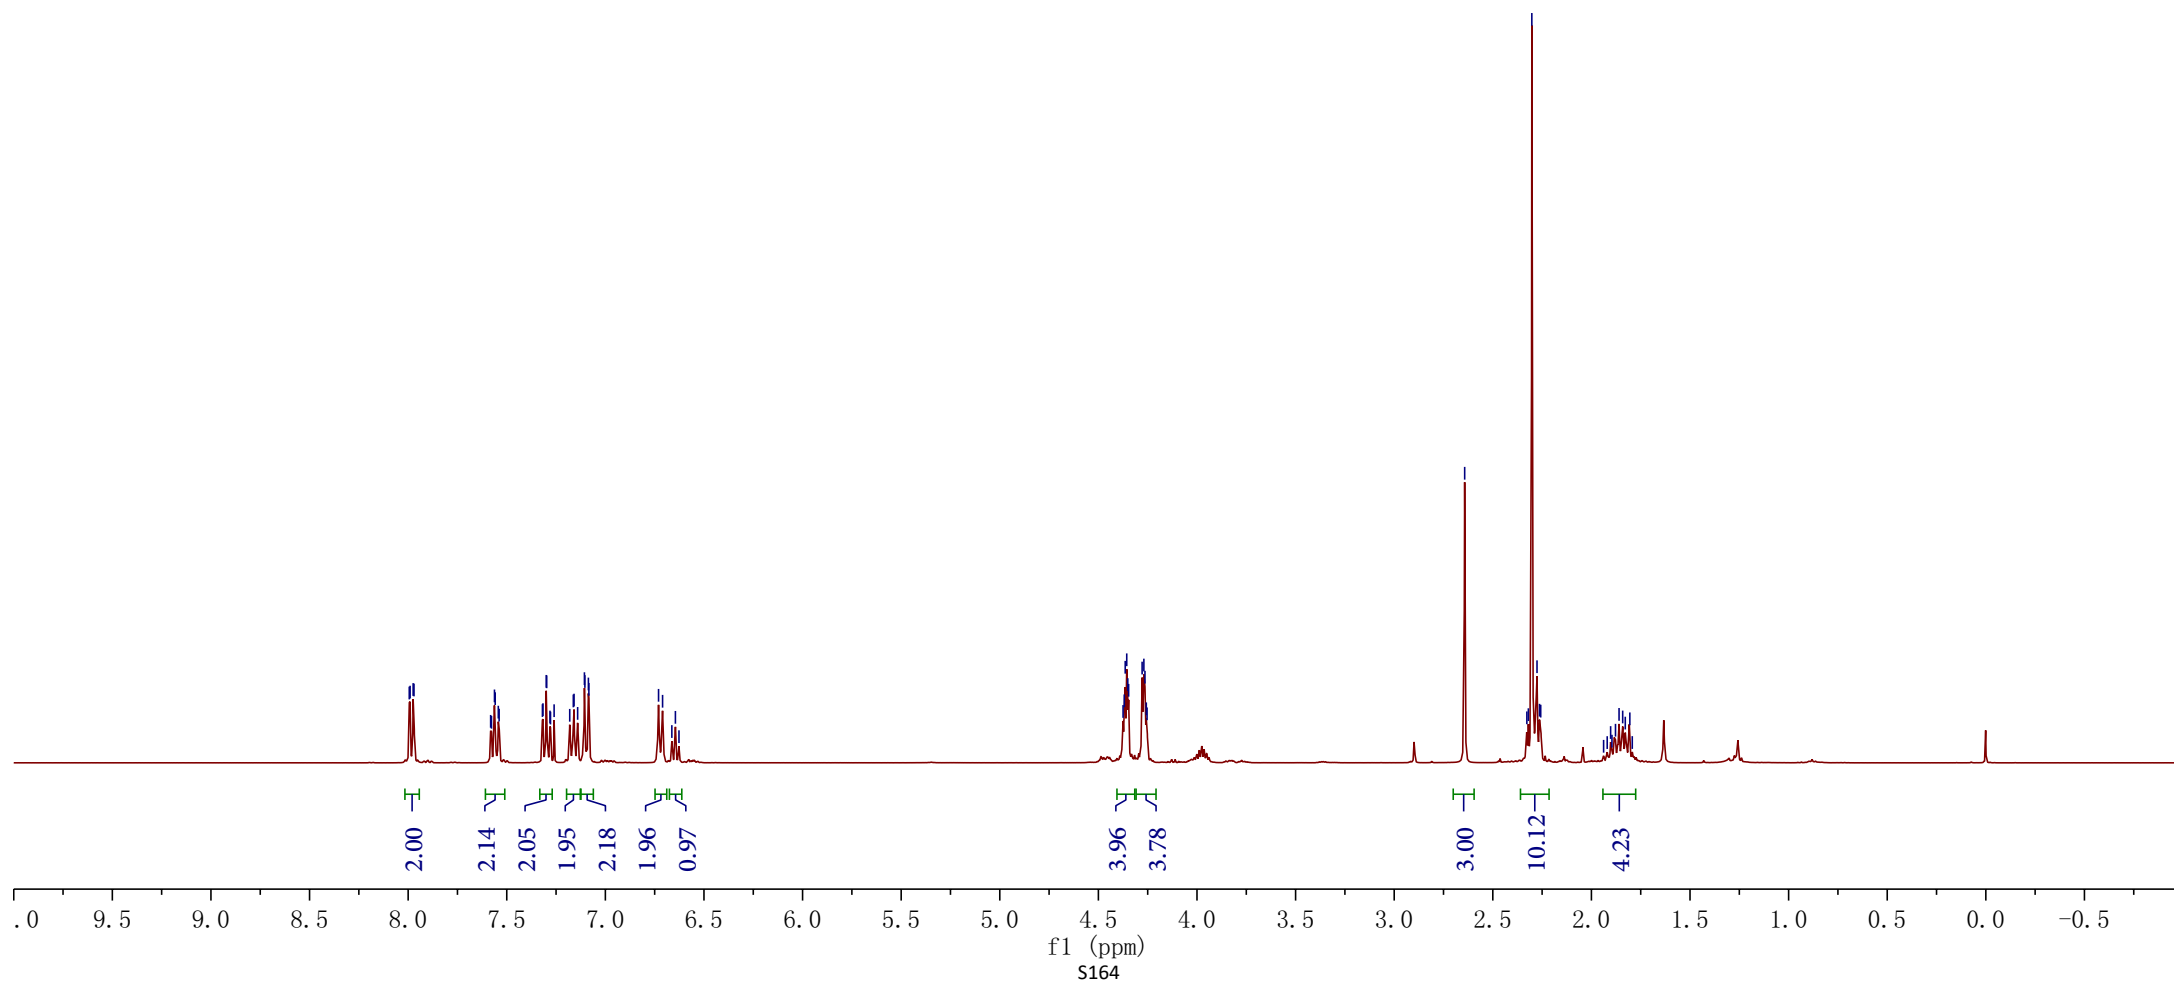

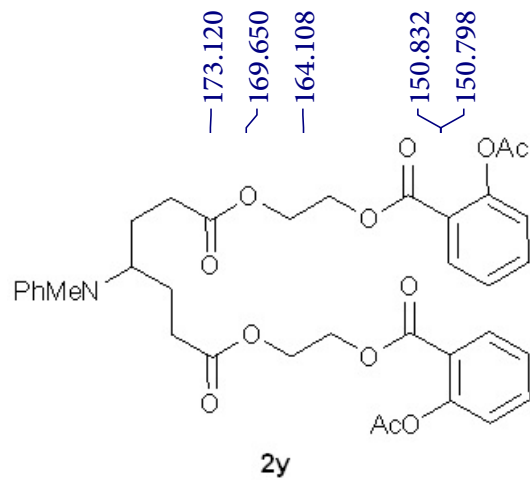

173.120

169.650

164.108

150.832

150.798

134.158

131.916

129.250

126.105

123.903

122.822

116.756

112.681

77.419

77.101

76.783

62.781

62.066

56.431

31.051

29.437

27.982

21.016

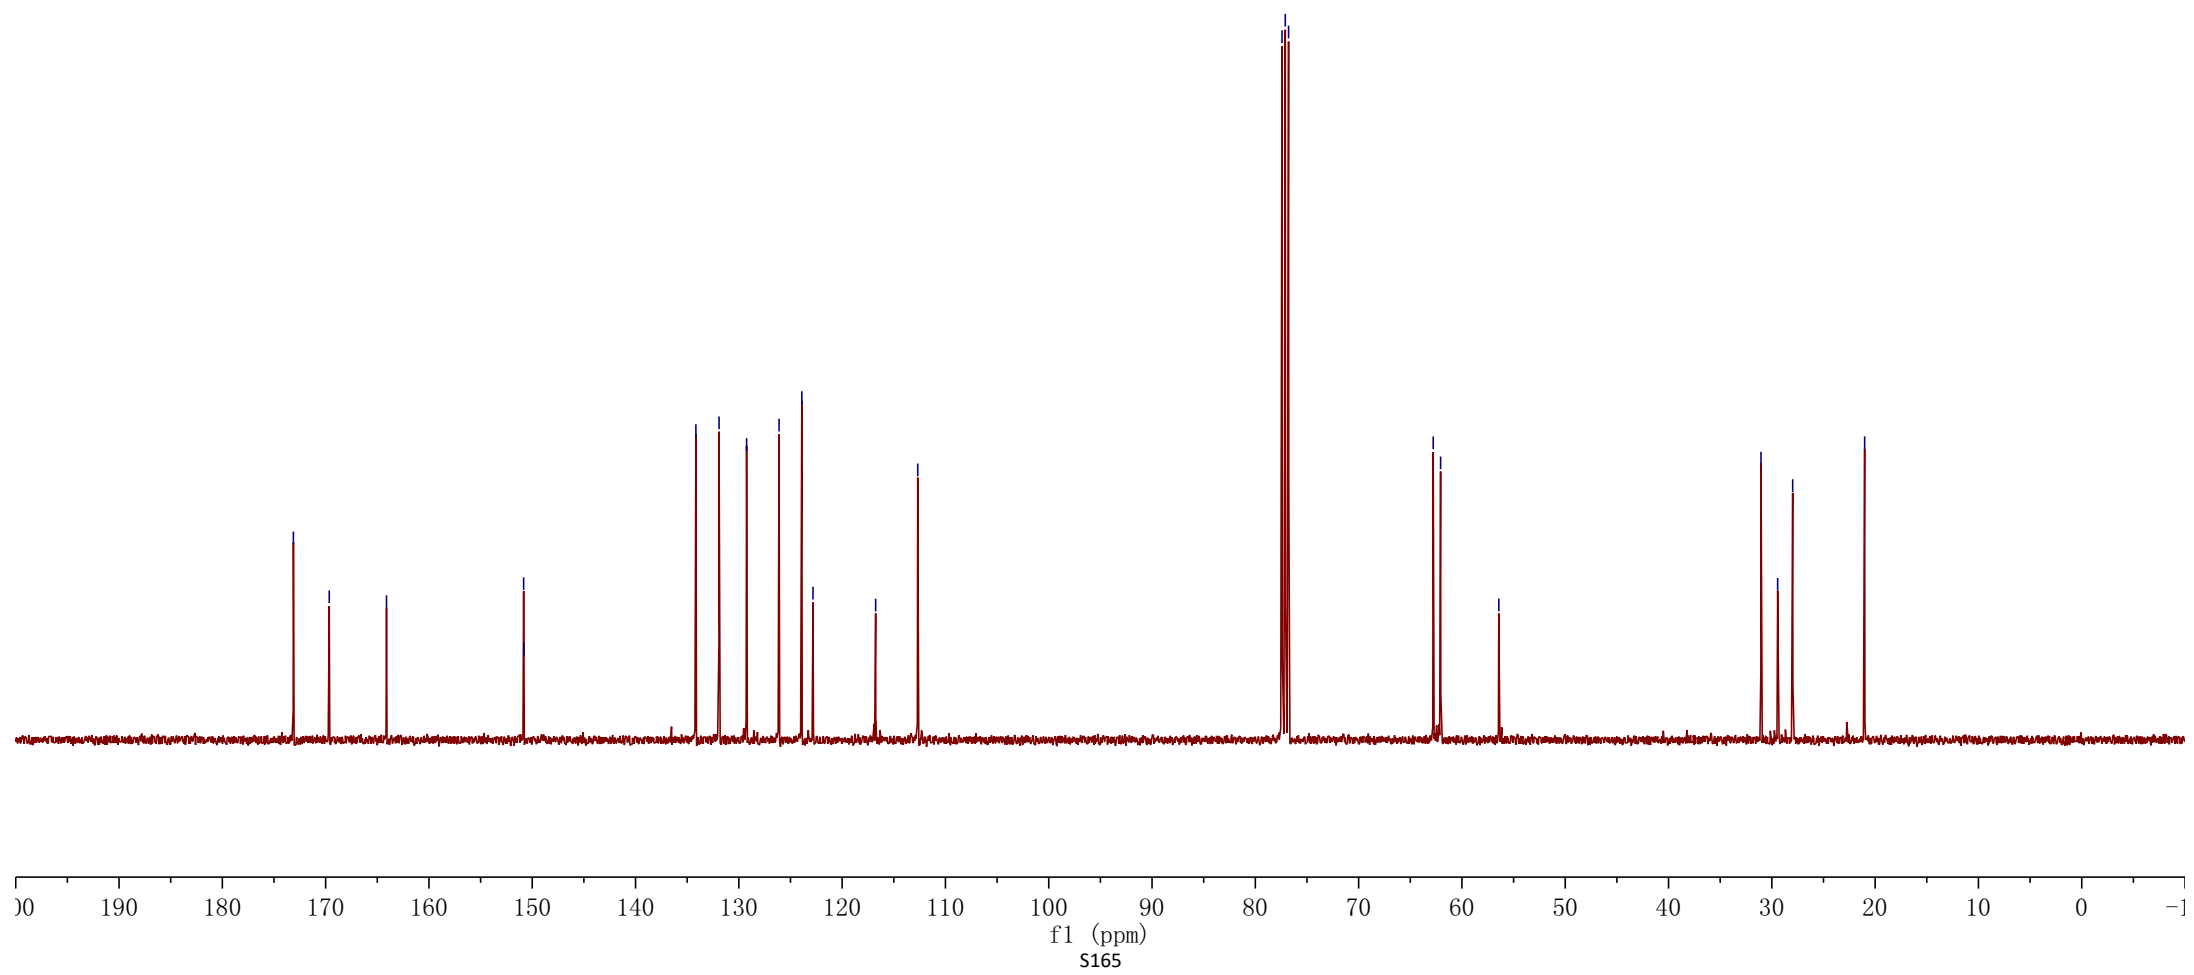

7.260 6.444 6.441 6.401 6.398 6.161 6.135 6.117 6.091 5.869 5.865 5.843 5.839 4.358 4.355 4.348 4.344 4.335 4.314 4.308 4.303 4.297 2.881 2.831 2.800 2.318 2.277 2.236 2.191 2.180 2.144 2.112 2.100 2.029 2.001 1.976 1.840 1.822 1.386 1.386 1.304 1.279 1.263 1.238 1.052 0.840 0.824

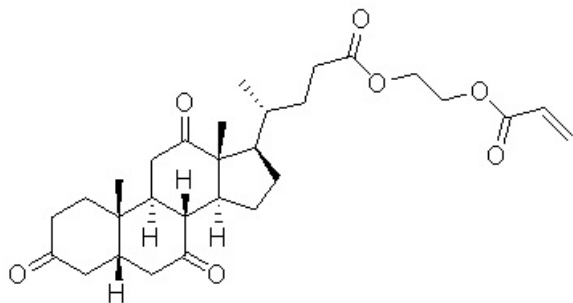

S3

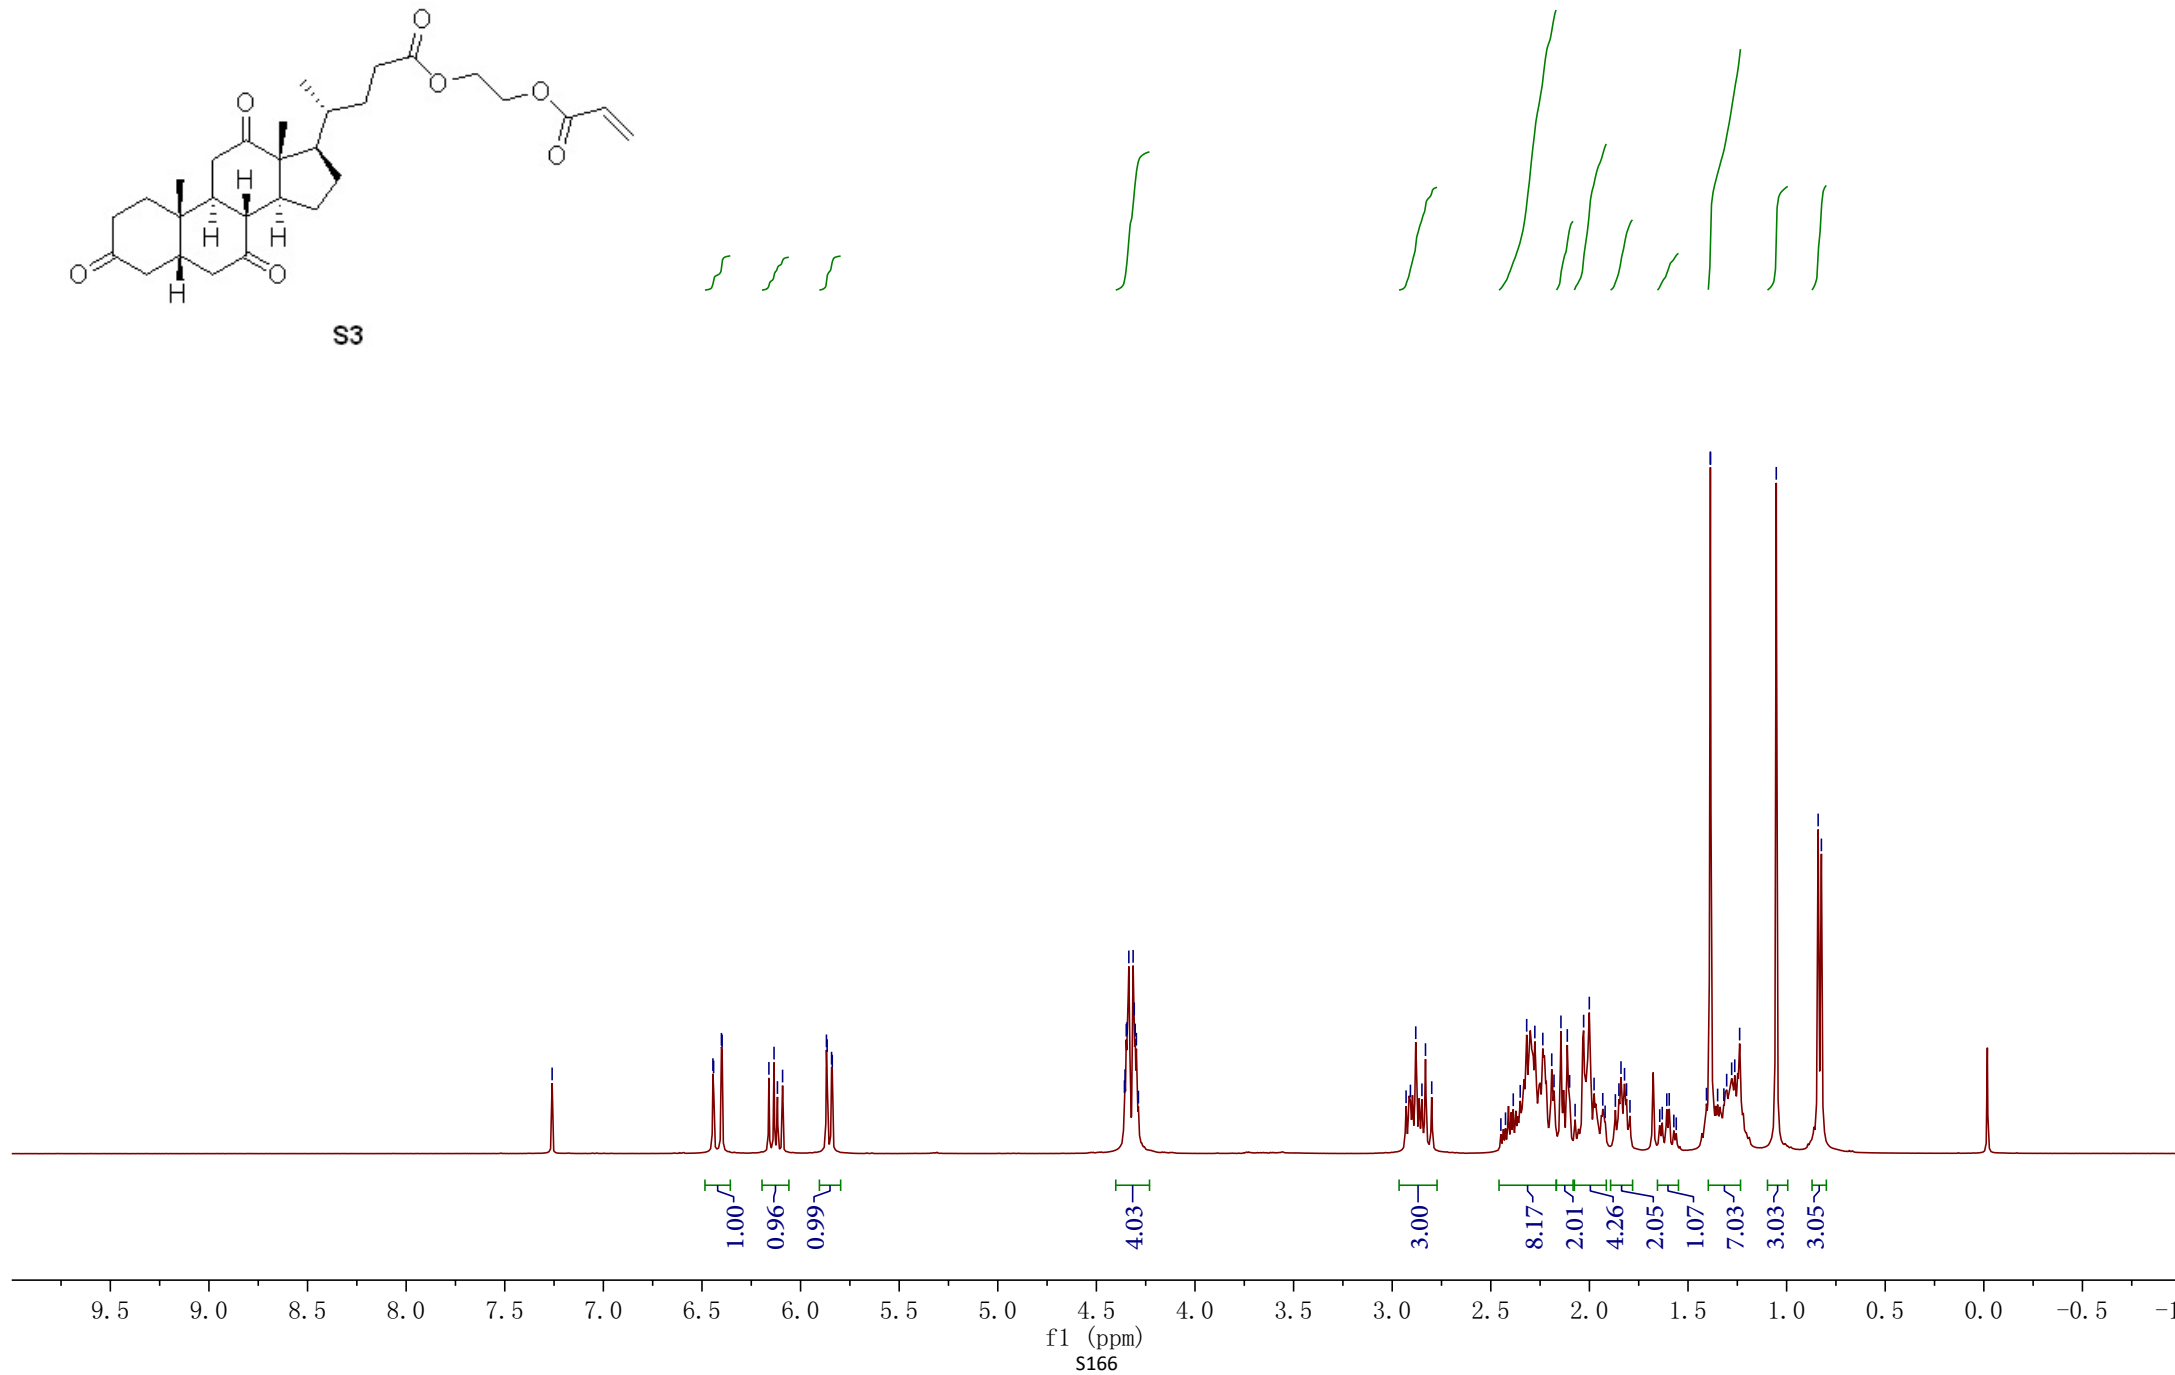

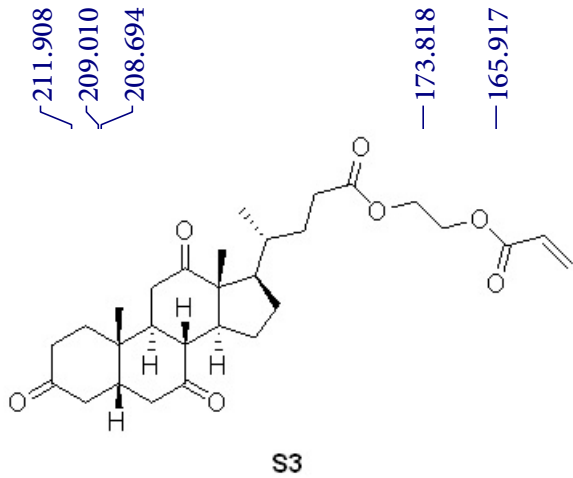

211.908  
209.010  
208.694

173.818  
165.917

131.395  
128.054

77.418  
77.099  
76.783  
62.374  
61.991  
56.950  
51.821  
49.051  
46.896  
45.713  
45.615  
45.040  
42.849  
38.695  
36.539  
36.073  
35.547  
35.342  
31.381  
30.429  
27.681  
25.192  
21.967  
18.662  
11.901

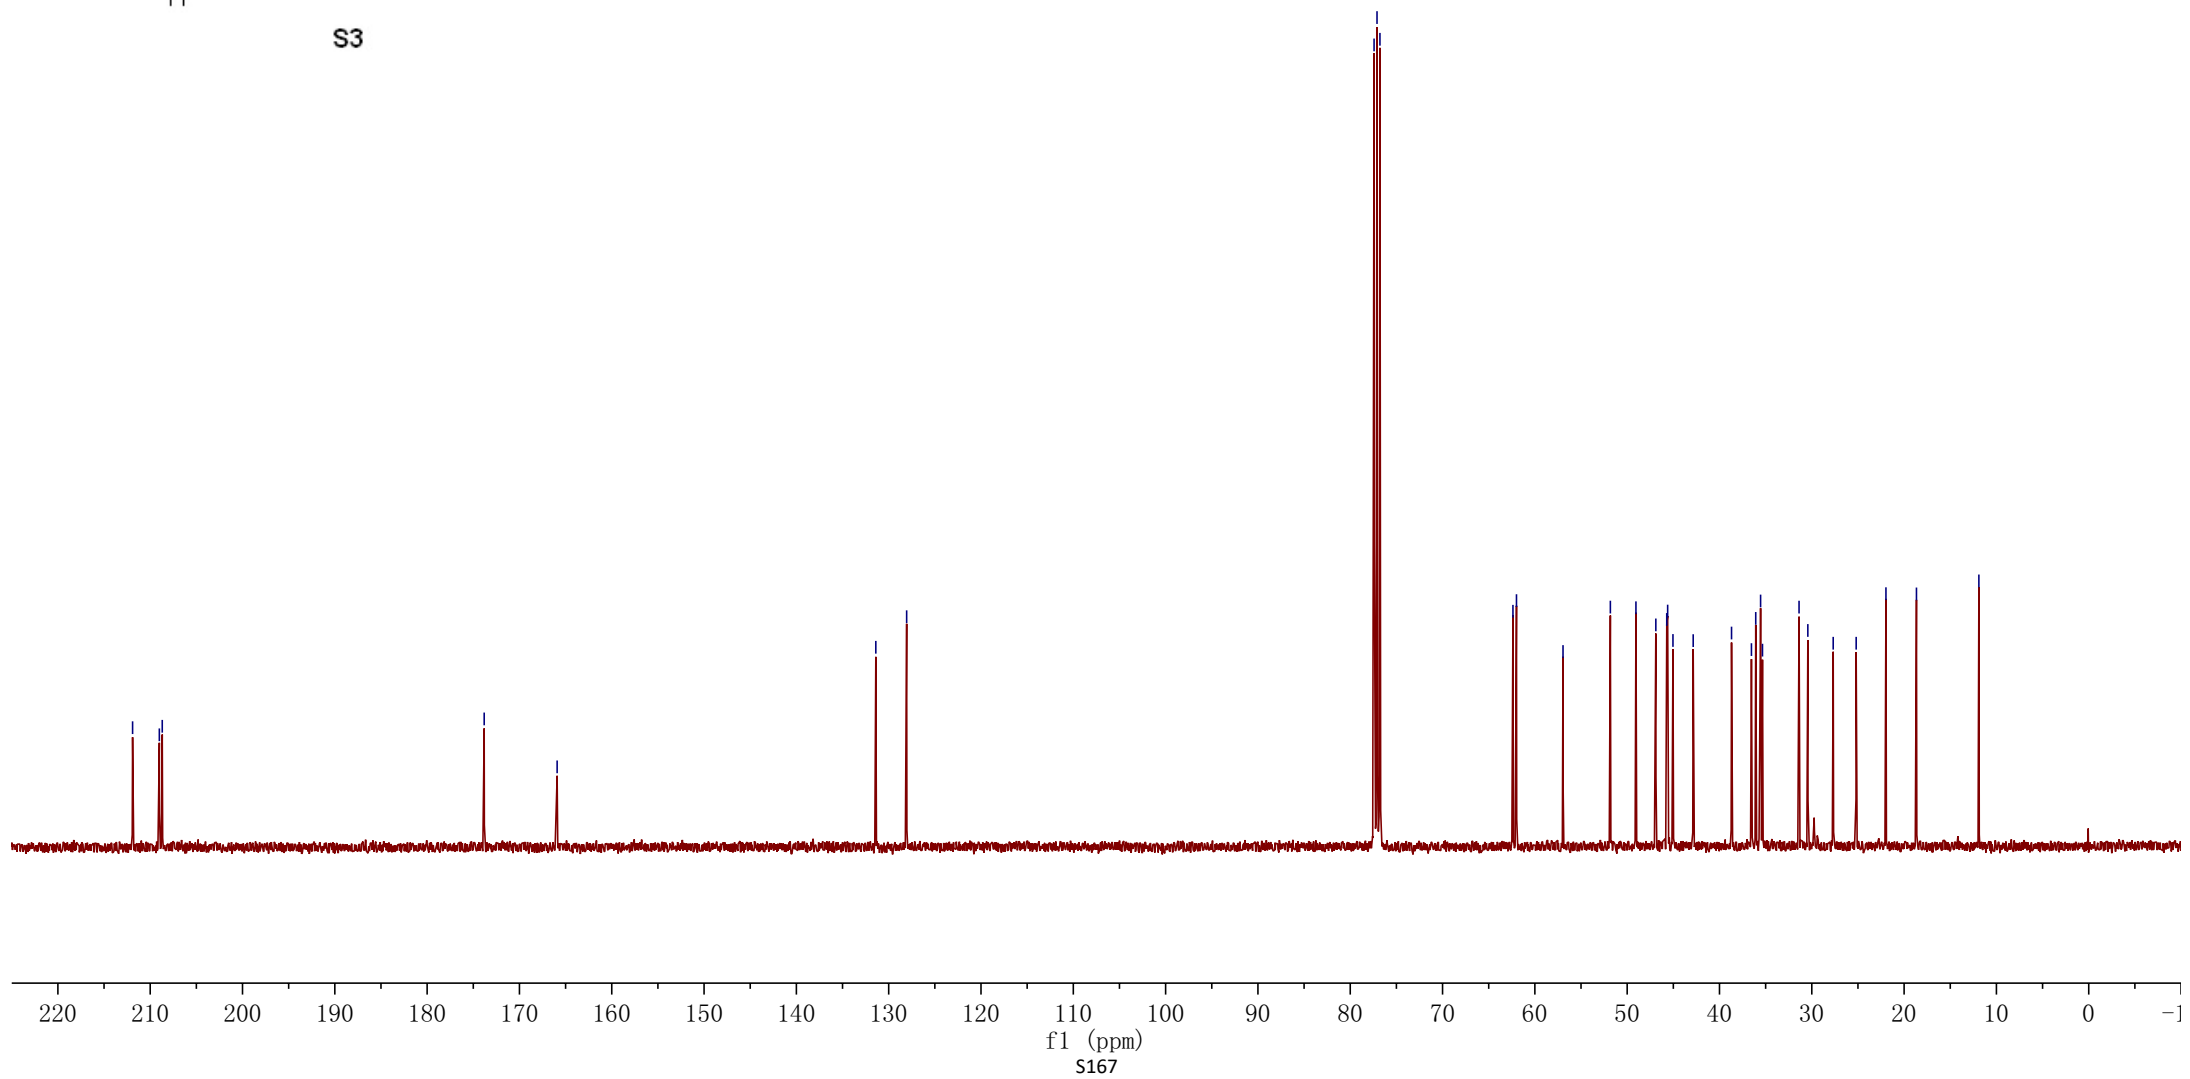

7.260 7.177 7.159 7.155 7.137 6.718 6.697 6.660 6.642 4.137 2.921 2.906 2.889 2.868 2.849 2.838 2.817 2.785 2.648 2.360 2.319 2.279 2.258 2.241 2.206 2.176 2.127 2.083 2.071 2.019 1.986 1.954 1.928 1.892 1.851 1.803 1.777 1.632 1.621 1.596 1.585 1.261 1.230 1.205 1.033 0.816 0.799

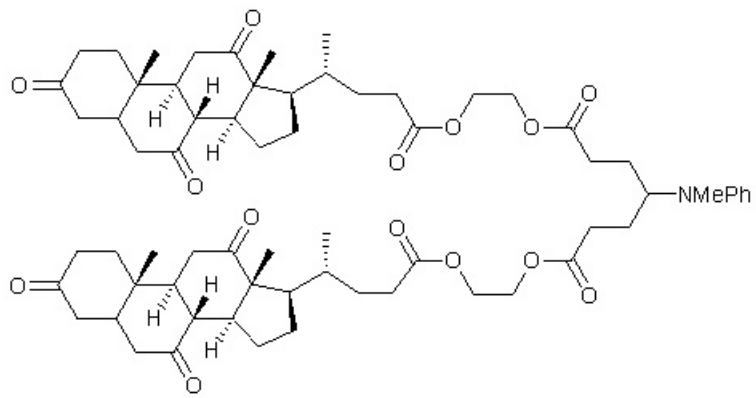

**2z**

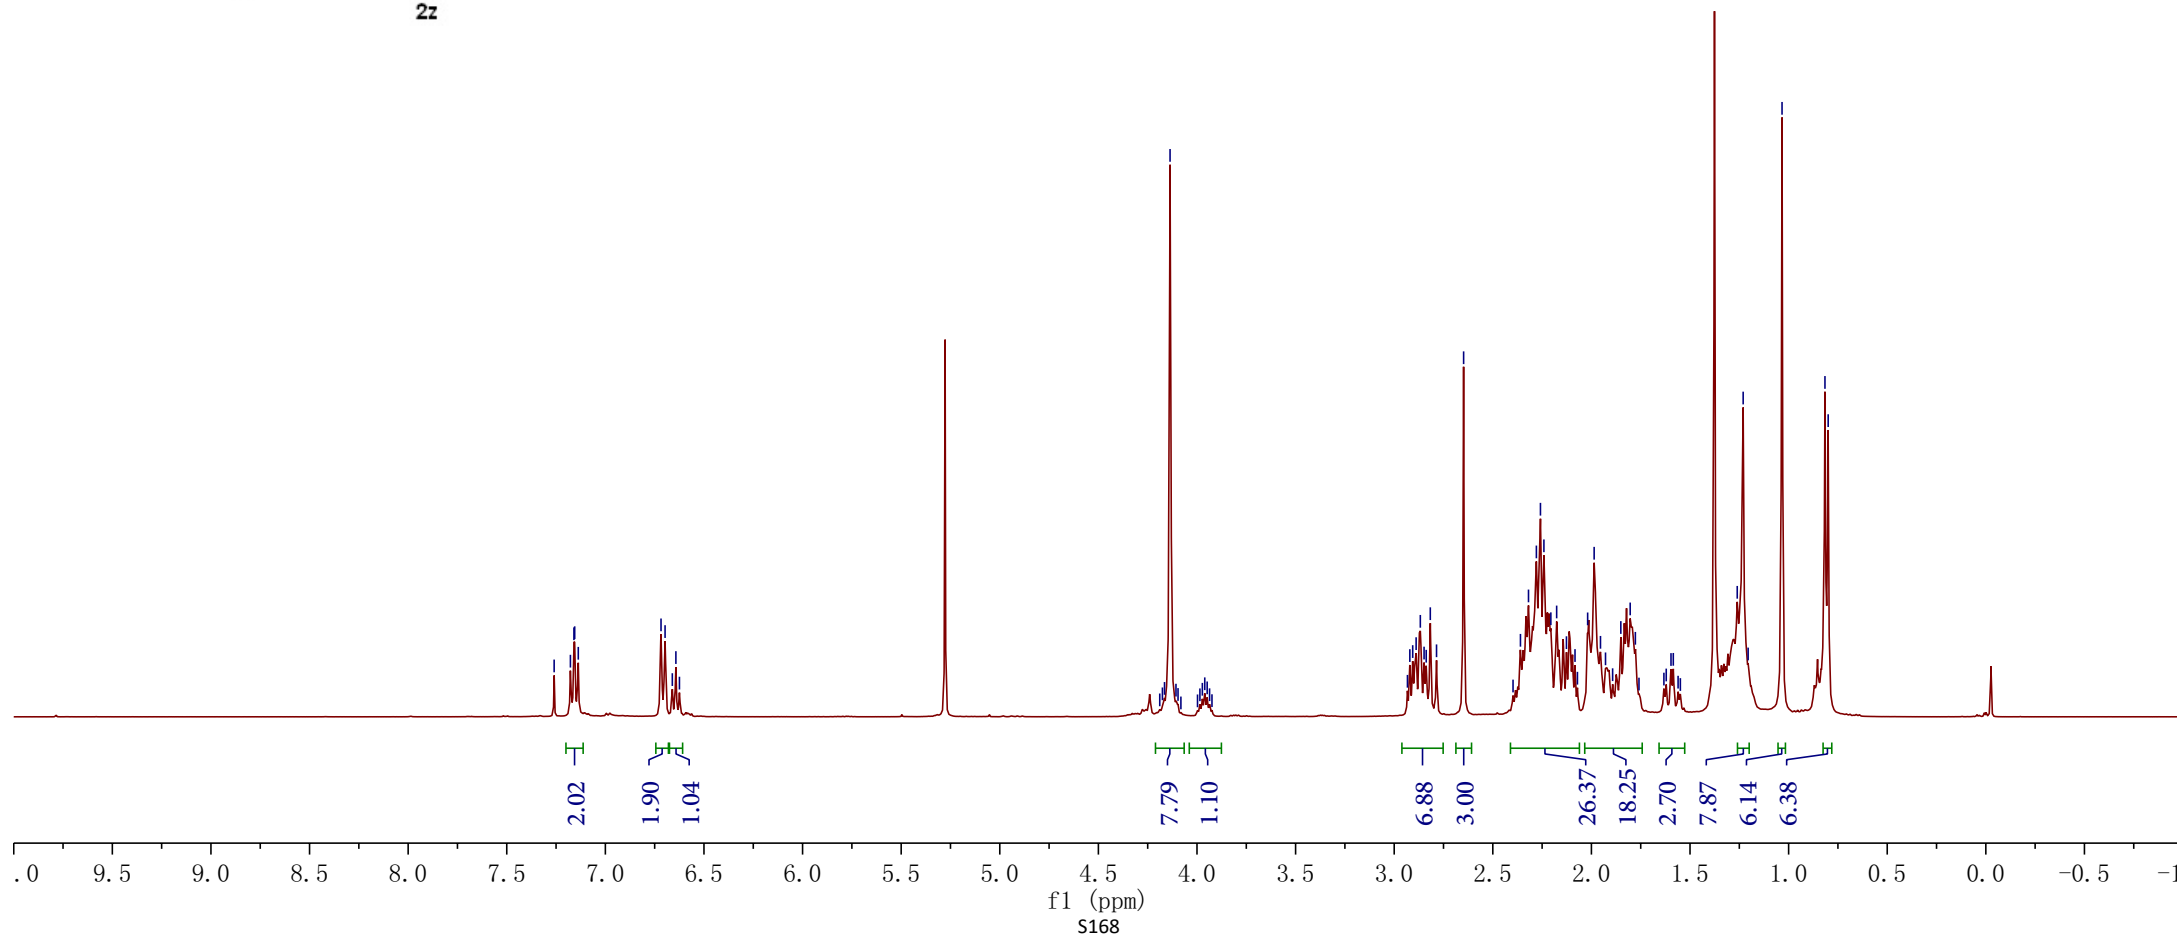



211.910  
209.084  
208.710

173.744  
173.051

150.765  
129.189  
116.653  
112.616  
77.418  
77.100  
76.782  
62.207  
61.923  
56.862  
56.365  
51.748  
48.962  
46.819  
45.605  
45.494  
44.978  
42.785  
38.635  
36.482  
36.004  
35.464  
35.258  
31.241  
30.985  
30.298  
29.689  
29.402  
27.938  
27.628  
25.122  
21.899  
18.619  
11.830

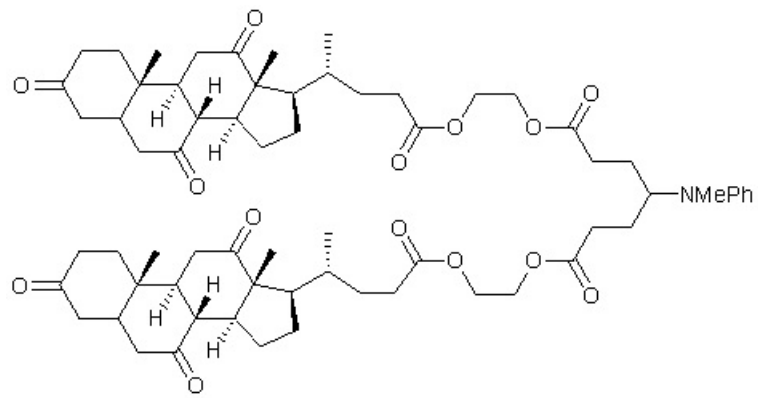

**2z**

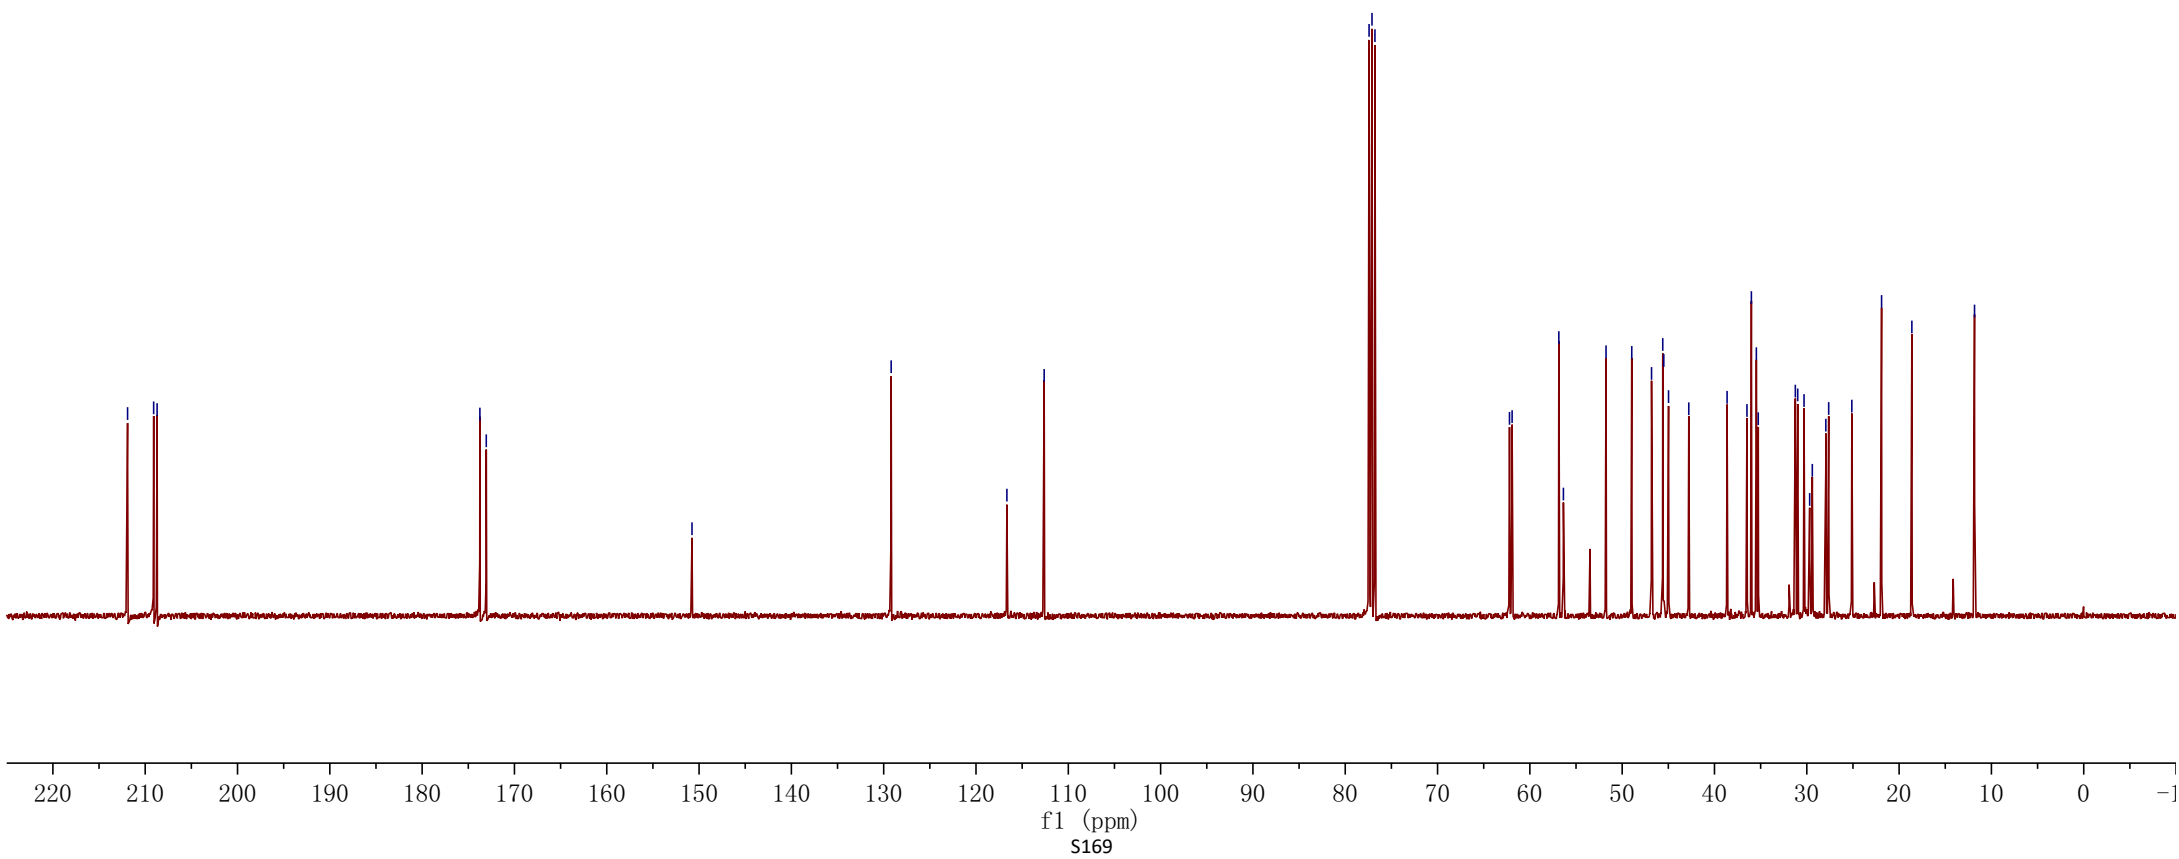

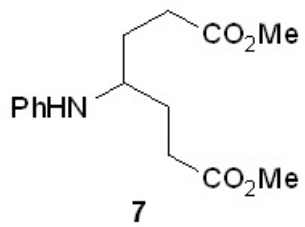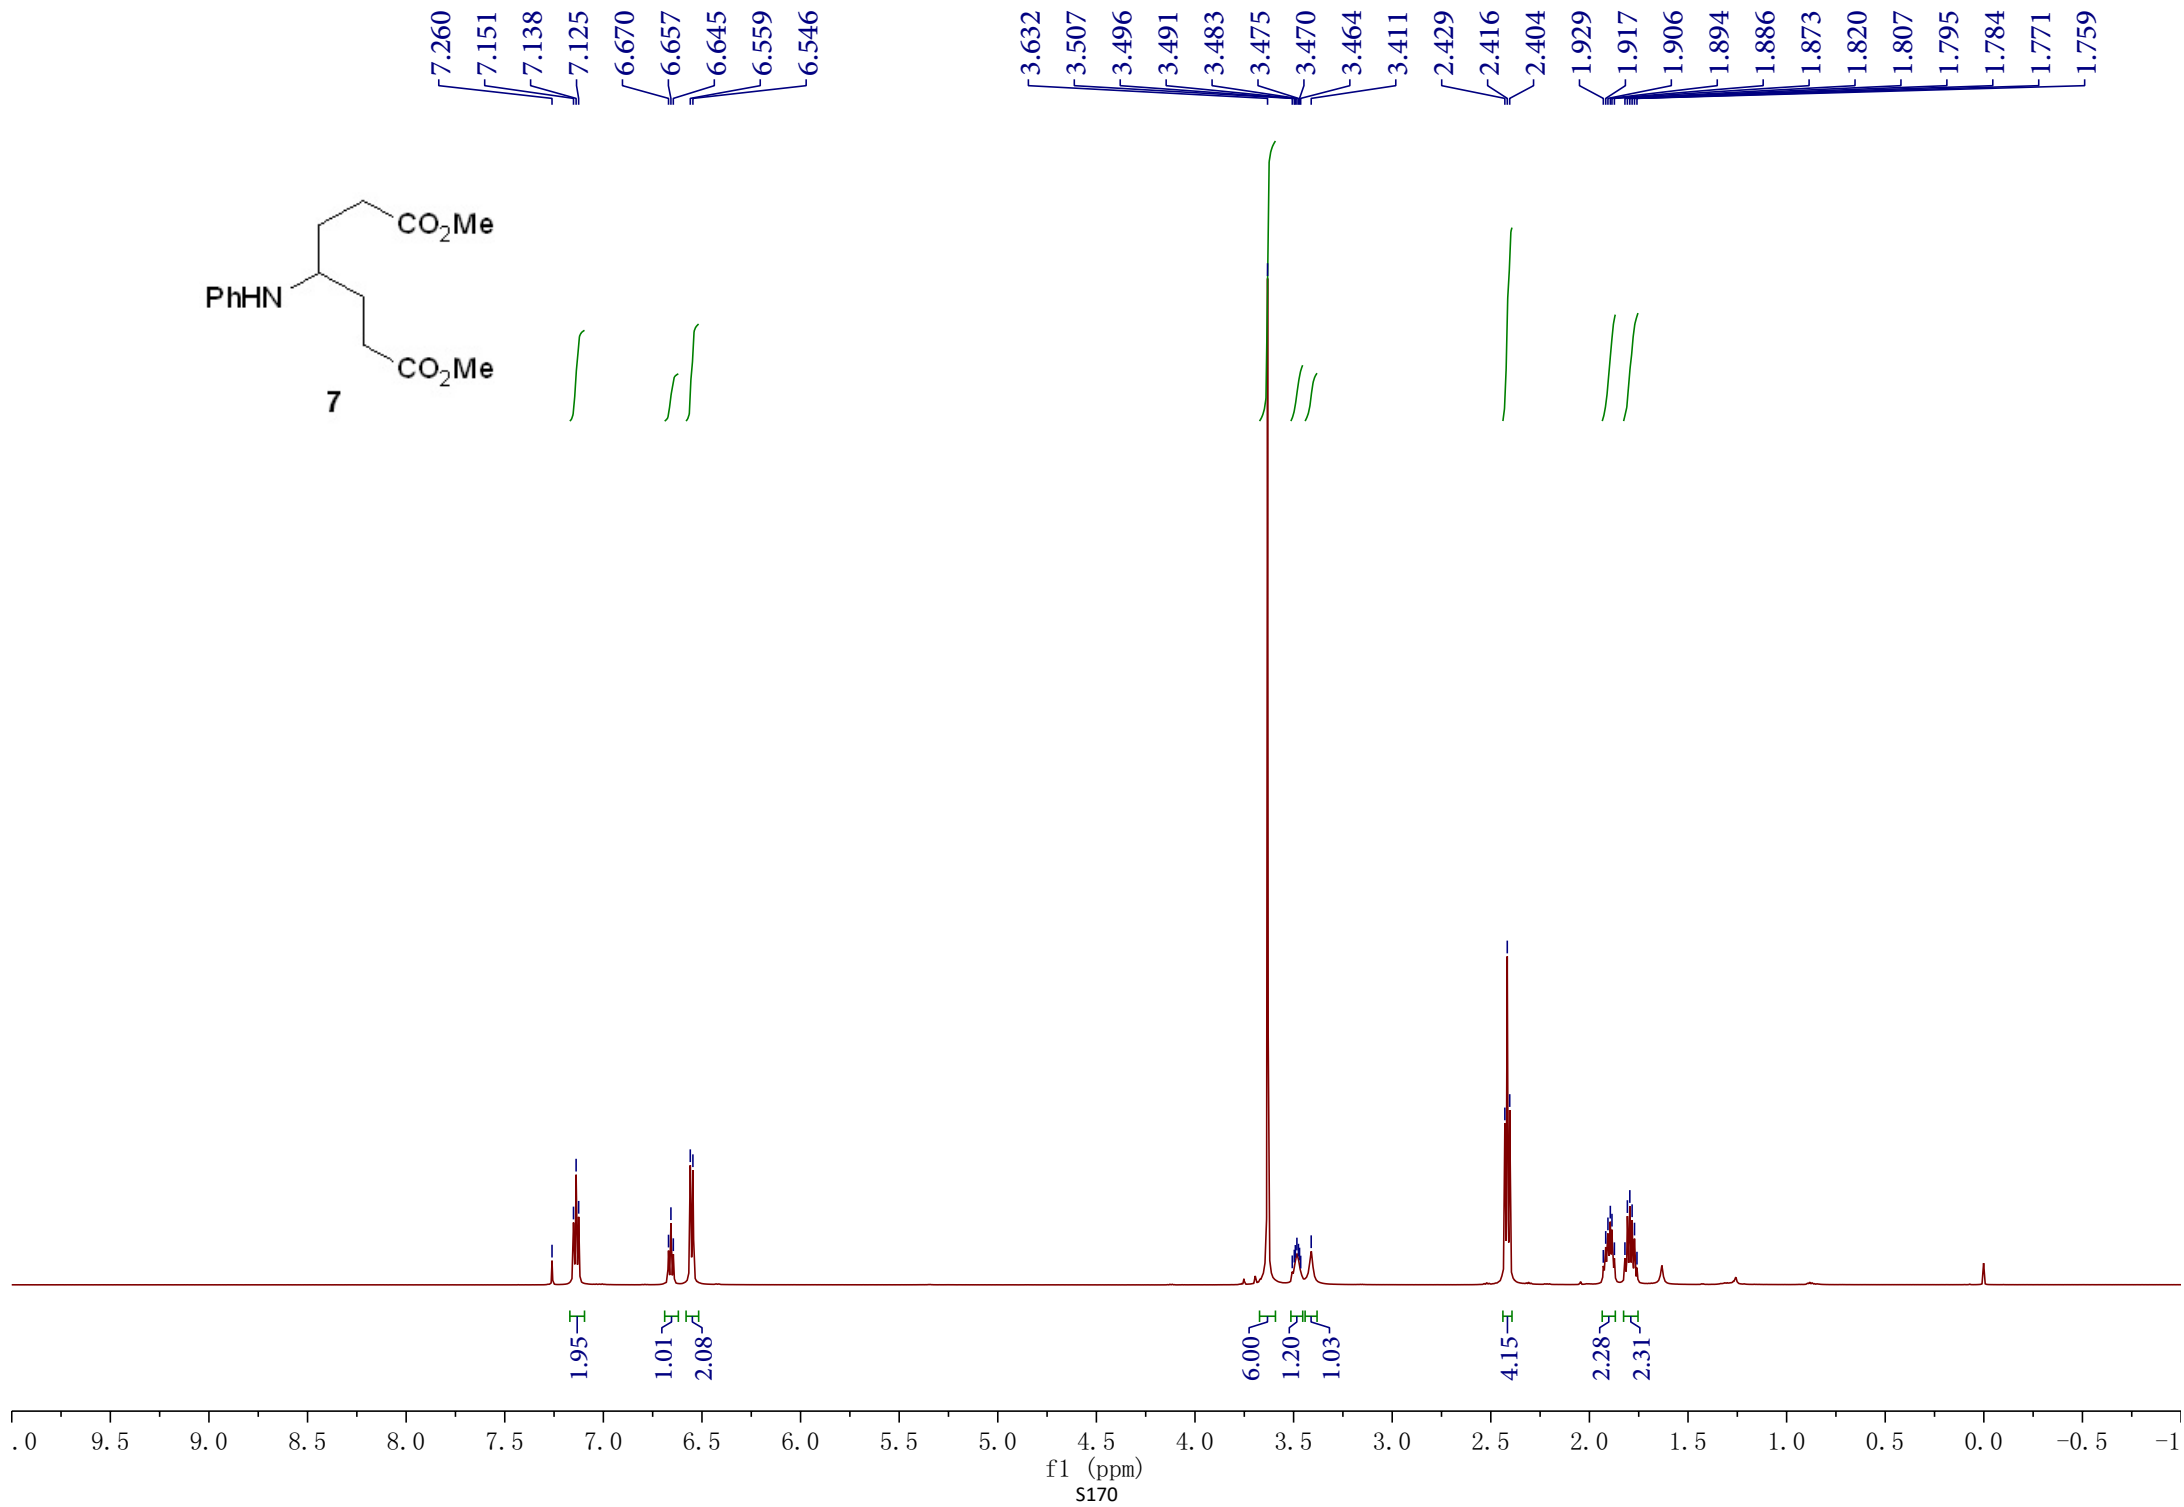

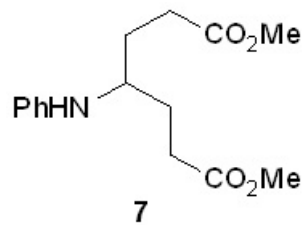

174.102

147.641

129.412

117.215

112.864

77.312

77.100

76.890

52.084

51.694

30.745

30.349

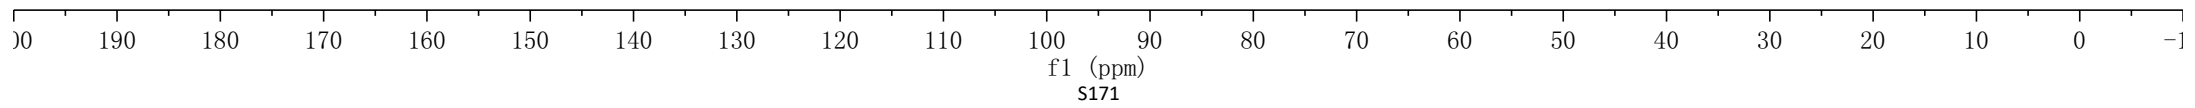

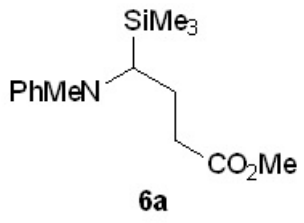

7.260 7.208 7.190 7.186 7.168 6.706 6.686 6.637 6.619 6.601 3.593 3.429 3.420 3.398 3.389 2.800 2.394 2.373 2.354 2.341 2.319 2.276 2.256 2.236 2.216 2.100 2.079 2.064 2.050 2.034 2.013 1.999 1.927 1.905 1.891 1.879 1.861 1.851 1.843 0.065

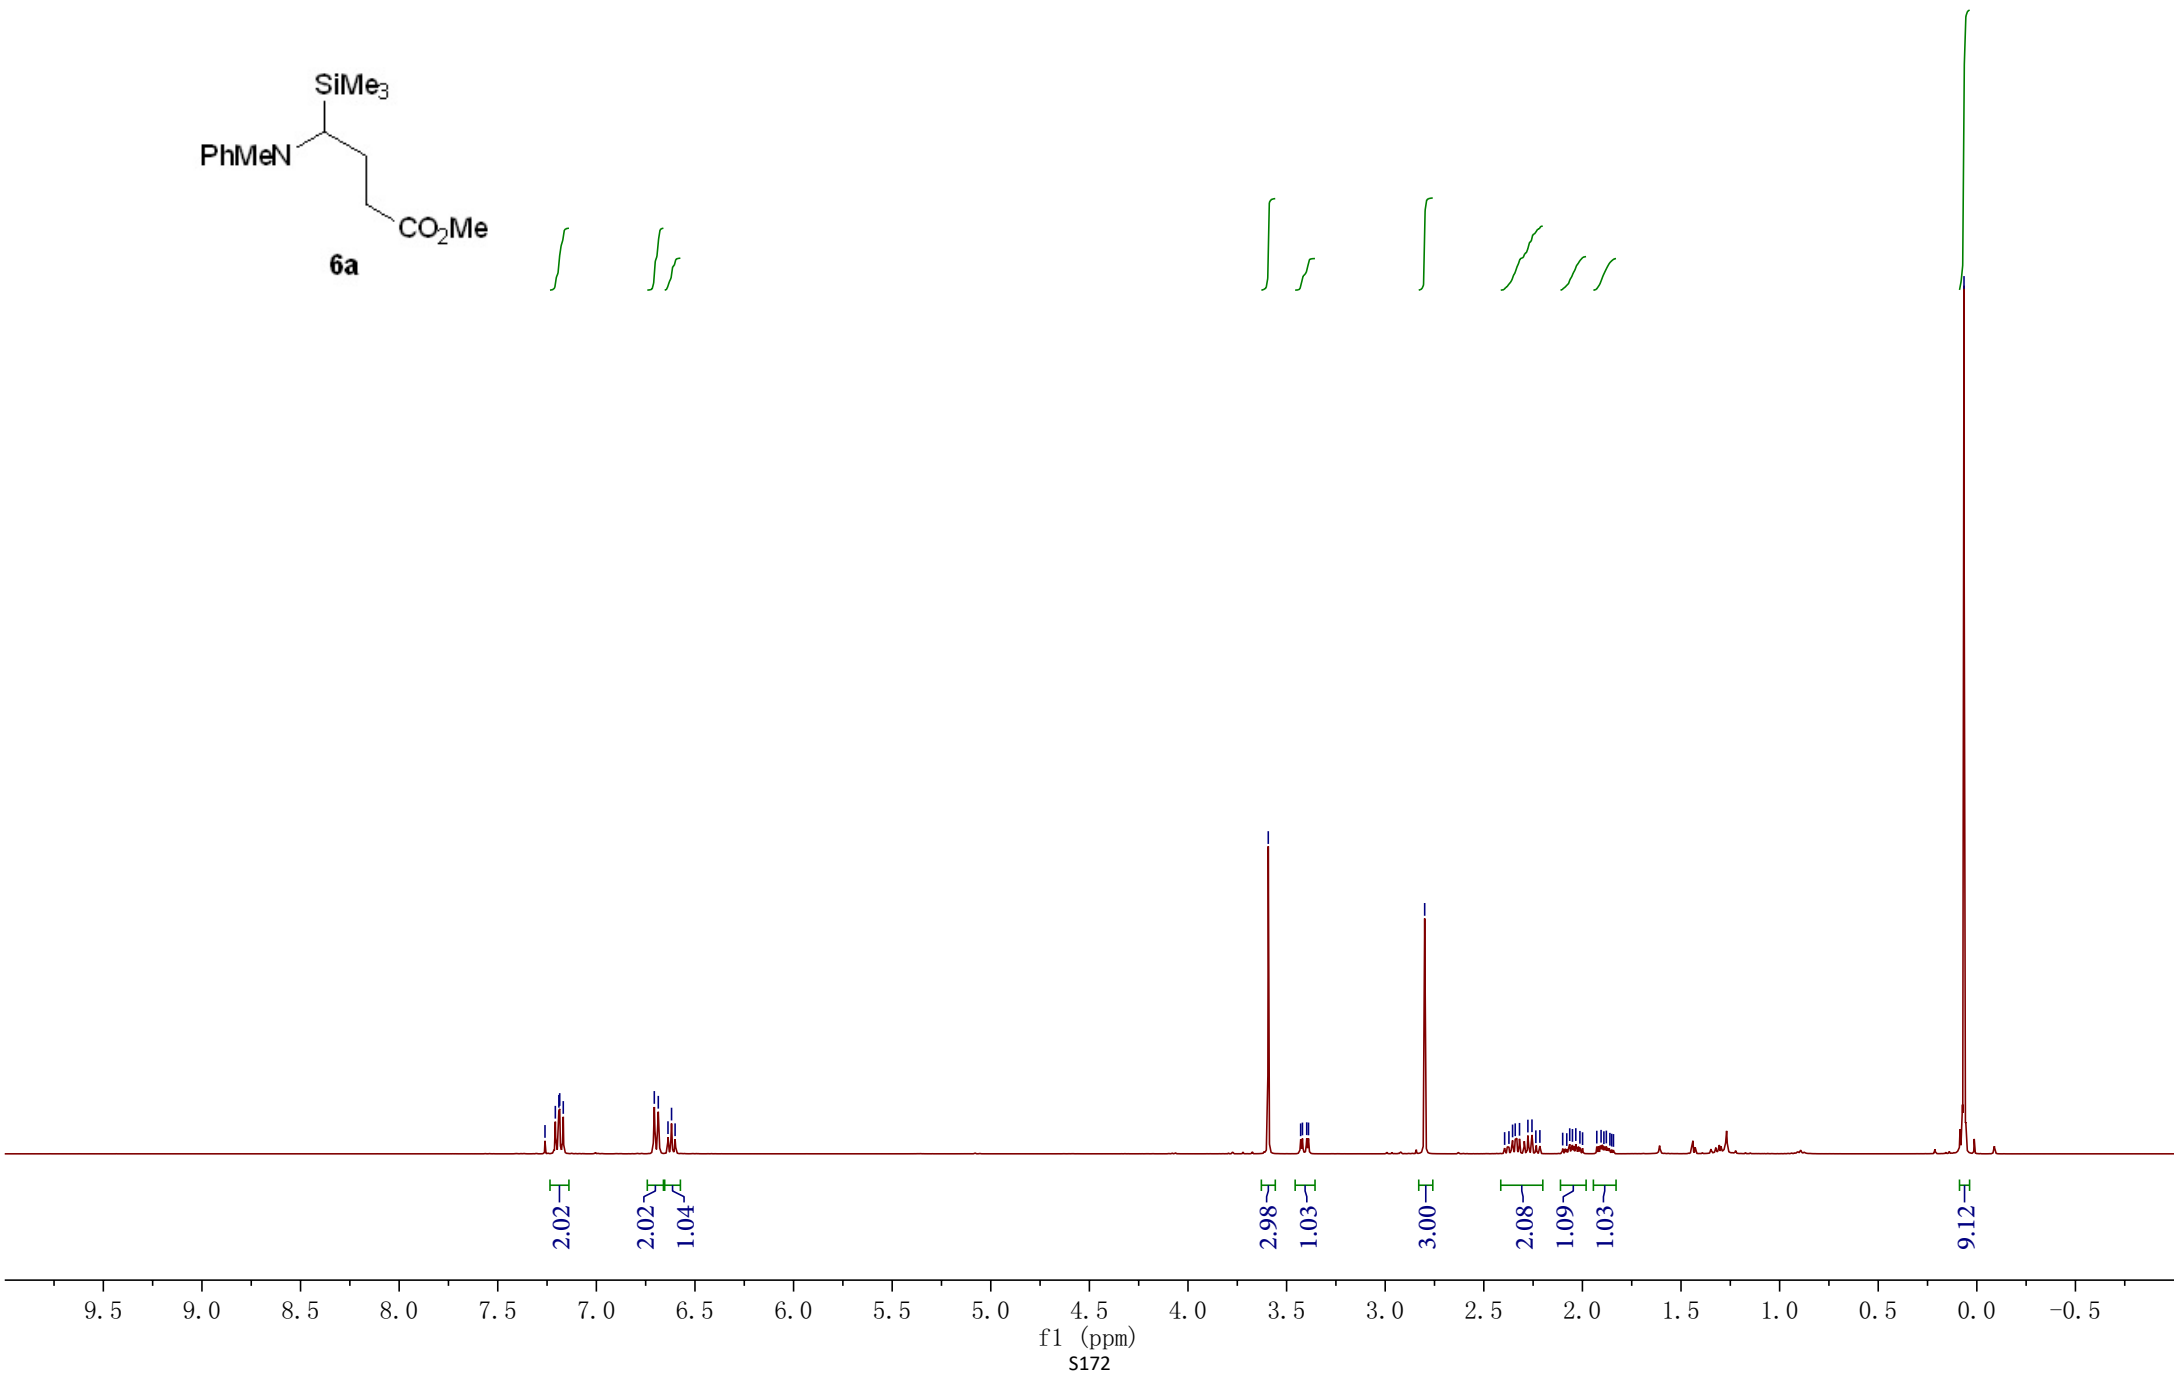



174.237 151.164 129.109 115.371 111.825 77.417 77.100 76.783 51.479 49.979 33.974 32.257 24.008 -1.651

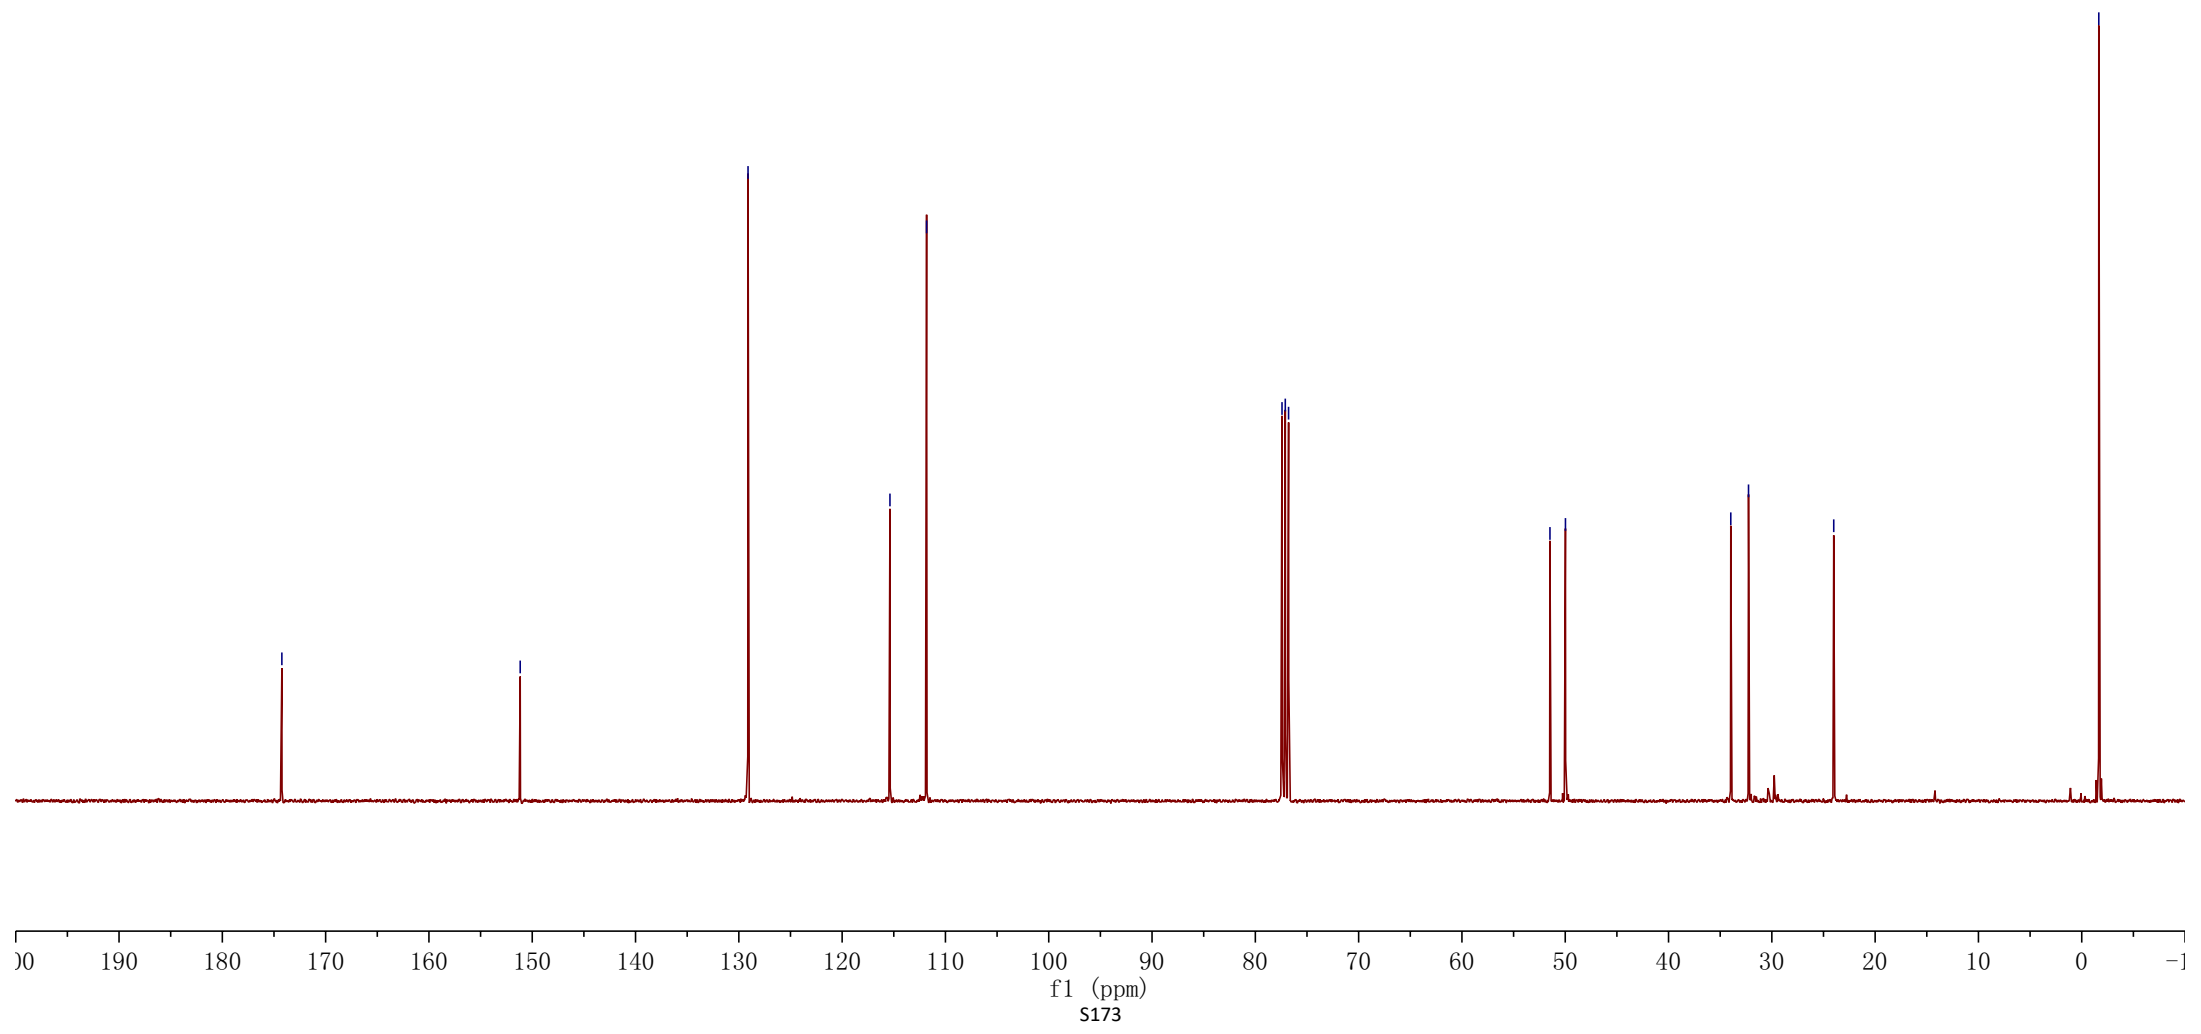

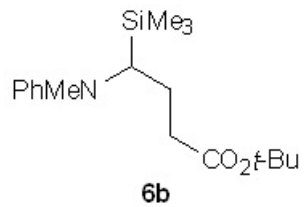

7.260  
7.197  
7.179  
7.175  
7.157  
6.709  
6.689  
6.623  
6.605  
6.587  
3.412  
3.403  
3.382  
3.373  
2.792  
2.304  
2.284  
2.250  
2.213  
2.194  
2.175  
2.153  
2.134  
2.026  
2.013  
1.990  
1.977  
1.960  
1.940  
1.926  
1.874  
1.853  
1.835  
1.819  
1.810  
1.799  
1.790  
1.399  
0.052

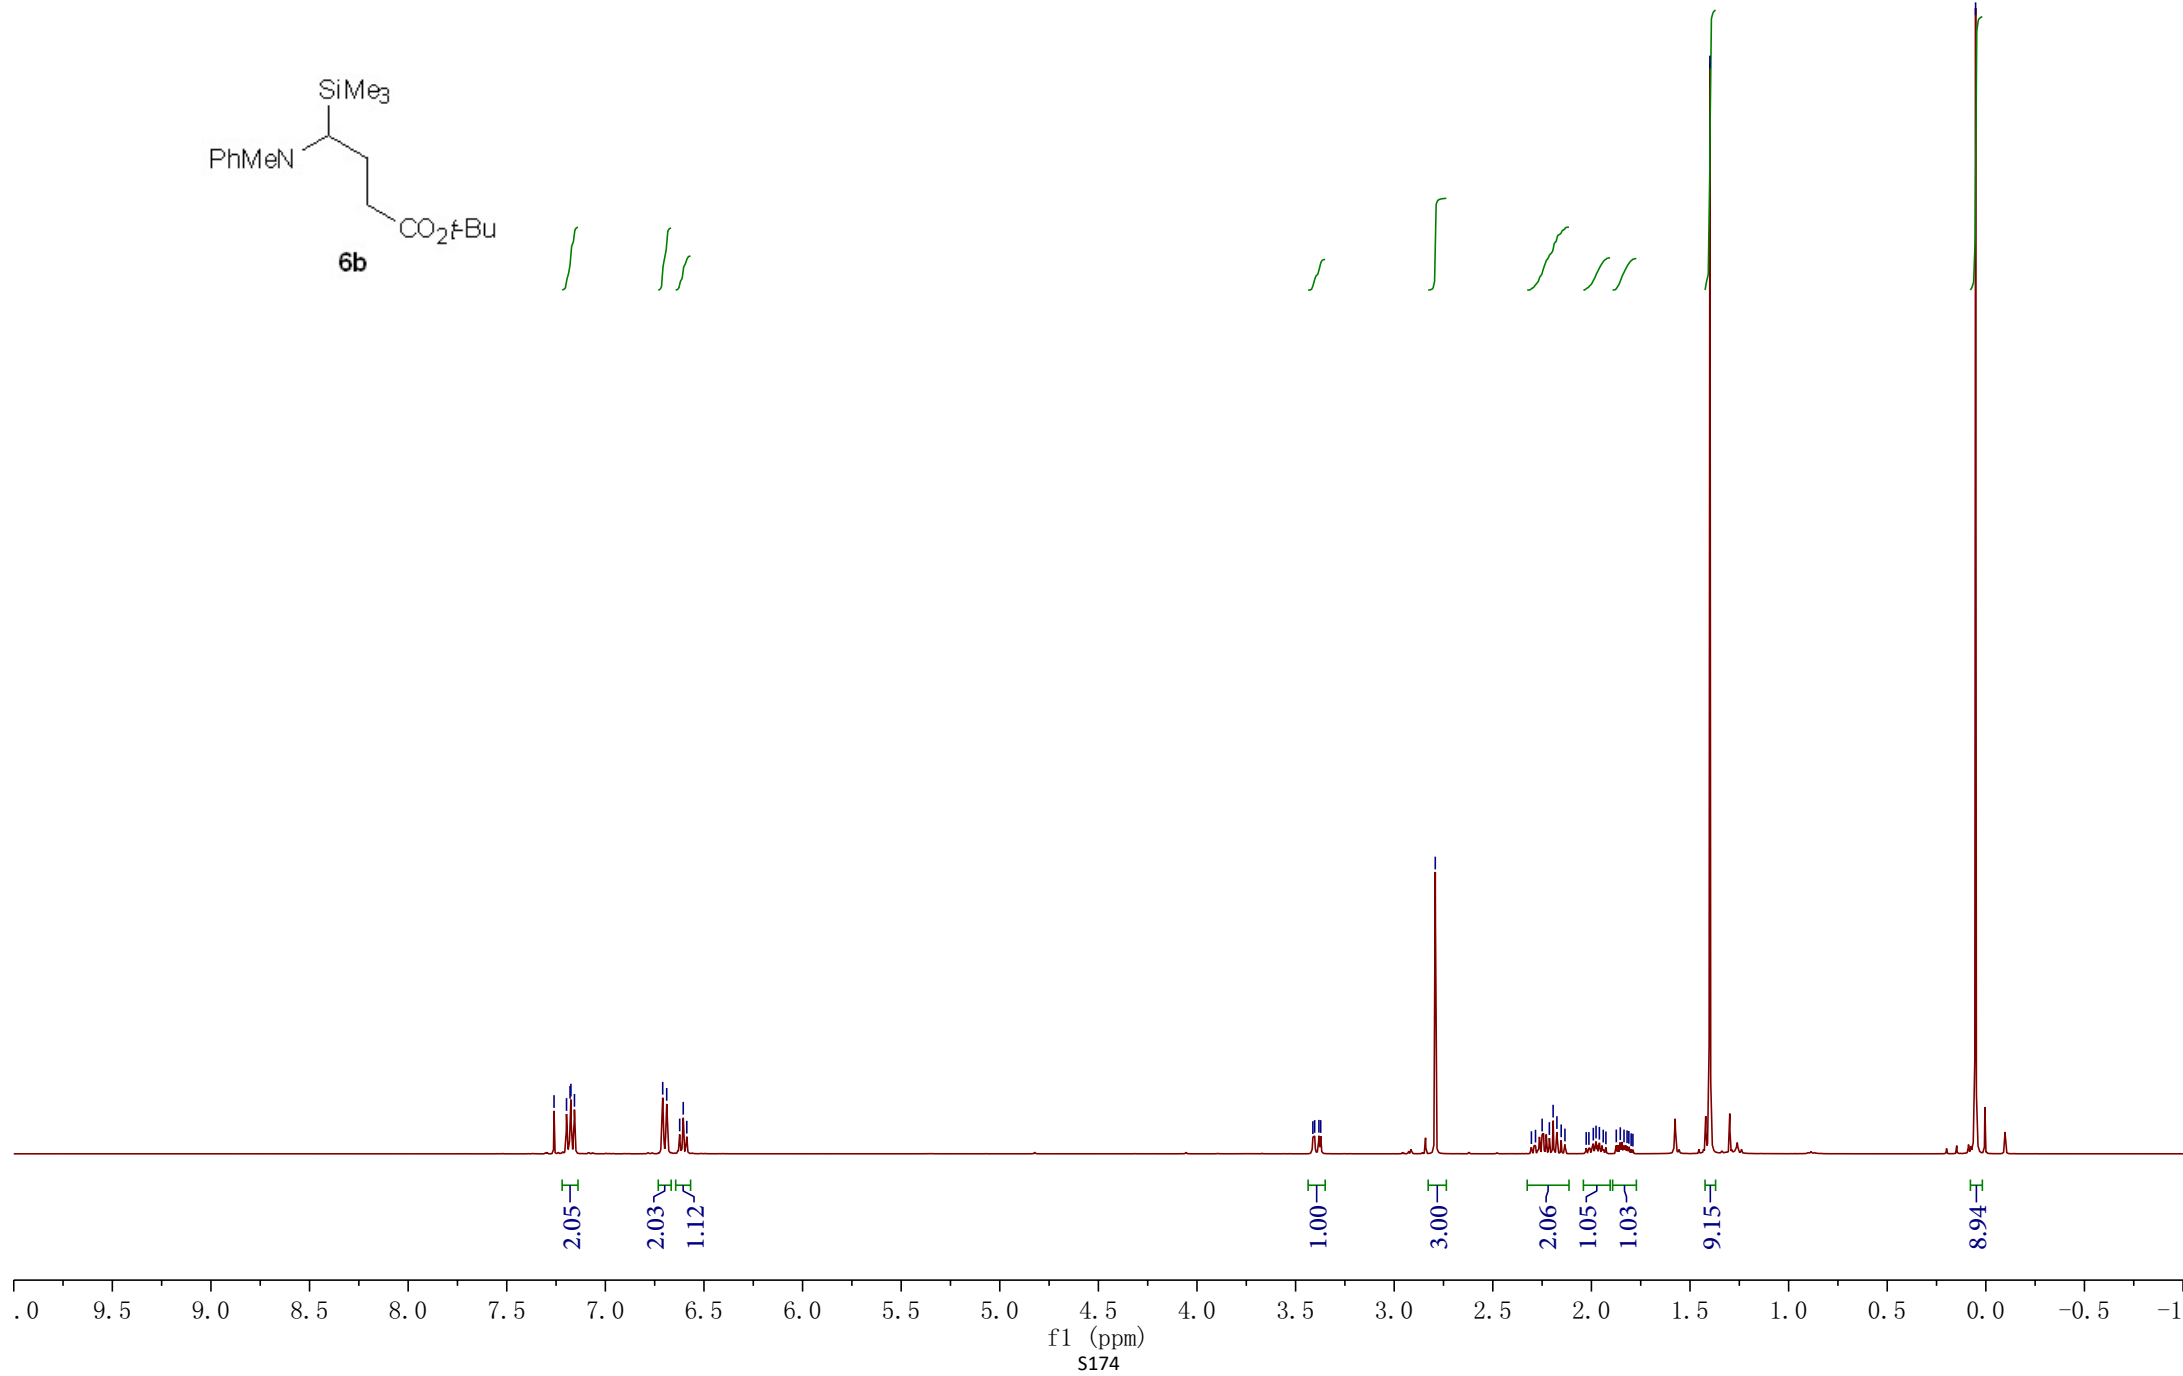

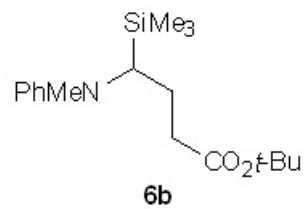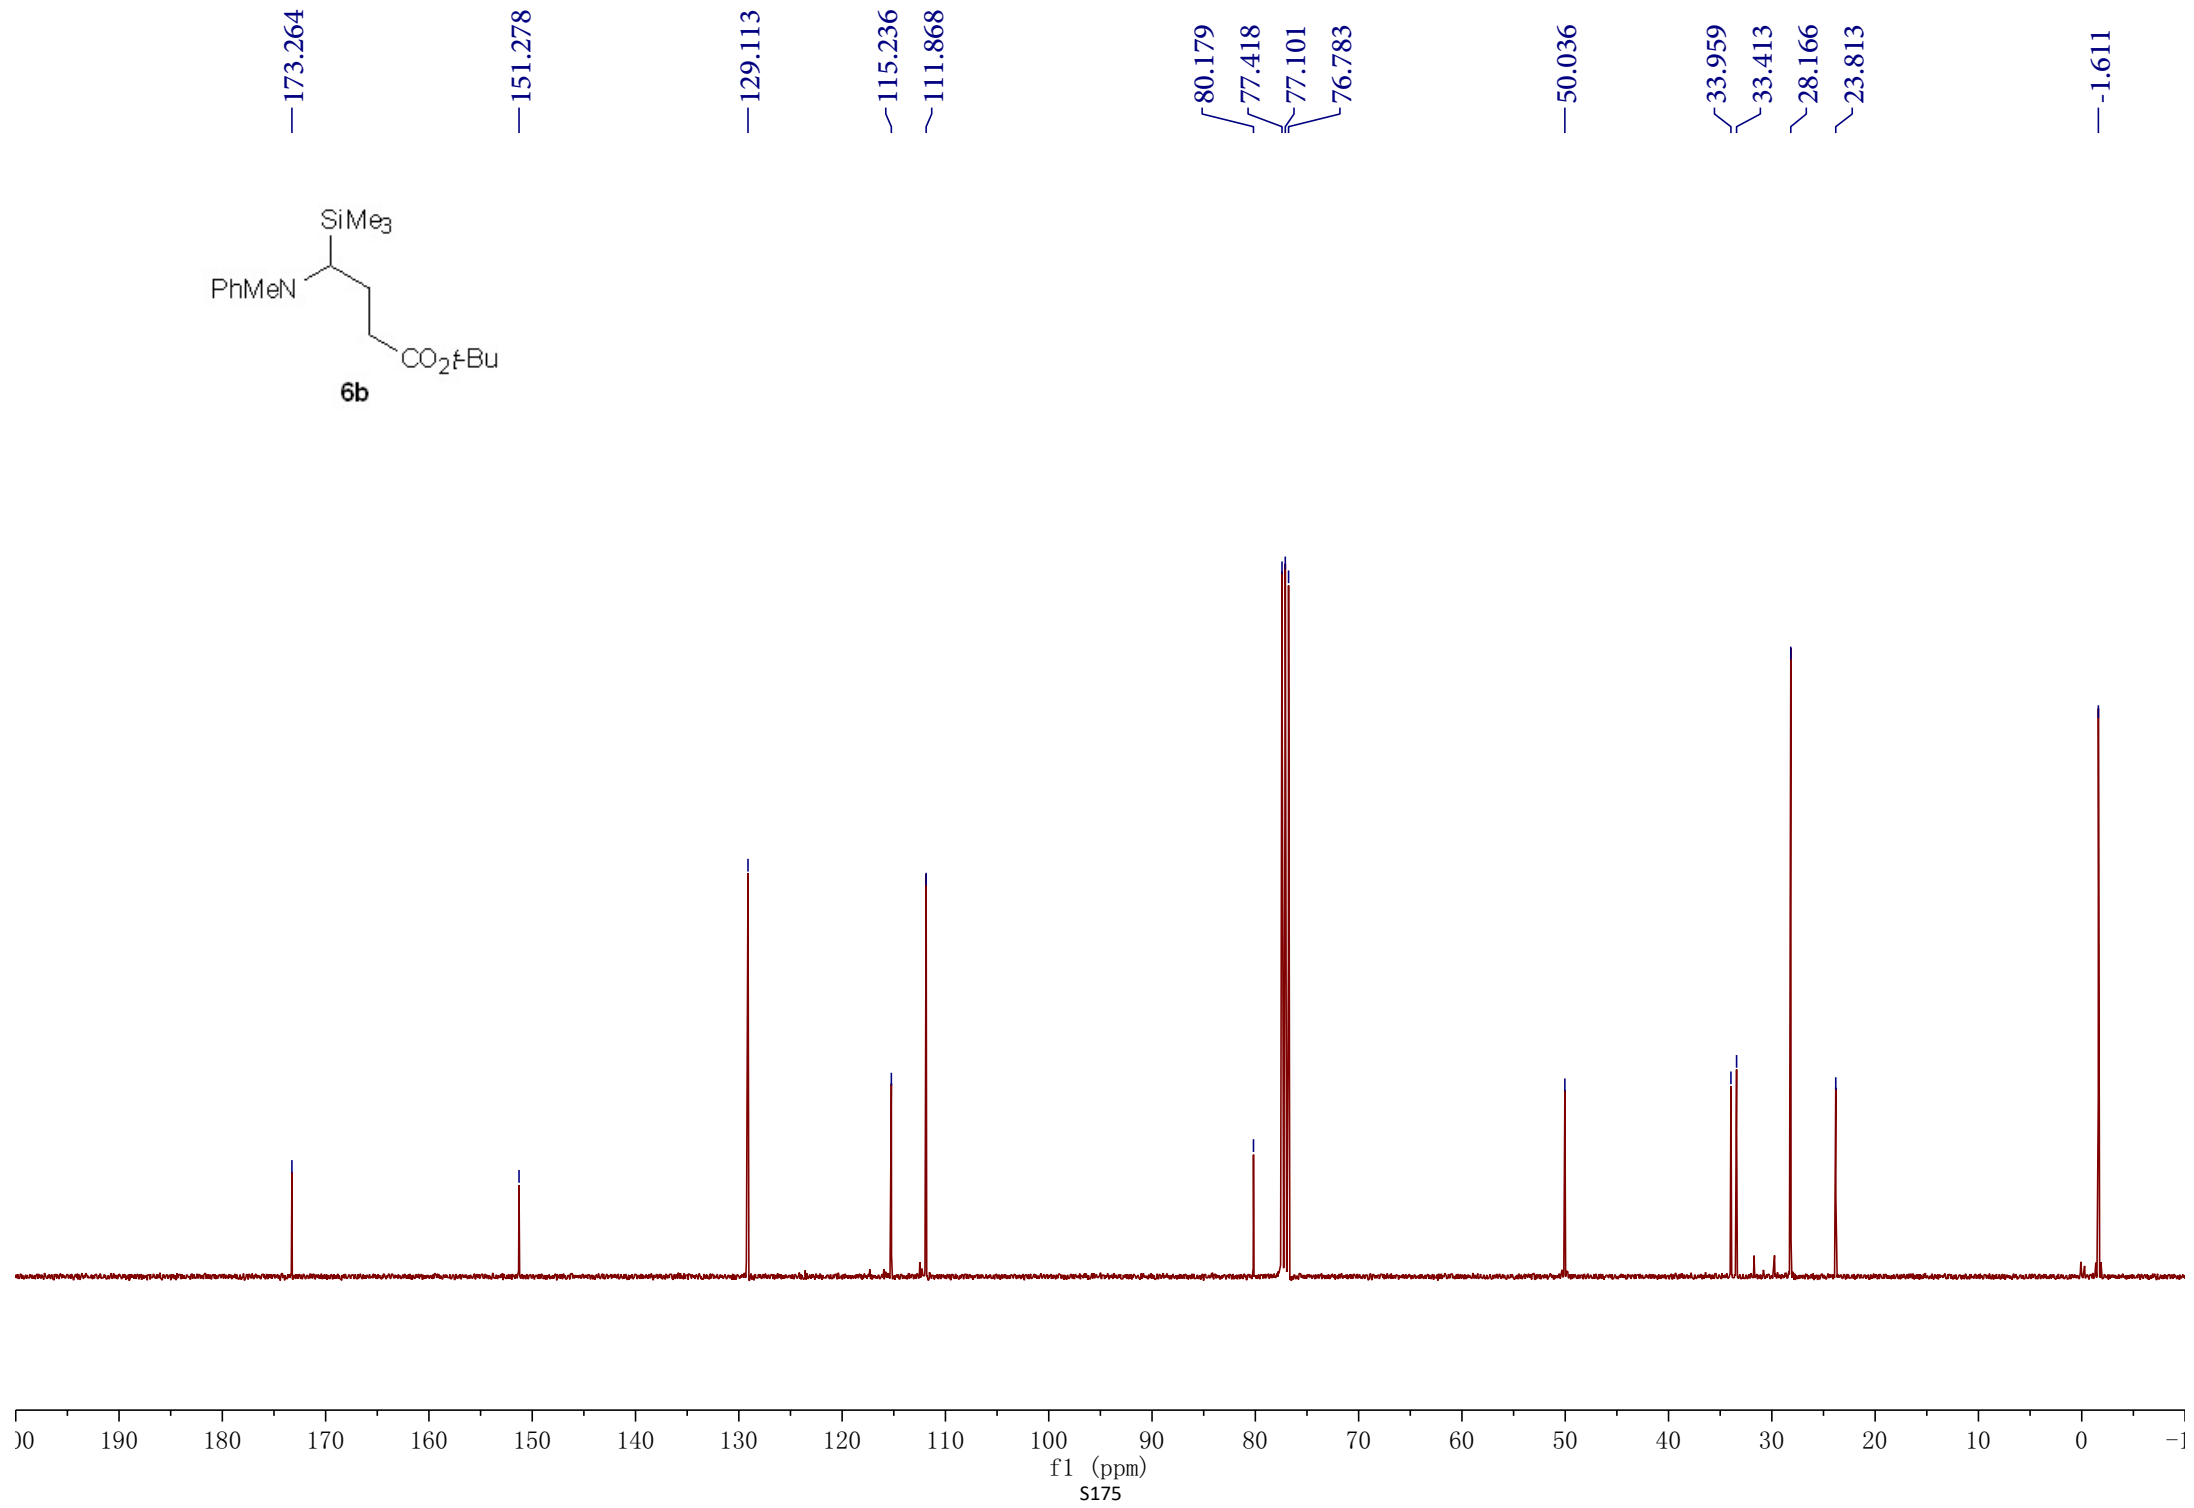

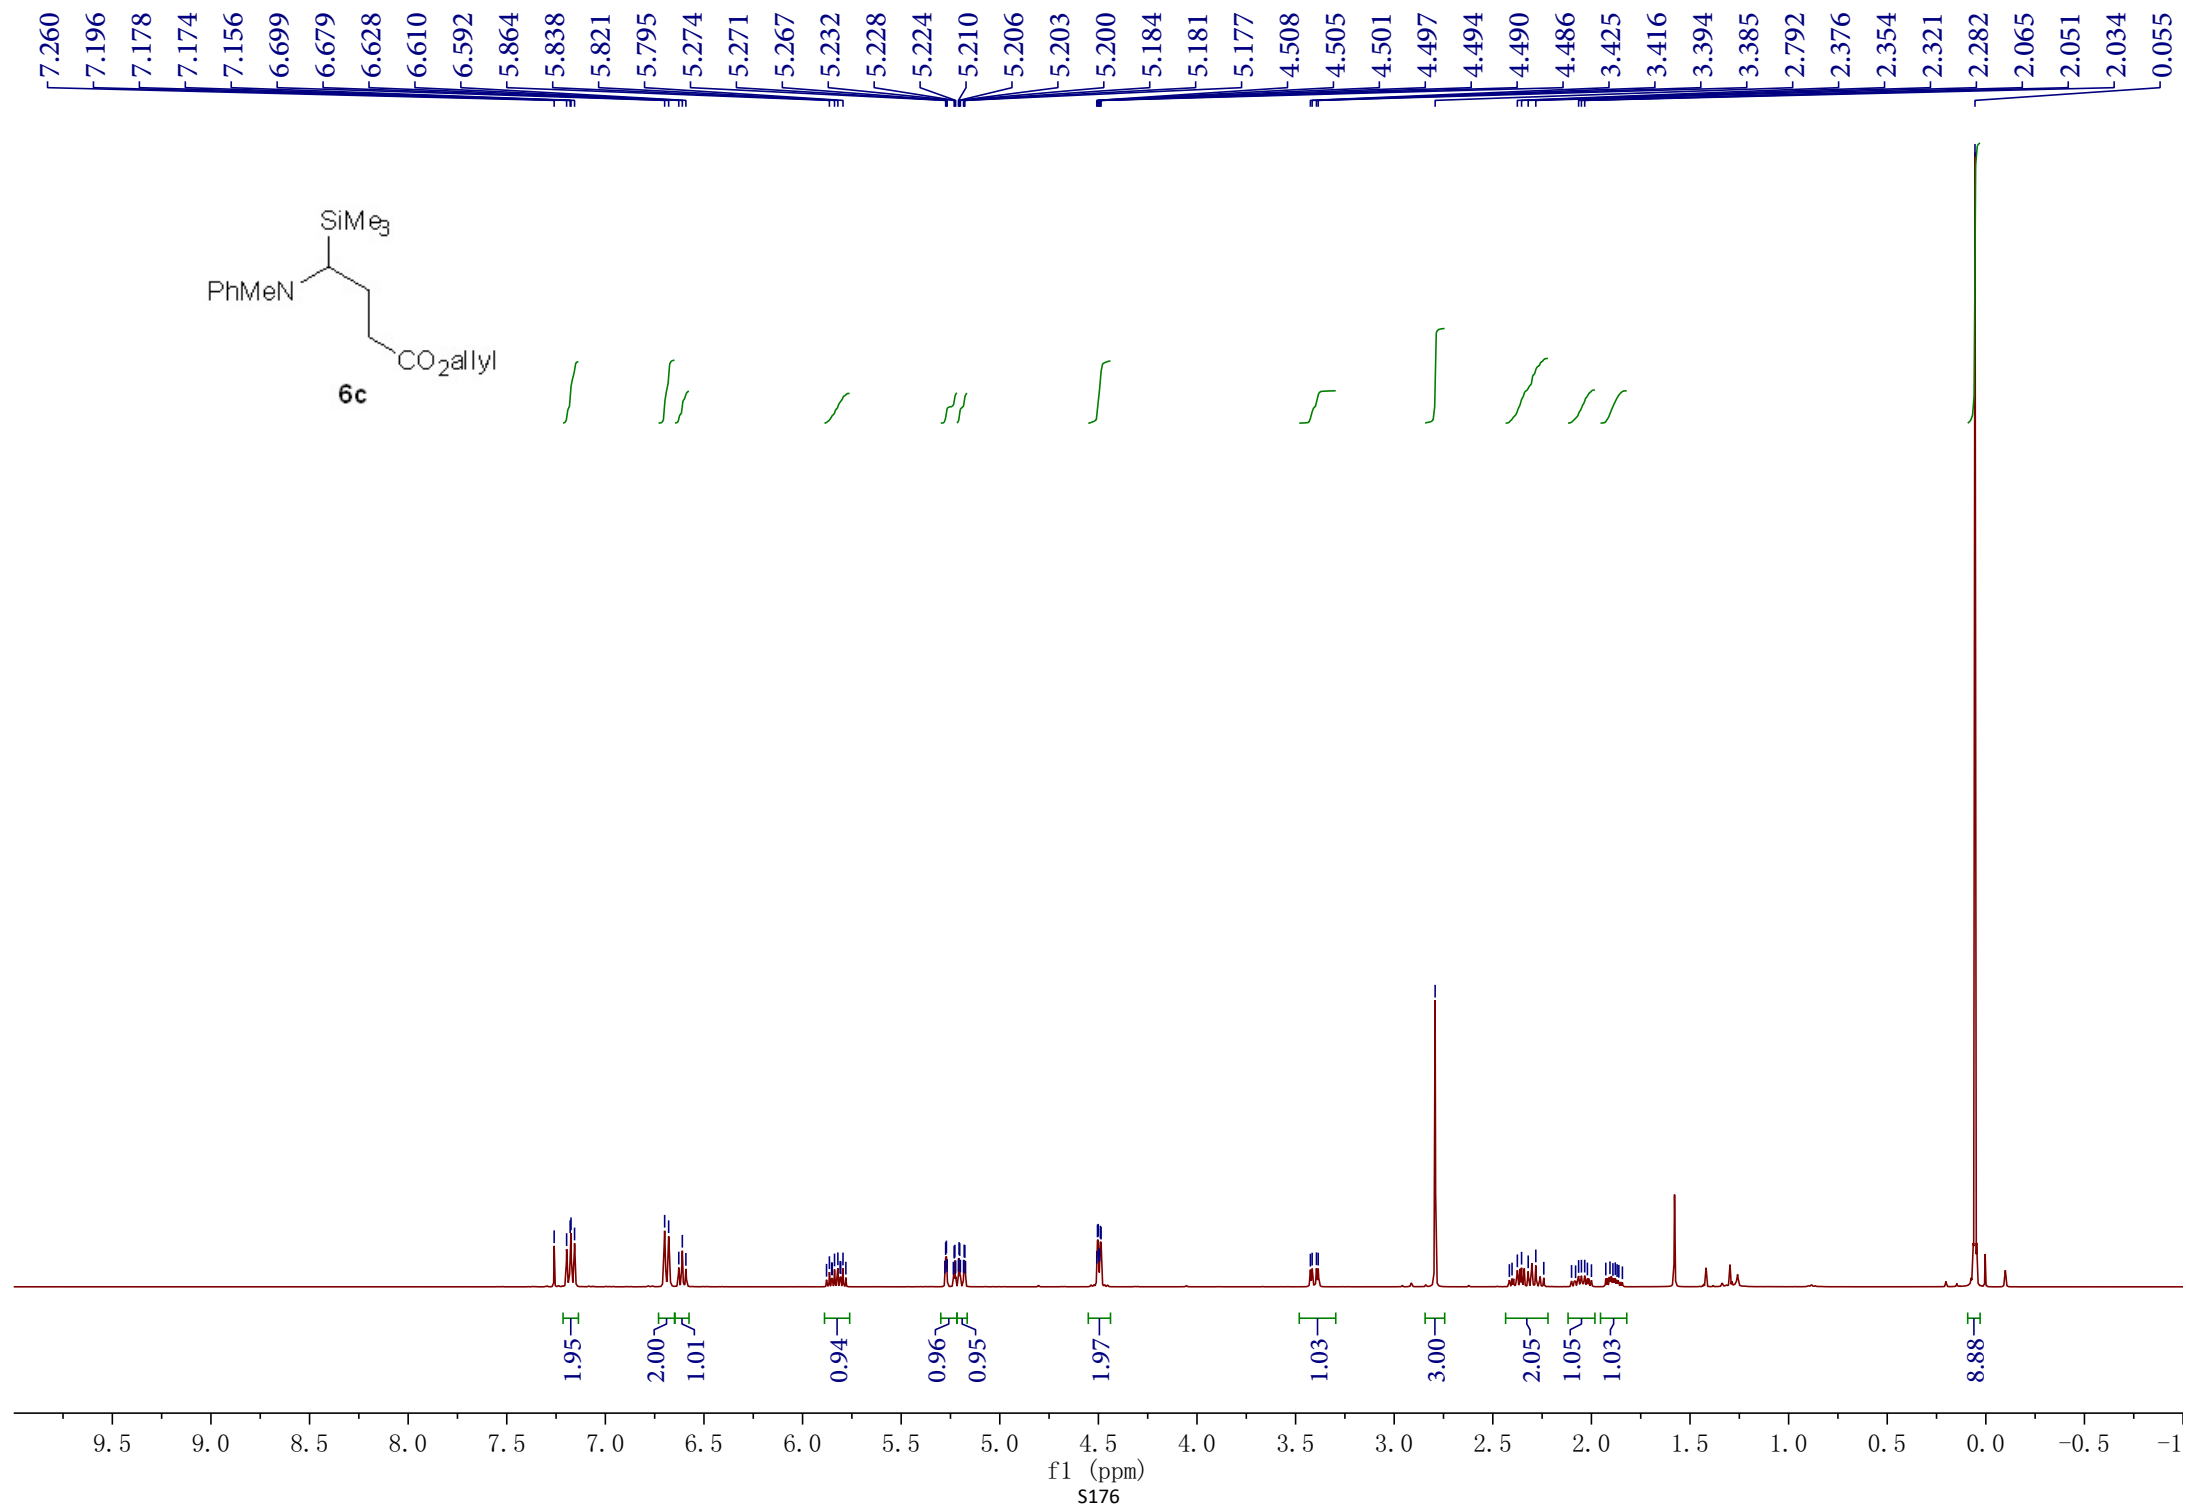



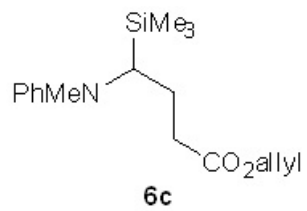

— 173.484

— 151.173

~ 132.293

~ 129.142

~ 118.315

~ 115.396

~ 111.856

77.418

77.100

76.782

— 65.122

— 50.020

~ 33.999

~ 32.402

~ 23.974

— -1.631

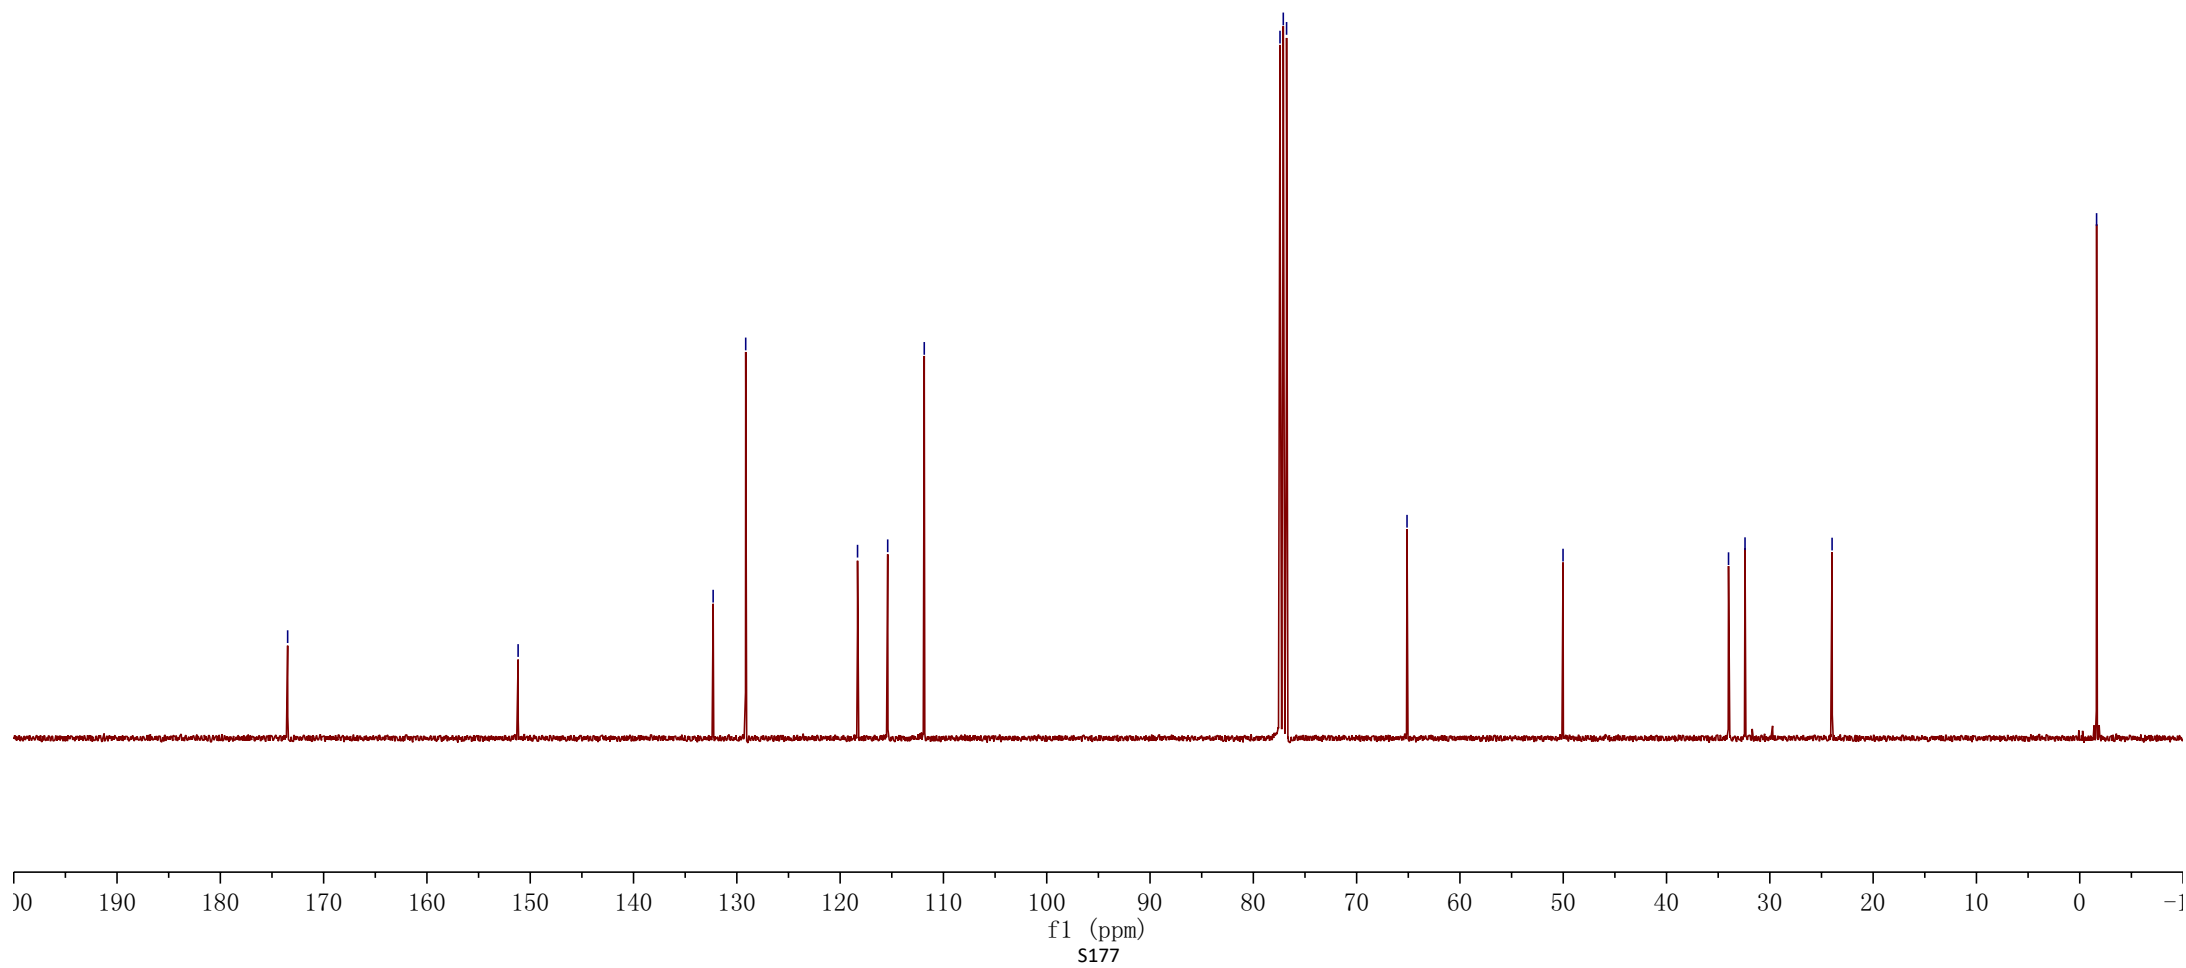

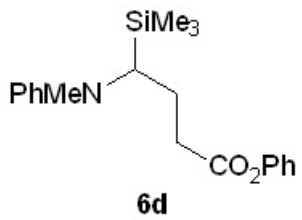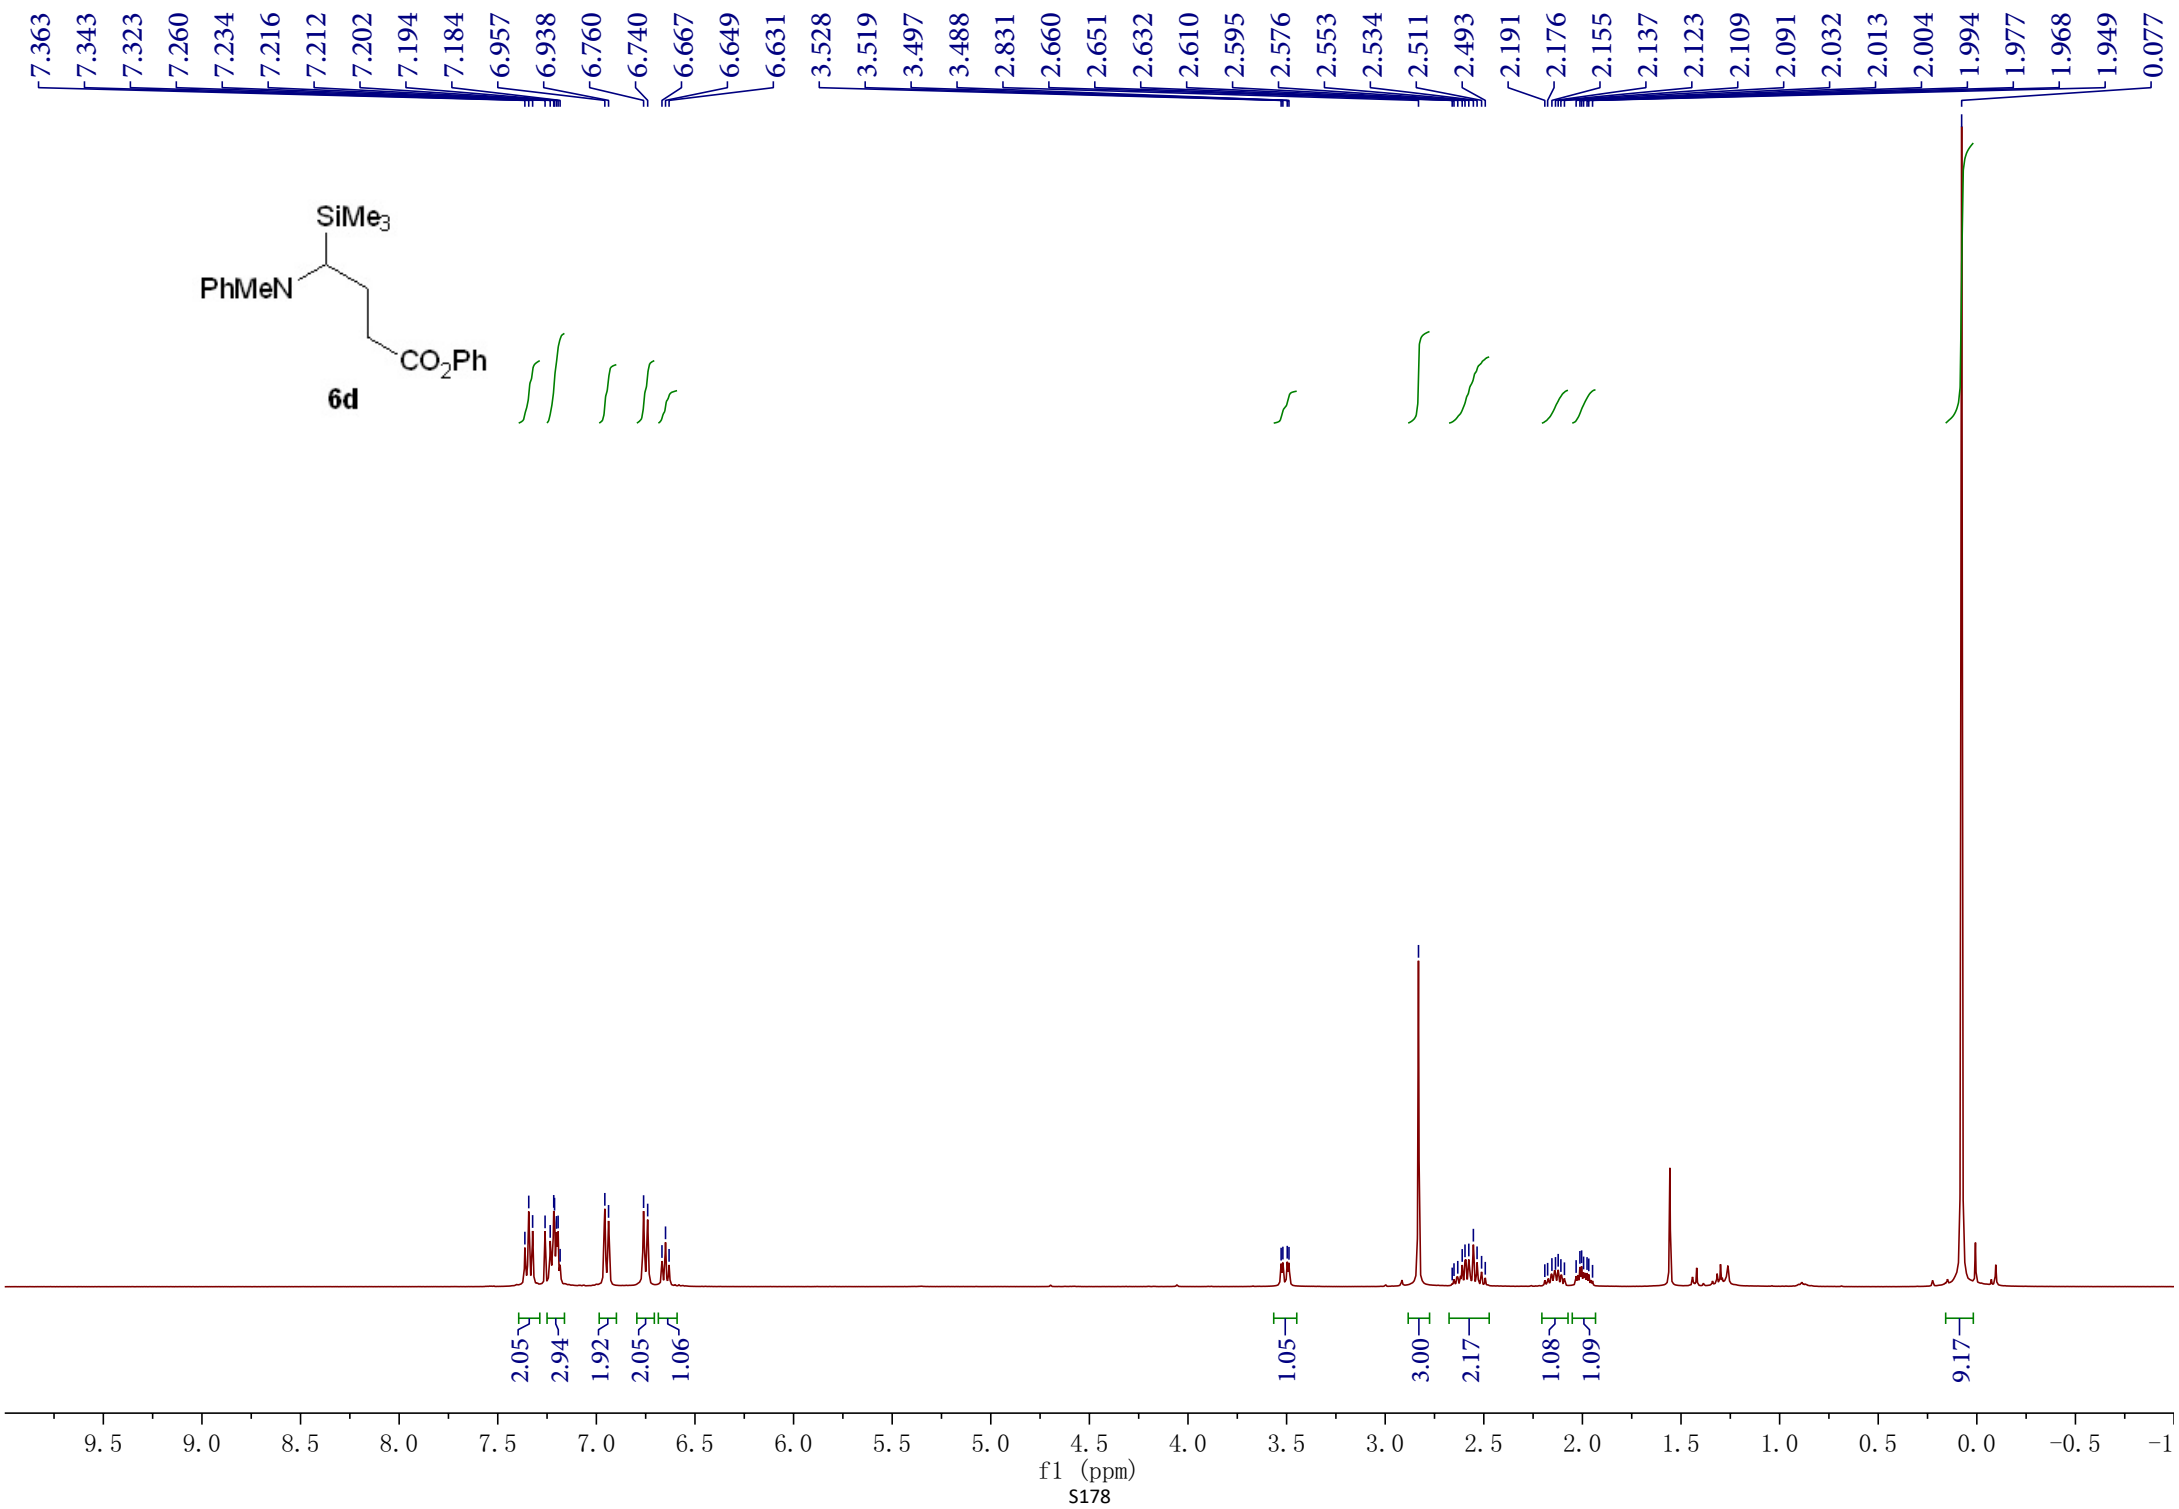

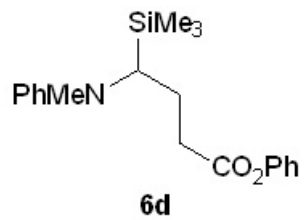

— 172.337

151.267

150.757

129.409

129.261

125.770

121.663

115.595

111.978

77.418

77.101

76.784

— 50.010

34.092

32.349

23.796

— -1.614

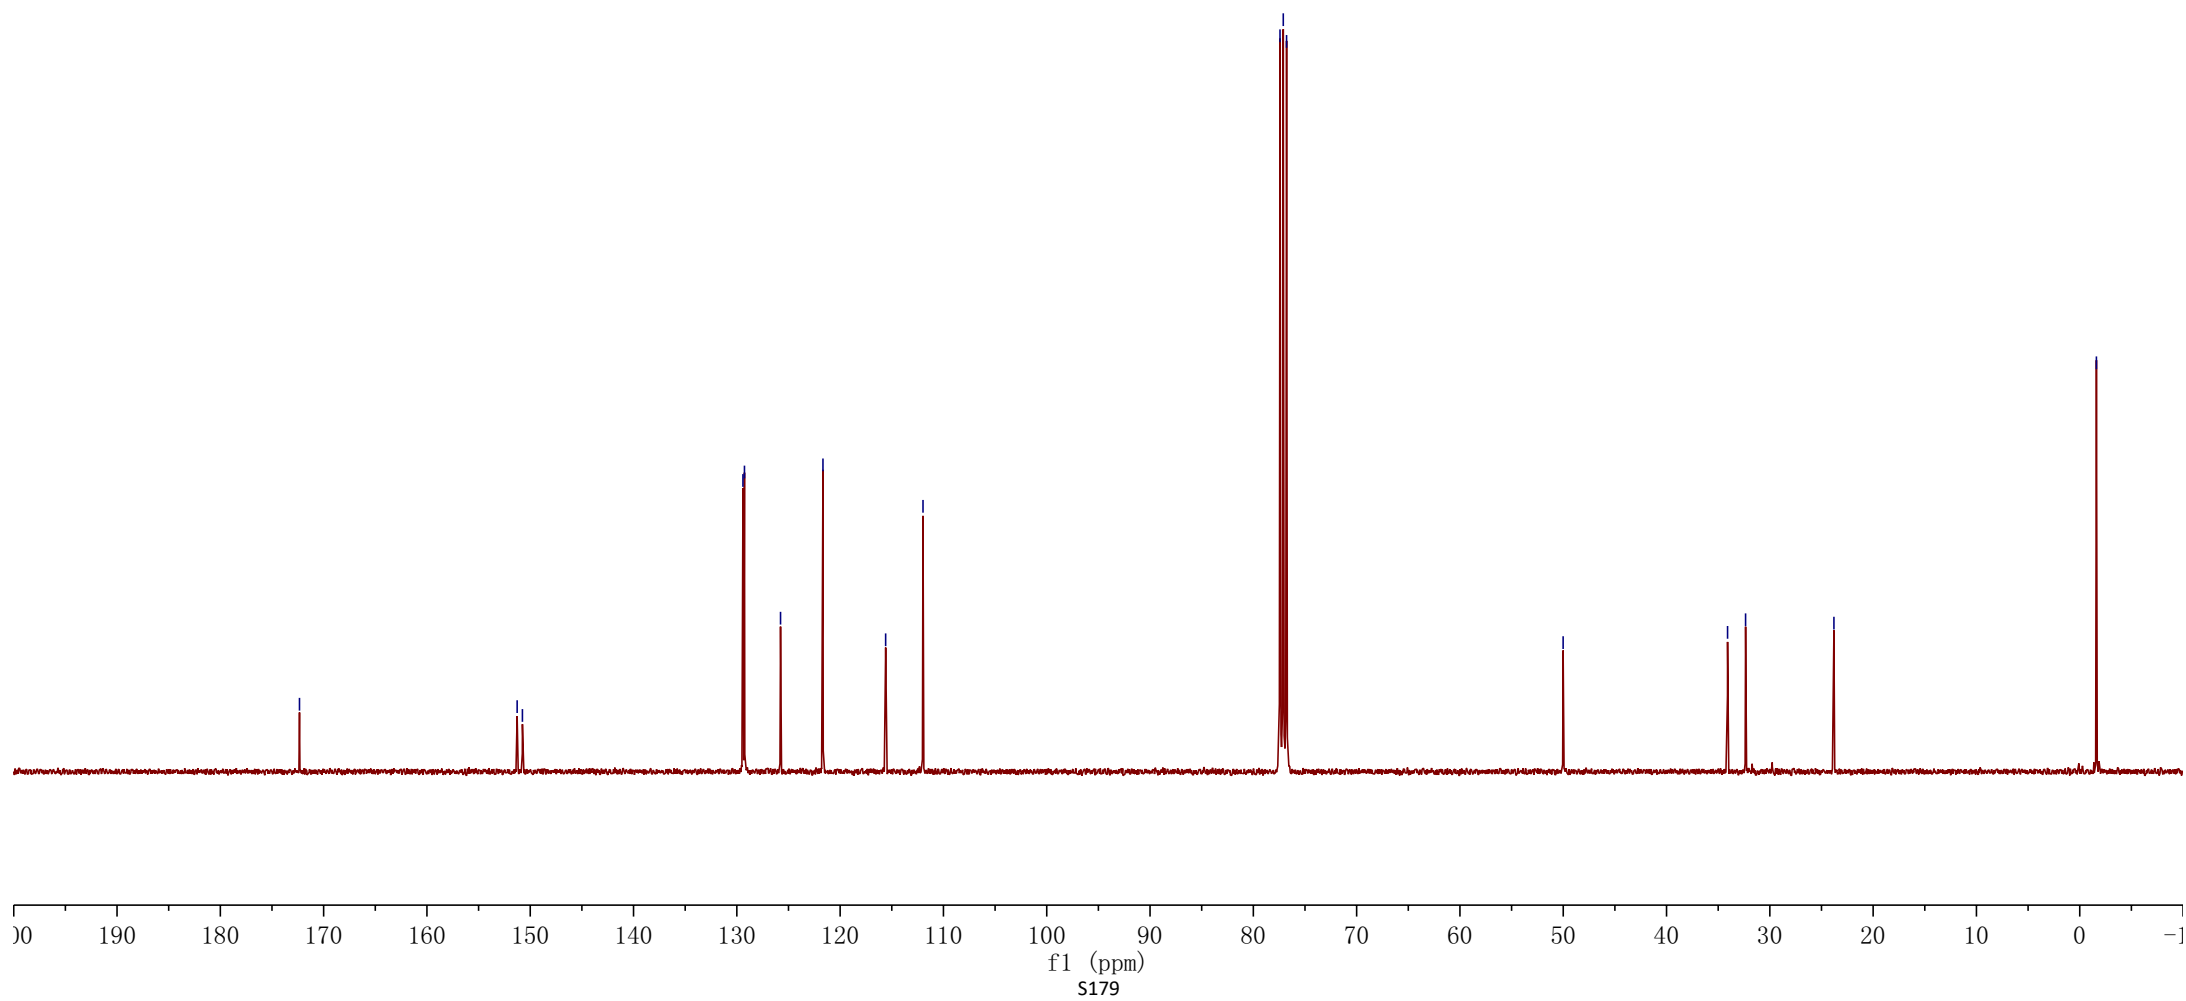

7.260 7.202 7.185 7.164 7.146 6.713 6.692 6.662 6.641 6.629 6.612 6.594 3.533 3.501 3.487 3.465 3.457 3.434 3.426 2.776 2.763 2.291 2.259 2.224 2.211 1.880 1.846 1.812 1.782 1.506 1.485 1.470 1.449 1.441 1.161 1.143 1.122 1.105 0.042 0.034

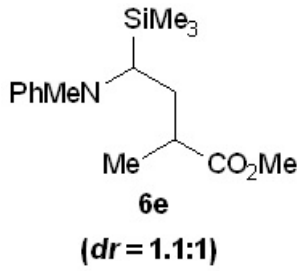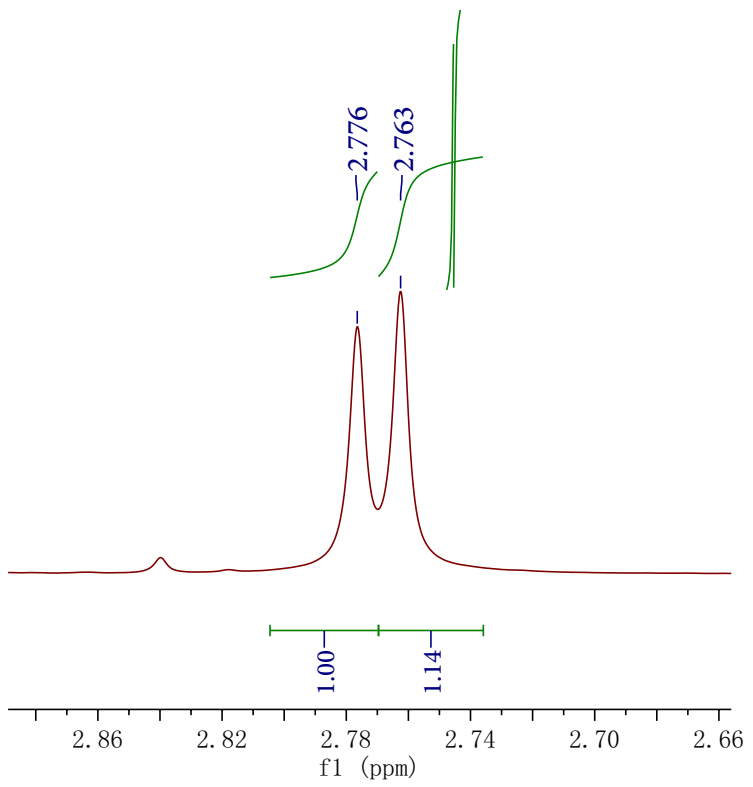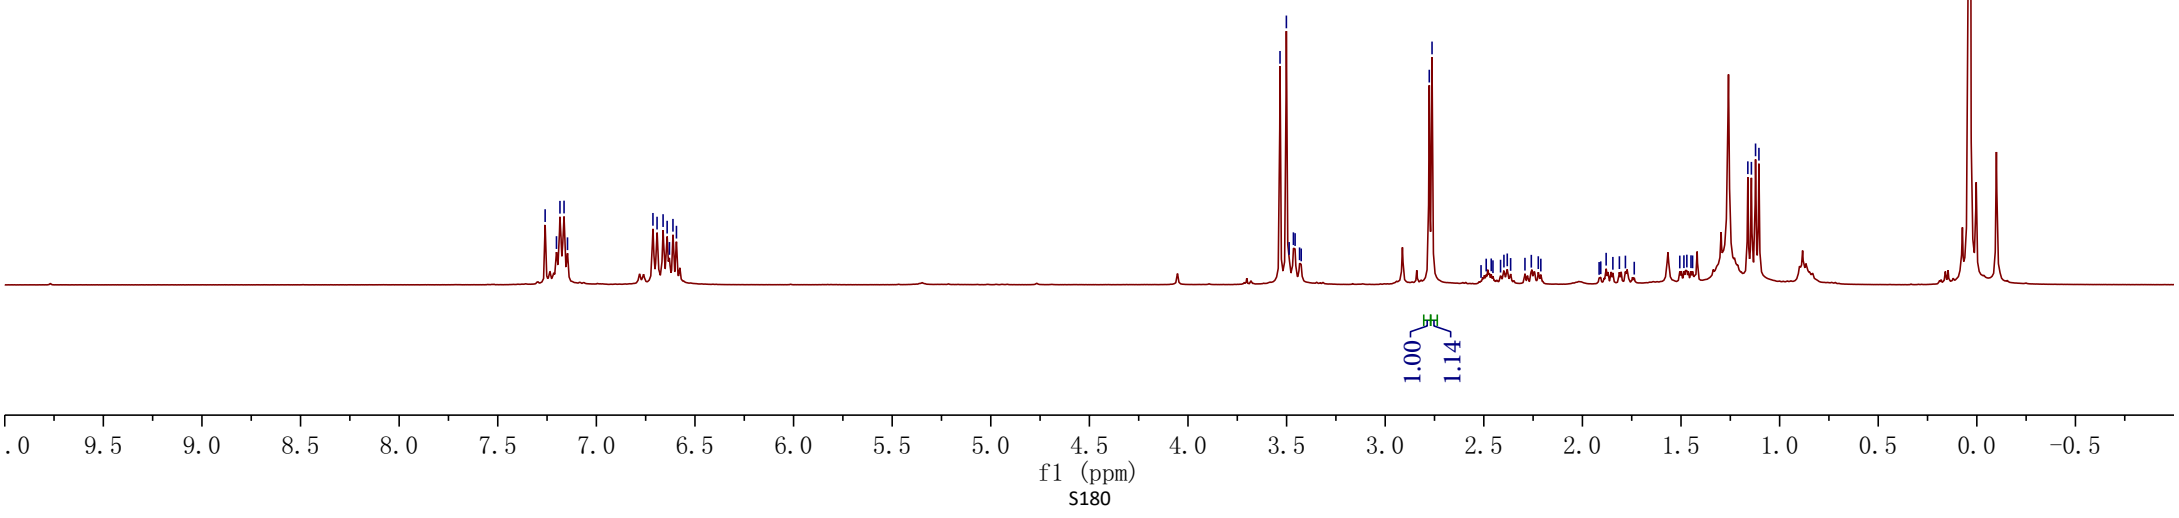

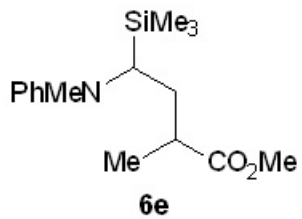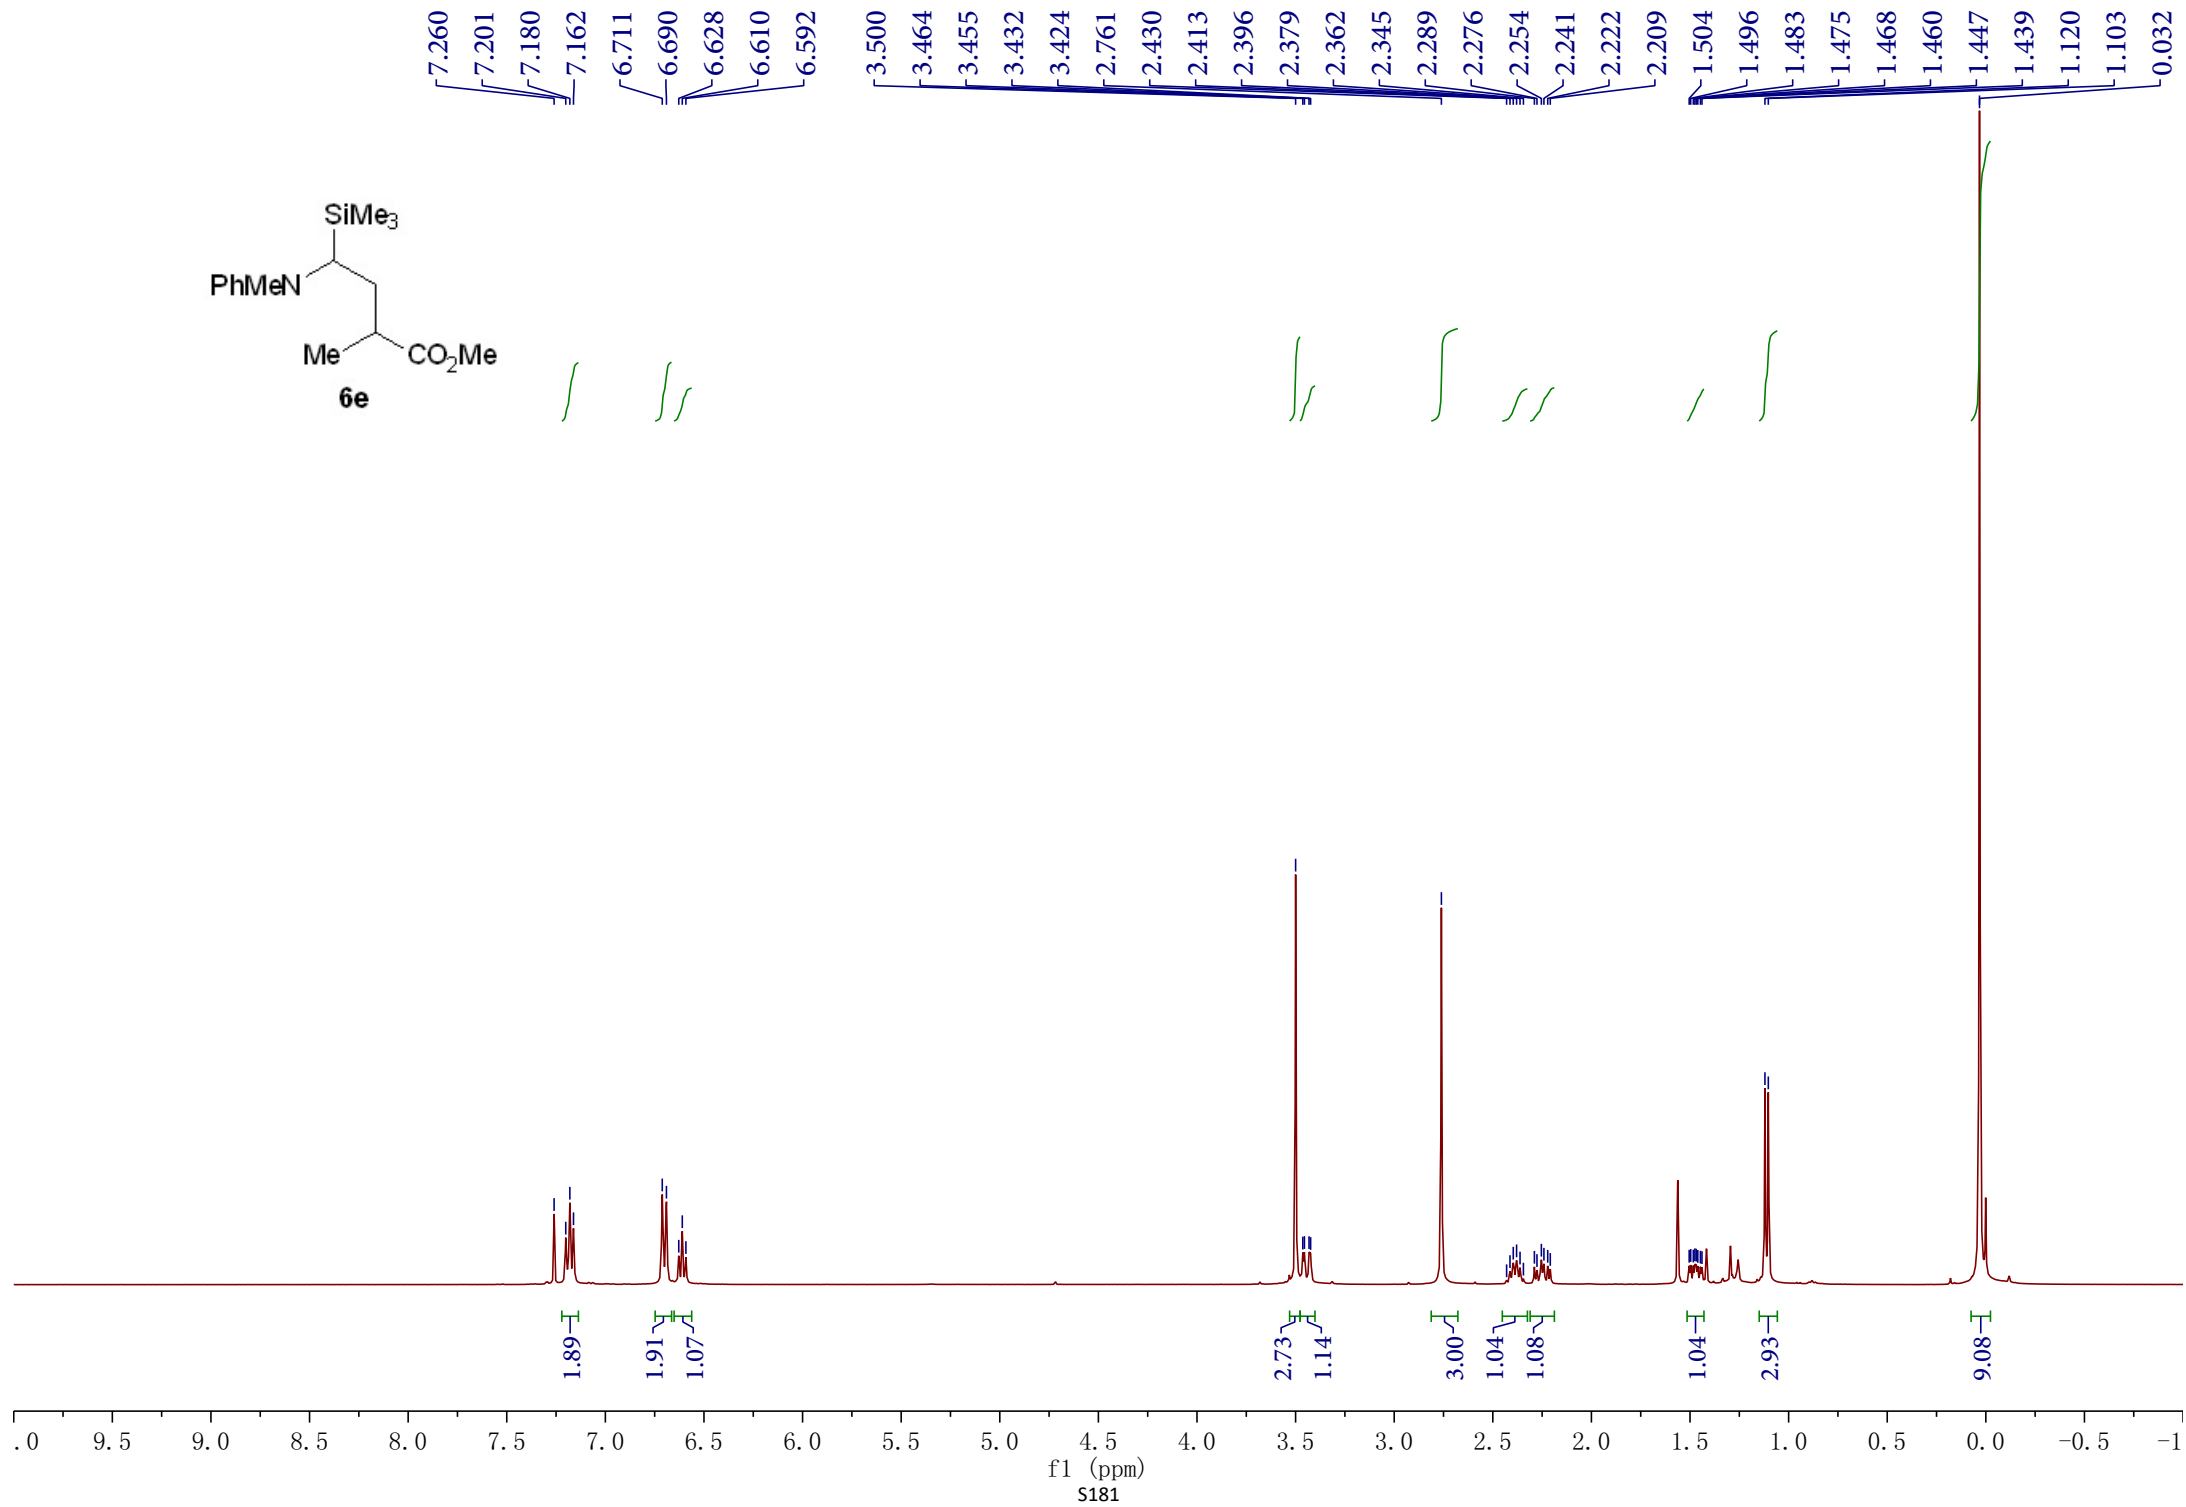

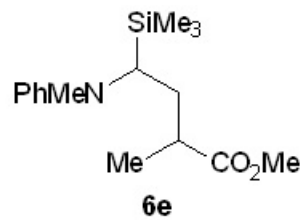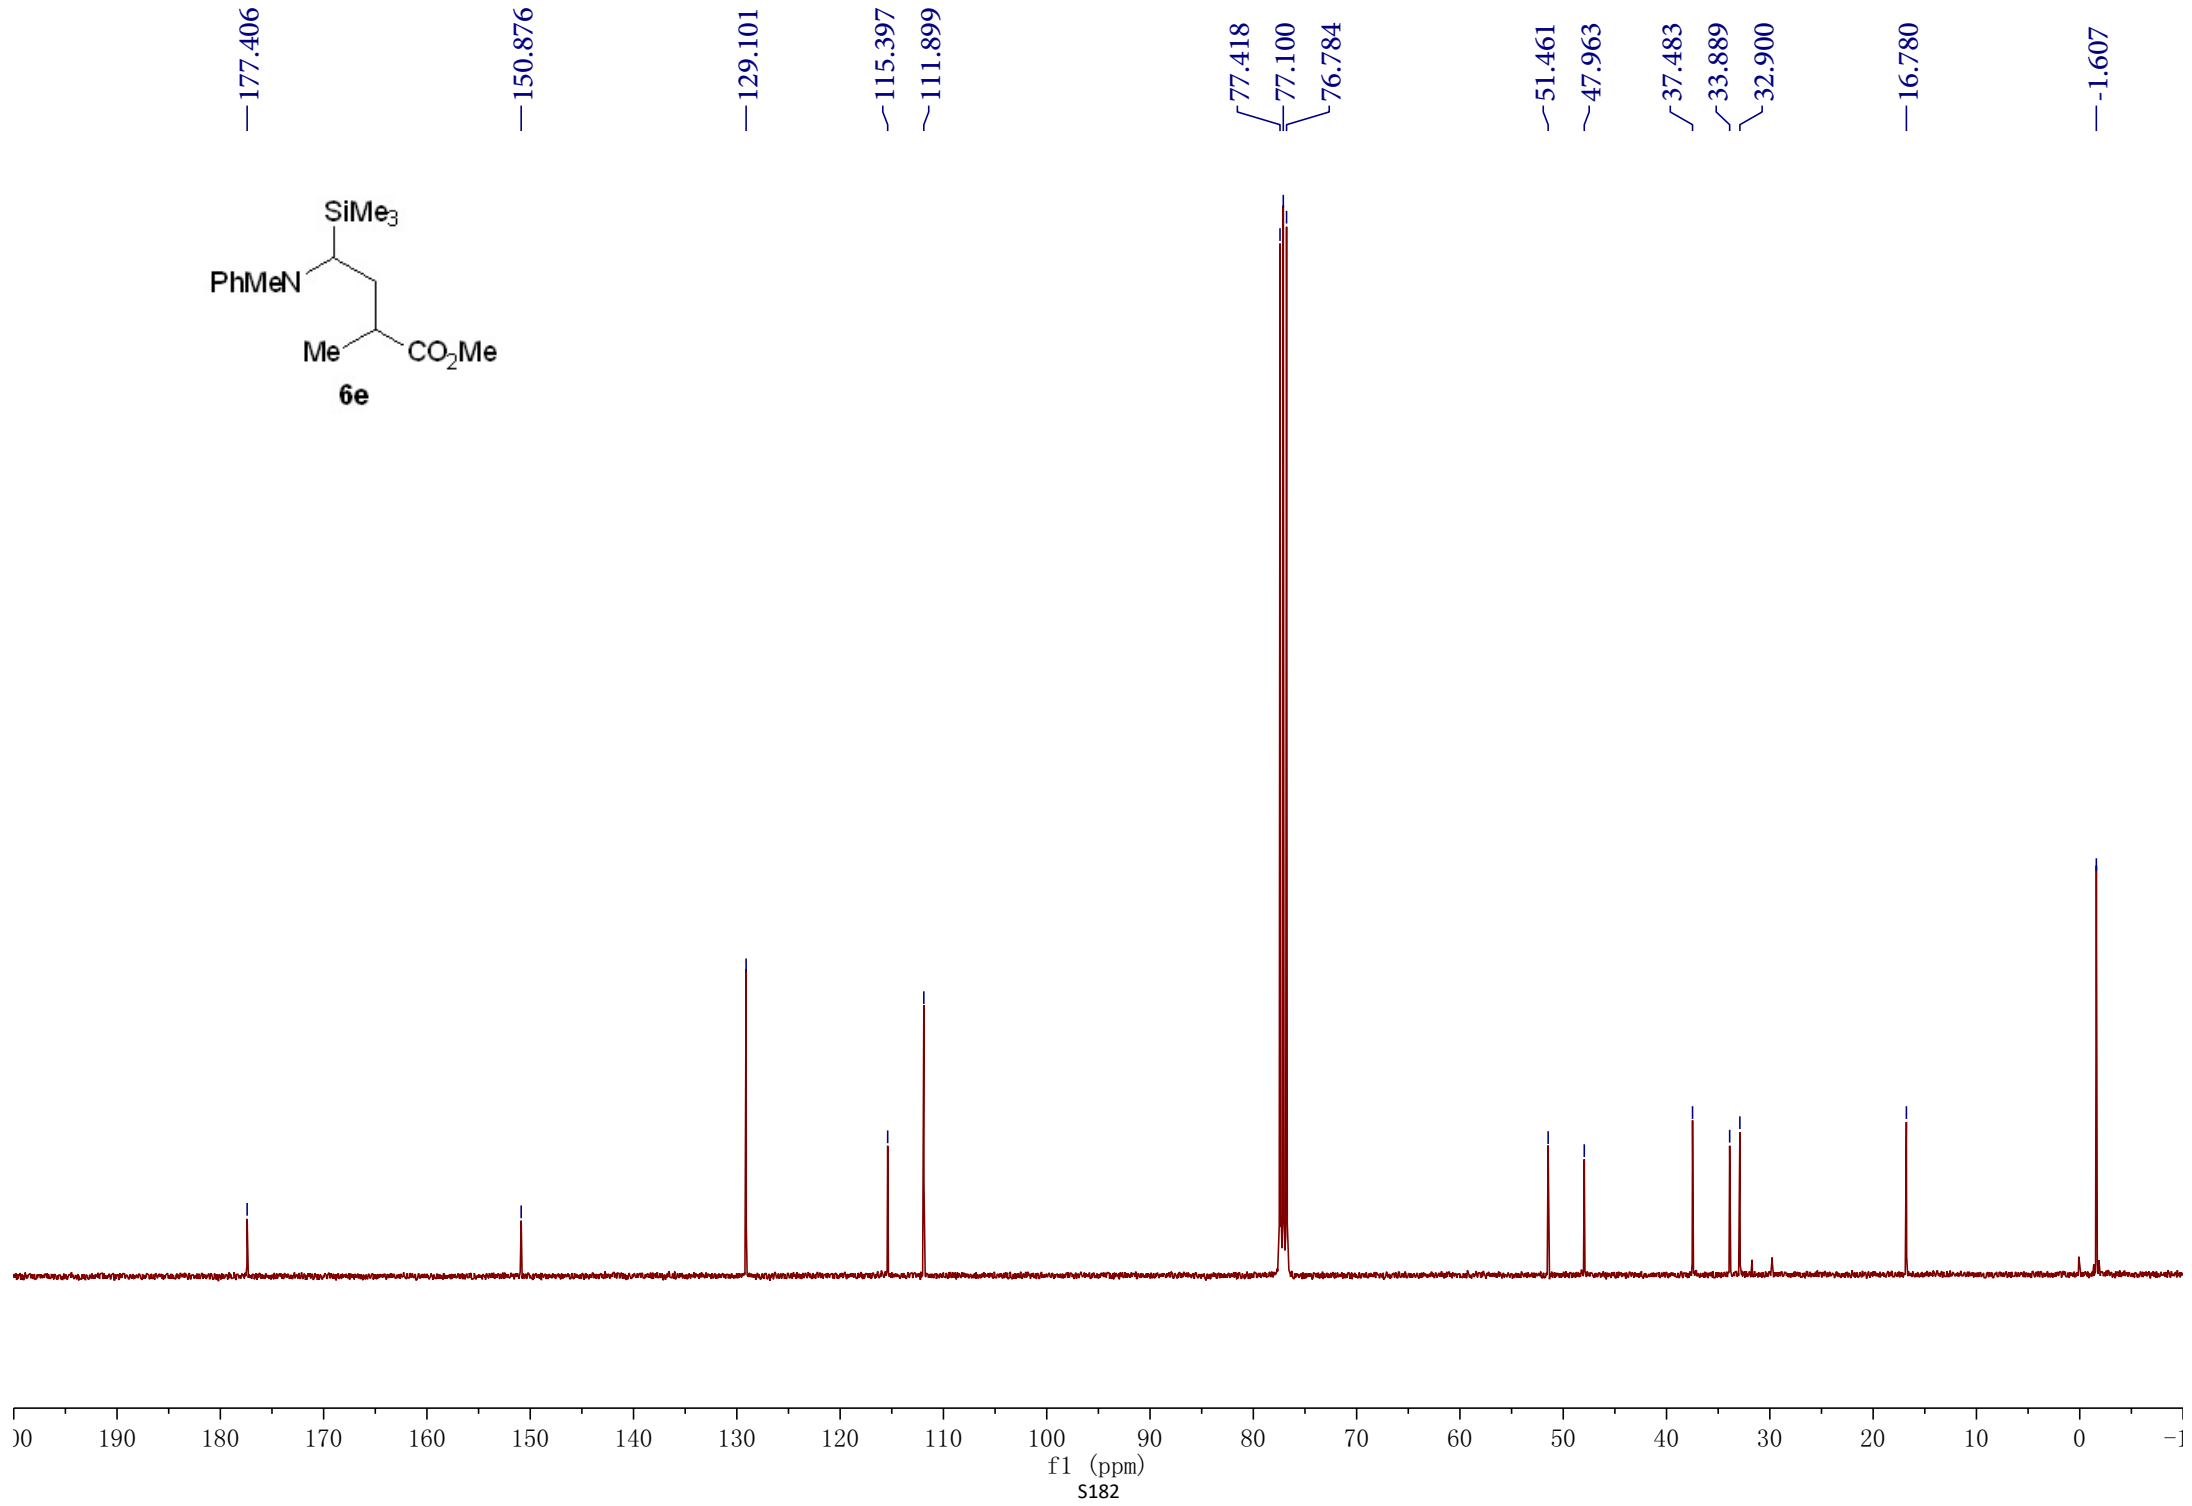

7.391 7.380 7.334 7.317 7.300 7.260 7.239 7.215 7.187 7.169 7.148 7.126 7.108  
 6.730 6.709 6.650 6.633 6.616 6.591 5.067 5.036 5.014 4.963 4.932 4.845 4.814  
 3.488 3.478 3.468 3.445 3.437 2.776 2.759 2.471 2.307 1.919  
 1.533 1.526 1.506 1.489 1.470 1.308 1.272 1.190 1.172 1.163 1.146

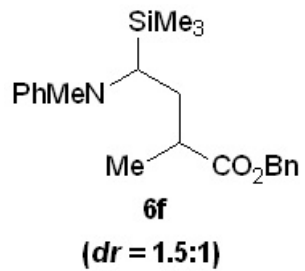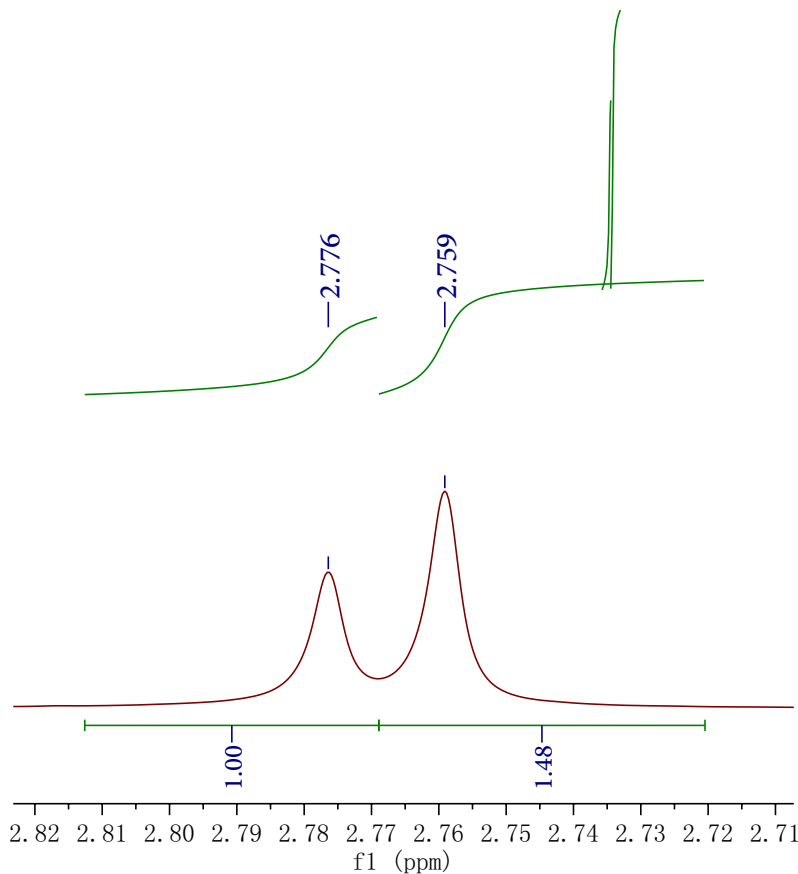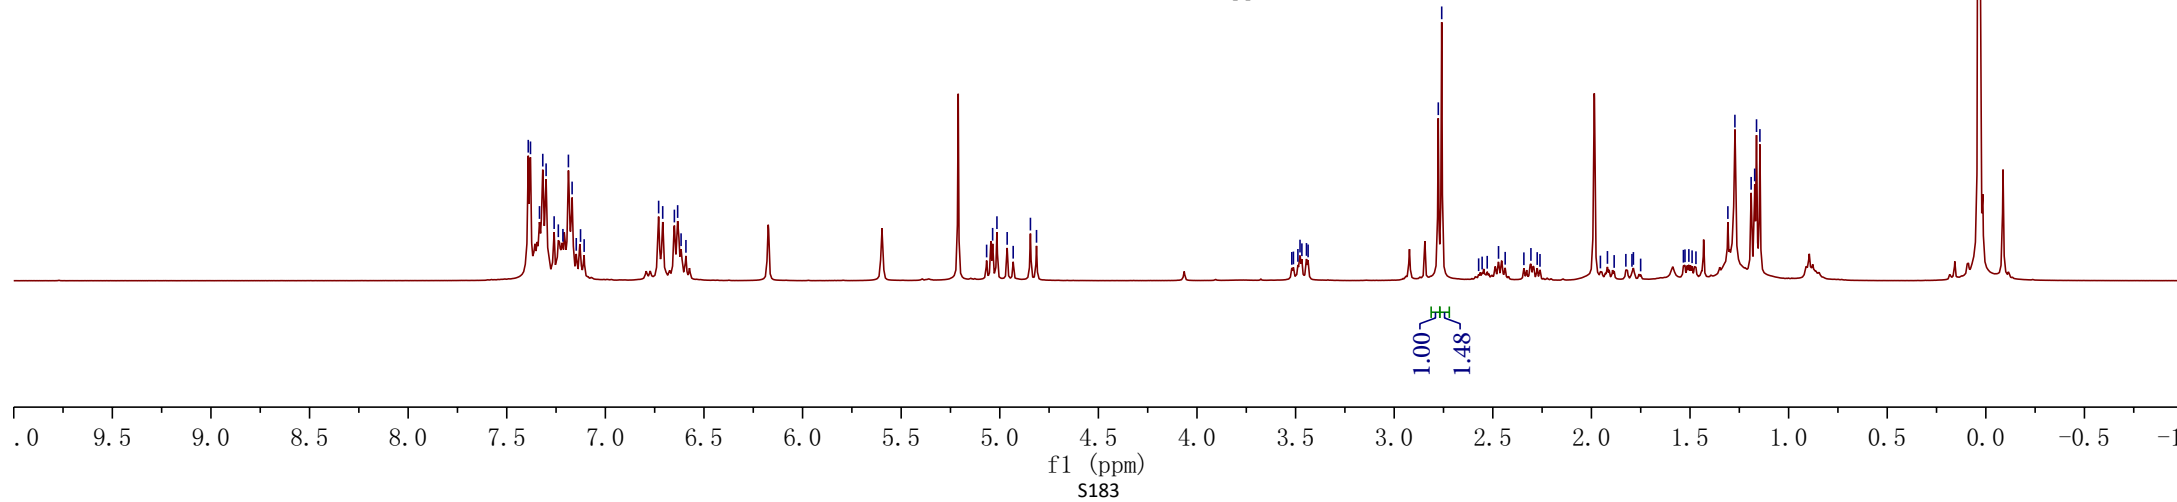

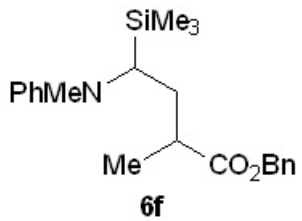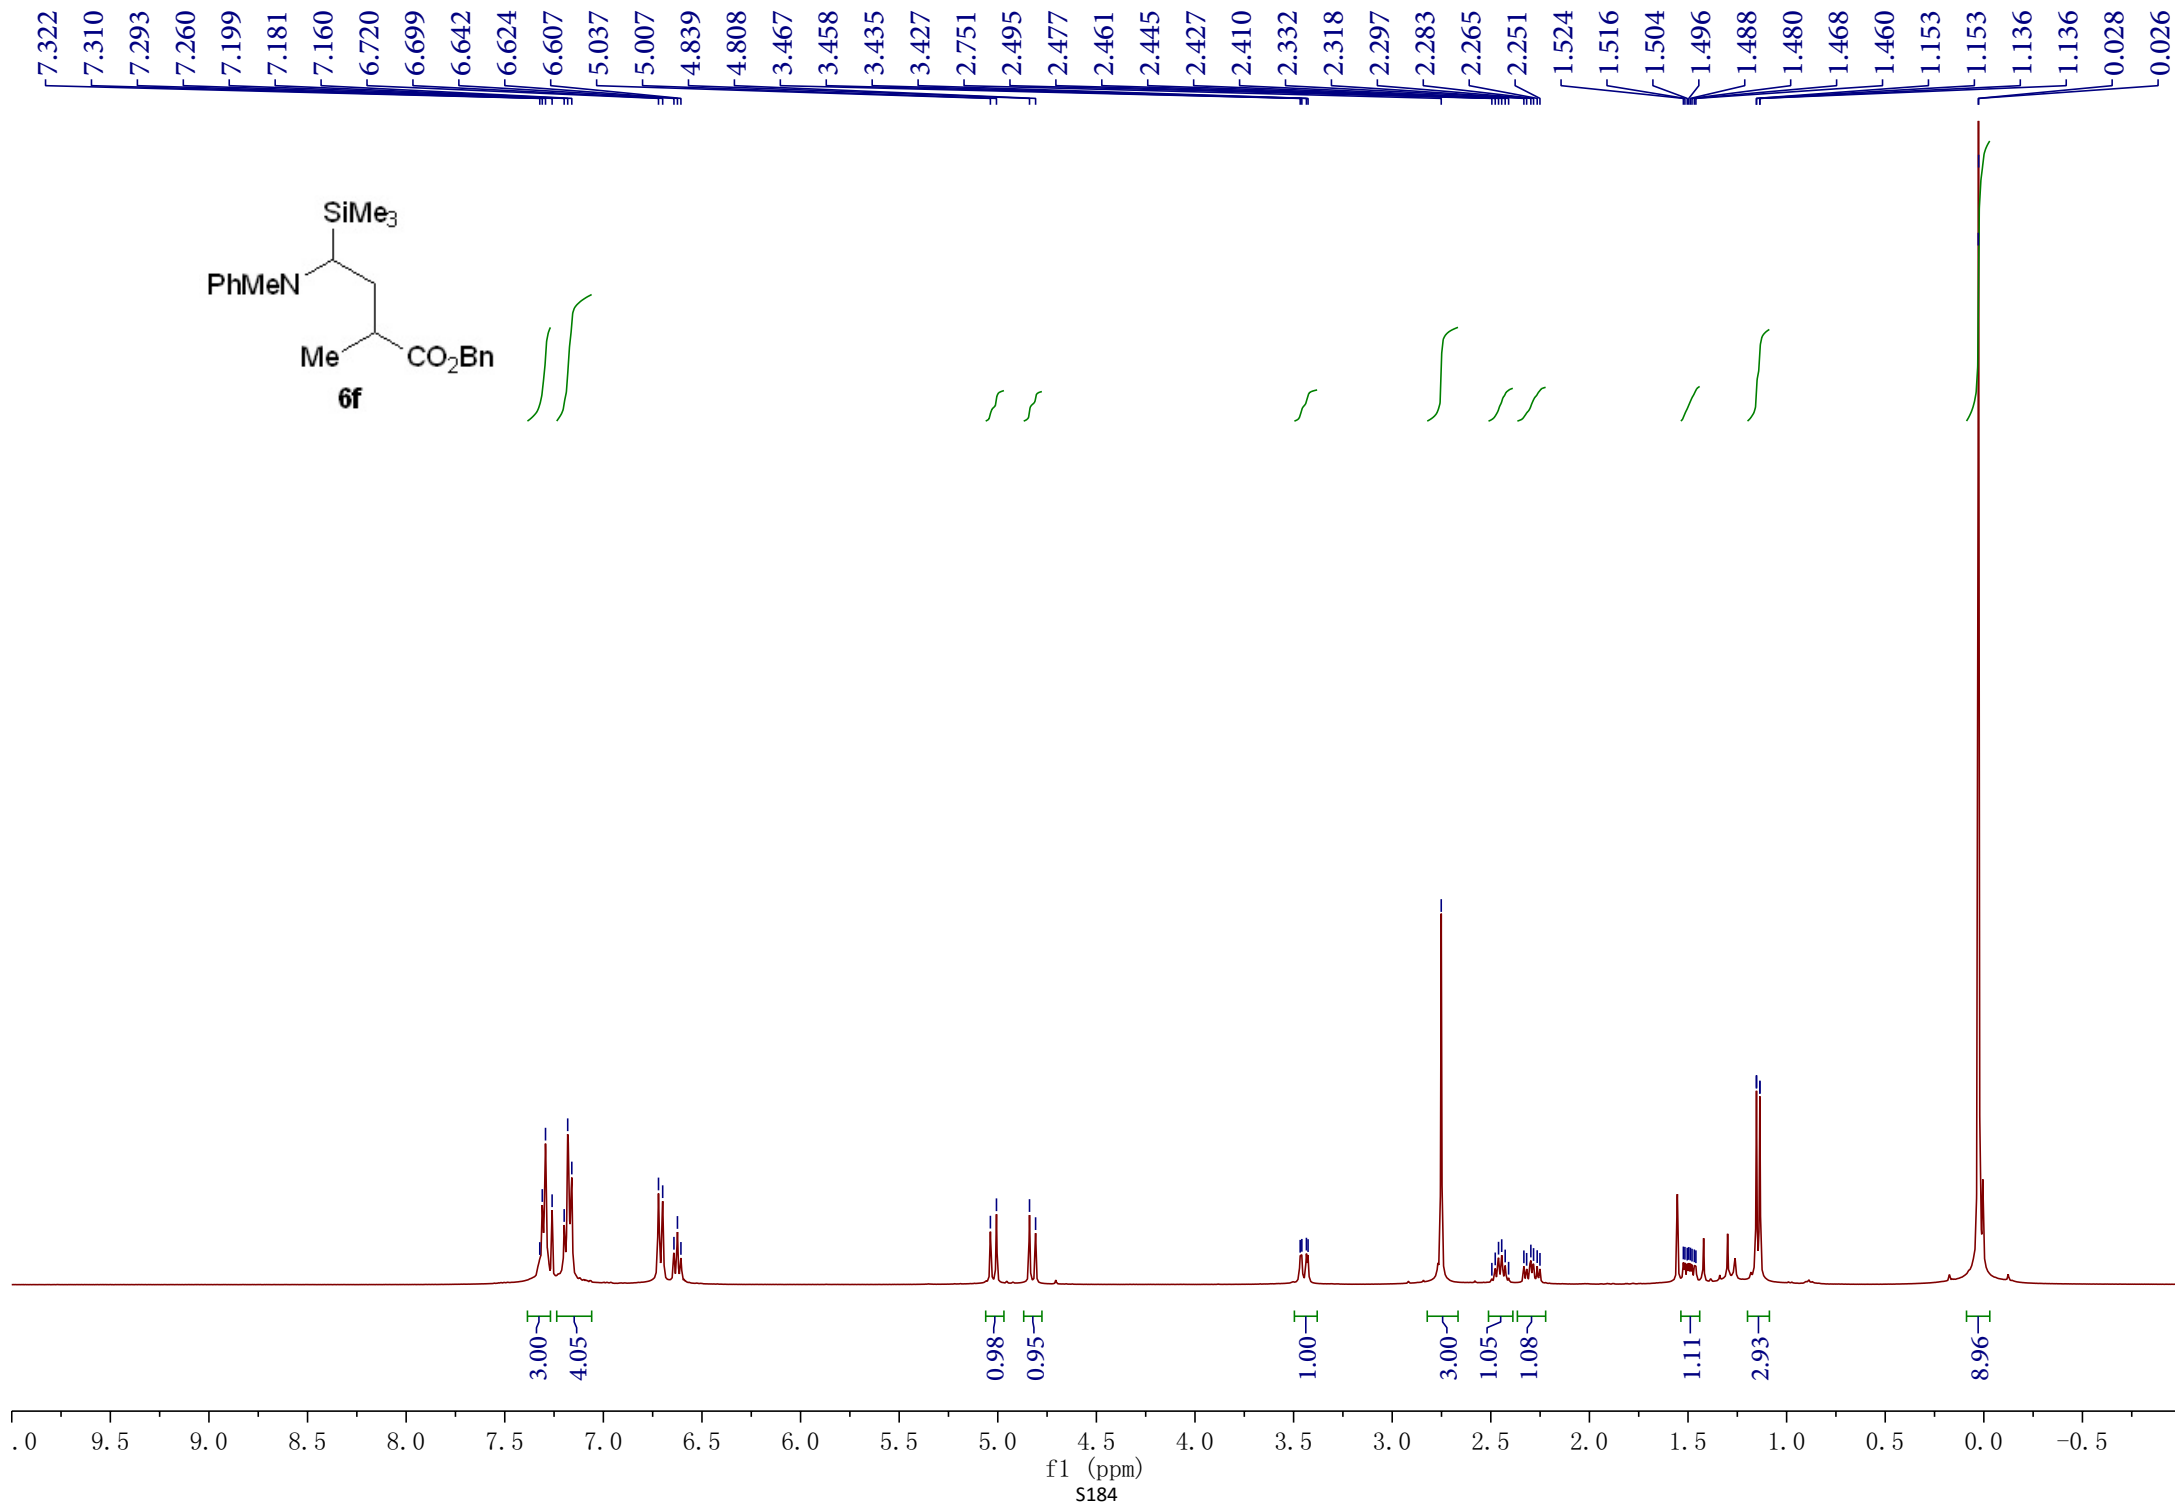



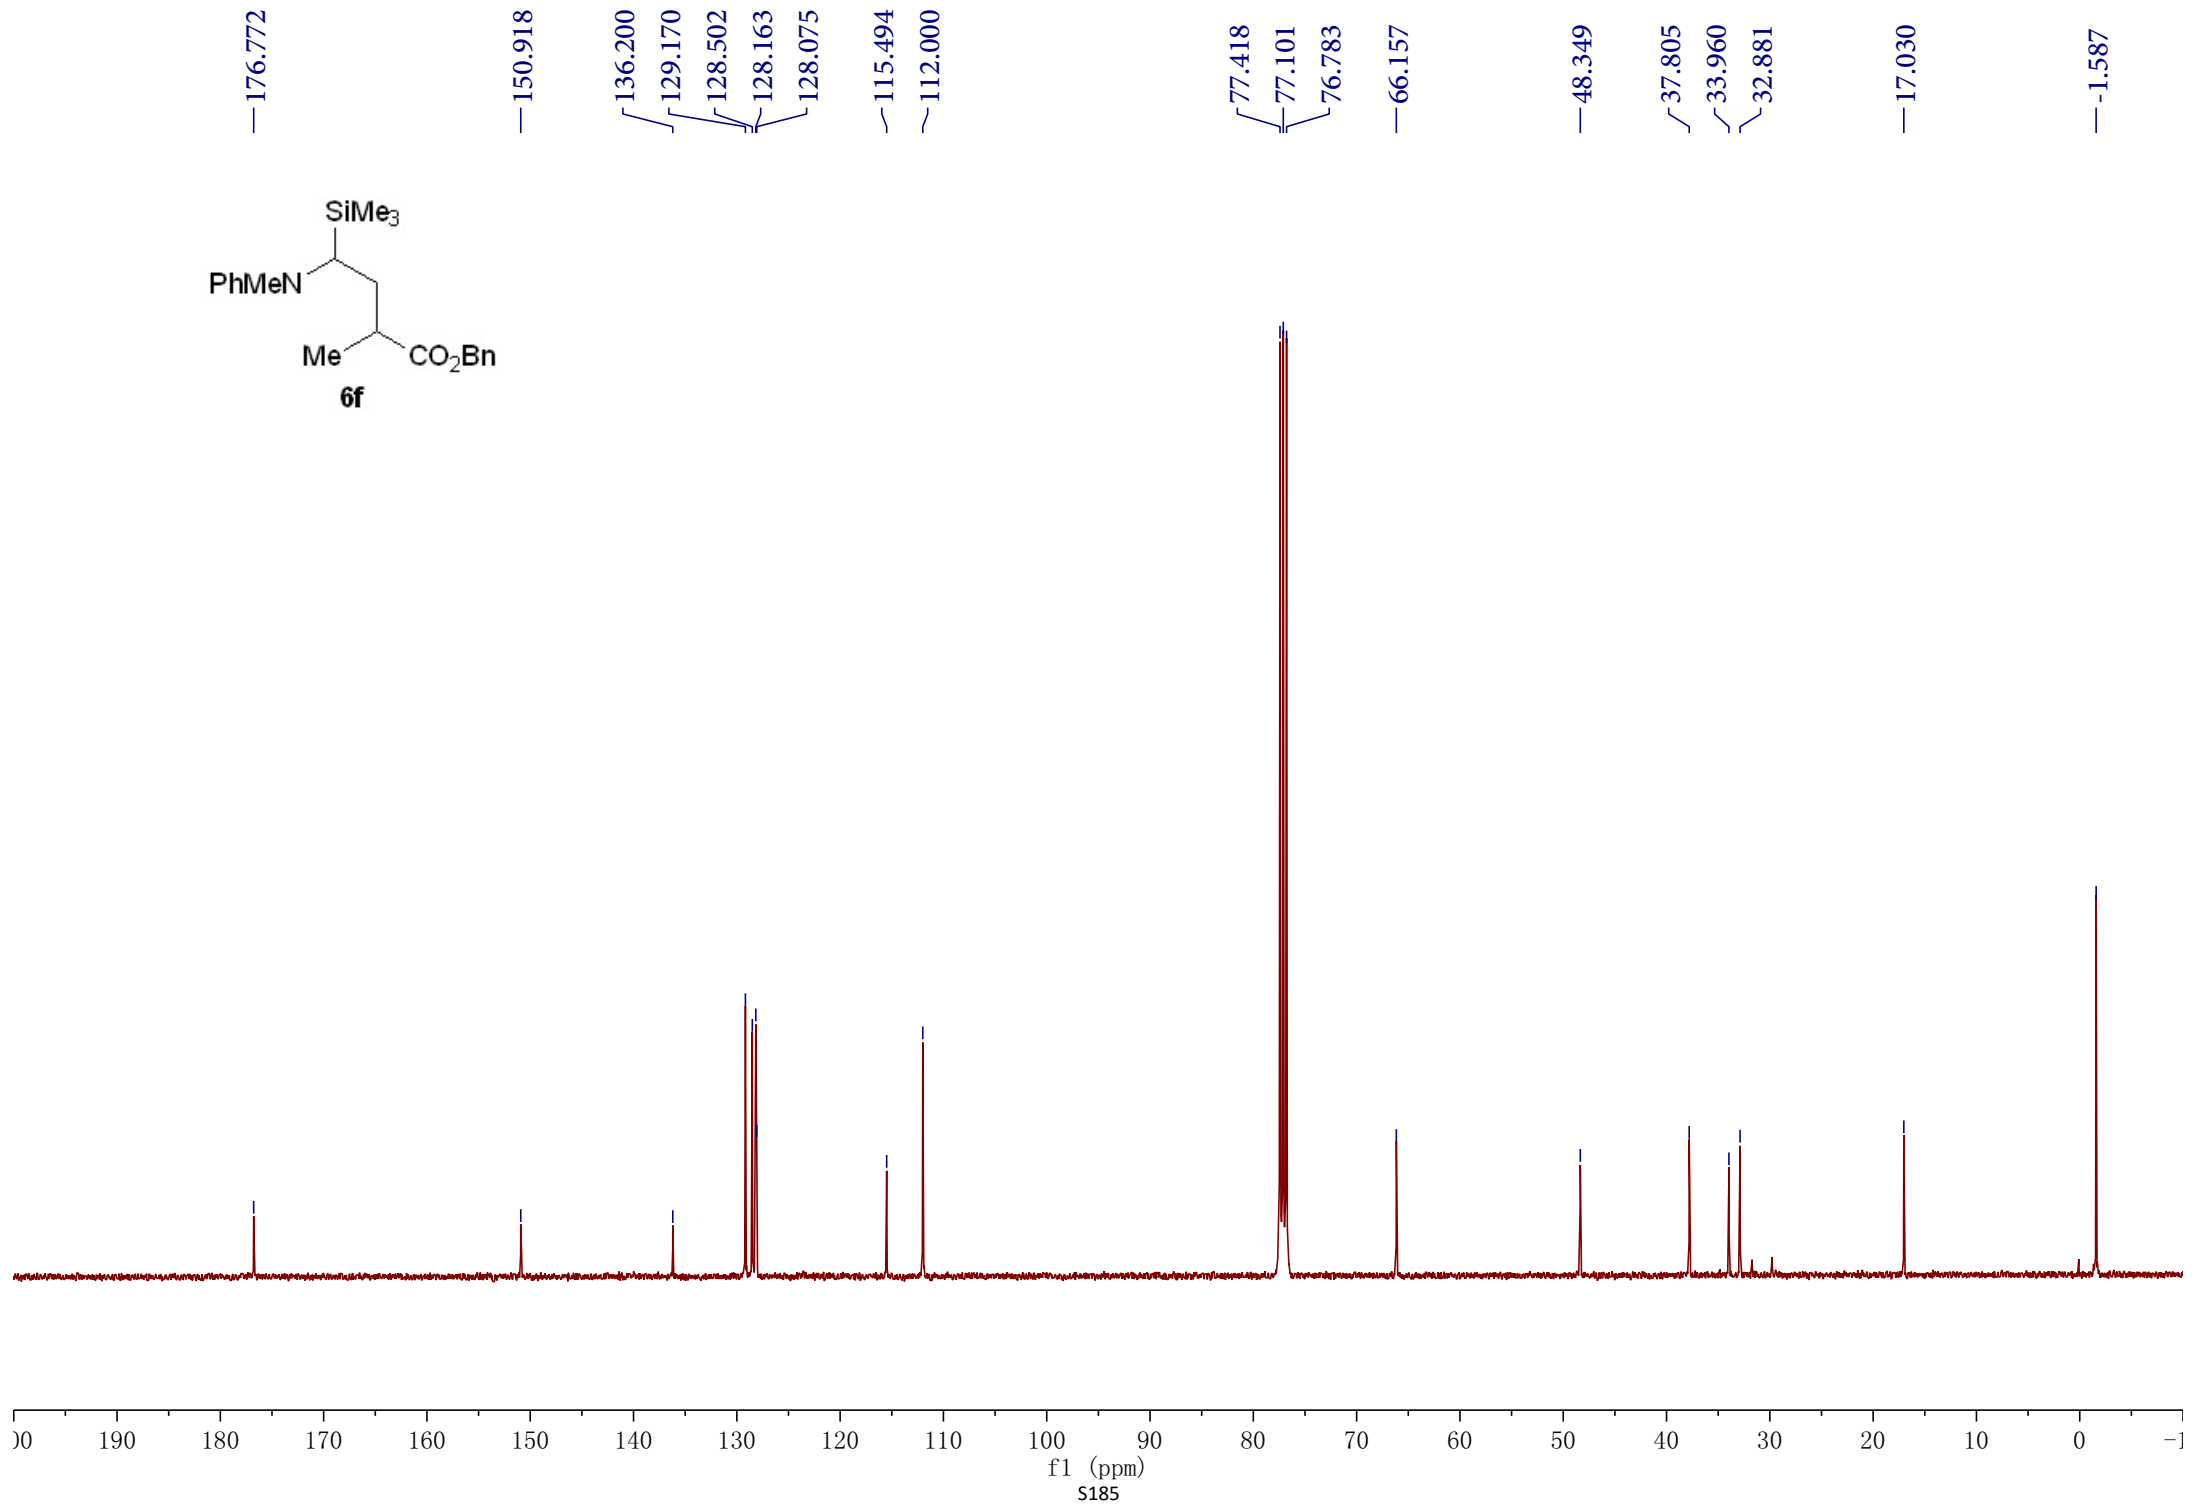

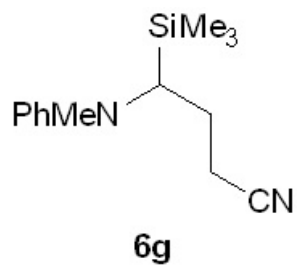

7.260  
7.237  
7.219  
7.215  
7.197  
6.769  
6.748  
6.691  
6.673  
6.654

3.447  
3.439  
3.416  
3.408  
2.806  
2.412  
2.392  
2.370  
2.338  
2.298  
2.278  
2.236  
2.145  
2.132  
2.113  
2.096  
2.077  
2.058  
2.046  
1.952  
1.932  
1.924  
1.912  
1.896  
1.888  
1.868  
0.068

1.83  
1.91  
0.97

1.04  
3.00  
2.10  
1.08  
1.03

8.92

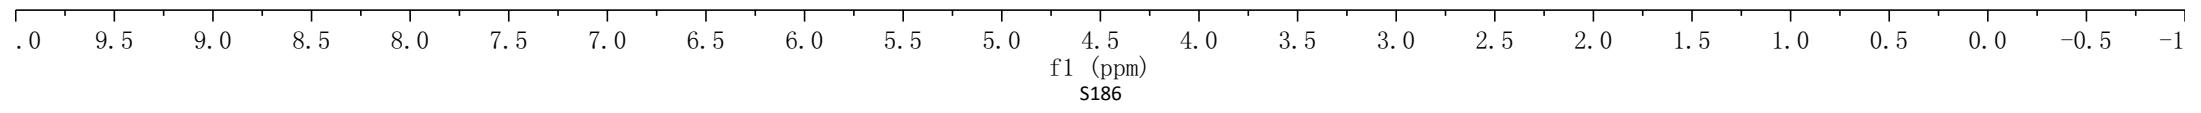



6g

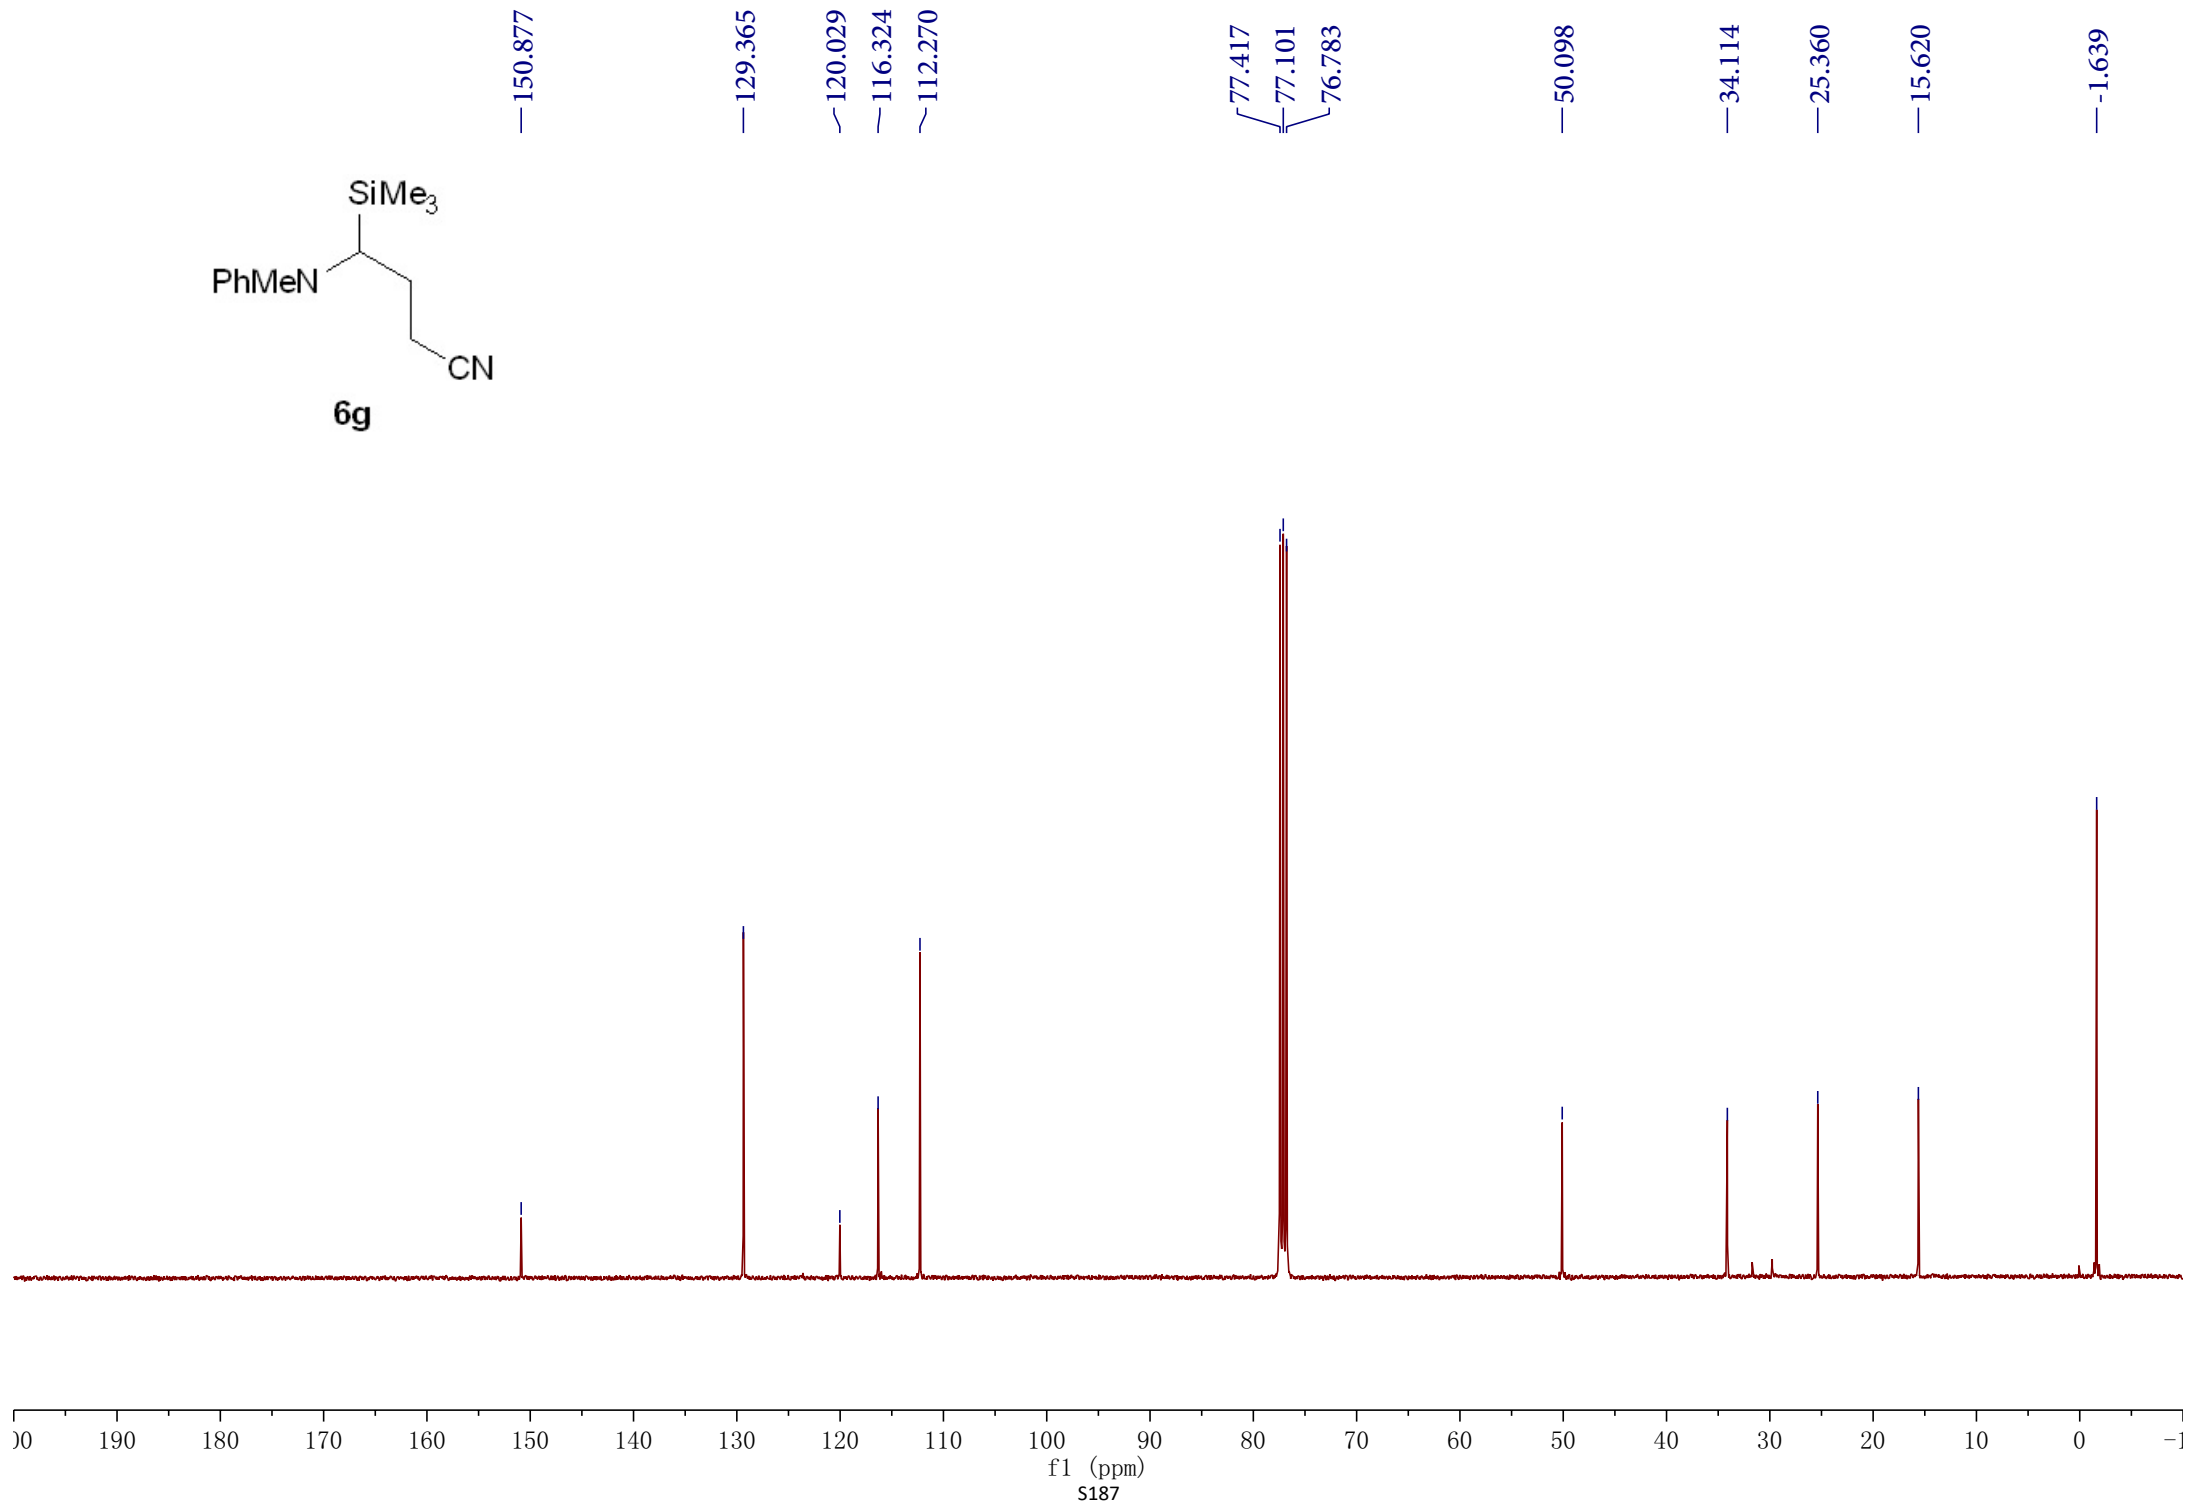

7.260 7.119 7.098 7.080 7.059 6.441 6.434 6.419 6.413 6.369 6.363 6.357 6.335 6.329 6.323 6.318 6.316 6.312 6.311 6.297 6.296 6.291 6.277 6.275 6.271 3.593 3.349 3.340 3.318 3.309 2.772 2.339 2.306 2.285 2.253 2.234 2.194 2.037 2.017 2.007 1.993 1.973 1.924 1.905 1.887 1.876 0.058

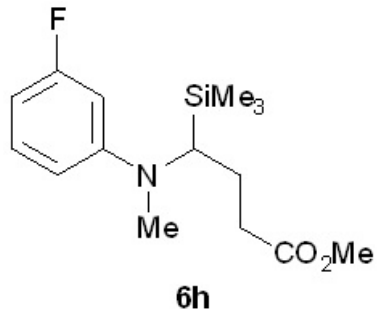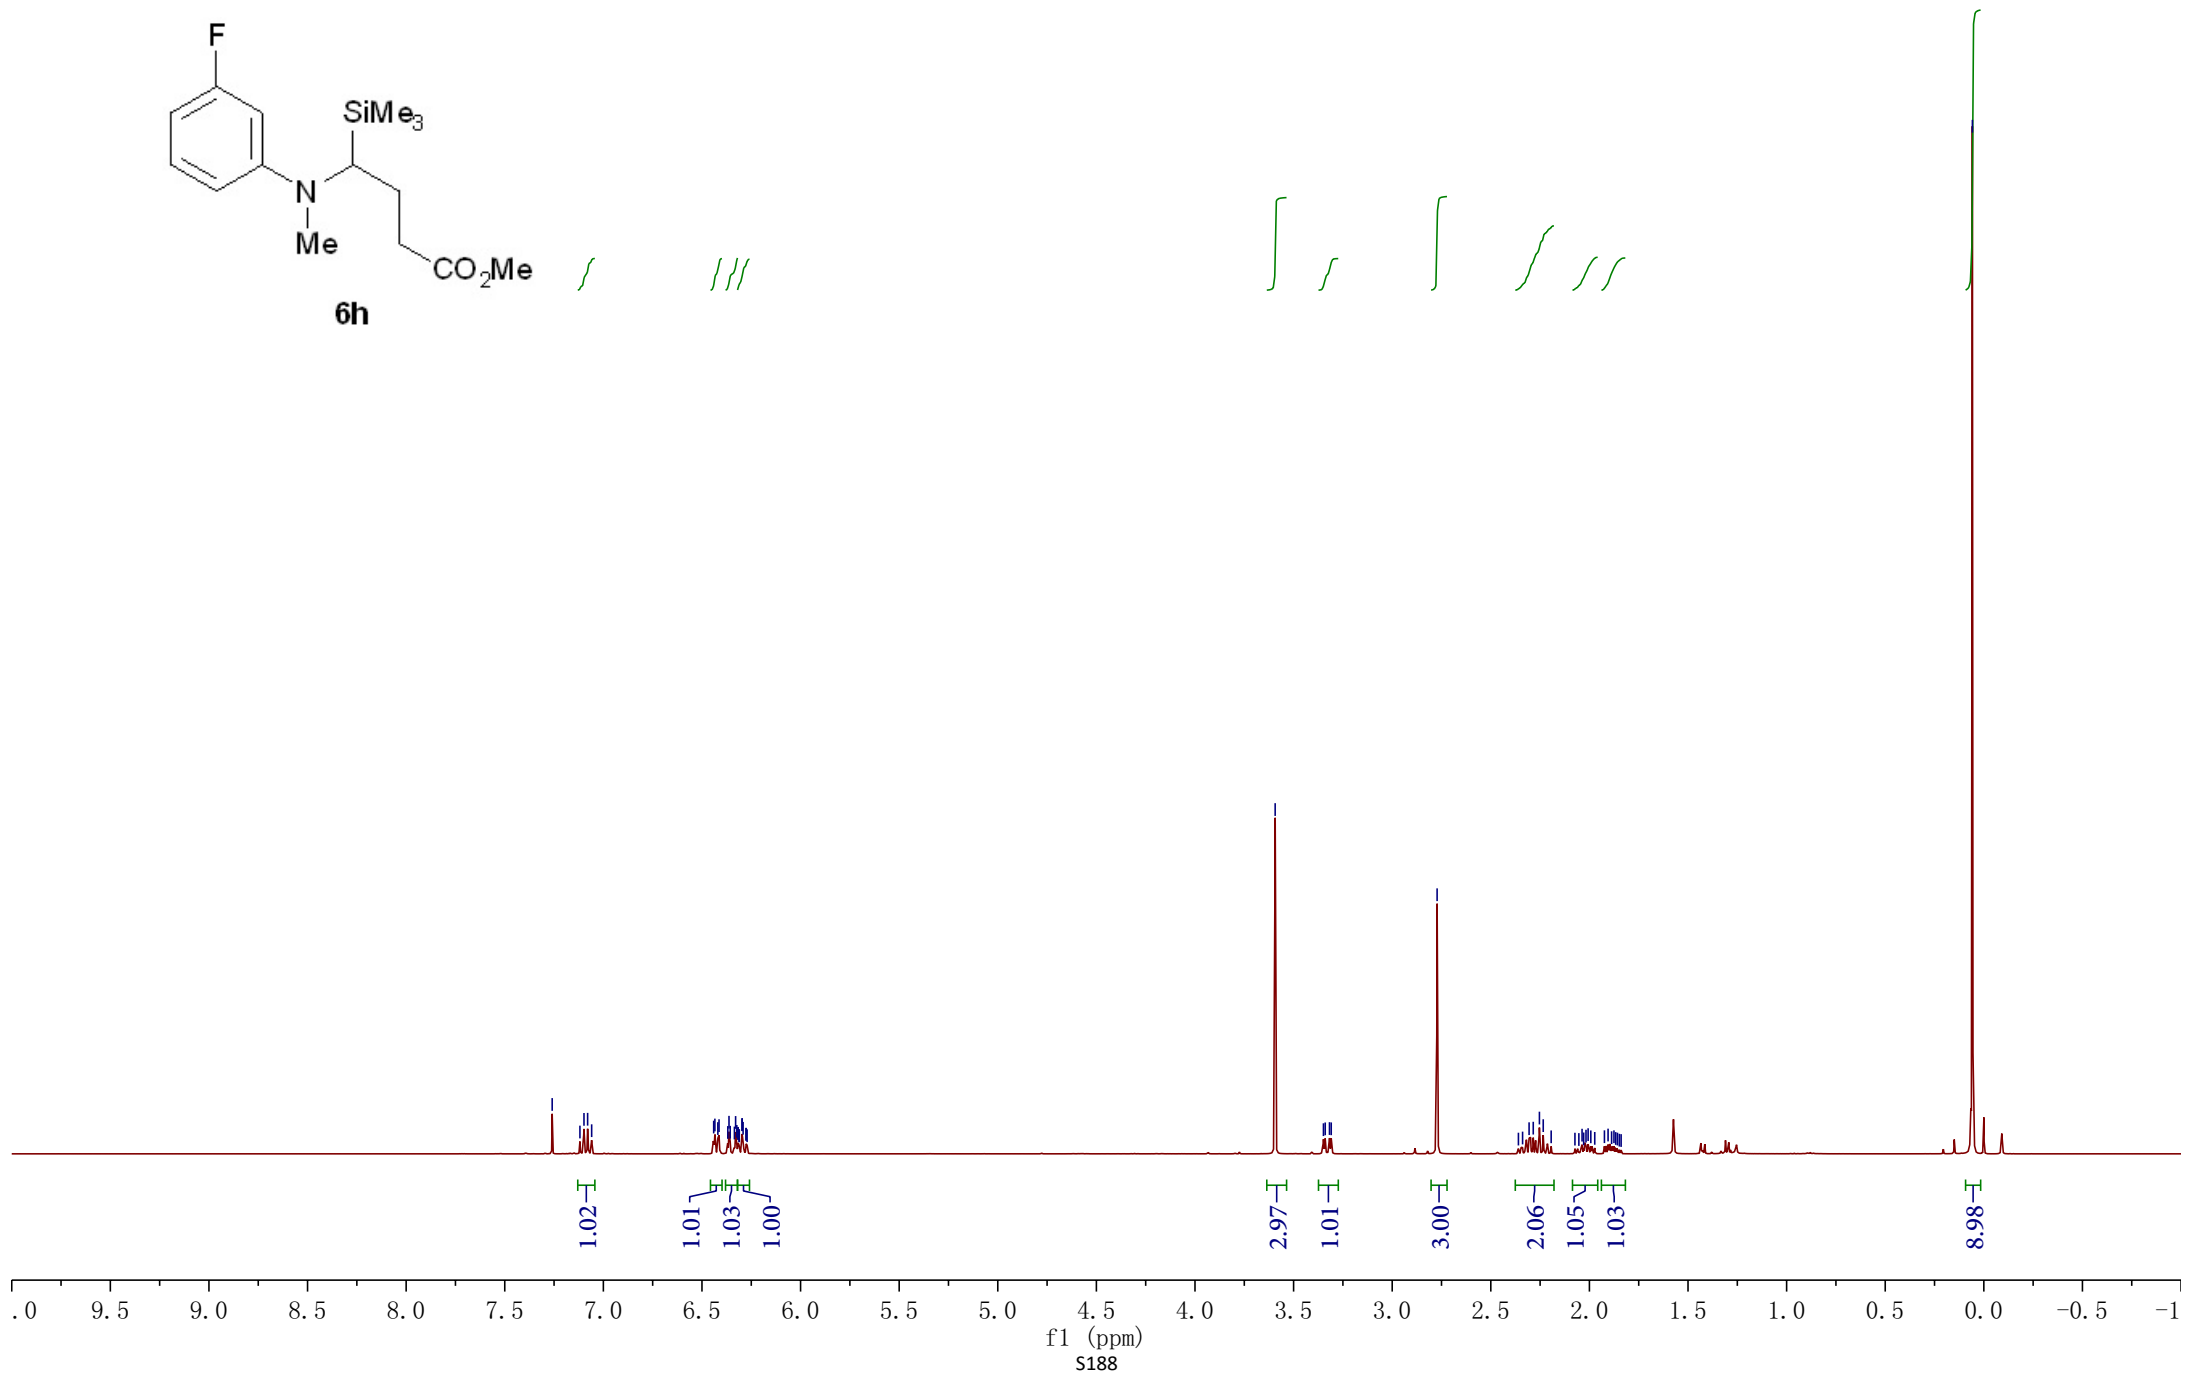

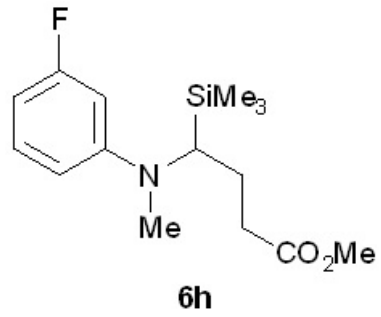

174.075  
165.503  
163.106  
152.878  
152.772

130.110  
130.005

107.357  
107.336  
101.895  
101.679  
98.720  
98.461

77.417  
77.101  
76.783

51.564  
50.203

34.158  
32.133  
23.924

-1.751

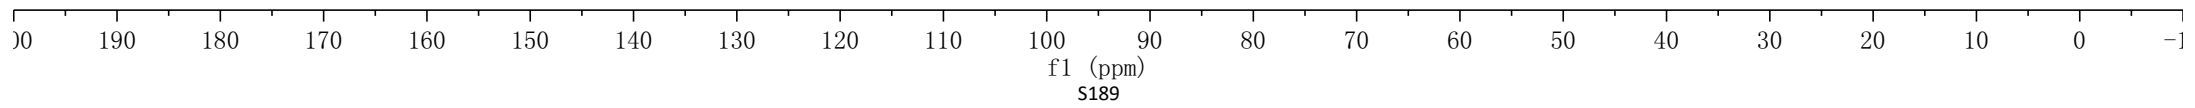

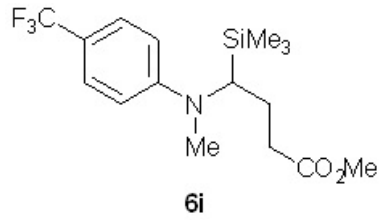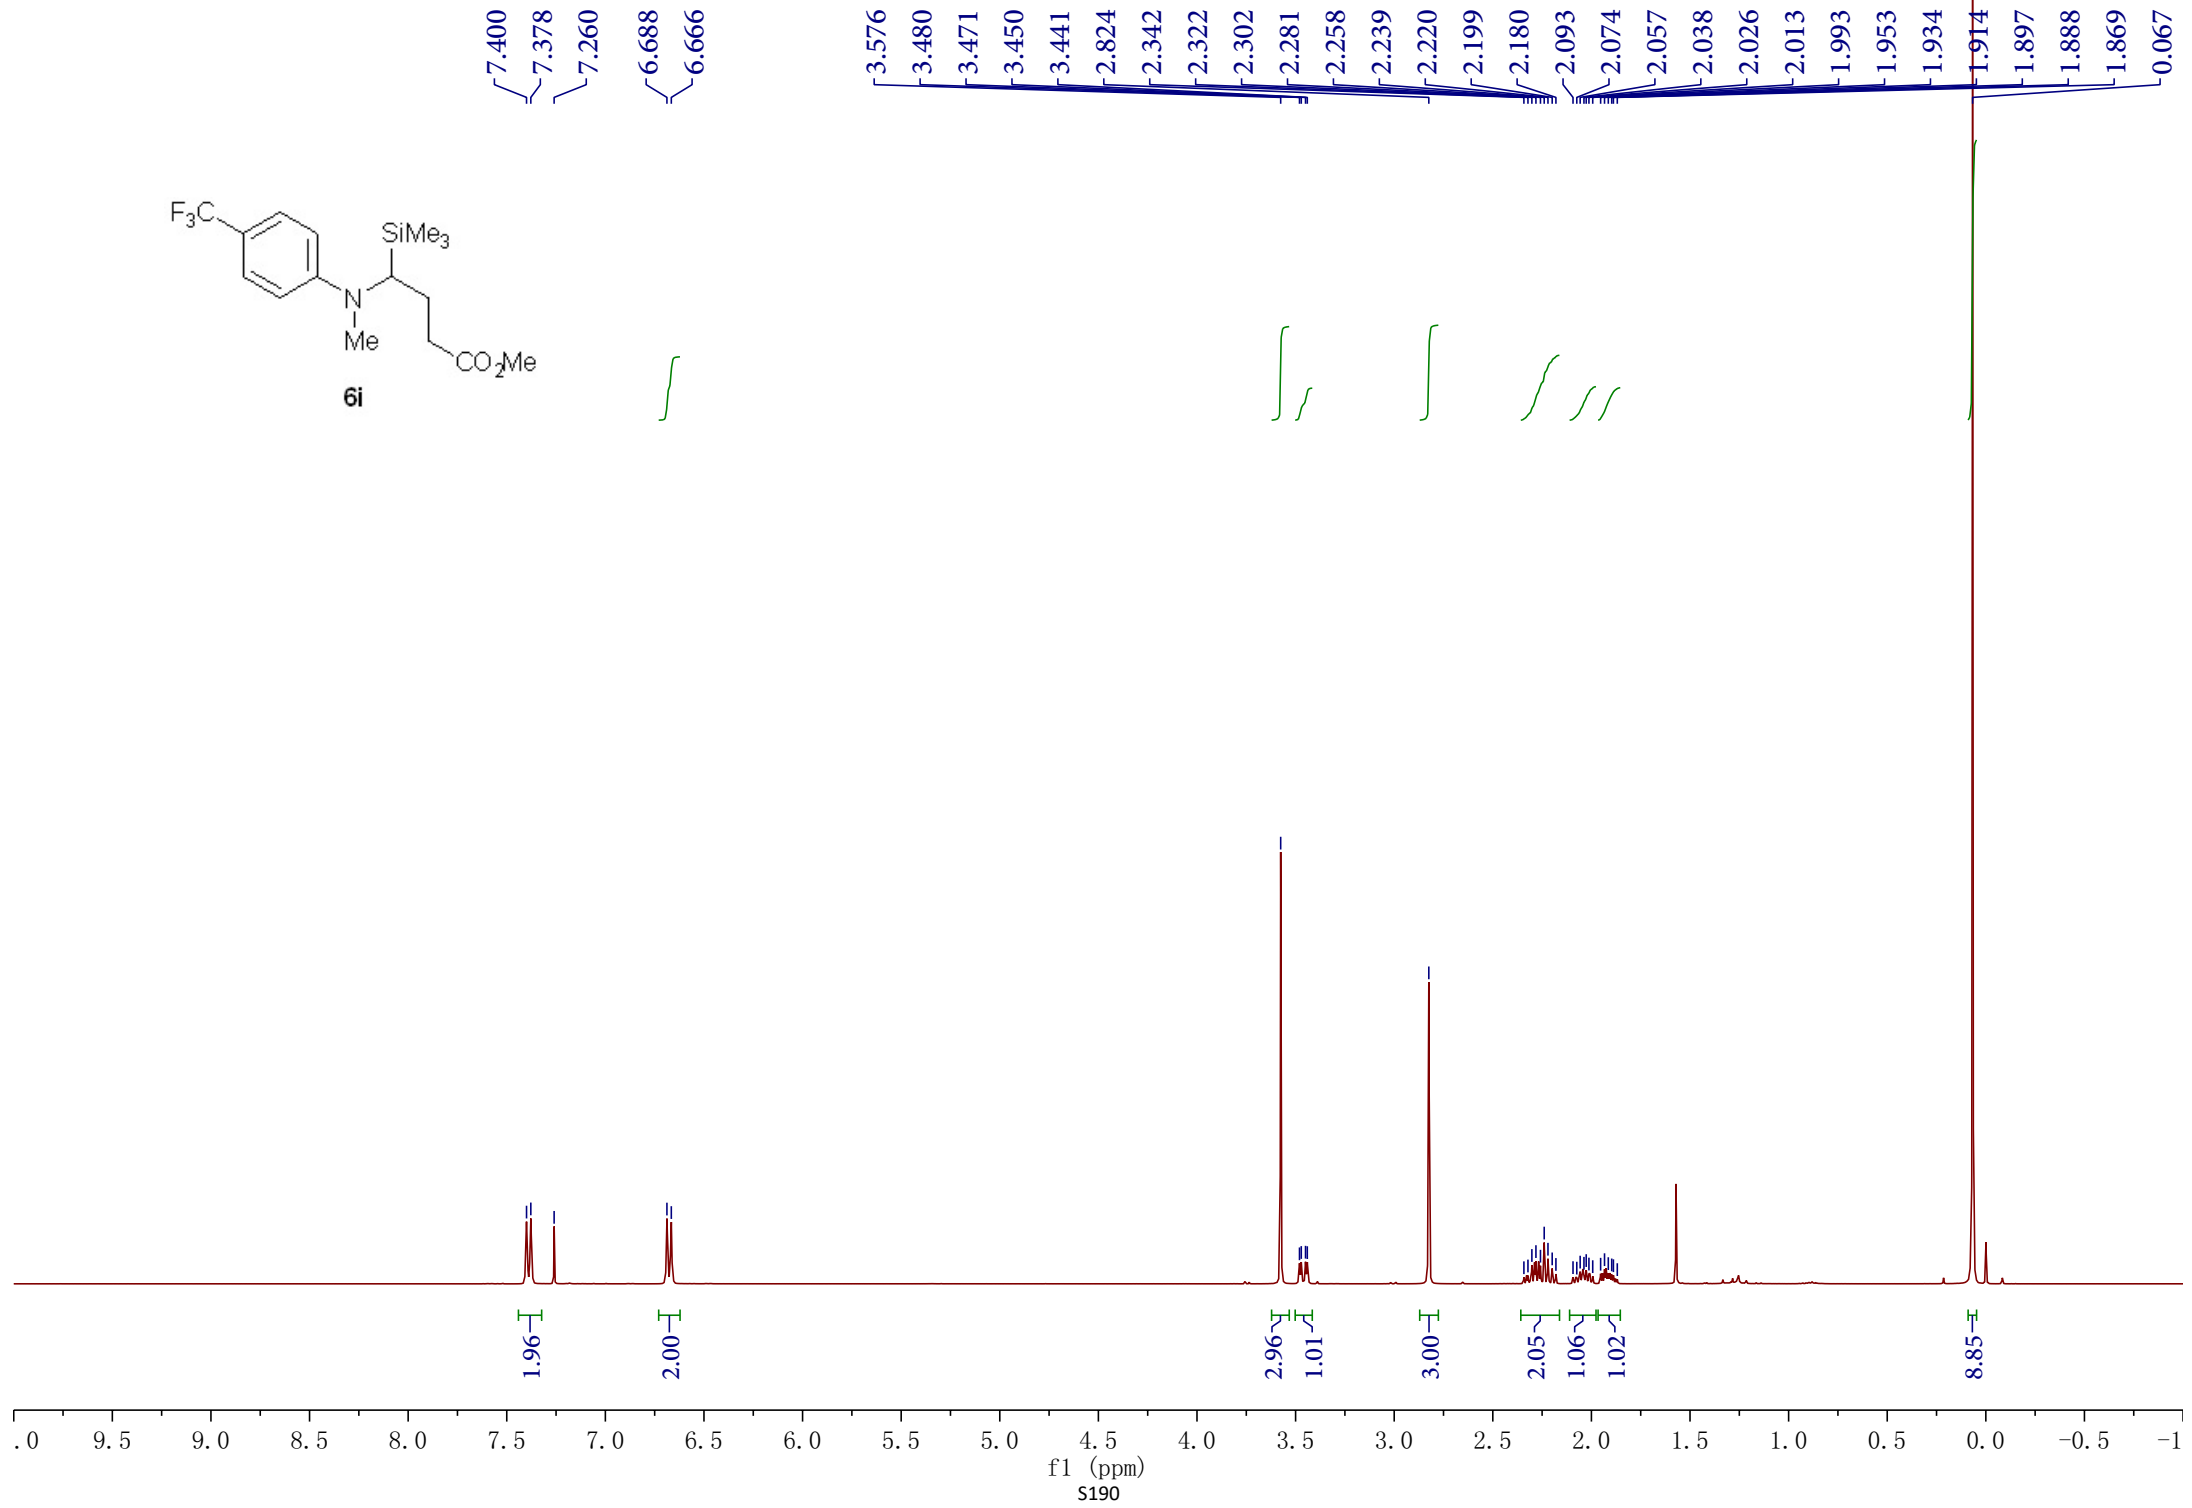

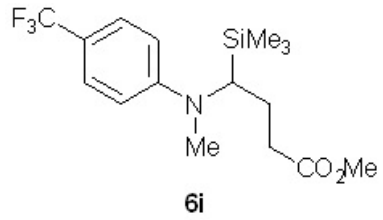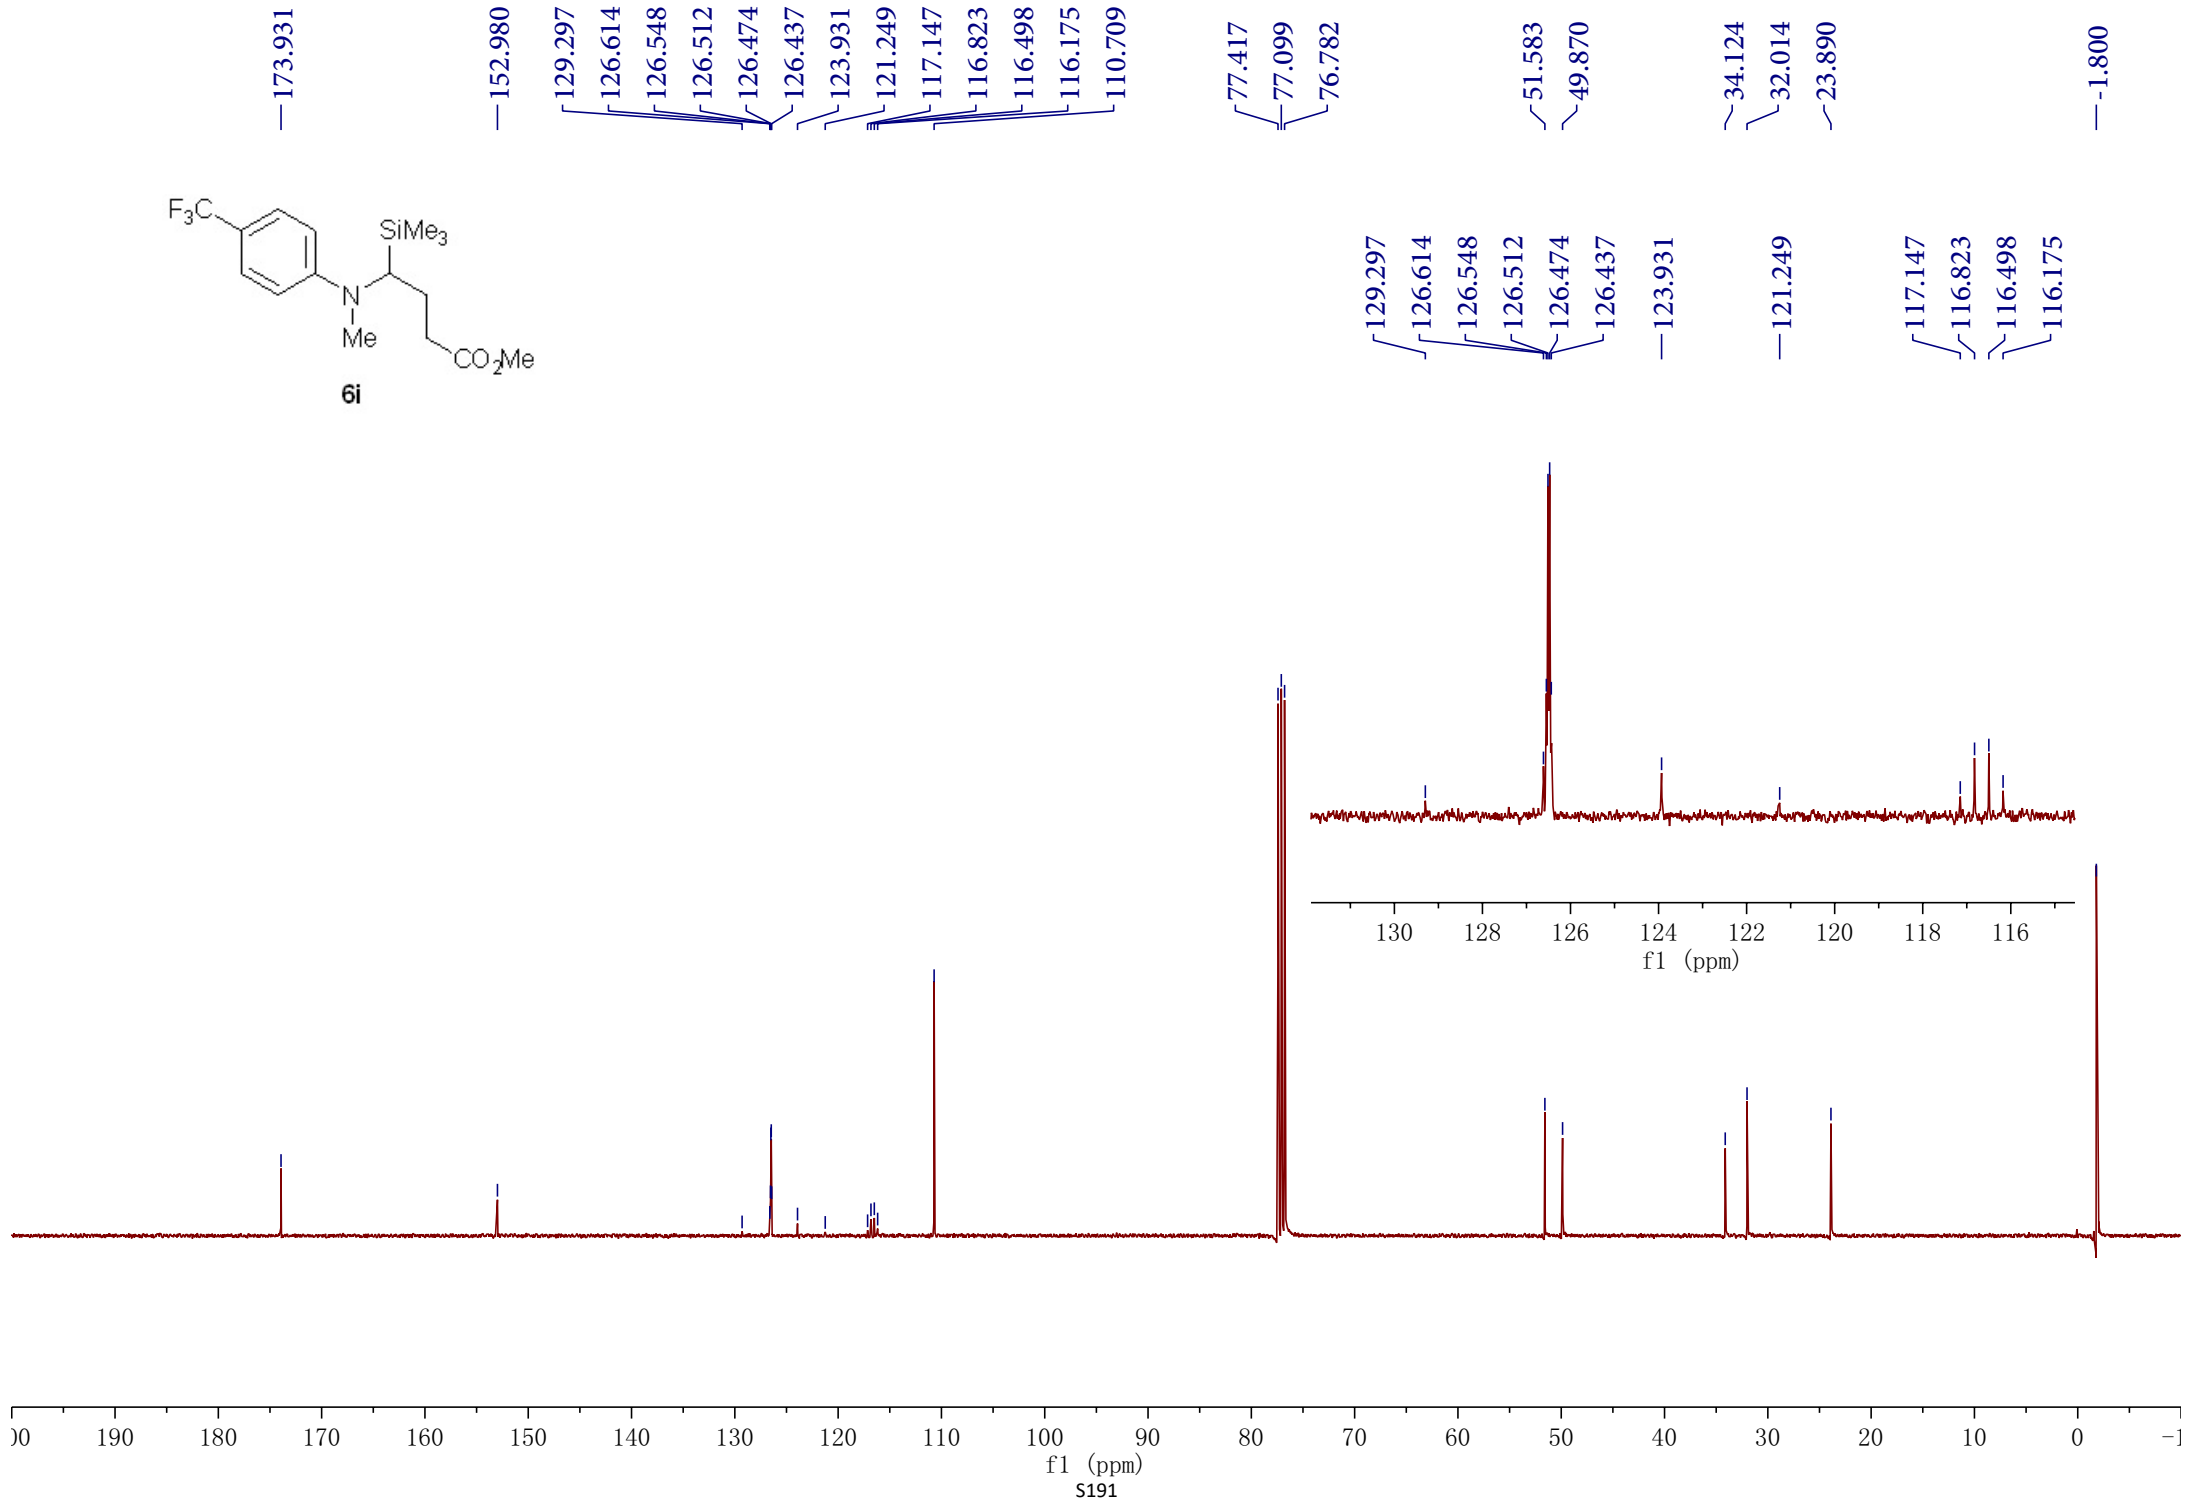

7.260 7.222 7.200 7.181 7.175 7.157 6.683 6.662 6.652 6.650 6.636 6.629 6.619 6.616 6.601 6.597 6.579  
 3.268 3.254 3.242 3.229 2.849 2.819 2.511 2.502 2.473 2.468 2.388 2.348 2.286 2.254 2.178 2.146 2.114 2.016 1.977 1.967 1.947 1.911 1.876 1.694 1.672 1.537 1.436 1.417 0.113 0.104

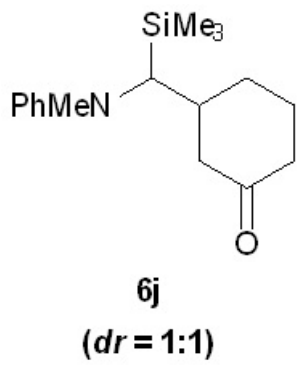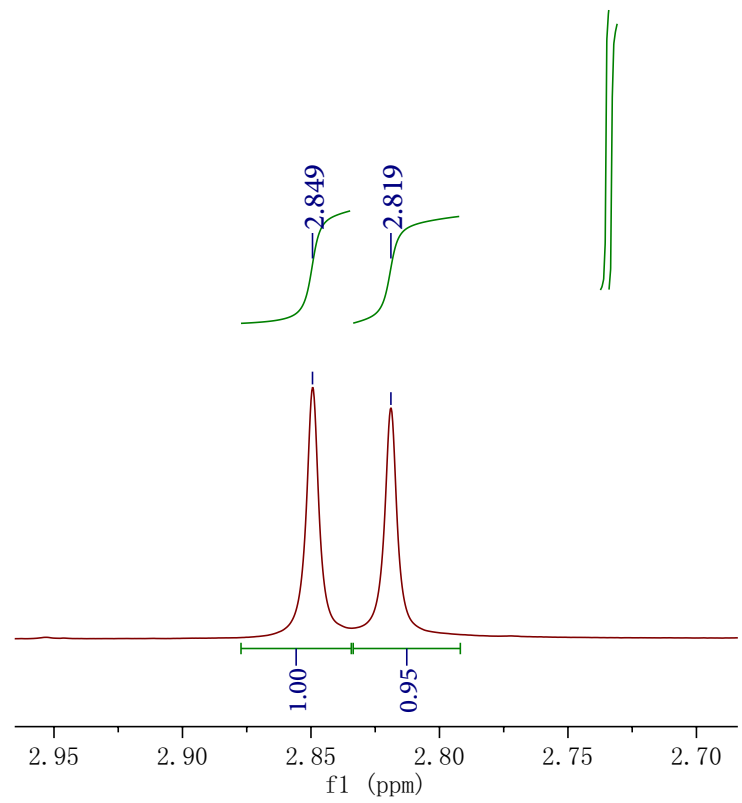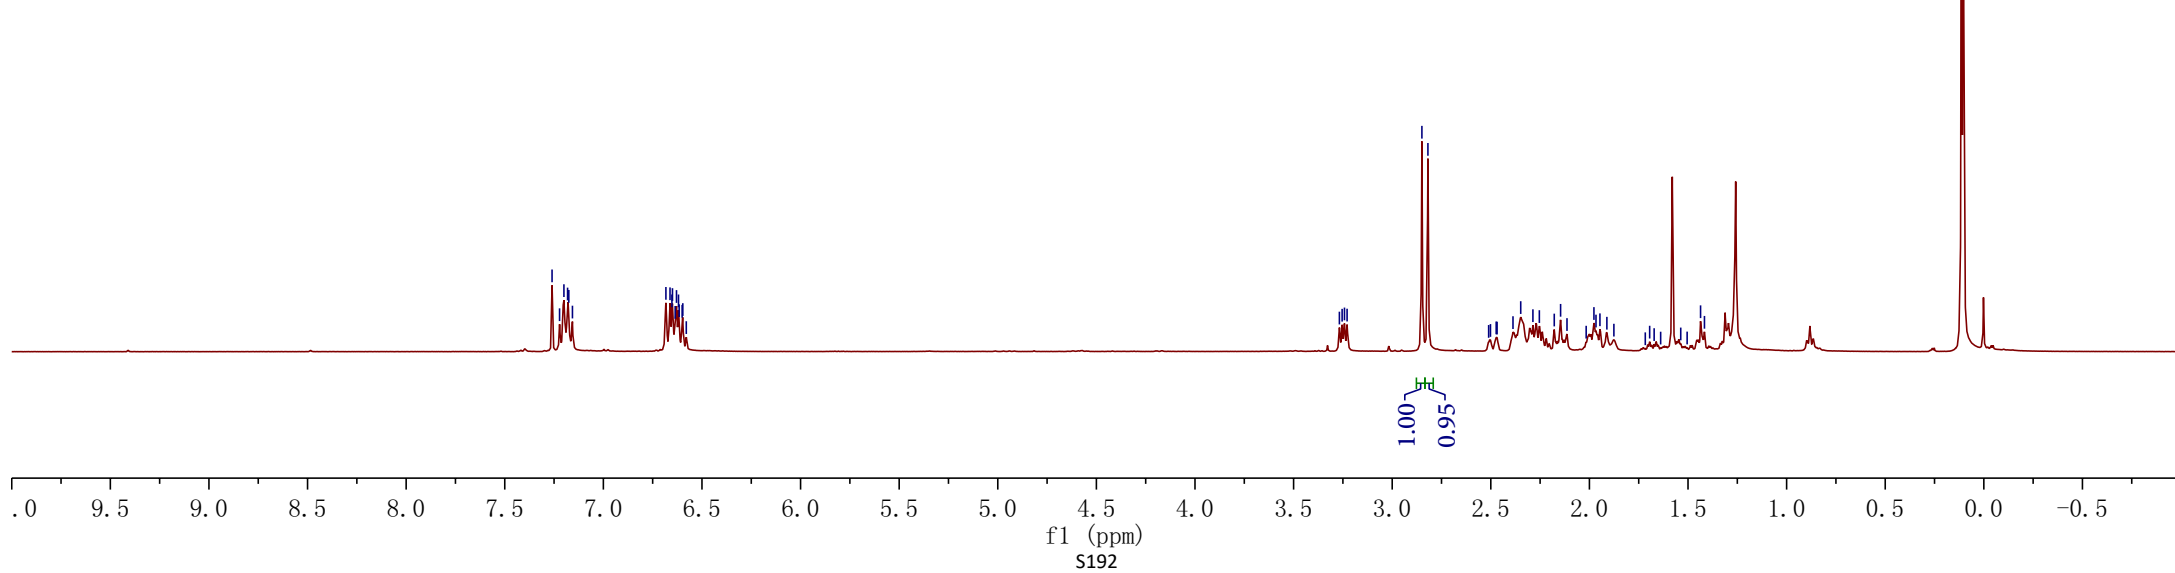



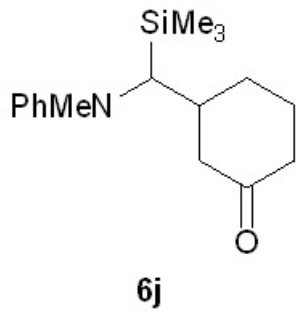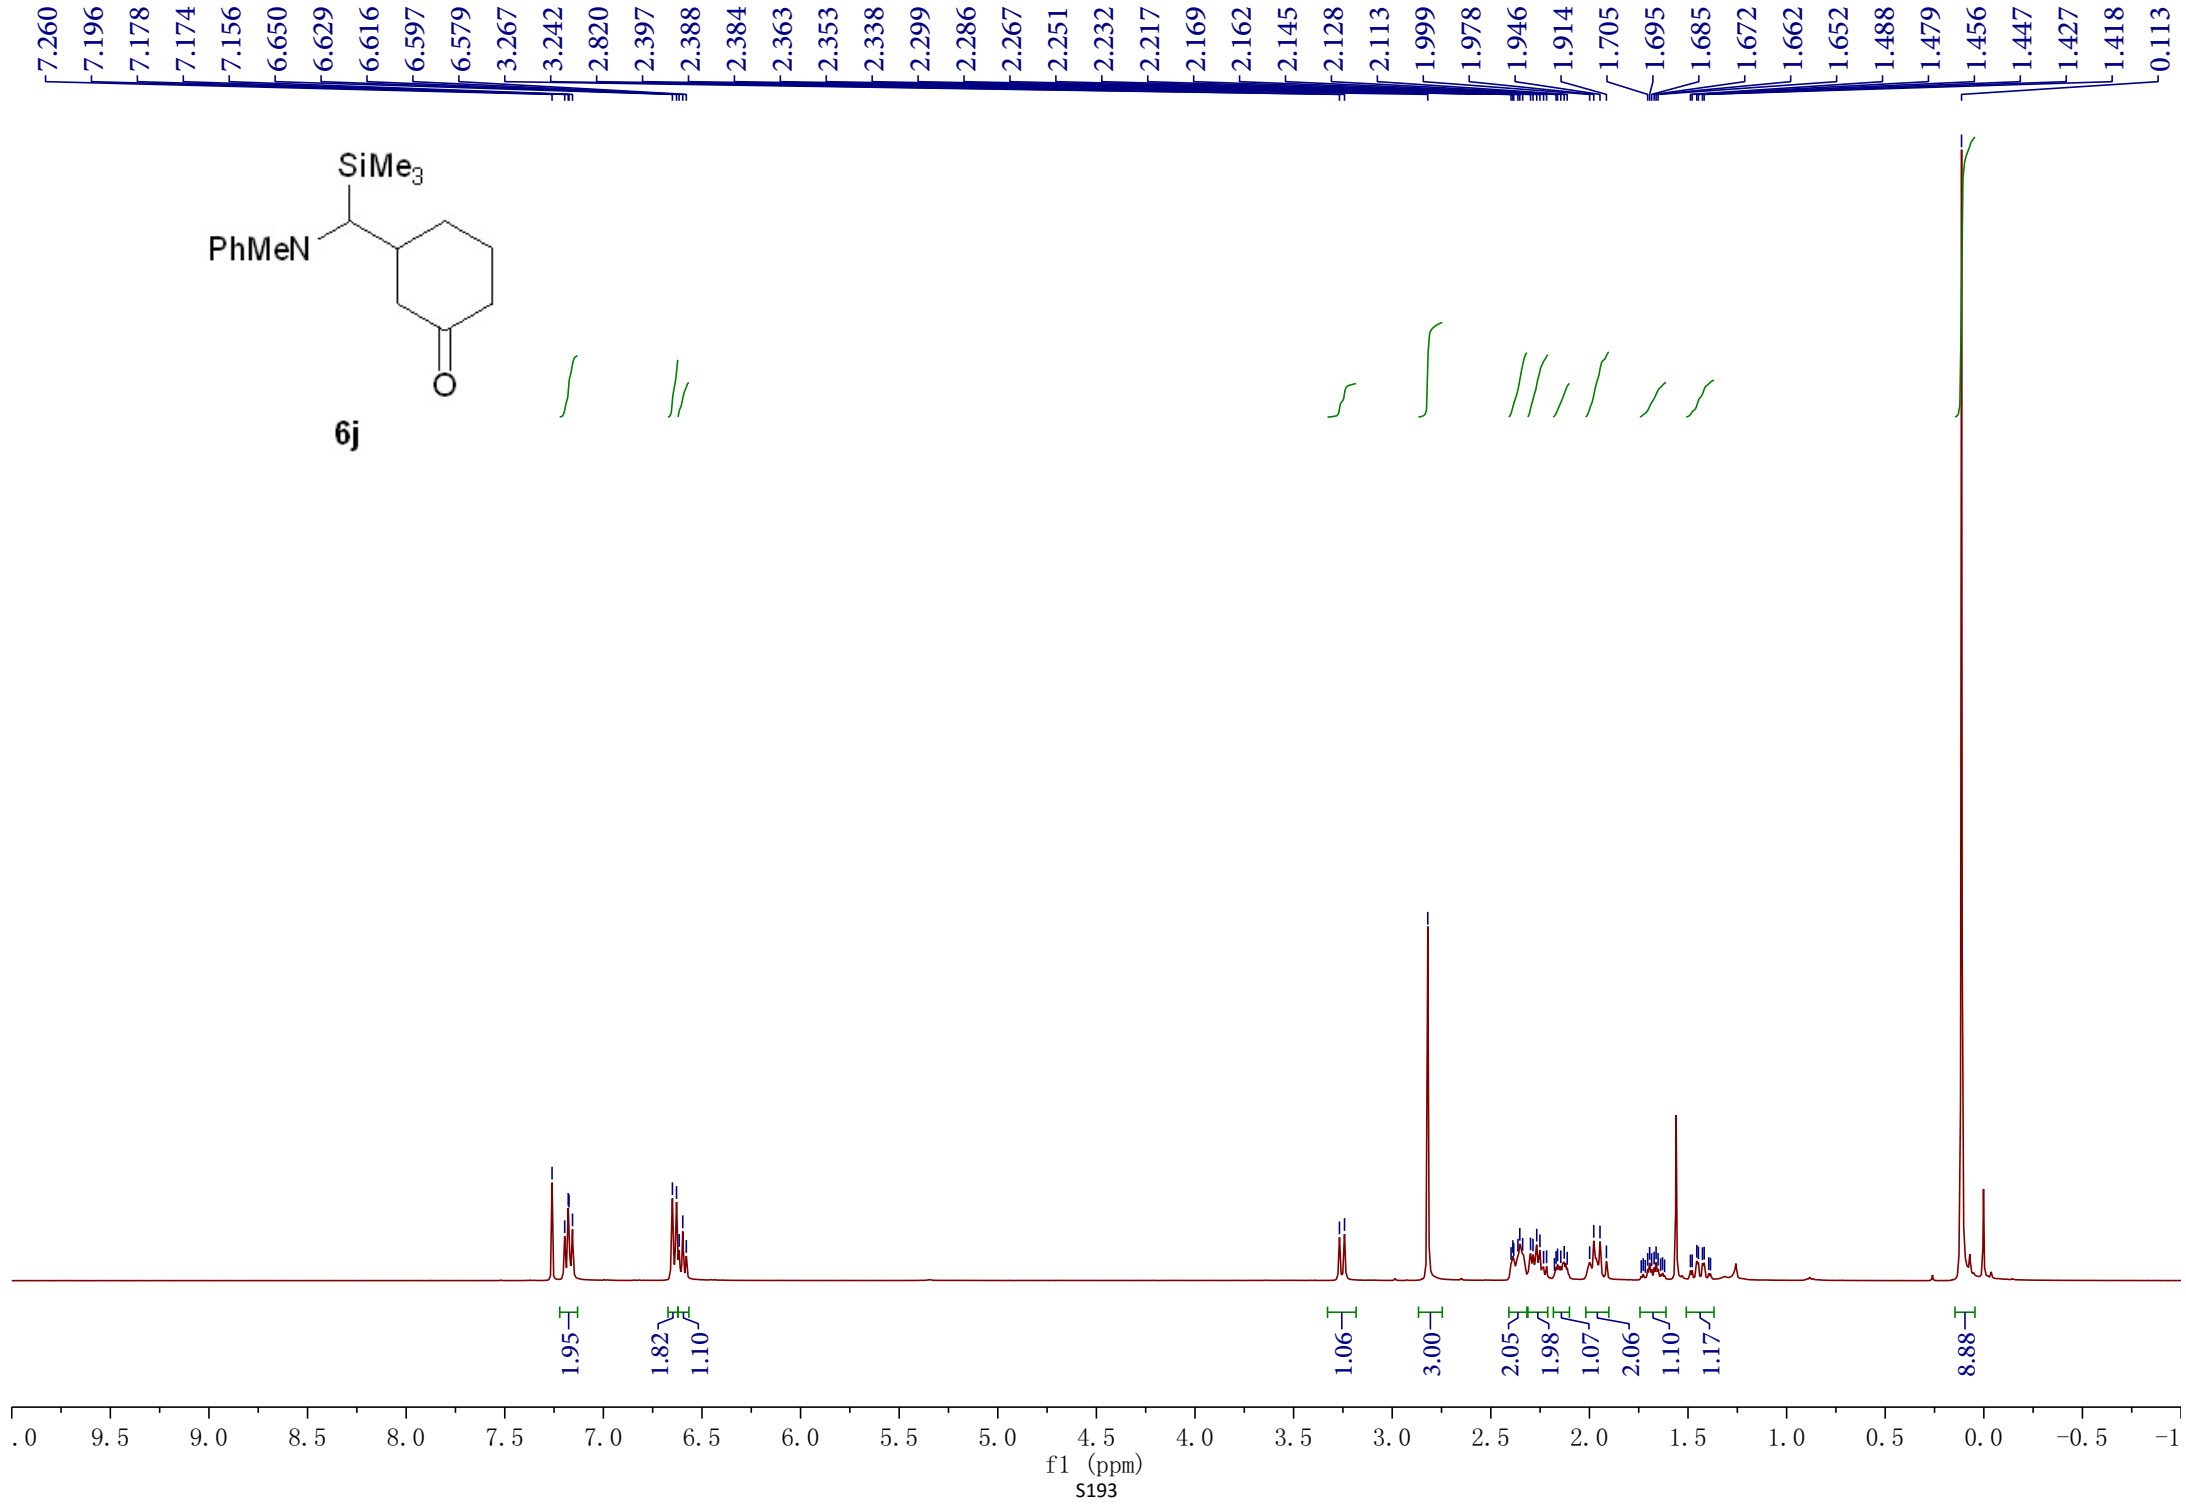

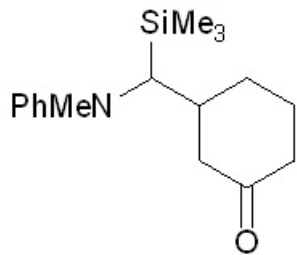

6j

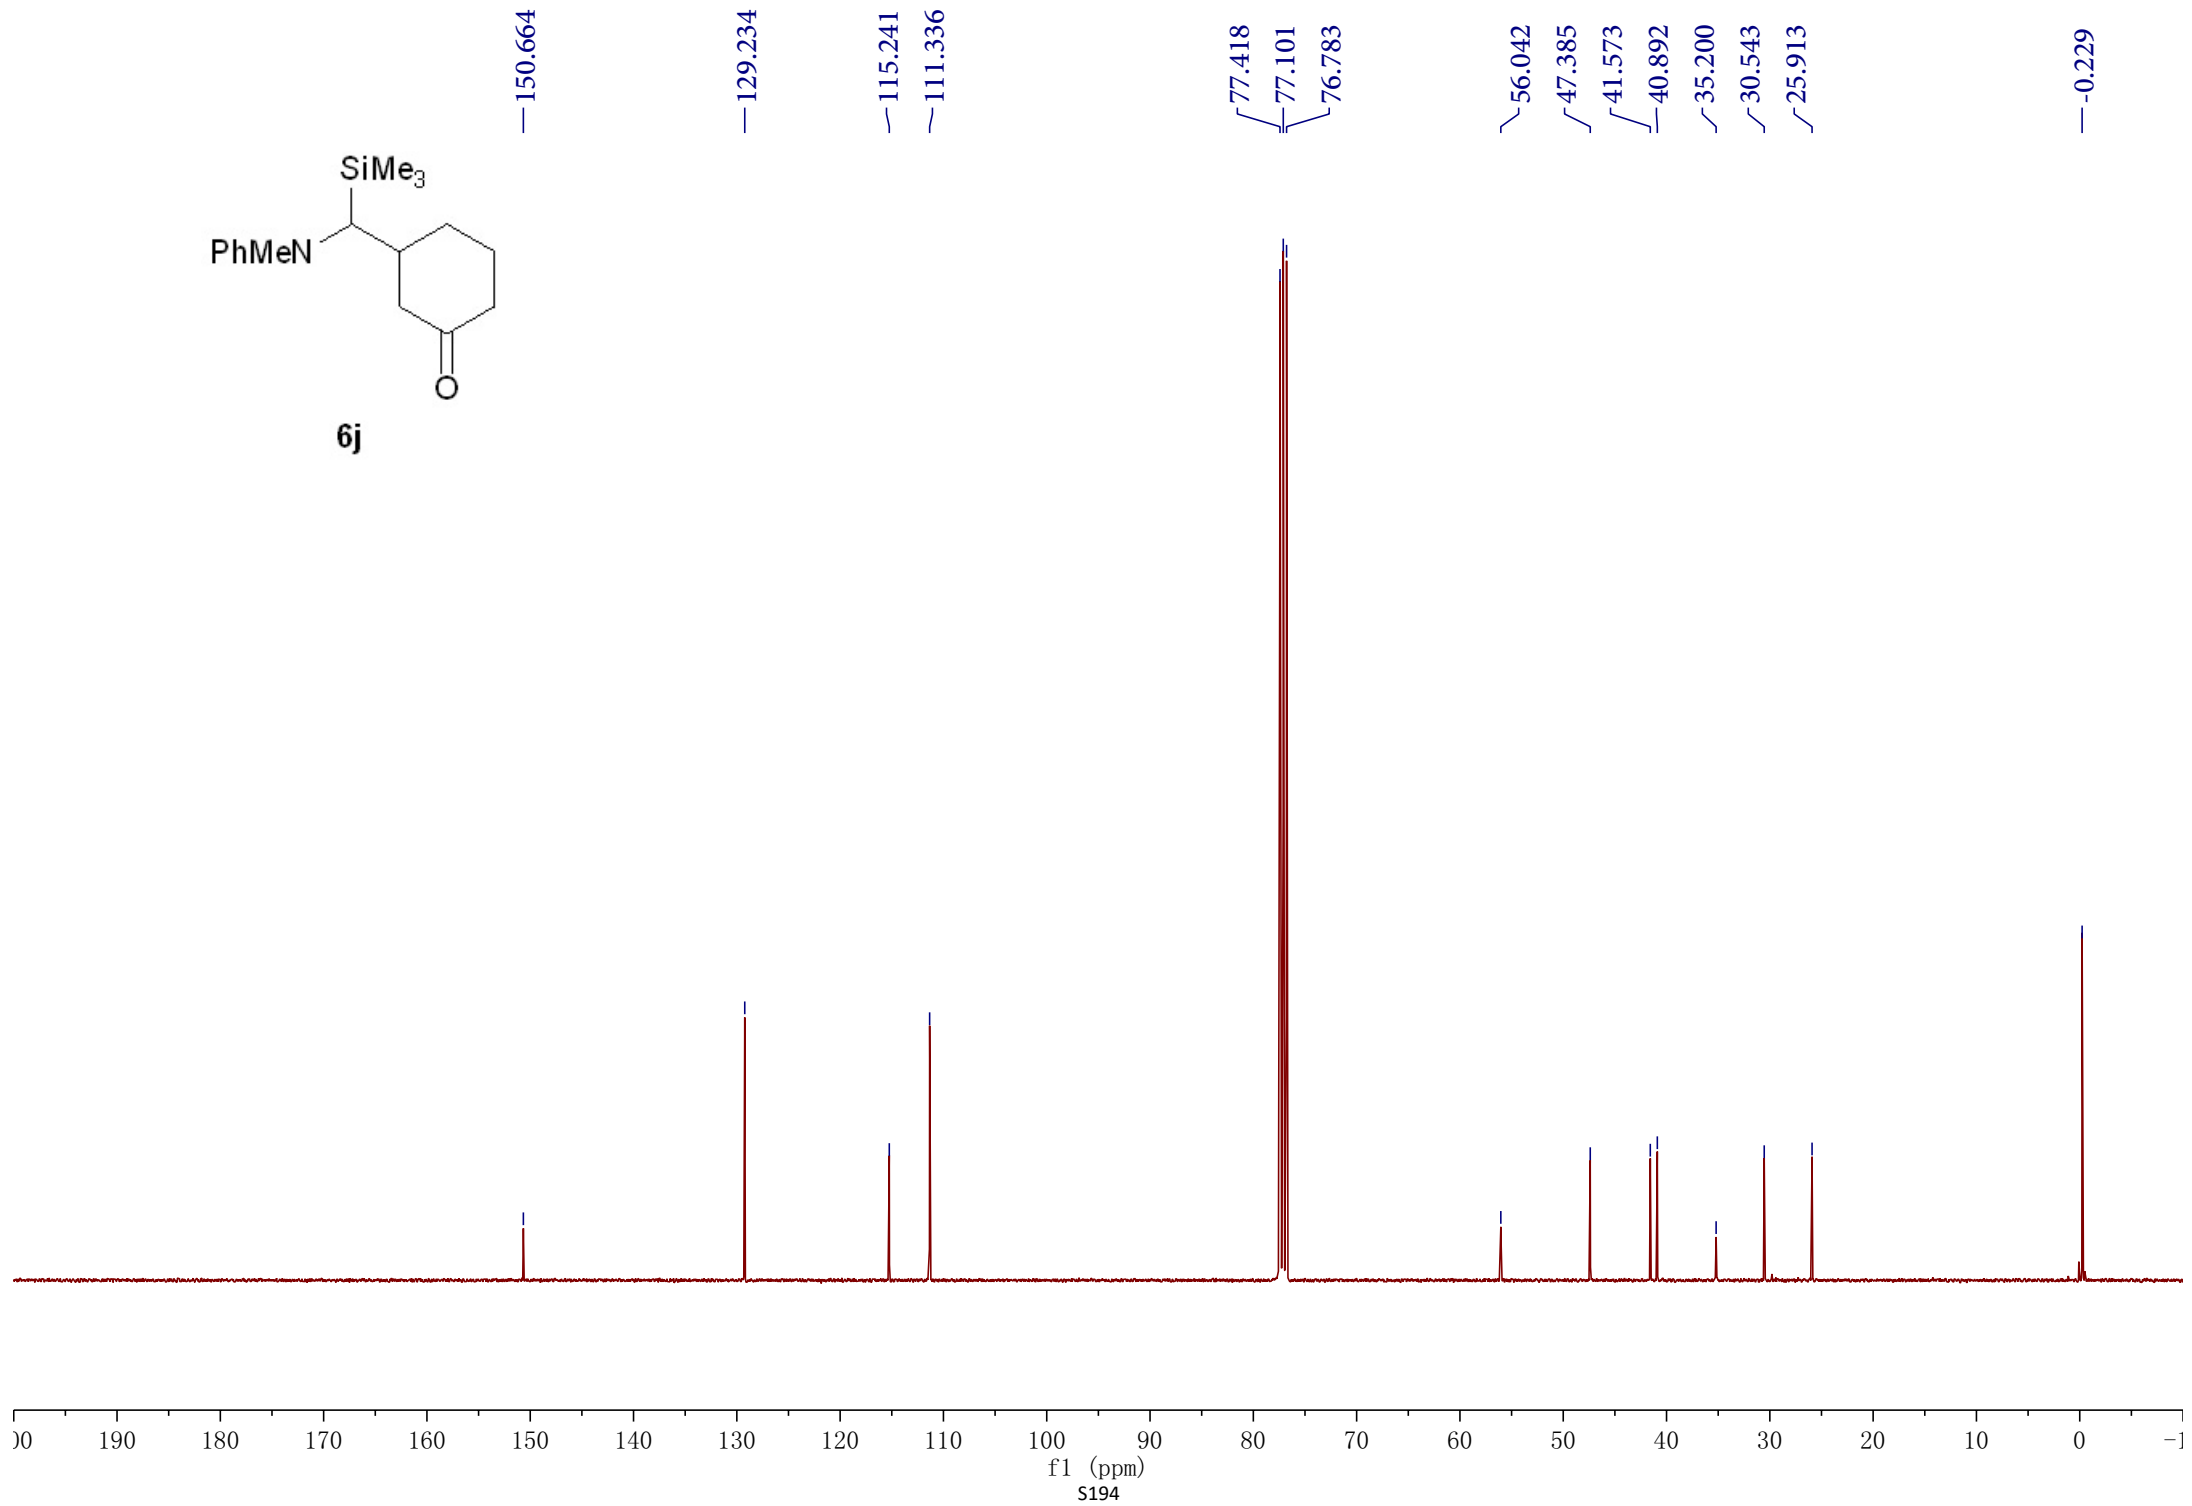

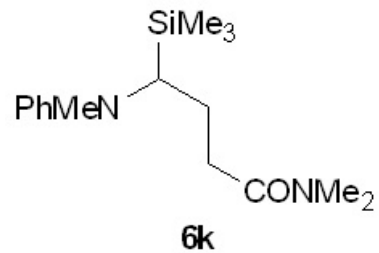

7.260  
7.185  
7.167  
7.163  
7.145  
6.691  
6.671  
6.607  
6.589  
6.571

3.464  
3.451  
3.439  
3.425  
2.874  
2.794  
2.705  
2.304  
2.290  
2.265  
2.251  
2.233  
2.216  
2.194  
2.176  
2.049  
2.034  
2.013  
1.999  
1.988  
1.983  
1.969  
1.955  
1.950  
1.927  
0.056

∫ ∫

∫ ∫ ∫ ∫ ∫ ∫

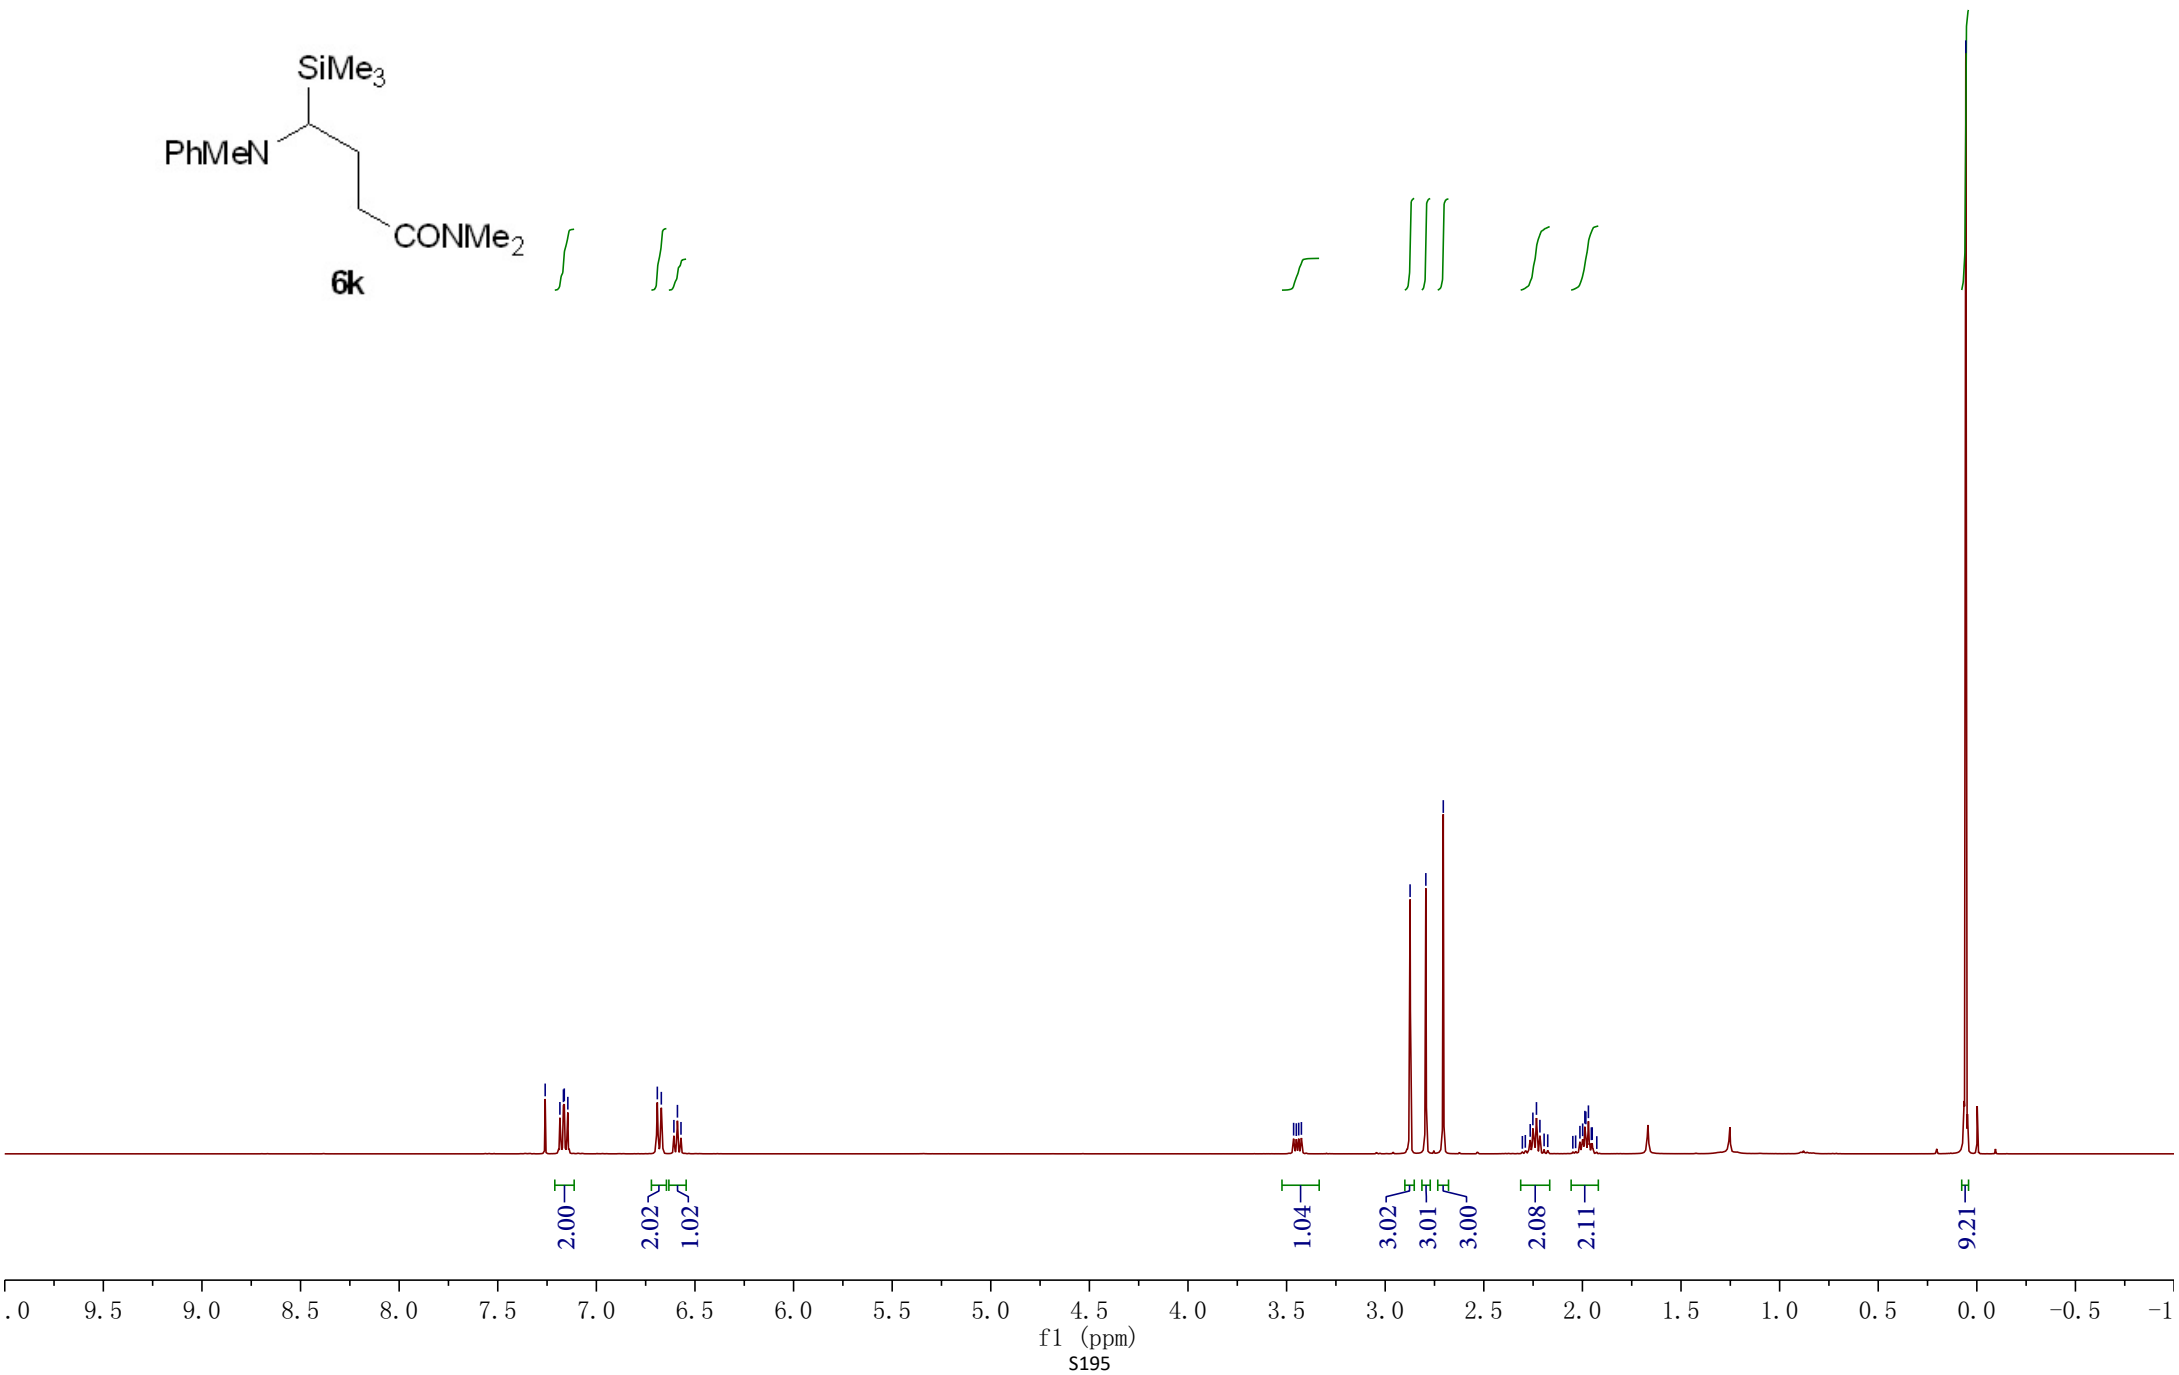

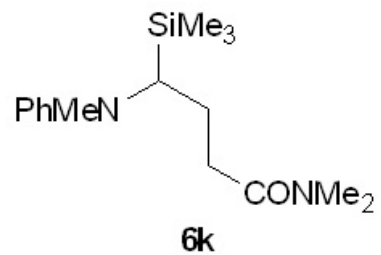

172.852

151.421

129.083

115.115

111.714

77.418

77.100

76.782

49.790

37.087

35.398

34.014

30.619

23.851

-1.645

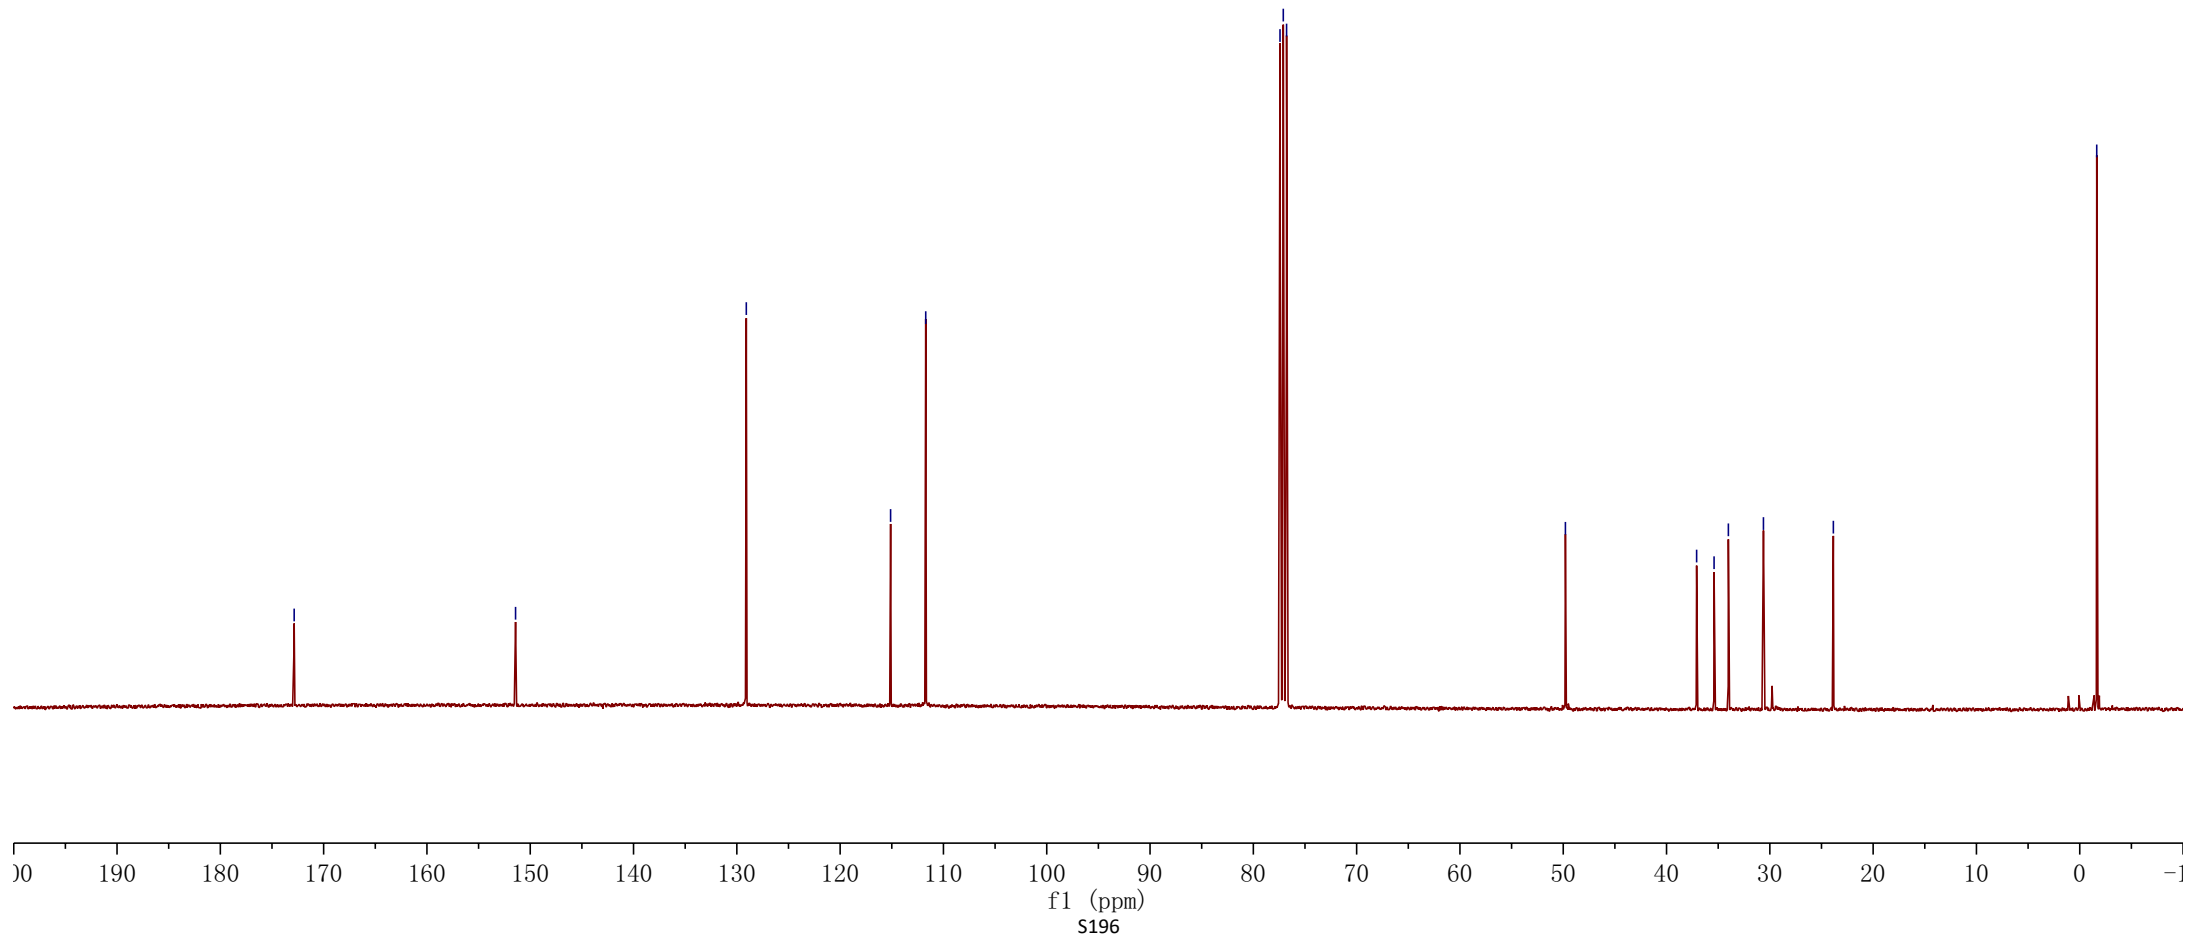

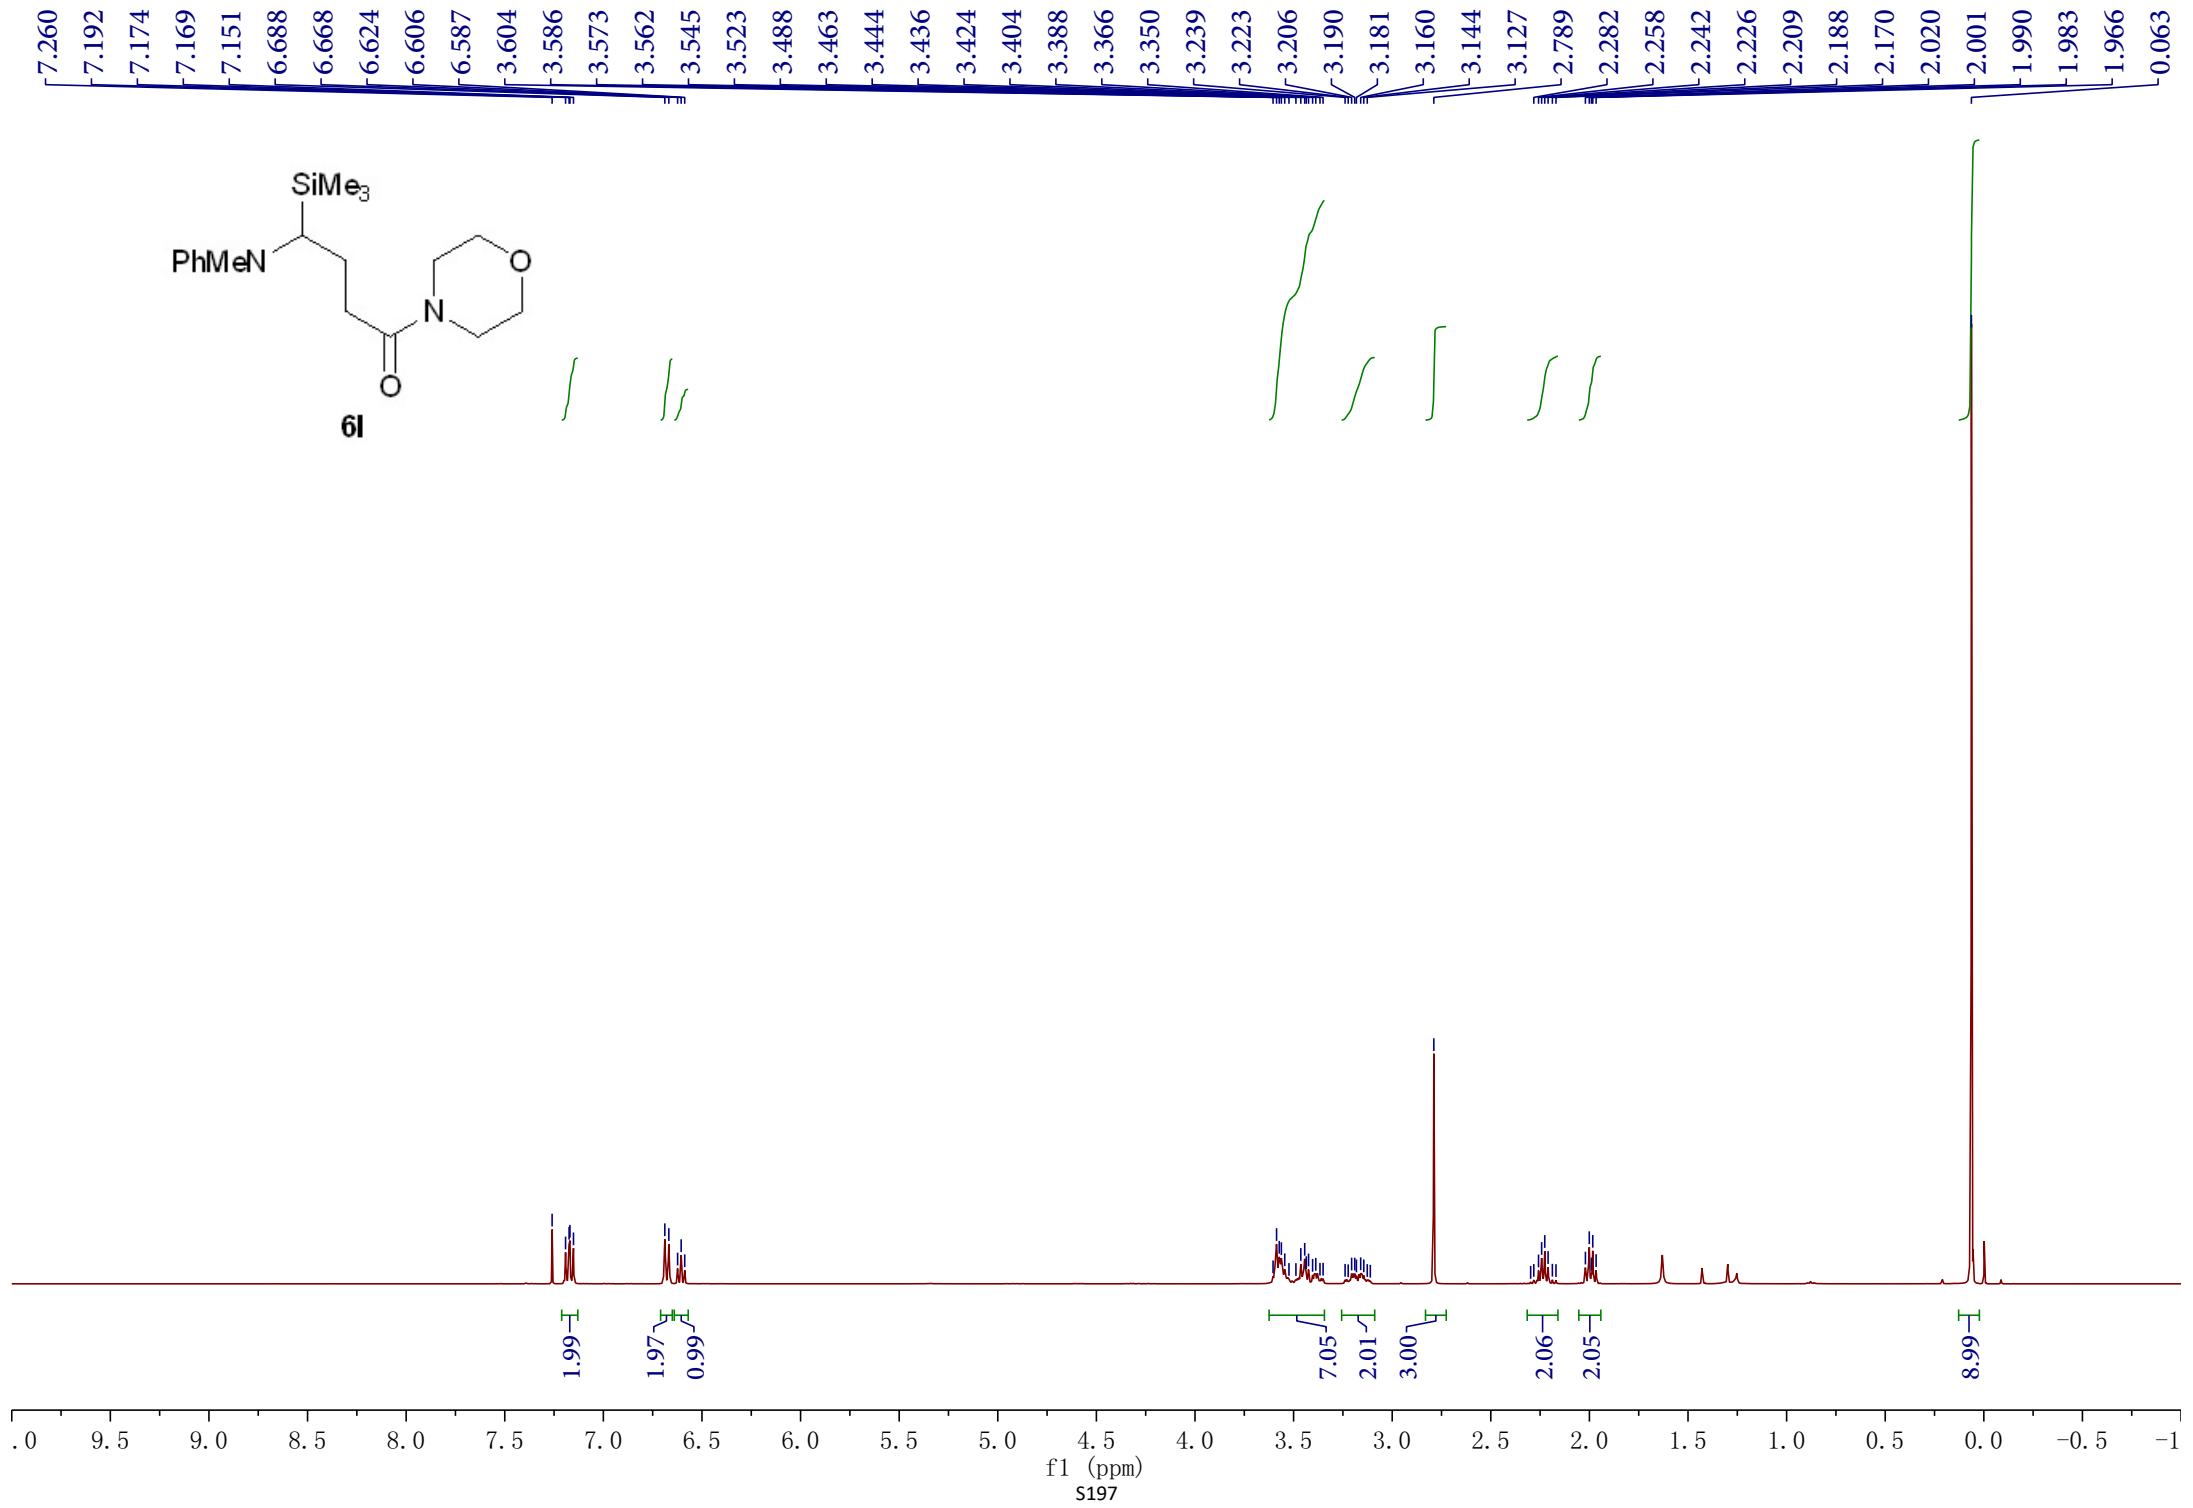

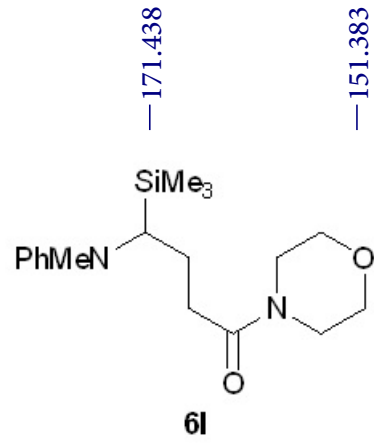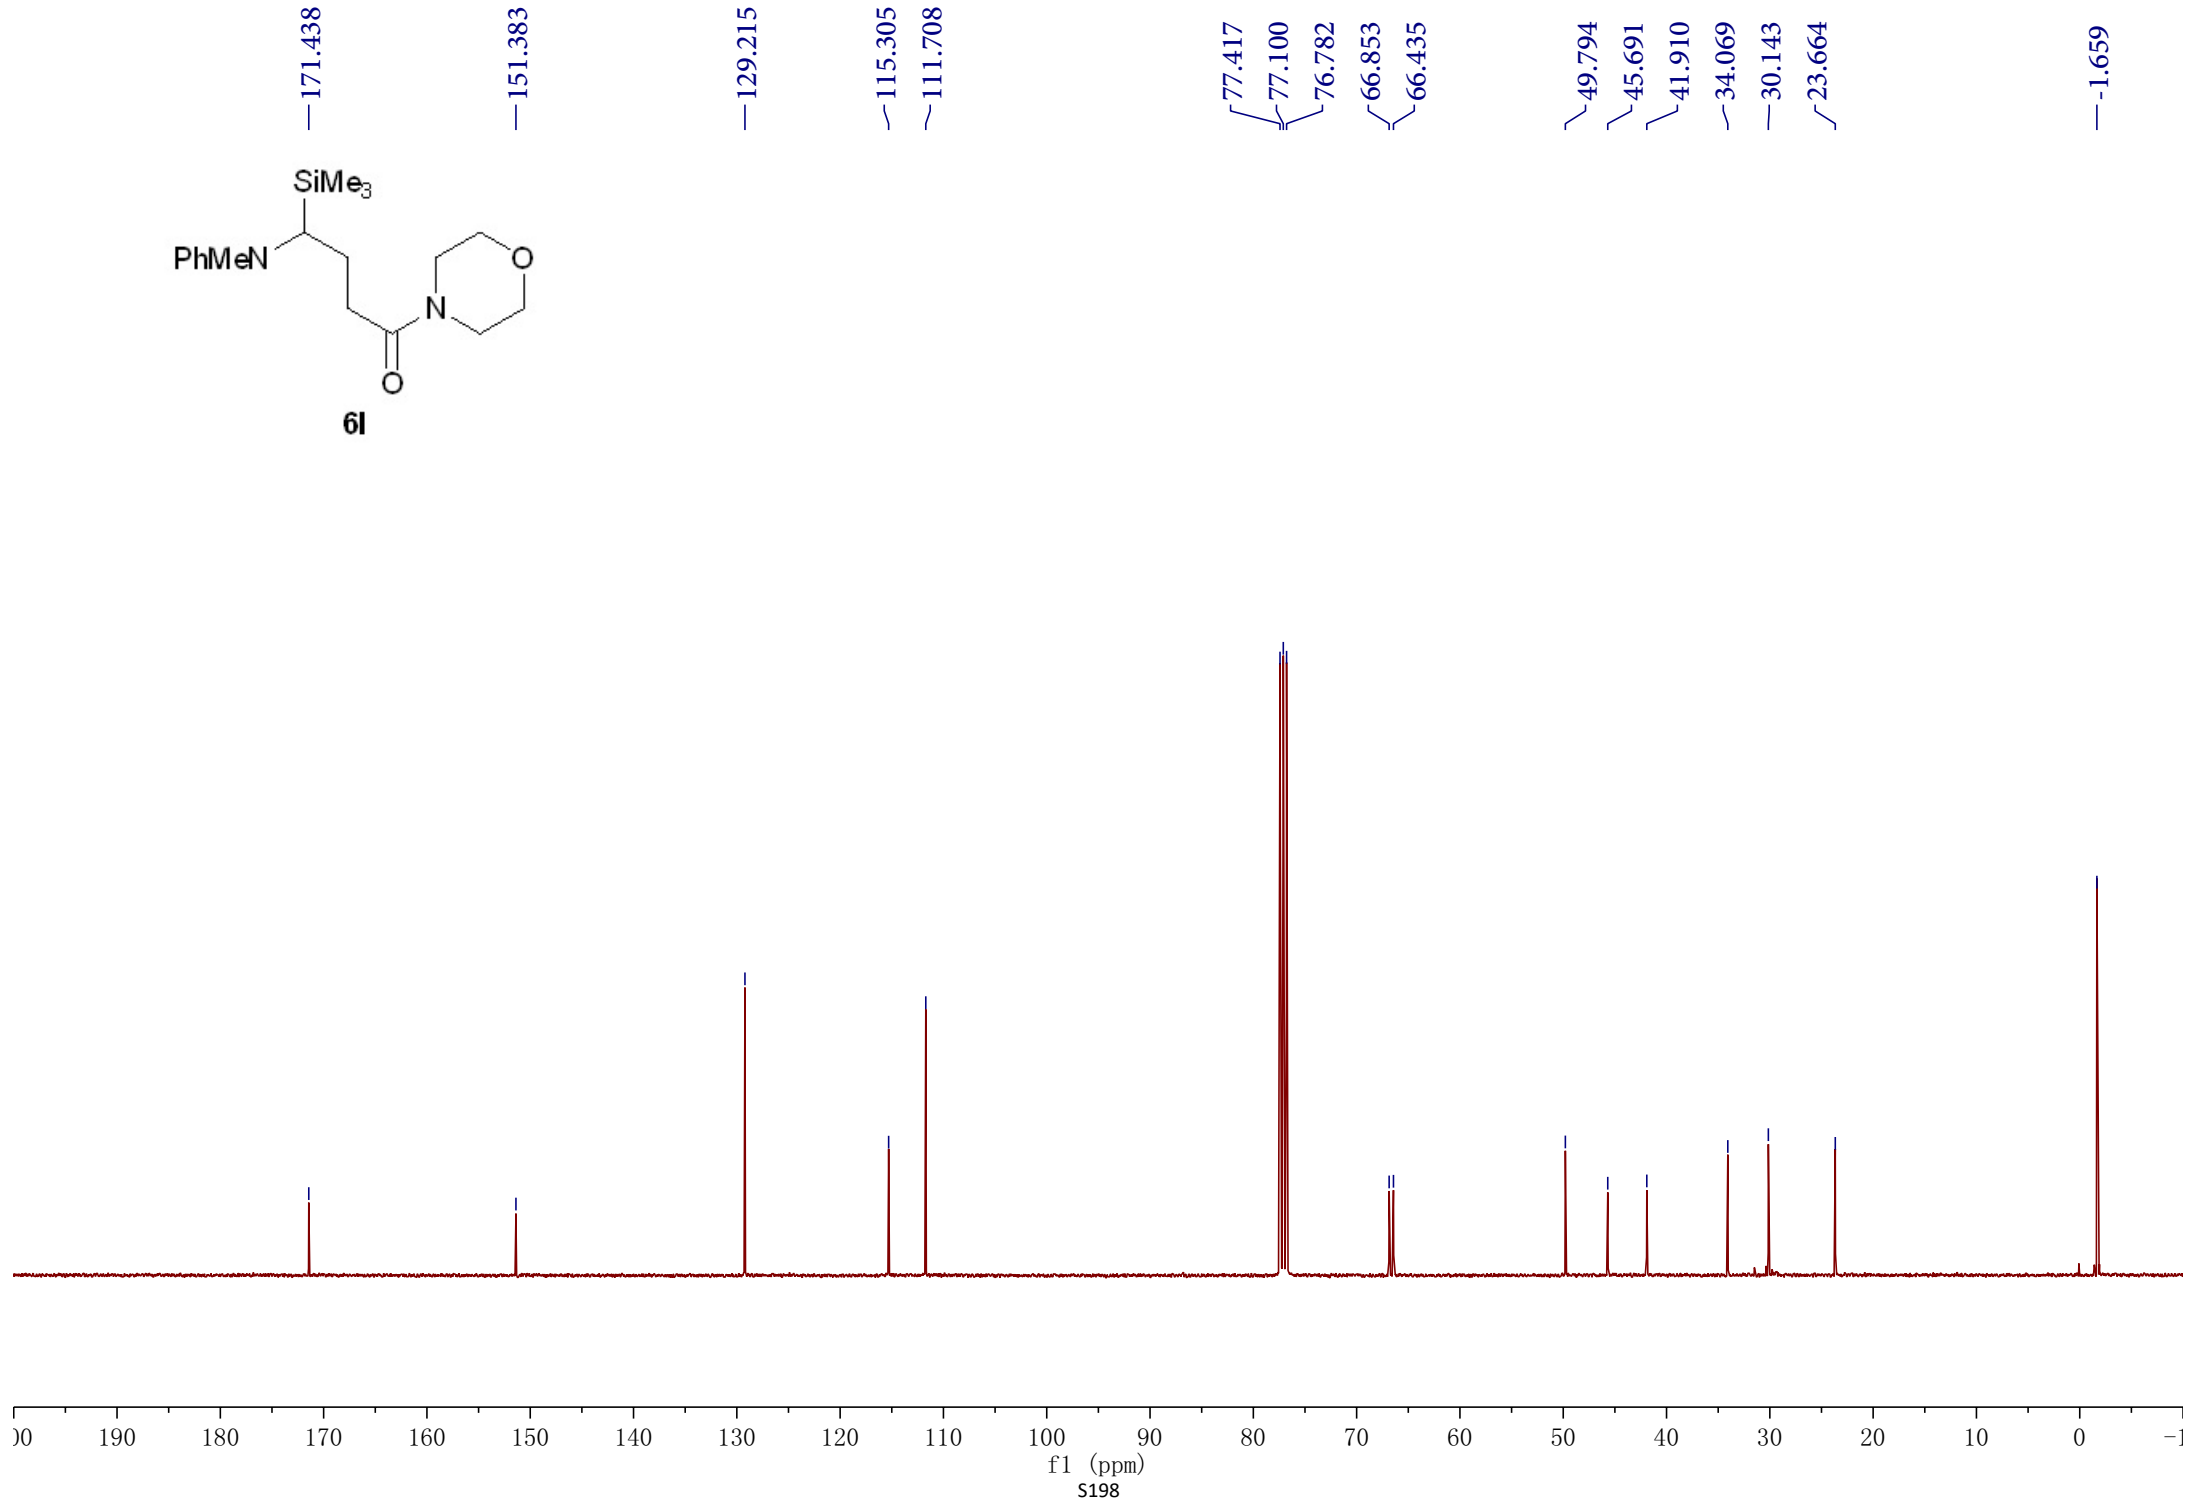

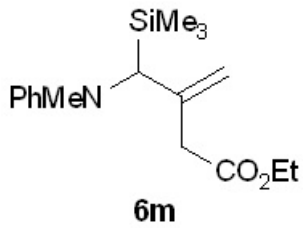

7.260  
7.218  
7.200  
7.196  
7.178  
6.760  
6.739  
6.670  
6.651  
6.633

5.037  
4.995  
4.124  
4.055  
4.037  
4.028  
4.019  
4.010  
3.993  
3.974  
3.954  
3.936  
3.918  
3.909  
3.891  
3.003  
2.996  
2.971  
1.185  
1.167  
1.149  
-0.177

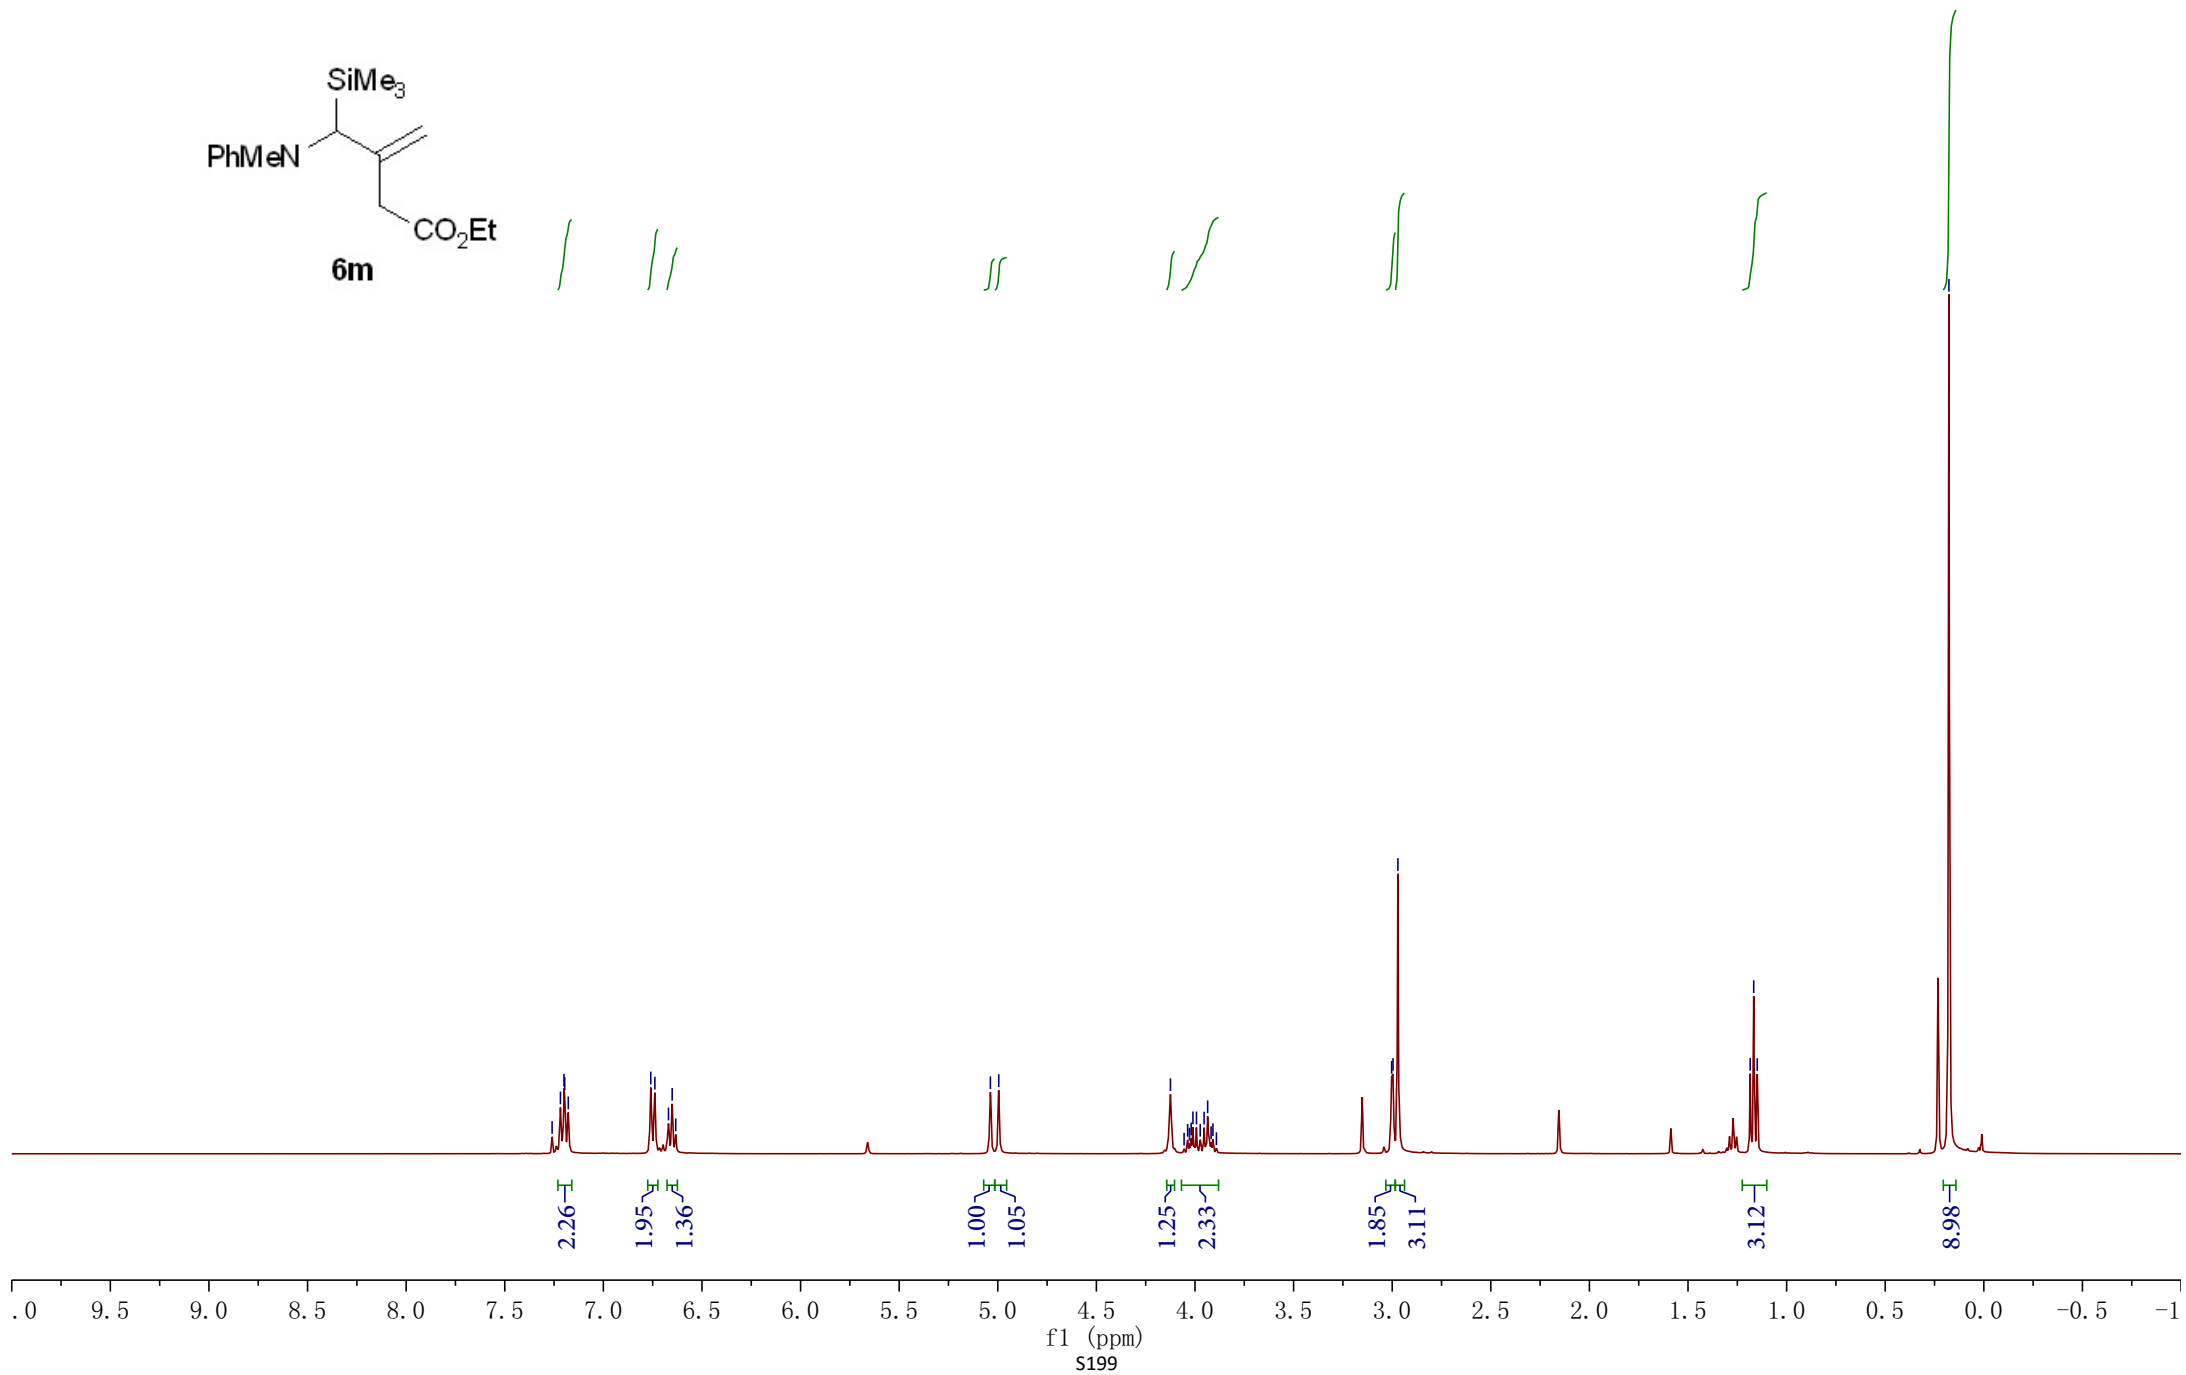

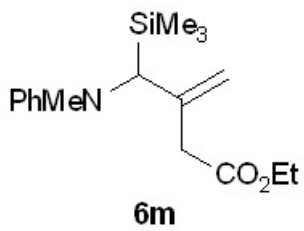

- 171.211
- 150.523
- 142.168
- 128.995
- 115.821
- 114.065
- 111.903
- 77.418
- 77.100
- 76.783
- 60.639
- 58.384
- 40.607
- 37.601
- 14.153
- -0.397

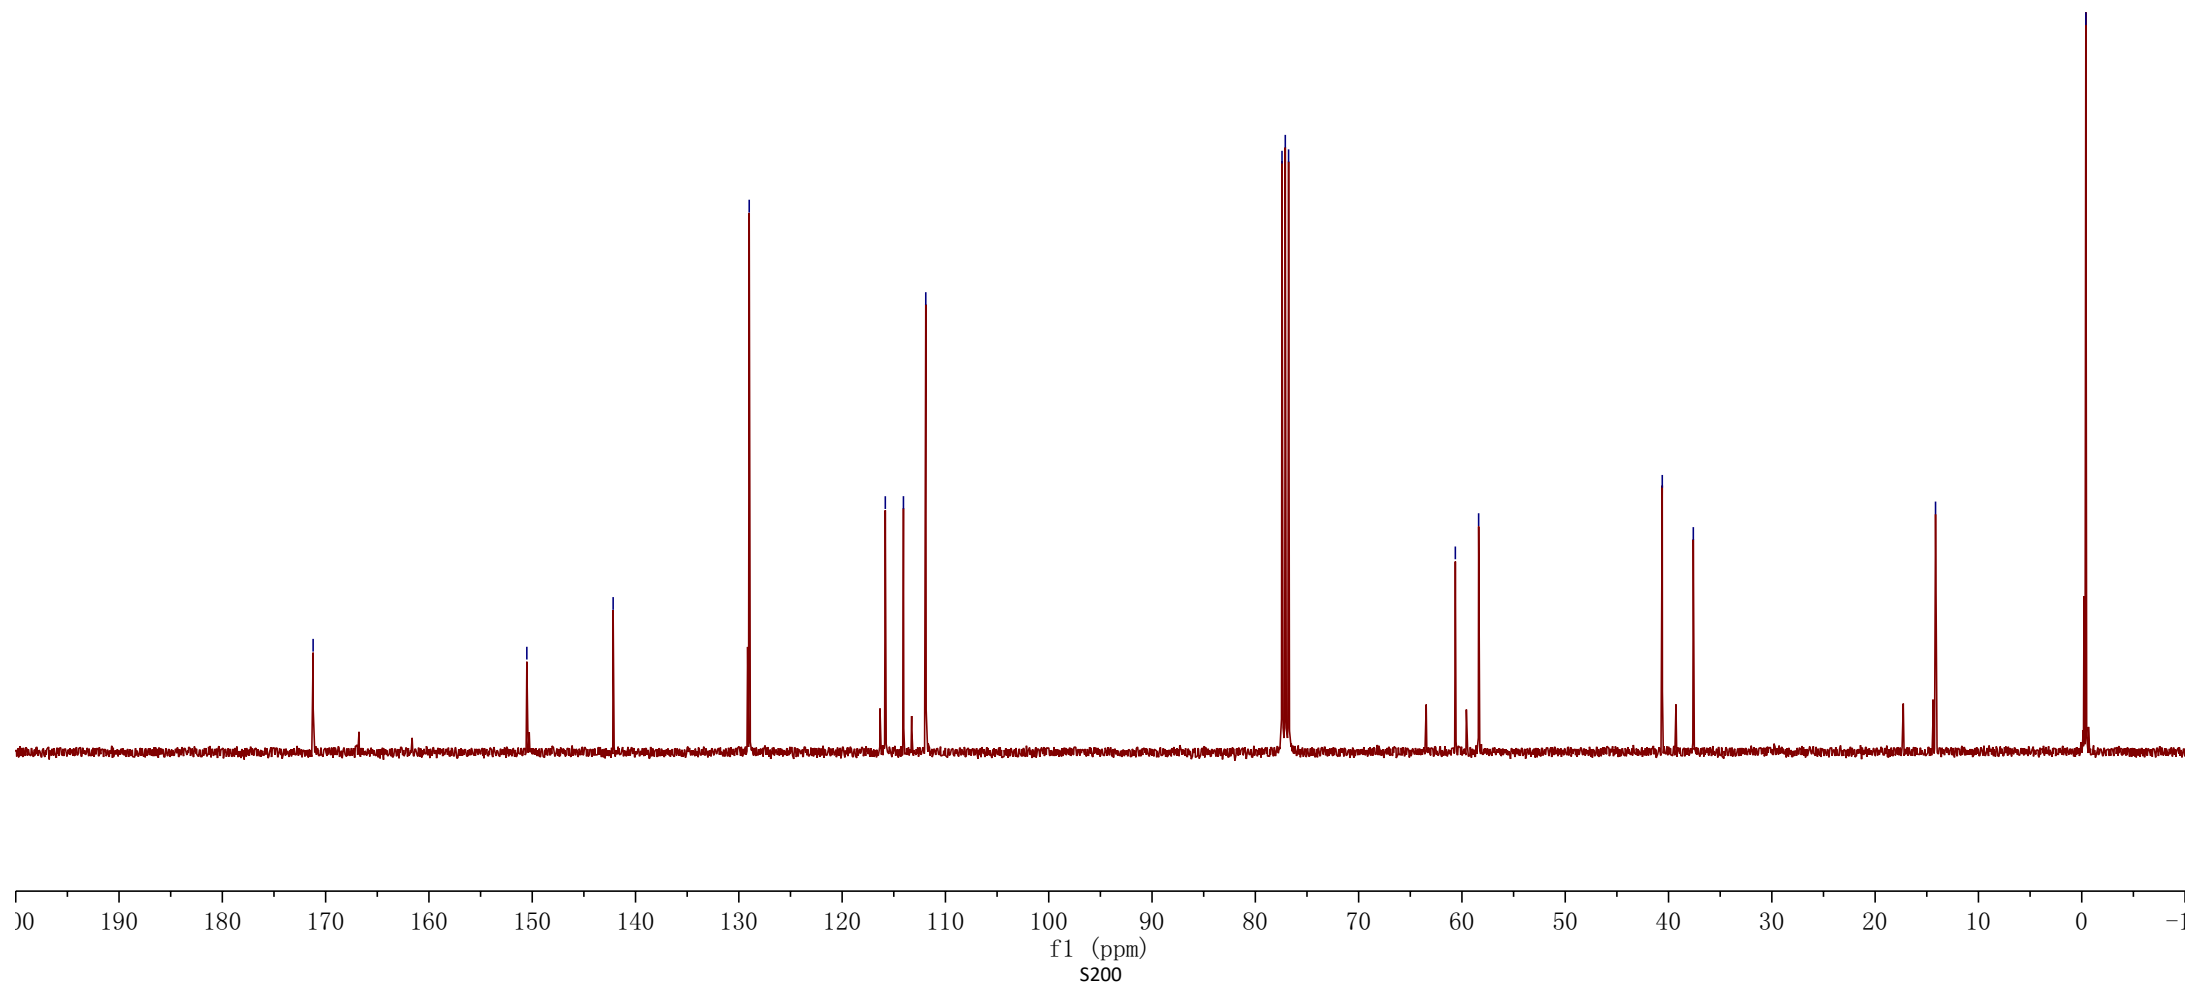



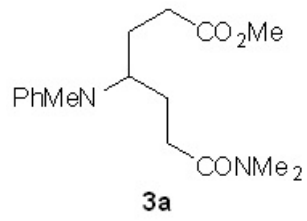

7.260  
7.196  
7.178  
7.174  
7.156  
6.739  
6.719  
6.670  
6.651  
6.633

4.033  
4.021  
4.008  
3.996  
3.983  
3.971  
3.959  
3.575

2.856  
2.699  
2.673

2.284  
2.265  
2.246  
2.216  
2.197  
2.178  
2.168  
1.952  
1.935  
1.917  
1.900  
1.885  
1.865  
1.852  
1.830

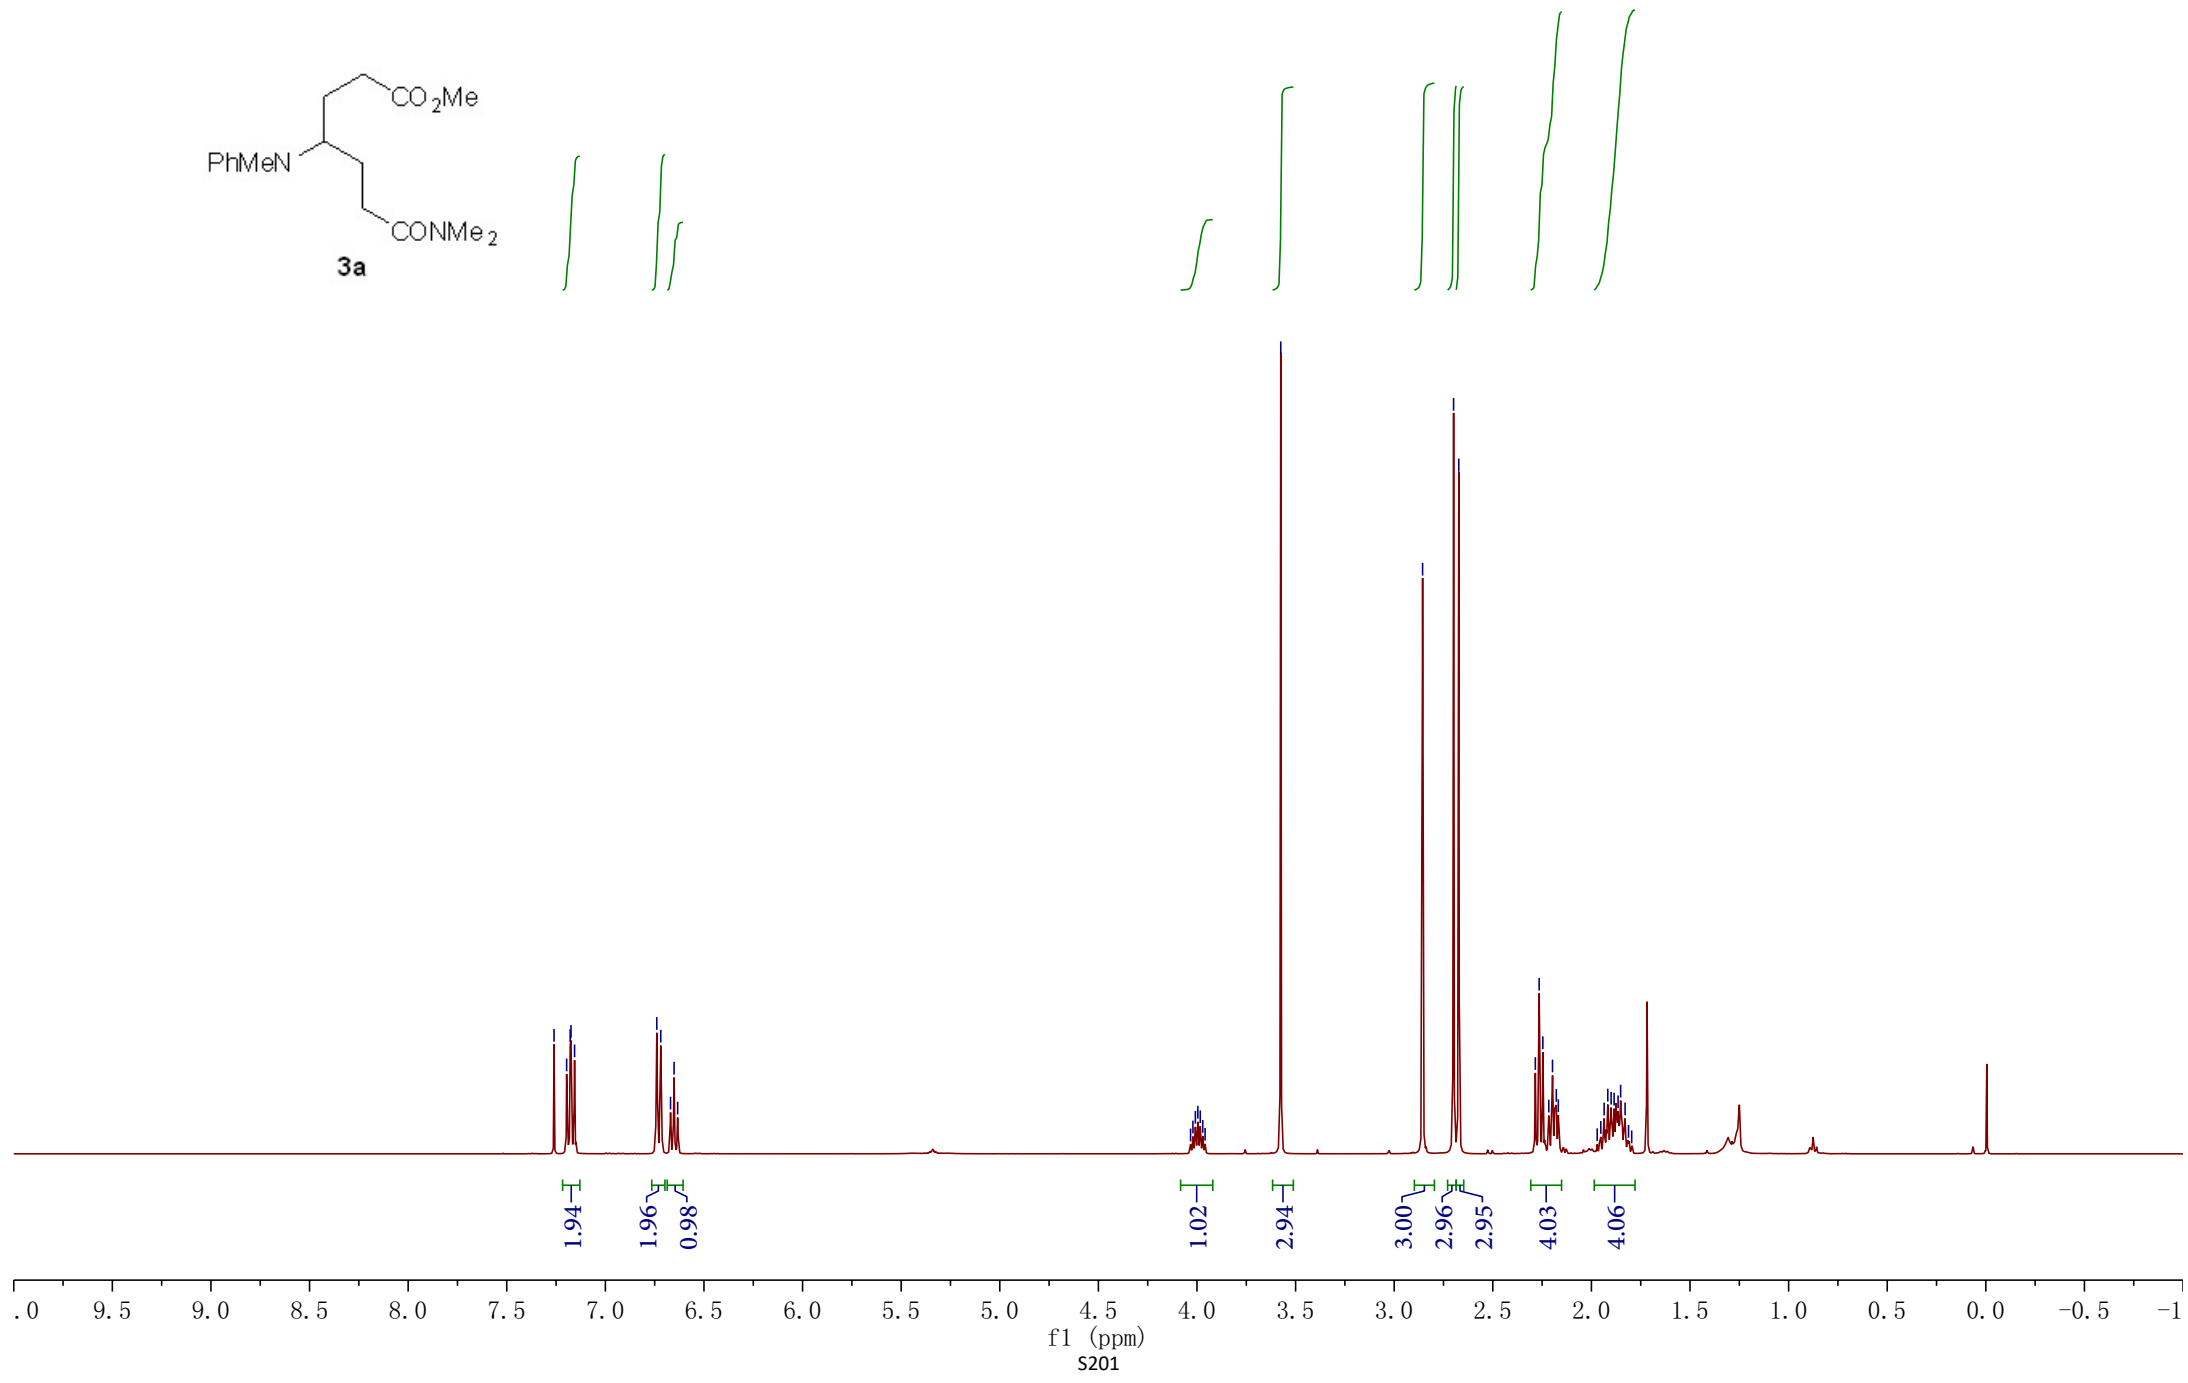

173.987

172.373

151.115

129.190

116.411

112.601

77.417

77.100

76.782

56.511

51.557

37.019

35.413

31.215

29.516

29.474

28.253

28.074

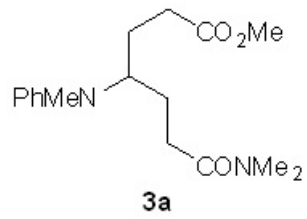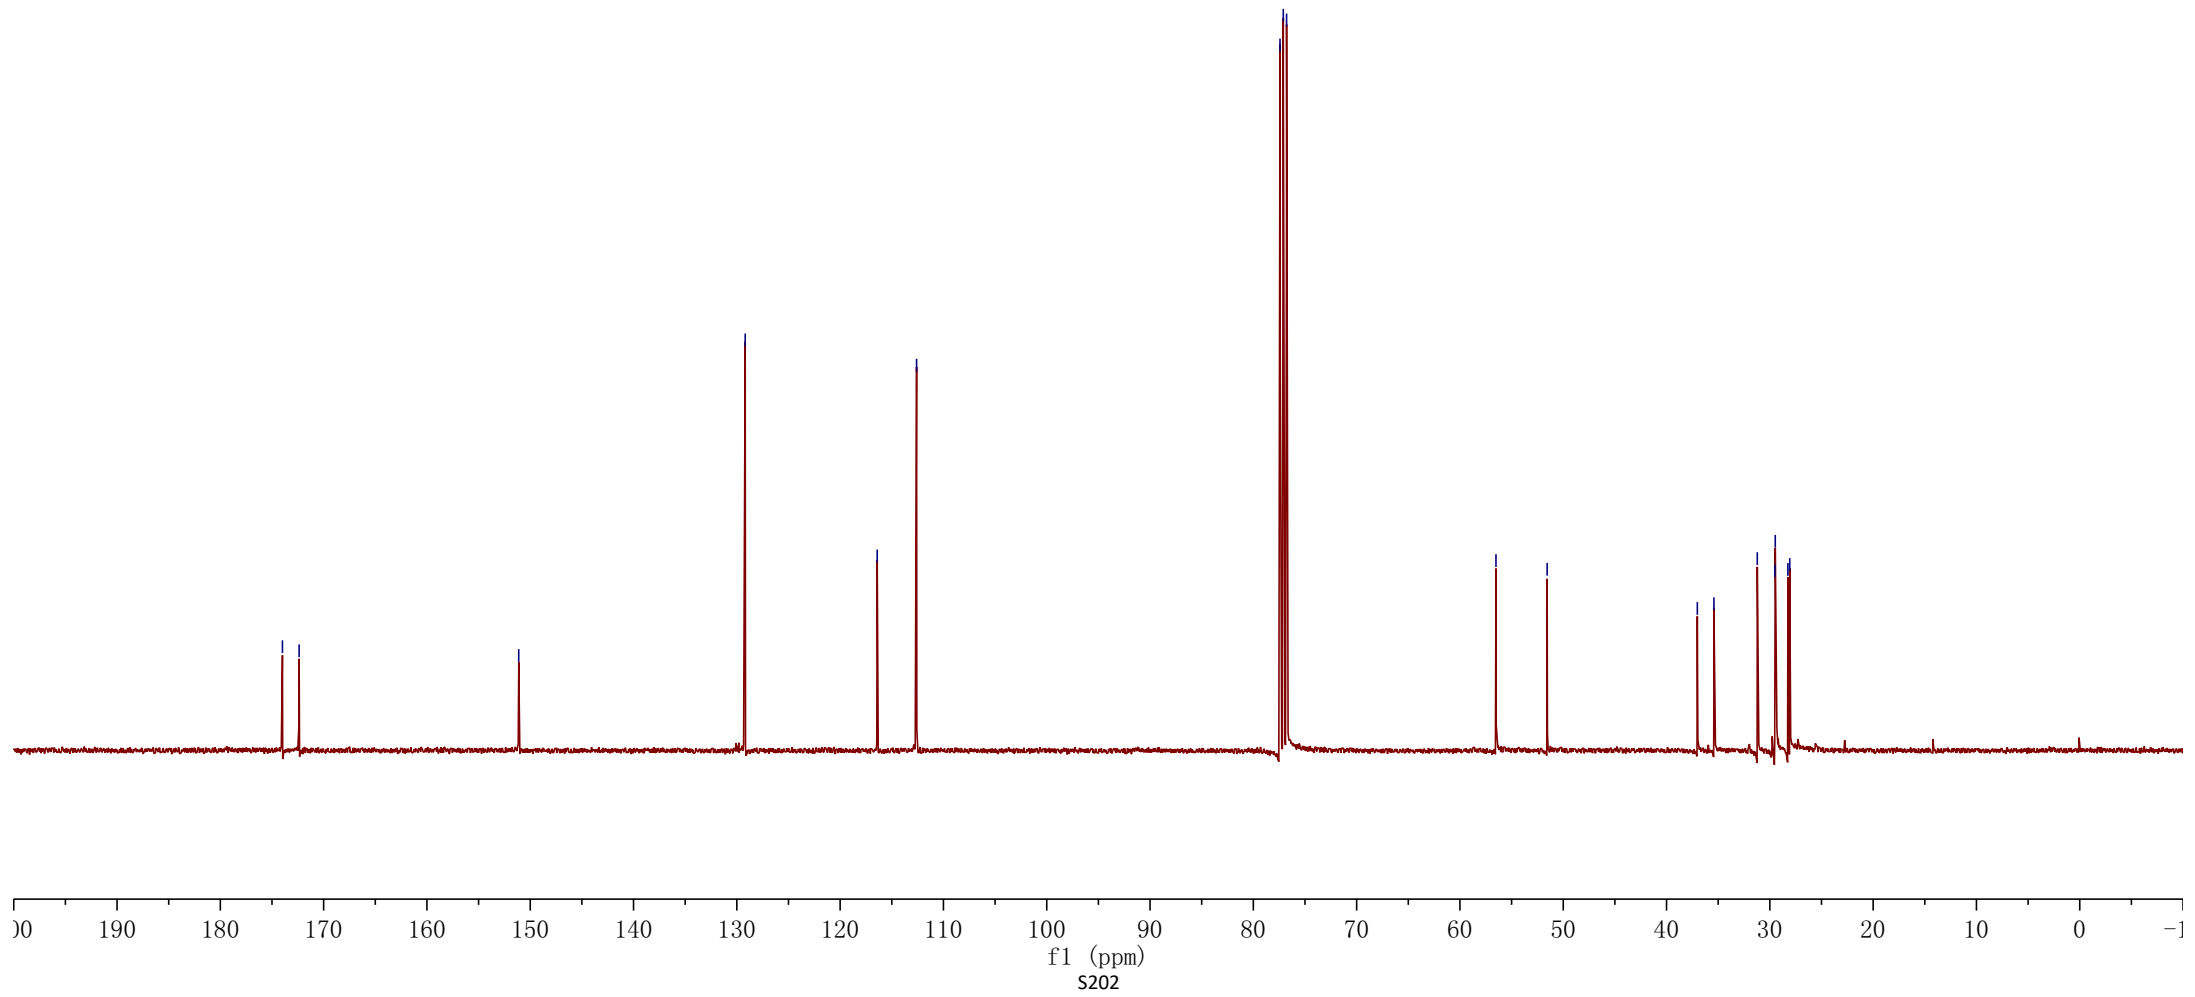

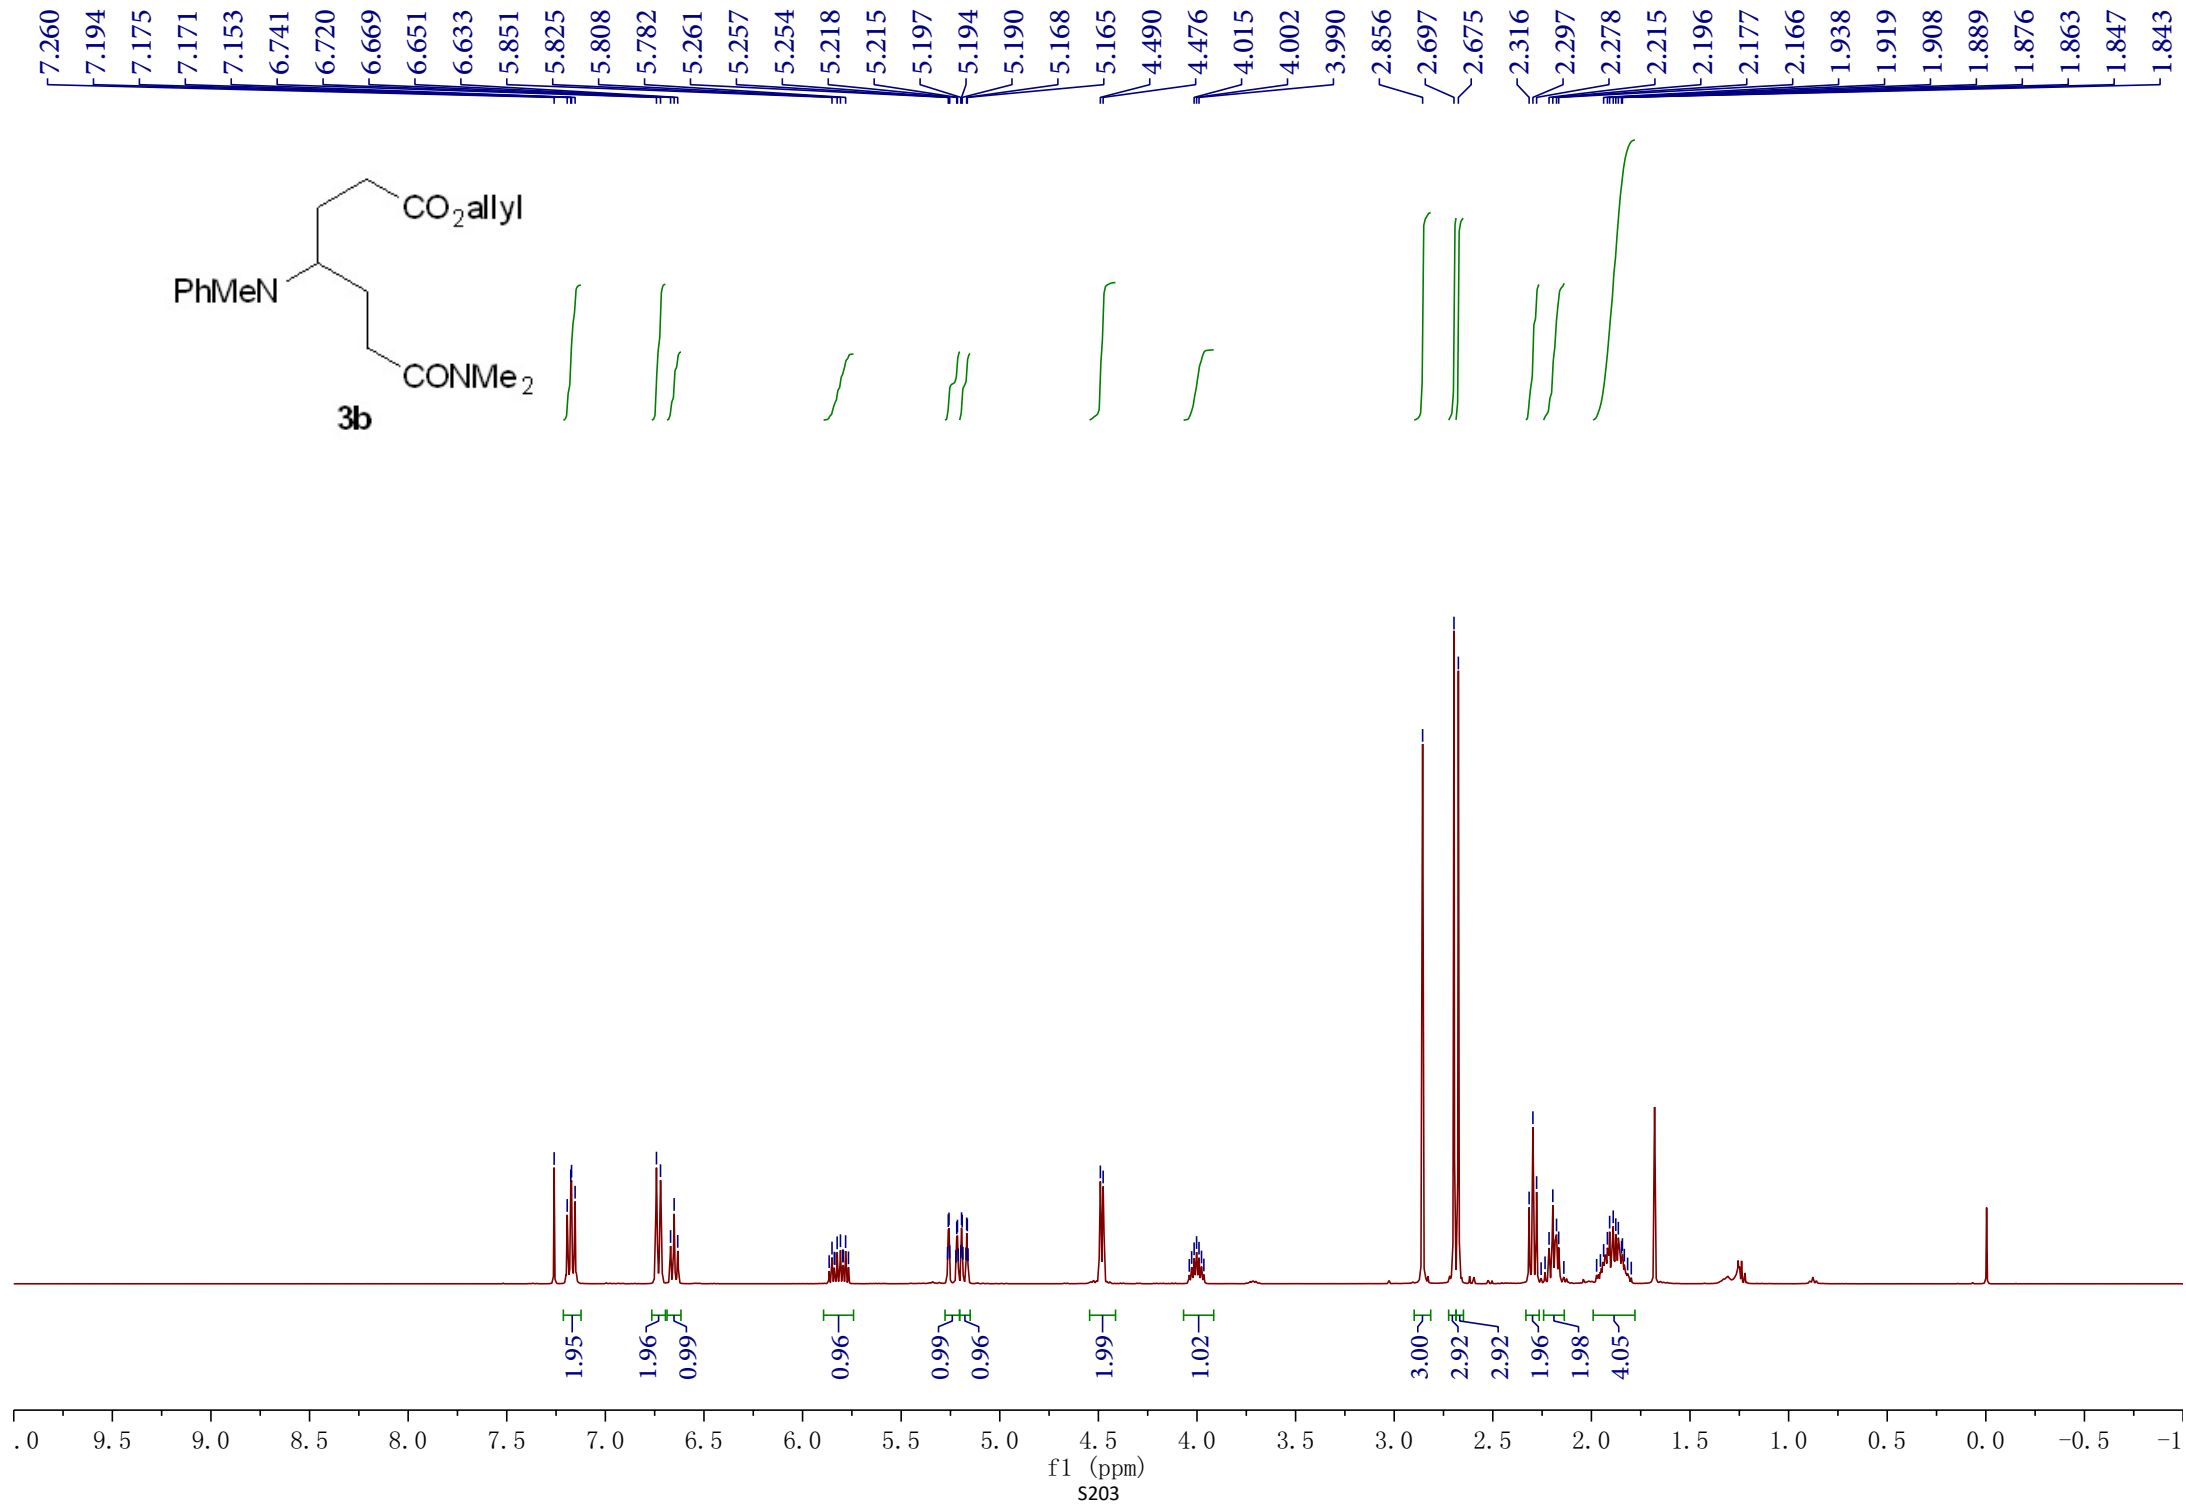

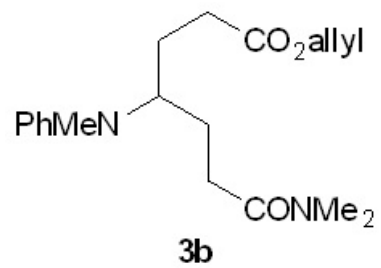

173.194  
172.362  
151.108

132.243  
129.202  
118.285  
116.420  
112.608

77.418  
77.101  
76.783  
65.150  
56.541

37.018  
35.415  
31.387  
29.526  
29.487  
28.234  
28.106

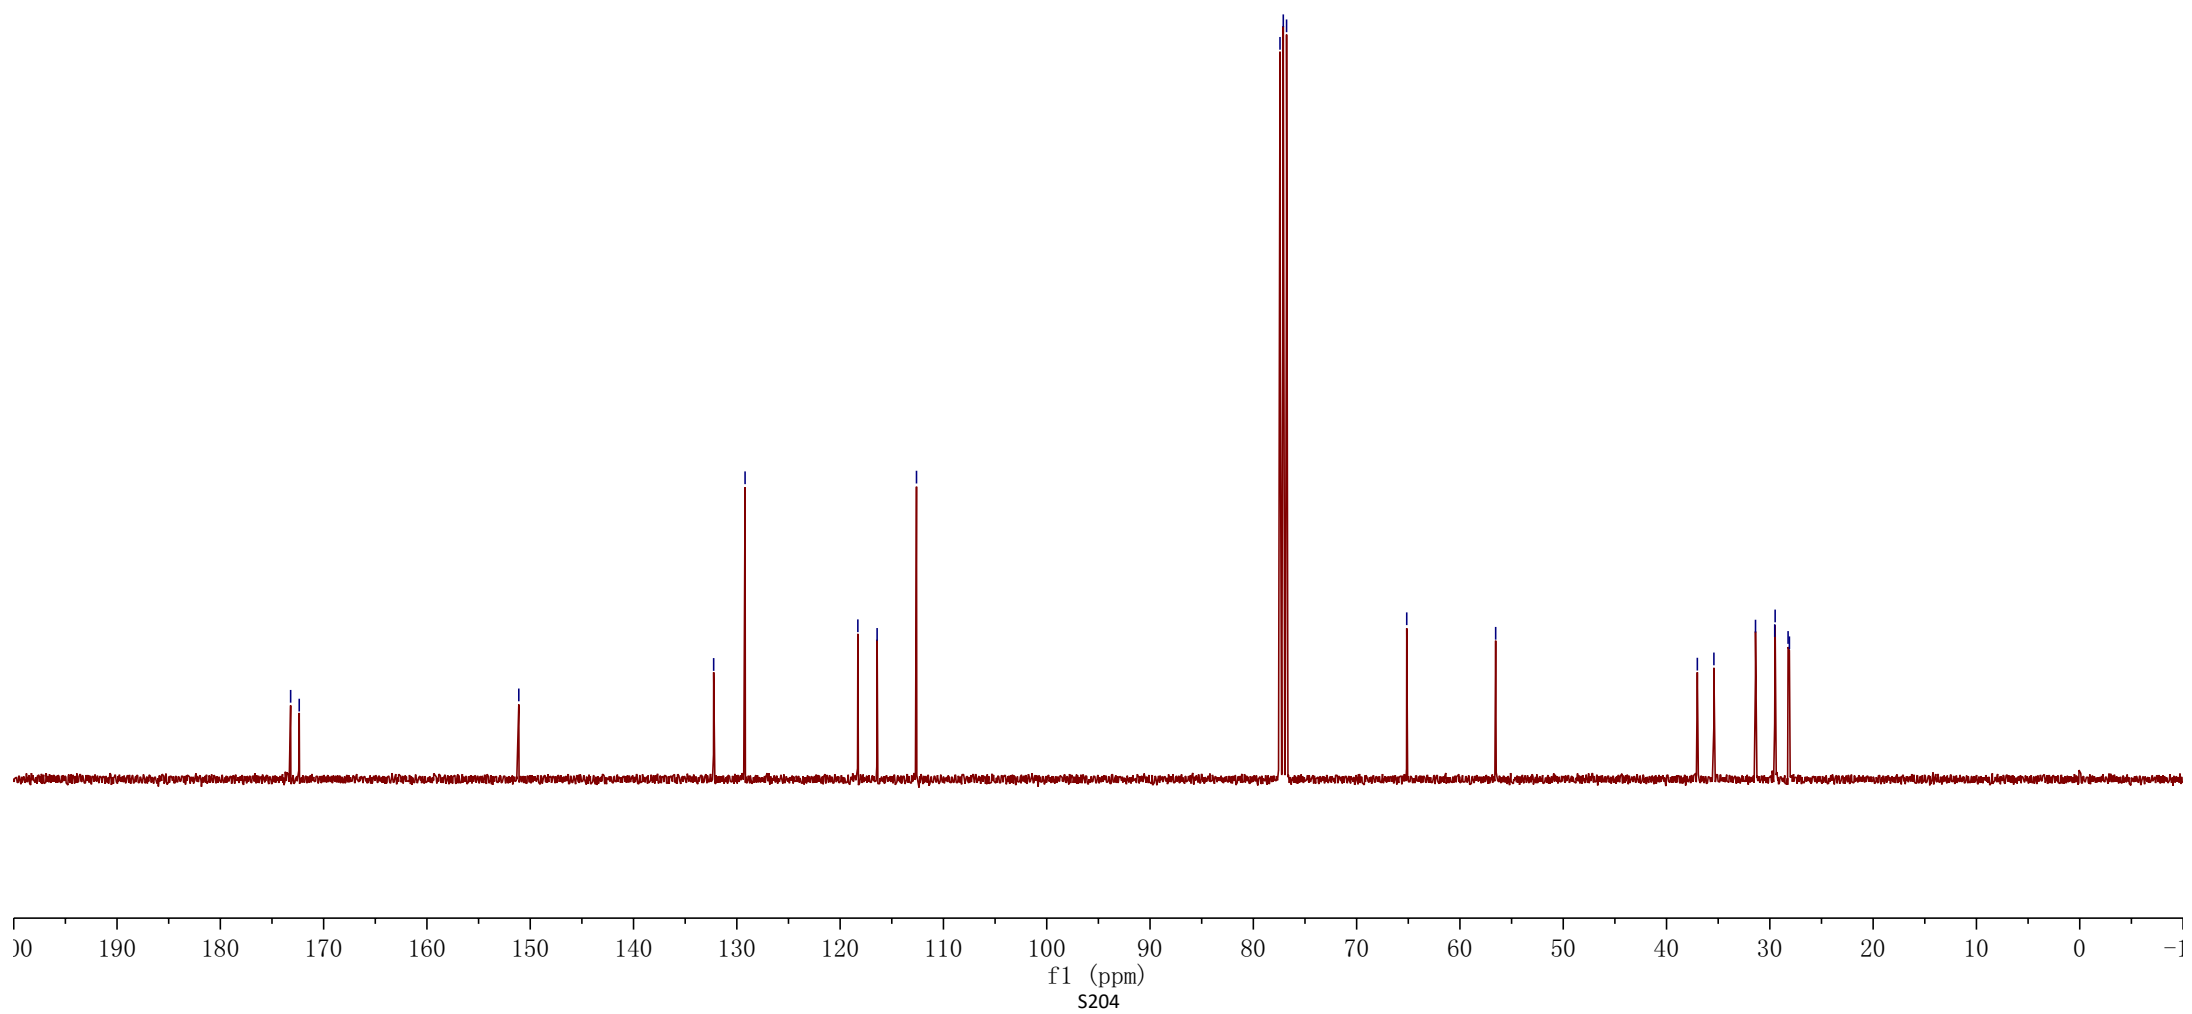

7.260 7.191 7.173 7.169 7.151 6.738 6.718 6.666 6.648 6.630 4.140 4.128 4.116 4.025 4.013 4.000 3.988 3.975 3.963 3.488 3.476 3.464 3.330 2.856 2.698 2.670 2.329 2.310 2.291 2.234 2.213 2.194 2.182 2.175 2.165 1.970 1.959 1.940 1.929 1.911 1.904 1.886 1.869 1.857 1.837 1.822 1.815

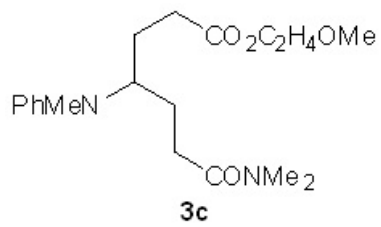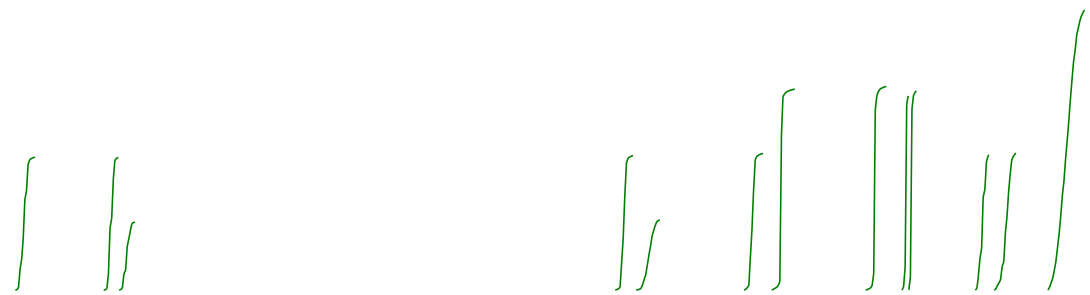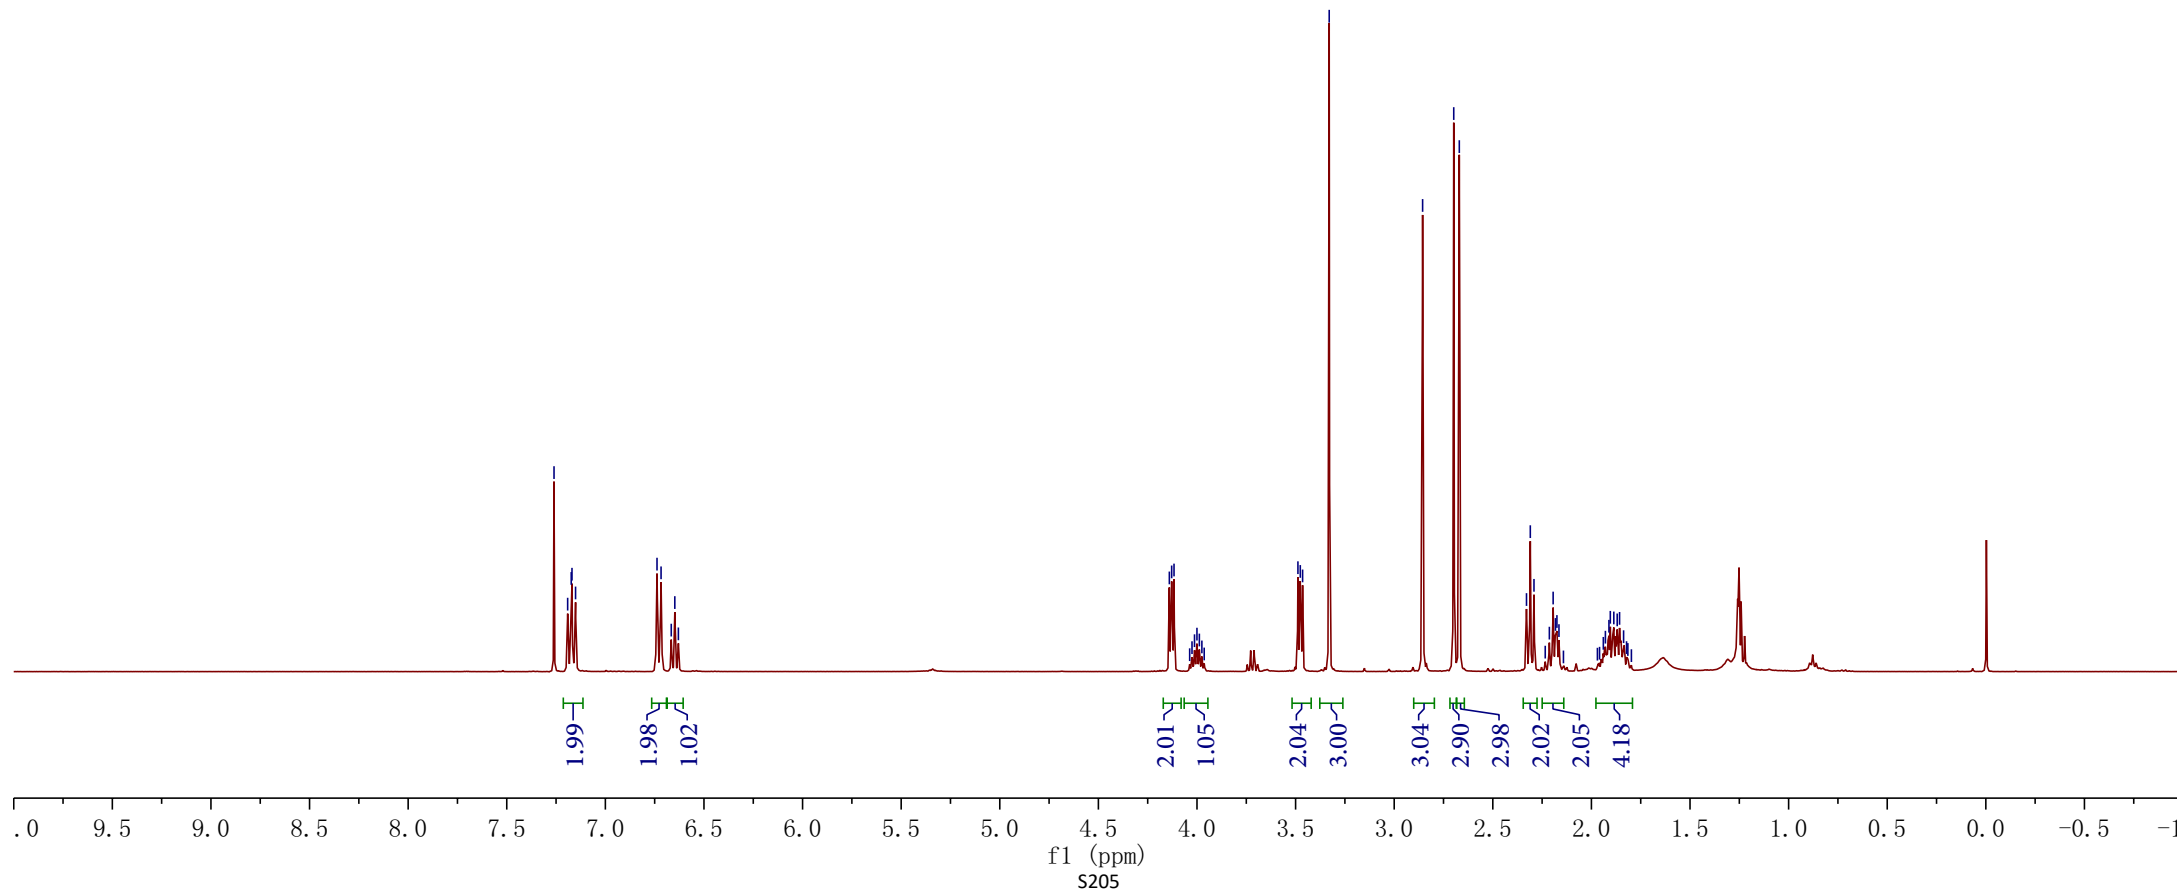

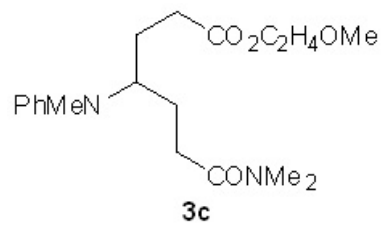

173.554

172.384

151.095

129.197

116.389

112.586

77.417

77.099

76.782

70.428

63.448

59.024

56.522

37.032

35.425

31.351

29.541

29.496

28.212

28.142

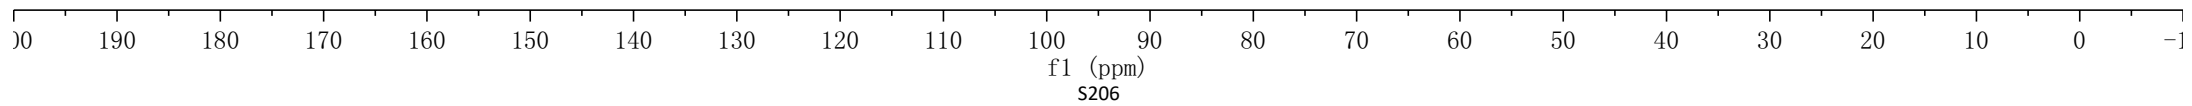

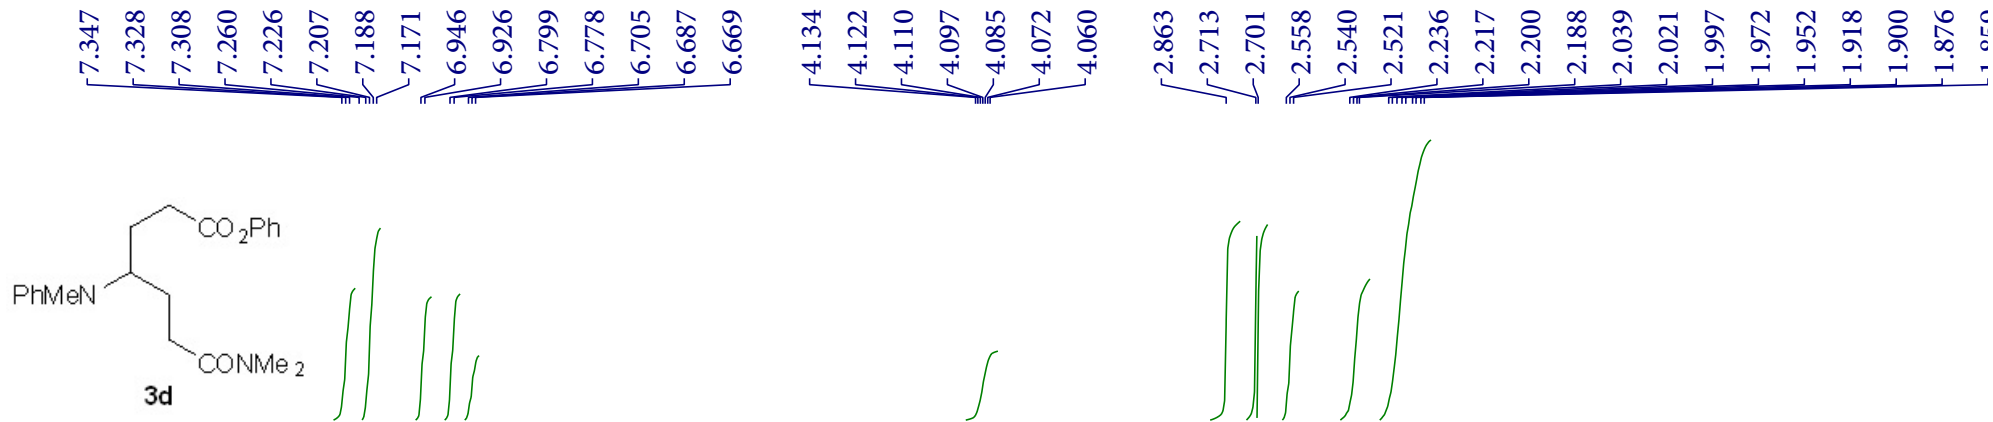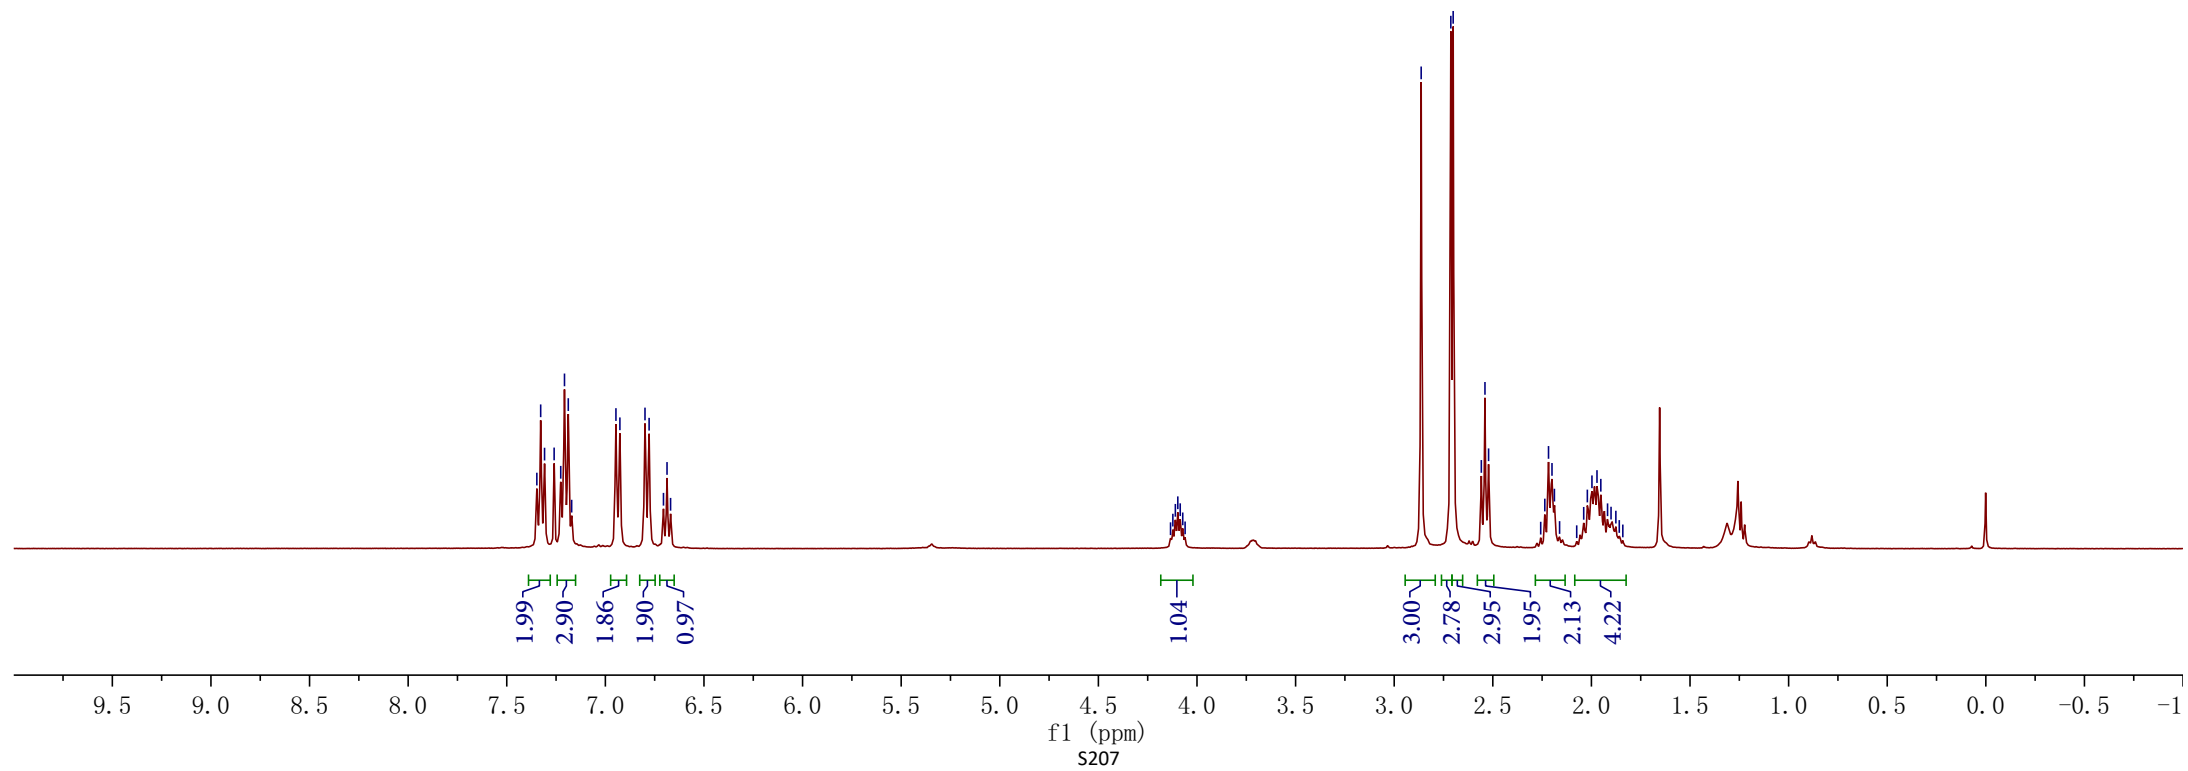

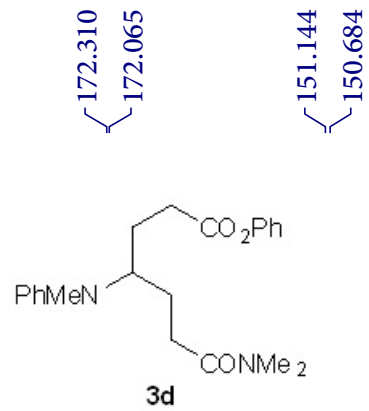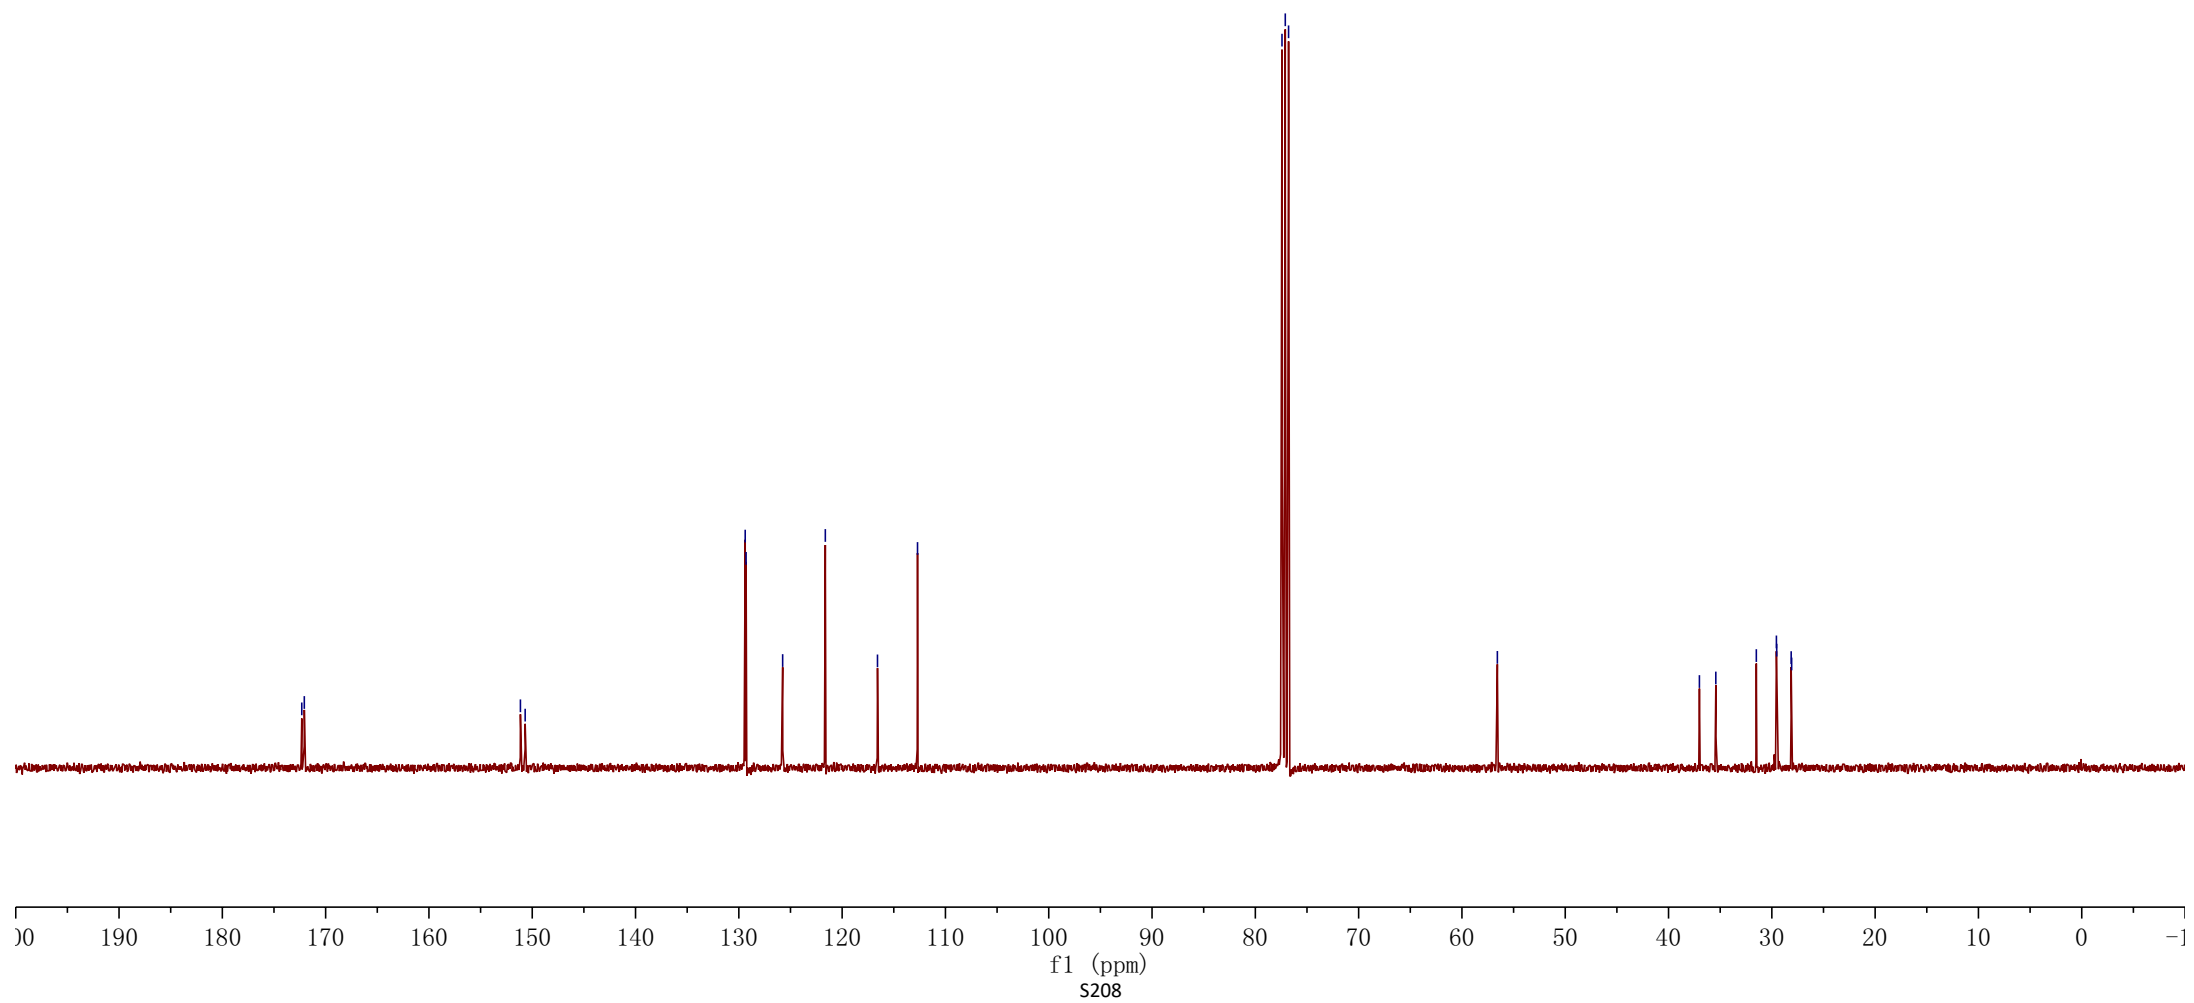



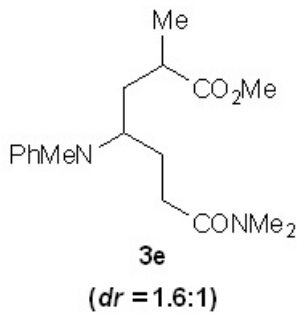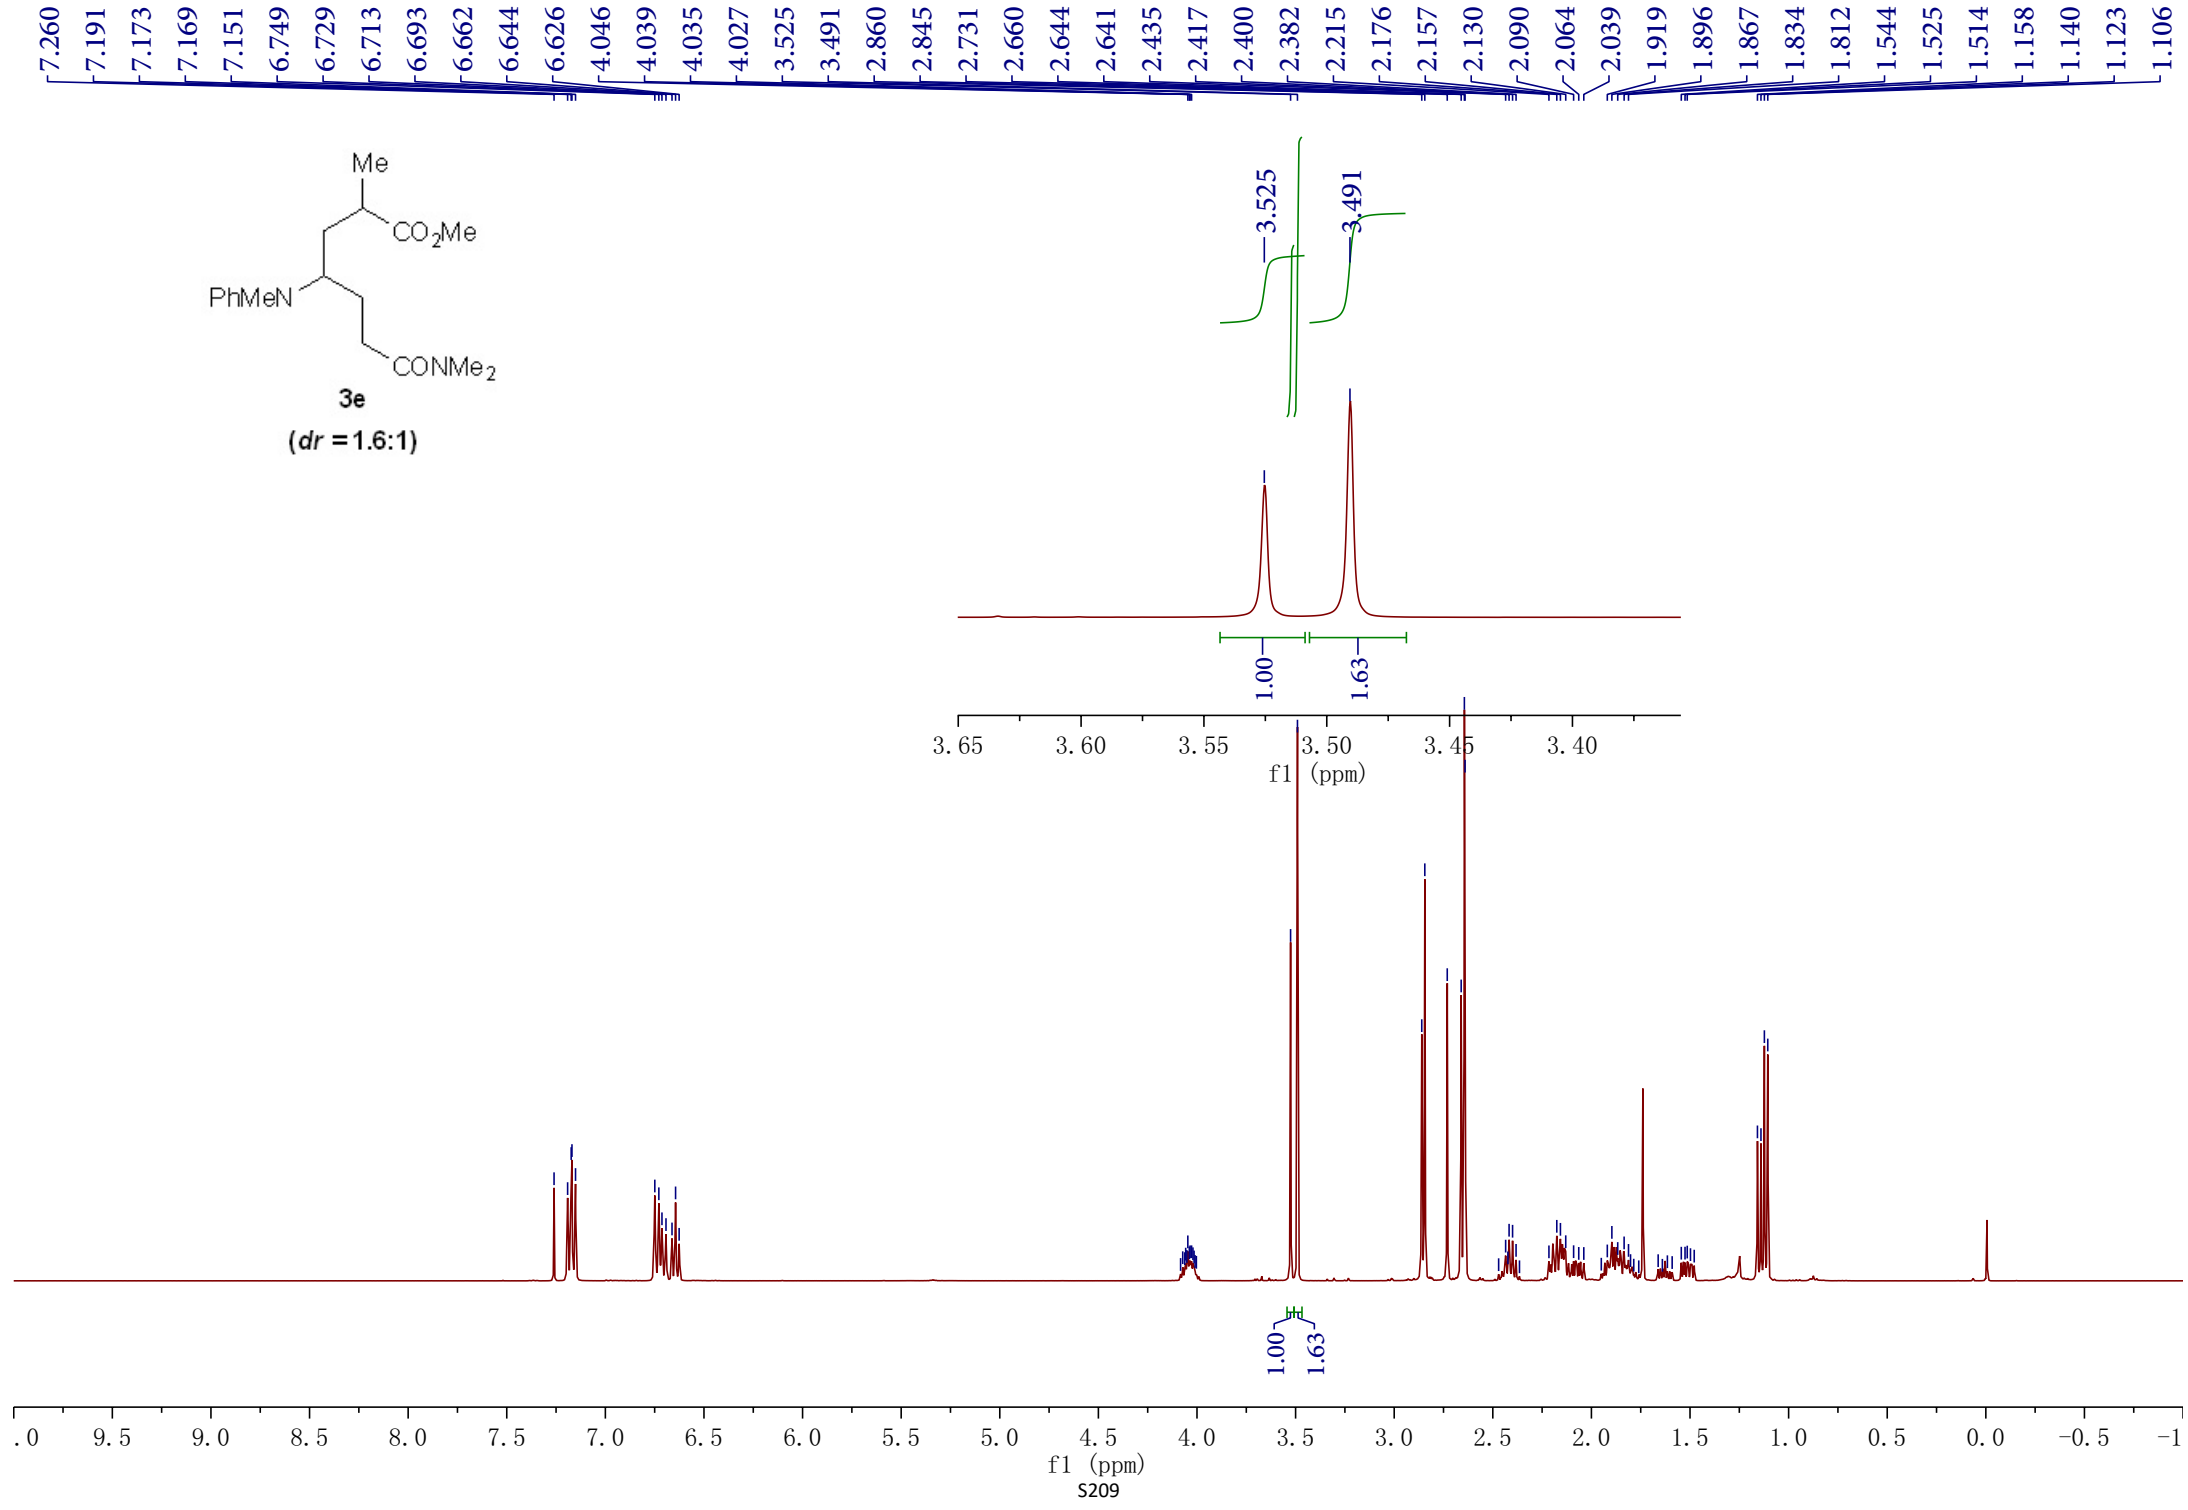

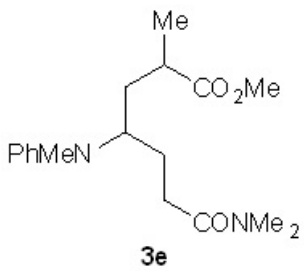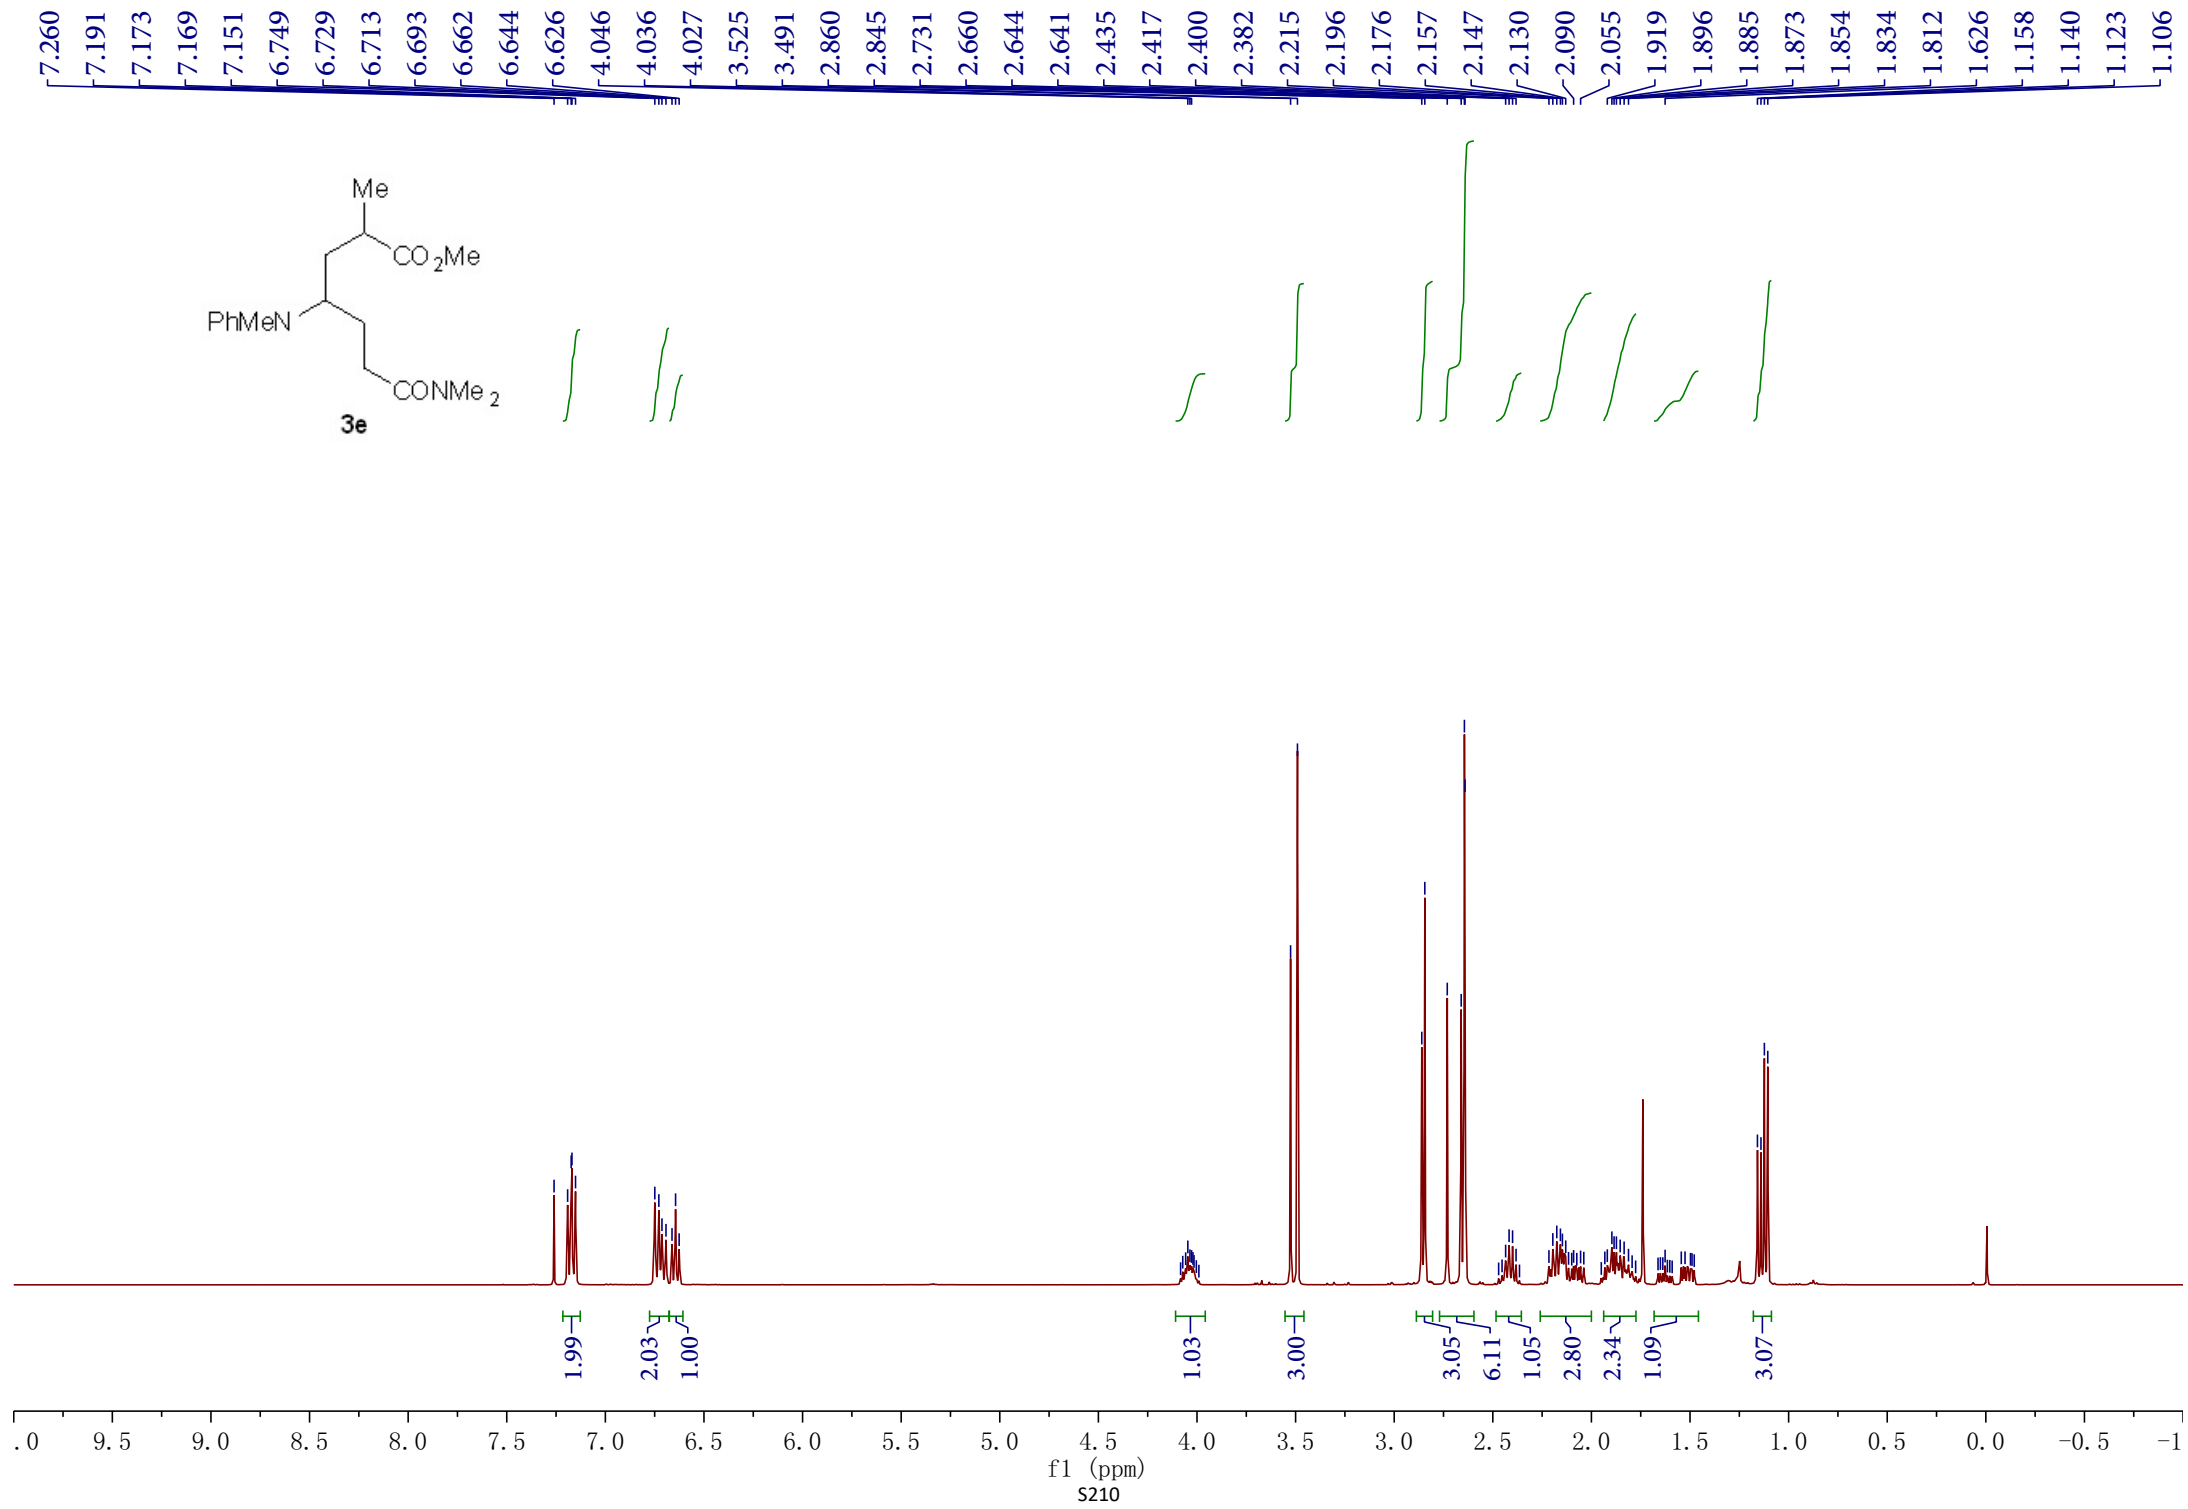

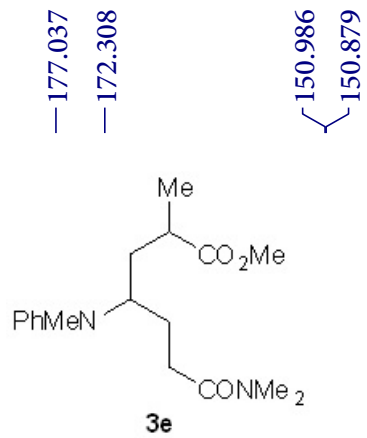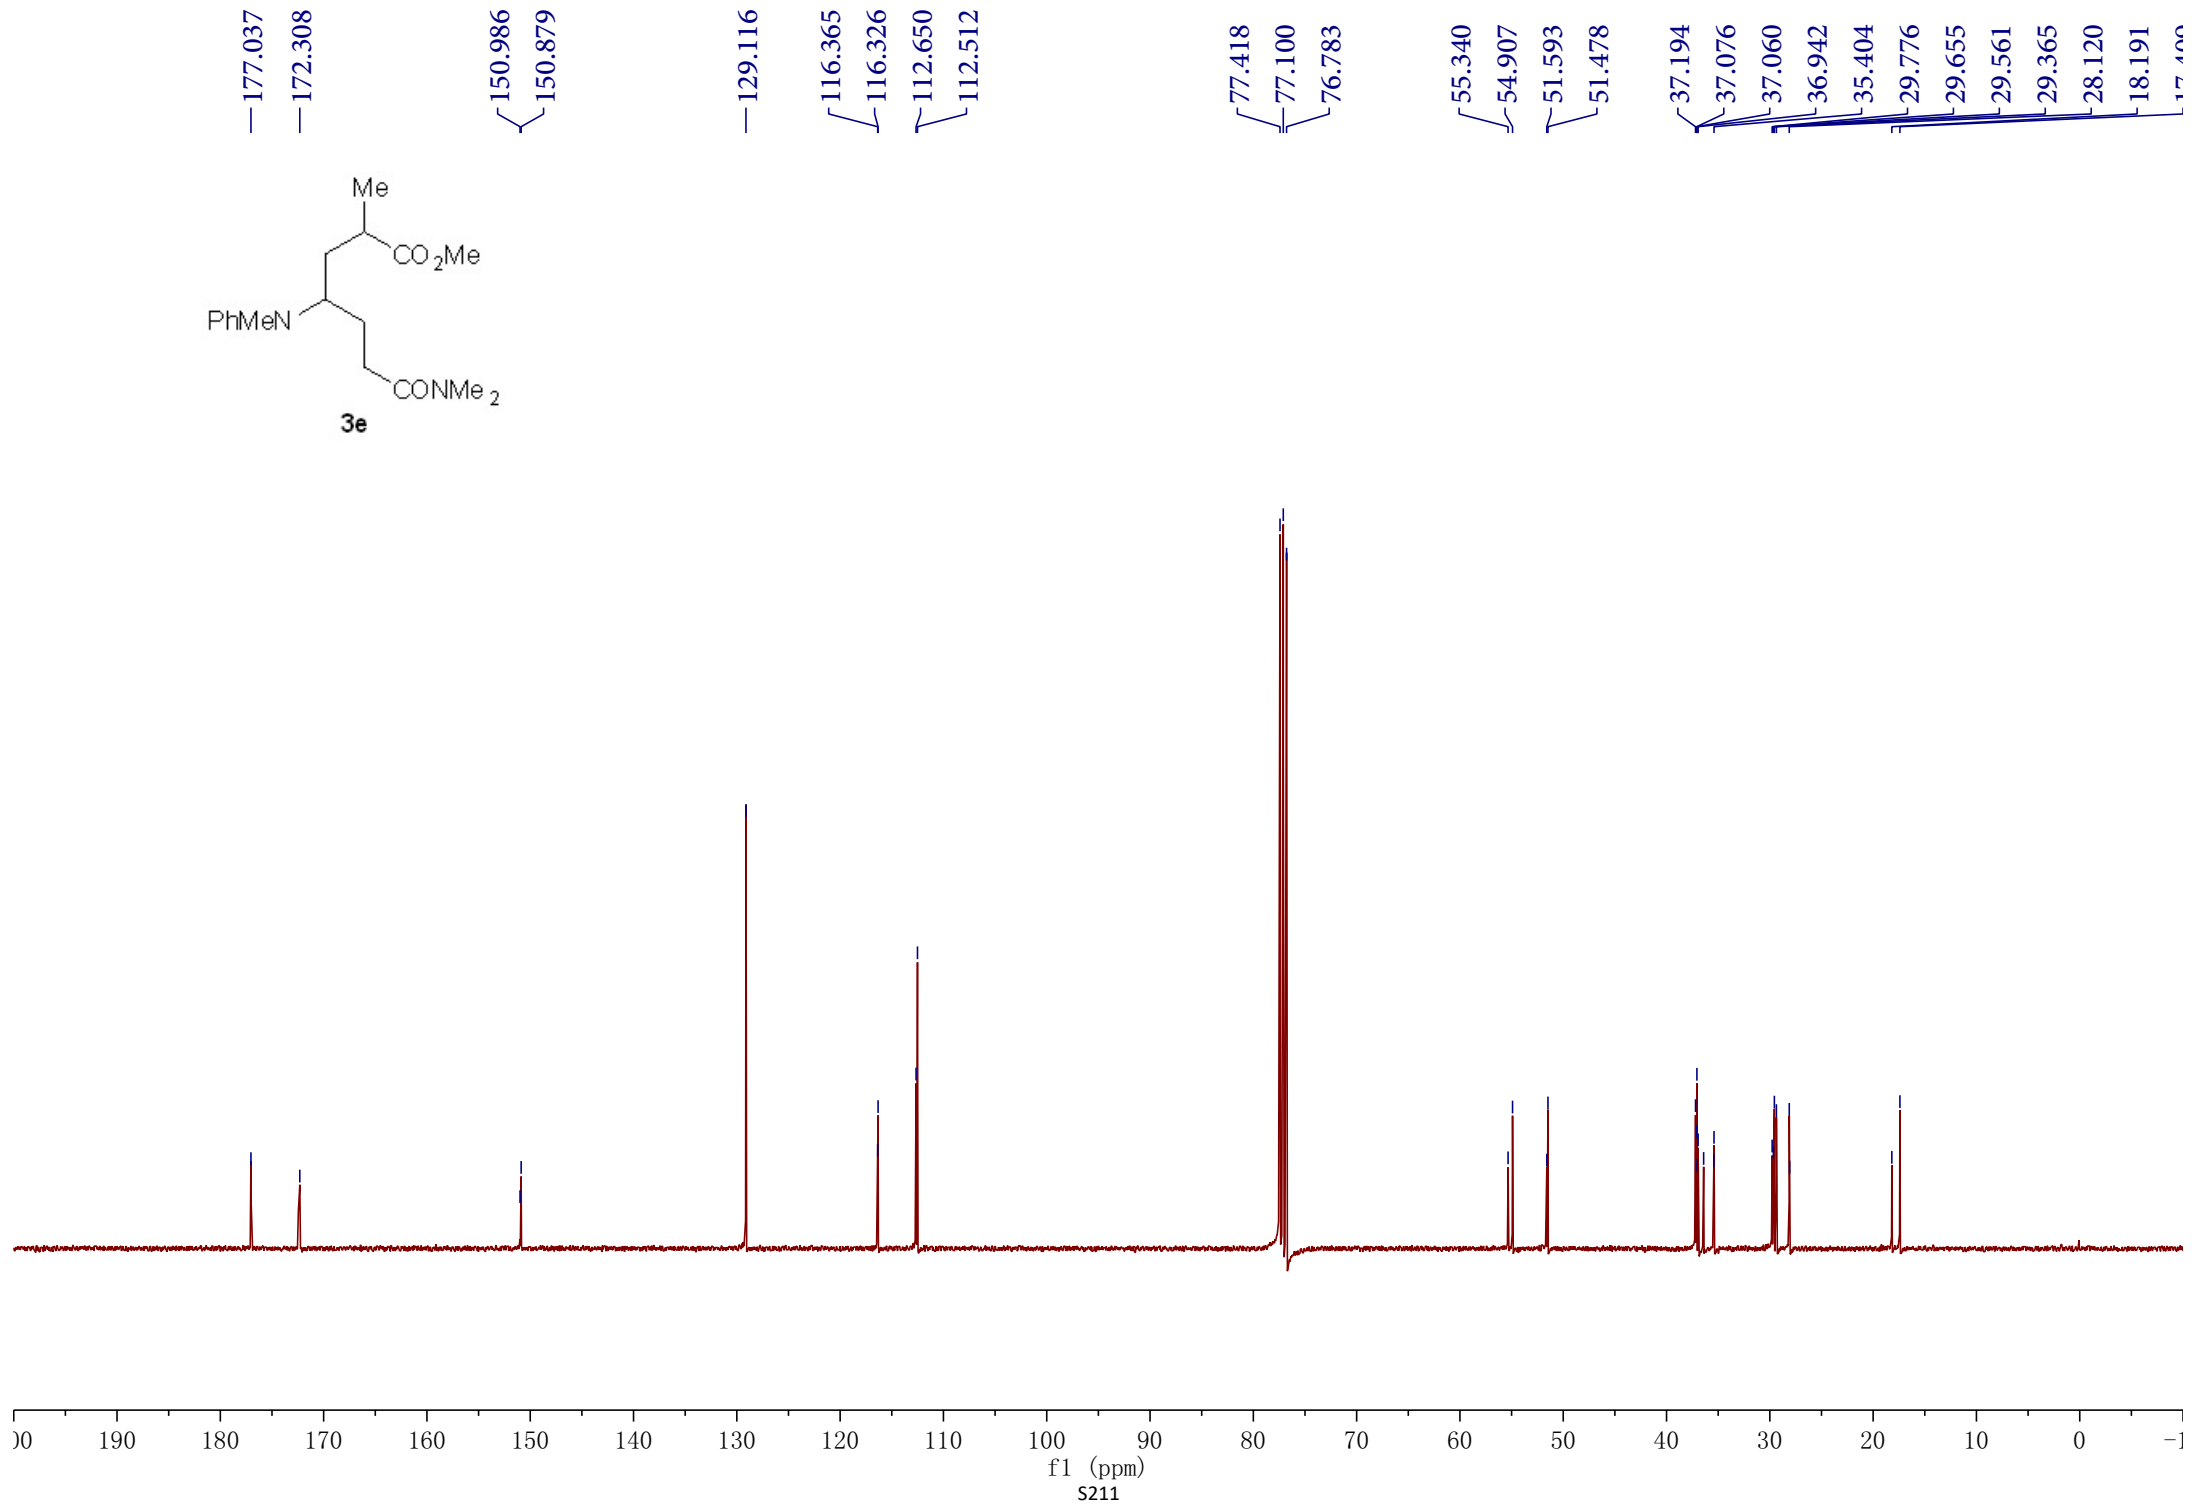

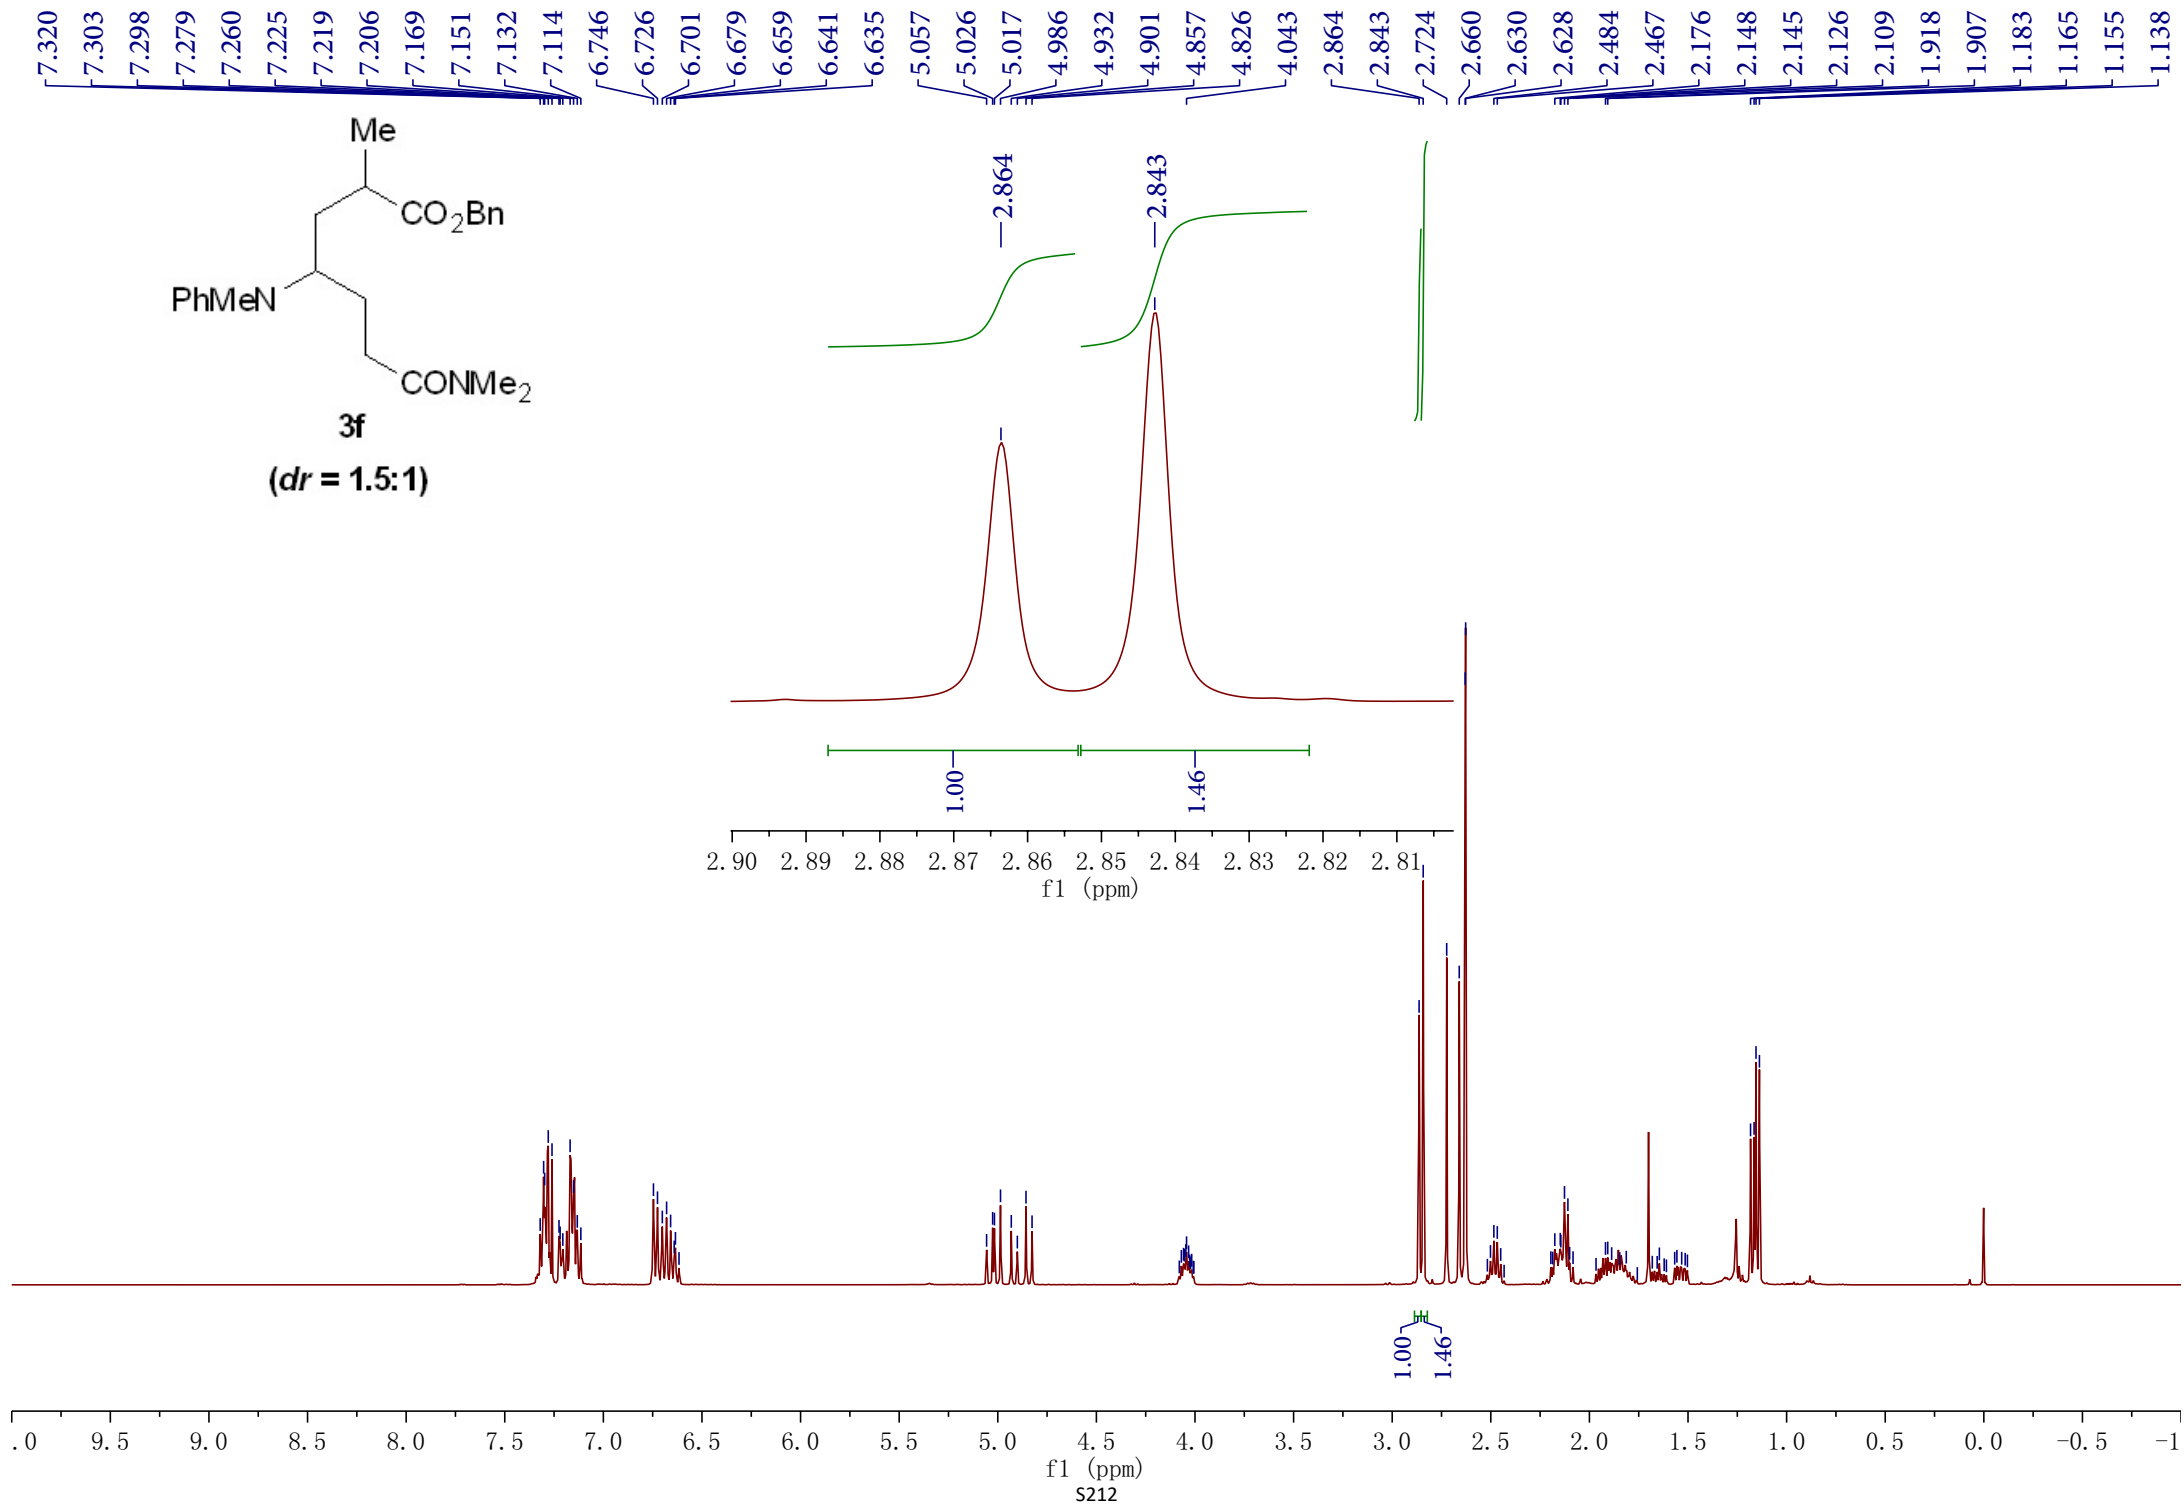

7.320 7.303 7.298 7.291 7.284 7.279 7.260 7.225 7.219 7.206 7.186 7.169 7.164 7.151 7.146 7.136 7.132 7.114 6.746 6.726 6.701 6.679 6.659 6.635 5.026 5.017 4.986 4.931 4.857 4.826 2.864 2.843 2.724 2.660 2.630 2.628 2.484 2.467 2.176 2.148 2.126 2.109 1.853 1.183 1.165 1.155 1.138

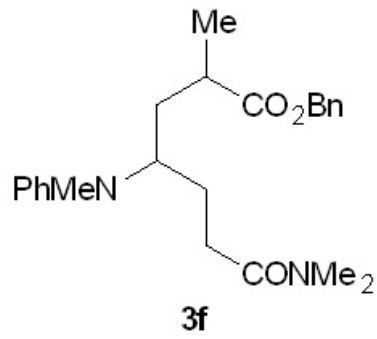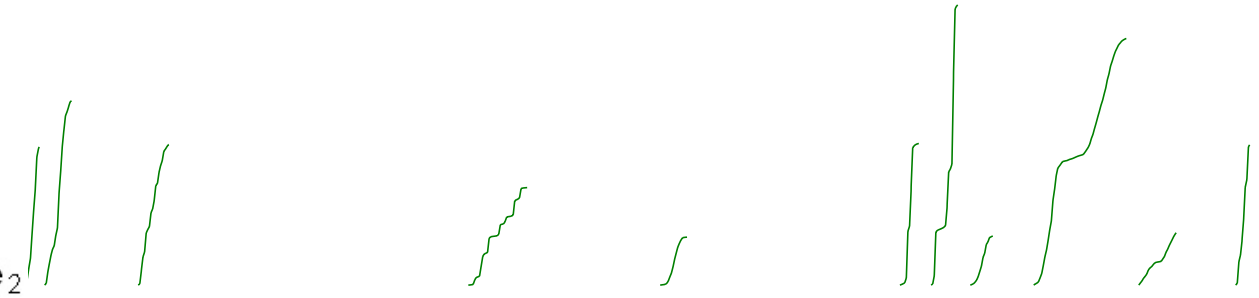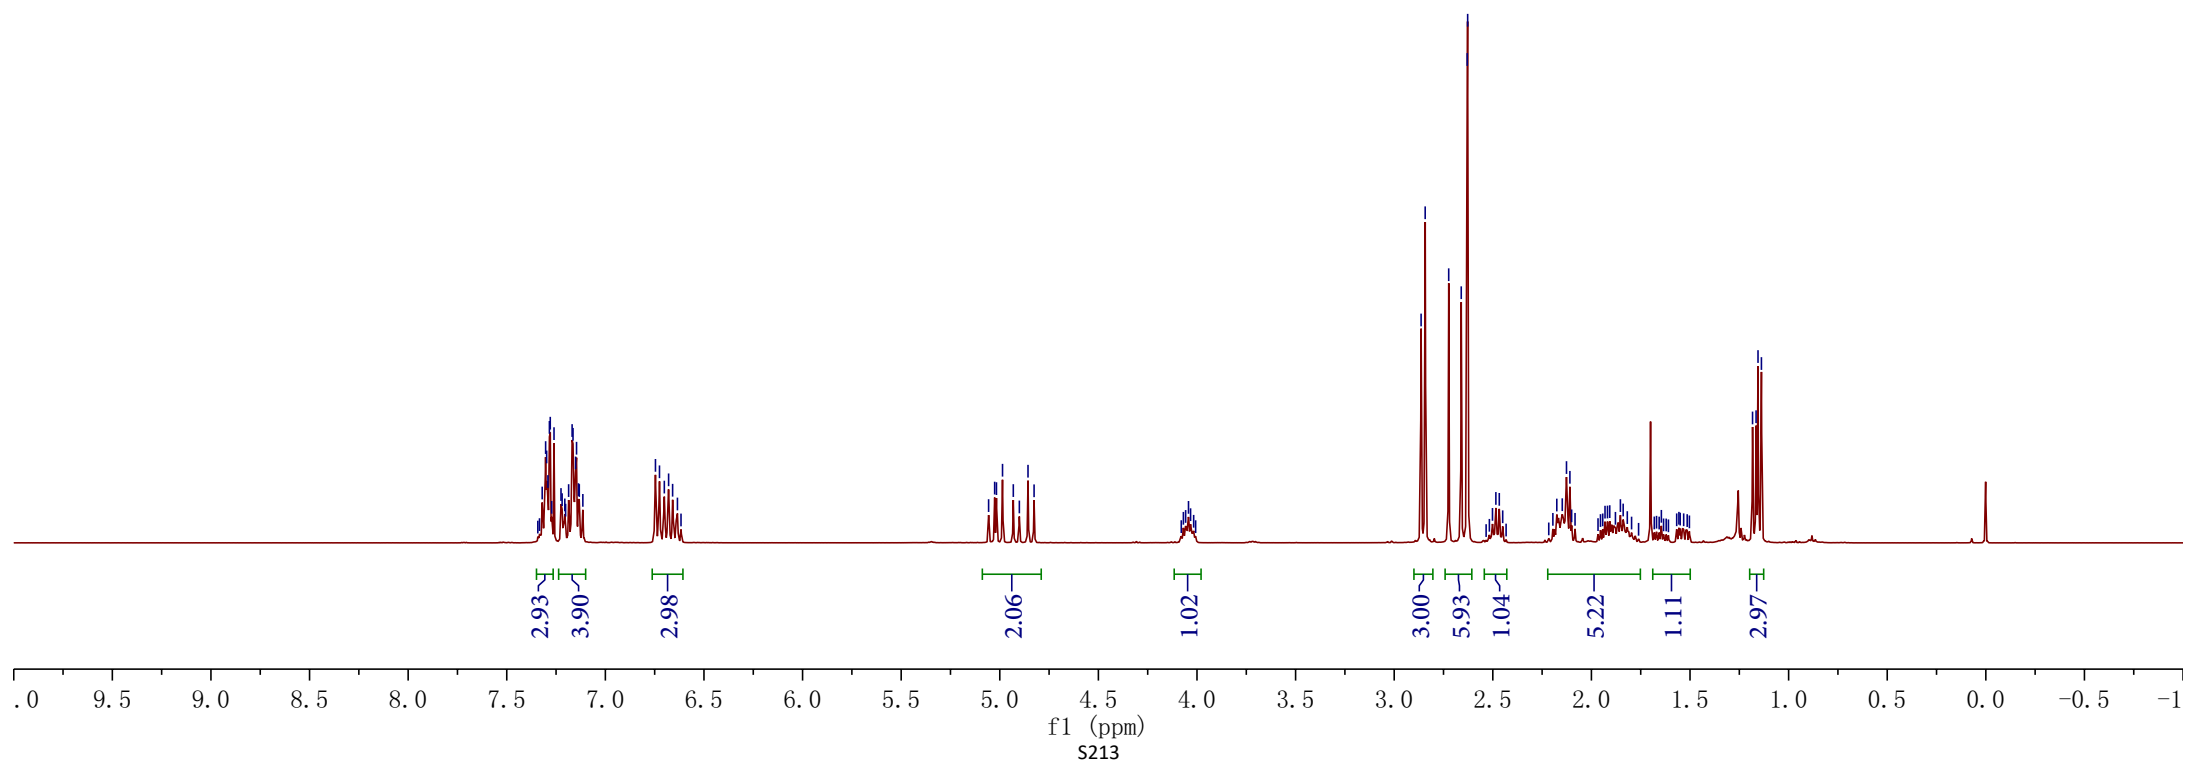

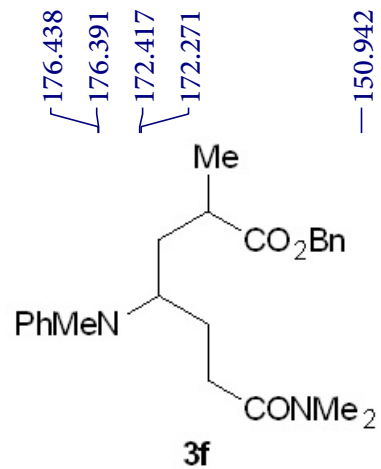

- 176.438
- 176.391
- 172.417
- 172.271
- 150.942
- 136.076
- 129.185
- 129.156
- 128.512
- 128.483
- 128.289
- 128.177
- 128.124
- 128.065
- 116.407
- 116.377
- 112.625
- 112.595
- 77.418
- 77.100
- 76.783
- 66.283
- 66.180
- 55.335
- 55.197
- 37.310
- 37.162
- 36.954
- 36.912
- 36.483
- 35.394
- 29.816
- 29.686
- 29.634
- 29.349
- 28.074
- 18.280
- 17.200

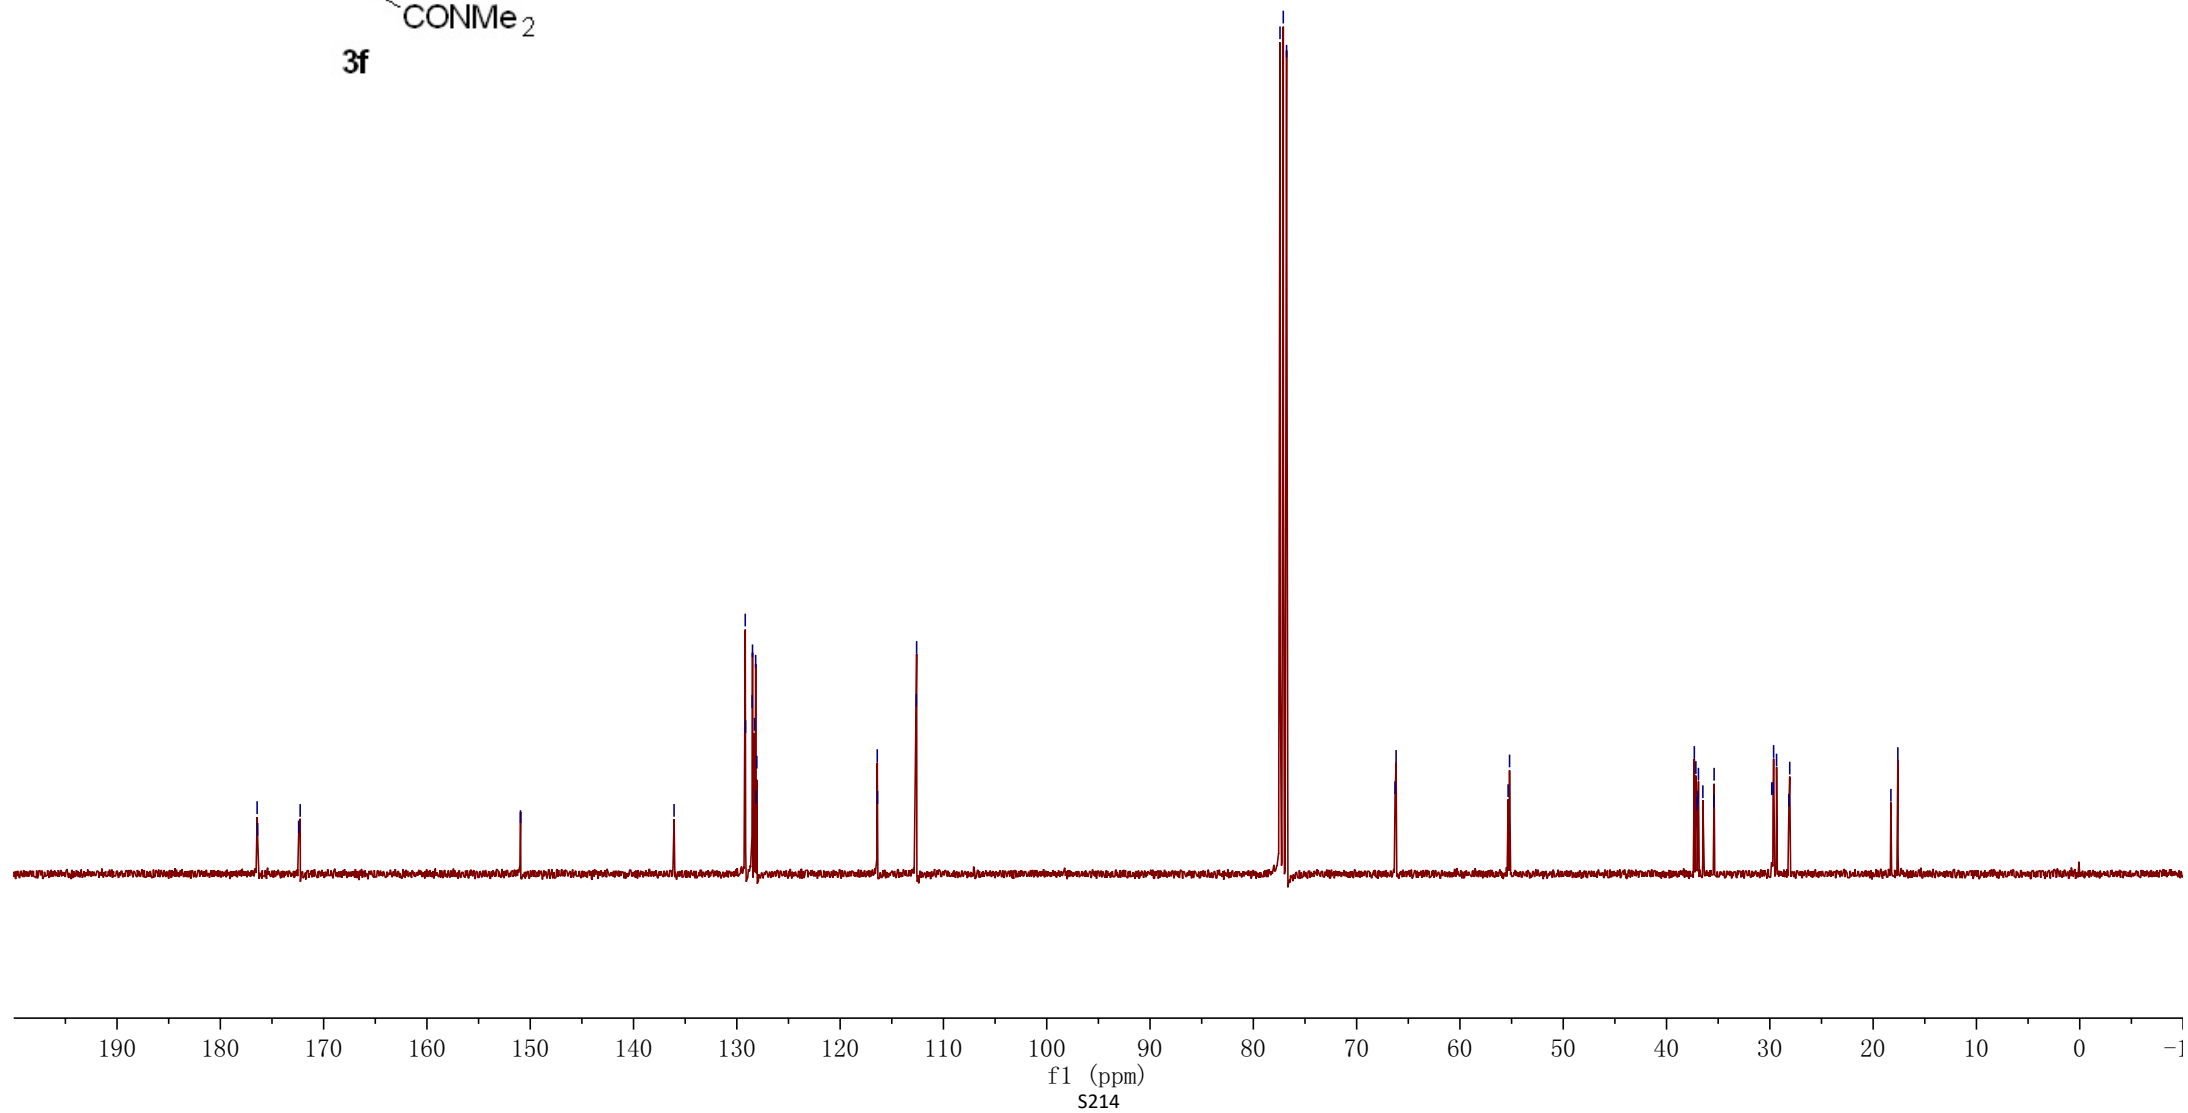

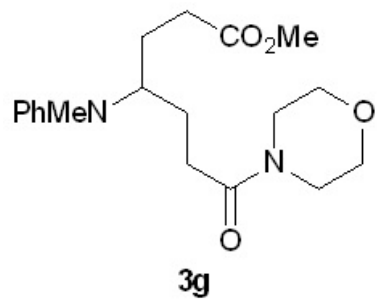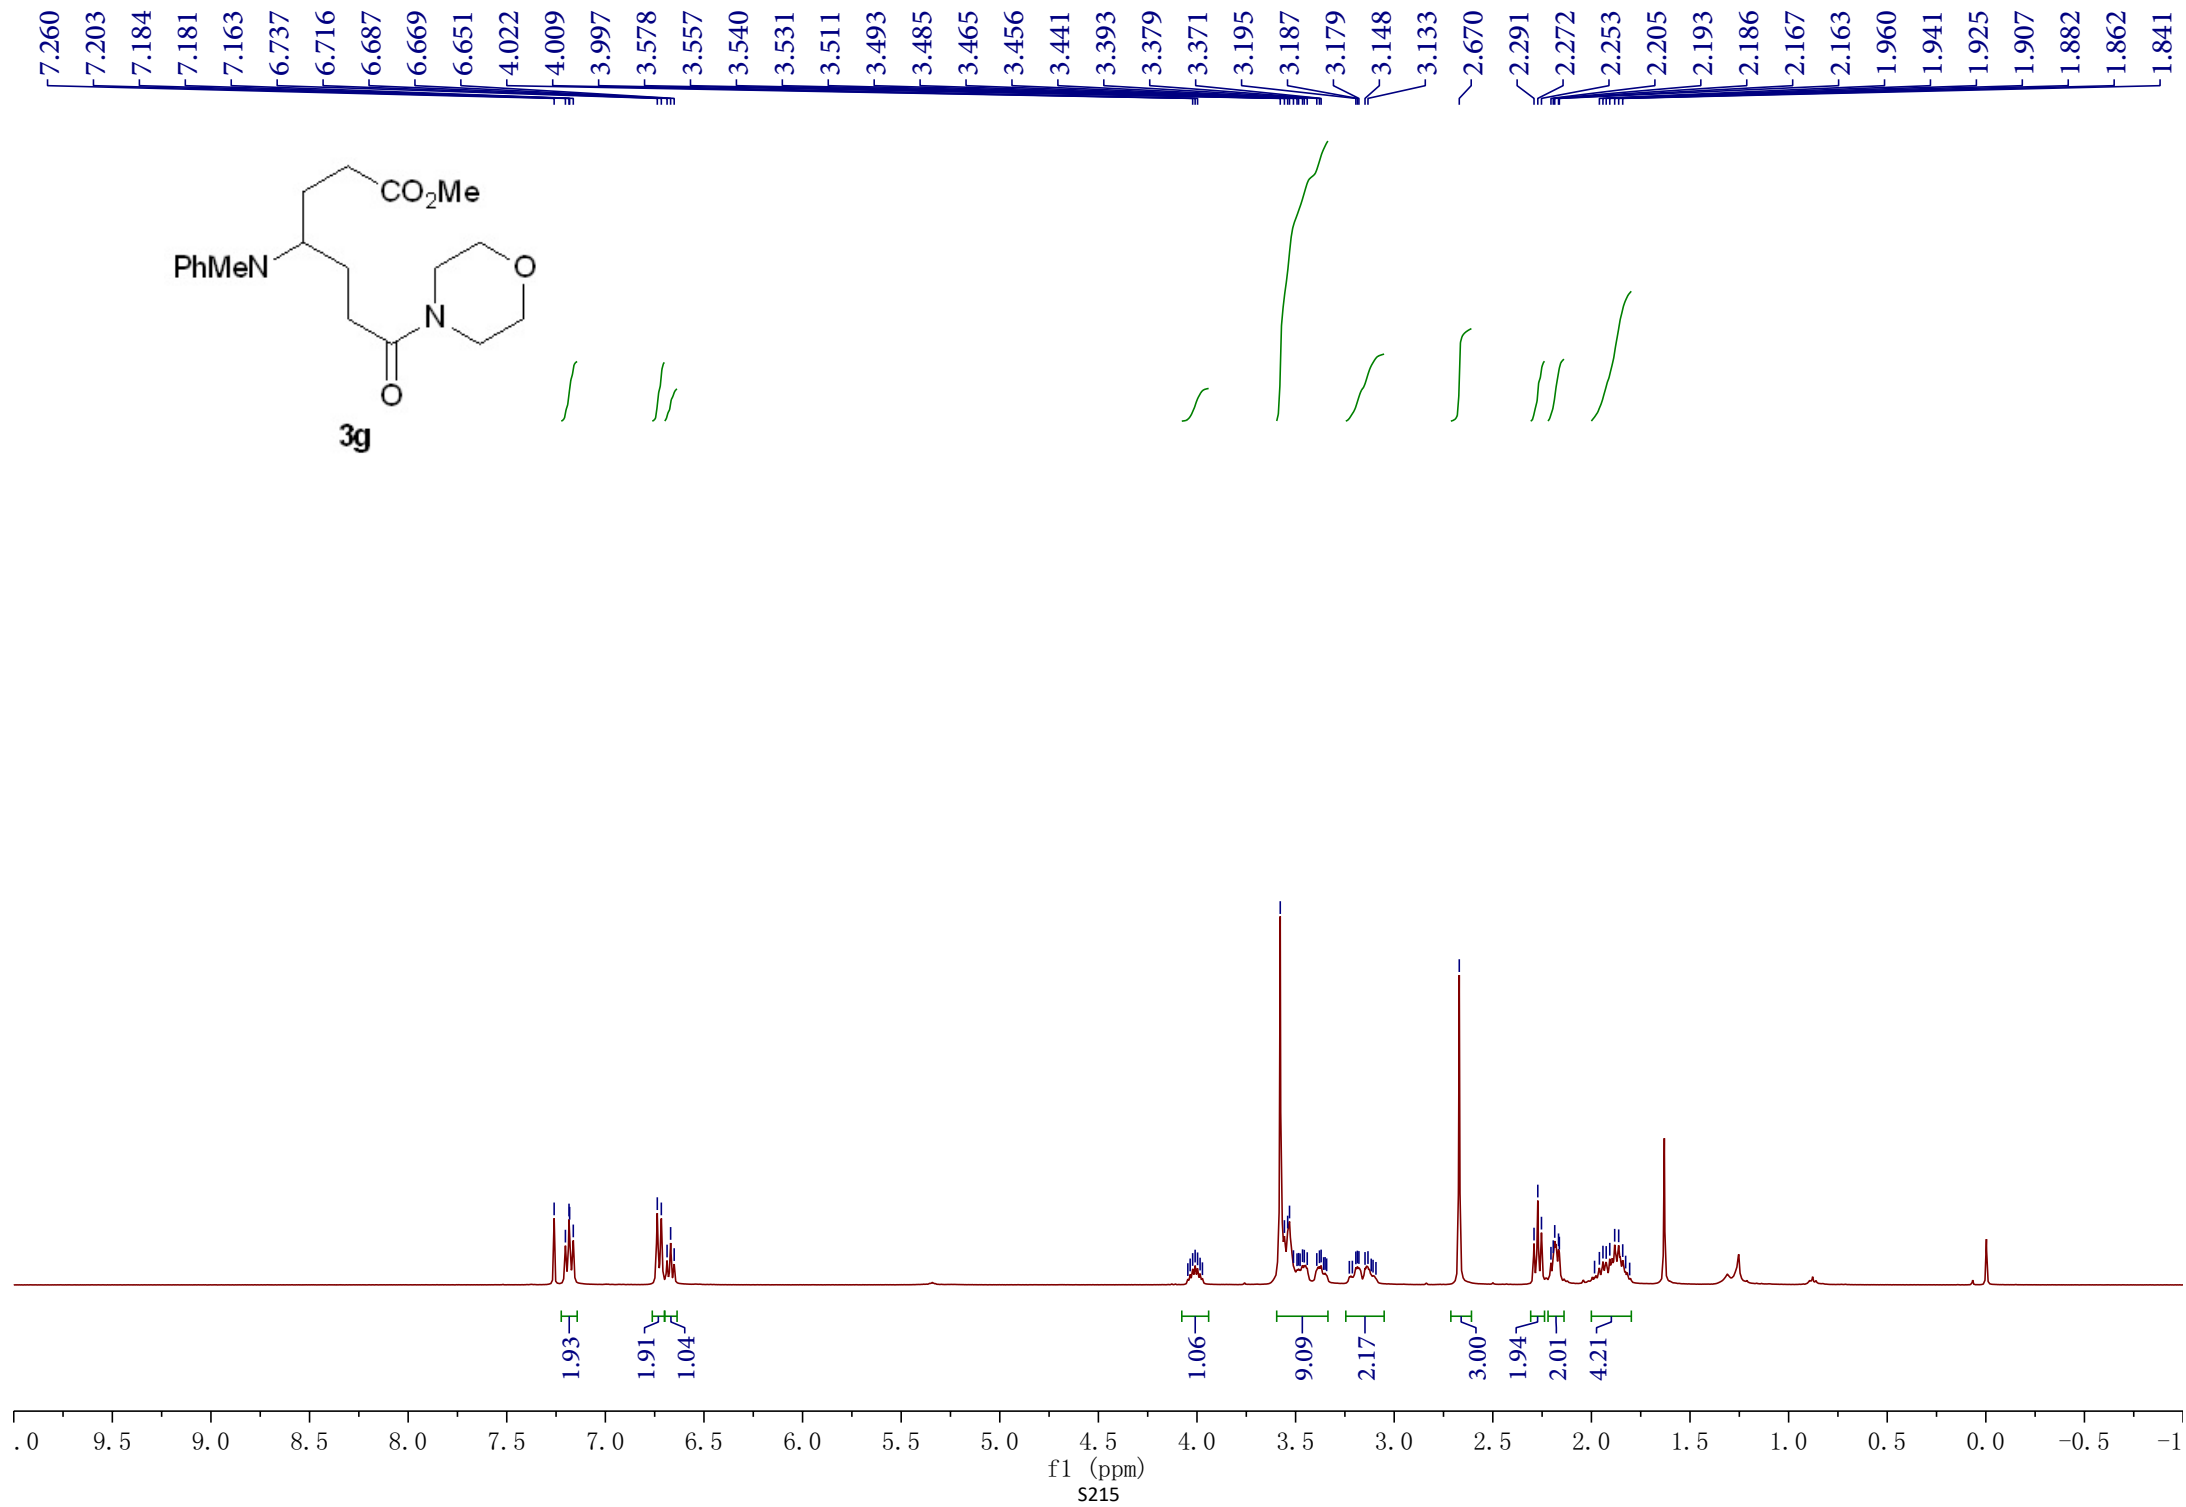

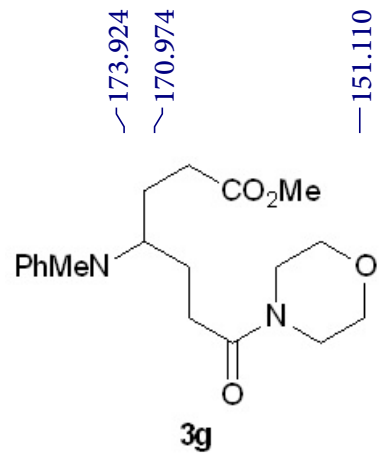

173.924

170.974

151.110

129.323

116.620

112.626

77.418

77.100

76.783

66.838

66.418

56.492

51.563

45.685

41.970

31.201

29.538

29.128

28.281

27.949

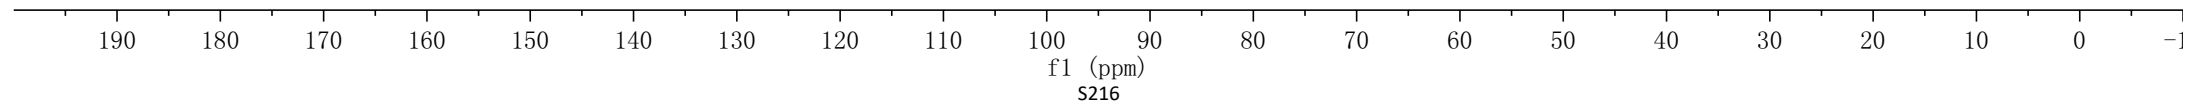



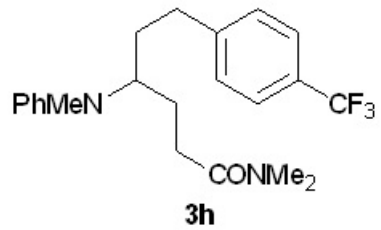

7.487  
7.467  
7.260  
7.201  
7.194  
7.180  
7.174  
7.162  
6.704  
6.684  
6.669  
6.651

3.997  
3.985  
3.973  
3.960  
3.948  
3.936  
3.924

2.872  
2.725  
2.706  
2.634  
2.627  
2.609  
2.596  
2.587  
2.238  
2.219  
2.209  
2.199  
2.192  
1.898  
1.876  
1.861  
1.843

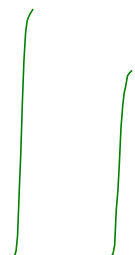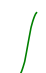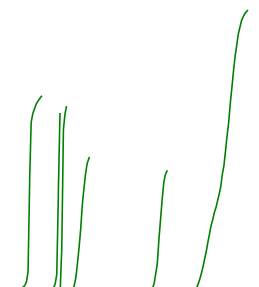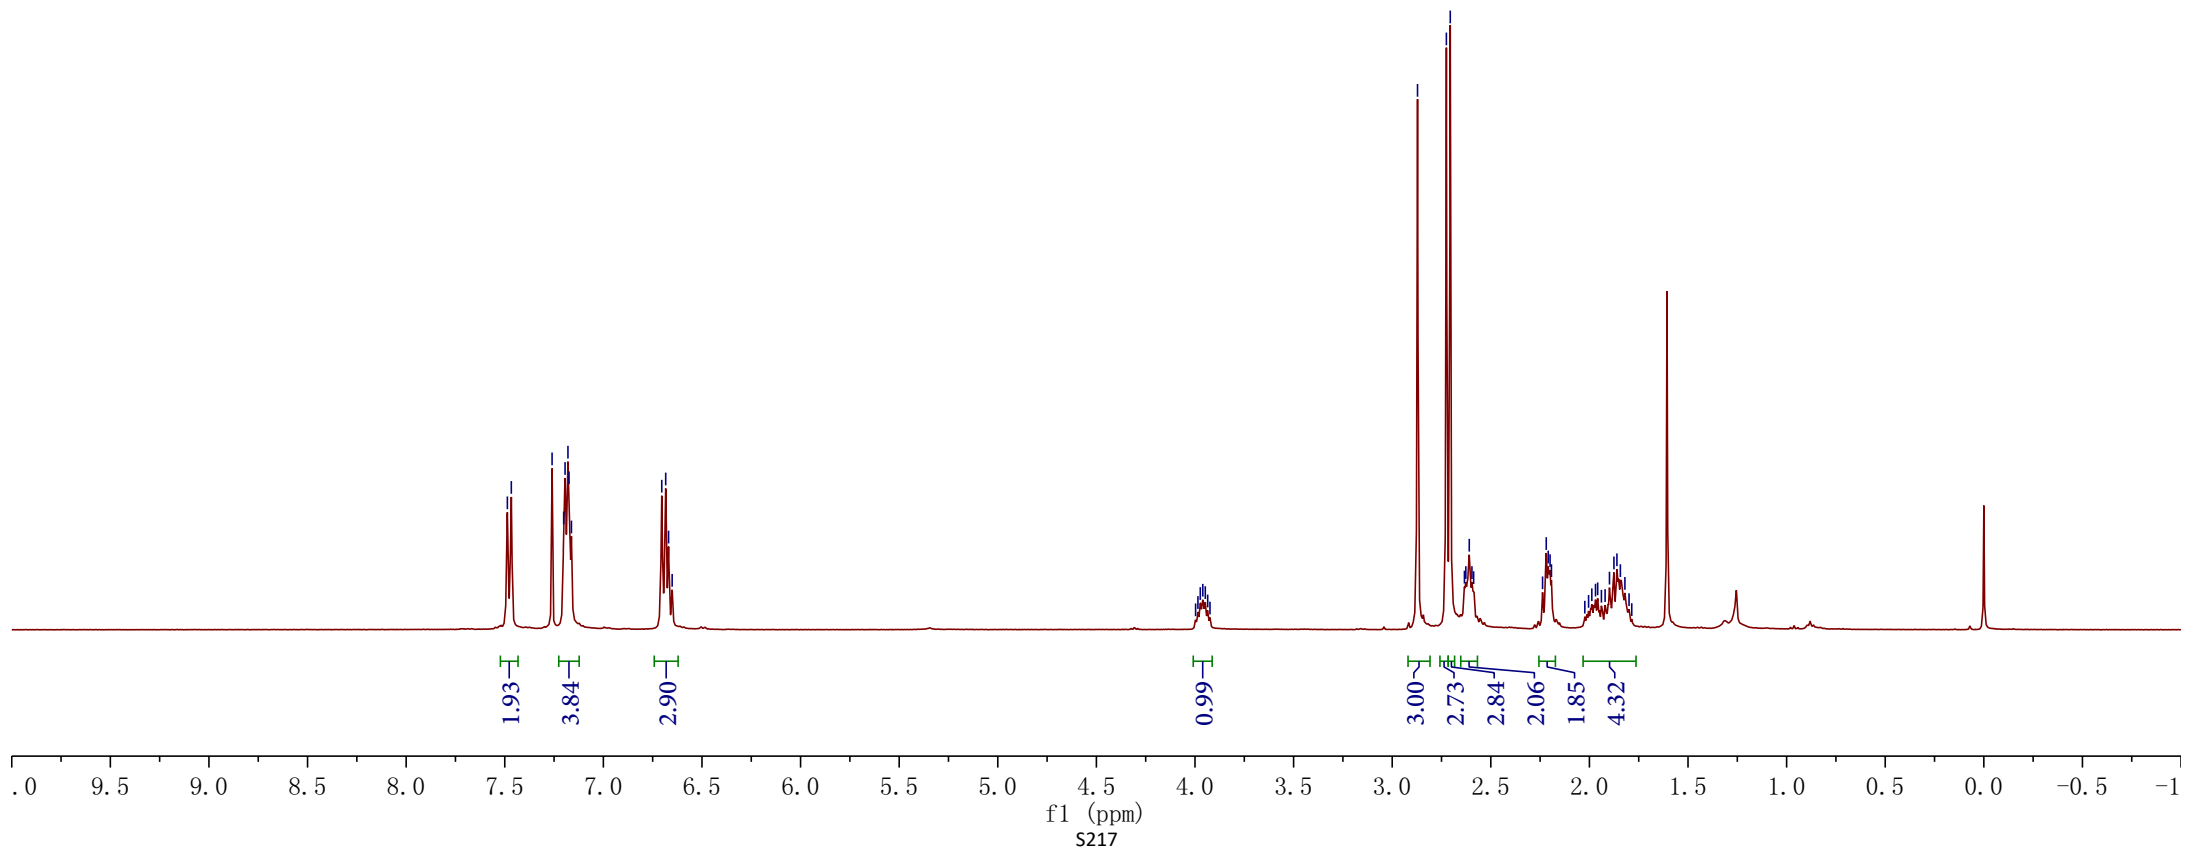

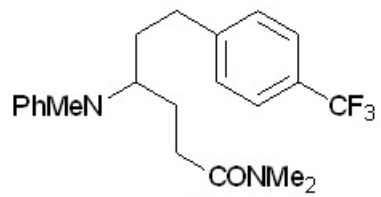

**3h**

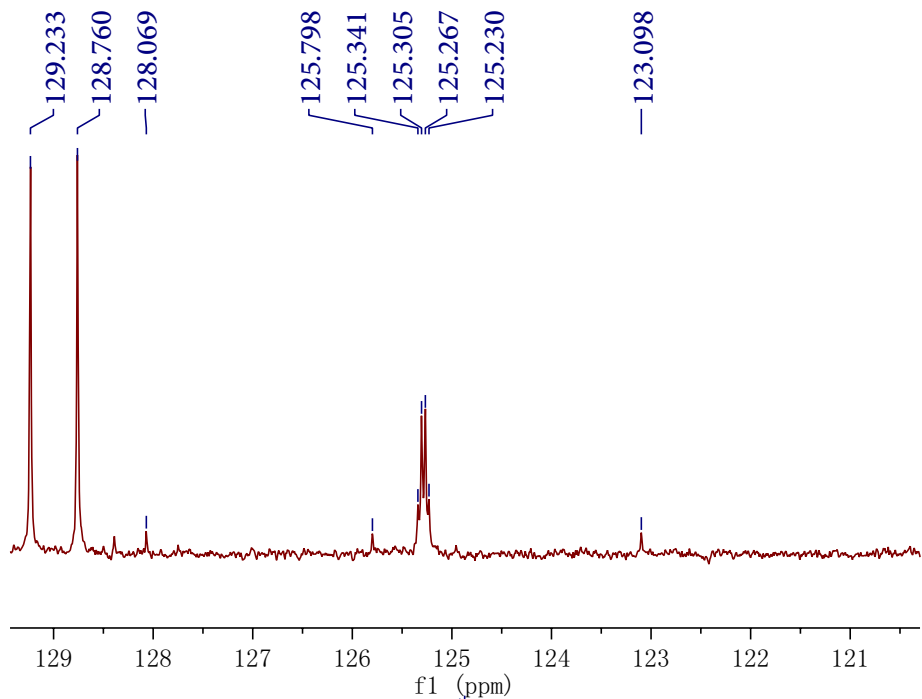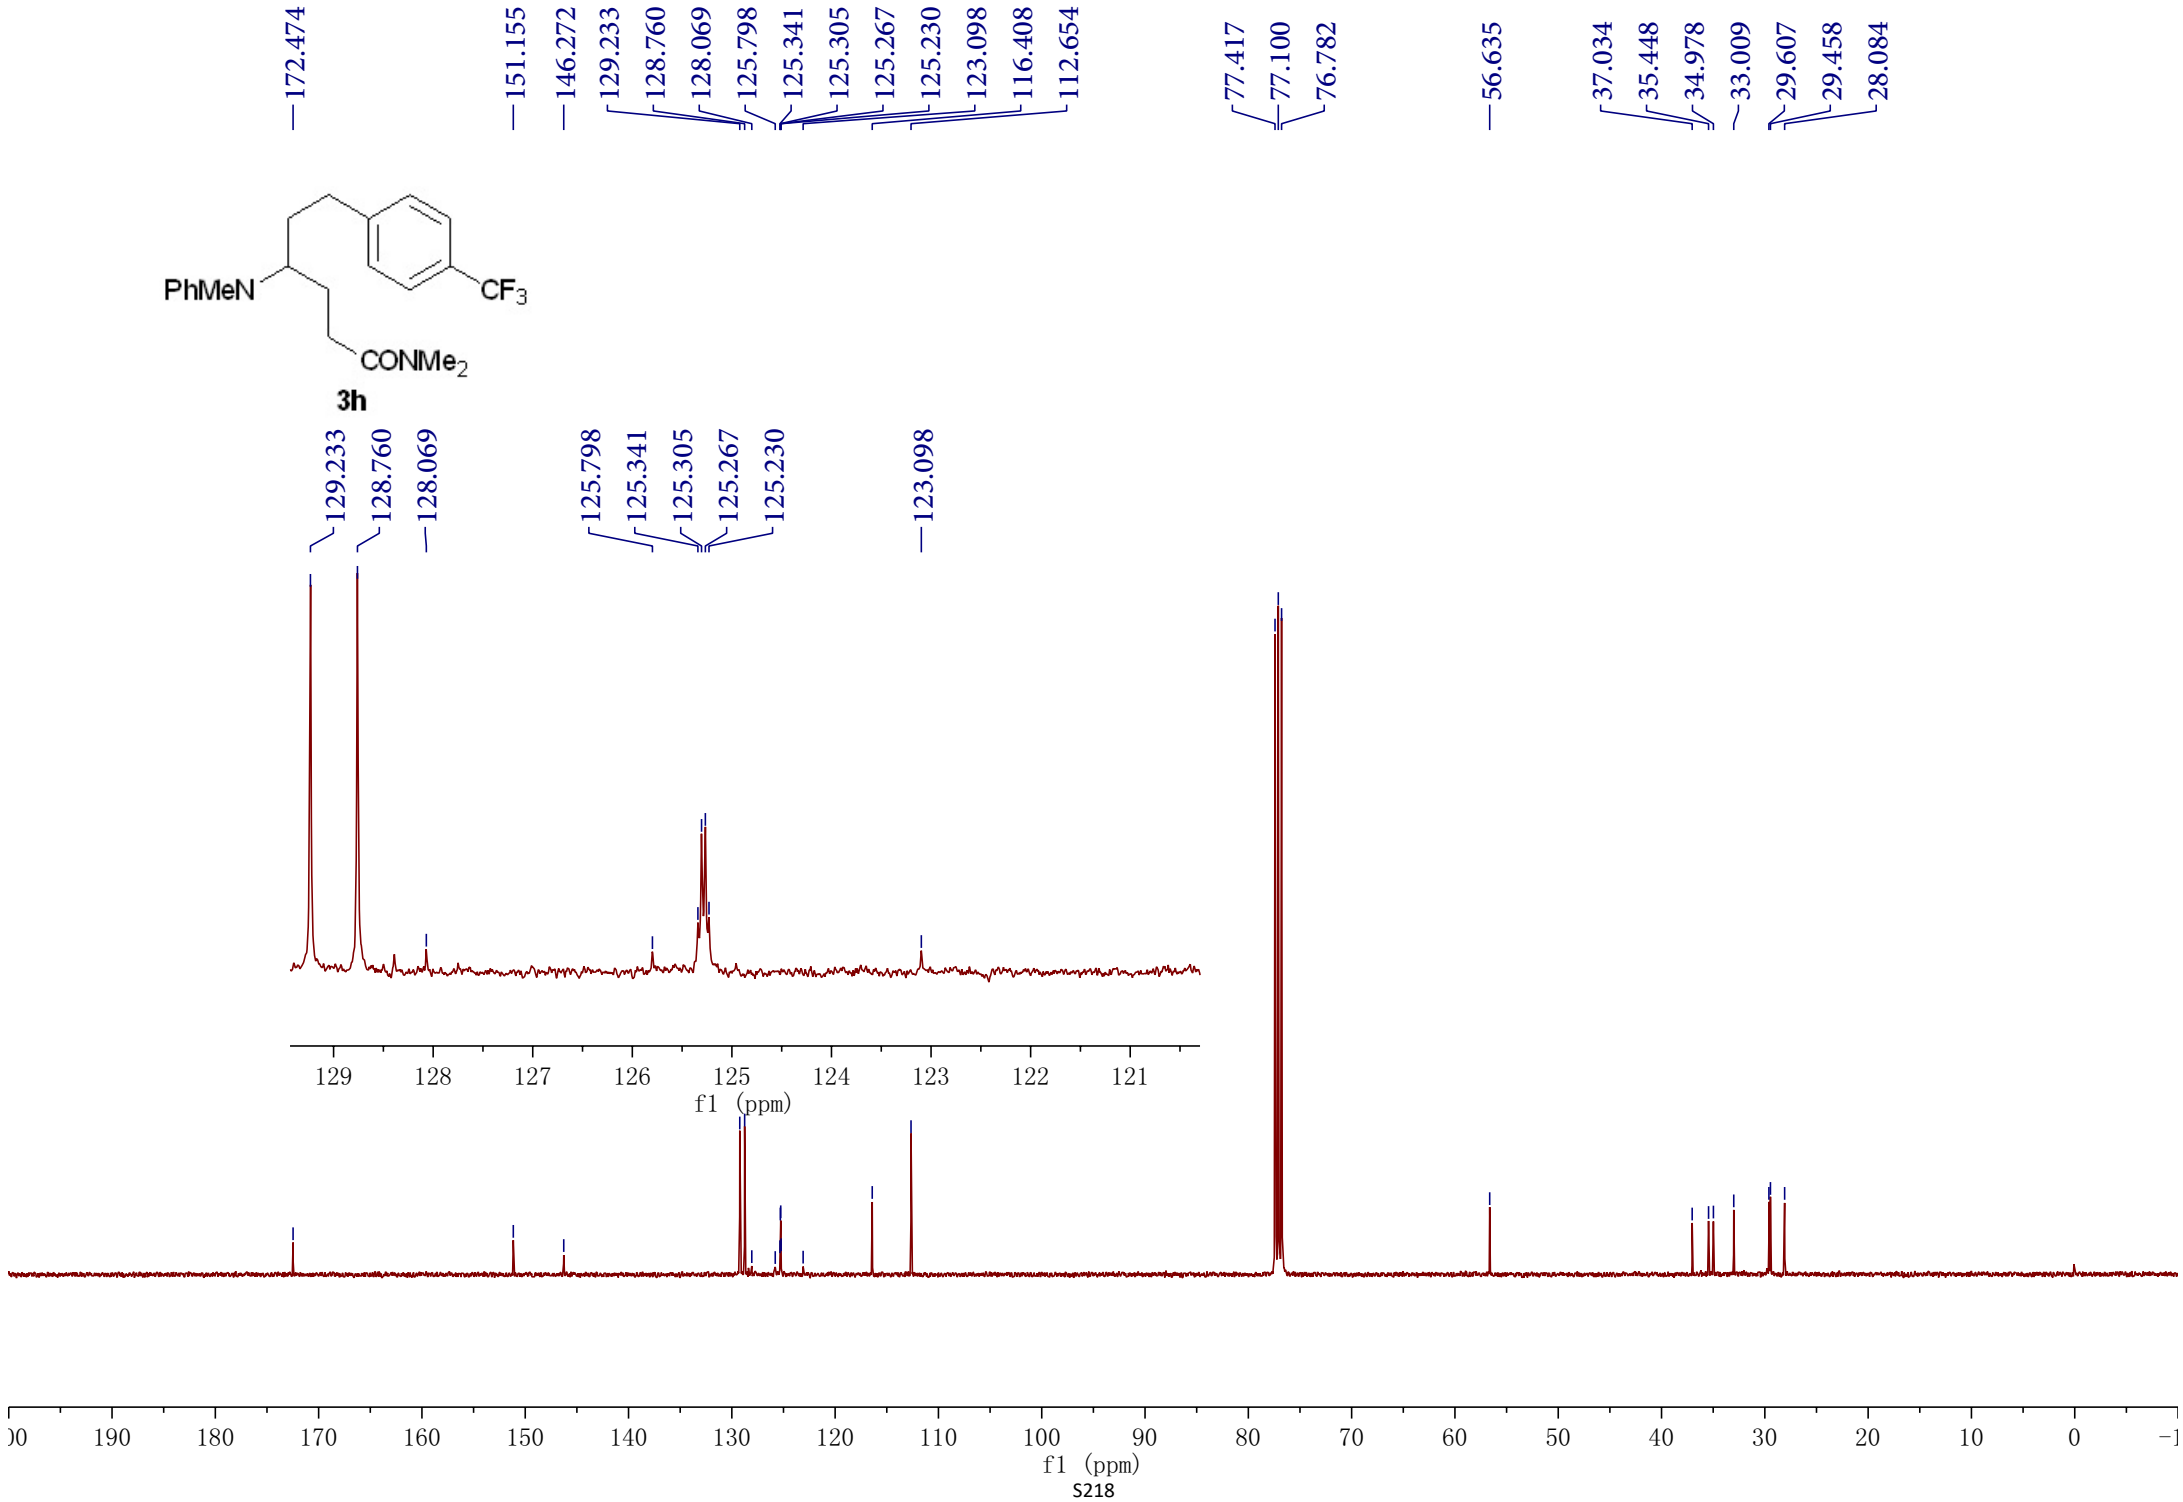

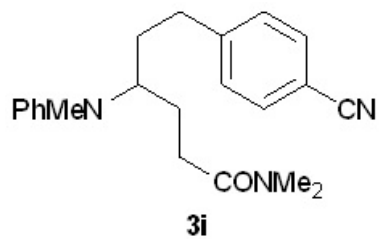

7.513  
7.493  
7.260  
7.196  
7.173  
7.156  
7.152  
6.688  
6.669  
6.652

3.987  
3.976  
3.964  
3.951  
3.938  
3.926  
3.914

2.866  
2.707  
2.696  
2.636  
2.622  
2.613  
2.605  
2.585  
2.230  
2.213  
2.197  
2.184  
1.952  
1.893  
1.869  
1.852  
1.837  
1.817

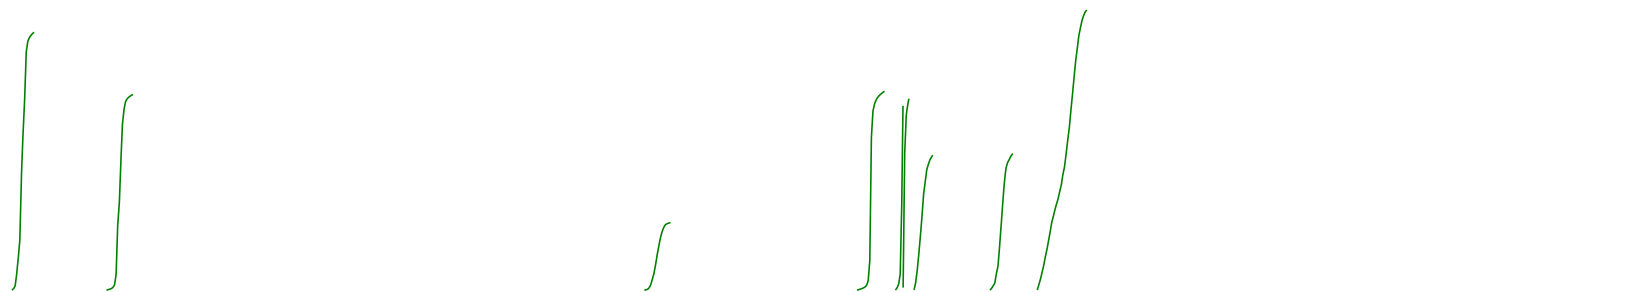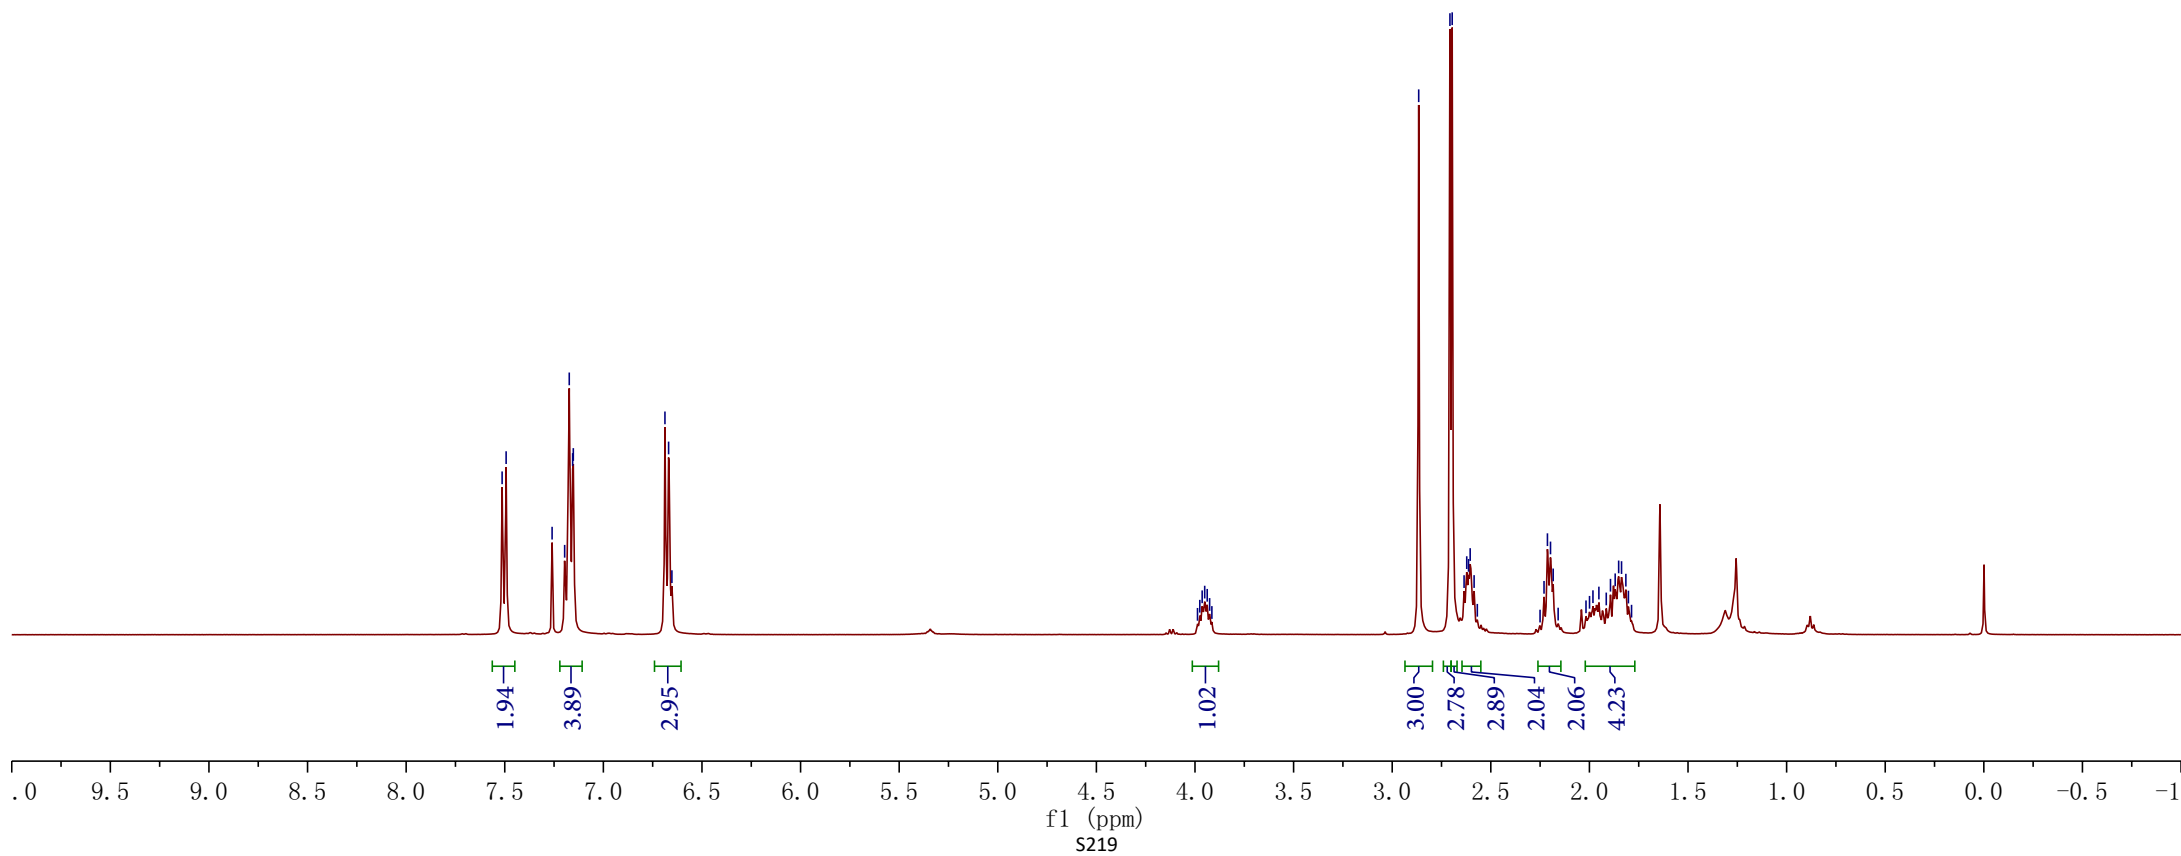

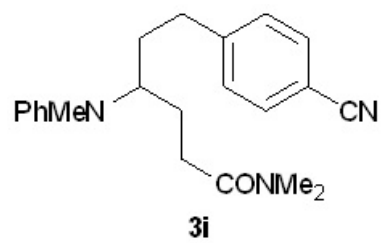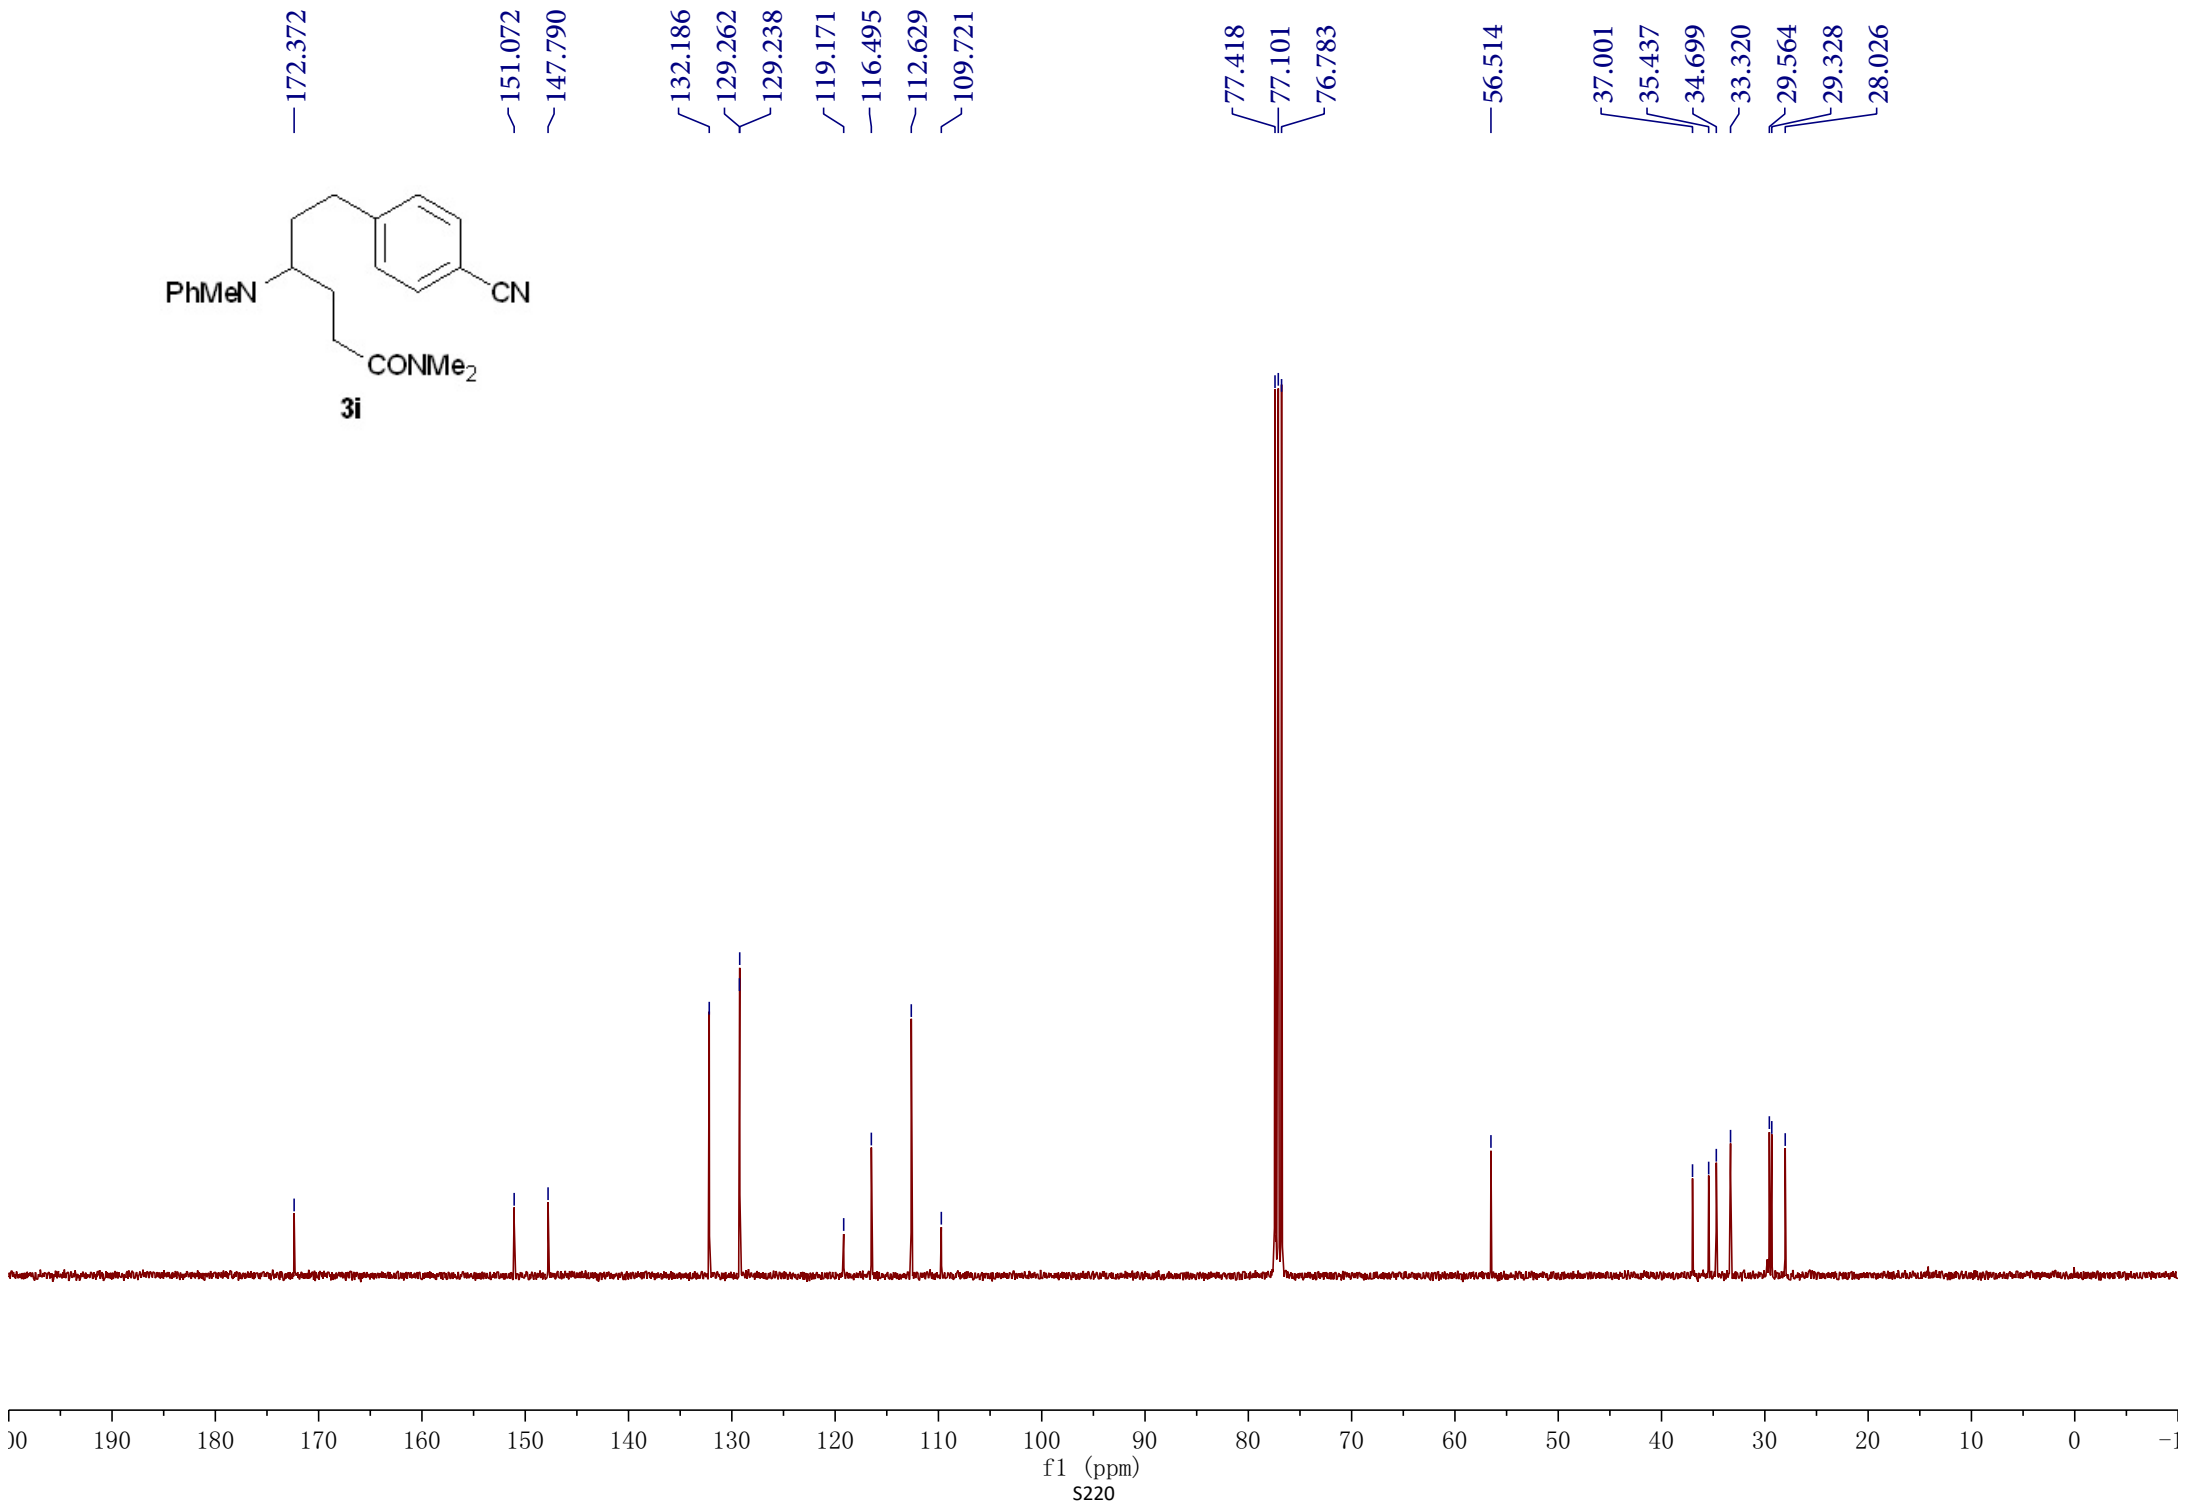

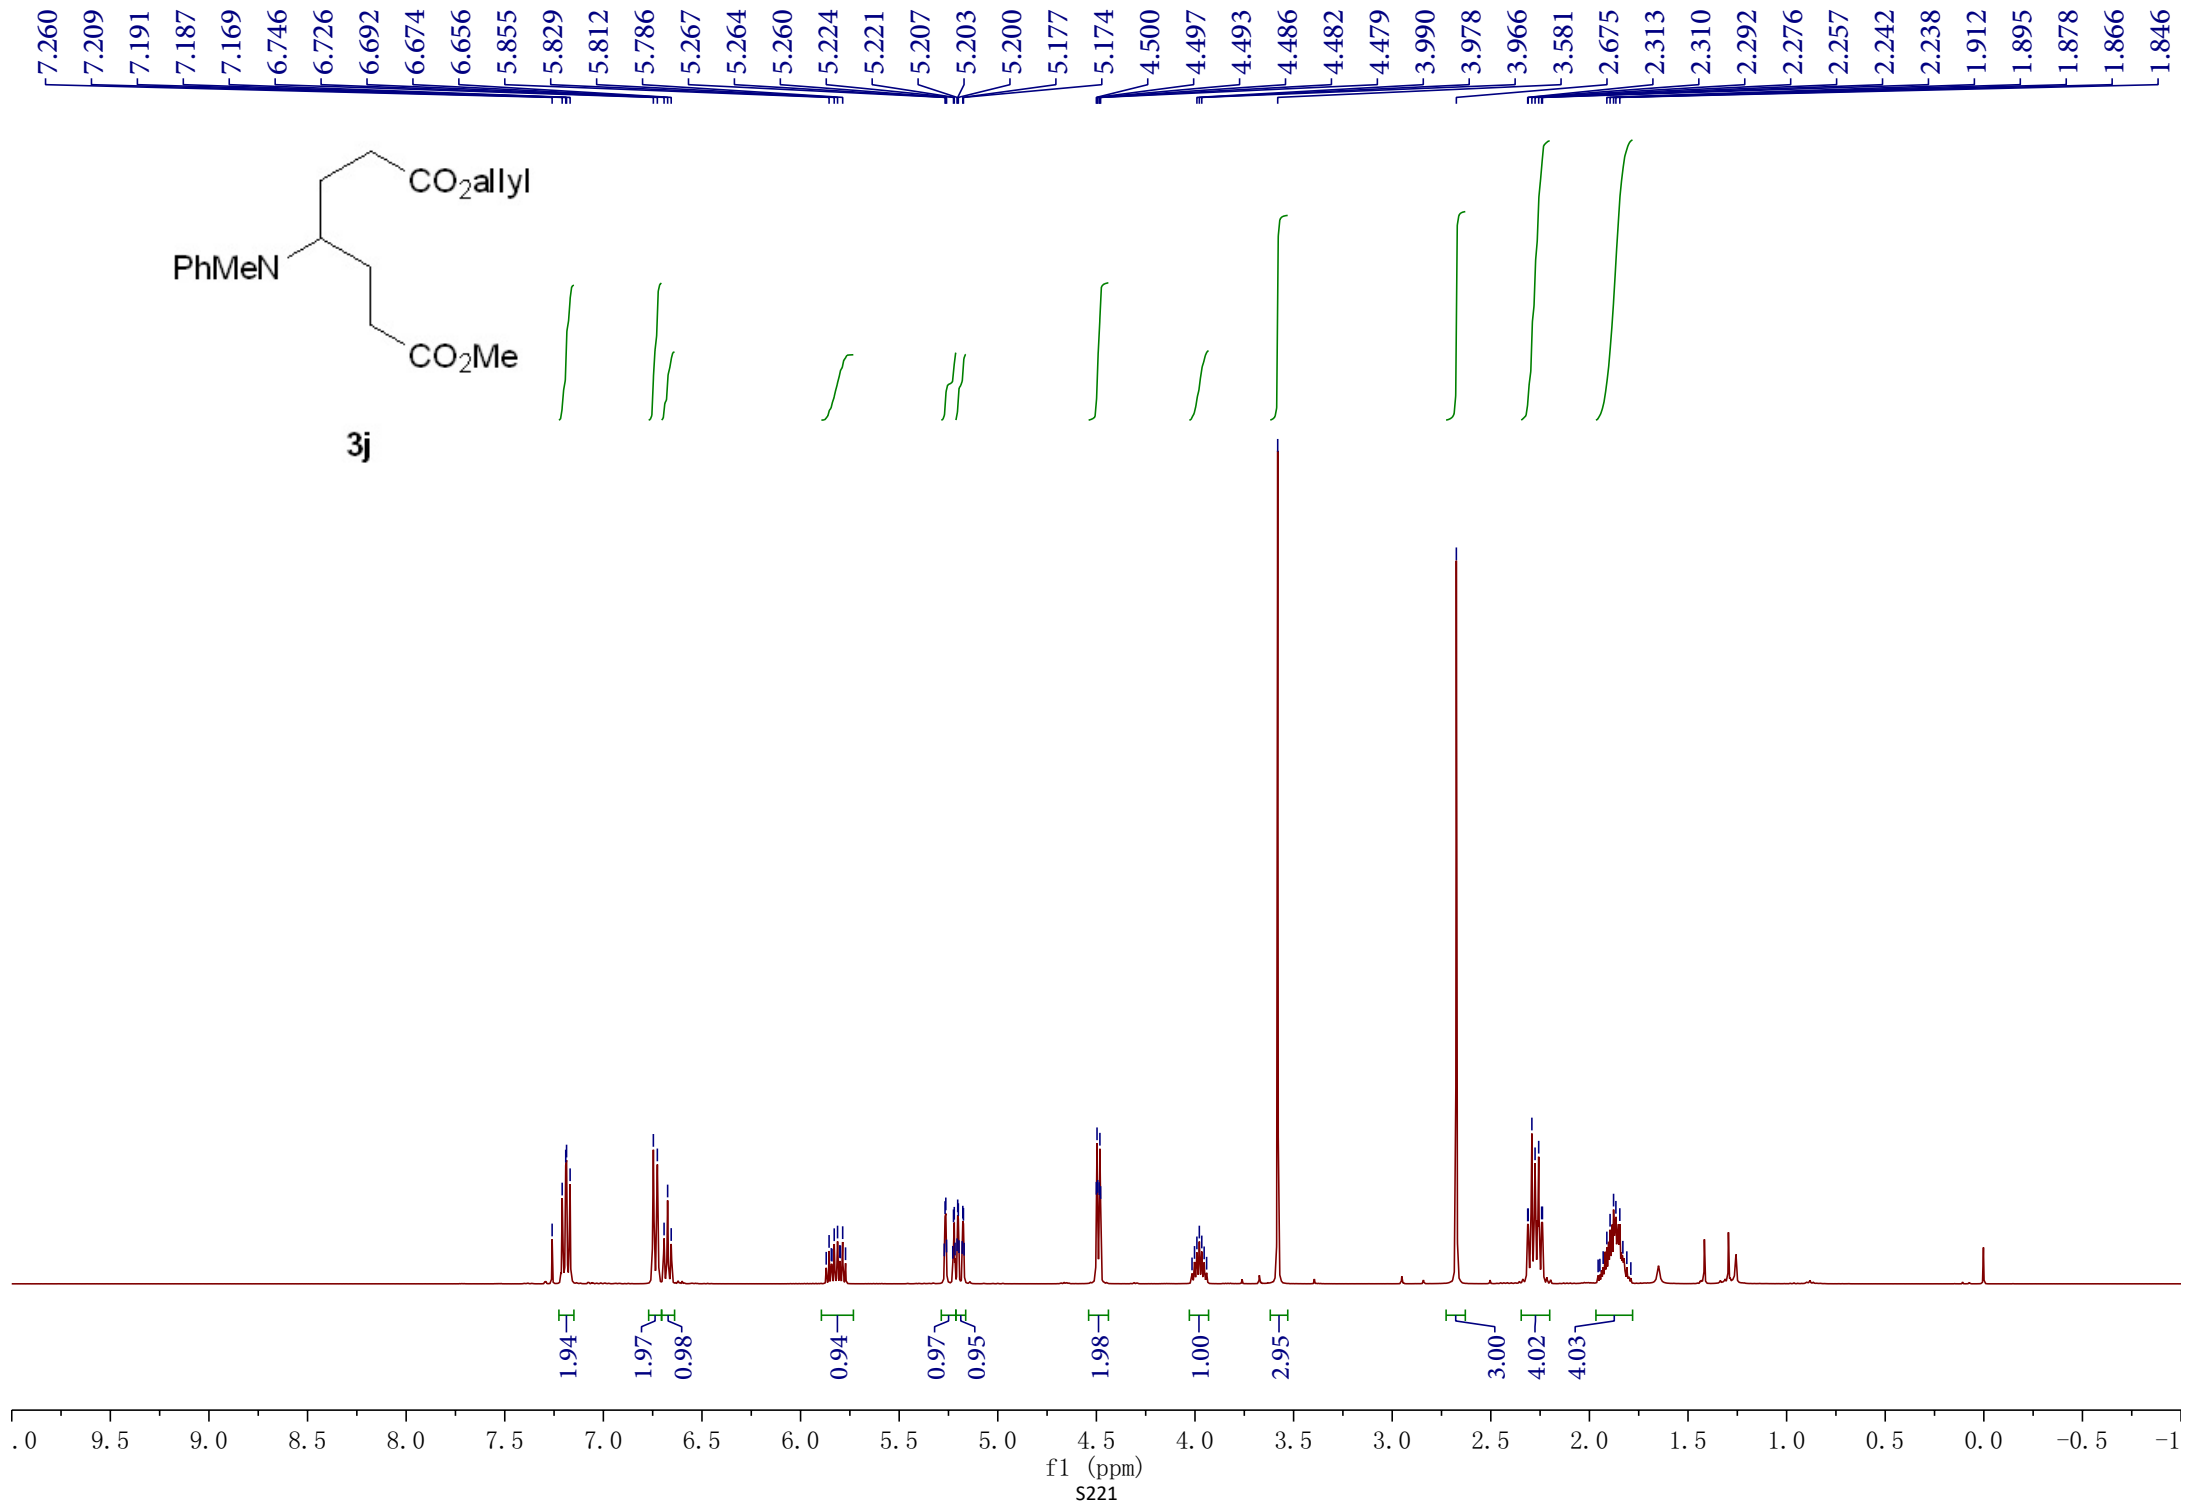

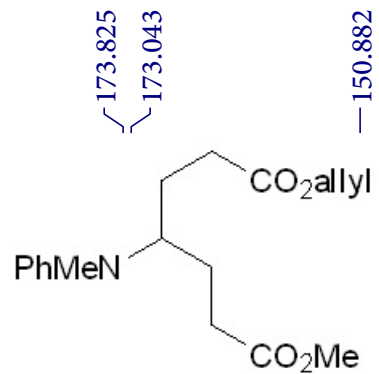

**3j**

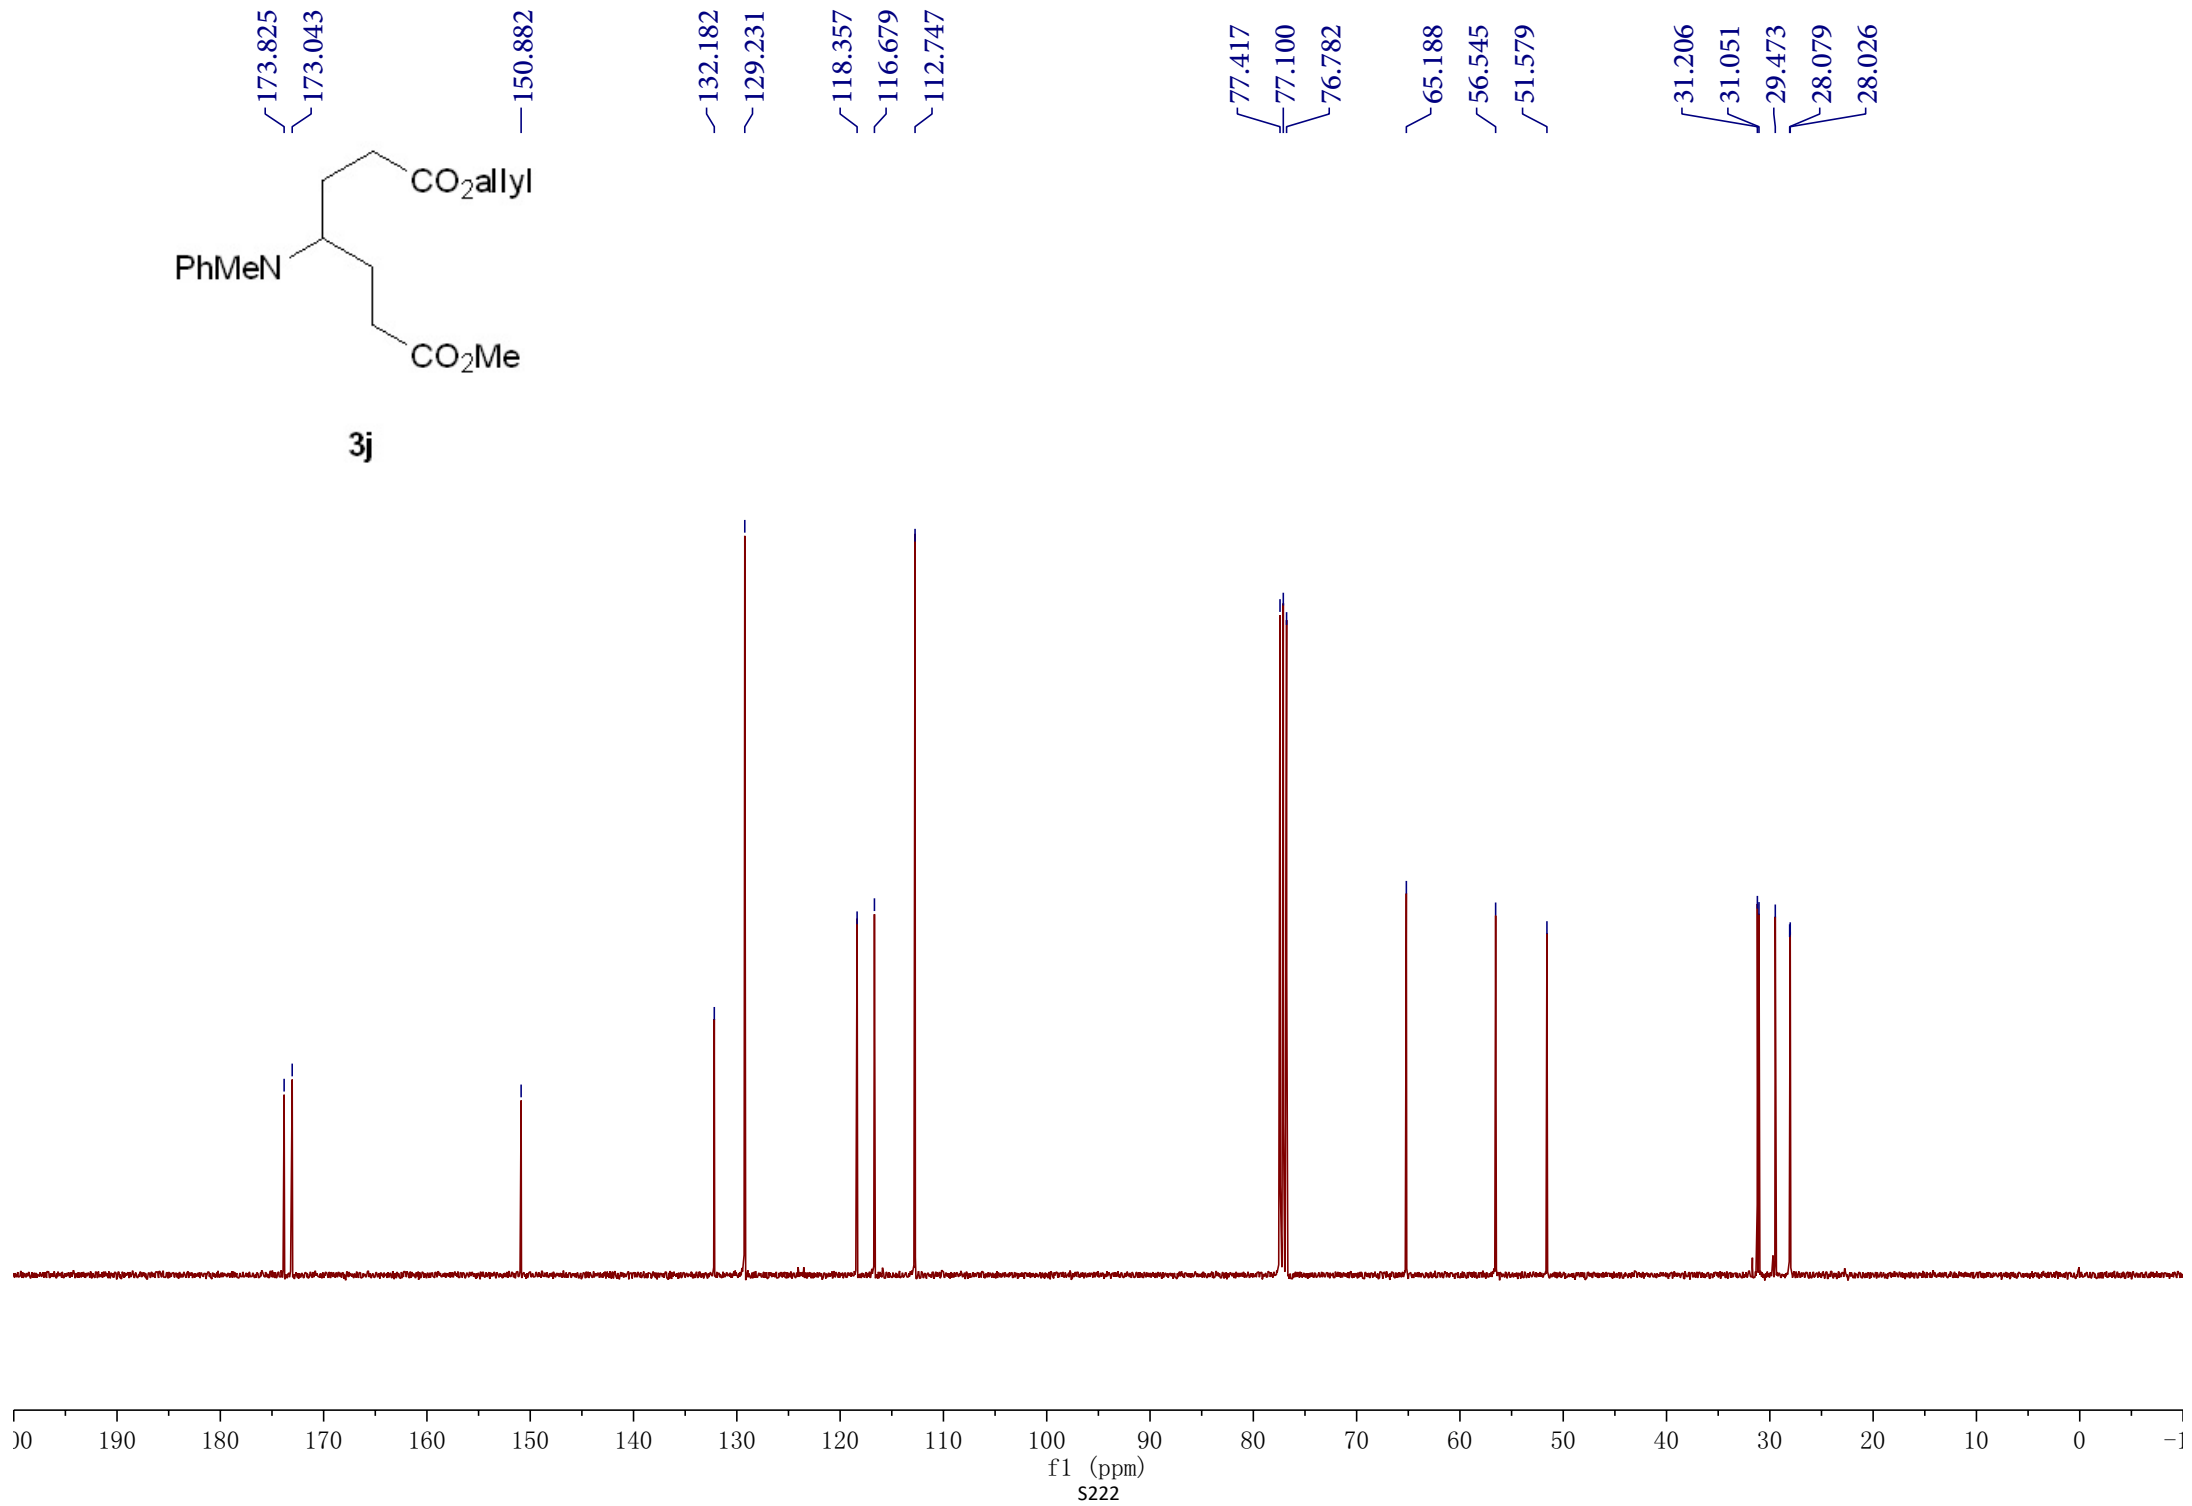

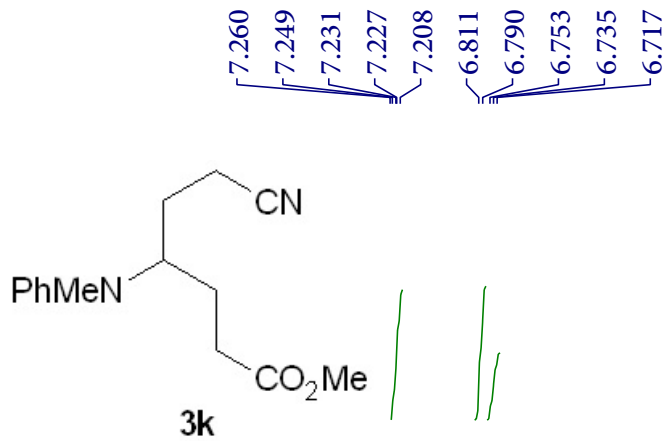

7.260  
7.249  
7.231  
7.227  
7.208  
6.811  
6.790  
6.753  
6.735  
6.717

4.063  
4.051  
4.038  
4.026  
4.013  
4.000  
3.989  
3.587

2.689  
2.311  
2.305  
2.296  
2.291  
2.286  
2.276  
2.268  
2.263  
2.258  
2.247  
2.239  
1.907  
1.893  
1.882  
1.859  
1.847

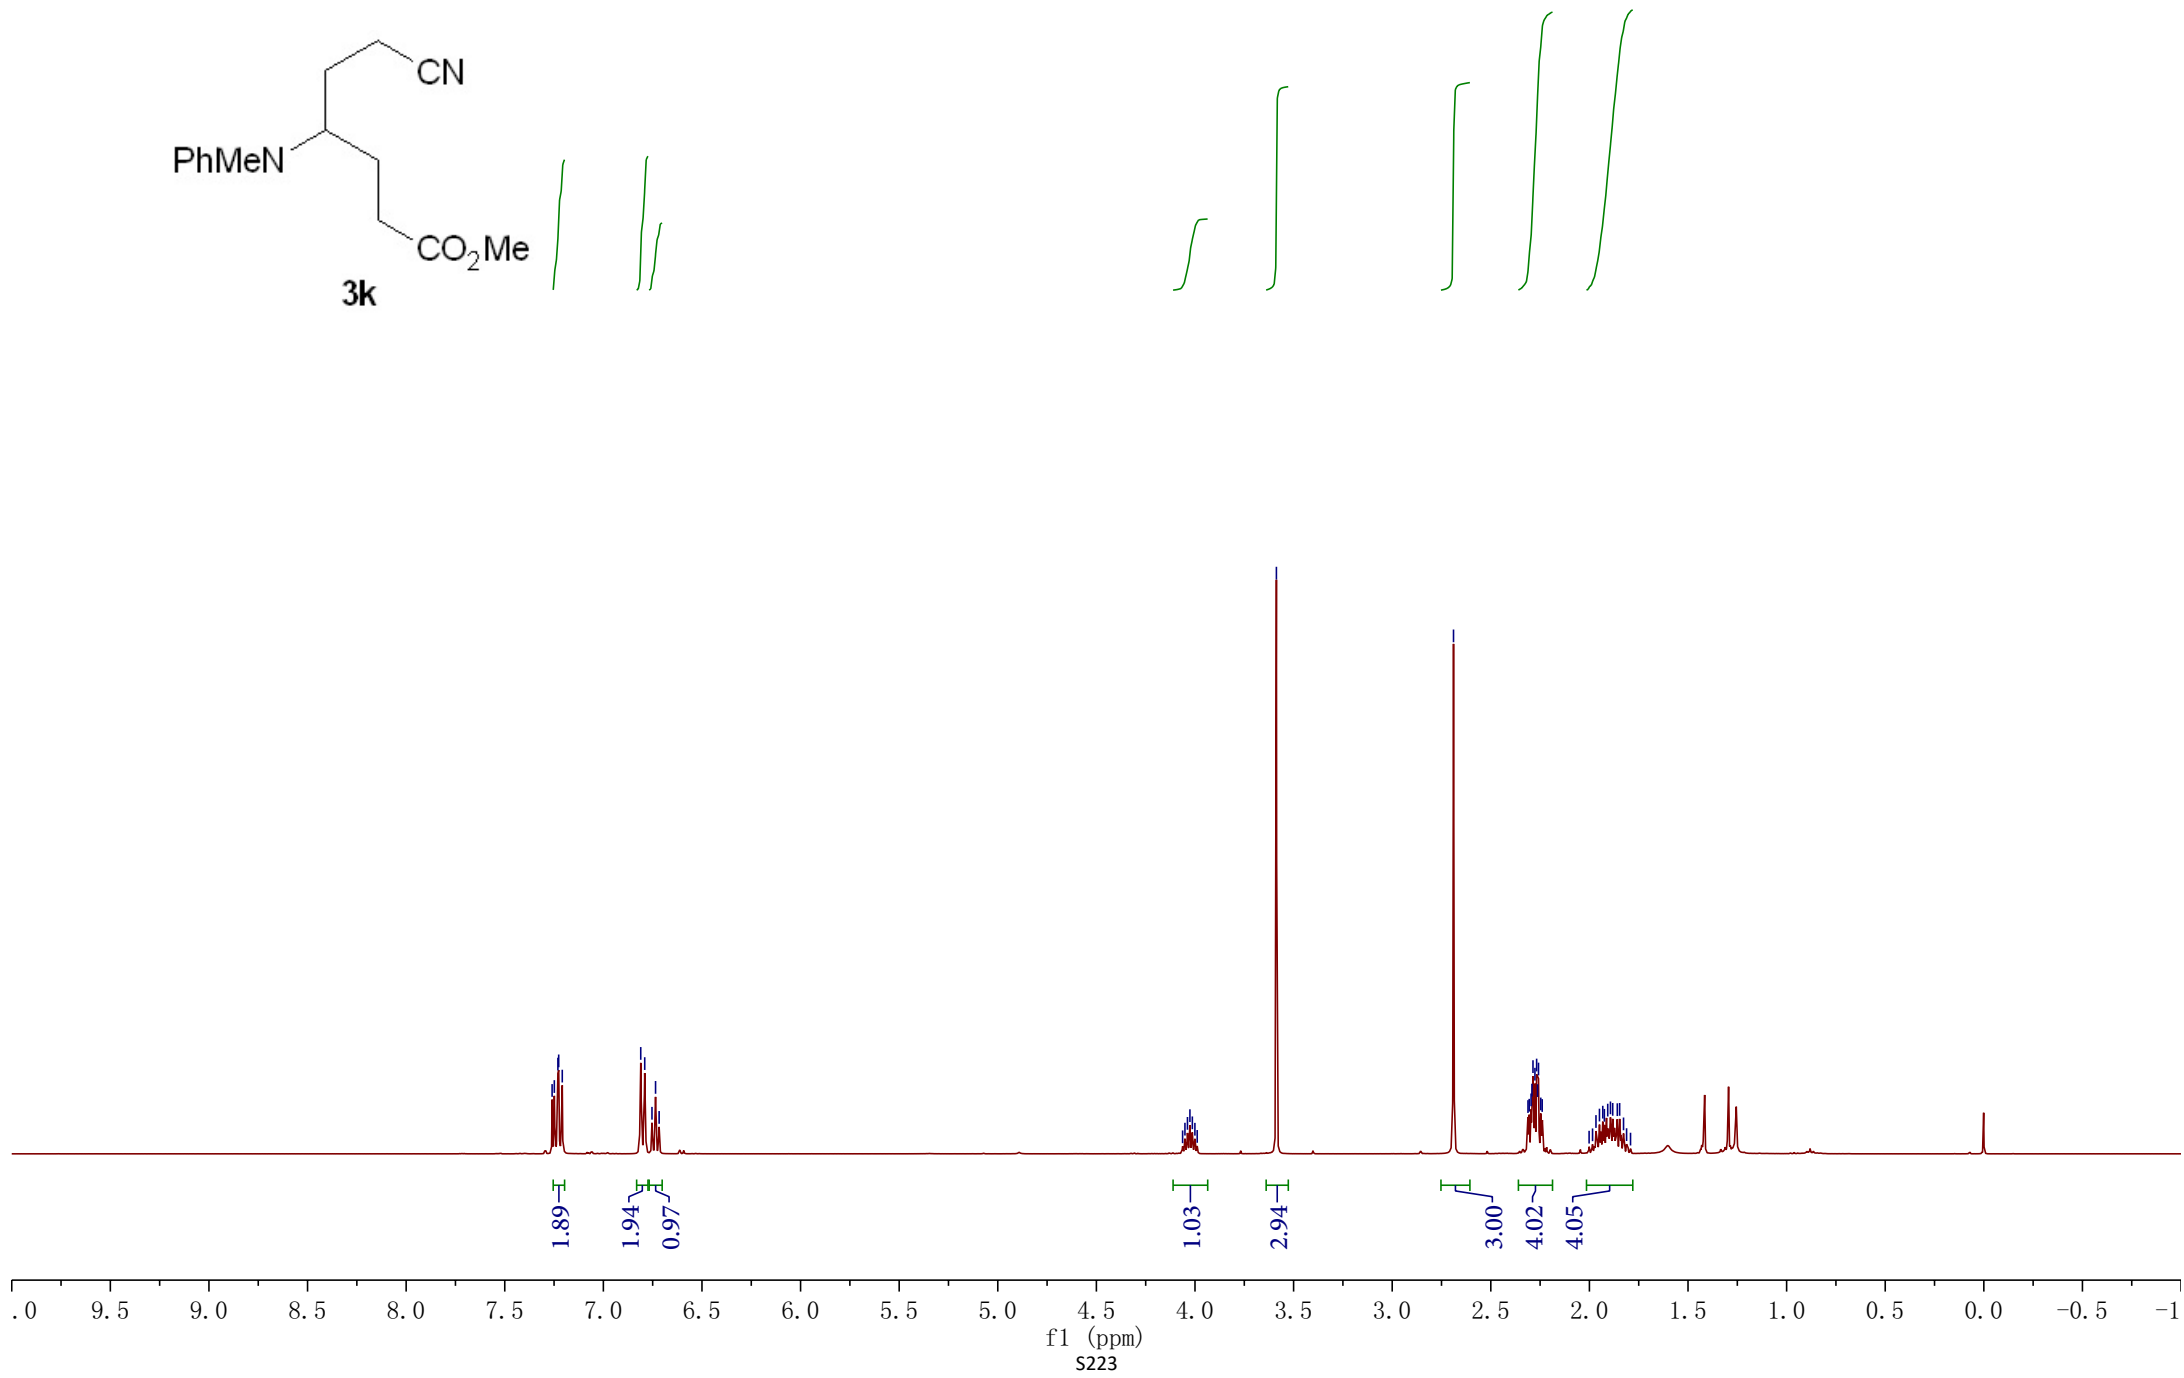

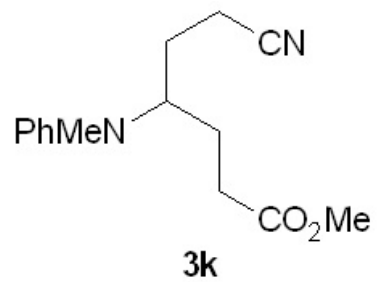

— 173.515

— 150.540

— 129.455

— 119.590

— 117.556

— 113.156

— 77.418

— 77.100

— 76.783

— 56.511

— 51.697

— 30.793

— 29.575

— 28.901

— 27.700

— 14.625

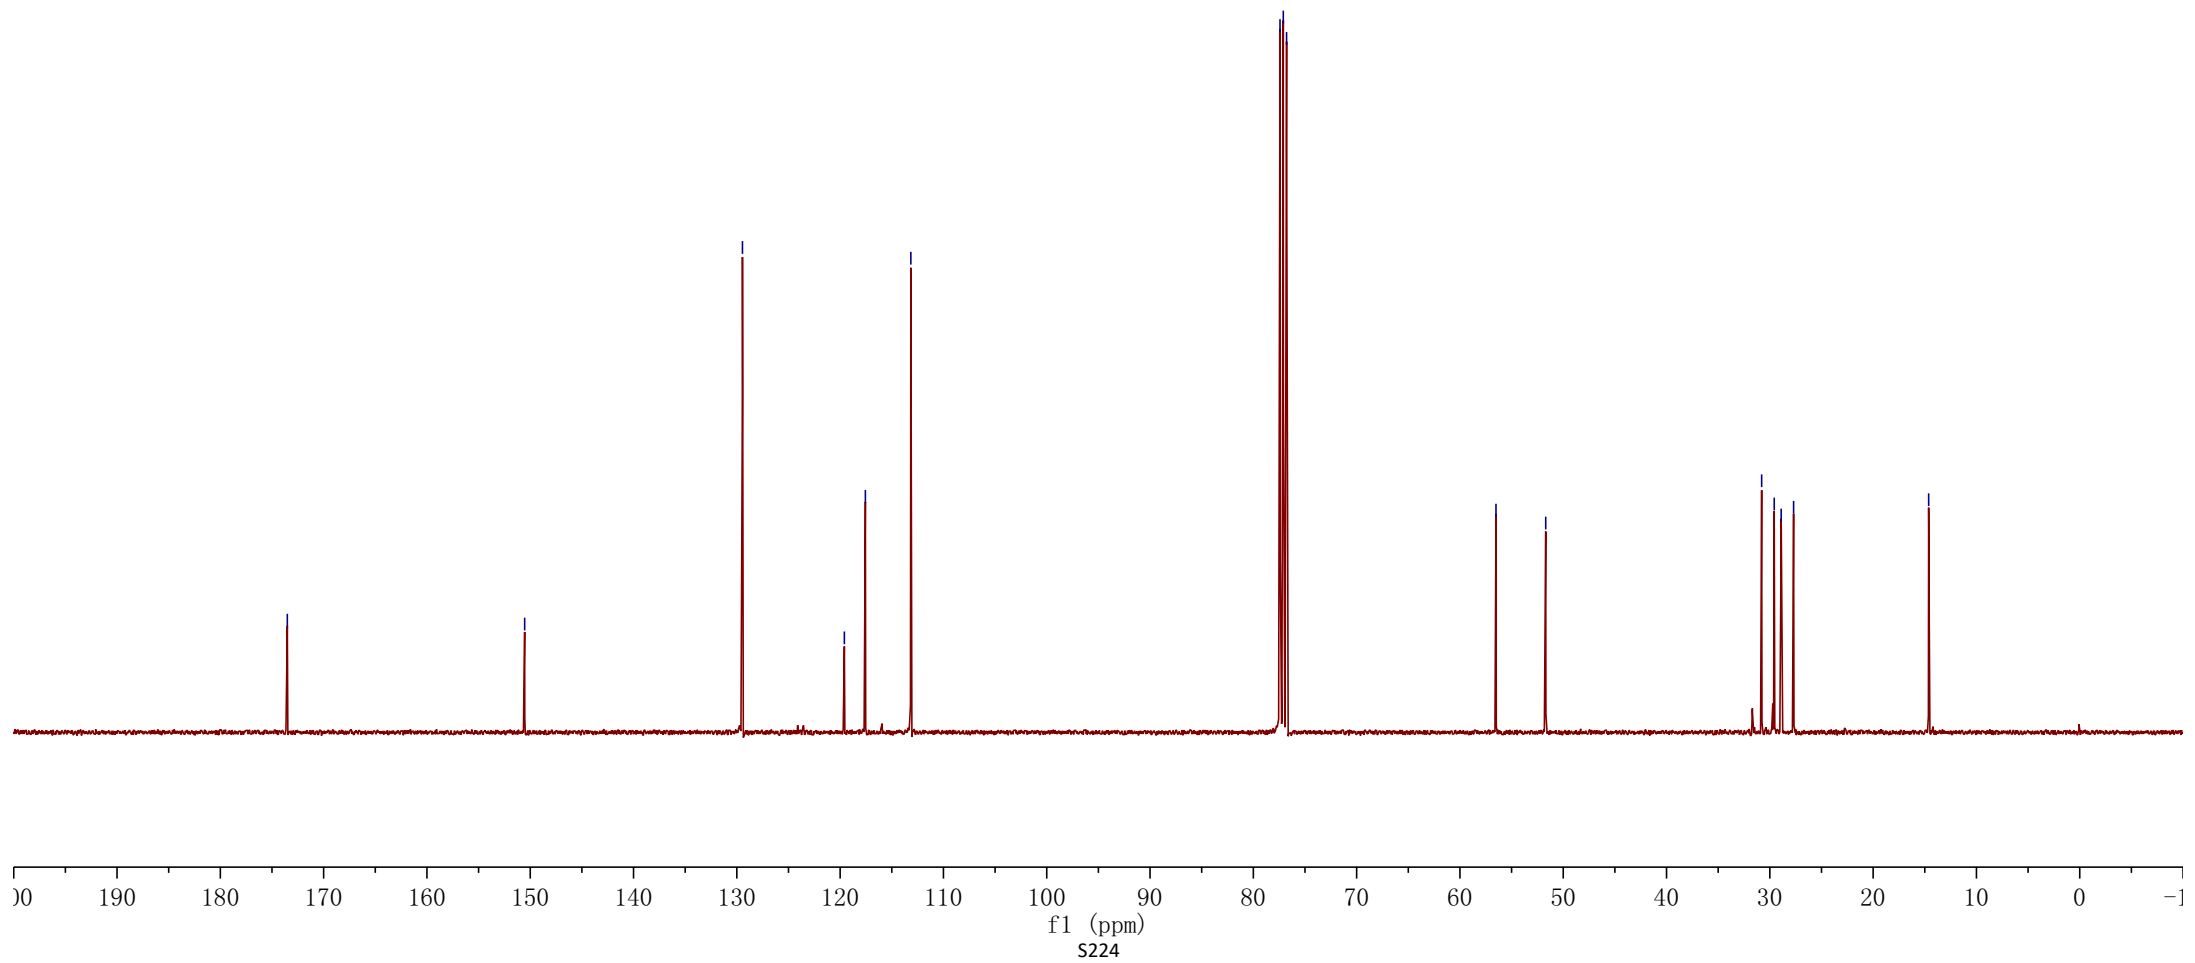

Supplement: d0cc02277b1.pdf [file d0cc02277b1.pdf]
